# Supplementary material for: Dynamic regulatory module networks for inference of cell type–specific transcriptional networks
Source: HighWire-hosted journal article supplement (doi:10.1101/gr.276542.121), 2022-06-15
Supplement: Supplemental_Fig_S7.pdf [file Supplemental_Fig_S7.pdf]

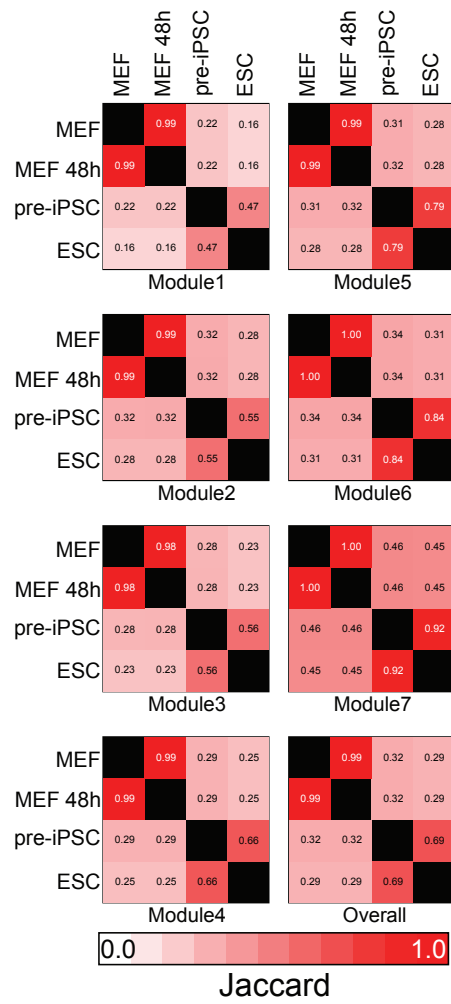

**Supplemental Figure S7.** Similarity of modules across cellular stages as measured by Jaccard coefficient, for cellular reprogramming (sequencing) dataset. The color intensity is proportional to the match.
