# Supplementary material for: Dynamic regulatory module networks for inference of cell type–specific transcriptional networks
Source: HighWire-hosted journal article supplement (doi:10.1101/gr.276542.121), 2022-06-15
Supplement: Supplemental_Fig_S8.pdf [file Supplemental_Fig_S8.pdf]

**A**

SOX17 motif logos for PWMs from the PIQ (Sherwood et al.)

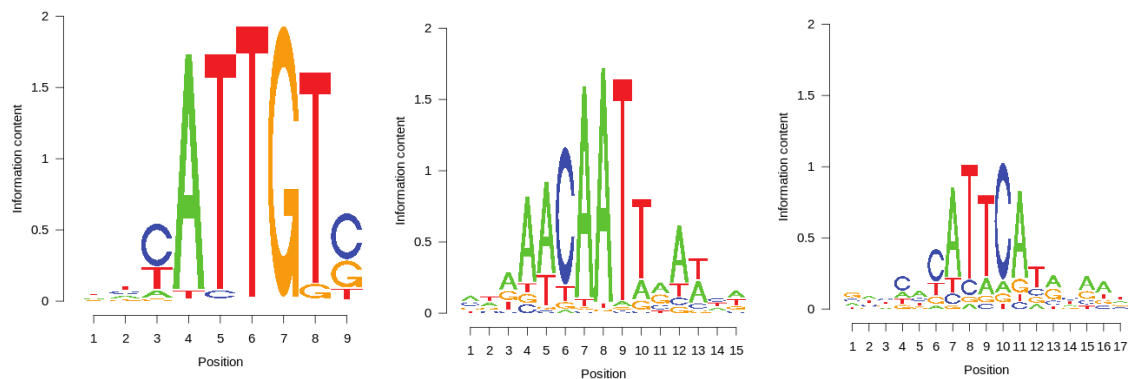**B**

SOX2 motif logo from Sherwood et al.

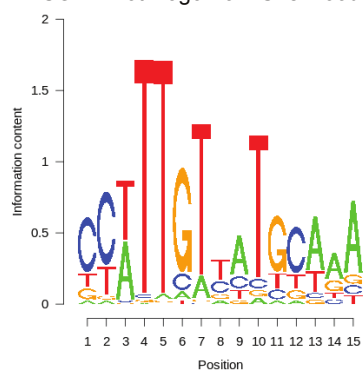

**Supplemental Figure S8.** Sequence logos of SOX17 (**A**) and SOX2 (**B**) motifs from Sherwood et al. (PIQ) for the Chronis et al. data set. The first (of three) SOX17 motifs includes a CATTGT string that is shared with the SOX2 motif. The third motif also exhibits some similarity (CATTCA) with the SOX2 motif. This may partly explain the presence of SOX17 in the embryonic stem cell state (**Figure 4B**) where it is expected to be not expressed or have low expression.
