# Supplementary material for: Dynamic regulatory module networks for inference of cell type–specific transcriptional networks
Source: HighWire-hosted journal article supplement (doi:10.1101/gr.276542.121), 2022-06-15
Supplement: Supplemental_Fig_S9.pdf [file Supplemental_Fig_S9.pdf]

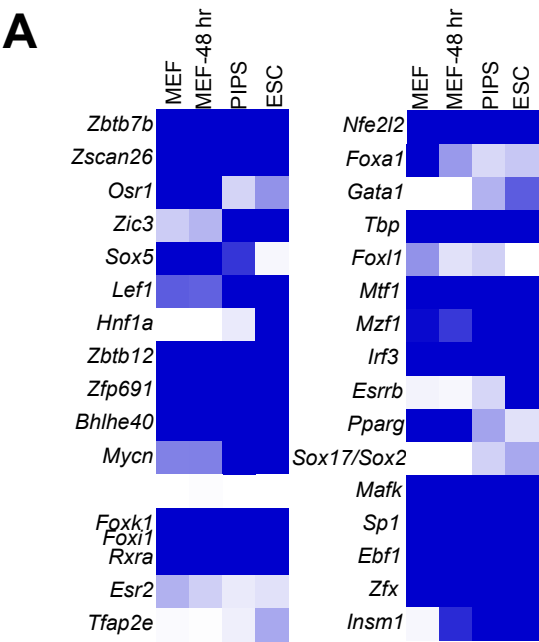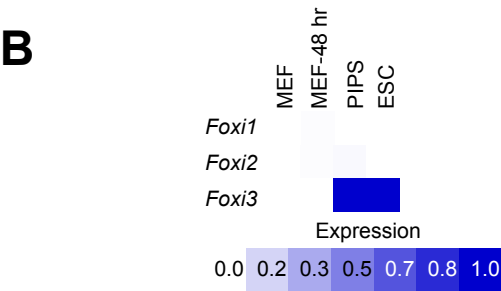

**Supplemental Figure S9. A.** Expression of regulators from the Chronis et al. data set that associated with prioritized motif features **Figure 4B**). One of the 32 regulator genes (FOXI1) presents no expression. **B.** Multiple related Forkhead Box transcription factors, notably FOXI3, that are significantly expressed and which are mapped to some of the same motifs in Cis-BP, supporting the FOXI1 regulatory feature selection from Sherwood et al. used in the analysis.
