# Supplementary material for: Dynamic regulatory module networks for inference of cell type–specific transcriptional networks
Source: HighWire-hosted journal article supplement (doi:10.1101/gr.276542.121), 2022-06-15
Supplement: Supplemental_Fig_S21.pdf [file Supplemental_Fig_S21.pdf]

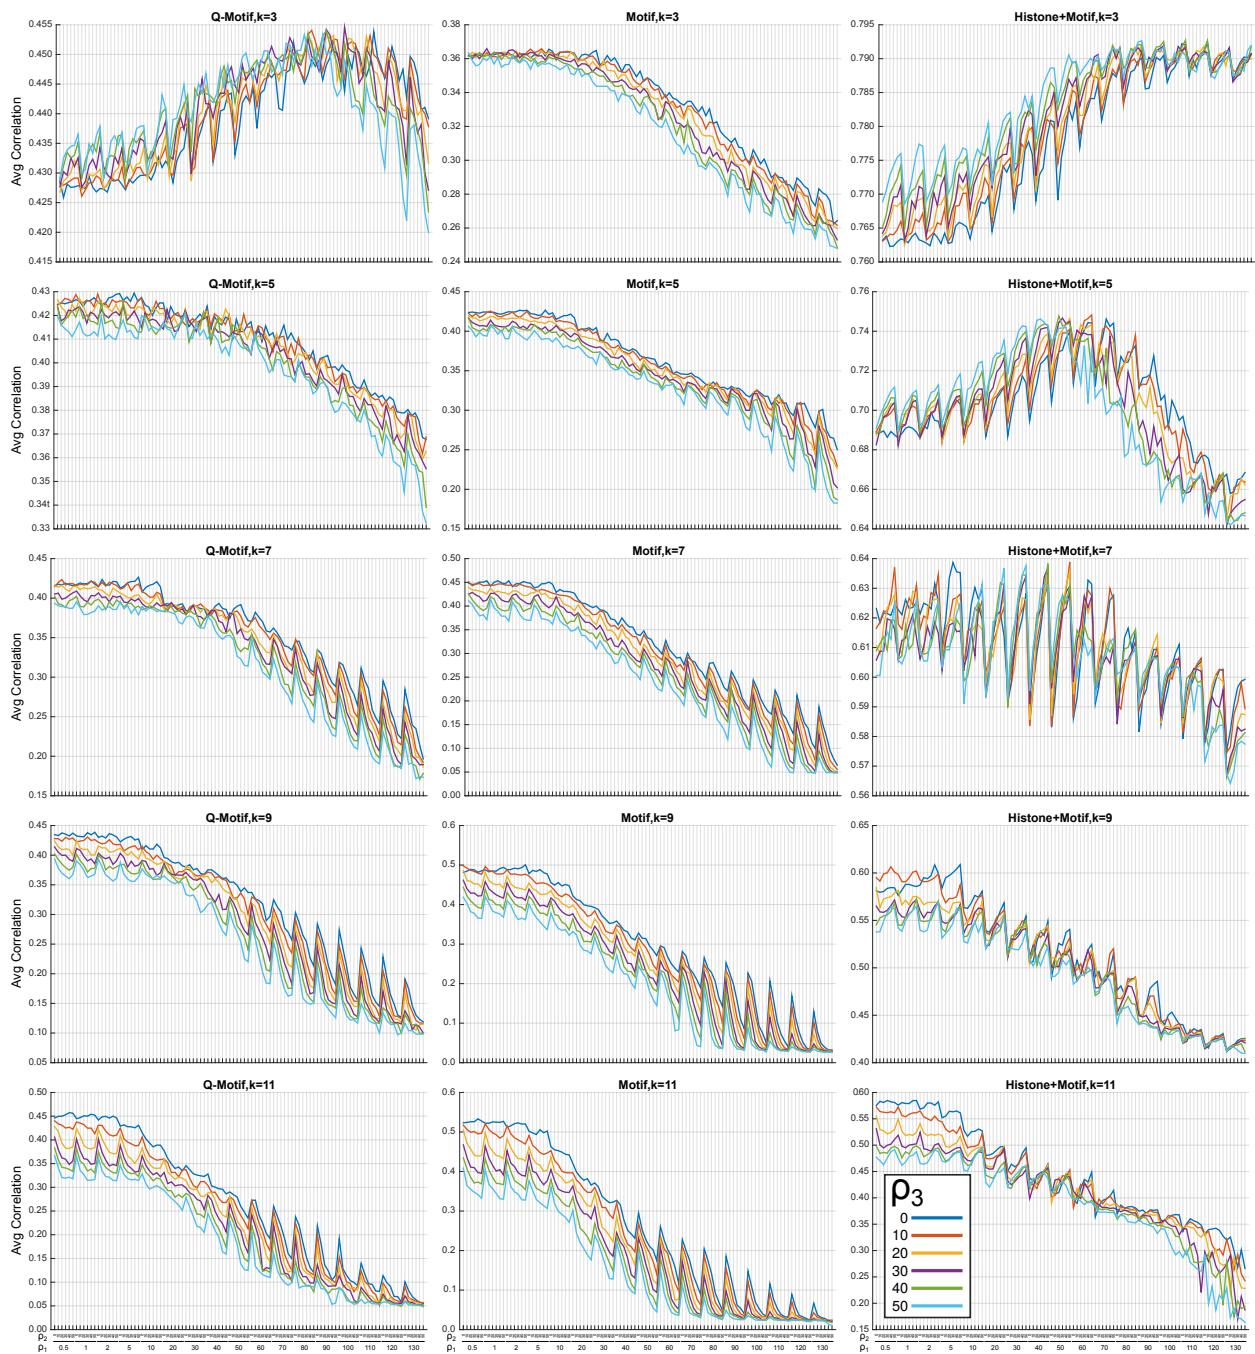

**Supplemental Figure S21.** The effect of hyper-parameters on DRMN performance for Q-Motif, Motif, and Histone+Motif features using the reprogramming sequencing dataset. Each column corresponds to type of feature sets and rows correspond to module sizes. In each panel, different colors corresponds to different values of  $\rho_3$ , the group LASSO penalty (enforcing selection of same features for all cell lines).
