# Supplementary material for: Dynamic regulatory module networks for inference of cell type–specific transcriptional networks
Source: HighWire-hosted journal article supplement (doi:10.1101/gr.276542.121), 2022-06-15
Supplement: Supplemental_Fig_S22.pdf [file Supplemental_Fig_S22.pdf]

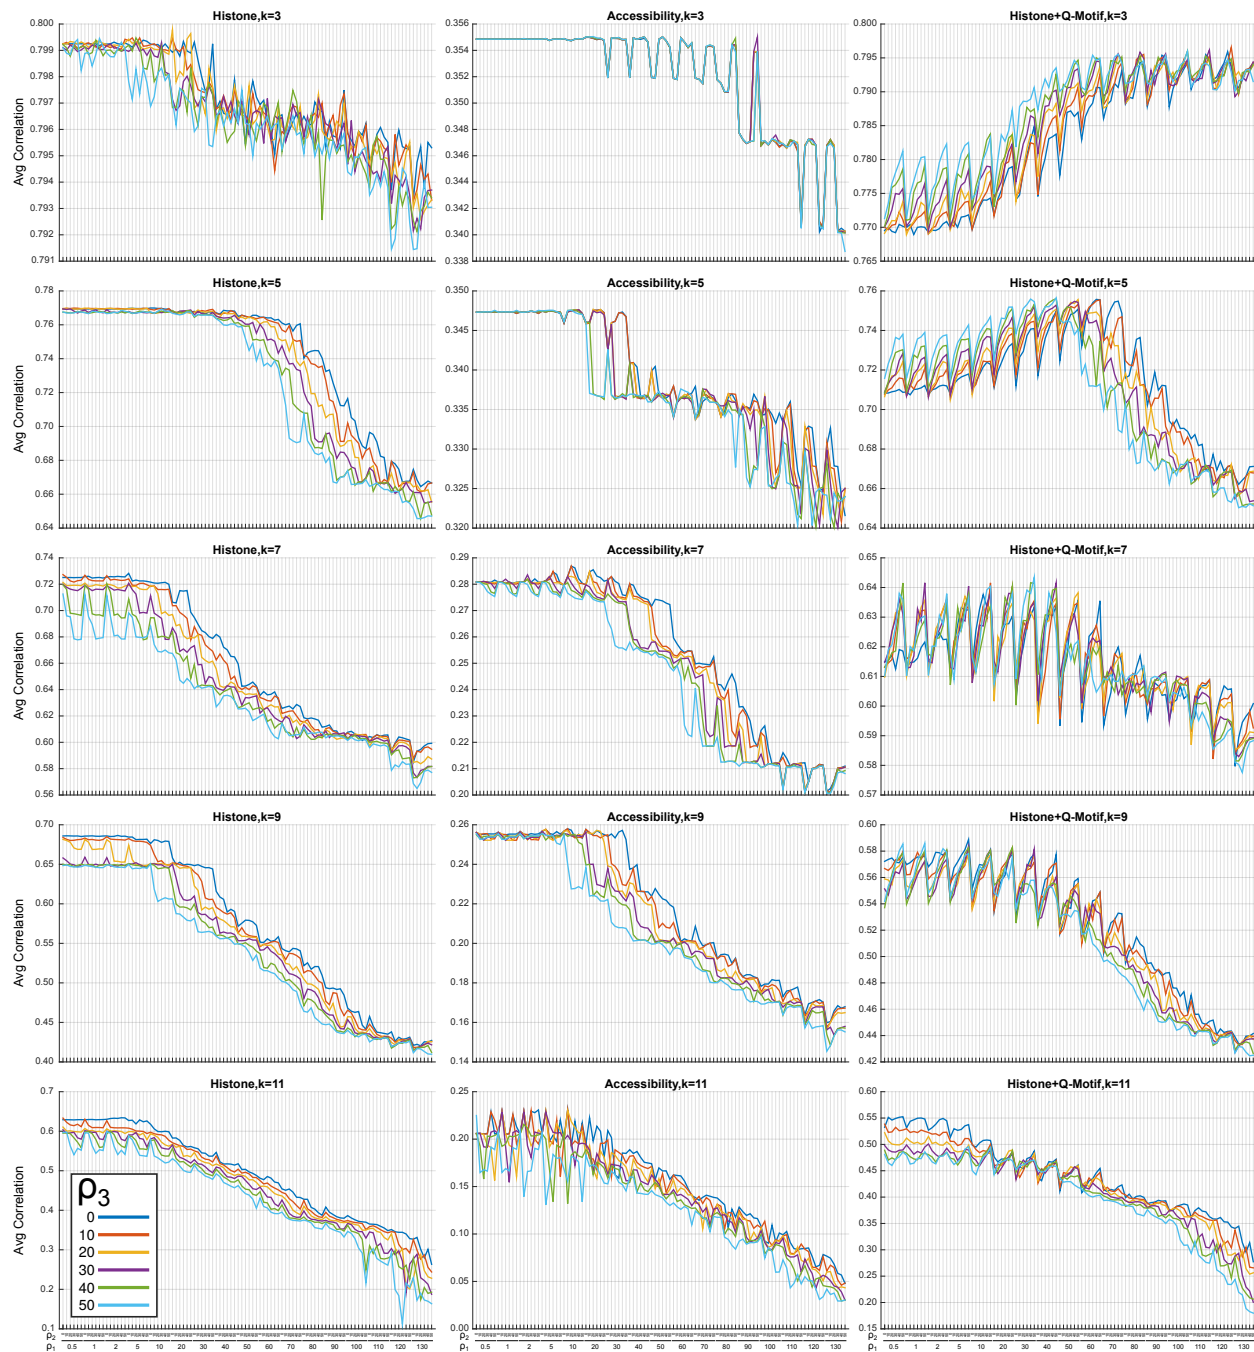

**Supplemental Figure S22.** The effect of hyper-parameters on DRMN performance for Histone, Accessibility, and Histone+Q-Motif features using the reprogramming sequencing dataset. Each column corresponds to a type of feature set and rows correspond to module sizes. In each panel, different colors corresponds to different values of  $\rho_3$ , the group LASSO penalty (enforcing selection of same features for all cell lines).
