# Supplementary material for: Dynamic regulatory module networks for inference of cell type–specific transcriptional networks
Source: HighWire-hosted journal article supplement (doi:10.1101/gr.276542.121), 2022-06-15
Supplement: Supplemental_File_S2.zip [file Supplemental_File_S2.pdf › Supplemental_File_S2/Supplemental_File_S2.pdf]

**Supplemental File S2.** The zip file contains the list of important regulators used for assessing regulator ranking and gold standard networks used for assessing the inferred networks.
