# Supplementary material for: Dynamic regulatory module networks for inference of cell type–specific transcriptional networks
Source: HighWire-hosted journal article supplement (doi:10.1101/gr.276542.121), 2022-06-15
Supplement: Supplemental_File_S3.zip [file Supplemental_File_S3.pdf › Supplemental_File_S3/Supplemental_File_S3.pdf]

**Supplemental File S3.** The zip file contains the current version of DRM software (also available on [github](#)).
