# Supplementary material for: Dynamic regulatory module networks for inference of cell type–specific transcriptional networks
Source: HighWire-hosted journal article supplement (doi:10.1101/gr.276542.121), 2022-06-15
Supplement: Supplemental_File_S4.zip [file Supplemental_File_S4.pdf › Supplemental_File_S4/Supplemental_File_S4.pdf]

**Supplemental File S4.** The zip file contains the current version of DRMN pre-processing software (also available on github).
