# Supplementary material for: Dynamic regulatory module networks for inference of cell type–specific transcriptional networks
Source: HighWire-hosted journal article supplement (doi:10.1101/gr.276542.121), 2022-06-15
Supplement: Supplemental_File_S5.zip [file Supplemental_File_S5.pdf › Supplemental_File_S5/Supplemental_File_S5.pdf]

**Supplemental File S5.** This zip file contains the input data used in DRMN experiments for the Chronis and Sridharan et al datasets. All DRMN inputs are also available on zenodo.
