# Supplementary material for: Dynamic regulatory module networks for inference of cell type–specific transcriptional networks
Source: HighWire-hosted journal article supplement (doi:10.1101/gr.276542.121), 2022-06-15
Supplement: Supplemental_File_S6.zip [file Supplemental_File_S6.pdf › Supplemental_File_S6/Supplemental_File_S6.pdf]

**Supplemental File S6.** The zip file contains four zip files (one for each dataset) containing the DRMN outputs of inferred networks and module assignments per cell line, state or time point.
