# Supplementary material for: Dynamic regulatory module networks for inference of cell type–specific transcriptional networks
Source: HighWire-hosted journal article supplement (doi:10.1101/gr.276542.121), 2022-06-15
Supplement: Supplemental_File_S7.zip [file Supplemental_File_S7.pdf › Supplemental_File_S7/Supplemental_File_S7.pdf]

**Supplemental File S7.** The zip file contains map of motif names to gene names for human and mouse Cis-BP motifs. It also contains the shortened names used in different figures.
