# Supplementary material for: Dynamic regulatory module networks for inference of cell type–specific transcriptional networks
Source: HighWire-hosted journal article supplement (doi:10.1101/gr.276542.121), 2022-06-15
Supplement: Supplemental_Table_S2.xlsx [file Supplemental_Table_S2.xlsx]

## Sheet: Caption
Supplemental Table S2. GO terms enriched in each module of each cell line, state or time point. Each sheet corresponds to one dataset.

## Sheet: LEGEND
Each sheet correspond to a dataset.
Each row correspond to a transitioning gene set.
Module_CellLine	Name of module and cell line/time point concatenated.
Term	GO term.
p-value	hypergeometric p-value.
q-value	corrected p-value.
#Genes	Number of all genes in the gene set.
#Term	Number of genes associated with the term.
#Module	Number of genes in the module.
#hits	Number of genes in the module associated with the term.
ratio	Calculated as (#hits / #Module) / (#Term / #Genes)
Genes	List of genes in the module associated with the term.

## Sheet: Reprogramming (Chronis et al.)
Module_CellLine	Term	p-value	q-value	#Genes	#Term	#Module	#hits	ratio	Genes
Module0_esc	G-protein_coupled_receptor_signaling_pathway	8.41892e-17	1.49267e-13	14143	304	998	66	3.07667	Adcy4;Adcy5;Adora1;Adra1b;Adra2a;Adrb1;Agtr2;C3ar1;C5ar1;Cacna1d;Ccr1;Ccr5;Ccr6;Ccrl2;Cx3cr1;Ednrb;Gabra1;Gabra2;Gng8;Gpr146;Gpr157;Gpr183;Gpr25;Gpr30;Gpr34;Gpr37;Gpr45;Gpr65;Gpr84;Gpr88;Grpr;Htr7;Kiss1r;Lgr5;Mchr1;Nos2;Npff;Npy1r;Npy2r;O3far1;Olfr543;Oxtr;P2ry12;P2ry13;Prok2;Prokr1;Prokr2;Ptger3;Ptgfr;Ptgir;Rgs1;Rgs5;Rgs6;Rgs7bp;S1pr5;Scg5;Sstr2;Sstr4;Sucnr1;Tacr1;Tshr;Ucn3;Vipr1;Vipr2;Vmn1r51;V…
Module0_esc	translational_elongation	6.71805e-11	5.95555e-08	14143	56	998	21	5.31425	Gm5121;mt-Ta;mt-Tc;mt-Te;mt-Tg;mt-Th;mt-Ti;mt-Tk;mt-Tl1;mt-Tl2;mt-Tm;mt-Tn;mt-Tp;mt-Tq;mt-Tr;mt-Ts1;mt-Ts2;mt-Tt;mt-Tv;mt-Tw;mt-Ty
Module0_esc	defense_response	1.17762e-09	6.95971e-07	14143	363	998	59	2.30333	Abcc9;Adra2a;Agtr2;Btk;C5ar1;Camk4;Ccl3;Ccl4;Ccl5;Ccr1;Ccr5;Ccrl2;Cd180;Cd36;Cd86;Clec4a2;Clec4d;Clec5a;Cxcl15;Cxcl2;Cxcl3;Cybb;Defb1;Fcgr1;Ggt5;Hist1h2ba;Ifi47;Ifih1;Ifit1;Iigp1;Il1rl2;Irf7;Kcnj8;Lbp;Lcn2;Ly86;Marco;Mst1r;Mx2;Nlrp3;Nod2;Nos2;Npy2r;Pik3cg;Pparg;Ptger3;Ptprc;Rnasel;Rsad2;Saa1;Selp;Serpina1b;Sp100;Tlr1;Tlr13;Tlr6;Tlr7;Tlr8;Tnf
Module0_esc	response_to_biotic_stimulus	3.71254e-08	1.27989e-05	14143	285	998	47	2.33703	Abcc9;Adh7;Btk;C5ar1;Casp1;Ccl3;Ccl5;Ccr1;Ccr5;Cd36;Cd86;Clec5a;Cxcl15;Cxcl2;Defb1;Ednrb;Fcgr1;Fcgr4;Gucy1a3;Ifih1;Ifit1;Iigp1;Kcnj8;Lbp;Lcn2;Mef2c;Mir23b;Mir27a;Mir425;Mst1r;Mx2;Nlrp3;Nod2;Nos2;Oas1b;Prrt2;Ptger3;Ptgfr;Ptgir;Ptprc;Rnasel;Rsad2;Tlr1;Tlr6;Tlr7;Tlr8;Tnf
Module0_esc	response_to_other_organism	4.17731e-08	1.27989e-05	14143	268	998	45	2.37952	Abcc9;Adh7;C5ar1;Casp1;Ccl3;Ccl5;Ccr1;Ccr5;Cd36;Cd86;Clec5a;Cxcl15;Cxcl2;Defb1;Ednrb;Fcgr1;Fcgr4;Gucy1a3;Ifih1;Ifit1;Iigp1;Kcnj8;Lbp;Lcn2;Mef2c;Mir23b;Mir27a;Mir425;Mst1r;Mx2;Nlrp3;Nod2;Nos2;Oas1b;Ptger3;Ptgfr;Ptgir;Ptprc;Rnasel;Rsad2;Tlr1;Tlr6;Tlr7;Tlr8;Tnf
Module0_esc	cell_surface_receptor_signaling_pathway	4.33128e-08	1.27989e-05	14143	1113	998	126	1.6043	Adam33;Adamts13;Adcy4;Adcy5;Adora1;Adra1b;Adra2a;Adrb1;Agtr2;Angptl1;Bmp2;Btc;C3ar1;C5ar1;Cacna1d;Ccl3;Ccl5;Ccr1;Ccr5;Ccr6;Ccrl2;Cd36;Cd3g;Clec2i;Csf2rb;Csf2rb2;Cx3cr1;Cxxc4;Ednrb;Epha3;Epha6;Fcgr1;Fgf12;Fgf14;Fgf16;Fgf9;Flt3;Frzb;Gabra1;Gabra2;Gdf6;Gdf7;Gdnf;Gng8;Gpr146;Gpr157;Gpr183;Gpr25;Gpr30;Gpr34;Gpr37;Gpr45;Gpr65;Gpr84;Gpr88;Gria1;Grin3a;Grin3b;Grpr;Hes5;Htr7;Iigp1;Il10ra;Il1rl2;Il21r;Itgb…
Module0_esc	skeletal_system_development	5.75945e-08	1.45879e-05	14143	289	998	47	2.30468	Alx4;Barx2;Bmp2;Bmp5;Col9a1;Comp;Cyp26b1;Cytl1;Dlx1;Dlx5;Fgf9;Foxd2;Frem1;Gdf5;Gja5;Hand2;Hes5;Hoxa2;Hoxa4;Hoxa6;Hoxb2;Hoxb4;Hoxb5;Hoxb7;Hoxb8;Hoxc4;Hoxc5;Hoxc9;Hoxd10;Hoxd12;Hoxd4;Lect1;Mef2c;Nkx3-2;Otor;Pax1;Pax7;Pdgfra;Ptprc;Rspo2;Sox5;Sox6;Sox9;Tbx1;Trp63;Vdr;Zic1
Module0_esc	multi-organism_process	1.59347e-07	3.53153e-05	14143	424	998	60	2.00538	Abcc9;Adh7;Ar;C5ar1;Casp1;Ccl3;Ccl4;Ccl5;Ccr1;Ccr5;Cd36;Cd86;Clec5a;Cxcl15;Cxcl2;Dach1;Defb1;Ednrb;Esr1;Fcgr1;Fcgr4;Grpr;Gucy1a3;Hand2;Ifih1;Ifit1;Iigp1;Kcnj8;Lbp;Lcn2;Mef2c;Mir143;Mir20a;Mir23b;Mir27a;Mir425;Mirlet7c-2;Mirlet7d;Mst1r;Mx2;Nlrp3;Nod2;Nos2;Oas1b;Oxtr;Ptger3;Ptgfr;Ptgir;Ptprc;Rnasel;Rsad2;Tacr1;Tbx1;Thrb;Tlr1;Tlr6;Tlr7;Tlr8;Tnf;Vdr
Module0_esc	inflammatory_response	3.88786e-07	7.65908e-05	14143	181	998	33	2.58373	Adra2a;Agtr2;Btk;Camk4;Ccl3;Ccl4;Ccl5;Ccr1;Ccrl2;Cd180;Cxcl15;Cxcl2;Cxcl3;Fcgr1;Ggt5;Hist1h2ba;Lbp;Ly86;Nlrp3;Nod2;Nos2;Pik3cg;Pparg;Ptger3;Saa1;Selp;Serpina1b;Tlr1;Tlr13;Tlr6;Tlr7;Tlr8;Tnf
Module0_esc	immune_response	9.38566e-07	0.000166408	14143	317	998	47	2.10111	Btk;C3ar1;Ccl3;Ccl4;Ccl5;Ccl6;Ccr1;Cd180;Clec4a2;Clec4d;Clec4e;Clec5a;Cx3cr1;Cxcl15;Cxcl2;Cxcl3;Cybb;Defb1;Fcgr1;Gm885;Gpr183;Ifih1;Ifit1;Iigp1;Il15;Il1rl2;Irf7;Klhl6;Lbp;Lcn2;Lilrb3;Ly86;Marco;Mef2c;Mst1r;Mx2;Nod2;Nos2;Rorc;Sp100;Tlr1;Tlr13;Tlr6;Tlr7;Tlr8;Tnf;Tnfsf10
Module0_esc	response_to_molecule_of_bacterial_origin	1.47986e-06	0.000235581	14143	124	998	25	2.85713	C5ar1;Casp1;Ccl3;Ccl5;Ccr1;Ccr5;Cd36;Cxcl15;Cxcl2;Ednrb;Fcgr4;Kcnj8;Lbp;Mef2c;Mir23b;Mir27a;Mir425;Nod2;Nos2;Ptger3;Ptgfr;Ptgir;Tlr1;Tlr6;Tnf
Module0_esc	myeloid_leukocyte_activation	1.59445e-06	0.000235581	14143	58	998	16	3.90934	Aif1;Btk;Camk4;Casp1;Ccl3;Ccl5;Cd48;Cx3cr1;Gm885;Lbp;Lcp2;Lilrb3;Nod2;Tlr1;Tlr6;Tlr7
Module0_esc	cellular_response_to_chemical_stimulus	1.81071e-06	0.000246953	14143	734	998	86	1.6604	Abp1;Adra2a;Agtr2;Ahrr;Aqp2;Ar;Bmp2;C5ar1;Casp1;Ccl3;Ccl4;Ccl5;Ccl6;Ccr1;Ccr5;Ccr6;Ccrl2;Cd36;Col4a6;Csf2rb;Csf2rb2;Cx3cr1;Cxcl15;Cxcl2;Cxcl3;Dhrs2;Dpep1;Ednrb;Epha3;Esr1;Fgf12;Fgf14;Fgf16;Fgf9;Flt3;Gpr30;Gsta1;Hist1h2ba;Ifi203;Ifit1;Ifit3;Iigp1;Il10ra;Il16;Il1rl2;Il21r;Lbp;Lcn2;Lilrb3;Mef2c;Mir106b;Mir143;Mir1894;Mir196a-1;Mir20a;Mir214;Mir27a;Mir425;Mir466f-4;Mir466j;Mir690;Mir762;Mirlet7d;Naip…
Module0_esc	immune_system_process	2.48928e-06	0.00031525	14143	762	998	88	1.63659	Abcc9;Aif1;Ank1;Btk;C3ar1;C5ar1;Camk4;Casp1;Cbfa2t3;Ccl3;Ccl4;Ccl5;Ccl6;Ccr1;Cd180;Cd36;Cd48;Cd86;Clec2i;Clec4a2;Clec4d;Clec4e;Clec5a;Cx3cr1;Cxcl15;Cxcl2;Cxcl3;Cybb;Defb1;Ednrb;Fcgr1;Fcgr4;Flt3;Gm885;Gpr183;Hand2;Hcls1;Hist1h2ba;Hoxb4;Hoxb7;Ifih1;Ifit1;Iigp1;Il15;Il16;Il1rl2;Irf7;Kcnj8;Kirrel3;Klhl6;Lbp;Lcn2;Lcp2;Lilrb3;Ly86;Lyl1;Marco;Mef2c;Mill2;Mir20a;Mst1r;Mx2;Nkx3-2;Nlrp3;Nod2;Nos2;Pax1;Ppar…
Module0_esc	innate_immune_response	3.08166e-06	0.000364252	14143	154	998	28	2.57661	Btk;Ccl5;Cd180;Clec4a2;Clec4d;Clec5a;Cybb;Defb1;Fcgr1;Ifih1;Ifit1;Iigp1;Il1rl2;Irf7;Lbp;Lcn2;Ly86;Marco;Mst1r;Mx2;Nod2;Nos2;Sp100;Tlr1;Tlr13;Tlr6;Tlr7;Tlr8
Module0_esc	organ_morphogenesis	3.32519e-06	0.000368472	14143	559	998	69	1.74924	Agtr2;Aldh1a1;Alx4;Ar;Atp6v1b1;Barx2;Bmp2;Col8a2;Col9a1;Comp;Cryaa;Cyp26b1;Dlx1;Dlx5;Esr1;Fgf9;Fli1;Foxa1;Frem1;Frzb;Gdf7;Gsdma3;Hand2;Hcn1;Hmx2;Hoxa13;Hoxa2;Hoxa4;Hoxa6;Hoxb13;Hoxb2;Hoxb4;Hoxb5;Hoxb7;Hoxb8;Hoxc4;Hoxc9;Hoxd10;Hoxd4;Mafb;Mef2c;Mir143;Mir20a;Nkx3-2;Npy1r;Npy2r;Nr4a3;Otor;Otx1;Pax1;Pax7;Pax9;Pdgfra;Prox1;Ptprq;Rspo2;Serpinb5;Six3;Sostdc1;Sox9;Tbx1;Tbx5;Thrb;Tmie;Tnf;Trp63;Ush1g;Vdr;…
Module0_esc	embryonic_organ_morphogenesis	3.87728e-06	0.000404377	14143	182	998	31	2.4138	Aldh1a1;Alx4;Atp6v1b1;Cryaa;Dlx5;Fgf9;Frzb;Hmx2;Hoxa2;Hoxa4;Hoxa6;Hoxb2;Hoxb4;Hoxb5;Hoxb7;Hoxb8;Hoxc4;Hoxc9;Hoxd10;Hoxd4;Mafb;Mef2c;Nkx3-2;Nr4a3;Otx1;Pdgfra;Ptprq;Sox9;Tbx1;Tmie;Ush1g
Module0_esc	leukocyte_chemotaxis	5.88593e-06	0.000579765	14143	50	998	14	3.96798	C5ar1;Ccl3;Ccl4;Ccl5;Ccr1;Cx3cr1;Cxcl15;Cxcl2;Cxcl3;Ednrb;Il16;Lbp;Ptpro;Scg2
Module0_esc	autonomic_nervous_system_development	6.63999e-06	0.000619616	14143	32	998	11	4.8714	Ednrb;Foxd2;Gdnf;Hand2;Hoxb2;Ntf3;Sox10;Tbx1;Tfap2b;Tlx2;Trp63
Module0_esc	cellular_response_to_molecule_of_bacterial_origin	8.06329e-06	0.000689677	14143	58	998	15	3.665	Ccl3;Ccl5;Cd36;Cxcl15;Fcgr4;Lbp;Mef2c;Mir23b;Mir27a;Mir425;Nod2;Nos2;Tlr1;Tlr6;Tnf
Module0_esc	response_to_organic_substance	8.16876e-06	0.000689677	14143	899	998	98	1.54482	Abp1;Adh1;Adh7;Adra1b;Adra2a;Agtr2;Aldh1a1;Ar;Bmp2;Btk;C5ar1;Casp1;Ccl3;Ccl5;Ccr1;Ccr5;Ccr6;Ccrl2;Cd36;Cd83;Col4a6;Csf2rb;Csf2rb2;Cx3cr1;Cxcl15;Cxcl2;Ednrb;Esr1;Fcgr4;Fgf12;Fgf14;Fgf16;Fgf9;Flt3;Foxa1;Gpr30;Grin3a;Hcls1;Htr7;Ifi203;Ifit1;Ifit3;Iigp1;Il10ra;Il1rl2;Il21r;Kcnj8;Lbp;Lilrb3;Mef2c;Mir143;Mir1894;Mir214;Mir23b;Mir27a;Mir425;Mir466f-4;Mir466j;Mir762;Mirlet7d;Naip2;Nod2;Nos2;Nr4a3;Oxtr;Pa…
Module0_esc	renal_system_process	9.37146e-06	0.000711808	14143	39	998	12	4.36041	Adora1;Adrb1;Agtr2;Aqp2;Btc;Ednrb;Hsd11b2;Htr7;Ptger3;Ptpro;Tacr1;Tfap2b
Module0_esc	leukocyte_migration	9.47788e-06	0.000711808	14143	73	998	17	3.30018	C5ar1;Ccl3;Ccl4;Ccl5;Ccr1;Cx3cr1;Cxcl15;Cxcl2;Cxcl3;Ednrb;Hist1h2ba;Il16;Lbp;Ptpro;Scg2;Selp;Tnf
Module0_esc	response_to_bacterium	9.66892e-06	0.000711808	14143	172	998	29	2.38935	Adh7;C5ar1;Casp1;Ccl3;Ccl5;Ccr1;Ccr5;Cd36;Cxcl15;Cxcl2;Defb1;Ednrb;Fcgr1;Fcgr4;Iigp1;Kcnj8;Lbp;Mef2c;Mir23b;Mir27a;Mir425;Nod2;Nos2;Ptger3;Ptgfr;Ptgir;Tlr1;Tlr6;Tnf
Module0_esc	G-protein_coupled_purinergic_receptor_signaling_pathway	1.00368e-05	0.000711808	14143	13	998	7	7.63072	Adcy5;Adora1;Gpr183;Gpr34;P2ry12;P2ry13;Sucnr1
Module0_esc	calcium_ion_homeostasis	1.07493e-05	0.000733019	14143	164	998	28	2.4195	Adra1b;Atp6v1b1;C3ar1;C5ar1;Cav3;Ccl3;Ccl5;Ccr1;Ccr5;Cxcl2;Cxcl3;Ednrb;Fxyd1;Mchr1;Npff;Npy1r;Npy2r;Oxtr;Pdgfra;Pik3cg;Ptger3;Ptprc;S100b;Slc24a3;Stc1;Tacr1;Tfap2b;Vdr
Module0_esc	response_to_lipopolysaccharide	1.33569e-05	0.000877102	14143	106	998	21	2.80753	Casp1;Ccl3;Ccl5;Ccr1;Ccr5;Cd36;Cxcl15;Ednrb;Fcgr4;Kcnj8;Lbp;Mef2c;Mir23b;Mir27a;Mir425;Nod2;Nos2;Ptger3;Ptgfr;Ptgir;Tnf
Module0_esc	response_to_chemical_stimulus	1.52867e-05	0.000967975	14143	1449	998	143	1.39855	Abp1;Adh1;Adh7;Adora1;Adra1b;Adra2a;Agtr2;Ahrr;Aldh1a1;Aqp2;Ar;Bmp2;Btk;C3ar1;C5ar1;Casp1;Ccl3;Ccl4;Ccl5;Ccl6;Ccr1;Ccr5;Ccr6;Ccrl2;Cd36;Cd83;Chl1;Col4a6;Cryaa;Csf2rb;Csf2rb2;Cx3cr1;Cxcl15;Cxcl2;Cxcl3;Cybb;Cybrd1;Cygb;Cyp4b1;Dhrs2;Dlx5;Dpep1;Dpyd;Ednrb;Epha3;Esr1;Fcgr4;Fgf12;Fgf14;Fgf16;Fgf9;Flt3;Foxa1;Foxd2;Gabrb1;Gdf7;Gpr30;Gria1;Grin3a;Gsta1;Hcls1;Hist1h2ba;Hoxa2;Hp;Htr7;Ifi203;Ifit1;Ifit3;Iigp…
Module1_esc	potassium_ion_transport	2.01701e-13	6.14582e-10	14143	78	2814	45	2.89958	Abcc8;Aqp1;Atp12a;Atp1a2;Fxyd2;Hcn3;Kcna7;Kcnab1;Kcnab2;Kcnb1;Kcnc3;Kcnd1;Kcnf1;Kcng3;Kcnh1;Kcnh2;Kcnh3;Kcnh6;Kcnip2;Kcnip3;Kcnip4;Kcnj12;Kcnj14;Kcnj15;Kcnj3;Kcnj4;Kcnk10;Kcnk2;Kcnk6;Kcnk7;Kcnma1;Kcnmb4;Kcnn1;Kcnn2;Kcnn4;Kcnq2;Kcnq5;Kcns1;Kcnt2;Kcnu1;Slc12a5;Slc12a8;Slc24a5;Slc9a7;Trpm5
Module1_esc	G-protein_coupled_receptor_signaling_pathway	3.16677e-12	4.82457e-09	14143	304	2814	112	1.85166	A630033H20Rik;Abca1;Adcy2;Adcyap1r1;Adm2;Adora2b;Adra1d;Adrb2;Agtr1a;Akr1c18;Apln;Areg;Avpr1a;Bdkrb2;Calcrl;Ccrl1;Cdk5r1;Celsr3;Cort;Cxcr2;Cxcr4;Cxcr7;Cysltr1;Darc;Drd1a;Ecel1;Ednra;Emr1;Entpd1;Entpd2;F2;Fzd1;Fzd10;Fzd3;Fzd4;Fzd8;Gal;Galr2;Ghrl;Gipr;Glrb;Gnal;Gnao1;Gnaz;Gng13;Gng4;Gpr1;Gpr126;Gpr133;Gpr135;Gpr149;Gpr153;Gpr161;Gpr162;Gpr173;Gpr182;Gpr20;Gpr3;Gpr4;Gpr50;Gpr56;Gpr62;Gpr63;Gpr64;Gpr…
Module1_esc	transmembrane_transport	1.17526e-11	1.19367e-08	14143	449	2814	149	1.66785	Abcb9;Abcc12;Abcc3;Abcc8;Adra1d;Aqp1;Aqp5;Atp1a2;Atp2b2;Atp6v1c2;Atp6v1g2;Atp7a;Atp7b;BC021785;Cacna1b;Cacna1c;Cacna1g;Cacna1h;Cacna2d2;Cacnb2;Cacng6;Cacng8;Catsper2;Cdh17;Chrnb2;Clca1;Clcn1;Clcnka;Cnga3;Cngb1;Cox4i2;Folr2;Gck;Gjc3;Glrb;Hcn3;Hrh1;Htr2b;Itpr2;Kcna7;Kcnab1;Kcnb1;Kcnc3;Kcnd1;Kcnf1;Kcng3;Kcnh1;Kcnh2;Kcnh3;Kcnip2;Kcnip3;Kcnip4;Kcnj14;Kcnj15;Kcnk10;Kcnk2;Kcnk6;Kcnk7;Kcnma1;Kcnn4;Kcnq2;…
Module1_esc	system_process	6.31626e-11	4.81141e-08	14143	736	2814	218	1.48866	Abat;Ace;Acvrl1;Adam22;Adm;Adm2;Adora2b;Adra1d;Adrb2;Aff2;Agtr1a;Alox5;Amigo1;Amn;Angpt1;Aoc3;Apba2;Apln;Aqp1;Aqp5;Arhgef15;Atp1a2;Atp2b2;Atxn1;Avpr1a;Bbs10;Bche;Bcl2;Bdkrb2;C1ql3;Cabp4;Cacna1b;Cacna1c;Cacna1g;Cacnb2;Cadps2;Cbln1;Cd34;Cdh23;Cdhr1;Chrnb2;Clcn1;Cnga3;Cngb1;Cntn2;Col11a1;Col11a2;Cplx2;Ctnna2;Ctnnd2;Cxcr4;Cyp7b1;Dpp6;Dpysl2;Drd1a;Ednra;Ephb1;Ephb6;Eya4;F5;Fabp7;Fas;Fbxo32;Fgfbp3;Fgfr…
Module1_esc	signaling	6.74311e-10	4.10925e-07	14143	2325	2814	572	1.23649	5430435G22Rik;A630033H20Rik;A830018L16Rik;Abat;Abca1;Abl1;Acot11;Acvrl1;Adam11;Adam22;Adam4;Adamts2;Adcy2;Adcy7;Adcy9;Adcyap1r1;Adm;Adm2;Adora2b;Adra1d;Adrb2;Adrbk2;Ager;Agtr1a;Aipl1;Ak5;Akap5;Akr1c18;Amigo1;Angpt1;Angpt2;Angpt4;Angptl7;Ankdd1b;Apba2;Aph1b;Aph1c;Apln;Aqp1;Areg;Arhgap22;Arhgap24;Arhgap30;Arhgap31;Arhgap6;Arhgef15;Arhgef6;Arhgef9;Arl11;Artn;Asb16;Atp1a2;Atp7a;Atxn1;Avpr1a;Baiap2l2;…
Module1_esc	regulation_of_ion_transmembrane_transport	9.62527e-10	4.23634e-07	14143	139	2814	59	2.13331	Adrb2;Cacna1b;Cacna1c;Cacna1g;Cacna1h;Cacna2d2;Cacnb2;Cacng6;Cacng8;Catsper2;Clcn1;Clcnka;Clic3;Egf;Hcn3;Igf1;Jph2;Jph3;Kcna7;Kcnab1;Kcnab2;Kcnb1;Kcnc3;Kcnd1;Kcnf1;Kcng3;Kcnh1;Kcnh2;Kcnh3;Kcnip2;Kcnip3;Kcnip4;Kcnj12;Kcnj14;Kcnj15;Kcnj3;Kcnj4;Kcnk2;Kcnk7;Kcnma1;Kcnq2;Kcnq5;Kcns1;Kcnu1;Mapk8ip2;Nlgn3;Nrxn1;Pdzk1;Plcb1;Reln;Ryr1;Scn3a;Scn4b;Scn5a;Scn8a;Shank1;Trpm5;Trpv2;Wnk2
Module1_esc	ion_transmembrane_transport	9.73232e-10	4.23634e-07	14143	255	2814	92	1.81328	Abcc8;Aqp1;Atp1a2;Atp2b2;Atp6v1c2;Atp6v1g2;Atp7a;Atp7b;Cacna1b;Cacna1c;Cacna1g;Cacna1h;Cacna2d2;Cacnb2;Cacng6;Cacng8;Catsper2;Chrnb2;Clca1;Clcn1;Clcnka;Cnga3;Cngb1;Cox4i2;Gck;Glrb;Hcn3;Hrh1;Htr2b;Itpr2;Kcna7;Kcnb1;Kcnc3;Kcnd1;Kcnf1;Kcng3;Kcnh1;Kcnh2;Kcnh3;Kcnip2;Kcnip3;Kcnip4;Kcnj14;Kcnj15;Kcnk10;Kcnk2;Kcnk6;Kcnk7;Kcnma1;Kcnn4;Kcnq2;Kcnq5;Kcns1;Kcnt2;Kcnu1;P2rx1;P2rx2;P2rx3;P2rx5;P2rx7;Pkd2l2;Rhb…
Module1_esc	cell_surface_receptor_signaling_pathway	1.16019e-09	4.41887e-07	14143	1113	2814	301	1.35922	A630033H20Rik;Abca1;Abl1;Acvrl1;Adam11;Adam22;Adam4;Adamts2;Adcy2;Adcyap1r1;Adm2;Adora2b;Adra1d;Adrb2;Agtr1a;Akr1c18;Angpt1;Angpt2;Angpt4;Aph1b;Aph1c;Apln;Areg;Artn;Avpr1a;Bcl2;Bdkrb2;Bmp6;Bmp7;Bmp8a;Bmpr1b;Boc;Calcrl;Camk2a;Casp8;Ccrl1;Cd247;Cd38;Cd3e;Cd40;Cd79a;Cdk5r1;Cebpa;Cela1;Celsr3;Chrd;Clnk;Cntf;Cort;Csf1r;Cxcr2;Cxcr4;Cxcr7;Cysltr1;Dand5;Darc;Dixdc1;Dll1;Dll3;Dner;Dok5;Drd1a;Duox1;Ebi3;Ec…
Module1_esc	regulation_of_multicellular_organismal_process	1.5165e-09	5.1342e-07	14143	1366	2814	358	1.31719	Ace;Acsl6;Acvrl1;Adm;Adm2;Adora2b;Adra1d;Adrb2;Afap1l2;Agtr1a;Akap5;Alox15;Alox5;Amigo1;Angpt2;Angpt4;Ankrd42;Apln;Aqp1;Areg;Arhgap4;Arhgef15;Aspa;Aspn;Atp1a2;Atp2b2;Avil;Avpr1a;Bche;Bcl11a;Bcl2;Bcl6;Bmp6;Bmp7;Bmpr1b;Boc;Btn2a2;C1qc;C3;Cacna1b;Cacna1c;Cacna1g;Cacna2d2;Calcrl;Camk2a;Card9;Casq1;Cbln1;Cd14;Cd34;Cd38;Cd3e;Cd40;Cdk5r1;Cebpa;Chi3l1;Chrd;Chrnb2;Clec2d;Clec4n;Cntf;Cntn2;Cort;Cplx2;Csf1r…
Module1_esc	ion_transport	2.10415e-09	6.41134e-07	14143	507	2814	156	1.54644	Abcc8;Ano3;Aqp1;Aqp11;Atp10d;Atp12a;Atp1a2;Atp2b2;Atp2c2;Atp4a;Atp6v1c2;Atp6v1g2;Atp7a;Atp7b;Best2;Cacna1b;Cacna1c;Cacna1g;Cacna1h;Cacna2d2;Cacnb2;Cacng6;Cacng8;Calcrl;Camk2a;Catsper2;Cdh23;Chrnb2;Clca1;Clcn1;Clcnka;Clic3;Cnga3;Cngb1;Cnnm1;Cox4i2;Cp;Cyp27b1;Cysltr1;Fam38b;Fxyd2;Gabrp;Gck;Glrb;Grin2d;Hcn3;Heph;Hrh1;Htr2a;Htr2b;Itpr2;Kcna7;Kcnab1;Kcnab2;Kcnb1;Kcnc3;Kcnd1;Kcnf1;Kcng3;Kcnh1;Kcnh2;Kcn…
Module1_esc	cellular_potassium_ion_transport	4.08442e-09	9.37988e-07	14143	45	2814	27	3.01557	Abcc8;Aqp1;Hcn3;Kcna7;Kcnb1;Kcnc3;Kcnd1;Kcnf1;Kcng3;Kcnh1;Kcnh2;Kcnh3;Kcnip2;Kcnip3;Kcnip4;Kcnk10;Kcnk2;Kcnk6;Kcnk7;Kcnma1;Kcnn4;Kcnq2;Kcnq5;Kcns1;Kcnt2;Kcnu1;Trpm5
Module1_esc	potassium_ion_transmembrane_transport	4.08442e-09	9.37988e-07	14143	45	2814	27	3.01557	Abcc8;Aqp1;Hcn3;Kcna7;Kcnb1;Kcnc3;Kcnd1;Kcnf1;Kcng3;Kcnh1;Kcnh2;Kcnh3;Kcnip2;Kcnip3;Kcnip4;Kcnk10;Kcnk2;Kcnk6;Kcnk7;Kcnma1;Kcnn4;Kcnq2;Kcnq5;Kcns1;Kcnt2;Kcnu1;Trpm5
Module1_esc	multicellular_organismal_process	4.24354e-09	9.37988e-07	14143	3109	2814	734	1.18657	4930506M07Rik;6230427J02Rik;AI464131;AW551984;Abat;Abca1;Abca5;Abcg1;Ace;Acsbg2;Acsl6;Acvrl1;Adam1a;Adam22;Adamts2;Adcyap1r1;Adm;Adm2;Adora2b;Adra1d;Adrb2;Aff2;Aff3;Ager;Agtr1a;Aipl1;Akap5;Alox15;Alox5;Alox5ap;Amigo1;Amigo3;Amn;Ang;Angpt1;Angpt2;Angpt4;Aoc3;Apba2;Aph1c;Apln;Apom;Aqp1;Aqp11;Aqp5;Areg;Arg1;Arhgap22;Arhgap24;Arhgap4;Arhgef15;Artn;Aspa;Aspn;Asprv1;Atl1;Atoh8;Atp1a2;Atp2b2;Atp7a;Atp7b…
Module1_esc	metal_ion_transport	4.30976e-09	9.37988e-07	14143	303	2814	103	1.70849	Abcc8;Aqp1;Atp12a;Atp1a2;Atp2b2;Atp2c2;Atp7a;Atp7b;Cacna1b;Cacna1c;Cacna1g;Cacna1h;Cacna2d2;Cacnb2;Cacng6;Cacng8;Calcrl;Camk2a;Catsper2;Cdh23;Chrnb2;Cp;Cyp27b1;Cysltr1;Fxyd2;Gck;Hcn3;Heph;Hrh1;Htr2a;Htr2b;Itpr2;Kcna7;Kcnab1;Kcnab2;Kcnb1;Kcnc3;Kcnd1;Kcnf1;Kcng3;Kcnh1;Kcnh2;Kcnh3;Kcnh6;Kcnip2;Kcnip3;Kcnip4;Kcnj12;Kcnj14;Kcnj15;Kcnj3;Kcnj4;Kcnk10;Kcnk2;Kcnk6;Kcnk7;Kcnma1;Kcnmb4;Kcnn1;Kcnn2;Kcnn4;Kcn…
Module1_esc	regulation_of_ion_transport	5.38999e-09	1.09489e-06	14143	233	2814	84	1.81193	Abcc8;Adcyap1r1;Adrb2;Akap5;Atp2b2;Atp4a;Bcl2;Cacna1b;Cacna1c;Cacna1g;Cacna1h;Cacna2d2;Cacnb2;Cacng6;Cacng8;Casq1;Catsper2;Clcn1;Clcnka;Clic3;Cxcl1;Cxcr4;Dpp6;Drd1a;Ednra;Egf;F2;Gck;Gnao1;Hcn3;Htr2a;Igf1;Jph2;Jph3;Kcna7;Kcnab1;Kcnab2;Kcnb1;Kcnc3;Kcnd1;Kcnf1;Kcng3;Kcnh1;Kcnh2;Kcnh3;Kcnip2;Kcnip3;Kcnip4;Kcnj12;Kcnj14;Kcnj15;Kcnj3;Kcnj4;Kcnk2;Kcnk7;Kcnma1;Kcnq2;Kcnq5;Kcns1;Kcnu1;Mapk8ip2;Mylk;Nlgn3;…
Module1_esc	cation_transport	8.54386e-09	1.62707e-06	14143	392	2814	125	1.60266	Abcc8;Aqp1;Atp10d;Atp12a;Atp1a2;Atp2b2;Atp2c2;Atp6v1c2;Atp6v1g2;Atp7a;Atp7b;Cacna1b;Cacna1c;Cacna1g;Cacna1h;Cacna2d2;Cacnb2;Cacng6;Cacng8;Calcrl;Camk2a;Catsper2;Cdh23;Chrnb2;Cnga3;Cox4i2;Cp;Cyp27b1;Cysltr1;Fam38b;Fxyd2;Gck;Hcn3;Heph;Hrh1;Htr2a;Htr2b;Itpr2;Kcna7;Kcnab1;Kcnab2;Kcnb1;Kcnc3;Kcnd1;Kcnf1;Kcng3;Kcnh1;Kcnh2;Kcnh3;Kcnh6;Kcnip2;Kcnip3;Kcnip4;Kcnj12;Kcnj14;Kcnj15;Kcnj3;Kcnj4;Kcnk10;Kcnk2;Kc…
Module1_esc	cell_communication	9.20012e-09	1.64899e-06	14143	2427	2814	586	1.21352	5430435G22Rik;A630033H20Rik;A830018L16Rik;Abat;Abca1;Abl1;Acot11;Acvrl1;Adam11;Adam22;Adam4;Adamts2;Adcy2;Adcy7;Adcy9;Adcyap1r1;Adm;Adm2;Adora2b;Adra1d;Adrb2;Adrbk2;Ager;Agtr1a;Aipl1;Ak5;Akap5;Akr1c18;Amigo1;Angpt1;Angpt2;Angpt4;Angptl7;Ankdd1b;Apba2;Aph1b;Aph1c;Apln;Aqp1;Areg;Arhgap22;Arhgap24;Arhgap30;Arhgap31;Arhgap6;Arhgef15;Arhgef6;Arhgef9;Arl11;Artn;Asb16;Atp1a2;Atp7a;Atxn1;Avpr1a;Baiap2l2;…
Module1_esc	cell-cell_signaling	1.24874e-07	2.11384e-05	14143	325	2814	104	1.6083	Abat;Adm;Adrb2;Apba2;Aqp1;Arhgef15;Atp1a2;Atxn1;Barx1;Bche;C1ql3;Cacna1b;Cacna1c;Cacna1g;Cacnb2;Cadps2;Cbln1;Cd300a;Cd34;Chrnb2;Cplx2;Ctnna2;Dll1;Dpysl2;Drd1a;Ephb1;Ephb6;Fcer1g;Fcgr3;Fgf1;Fgf10;Fgf3;Fgf7;Fgf8;Fgfr2;Fgfr4;Fzd1;Fzd4;Gad1;Gata3;Gata4;Ghrl;Gjc3;Glrb;Grin2d;Grm4;Hgf;Hoxa11;Hoxa5;Hoxd11;Hrh1;Il1rn;Il6;Ildr2;Irs1;Kcnma1;Lin7b;Lynx1;Maob;Mapk8ip2;Naalad2;Napb;Ncan;Neurod1;Nlgn3;Nrxn1;Op…
Module1_esc	regulation_of_transport	5.28236e-07	8.26708e-05	14143	765	2814	207	1.35996	Abca1;Abcc8;Abcg1;Acsl6;Adcyap1r1;Adora2b;Adrb2;Agtr1a;Akap5;Ang;Angpt1;Aoc3;Apln;Aqp1;Arg1;Atp2b2;Atp4a;Avpr1a;Bcl2;Btn2a2;C1qtnf2;C3;Cacna1b;Cacna1c;Cacna1g;Cacna1h;Cacna2d2;Cacnb2;Cacng6;Cacng8;Cadps2;Camk2a;Casq1;Catsper2;Cd14;Cd300a;Cd34;Cd38;Cd40;Cd47;Cdk5r1;Chrnb2;Clcn1;Clcnka;Clec4n;Clic3;Cnst;Cntf;Crebl2;Csf1r;Cxcl1;Cxcr4;Dpp6;Dpysl2;Drd1a;Eda;Ednra;Efna5;Egf;F2;Fcer1g;Fcgr3;Fes;Fgf10;Fg…
Module1_esc	chemical_homeostasis	5.42637e-07	8.26708e-05	14143	514	2814	148	1.44716	4930506M07Rik;Abca1;Abcg1;Adam22;Adm;Adrb2;Ager;Agtr1a;Aifm3;Amigo1;Aqp1;Aqp11;Atp12a;Atp1a2;Atp2b2;Atp4a;Atp7a;Atp7b;Atxn1;Avpr1a;Bcl2;Bdkrb2;Best2;C1qtnf3;Cacna1c;Cacna1g;Cd38;Cd40;Cd52;Cdh23;Chrnb2;Cntf;Cntn2;Ctsh;Cxcl1;Cxcr2;Cxcr4;Cyp27b1;Dpp6;Drd1a;Ednra;Ephb6;Epor;F2;Fabp4;Fam38b;Fgf7;Fgfr4;Foxa3;Gal3st1;Galr2;Gck;Ghrl;Gipr;Gjc3;Glrb;Gm14511;Gm5635;Gpr3;Gpr39;Grin2d;Heph;Hfe;Hrc;Htr2a;Htr2b…
Module1_esc	immune_response	8.82456e-07	0.00012804	14143	317	2814	99	1.56962	Atp7a;Bcl6;Bdkrb2;Bmp6;C1qa;C1qb;C1ra;C1rl;C2;C3;C4b;C8g;Ccl12;Ccl20;Ccl8;Ccl9;Cd14;Cd300a;Cfb;Clec4n;Cplx2;Csf1r;Ctsh;Cxcl1;Cyp27b1;Dhx58;Eda;Fas;Fcer1g;Fcgr3;Fgr;Gata3;Gbp3;Gbp4;Gbp7;Gbp9;Gch1;Gcnt3;Gm106;H2-DMa;H2-M3;H2-Q10;H2-T23;Hfe;Il12rb1;Il18;Il18bp;Il18rap;Il1r1;Il20rb;Il23a;Il34;Il6;Il7;Irf5;Irf8;Irgm2;Isg20;Itgal;Kynu;Lat2;Lax1;Ly96;Map3k14;March1;Masp2;Mr1;Nlrx1;Osm;Pf4;Pglyrp1;Prg4;P…
Module1_esc	neurological_system_process	1.09975e-06	0.000152316	14143	545	2814	154	1.42017	Abat;Ace;Adam22;Adra1d;Adrb2;Aff2;Agtr1a;Alox5;Amigo1;Apba2;Aqp1;Arhgef15;Atp1a2;Atp2b2;Atxn1;Bbs10;Bche;C1ql3;Cabp4;Cacna1b;Cacna1c;Cacna1g;Cacnb2;Cadps2;Cbln1;Cdh23;Cdhr1;Chrnb2;Clcn1;Cnga3;Cngb1;Cntn2;Col11a1;Col11a2;Cplx2;Ctnna2;Ctnnd2;Cxcr4;Cyp7b1;Dpp6;Dpysl2;Drd1a;Ednra;Ephb1;Eya4;Fabp7;Fgfr2;Fzd4;Gad1;Gal3st1;Gch1;Ghrl;Gjb2;Gjb4;Gjc3;Glrb;Gm11744;Gnal;Gng13;Grin2d;Grm4;Guca1b;Hoxa1;Hoxc10;…
Module1_esc	monovalent_inorganic_cation_transport	1.46487e-06	0.000192103	14143	184	2814	64	1.74815	Abcc8;Aqp1;Atp12a;Atp1a2;Atp6v1c2;Atp6v1g2;Cox4i2;Fxyd2;Hcn3;Kcna7;Kcnab1;Kcnab2;Kcnb1;Kcnc3;Kcnd1;Kcnf1;Kcng3;Kcnh1;Kcnh2;Kcnh3;Kcnh6;Kcnip2;Kcnip3;Kcnip4;Kcnj12;Kcnj14;Kcnj15;Kcnj3;Kcnj4;Kcnk10;Kcnk2;Kcnk6;Kcnk7;Kcnma1;Kcnmb4;Kcnn1;Kcnn2;Kcnn4;Kcnq2;Kcnq5;Kcns1;Kcnt2;Kcnu1;Scn3a;Scn4b;Scn5a;Scn8a;Scnn1a;Slc12a5;Slc12a8;Slc17a7;Slc1a1;Slc23a1;Slc24a5;Slc2a4;Slc34a3;Slc38a3;Slc38a9;Slc4a4;Slc5a3;…
Module1_esc	ion_homeostasis	1.56302e-06	0.000192103	14143	406	2814	120	1.4855	4930506M07Rik;Adam22;Adm;Adrb2;Ager;Agtr1a;Aifm3;Amigo1;Aqp11;Atp12a;Atp1a2;Atp2b2;Atp4a;Atp7a;Atp7b;Atxn1;Avpr1a;Bcl2;Bdkrb2;Best2;Cacna1c;Cacna1g;Cd38;Cd40;Cd52;Cdh23;Chrnb2;Cntf;Cntn2;Cxcl1;Cxcr2;Cxcr4;Cyp27b1;Dpp6;Drd1a;Ednra;Ephb6;Epor;F2;Fam38b;Fgfr4;Gal3st1;Galr2;Gck;Ghrl;Gipr;Gjc3;Glrb;Gm14511;Gm5635;Gpr3;Grin2d;Heph;Hfe;Hrc;Htr2a;Htr2b;Jph2;Kcnh2;Kcnk2;Kcnma1;Kcnmb4;Kcnn4;Kcnq2;Kdr;Kng1;…
Module1_esc	muscle_system_process	1.57617e-06	0.000192103	14143	98	2814	40	2.0514	Adora2b;Adrb2;Cacna1c;Cacna1g;Chrnb2;Cxcr4;Drd1a;Ednra;Fbxo32;Gata4;Hey2;Htr2b;Igf1;Kcnma1;Mybpc2;Myh11;Myl3;Myl4;Mylk;Myom1;Myom2;Nos3;P2rx2;P2rx3;Pde4b;Rgs2;Ryr1;Ryr2;Ryr3;Scn4b;Scn5a;Tbx20;Tnnc1;Tnnc2;Tnni2;Tnnt2;Tnnt3;Trim63;Tshz3;Ttn
Module1_esc	signal_transduction	3.09459e-06	0.000362662	14143	2105	2814	497	1.18665	5430435G22Rik;A630033H20Rik;A830018L16Rik;Abca1;Abl1;Acot11;Acvrl1;Adam11;Adam22;Adam4;Adamts2;Adcy2;Adcy7;Adcy9;Adcyap1r1;Adm2;Adora2b;Adra1d;Adrb2;Adrbk2;Ager;Agtr1a;Aipl1;Ak5;Akap5;Akr1c18;Angpt1;Angpt2;Angpt4;Angptl7;Ankdd1b;Aph1b;Aph1c;Apln;Areg;Arhgap22;Arhgap24;Arhgap30;Arhgap31;Arhgap6;Arhgef6;Arhgef9;Arl11;Artn;Asb16;Atp7a;Avpr1a;Baiap2l2;Bcl2;Bcl6;Bdkrb2;Bmp6;Bmp7;Bmp8a;Bmpr1b;Bmx;Boc;C…
Module1_esc	defense_response	3.69841e-06	0.000405911	14143	363	2814	108	1.49532	Afap1l2;Agtr1a;Alox5;Alox5ap;Aoc3;Bcl2;Bdkrb2;C1qb;C1ra;C1rl;C2;C3;C4b;C8g;Card9;Ccl12;Ccl17;Ccl20;Ccl8;Cd14;Cd300a;Cd40;Cela1;Cfb;Chst1;Chst2;Clec2d;Clec4n;Csf1r;Cxcl1;Cxcl5;Cxcr2;Cyp27b1;Cysltr1;Darc;Dhx58;Drd1a;F2;F8;Fcer1g;Fcgr3;Fgr;Gal;Gbp3;Gbp4;Gbp7;Gbp9;Gch1;H2-M3;Hdac9;Hyal1;Il12rb1;Il18;Il18rap;Il1r1;Il1rn;Il20rb;Il23a;Il27ra;Il28ra;Il34;Il6;Irf5;Irf8;Irgm2;Isg20;Itgb2;Kng1;Kynu;Ly96;Map…
Module1_esc	inflammatory_response	3.77671e-06	0.000405911	14143	181	2814	62	1.72159	Afap1l2;Agtr1a;Alox5;Alox5ap;Aoc3;Bdkrb2;C3;C4b;Ccl12;Ccl20;Ccl8;Cd14;Cd300a;Cd40;Cela1;Chst1;Chst2;Csf1r;Cxcl1;Cxcl5;Cysltr1;Darc;F2;F8;Fcer1g;Fcgr3;Gal;Hdac9;Hyal1;Il18;Il1rn;Il20rb;Il23a;Il34;Il6;Itgb2;Kng1;Ly96;Mecom;Ncf1;Nfkbid;Olr1;P2rx1;P2rx7;Prkcq;Prkd1;S1pr3;Serpinb9;Slc7a2;Tac1;Tbxa2r;Ticam1;Ticam2;Tlr2;Tlr3;Tlr4;Tlr5;Tnfrsf1b;Tnfrsf4;Tril;Trp73;Vnn1
Module1_esc	digestion	3.96678e-06	0.000405911	14143	26	2814	16	3.09289	Adm2;Aqp1;Aqp5;Cyp39a1;Cyp7b1;Gcnt3;Ghrl;Gpr39;Kcnma1;Kcnn4;Mogat2;P2rx7;Pgc;Rbp4;Tlr4;Trpc1
Module1_esc	sensory_perception	3.9965e-06	0.000405911	14143	208	2814	69	1.66726	Ace;Alox5;Aqp1;Atp2b2;Bbs10;Cabp4;Cacnb2;Cdh23;Cdhr1;Chrnb2;Cnga3;Cngb1;Col11a1;Col11a2;Ednra;Ephb1;Eya4;Fzd4;Gjb2;Gjb4;Gjc3;Glrb;Gm11744;Gnal;Gng13;Grin2d;Guca1b;Hoxa1;Htr2a;Il18;Irx5;Kcnip3;Kcnma1;Mak;Mip;Myo1a;Olfr31;Omp;Opn3;P2rx2;P2rx3;P2rx7;P2ry2;Pou3f4;Pou4f1;Pou4f2;Ppef2;Rab3a;Rbp4;Rdh12;Rgs9bp;Rom1;Rpgrip1;Sag;Scn3a;Scnn1a;Shank1;Six1;Snai2;Sobp;Tac1;Tas1r1;Tbx18;Tomt;Trpm1;Tshz3;Tub;Tul…
Module1_esc	regulation_of_system_process	5.51145e-06	0.000524838	14143	325	2814	98	1.51551	Adm;Adora2b;Adra1d;Adrb2;Alox5;Apln;Aqp1;Atp1a2;Atp2b2;Avpr1a;Bche;Cacna1b;Cacna1c;Cacna1g;Cacna2d2;Calcrl;Camk2a;Casq1;Cd38;Chrnb2;Cntn2;Cplx2;Cspg5;Ctnnd2;Ctss;Cysltr1;Drd1a;Fgf10;Foxn4;Gfap;Ghrl;Gnao1;Gpm6b;Gpr39;Grin2d;Hey2;Hrc;Hrh1;Htr2a;Igf1;Il6;Inha;Irx5;Jph3;Kcnc3;Kcnh2;Kcnma1;Kdr;Lama2;Lmcd1;Mapk8ip2;Myl3;Myl4;Napb;Nat8l;Ncf1;Neurod1;Nlgn3;Nos3;Nppc;Nr1h3;Nrxn1;Ophn1;P2rx1;P2rx3;P2ry2;Pa…
Module1_esc	synaptic_transmission	5.51192e-06	0.000524838	14143	202	2814	67	1.66702	Abat;Adrb2;Apba2;Arhgef15;Atp1a2;Atxn1;Bche;C1ql3;Cacna1b;Cacna1c;Cacna1g;Cacnb2;Cadps2;Cbln1;Chrnb2;Cplx2;Ctnna2;Dpysl2;Drd1a;Ephb1;Fgfr2;Gad1;Ghrl;Glrb;Grin2d;Grm4;Hrh1;Kcnma1;Lin7b;Lynx1;Maob;Mapk8ip2;Naalad2;Napb;Ncan;Nlgn3;Nrxn1;Ophn1;P2rx1;P2rx2;P2rx3;P2rx7;Park2;Plat;Rab3a;Rapsn;Reln;Rims1;Shank1;Slc12a5;Slc17a7;Slc18a2;Snap25;Snap91;Sncb;Sncg;Stx1b;Sv2a;Sv2c;Syn3;Syp;Syt1;Syt4;Tac1;Tmem90…
Module1_esc	renal_system_development	5.84067e-06	0.000539289	14143	131	2814	48	1.84157	Ace;Agtr1a;Angpt1;Angpt2;Aph1c;Aqp11;Bcl2;Bmp6;Bmp7;Clcnka;Emx2;Eya1;Fgf1;Fgf10;Fgf8;Foxc1;Foxc2;Foxd1;Gata3;Gcnt3;Gcnt4;Gdf11;Hoxa11;Hoxd11;Invs;Irx3;Itga8;Kif26b;Lrp4;Lrrk2;Mecom;Osr1;Osr2;Ovol1;Pax8;Pcsk5;Plce1;Pygo1;Rbp4;Ret;Robo2;Rpgrip1l;Six1;Six2;Sox4;Tenc1;Tshz3;Wnt4
Module1_esc	multicellular_organismal_signaling	9.32222e-06	0.000835435	14143	280	2814	86	1.54368	Abat;Adam22;Adrb2;Amigo1;Apba2;Arhgef15;Atp1a2;Atxn1;Bche;C1ql3;Cacna1b;Cacna1c;Cacna1g;Cacnb2;Cadps2;Cbln1;Chrnb2;Clcn1;Cntn2;Cplx2;Ctnna2;Cxcr4;Dpp6;Dpysl2;Drd1a;Ephb1;Fgfr2;Gad1;Gal3st1;Ghrl;Gjc3;Glrb;Grin2d;Grm4;Hrh1;Kcnh2;Kcnma1;Kcnmb4;Kcnq2;Lin7b;Lynx1;Mal;Maob;Mapk8ip2;Naalad2;Napb;Ncan;Nlgn3;Nrcam;Nrxn1;Ophn1;P2rx1;P2rx2;P2rx3;P2rx5;P2rx7;Park2;Plat;Rab3a;Rapsn;Reln;Rims1;Scn3a;Scn4b;Scn5…
Module3_esc	macromolecule_modification	1.13482e-12	3.60531e-09	14143	1615	3144	473	1.31749	2410016O06Rik;2610018G03Rik;Abi2;Adam10;Adar;Adarb1;Adck1;Adck5;Aga;Agtpbp1;Alg6;Alg9;Alkbh1;Alkbh2;Alkbh8;Anapc16;Anapc7;Apbb1;Asph;Ate1;Atf7ip;Atg5;Atg7;Atr;B230120H23Rik;B3galnt1;B3gnt5;B4galt1;Bard1;Baz2a;Bcr;Birc6;Bmi1;Bmp4;Bmpr1a;Braf;Brca2;Brcc3;Brpf1;Brpf3;Brsk1;Btg1;Btg2;Camk1;Camk1d;Camk2b;Camk2g;Cask;Ccdc101;Ccnt1;Cdc14b;Cdc25b;Cdc25c;Cdc27;Cdc42bpa;Cdc7;Cdc73;Cdk10;Cdk12;Cdk13;Cdk17;C…
Module3_esc	cellular_protein_modification_process	5.9019e-11	6.25011e-08	14143	1541	3144	445	1.29902	2410016O06Rik;2610018G03Rik;Abi2;Adam10;Adck1;Adck5;Aga;Agtpbp1;Alg6;Alg9;Anapc16;Anapc7;Apbb1;Asph;Ate1;Atg5;Atg7;Atr;B230120H23Rik;B3galnt1;B3gnt5;B4galt1;Bard1;Baz2a;Bcr;Birc6;Bmi1;Bmp4;Bmpr1a;Braf;Brca2;Brcc3;Brpf1;Brpf3;Brsk1;Btg1;Btg2;Camk1;Camk1d;Camk2b;Camk2g;Cask;Ccdc101;Ccnt1;Cdc14b;Cdc25b;Cdc25c;Cdc27;Cdc42bpa;Cdc7;Cdc73;Cdk10;Cdk12;Cdk13;Cdk17;Cdk18;Cdk5;Cdk7;Chek2;Cit;Clip3;Clk3;Clsp…
Module3_esc	protein_modification_process	5.9019e-11	6.25011e-08	14143	1541	3144	445	1.29902	2410016O06Rik;2610018G03Rik;Abi2;Adam10;Adck1;Adck5;Aga;Agtpbp1;Alg6;Alg9;Anapc16;Anapc7;Apbb1;Asph;Ate1;Atg5;Atg7;Atr;B230120H23Rik;B3galnt1;B3gnt5;B4galt1;Bard1;Baz2a;Bcr;Birc6;Bmi1;Bmp4;Bmpr1a;Braf;Brca2;Brcc3;Brpf1;Brpf3;Brsk1;Btg1;Btg2;Camk1;Camk1d;Camk2b;Camk2g;Cask;Ccdc101;Ccnt1;Cdc14b;Cdc25b;Cdc25c;Cdc27;Cdc42bpa;Cdc7;Cdc73;Cdk10;Cdk12;Cdk13;Cdk17;Cdk18;Cdk5;Cdk7;Chek2;Cit;Clip3;Clk3;Clsp…
Module3_esc	protein_ubiquitination	1.06759e-06	0.000569364	14143	262	3144	92	1.57959	Anapc16;Anapc7;Bard1;Birc6;Bmi1;Cdc27;Cdc73;Crbn;Ddb2;Ercc8;Fbxl3;Fbxl5;Fbxo2;Fbxo25;Fbxo30;Fbxw7;Fem1b;G2e3;Hace1;Herc2;Herc3;Itch;Kctd13;Kdm2b;Klhl12;Klhl20;Klhl21;Klhl7;Klhl9;Leo1;Ltn1;March2;March6;March8;Mib1;Mib2;Mul1;Pcgf1;Peli1;Pja2;Rchy1;Ring1;Rlim;Rnf11;Rnf111;Rnf115;Rnf128;Rnf130;Rnf146;Rnf167;Rnf168;Rnf20;Rnf213;Rnf216;Rnf31;Rnf6;Rnf8;Sharpin;Siah1a;Siah2;Smurf2;Syvn1;Tnfaip1;Tnks;Tra…
Module3_esc	organelle_organization	1.12995e-06	0.000569364	14143	1486	3144	404	1.22299	2210018M11Rik;2410016O06Rik;2810021B07Rik;5730419I09Rik;Aars2;Abcd3;Acd;Acot8;Agtpbp1;Aifm2;Aktip;Als2;Amot;Anapc16;Anapc7;Apbb1;Apc;Arc;Arhgap17;Arhgef18;Arhgef5;Arid2;Aspm;Atg12;Atg13;Atg5;Atg7;Atg9a;Atl3;B230120H23Rik;Bahd1;Baz2a;Bbc3;Bcr;Bcs1l;Bet1;Bicd2;Birc6;Blm;Blzf1;Bmi1;Brca2;Brcc3;Brpf1;Brpf3;Brsk1;Brwd1;Camsap1;Camsap3;Capn10;Casc5;Casp7;Cav2;Cbx2;Ccdc101;Ccdc88c;Ccdc99;Ccl2;Ccnb1ip1;C…
Module3_esc	phosphate-containing_compound_metabolic_process	1.2545e-06	0.000569364	14143	1036	3144	293	1.27223	2610018G03Rik;2810408M09Rik;Abi2;Adam10;Adck1;Adck4;Adck5;Agk;Akap8l;Aldoc;Atr;B230120H23Rik;Bcr;Bmp4;Bmpr1a;Braf;Brsk1;Camk1;Camk1d;Camk2b;Camk2g;Cask;Ccnt1;Cdc14b;Cdc25b;Cdc25c;Cdc42bpa;Cdc7;Cdk10;Cdk12;Cdk13;Cdk17;Cdk18;Cdk5;Cdk7;Cdkn2d;Chek2;Chkb;Cit;Ckmt1;Clk3;Clp1;Clspn;Cpne3;Creb1;Csnk1g3;D8Ertd82e;Dapk1;Dck;Dclk2;Dgkd;Dgkz;Dguok;Dusp11;Dusp16;Dusp22;Dusp27;Dusp3;Dusp6;Dusp7;Dyrk1a;Dyrk2;E…
Module3_esc	phosphorus_metabolic_process	1.2545e-06	0.000569364	14143	1036	3144	293	1.27223	2610018G03Rik;2810408M09Rik;Abi2;Adam10;Adck1;Adck4;Adck5;Agk;Akap8l;Aldoc;Atr;B230120H23Rik;Bcr;Bmp4;Bmpr1a;Braf;Brsk1;Camk1;Camk1d;Camk2b;Camk2g;Cask;Ccnt1;Cdc14b;Cdc25b;Cdc25c;Cdc42bpa;Cdc7;Cdk10;Cdk12;Cdk13;Cdk17;Cdk18;Cdk5;Cdk7;Cdkn2d;Chek2;Chkb;Cit;Ckmt1;Clk3;Clp1;Clspn;Cpne3;Creb1;Csnk1g3;D8Ertd82e;Dapk1;Dck;Dclk2;Dgkd;Dgkz;Dguok;Dusp11;Dusp16;Dusp22;Dusp27;Dusp3;Dusp6;Dusp7;Dyrk1a;Dyrk2;E…
Module3_esc	cell_cycle	1.79559e-06	0.000713072	14143	781	3144	228	1.31324	2410076I21Rik;2810021B07Rik;4632434I11Rik;Adam17;Anapc16;Anapc7;Ank3;Ankrd54;Apbb1;Apc;Apex2;Appl1;Appl2;Aspm;B230120H23Rik;Birc6;Brca2;Brsk1;Camk1;Camk2b;Camk2g;Casc5;Casp8ap2;Ccdc99;Ccnb1ip1;Ccnt1;Ccny;Ccpg1;Cdc25b;Cdc25c;Cdc27;Cdc7;Cdc73;Cdk5;Cdk5rap2;Cdk7;Cdkn1b;Cdkn2d;Cenpc1;Cenpe;Cenpw;Cep120;Cep164;Cep192;Cep250;Cep63;Cep72;Cgref1;Cgrrf1;Chek2;Cit;Clasp1;Clasp2;Clgn;Clspn;Cntrob;Commd5;Cro…
Module4_esc	cellular_metabolic_process	3.33042e-34	9.63825e-31	14143	5514	2555	1270	1.27493	0610007P22Rik;2410022L05Rik;2610301G19Rik;2810405K02Rik;9430023L20Rik;AI314976;AI462493;Abcb1a;Abcg2;Abhd5;Abi1;Abl2;Abt1;Acaa1a;Acaa2;Acadm;Acads;Acadvl;Aco1;Acot9;Acp1;Acsl1;Acsl3;Acsl5;Actr8;Acy1;Ada;Adam9;Adi1;Adipor2;Adpgk;Adrbk1;Aebp1;Aff4;Afg3l1;Afg3l2;Agap3;Agpat1;Agpat2;Agpat3;Agpat4;Agpat6;Agrn;Ahcyl1;Aifm1;Aimp2;Aip;Aire;Ak1;Ak3;Ak4;Akap2;Akap8;Akirin2;Akr1b8;Akt2;Alad;Aldh9a1;Alkbh3;A…
Module4_esc	metabolic_process	5.81694e-28	8.41711e-25	14143	6288	2555	1385	1.21924	0610007P14Rik;0610007P22Rik;2410022L05Rik;2610301G19Rik;2810405K02Rik;4833439L19Rik;9430023L20Rik;AI314976;AI462493;Aasdhppt;Abcb1a;Abcg2;Abhd4;Abhd5;Abi1;Abl2;Abt1;Acaa1a;Acaa2;Acad9;Acadm;Acads;Acadvl;Acat1;Aco1;Acot9;Acp1;Acsl1;Acsl3;Acsl5;Actr8;Acy1;Ada;Adam15;Adam9;Adi1;Adipor2;Adpgk;Adrbk1;Aebp1;Aff4;Afg3l1;Afg3l2;Agap3;Agpat1;Agpat2;Agpat3;Agpat4;Agpat6;Agrn;Ahcyl1;Aifm1;Aimp2;Aip;Aire;Ak1…
Module4_esc	primary_metabolic_process	5.65693e-27	5.45706e-24	14143	5545	2555	1243	1.24085	0610007P14Rik;0610007P22Rik;2410022L05Rik;2610301G19Rik;2810405K02Rik;AI314976;Abcb1a;Abhd4;Abhd5;Abi1;Abl2;Abt1;Acaa1a;Acaa2;Acadm;Acads;Acadvl;Acp1;Acsl1;Acsl3;Acsl5;Actr8;Acy1;Ada;Adam15;Adam9;Adi1;Adipor2;Adpgk;Adrbk1;Aebp1;Aff4;Afg3l1;Afg3l2;Agap3;Agpat1;Agpat2;Agpat3;Agpat4;Agpat6;Ahcyl1;Aifm1;Aimp2;Aip;Aire;Ak1;Ak3;Ak4;Akap8;Akirin2;Akr1b8;Akt2;Aldh9a1;Alkbh3;Amfr;Ampd2;Amz2;Anapc1;Anapc11…
Module4_esc	cellular_macromolecule_metabolic_process	3.75156e-26	2.71425e-23	14143	4112	2555	966	1.30039	0610007P22Rik;2410022L05Rik;2610301G19Rik;Abi1;Abl2;Abt1;Acadm;Acp1;Actr8;Adam9;Adrbk1;Aebp1;Aff4;Afg3l1;Afg3l2;Agap3;Agrn;Ahcyl1;Aifm1;Aimp2;Aip;Aire;Akap8;Akirin2;Akt2;Alkbh3;Amfr;Anapc1;Anapc11;Anapc2;Anapc4;Aph1a;Apitd1;Apoa2;Aqr;Araf;Arid1a;Arih1;Arih2;Arl6;Arnt;Arntl;Arrb2;Asf1a;Asf1b;Asl;Asxl1;Atad2;Atf1;Atf6b;Atg3;Atrx;Atxn7l3;Aurka;Aurkb;Axin1;Axl;B3gnt2;B3gnt7;Bap1;Baz1a;Baz1b;Bckdk;Bcl…
Module4_esc	cellular_process	2.00418e-23	1.16002e-20	14143	8865	2555	1818	1.13518	0610007P22Rik;0610031J06Rik;1500003O03Rik;1700019N12Rik;2310016M24Rik;2410003K15Rik;2410022L05Rik;2610301G19Rik;2810002N01Rik;2810405K02Rik;2810407C02Rik;3200002M19Rik;4930453N24Rik;9430023L20Rik;AI314976;AI462493;Abcb1a;Abcg2;Abhd5;Abi1;Abl2;Abr;Abt1;Acaa1a;Acaa2;Acadm;Acads;Acadvl;Aco1;Acot9;Acp1;Acsl1;Acsl3;Acsl5;Acta1;Actr10;Actr8;Acy1;Ada;Adam15;Adam9;Adi1;Adipor2;Adpgk;Adrbk1;Aebp1;Aff4;Afg…
Module4_esc	nitrogen_compound_metabolic_process	2.31443e-22	1.11633e-19	14143	3074	2555	743	1.33794	0610007P22Rik;2410022L05Rik;2610301G19Rik;AI314976;Abcb1a;Abcg2;Abt1;Acadm;Actr8;Ada;Aebp1;Aff4;Agpat6;Ahcyl1;Aifm1;Aire;Ak1;Ak3;Ak4;Akap8;Akirin2;Akr1b8;Alad;Aldh9a1;Alkbh3;Amd1;Ampd2;Apitd1;Apoa2;Aqr;Arf6;Arfrp1;Arid1a;Arl2;Arl4a;Arnt;Arntl;Arrb2;Asf1a;Asf1b;Asl;Asxl1;Atad1;Atad2;Atf1;Atf6b;Atp1b1;Atp6v1a;Atp6v1c1;Atrx;Atxn7l3;Axin1;Azin1;Bad;Baz1a;Baz1b;Bcl3;Bcor;Bnip3;Bptf;Brca1;Brd7;Brd8;Bre…
Module4_esc	macromolecule_metabolic_process	3.01474e-22	1.18579e-19	14143	4465	2555	1015	1.25833	0610007P22Rik;2410022L05Rik;2610301G19Rik;Aasdhppt;Abi1;Abl2;Abt1;Acadm;Acp1;Actr8;Acy1;Adam15;Adam9;Adrbk1;Aebp1;Aff4;Afg3l1;Afg3l2;Agap3;Agrn;Ahcyl1;Aifm1;Aimp2;Aip;Aire;Akap8;Akirin2;Akt2;Alkbh3;Amfr;Amz2;Anapc1;Anapc11;Anapc2;Anapc4;Aph1a;Apitd1;Apoa2;Aqr;Araf;Arid1a;Arih1;Arih2;Arl6;Arnt;Arntl;Arrb2;Asf1a;Asf1b;Asl;Asxl1;Atad2;Atf1;Atf6b;Atg3;Atg4b;Atp6ap2;Atrx;Atxn7l3;Aurka;Aurkb;Axin1;Axl;…
Module4_esc	cellular_nitrogen_compound_metabolic_process	3.27793e-22	1.18579e-19	14143	2988	2555	725	1.3431	0610007P22Rik;2410022L05Rik;2610301G19Rik;AI314976;Abcb1a;Abcg2;Abt1;Acadm;Actr8;Ada;Aebp1;Aff4;Agpat6;Ahcyl1;Aifm1;Aire;Ak1;Ak3;Ak4;Akap8;Akirin2;Alad;Aldh9a1;Alkbh3;Amd1;Ampd2;Apitd1;Apoa2;Aqr;Arf6;Arfrp1;Arid1a;Arl2;Arl4a;Arnt;Arntl;Arrb2;Asf1a;Asf1b;Asl;Asxl1;Atad1;Atad2;Atf1;Atf6b;Atp1b1;Atp6v1a;Atp6v1c1;Atrx;Atxn7l3;Axin1;Azin1;Bad;Baz1a;Baz1b;Bcl3;Bcor;Bnip3;Bptf;Brca1;Brd7;Brd8;Bre;Brms1;…
Module4_esc	nucleobase-containing_compound_metabolic_process	2.11684e-21	6.80681e-19	14143	2863	2555	696	1.34567	0610007P22Rik;2410022L05Rik;2610301G19Rik;AI314976;Abcb1a;Abt1;Actr8;Ada;Aebp1;Aff4;Ahcyl1;Aifm1;Aire;Ak1;Ak3;Ak4;Akap8;Akirin2;Alkbh3;Ampd2;Apitd1;Aqr;Arf6;Arfrp1;Arid1a;Arl2;Arl4a;Arnt;Arntl;Arrb2;Asf1a;Asf1b;Asxl1;Atad1;Atad2;Atf1;Atf6b;Atp1b1;Atp6v1a;Atp6v1c1;Atrx;Atxn7l3;Axin1;Bad;Baz1a;Baz1b;Bcl3;Bcor;Bnip3;Bptf;Brca1;Brd7;Brd8;Bre;Brms1;C1d;C77370;C80913;Cand1;Casc3;Casp3;Cc2d1b;Ccar1;Ccdc…
Module4_esc	nucleic_acid_metabolic_process	7.71951e-21	2.23403e-18	14143	2400	2555	599	1.38155	0610007P22Rik;2410022L05Rik;2610301G19Rik;Abt1;Actr8;Aebp1;Aff4;Ahcyl1;Aifm1;Aire;Akap8;Akirin2;Alkbh3;Apitd1;Aqr;Arid1a;Arnt;Arntl;Arrb2;Asf1a;Asf1b;Asxl1;Atad2;Atf1;Atf6b;Atrx;Atxn7l3;Baz1a;Baz1b;Bcl3;Bcor;Bnip3;Bptf;Brca1;Brd7;Brd8;Bre;Brms1;C1d;C77370;C80913;Cand1;Casc3;Casp3;Cc2d1b;Ccar1;Ccdc59;Ccne2;Ccnh;Ccnk;Ccnl1;Ccnl2;Cd3eap;Cdc45;Cdc6;Cdca5;Cdca7l;Cdk2;Cdk8;Cdyl;Cebpz;Cetn2;Cggbp1;Chaf1…
Module4_esc	organelle_organization	1.1517e-20	3.03001e-18	14143	1486	2555	405	1.50864	1500003O03Rik;2310016M24Rik;2410022L05Rik;3200002M19Rik;Abl2;Abr;Acta1;Actr8;Afg3l1;Afg3l2;Agap3;Aifm1;Aip;Akap2;Akap8;Anapc1;Anapc11;Anapc2;Anapc4;Ap1b1;Ap1g1;Ap1m1;Ap2b1;Ap3b1;Apitd1;Arf6;Arfip2;Arhgap21;Arhgef2;Arid1a;Arl2;Arl8a;Arl8b;Asf1a;Asf1b;Asxl1;Atg16l1;Atg3;Atg4b;Atl2;Atxn7l3;Aurka;Aurkb;Axin1;Bad;Baiap2;Bap1;Baz1a;Baz1b;Bbs2;Bcar1;Bcl2l1;Bcor;Becn1;Bid;Bnip1;Bnip3;Bod1;Bptf;Brca1;Brd1…
Module4_esc	cellular_component_organization_or_biogenesis_at_cellular_level	3.74019e-19	9.02009e-17	14143	2243	2555	559	1.37954	0610007P22Rik;1500003O03Rik;2310016M24Rik;2410003K15Rik;2410022L05Rik;3200002M19Rik;Abl2;Abr;Acta1;Actr8;Afg3l1;Afg3l2;Agap3;Agrn;Aifm1;Aip;Akap2;Akap8;Anapc1;Anapc11;Anapc2;Anapc4;Ap1b1;Ap1g1;Ap1m1;Ap2b1;Ap3b1;Apitd1;Arf6;Arfip2;Arhgap21;Arhgef2;Arid1a;Arl2;Arl3;Arl6;Arl8a;Arl8b;Asap1;Asf1a;Asf1b;Asxl1;Atf1;Atg16l1;Atg3;Atg4b;Atl2;Atxn2;Atxn7l3;Aurka;Aurkb;Axin1;B3gnt2;B9d1;Bad;Baiap2;Bap1;Baz1a…
Module4_esc	RNA_metabolic_process	2.63511e-18	5.86615e-16	14143	2006	2555	506	1.39627	0610007P22Rik;2410022L05Rik;2610301G19Rik;Abt1;Actr8;Aebp1;Aff4;Ahcyl1;Aire;Akirin2;Apitd1;Aqr;Arid1a;Arnt;Arntl;Arrb2;Asf1a;Asf1b;Asxl1;Atad2;Atf1;Atf6b;Atxn7l3;Baz1a;Baz1b;Bcl3;Bcor;Bptf;Brd7;Brd8;Brms1;C1d;C77370;C80913;Cand1;Casc3;Cc2d1b;Ccar1;Ccdc59;Ccnh;Ccnk;Ccnl1;Ccnl2;Cd3eap;Cdca7l;Cdk8;Cdyl;Cebpz;Cggbp1;Chaf1a;Chd1;Cherp;Cic;Cnot1;Cnot2;Cnot3;Cnot6;Cnot7;Cnot8;Cobra1;Cpsf1;Cpsf2;Cpsf3;Cp…
Module4_esc	cellular_component_organization_or_biogenesis	2.9952e-17	6.1915e-15	14143	2691	2555	641	1.31855	0610007P22Rik;1500003O03Rik;2310016M24Rik;2410003K15Rik;2410022L05Rik;3200002M19Rik;Abl2;Abr;Acadm;Acads;Acat1;Acta1;Actr8;Adam15;Afg3l1;Afg3l2;Agap3;Agrn;Aifm1;Aip;Ak3;Akap2;Akap8;Akt2;Alad;Amfr;Anapc1;Anapc11;Anapc2;Anapc4;Ap1b1;Ap1g1;Ap1m1;Ap2b1;Ap3b1;Ap3d1;Apitd1;Apoa2;Arf6;Arfip2;Arhgap21;Arhgef2;Arid1a;Arl2;Arl3;Arl6;Arl8a;Arl8b;Arpc5l;Asap1;Asf1a;Asf1b;Asxl1;Atf1;Atg16l1;Atg3;Atg4b;Atl2;At…
Module4_esc	RNA_processing	8.0969e-16	1.56216e-13	14143	478	2555	158	1.8297	0610007P22Rik;2610301G19Rik;Ahcyl1;Aqr;C1d;Casc3;Ccnl1;Ccnl2;Cherp;Cnot7;Cpsf1;Cpsf2;Cpsf3;Cpsf4;Cpsf6;Cpsf7;Crnkl1;Cstf1;Cstf2;Ctu2;Cwc22;Ddx20;Ddx41;Ddx46;Ddx47;Ddx56;Dhx38;Dhx8;Dimt1;Dis3;Drosha;Dus1l;Dus3l;Elac2;Exosc1;Exosc2;Exosc5;Exosc9;Fam103a1;Fip1l1;Frg1;Gemin5;Gemin6;Gemin7;Imp4;Ints1;Ints10;Ints3;Ints4;Ints7;Ints8;Jmjd6;Khdrbs3;Khsrp;Krr1;Larp7;Las1l;Lsm3;Lsm6;Luc7l3;Magohb;Mettl1;Mov…
Module4_esc	gene_expression	1.18443e-13	2.14233e-11	14143	2319	2555	547	1.30568	0610007P22Rik;2410022L05Rik;2610301G19Rik;Abt1;Actr8;Aebp1;Aff4;Afg3l1;Afg3l2;Ahcyl1;Aimp2;Aip;Aire;Akirin2;Aph1a;Apitd1;Aqr;Arid1a;Arnt;Arntl;Arrb2;Asf1a;Asf1b;Asxl1;Atad2;Atf1;Atf6b;Atp6ap2;Atxn7l3;B3gnt2;B3gnt7;Baz1a;Baz1b;Bcl3;Bcor;Bptf;Brd7;Brd8;Brms1;C1d;C80913;Cand1;Capn1;Capn2;Casc3;Casp3;Cc2d1b;Ccar1;Ccdc59;Ccnh;Ccnk;Ccnl1;Ccnl2;Cd3eap;Cdca7l;Cdk8;Cdyl;Cebpz;Cggbp1;Chaf1a;Chd1;Cherp;Cic;…
Module4_esc	cellular_component_organization_at_cellular_level	3.52441e-13	5.99979e-11	14143	2124	2555	505	1.3161	1500003O03Rik;2310016M24Rik;2410022L05Rik;3200002M19Rik;Abl2;Abr;Acta1;Actr8;Afg3l1;Afg3l2;Agap3;Agrn;Aifm1;Aip;Akap2;Akap8;Anapc1;Anapc11;Anapc2;Anapc4;Ap1b1;Ap1g1;Ap1m1;Ap2b1;Ap3b1;Apitd1;Arf6;Arfip2;Arhgap21;Arhgef2;Arid1a;Arl2;Arl3;Arl6;Arl8a;Arl8b;Asap1;Asf1a;Asf1b;Asxl1;Atf1;Atg16l1;Atg3;Atg4b;Atl2;Atxn2;Atxn7l3;Aurka;Aurkb;Axin1;B3gnt2;B9d1;Bad;Baiap2;Bap1;Baz1a;Baz1b;Bbs2;Bcar1;Bcl2l1;Bcl…
Module4_esc	cell_cycle	6.05345e-13	9.7326e-11	14143	781	2555	220	1.55927	3200002M19Rik;Abcb1a;Actr8;Ak1;Akap8;Anapc1;Anapc11;Anapc2;Anapc4;Anxa11;Apitd1;Arhgef2;Arl2;Arl3;Arl8a;Arl8b;Aurka;Aurkb;Bcl2l1;Becn1;Bin3;Bod1;Brca1;Brd4;Brd7;Bub1;Bub1b;C77370;Cast;Ccar1;Ccnd2;Ccndbp1;Ccne2;Ccnf;Ccnh;Ccnk;Cd2ap;Cdc123;Cdc23;Cdc25a;Cdc26;Cdc45;Cdc6;Cdca2;Cdca5;Cdk11b;Cdk2;Cdkn1a;Cdkn1c;Cdkn3;Cenpf;Cenph;Cenpt;Cep110;Cep55;Cetn2;Chaf1a;Chek1;Chfr;Chmp3;Chtf18;Chtf8;Cib1;Cinp;Cka…
Module4_esc	cellular_response_to_stress	1.6686e-12	2.54154e-10	14143	704	2555	201	1.58043	Actr8;Agap3;Aifm1;Alkbh3;Amfr;Apitd1;Arnt;Asf1a;Atg16l1;Atg3;Atg4b;Atrx;Axin1;Axl;Baz1b;Bcl10;Bcl3;Becn1;Bnip3;Brca1;Bre;C77370;Casp3;Cat;Cav1;Cbs;Ccs;Cdc42ep5;Cdca5;Cdk2;Cdkn1a;Cetn2;Chaf1a;Chchd6;Chd1l;Chek1;Cib1;Cinp;Coq7;Cry1;Cryab;Cul4a;Dab2ip;Dap;Derl1;Dna2;Dnajc10;Dtl;E2f1;Ect2;Eif2b1;Eif2b3;Eif2b4;Epas1;Epc2;Ercc1;Ercc3;Ero1l;Etv5;Eya3;Fads1;Fanca;Fancl;Fbxo22;Fbxo6;Fen1;Foxm1;Foxo3;Foxo4…
Module4_esc	macromolecule_localization	2.93454e-12	4.24629e-10	14143	1145	2555	297	1.43583	1500003O03Rik;Acsl1;Acsl5;Agap3;Agrn;Ahcyl1;Aip;Akap2;Akap7;Akt2;Ap1b1;Ap1g1;Ap1m1;Ap2a2;Ap2b1;Ap3b1;Ap3d1;Ap3m1;Apoa2;Arf3;Arf6;Arfgap2;Arfip1;Arfrp1;Arl2;Arl2bp;Arl3;Arntl;Arrb2;Atg16l1;Atg3;Atg4b;Atp11a;Atp9a;Aurkb;Bbs2;Bcap29;Bcl3;Bid;Bin3;Bnip1;Bscl2;Bub1b;Casc3;Cav1;Cby1;Cenpf;Cep57;Chchd4;Chmp2b;Chmp3;Chmp5;Chmp6;Chmp7;Cope;Copg2;Crb3;Cript;Crot;Csnk1e;Ctdnep1;Cuta;Dag1;Ddx19a;Ddx42;Derl1;…
Module4_esc	intracellular_transport	3.50978e-12	4.83681e-10	14143	604	2555	177	1.62213	1500003O03Rik;Agap3;Ahcyl1;Aip;Ankrd27;Ap1b1;Ap1g1;Ap1m1;Ap2a2;Ap2b1;Ap3b1;Ap3d1;Ap3m1;Arfip1;Arfrp1;Arhgap21;Arl3;Arntl;Axin1;Bad;Bbs2;Bcap29;Bcl2l1;Bcl3;Bid;Bnip3;Ccdc64;Ccs;Cep57;Chmp3;Chmp5;Chmp7;Cope;Copg2;D6Wsu116e;Dag1;Derl1;Dst;Dynll2;Ehd4;Ergic1;Exoc4;Fam53a;Fbxo22;Fxc1;Fyttd1;Gas6;Gga1;Gga2;Golga4;Golga7;Hap1;Hdac6;Hgs;Hif1a;Hook1;Ift46;Ing1;Ipo13;Ipo9;Jun;Kif13a;Kif5b;Klc2;Kpna1;Kpna3;…
Module4_esc	cellular_component_organization	6.53856e-12	8.60117e-10	14143	2565	2555	586	1.26462	1500003O03Rik;2310016M24Rik;2410022L05Rik;3200002M19Rik;Abl2;Abr;Acadm;Acads;Acat1;Acta1;Actr8;Adam15;Afg3l1;Afg3l2;Agap3;Agrn;Aifm1;Aip;Ak3;Akap2;Akap8;Akt2;Alad;Amfr;Anapc1;Anapc11;Anapc2;Anapc4;Ap1b1;Ap1g1;Ap1m1;Ap2b1;Ap3b1;Ap3d1;Apitd1;Apoa2;Arf6;Arfip2;Arhgap21;Arhgef2;Arid1a;Arl2;Arl3;Arl6;Arl8a;Arl8b;Arpc5l;Asap1;Asf1a;Asf1b;Asxl1;Atf1;Atg16l1;Atg3;Atg4b;Atl2;Atxn2;Atxn7l3;Aurka;Aurkb;Axin…
Module4_esc	cellular_component_biogenesis_at_cellular_level	8.04822e-12	1.01268e-09	14143	212	2555	80	2.08884	0610007P22Rik;2410003K15Rik;Atxn2;Brix1;C1d;Cirbp;Cnot7;Crnkl1;Ddx47;Ddx56;Ddx6;Dimt1;Dis3;Drosha;Dync1h1;Exoc4;Exosc1;Exosc2;Exosc5;Exosc9;Fam103a1;Frg1;Gemin6;Gnl1;Gnl3l;Grb7;Gtpbp10;Gtpbp4;Imp4;Ipo9;Isg20l2;Krr1;Las1l;Lsg1;Lsm6;Mina;Mphosph10;Mphosph6;Mrpl10;Mtg1;Naf1;Nip7;Nol9;Oxa1l;Pdcd11;Pex19;Pin4;Polr1b;Pop4;Pop5;Pqbp1;Prmt7;Prpf6;Rbfa;Rbm5;Rcl1;Rpl5;Rrn3;Rrp1b;Rrp36;Rrp8;Scaf11;Sdad1;Shq…
Module4_esc	cell_division	9.34546e-12	1.12691e-09	14143	357	2555	117	1.81413	3200002M19Rik;Actr8;Anapc1;Anapc11;Anapc2;Anapc4;Anxa11;Apitd1;Arhgef2;Arl3;Arl8a;Arl8b;Aurka;Aurkb;Bcl2l1;Becn1;Bin3;Bod1;Bub1;Bub1b;Ccnd2;Ccne2;Ccnf;Ccnk;Cd2ap;Cdc123;Cdc23;Cdc26;Cdc45;Cdc6;Cdca2;Cdca5;Cdk11b;Cdk2;Cenph;Cenpt;Cep110;Cep55;Cetn2;Chfr;Chmp3;Cinp;Ckap2;Ckap5;Daxx;Dync1li1;Dynlt3;Ect2;Etv5;Fgfr1;Fsd1;Fzr1;Haus4;Haus5;Haus7;Haus8;Hmga2;Jtb;Kif11;Kif13a;Kif20a;Kif23;Kif2a;Kif2c;Kit;K…
Module4_esc	protein_localization	1.20987e-11	1.40055e-09	14143	995	2555	262	1.45757	1500003O03Rik;Agap3;Agrn;Ahcyl1;Aip;Akap2;Akap7;Akt2;Ap1b1;Ap1g1;Ap1m1;Ap2a2;Ap2b1;Ap3b1;Ap3d1;Ap3m1;Arf3;Arf6;Arfgap2;Arfip1;Arfrp1;Arl2;Arl2bp;Arl3;Arntl;Arrb2;Atg16l1;Atg3;Atg4b;Aurkb;Bbs2;Bcap29;Bcl3;Bid;Bin3;Bnip1;Bub1b;Cav1;Cby1;Cenpf;Cep57;Chchd4;Chmp2b;Chmp3;Chmp5;Chmp6;Chmp7;Cope;Copg2;Crb3;Cript;Csnk1e;Ctdnep1;Cuta;Dag1;Ddx19a;Ddx42;Derl1;Diap1;Dlg1;Dnaja3;Dnm2;Dvl1;Ect2;Eif4enif1;Eps15…
Module4_esc	mitotic_cell_cycle	2.09914e-11	2.3365e-09	14143	361	2555	117	1.79403	3200002M19Rik;Abcb1a;Actr8;Akap8;Anapc1;Anapc11;Anapc2;Anapc4;Apitd1;Arhgef2;Arl8a;Arl8b;Aurka;Aurkb;Bcl2l1;Bod1;Brd4;Bub1;Bub1b;C77370;Ccnd2;Ccnf;Ccnk;Cd2ap;Cdc123;Cdc23;Cdc25a;Cdc26;Cdc6;Cdca2;Cdca5;Cdk2;Cdkn1a;Cenpf;Cenph;Cenpt;Cep55;Cetn2;Chek1;Chfr;Cib1;Ckap5;Dlgap5;Dync1li1;Dynlt3;E2f1;E2f5;E2f6;Espl1;Foxm1;Foxo4;Fsd1;Fzr1;Gigyf2;Haus4;Haus5;Haus7;Haus8;Hmga2;Jtb;Katna1;Kif11;Kif23;Kif2a;Ki…
Module4_esc	ribonucleoprotein_complex_biogenesis	3.87297e-11	4.15125e-09	14143	199	2555	75	2.08621	0610007P22Rik;2410003K15Rik;Atxn2;Brix1;C1d;Cirbp;Cnot7;Crnkl1;Ddx47;Ddx56;Ddx6;Dimt1;Dis3;Drosha;Dync1h1;Exosc1;Exosc2;Exosc5;Exosc9;Fam103a1;Frg1;Gemin6;Gnl1;Gnl3l;Grb7;Gtpbp10;Gtpbp4;Imp4;Ipo9;Isg20l2;Krr1;Las1l;Lsg1;Lsm6;Mina;Mphosph10;Mphosph6;Mrpl10;Mtg1;Naf1;Nip7;Nol9;Pdcd11;Pin4;Pop4;Pop5;Pqbp1;Prmt7;Prpf6;Rbfa;Rbm5;Rcl1;Rpl5;Rrn3;Rrp1b;Rrp36;Rrp8;Scaf11;Sdad1;Shq1;Sip1;Sirt1;Skiv2l2;Tbl3…
Module4_esc	M_phase_of_mitotic_cell_cycle	4.38865e-11	4.53599e-09	14143	245	2555	87	1.96564	3200002M19Rik;Actr8;Akap8;Anapc1;Anapc11;Anapc2;Anapc4;Apitd1;Arhgef2;Arl8a;Arl8b;Aurka;Aurkb;Bod1;Bub1;Bub1b;Ccnf;Ccnk;Cd2ap;Cdc23;Cdc26;Cdc6;Cdca2;Cdca5;Cdk2;Cenpf;Cenph;Cenpt;Cep55;Cetn2;Chfr;Ckap5;Dlgap5;Dync1li1;Dynlt3;Espl1;Fsd1;Fzr1;Haus4;Haus5;Haus7;Haus8;Hmga2;Jtb;Kif11;Kif23;Kif2a;Kif2c;Mad2l2;Map2k1;Mapre1;Mapre2;Mcmbp;Mis18bp1;Ncapg;Ncaph;Ndc80;Nde1;Nek2;Nek9;Nsmce2;Nuf2;Nup37;Nusap1;…
Module4_esc	cellular_localization	4.91649e-11	4.90632e-09	14143	1012	2555	263	1.43855	1500003O03Rik;Agap3;Agrn;Ahcyl1;Aip;Akt2;Ankrd27;Anxa3;Ap1b1;Ap1g1;Ap1m1;Ap2a2;Ap2b1;Ap3b1;Ap3d1;Ap3m1;Arf6;Arfip1;Arfrp1;Arhgap21;Arhgef2;Arl2;Arl2bp;Arl3;Arntl;Aurkb;Axin1;Axl;Bad;Bbs2;Bcap29;Bcl2l1;Bcl3;Bid;Bnip3;Bub1b;Casc3;Cav1;Ccdc64;Ccs;Cdc23;Cdca5;Cenpf;Cep57;Chmp3;Chmp5;Chmp7;Ciz1;Cope;Copg2;Crb3;Csnk1e;Ctdnep1;Cyb5r4;D6Wsu116e;Dag1;Derl1;Diap1;Dlg1;Dnaja3;Dst;Dvl1;Dynll2;Ehd4;Ergic1;Exo…
Module4_esc	cell_cycle_process	8.22246e-11	7.74699e-09	14143	555	2555	161	1.60577	3200002M19Rik;Abcb1a;Actr8;Ak1;Akap8;Anapc1;Anapc11;Anapc2;Anapc4;Apitd1;Arhgef2;Arl8a;Arl8b;Aurka;Aurkb;Bcl2l1;Bod1;Brca1;Brd4;Bub1;Bub1b;C77370;Ccnd2;Ccnf;Ccnk;Cd2ap;Cdc123;Cdc23;Cdc25a;Cdc26;Cdc6;Cdca2;Cdca5;Cdk2;Cdkn1a;Cdkn1c;Cdkn3;Cenpf;Cenph;Cenpt;Cep55;Cetn2;Chek1;Chfr;Ckap2;Ckap5;Csnk1d;Daxx;Ddx4;Dlgap5;Dst;Dync1li1;Dynlt3;E2f1;E2f5;E2f6;Ect2;Ehmt2;Eif4g3;Espl1;Fanca;Fbxw5;Foxm1;Foxo4;Fsd…
Module4_esc	mitosis	8.56613e-11	7.74699e-09	14143	240	2555	85	1.96046	3200002M19Rik;Actr8;Akap8;Anapc1;Anapc11;Anapc2;Anapc4;Apitd1;Arhgef2;Arl8a;Arl8b;Aurka;Aurkb;Bod1;Bub1;Bub1b;Ccnf;Ccnk;Cd2ap;Cdc23;Cdc26;Cdc6;Cdca2;Cdca5;Cdk2;Cenph;Cenpt;Cep55;Cetn2;Chfr;Ckap5;Dync1li1;Dynlt3;Espl1;Fsd1;Fzr1;Haus4;Haus5;Haus7;Haus8;Hmga2;Jtb;Kif11;Kif23;Kif2a;Kif2c;Mad2l2;Map2k1;Mapre1;Mapre2;Mcmbp;Mis18bp1;Ncapg;Ncaph;Ndc80;Nde1;Nek2;Nek9;Nsmce2;Nuf2;Nup37;Nusap1;Pds5a;Pinx1;P…
Module4_esc	nuclear_division	8.56613e-11	7.74699e-09	14143	240	2555	85	1.96046	3200002M19Rik;Actr8;Akap8;Anapc1;Anapc11;Anapc2;Anapc4;Apitd1;Arhgef2;Arl8a;Arl8b;Aurka;Aurkb;Bod1;Bub1;Bub1b;Ccnf;Ccnk;Cd2ap;Cdc23;Cdc26;Cdc6;Cdca2;Cdca5;Cdk2;Cenph;Cenpt;Cep55;Cetn2;Chfr;Ckap5;Dync1li1;Dynlt3;Espl1;Fsd1;Fzr1;Haus4;Haus5;Haus7;Haus8;Hmga2;Jtb;Kif11;Kif23;Kif2a;Kif2c;Mad2l2;Map2k1;Mapre1;Mapre2;Mcmbp;Mis18bp1;Ncapg;Ncaph;Ndc80;Nde1;Nek2;Nek9;Nsmce2;Nuf2;Nup37;Nusap1;Pds5a;Pinx1;P…
Module4_esc	cellular_biosynthetic_process	9.72218e-11	8.52605e-09	14143	2562	2555	578	1.24882	2410022L05Rik;2810405K02Rik;Abhd5;Abt1;Acadm;Acsl3;Acsl5;Actr8;Ada;Adi1;Aebp1;Aff4;Agpat1;Agpat2;Agpat3;Agpat4;Agpat6;Aimp2;Aire;Ak1;Ak3;Akirin2;Akt2;Alad;Aldh9a1;Amd1;Ampd2;Apitd1;Apoa2;Arid1a;Arnt;Arntl;Arrb2;Asf1a;Asf1b;Asl;Asnsd1;Asxl1;Atad2;Atf1;Atf6b;Atp1b1;Atxn7l3;Azin1;B3gnt2;B3gnt7;Baz1a;Baz1b;Bcl3;Bcor;Bptf;Brca1;Brd7;Brd8;Brms1;C1d;C77370;C80913;Cand1;Cbs;Cc2d1b;Ccar1;Ccdc59;Ccne2;Ccnh…
Module4_esc	cell_cycle_phase	1.06023e-10	9.02439e-09	14143	449	2555	136	1.67665	3200002M19Rik;Abcb1a;Actr8;Akap8;Anapc1;Anapc11;Anapc2;Anapc4;Apitd1;Arhgef2;Arl8a;Arl8b;Aurka;Aurkb;Bcl2l1;Bod1;Brd4;Bub1;Bub1b;C77370;Ccnd2;Ccnf;Ccnk;Cd2ap;Cdc123;Cdc23;Cdc25a;Cdc26;Cdc6;Cdca2;Cdca5;Cdk2;Cdkn1a;Cenpf;Cenph;Cenpt;Cep55;Cetn2;Chek1;Chfr;Ckap5;Csnk1d;Ddx4;Dlgap5;Dync1li1;Dynlt3;E2f1;E2f5;E2f6;Ehmt2;Eif4g3;Espl1;Fanca;Foxm1;Foxo4;Fsd1;Fzr1;Gigyf2;Haus4;Haus5;Haus7;Haus8;Hmga2;Jtb;K…
Module4_esc	biosynthetic_process	1.42307e-10	1.17667e-08	14143	2659	2555	596	1.24073	0610007P14Rik;2410022L05Rik;2810405K02Rik;Aasdhppt;Abhd5;Abt1;Acadm;Acsl3;Acsl5;Actr8;Ada;Adi1;Aebp1;Aff4;Agpat1;Agpat2;Agpat3;Agpat4;Agpat6;Aimp2;Aire;Ak1;Ak3;Akirin2;Akt2;Alad;Aldh9a1;Amd1;Ampd2;Apitd1;Apoa2;Arid1a;Arnt;Arntl;Arrb2;Asf1a;Asf1b;Asl;Asnsd1;Asxl1;Atad2;Atf1;Atf6b;Atp1b1;Atxn7l3;Azin1;B3gnt2;B3gnt7;Baz1a;Baz1b;Bcl3;Bcor;Bptf;Brca1;Brd7;Brd8;Brms1;C1d;C77370;C80913;Cand1;Cbs;Cc2d1b;…
Module4_esc	organelle_fission	1.49076e-10	1.1984e-08	14143	254	2555	88	1.91778	3200002M19Rik;Actr8;Akap8;Anapc1;Anapc11;Anapc2;Anapc4;Apitd1;Arhgef2;Arl8a;Arl8b;Atg3;Aurka;Aurkb;Bnip3;Bod1;Bub1;Bub1b;Ccnf;Ccnk;Cd2ap;Cdc23;Cdc26;Cdc6;Cdca2;Cdca5;Cdk2;Cenph;Cenpt;Cep55;Cetn2;Chfr;Ckap5;Dnm1l;Dync1li1;Dynlt3;Espl1;Fsd1;Fzr1;Haus4;Haus5;Haus7;Haus8;Hmga2;Jtb;Kif11;Kif23;Kif2a;Kif2c;Mad2l2;Map2k1;Mapre1;Mapre2;Mcmbp;Mis18bp1;Ncapg;Ncaph;Ndc80;Nde1;Nek2;Nek9;Nsmce2;Nuf2;Nup37;Nus…
Module4_esc	protein_transport	1.70917e-10	1.33685e-08	14143	738	2555	201	1.50761	1500003O03Rik;Agap3;Ahcyl1;Aip;Ap1b1;Ap1g1;Ap1m1;Ap2a2;Ap2b1;Ap3b1;Ap3d1;Ap3m1;Arf3;Arf6;Arfgap2;Arfip1;Arfrp1;Arl3;Arntl;Arrb2;Atg16l1;Atg3;Atg4b;Bbs2;Bcap29;Bcl3;Bid;Bnip1;Cenpf;Cep57;Chchd4;Chmp2b;Chmp3;Chmp5;Chmp6;Chmp7;Cope;Copg2;Dag1;Ddx19a;Derl1;Dnm2;Ect2;Eif4enif1;Eps15;Exoc4;Fam125a;Fam53a;Fxc1;Gas6;Gdi1;Gga1;Gga2;Gnptab;Golga4;Gosr2;Hdac6;Hgs;Hook1;Ift46;Ing1;Ipo13;Ipo9;Jun;Kdelr2;Kif13…
Module4_esc	cellular_component_biogenesis	1.89323e-10	1.44185e-08	14143	1076	2555	274	1.40958	0610007P22Rik;2310016M24Rik;2410003K15Rik;Abl2;Acadm;Acads;Acat1;Acta1;Agrn;Aifm1;Ak3;Akap2;Alad;Amfr;Ap1b1;Ap2b1;Apoa2;Arl6;Asf1a;Asf1b;Atf1;Atg16l1;Atg3;Atg4b;Atl2;Atxn2;Aurkb;Axin1;B9d1;Bad;Baiap2;Bbs2;Bcl10;Becn1;Bid;Bin3;Brix1;C1d;Cat;Cav1;Cby1;Cenpt;Cep57;Chaf1a;Ciao1;Cirbp;Clint1;Cnot7;Cox15;Cpsf6;Cpsf7;Crnkl1;Cryab;Csnk1d;Cuta;Cyba;Dcxr;Ddx47;Ddx56;Ddx6;Dhps;Dhrs4;Diap1;Dimt1;Dis3;Dlc1;Dl…
Module4_esc	establishment_of_protein_localization	2.45236e-10	1.81978e-08	14143	759	2555	205	1.49507	1500003O03Rik;Agap3;Ahcyl1;Aip;Ap1b1;Ap1g1;Ap1m1;Ap2a2;Ap2b1;Ap3b1;Ap3d1;Ap3m1;Arf3;Arf6;Arfgap2;Arfip1;Arfrp1;Arl3;Arntl;Arrb2;Atg16l1;Atg3;Atg4b;Bbs2;Bcap29;Bcl3;Bid;Bnip1;Cenpf;Cep57;Chchd4;Chmp2b;Chmp3;Chmp5;Chmp6;Chmp7;Cope;Copg2;Cript;Dag1;Ddx19a;Derl1;Dnm2;Ect2;Eif4enif1;Eps15;Exoc4;Fam125a;Fam53a;Fxc1;Gas6;Gdi1;Gga1;Gga2;Gnptab;Golga4;Gosr2;Hdac6;Hgs;Hook1;Ift46;Ing1;Ipo13;Ipo9;Jun;Kdelr2…
Module4_esc	M_phase	2.90062e-10	2.0986e-08	14143	354	2555	112	1.75132	3200002M19Rik;Actr8;Akap8;Anapc1;Anapc11;Anapc2;Anapc4;Apitd1;Arhgef2;Arl8a;Arl8b;Aurka;Aurkb;Bod1;Bub1;Bub1b;Ccnf;Ccnk;Cd2ap;Cdc23;Cdc26;Cdc6;Cdca2;Cdca5;Cdk2;Cenpf;Cenph;Cenpt;Cep55;Cetn2;Chfr;Ckap5;Csnk1d;Ddx4;Dlgap5;Dync1li1;Dynlt3;Ehmt2;Eif4g3;Espl1;Fanca;Fsd1;Fzr1;Haus4;Haus5;Haus7;Haus8;Hmga2;Jtb;Kif11;Kif23;Kif2a;Kif2c;Klhdc3;Mad2l2;Mael;Map2k1;Mapre1;Mapre2;Mcmbp;Mis18bp1;Mnd1;Mns1;Nbn;N…
Module4_esc	mRNA_metabolic_process	7.51323e-10	5.30324e-08	14143	326	2555	104	1.7659	2610301G19Rik;Ahcyl1;Aqr;Casc3;Cnot7;Cpsf1;Cpsf2;Cpsf3;Cpsf4;Cpsf6;Cpsf7;Crnkl1;Cstf1;Cstf2;Cwc22;Dcps;Ddx20;Ddx41;Ddx46;Ddx47;Dhx38;Dhx8;Exosc5;Exosc9;Fam103a1;Fip1l1;Frg1;Gemin5;Gemin6;Gemin7;Hspa1b;Jmjd6;Khdrbs3;Khsrp;Lsm3;Lsm6;Luc7l3;Magohb;Mettl3;Mov10;Ncbp1;Ncbp2;Paf1;Parn;Pdcd11;Phrf1;Pnpt1;Pnrc2;Pop4;Ppil3;Ppp4r2;Prmt7;Prpf3;Prpf38a;Prpf38b;Prpf4b;Prpf6;Qk;Rbfox2;Rbm22;Rbm25;Rbm26;Rbm28;R…
Module4_esc	ribosome_biogenesis	1.1151e-09	7.68355e-08	14143	148	2555	58	2.16929	0610007P22Rik;2410003K15Rik;Brix1;C1d;Ddx47;Ddx56;Dimt1;Dis3;Drosha;Exosc1;Exosc2;Exosc5;Exosc9;Frg1;Gnl1;Gnl3l;Gtpbp10;Gtpbp4;Imp4;Ipo9;Isg20l2;Krr1;Las1l;Lsg1;Lsm6;Mina;Mphosph10;Mphosph6;Mrpl10;Mtg1;Naf1;Nip7;Nol9;Pdcd11;Pin4;Pop4;Pop5;Rbfa;Rcl1;Rpl5;Rrn3;Rrp1b;Rrp36;Rrp8;Sdad1;Sirt1;Skiv2l2;Tbl3;Tfb1m;Tfb2m;Tsr2;Utp14a;Utp15;Utp18;Utp20;Utp6;Wbp11;Wdr55
Module4_esc	establishment_of_localization_in_cell	1.26903e-09	8.54089e-08	14143	814	2555	214	1.45526	1500003O03Rik;Agap3;Ahcyl1;Aip;Ankrd27;Anxa3;Ap1b1;Ap1g1;Ap1m1;Ap2a2;Ap2b1;Ap3b1;Ap3d1;Ap3m1;Arfip1;Arfrp1;Arhgap21;Arhgef2;Arl3;Arntl;Axin1;Axl;Bad;Bbs2;Bcap29;Bcl2l1;Bcl3;Bid;Bnip3;Ccdc64;Ccs;Cdc23;Cdca5;Cenpf;Cep57;Chmp3;Chmp5;Chmp7;Cope;Copg2;Cyb5r4;D6Wsu116e;Dag1;Derl1;Dst;Dvl1;Dynll2;Ehd4;Ergic1;Exoc4;Fam53a;Fbxo22;Furin;Fxc1;Fyttd1;Gas6;Gga1;Gga2;Gnpda1;Gnptab;Golga4;Golga7;Hap1;Hdac6;Hgs;…
Module4_esc	mRNA_processing	3.76667e-09	2.47744e-07	14143	281	2555	91	1.79261	2610301G19Rik;Ahcyl1;Aqr;Casc3;Cnot7;Cpsf1;Cpsf2;Cpsf3;Cpsf4;Cpsf6;Cpsf7;Crnkl1;Cstf1;Cstf2;Cwc22;Ddx20;Ddx41;Ddx46;Ddx47;Dhx38;Dhx8;Fam103a1;Fip1l1;Frg1;Gemin5;Gemin6;Gemin7;Jmjd6;Khdrbs3;Khsrp;Lsm3;Lsm6;Luc7l3;Magohb;Mov10;Ncbp1;Ncbp2;Paf1;Parn;Pdcd11;Phrf1;Pnpt1;Pop4;Ppil3;Ppp4r2;Prmt7;Prpf3;Prpf38a;Prpf38b;Prpf4b;Prpf6;Qk;Rbfox2;Rbm22;Rbm25;Rbm26;Rbm28;Rbm38;Rbm5;Rnmt;Rod1;Rsrc1;Scaf1;Scaf11;…
Module4_esc	macromolecule_catabolic_process	6.82685e-09	4.39042e-07	14143	419	2555	123	1.62496	Afg3l1;Afg3l2;Agap3;Aifm1;Amfr;Anapc2;Anapc4;Aph1a;Arih1;Arih2;Arrb2;Axin1;Bap1;Bnip3;C77370;Capn1;Casc3;Casp3;Cast;Ccnf;Cd2ap;Cd44;Cdc26;Chfr;Cln6;Clpx;Cnot7;Cul2;Cul4a;Cul7;Cycs;Dcps;Derl1;Dis3;Dna2;Dnajc10;Drosha;Dtl;Erlin2;Exosc5;Exosc9;Fbxo6;Fbxw11;Fbxw5;Fbxw8;Fen1;Fzr1;Gaa;Gns;Hdac6;Hectd1;Herc4;Hspa1b;Ide;Jkamp;Ldlr;Lonp1;Lonp2;Lsm6;Man1b1;Manba;Ncbp1;Ncbp2;Nthl1;Nub1;Os9;Parn;Pcnp;Pja1;Pn…
Module4_esc	ncRNA_processing	1.02306e-08	6.43636e-07	14143	190	2555	67	1.95196	0610007P22Rik;C1d;Ctu2;Ddx47;Ddx56;Dimt1;Dis3;Drosha;Dus1l;Dus3l;Elac2;Exosc1;Exosc2;Exosc5;Exosc9;Frg1;Imp4;Ints1;Ints10;Ints3;Ints4;Ints7;Ints8;Krr1;Las1l;Lsm6;Mettl1;Mphosph10;Mphosph6;Naf1;Nol9;Osgep;Pdcd11;Pin4;Pop4;Pop5;Pus1;Pusl1;Qtrt1;Rbfa;Rcl1;Rpl5;Rpp14;Rpp21;Rpp30;Rpp40;Rrp1b;Rrp36;Rrp8;Sirt1;Skiv2l2;Tbl3;Tfb1m;Tfb2m;Thg1l;Trmt6;Trnt1;Tsen15;Tsen54;Tsr2;Utp14a;Utp15;Utp18;Utp20;Utp6;Wb…
Module4_esc	catabolic_process	1.34615e-08	8.28887e-07	14143	1096	2555	269	1.3586	9430023L20Rik;Abcb1a;Abhd4;Acaa1a;Acaa2;Acadm;Acads;Acadvl;Aco1;Acsl1;Ada;Adpgk;Afg3l1;Afg3l2;Agap3;Aifm1;Akr1b8;Amfr;Anapc2;Anapc4;Aph1a;Apoa2;Arf6;Arfrp1;Arih1;Arih2;Arl2;Arl4a;Arrb2;Atad1;Atg16l1;Atg3;Atg4b;Atp6v1c1;Axin1;Bad;Bap1;Bckdha;Bckdhb;Bckdk;Becn1;Bnip1;Bnip3;C77370;Capn1;Casc3;Casp3;Cast;Cat;Cbr1;Cbr3;Cbs;Ccnf;Cd2ap;Cd44;Cdc26;Chd1l;Chfr;Cln6;Clpx;Cnot7;Comt;Crot;Cul2;Cul4a;Cul7;Cycs…
Module4_esc	rRNA_metabolic_process	2.43904e-08	1.47054e-06	14143	104	2555	43	2.28868	0610007P22Rik;C1d;Ddx47;Ddx56;Dimt1;Dis3;Drosha;Exosc1;Exosc2;Exosc5;Exosc9;Frg1;Imp4;Krr1;Las1l;Lsm6;Mphosph10;Mphosph6;Naf1;Nol9;Pdcd11;Pin4;Pop4;Pop5;Rbfa;Rcl1;Rpl5;Rrp1b;Rrp36;Rrp8;Sirt1;Skiv2l2;Tbl3;Tfb1m;Tfb2m;Tsr2;Utp14a;Utp15;Utp18;Utp20;Utp6;Wbp11;Wdr55
Module4_esc	cellular_macromolecule_catabolic_process	2.62316e-08	1.54927e-06	14143	363	2555	108	1.6469	Agap3;Aifm1;Amfr;Anapc2;Anapc4;Arih1;Arih2;Arrb2;Bap1;Bnip3;C77370;Casc3;Casp3;Ccnf;Cd2ap;Cdc26;Chfr;Cln6;Clpx;Cnot7;Cul2;Cul4a;Cul7;Cycs;Dcps;Derl1;Dis3;Dna2;Dnajc10;Drosha;Dtl;Erlin2;Exosc5;Exosc9;Fbxo6;Fbxw11;Fbxw5;Fbxw8;Fen1;Fzr1;Hdac6;Hectd1;Herc4;Hspa1b;Ide;Jkamp;Ldlr;Lonp1;Lonp2;Lsm6;Man1b1;Ncbp1;Ncbp2;Nthl1;Nub1;Os9;Parn;Pcnp;Pnpt1;Pnrc2;Pold1;Pop1;Ppt1;Psmb10;Rad23a;Rbbp6;Rbm8a;Rnaseh2b;…
Module4_esc	chromosome_organization	2.71686e-08	1.57252e-06	14143	521	2555	144	1.52994	2410022L05Rik;Akap8;Arid1a;Asf1a;Asf1b;Asxl1;Atxn7l3;Bap1;Baz1a;Baz1b;Bcor;Bnip3;Bptf;Brd1;Brd4;Brd8;Bre;Cdc23;Cdca5;Cdk2;Cenph;Cenpt;Chaf1a;Chd1;Chd1l;Chek1;Ctr9;Cxxc1;Dapk3;Dmap1;Dr1;Ehmt2;Ep400;Epc2;Ercc1;Espl1;Eya3;H1f0;H2afj;H2afv;H2afy2;Hcfc1;Hdac6;Hira;Hist1h2af;Hmg20b;Hmga2;Hmgn5;Hp1bp3;Hspa1b;Ing3;Jmjd6;Kat5;Kdm1a;Kdm2a;Kdm3a;Kdm3b;Kdm4a;Kdm5c;L3mbtl2;Ldb1;Loxl2;Lrwd1;Mael;Map3k7;Mbtd1;M…
Module4_esc	rRNA_processing	2.89916e-08	1.64513e-06	14143	101	2555	42	2.30186	0610007P22Rik;C1d;Ddx47;Ddx56;Dimt1;Dis3;Exosc1;Exosc2;Exosc5;Exosc9;Frg1;Imp4;Krr1;Las1l;Lsm6;Mphosph10;Mphosph6;Naf1;Nol9;Pdcd11;Pin4;Pop4;Pop5;Rbfa;Rcl1;Rpl5;Rrp1b;Rrp36;Rrp8;Sirt1;Skiv2l2;Tbl3;Tfb1m;Tfb2m;Tsr2;Utp14a;Utp15;Utp18;Utp20;Utp6;Wbp11;Wdr55
Module4_esc	microtubule_cytoskeleton_organization	5.15172e-08	2.86713e-06	14143	193	2555	66	1.89294	1500003O03Rik;Ap1g1;Arhgef2;Arl2;Aurkb;Axin1;Bbs2;Brca1;Cav1;Cep57;Cetn2;Ckap5;Cript;Cryab;Csnk1d;Dag1;Dock7;Dst;Dvl1;Espl1;Fbxw5;Gas2l1;Haus4;Haus5;Haus7;Haus8;Hook1;Ift46;Katna1;Kif11;Kif20a;Kif23;Kif2a;Kif2c;Mtap1s;Mtap7;Ncor1;Ndc80;Nde1;Ndel1;Nefh;Nefl;Nek2;Nuf2;Numa1;Nusap1;Pex14;Plk4;Ptk2;Racgap1;Ralbp1;Rock2;Sac3d1;Seh1l;Slain2;Spag5;Spc25;Tacc2;Tbce;Tppp3;Tubg1;Tubgcp3;Tubgcp4;Uxt;Zfp828;…
Module4_esc	cellular_catabolic_process	5.99133e-08	3.27149e-06	14143	926	2555	230	1.37489	9430023L20Rik;Abcb1a;Acaa1a;Acaa2;Acadm;Acads;Acadvl;Aco1;Acsl1;Ada;Agap3;Aifm1;Akr1b8;Amfr;Anapc2;Anapc4;Apoa2;Arf6;Arfrp1;Arih1;Arih2;Arl2;Arl4a;Arrb2;Atad1;Atg16l1;Atg3;Atg4b;Atp6v1c1;Bap1;Bckdha;Bckdhb;Bckdk;Becn1;Bnip1;Bnip3;C77370;Capn1;Casc3;Casp3;Cat;Cbr1;Cbr3;Cbs;Ccnf;Cd2ap;Cdc26;Chd1l;Chfr;Cln6;Clpx;Cnot7;Crot;Cul2;Cul4a;Cul7;Cycs;Dap;Dcps;Dera;Derl1;Dis3;Dna2;Dnajc10;Dpysl3;Drosha;Dtd1…
Module4_esc	chromatin_modification	7.69451e-08	4.12369e-06	14143	344	2555	102	1.64132	2410022L05Rik;Arid1a;Asf1a;Asf1b;Asxl1;Atxn7l3;Bap1;Baz1a;Baz1b;Bcor;Bnip3;Bptf;Brd1;Brd4;Brd8;Bre;Cdk2;Chd1;Chd1l;Chek1;Ctr9;Cxxc1;Dapk3;Dmap1;Dr1;Ehmt2;Ep400;Epc2;Eya3;H2afy2;Hcfc1;Hdac6;Hira;Hmg20b;Hmga2;Hmgn5;Ing3;Jmjd6;Kat5;Kdm1a;Kdm2a;Kdm3a;Kdm3b;Kdm4a;Kdm5c;L3mbtl2;Ldb1;Loxl2;Lrwd1;Map3k7;Mbtd1;Meaf6;Med24;Men1;Mgea5;Msl1;Msl3;Myst2;Ncoa3;Nsd1;Paf1;Pcgf2;Phf17;Pole3;Pole4;Prmt7;Rbbp5;Rbm14…
Module4_esc	cellular_protein_metabolic_process	1.13951e-07	5.99589e-06	14143	2060	2555	458	1.23069	Abi1;Abl2;Acp1;Adam9;Adrbk1;Afg3l1;Afg3l2;Agap3;Aimp2;Aip;Akt2;Amfr;Anapc1;Anapc11;Anapc2;Anapc4;Aph1a;Apoa2;Araf;Arih1;Arih2;Arl6;Arrb2;Asl;Asxl1;Atg3;Atxn7l3;Aurka;Aurkb;Axin1;Axl;B3gnt2;B3gnt7;Bap1;Baz1b;Bckdk;Bcl10;Bcor;Bnip3;Brap;Brca1;Brd1;Brd4;Brd8;Bub1;Bub1b;C80913;Cand1;Ccnf;Ccnh;Cd2ap;Cdc23;Cdc26;Cdc42bpb;Cdk11b;Cdk16;Cdk2;Cdk8;Cdkn3;Chek1;Chfr;Chordc1;Chuk;Clk2;Clk4;Clpx;Clu;Cops7b;Cry…
Module4_esc	macromolecule_modification	1.3769e-07	7.11563e-06	14143	1615	2555	369	1.26475	Abi1;Abl2;Acp1;Adam9;Adrbk1;Akt2;Alkbh3;Amfr;Anapc1;Anapc11;Anapc2;Anapc4;Apoa2;Araf;Arih1;Arih2;Arl6;Arrb2;Asl;Asxl1;Atg3;Atxn7l3;Aurka;Aurkb;Axin1;Axl;B3gnt2;B3gnt7;Bap1;Baz1b;Bckdk;Bcl10;Bcor;Brap;Brca1;Brd1;Brd4;Brd8;Bub1;Bub1b;Cand1;Ccnf;Ccnh;Cdc23;Cdc26;Cdc42bpb;Cdk11b;Cdk16;Cdk2;Cdk8;Cdkn3;Chek1;Chfr;Chuk;Clk2;Clk4;Cops7b;Cry1;Csk;Csnk1d;Csnk1e;Csnk2a2;Ctdnep1;Ctdsp1;Ctdsp2;Ctr9;Cxxc1;Cyhr…
Module4_esc	chromosome_segregation	2.03626e-07	1.03385e-05	14143	118	2555	45	2.11097	Akap8;Apitd1;Arl8a;Arl8b;Brca1;Brd4;Bub1;Cdc23;Cdca5;Cenpf;Cenph;Cenpt;Ciao1;Espl1;Fam96a;Fam96b;Kif2c;Mcmbp;Mms19;Ncapg;Ncaph;Ndc80;Ndel1;Nek2;Nuf2;Nup37;Nusap1;Pinx1;Pmf1;Seh1l;Sgol2;Smarcad1;Smc1a;Smc2;Smc3;Spag5;Spc25;Srpk1;Stag2;Stag3;Top1;Top2b;Usp9x;Zfp828;Zw10
Module4_esc	RNA_localization	2.69812e-07	1.34627e-05	14143	83	2555	35	2.33421	Casc3;Ddx19a;Fmr1;Fyttd1;Khsrp;Lrpprc;Magohb;Myo1c;Ncbp1;Ncbp2;Nup107;Nup133;Nup160;Nup188;Nup37;Nup50;Nup54;Nupl1;Nxt1;Phax;Pnpt1;Pom121;Prpf6;Qk;Ranbp2;Seh1l;Senp2;Stau1;Thoc3;Thoc5;Thoc6;Tmem48;Tst;Xpot;Yy1
Module4_esc	cellular_protein_modification_process	2.90796e-07	1.4026e-05	14143	1541	2555	352	1.26442	Abi1;Abl2;Acp1;Adam9;Adrbk1;Akt2;Amfr;Anapc1;Anapc11;Anapc2;Anapc4;Apoa2;Araf;Arih1;Arih2;Arl6;Arrb2;Asl;Asxl1;Atg3;Atxn7l3;Aurka;Aurkb;Axin1;Axl;B3gnt2;B3gnt7;Bap1;Baz1b;Bckdk;Bcl10;Bcor;Brap;Brca1;Brd1;Brd4;Brd8;Bub1;Bub1b;Cand1;Ccnf;Ccnh;Cdc23;Cdc26;Cdc42bpb;Cdk11b;Cdk16;Cdk2;Cdk8;Cdkn3;Chek1;Chfr;Chuk;Clk2;Clk4;Cops7b;Cry1;Csk;Csnk1d;Csnk1e;Csnk2a2;Ctdnep1;Ctdsp1;Ctdsp2;Ctr9;Cxxc1;Cyhr1;Dab2i…
Module4_esc	protein_modification_process	2.90796e-07	1.4026e-05	14143	1541	2555	352	1.26442	Abi1;Abl2;Acp1;Adam9;Adrbk1;Akt2;Amfr;Anapc1;Anapc11;Anapc2;Anapc4;Apoa2;Araf;Arih1;Arih2;Arl6;Arrb2;Asl;Asxl1;Atg3;Atxn7l3;Aurka;Aurkb;Axin1;Axl;B3gnt2;B3gnt7;Bap1;Baz1b;Bckdk;Bcl10;Bcor;Brap;Brca1;Brd1;Brd4;Brd8;Bub1;Bub1b;Cand1;Ccnf;Ccnh;Cdc23;Cdc26;Cdc42bpb;Cdk11b;Cdk16;Cdk2;Cdk8;Cdkn3;Chek1;Chfr;Chuk;Clk2;Clk4;Cops7b;Cry1;Csk;Csnk1d;Csnk1e;Csnk2a2;Ctdnep1;Ctdsp1;Ctdsp2;Ctr9;Cxxc1;Cyhr1;Dab2i…
Module4_esc	transcription,_DNA-dependent	3.0543e-07	1.44904e-05	14143	1477	2555	339	1.27049	2410022L05Rik;Abt1;Actr8;Aebp1;Aff4;Aire;Akirin2;Apitd1;Arid1a;Arnt;Arntl;Arrb2;Asf1a;Asf1b;Asxl1;Atad2;Atf1;Atf6b;Atxn7l3;Baz1a;Baz1b;Bcl3;Bcor;Bptf;Brd7;Brd8;Brms1;C1d;C80913;Cand1;Cc2d1b;Ccar1;Ccdc59;Ccnh;Ccnk;Ccnl1;Ccnl2;Cd3eap;Cdca7l;Cdk8;Cdyl;Cebpz;Cggbp1;Chaf1a;Chd1;Cic;Cnot1;Cnot2;Cnot3;Cnot6;Cnot7;Cnot8;Cobra1;Crcp;Crebzf;Cry1;Csnk2a2;Ctbp2;Ctr9;Cxxc1;D14Ertd668e;Dapk3;Daxx;Dedd;Dmap1;Dm…
Module4_esc	RNA_biosynthetic_process	3.51576e-07	1.64107e-05	14143	1479	2555	339	1.26877	2410022L05Rik;Abt1;Actr8;Aebp1;Aff4;Aire;Akirin2;Apitd1;Arid1a;Arnt;Arntl;Arrb2;Asf1a;Asf1b;Asxl1;Atad2;Atf1;Atf6b;Atxn7l3;Baz1a;Baz1b;Bcl3;Bcor;Bptf;Brd7;Brd8;Brms1;C1d;C80913;Cand1;Cc2d1b;Ccar1;Ccdc59;Ccnh;Ccnk;Ccnl1;Ccnl2;Cd3eap;Cdca7l;Cdk8;Cdyl;Cebpz;Cggbp1;Chaf1a;Chd1;Cic;Cnot1;Cnot2;Cnot3;Cnot6;Cnot7;Cnot8;Cobra1;Crcp;Crebzf;Cry1;Csnk2a2;Ctbp2;Ctr9;Cxxc1;D14Ertd668e;Dapk3;Daxx;Dedd;Dmap1;Dm…
Module4_esc	ncRNA_metabolic_process	3.60611e-07	1.65652e-05	14143	239	2555	75	1.73706	0610007P22Rik;C1d;Ctu2;Dalrd3;Dars2;Ddx47;Ddx56;Dimt1;Dis3;Drosha;Dus1l;Dus3l;Elac2;Exosc1;Exosc2;Exosc5;Exosc9;Frg1;Iars2;Imp4;Ints1;Ints10;Ints3;Ints4;Ints7;Ints8;Krr1;Las1l;Lsm6;Mael;Mettl1;Mphosph10;Mphosph6;Naf1;Nol9;Osgep;Pdcd11;Pin4;Pop1;Pop4;Pop5;Pus1;Pusl1;Qtrt1;Rars2;Rbfa;Rcl1;Rpl5;Rpp14;Rpp21;Rpp30;Rpp40;Rrp1b;Rrp36;Rrp8;Sirt1;Skiv2l2;Tars2;Tbl3;Tfb1m;Tfb2m;Thg1l;Trmt6;Trnt1;Tsen15;Tse…
Module4_esc	cellular_macromolecule_biosynthetic_process	7.80493e-07	3.52929e-05	14143	2046	2555	449	1.21476	2410022L05Rik;Abt1;Acadm;Actr8;Aebp1;Aff4;Aimp2;Aire;Akirin2;Akt2;Apitd1;Arid1a;Arnt;Arntl;Arrb2;Asf1a;Asf1b;Asxl1;Atad2;Atf1;Atf6b;Atxn7l3;B3gnt2;B3gnt7;Baz1a;Baz1b;Bcl3;Bcor;Bptf;Brca1;Brd7;Brd8;Brms1;C1d;C77370;C80913;Cand1;Cc2d1b;Ccar1;Ccdc59;Ccne2;Ccnh;Ccnk;Ccnl1;Ccnl2;Cd3eap;Cdc45;Cdc6;Cdca7l;Cdk8;Cdyl;Cebpz;Cggbp1;Chaf1a;Chd1;Chtf18;Chtf8;Cic;Cinp;Cmas;Cnot1;Cnot2;Cnot3;Cnot6;Cnot7;Cnot8;C…
Module4_esc	regulation_of_metabolic_process	7.97967e-07	3.55279e-05	14143	3671	2555	761	1.1475	0610031J06Rik;1500003O03Rik;2410022L05Rik;2610301G19Rik;2810002N01Rik;4930447C04Rik;5033414D02Rik;Abhd5;Abi1;Abl2;Abt1;Acadm;Acadvl;Aco1;Acsl1;Acsl5;Actr8;Adam9;Adap1;Aebp1;Aff4;Agrn;Ahcyl1;Aida;Aifm1;Aimp2;Aip;Aire;Akap1;Akirin2;Akt2;Alkbh3;Ankrd1;Ankrd27;Anxa3;Aph1a;Apoa2;Araf;Arfgap2;Arhgap1;Arhgdig;Arhgef2;Arid1a;Arl2;Arl2bp;Arnt;Arntl;Arrb2;Asap2;Asf1a;Asf1b;Asxl1;Atad1;Atad2;Atf1;Atf6b;Atg4…
Module4_esc	microtubule-based_process	8.65238e-07	3.79394e-05	14143	282	2555	84	1.64885	1500003O03Rik;Actr10;Ap1g1;Arhgap21;Arhgef2;Arl2;Arl3;Aurkb;Axin1;Bbs2;Brca1;Cav1;Cep57;Cetn2;Ckap5;Cript;Cryab;Csnk1d;Dag1;Dock7;Dst;Dvl1;Dync1h1;Dync1li1;Dynll2;Espl1;Fbxw5;Gas2l1;Hap1;Haus4;Haus5;Haus7;Haus8;Hif1a;Hook1;Ift46;Katna1;Kif11;Kif20a;Kif23;Kif2a;Kif2c;Kif5b;Kifap3;Klc2;Ktn1;Map2k1;Mtap1s;Mtap7;Ncor1;Ndc80;Nde1;Ndel1;Nefh;Nefl;Nek2;Nme7;Nuf2;Numa1;Nusap1;Pex14;Plk4;Ptk2;Racgap1;Ralb…
Module4_esc	RNA_splicing	9.104e-07	3.93238e-05	14143	215	2555	68	1.75074	2610301G19Rik;Aqr;Casc3;Crnkl1;Cwc22;Ddx20;Ddx41;Ddx46;Ddx47;Dhx38;Dhx8;Frg1;Gemin5;Gemin6;Gemin7;Jmjd6;Khsrp;Lsm3;Lsm6;Luc7l3;Magohb;Ncbp1;Ncbp2;Ppil3;Ppp4r2;Prmt7;Prpf3;Prpf38a;Prpf38b;Prpf4b;Prpf6;Qk;Rbfox2;Rbm22;Rbm25;Rbm28;Rbm38;Rbm5;Rod1;Rsrc1;Scaf1;Scaf11;Scaf8;Sf3a1;Sf3a2;Sfswap;Sip1;Skiv2l2;Smn1;Smndc1;Snrnp200;Snrnp27;Srpk1;Srsf2;Syf2;Thoc3;Thoc5;Thoc6;Tsen54;U2af1l4;Usp39;Wbp11;Wdr83;X…
Module4_esc	cellular_macromolecule_localization	9.6093e-07	4.08961e-05	14143	555	2555	145	1.44619	1500003O03Rik;Agap3;Agrn;Ahcyl1;Aip;Akt2;Ap1b1;Ap1g1;Ap1m1;Ap2a2;Ap2b1;Ap3b1;Ap3d1;Ap3m1;Arf6;Arfip1;Arfrp1;Arl2;Arl2bp;Arntl;Aurkb;Bbs2;Bcap29;Bcl3;Bid;Bub1b;Casc3;Cav1;Cep57;Copg2;Crb3;Csnk1e;Ctdnep1;Dag1;Derl1;Diap1;Dlg1;Dnaja3;Dvl1;Exoc4;Fam53a;Fxc1;Gas6;Gga1;Gga2;Golga4;Hdac6;Hgs;Ing1;Ipo13;Ipo9;Jub;Jun;Kdelr2;Kif13a;Kpna1;Kpna3;Lama5;Lamtor3;Lrwd1;Mapre1;Mgea5;Morc3;Mrpl45;Mtap7;Mzt1;Ndc80;…
Module4_esc	chromatin_organization	9.79624e-07	4.10874e-05	14143	392	2555	109	1.53919	2410022L05Rik;Arid1a;Asf1a;Asf1b;Asxl1;Atxn7l3;Bap1;Baz1a;Baz1b;Bcor;Bnip3;Bptf;Brd1;Brd4;Brd8;Bre;Cdk2;Chaf1a;Chd1;Chd1l;Chek1;Ctr9;Cxxc1;Dapk3;Dmap1;Dr1;Ehmt2;Ep400;Epc2;Eya3;H1f0;H2afj;H2afv;H2afy2;Hcfc1;Hdac6;Hira;Hist1h2af;Hmg20b;Hmga2;Hmgn5;Hp1bp3;Ing3;Jmjd6;Kat5;Kdm1a;Kdm2a;Kdm3a;Kdm3b;Kdm4a;Kdm5c;L3mbtl2;Ldb1;Loxl2;Lrwd1;Map3k7;Mbtd1;Meaf6;Med24;Men1;Mgea5;Msl1;Msl3;Mum1;Myst2;Ncoa3;Nsd1;…
Module4_esc	macromolecule_biosynthetic_process	1.08478e-06	4.4848e-05	14143	2067	2555	452	1.21045	2410022L05Rik;Aasdhppt;Abt1;Acadm;Actr8;Aebp1;Aff4;Aimp2;Aire;Akirin2;Akt2;Apitd1;Arid1a;Arnt;Arntl;Arrb2;Asf1a;Asf1b;Asxl1;Atad2;Atf1;Atf6b;Atxn7l3;B3gnt2;B3gnt7;Baz1a;Baz1b;Bcl3;Bcor;Bptf;Brca1;Brd7;Brd8;Brms1;C1d;C77370;C80913;Cand1;Cc2d1b;Ccar1;Ccdc59;Ccne2;Ccnh;Ccnk;Ccnl1;Ccnl2;Cd3eap;Cdc45;Cdc6;Cdca7l;Cdk8;Cdyl;Cebpz;Cggbp1;Chaf1a;Chd1;Chtf18;Chtf8;Cic;Cinp;Cmas;Cnot1;Cnot2;Cnot3;Cnot6;Cnot…
Module4_esc	RNA_transport	1.79771e-06	7.1268e-05	14143	78	2555	32	2.27094	Casc3;Ddx19a;Fmr1;Fyttd1;Khsrp;Lrpprc;Magohb;Myo1c;Ncbp1;Ncbp2;Nup107;Nup133;Nup160;Nup188;Nup37;Nup50;Nup54;Nupl1;Nxt1;Phax;Pnpt1;Pom121;Qk;Ranbp2;Seh1l;Senp2;Thoc3;Thoc5;Thoc6;Tmem48;Tst;Xpot
Module4_esc	establishment_of_RNA_localization	1.79771e-06	7.1268e-05	14143	78	2555	32	2.27094	Casc3;Ddx19a;Fmr1;Fyttd1;Khsrp;Lrpprc;Magohb;Myo1c;Ncbp1;Ncbp2;Nup107;Nup133;Nup160;Nup188;Nup37;Nup50;Nup54;Nupl1;Nxt1;Phax;Pnpt1;Pom121;Qk;Ranbp2;Seh1l;Senp2;Thoc3;Thoc5;Thoc6;Tmem48;Tst;Xpot
Module4_esc	nucleic_acid_transport	1.79771e-06	7.1268e-05	14143	78	2555	32	2.27094	Casc3;Ddx19a;Fmr1;Fyttd1;Khsrp;Lrpprc;Magohb;Myo1c;Ncbp1;Ncbp2;Nup107;Nup133;Nup160;Nup188;Nup37;Nup50;Nup54;Nupl1;Nxt1;Phax;Pnpt1;Pom121;Qk;Ranbp2;Seh1l;Senp2;Thoc3;Thoc5;Thoc6;Tmem48;Tst;Xpot
Module4_esc	cellular_protein_localization	1.90071e-06	7.43331e-05	14143	552	2555	143	1.43399	1500003O03Rik;Agap3;Agrn;Ahcyl1;Aip;Akt2;Ap1b1;Ap1g1;Ap1m1;Ap2a2;Ap2b1;Ap3b1;Ap3d1;Ap3m1;Arf6;Arfip1;Arfrp1;Arl2;Arl2bp;Arntl;Aurkb;Bbs2;Bcap29;Bcl3;Bid;Bub1b;Cav1;Cep57;Copg2;Crb3;Csnk1e;Ctdnep1;Dag1;Derl1;Diap1;Dlg1;Dnaja3;Dvl1;Exoc4;Fam53a;Fxc1;Gas6;Gga1;Gga2;Golga4;Hdac6;Hgs;Ing1;Ipo13;Ipo9;Jub;Jun;Kdelr2;Kif13a;Kpna1;Kpna3;Lama5;Lamtor3;Lrwd1;Mapre1;Mgea5;Morc3;Mrpl45;Mtap7;Mzt1;Ndc80;Nfkbia…
Module4_esc	nucleobase-containing_compound_transport	1.95167e-06	7.53083e-05	14143	89	2555	35	2.17685	Casc3;Ddx19a;Fmr1;Fyttd1;Gja1;Khsrp;Lrpprc;Magohb;Myo1c;Ncbp1;Ncbp2;Nup107;Nup133;Nup160;Nup188;Nup37;Nup50;Nup54;Nupl1;Nxt1;Phax;Pnpt1;Pom121;Qk;Ranbp2;Seh1l;Senp2;Slc25a17;Slc28a1;Thoc3;Thoc5;Thoc6;Tmem48;Tst;Xpot
Module4_esc	regulation_of_gene_expression	2.4965e-06	9.5064e-05	14143	2515	2555	536	1.17972	0610031J06Rik;1500003O03Rik;2410022L05Rik;2610301G19Rik;4930447C04Rik;5033414D02Rik;Abt1;Aco1;Actr8;Aebp1;Aff4;Agrn;Ahcyl1;Aire;Akirin2;Akt2;Alkbh3;Ankrd1;Anxa3;Apoa2;Arhgef2;Arid1a;Arnt;Arntl;Arrb2;Asf1a;Asf1b;Asxl1;Atad2;Atf1;Atf6b;Atxn7l3;Aurka;Aurkb;Axin1;Baz1a;Baz1b;Bbs2;Bcl10;Bcl3;Bcor;Bnip3;Bptf;Brca1;Brd4;Brd7;Brd8;Brms1;C1d;C80913;Cand1;Caprin2;Casc3;Cat;Cav1;Cbx5;Cby1;Cc2d1b;Ccar1;Ccdc5…
Module4_esc	response_to_DNA_damage_stimulus	2.59906e-06	9.76843e-05	14143	413	2555	112	1.50113	Actr8;Alkbh3;Apitd1;Asf1a;Atrx;Baz1b;Bcl3;Brca1;Bre;C77370;Casp3;Cdca5;Cdk2;Cdkn1a;Cetn2;Chaf1a;Chchd6;Chd1l;Chek1;Cib1;Cinp;Cry1;Cul4a;Dna2;Dtl;E2f1;Epc2;Ercc1;Ercc3;Eya3;Fanca;Fancl;Fbxo6;Fen1;Foxm1;Foxo3;Foxo4;Fto;Fzr1;Gnl1;Grb2;Gtf2h1;Gtf2h2;Gtf2h3;Gtf2h4;Gtf2h5;Hmga2;Hspa1b;Ints3;Ints7;Kat5;Mad2l2;Mael;Mapk14;Mapkapk2;Mcts1;Men1;Mgmt;Mms19;Mum1;Nbn;Nsmce2;Nthl1;Parp2;Phlda3;Pml;Polb;Pold1;Po…
Module4_esc	regulation_of_cell_cycle_process	2.69908e-06	9.92896e-05	14143	272	2555	80	1.62806	Anapc4;Aurkb;Bcl2l1;Bid;Brca1;Brd4;Brd7;Bre;Bub1;Ccnf;Cdc23;Cdc26;Cdc6;Cdca5;Cdk11b;Cdkn1a;Cenpf;Chek1;Chfr;Chordc1;Crlf3;Csnk2a2;Cul4a;Dmrt1;Dtl;Dync1li1;E2f1;Ecd;Ect2;Ercc3;Foxm1;Foxo4;Fzr1;Hmga2;Id2;Igf2;Ilkap;Ints3;Ints7;Kif23;Mad2l2;Mapk14;Mapkapk2;Med25;Nbn;Nme6;Nsmce2;Nusap1;Paf1;Pkn2;Pkp4;Plk4;Pml;Prcc;Prkaca;Psmg2;Ptpn11;Racgap1;Rassf1;Rbm38;Rfwd3;Rnf4;Rock2;Rrp8;Senp6;Smc1a;Smc3;Smc5;St…
Module4_esc	histone_modification	2.71039e-06	9.92896e-05	14143	221	2555	68	1.70321	Asxl1;Atxn7l3;Bap1;Baz1b;Bcor;Brd1;Brd4;Brd8;Cdk2;Chek1;Ctr9;Cxxc1;Dmap1;Dr1;Ehmt2;Ep400;Eya3;Hcfc1;Hdac6;Hmga2;Ing3;Jmjd6;Kat5;Kdm1a;Kdm2a;Kdm3a;Kdm4a;Kdm5c;Ldb1;Loxl2;Map3k7;Meaf6;Med24;Men1;Mgea5;Msl3;Myst2;Ncoa3;Nsd1;Paf1;Pcgf2;Phf17;Pole3;Pole4;Prmt7;Rbbp5;Rbm14;Rest;Rnf40;Rybp;Sap130;Setd3;Sirt1;Smarcad1;Smyd2;Suv420h1;Suv420h2;Suz12;Tada2a;Tada3;Taf5l;Taf9;Usp16;Usp21;Usp22;Wac;Wdr82;Whsc1
Module4_esc	regulation_of_cell_cycle	3.20723e-06	0.000116022	14143	506	2555	132	1.44402	3200002M19Rik;Ak1;Anapc4;Aurkb;BC004004;Bad;Bap1;Bcl2l1;Bid;Brca1;Brd4;Brd7;Bre;Btg3;Bub1;C77370;Casp3;Ccnd2;Ccne2;Ccnf;Ccnh;Ccni;Ccnk;Ccnl1;Ccnl2;Cdc23;Cdc26;Cdc6;Cdca5;Cdk11b;Cdkn1a;Cdkn1c;Cdkn3;Cenpf;Chek1;Chfr;Chordc1;Crlf3;Csnk2a2;Cul4a;Dlg1;Dmrt1;Dst;Dtl;Dync1li1;Dynlt3;E2f1;E2f5;Ecd;Ect2;Ercc3;Fgfr1;Fignl1;Foxm1;Foxo4;Fzr1;Gadd45b;Gas2l1;Gtpbp4;Hexim1;Hmga2;Id2;Igf2;Ilkap;Ints3;Ints7;Jun;K…
Module4_esc	covalent_chromatin_modification	4.55157e-06	0.00016262	14143	224	2555	68	1.6804	Asxl1;Atxn7l3;Bap1;Baz1b;Bcor;Brd1;Brd4;Brd8;Cdk2;Chek1;Ctr9;Cxxc1;Dmap1;Dr1;Ehmt2;Ep400;Eya3;Hcfc1;Hdac6;Hmga2;Ing3;Jmjd6;Kat5;Kdm1a;Kdm2a;Kdm3a;Kdm4a;Kdm5c;Ldb1;Loxl2;Map3k7;Meaf6;Med24;Men1;Mgea5;Msl3;Myst2;Ncoa3;Nsd1;Paf1;Pcgf2;Phf17;Pole3;Pole4;Prmt7;Rbbp5;Rbm14;Rest;Rnf40;Rybp;Sap130;Setd3;Sirt1;Smarcad1;Smyd2;Suv420h1;Suv420h2;Suz12;Tada2a;Tada3;Taf5l;Taf9;Usp16;Usp21;Usp22;Wac;Wdr82;Whsc1
Module4_esc	regulation_of_cellular_metabolic_process	4.61772e-06	0.000162972	14143	3250	2555	674	1.14796	0610031J06Rik;1500003O03Rik;2410022L05Rik;2610301G19Rik;4930447C04Rik;Abhd5;Abi1;Abt1;Acadm;Acadvl;Aco1;Acsl1;Acsl5;Actr8;Adam9;Adap1;Aebp1;Aff4;Agrn;Ahcyl1;Aida;Aimp2;Aire;Akap1;Akirin2;Akt2;Ankrd1;Anxa3;Apoa2;Araf;Arfgap2;Arhgap1;Arhgef2;Arid1a;Arl2;Arl2bp;Arnt;Arntl;Arrb2;Asap2;Asf1a;Asf1b;Asxl1;Atad1;Atad2;Atf1;Atf6b;Atxn2;Atxn7l3;Aurkb;Axin1;Bad;Baz1a;Baz1b;Bcl10;Bcl3;Bcor;Becn1;Bin1;Bptf;Br…
Module4_esc	mRNA_transport	5.1077e-06	0.000178092	14143	67	2555	28	2.31331	Casc3;Ddx19a;Fmr1;Fyttd1;Khsrp;Lrpprc;Magohb;Myo1c;Ncbp1;Ncbp2;Nup107;Nup133;Nup160;Nup188;Nup37;Nup50;Nup54;Nupl1;Nxt1;Pom121;Qk;Ranbp2;Seh1l;Senp2;Thoc3;Thoc5;Thoc6;Tmem48
Module4_esc	regulation_of_macromolecule_metabolic_process	5.72204e-06	0.000197138	14143	3102	2555	645	1.15098	0610031J06Rik;1500003O03Rik;2410022L05Rik;2610301G19Rik;4930447C04Rik;5033414D02Rik;Abi1;Abt1;Aco1;Acsl1;Actr8;Adam9;Aebp1;Aff4;Agrn;Ahcyl1;Aida;Aimp2;Aire;Akap1;Akirin2;Akt2;Alkbh3;Ankrd1;Anxa3;Apoa2;Araf;Arhgef2;Arid1a;Arl2bp;Arnt;Arntl;Arrb2;Asf1a;Asf1b;Asxl1;Atad1;Atad2;Atf1;Atf6b;Atg4b;Atp6ap2;Atxn2;Atxn7l3;Aurka;Aurkb;Axin1;Baz1a;Baz1b;Bbs2;Bcl10;Bcl3;Bcor;Bnip3;Bptf;Brca1;Brd4;Brd7;Brd8;Br…
Module4_esc	protein_catabolic_process	6.2555e-06	0.000210675	14143	295	2555	84	1.57619	Afg3l1;Afg3l2;Agap3;Amfr;Anapc2;Anapc4;Aph1a;Arih1;Arih2;Arrb2;Axin1;Bap1;Bnip3;Cast;Ccnf;Cd2ap;Cdc26;Chfr;Clpx;Cul2;Cul4a;Cul7;Derl1;Dnajc10;Dtl;Erlin2;Fbxo6;Fbxw11;Fbxw5;Fbxw8;Fzr1;Hdac6;Hectd1;Herc4;Ide;Jkamp;Lonp1;Lonp2;Man1b1;Manba;Nub1;Os9;Pcnp;Pja1;Ppt1;Psmb10;Rad23a;Rbbp6;Rnf4;Rnf40;Rnf5;Siah1b;Sirt1;Skp2;Smurf1;Spg7;Tbl1x;Tceb1;Tmed10;Topors;Trim24;Trpc4ap;Tsg101;Ube2d1;Ube3c;Ube4b;Uchl5…
Module4_esc	protein_metabolic_process	6.26056e-06	0.000210675	14143	2414	2555	513	1.17633	Abi1;Abl2;Acp1;Acy1;Adam15;Adam9;Adrbk1;Aebp1;Afg3l1;Afg3l2;Agap3;Aimp2;Aip;Akt2;Amfr;Amz2;Anapc1;Anapc11;Anapc2;Anapc4;Aph1a;Apoa2;Araf;Arih1;Arih2;Arl6;Arrb2;Asl;Asxl1;Atg3;Atg4b;Atp6ap2;Atxn7l3;Aurka;Aurkb;Axin1;Axl;B3gnt2;B3gnt7;Bap1;Baz1b;Bckdk;Bcl10;Bcor;Becn1;Blmh;Bmp1;Bnip3;Brap;Brca1;Brd1;Brd4;Brd8;Bub1;Bub1b;C80913;Cand1;Capn1;Capn2;Capn5;Casp3;Cast;Ccnf;Ccnh;Cd2ap;Cdc23;Cdc26;Cdc42bpb;…
Module4_esc	mitochondrion_organization	1.01358e-05	0.000337162	14143	170	2555	54	1.75831	2310016M24Rik;Afg3l1;Afg3l2;Aifm1;Aip;Atg3;Bad;Bcl2l1;Bid;Bnip3;Casp3;Chchd6;Coq7;Dctn6;Dna2;Dnaja3;Dnm1l;Epas1;Fxc1;Fxn;Gfm1;Higd2a;Hk2;Htra2;Jun;Letm1;Lonp1;Mapk9;Mfn1;Mrpl39;Msto1;Ndufs4;Nrf1;Opa1;Oxa1l;Pex5;Pim2;Pnpt1;Polg;Ppif;Pvrl2;Sdhaf1;Sod2;Spg7;Synj2bp;Tfb2m;Timm10;Timm8a1;Timm9;Tmem11;Tmem70;Tomm34;Yars2;Yme1l1
Module4_esc	DNA_metabolic_process	1.14028e-05	0.000374997	14143	546	2555	138	1.39906	Actr8;Aifm1;Akap8;Alkbh3;Apitd1;Asf1a;Asf1b;Atrx;Baz1a;Baz1b;Bnip3;Brca1;Bre;C77370;Casp3;Ccne2;Cdc45;Cdc6;Cdca5;Cdk2;Cetn2;Chaf1a;Chd1l;Chek1;Chtf18;Chtf8;Cinp;Cry1;Cul4a;Cycs;Dna2;Dnaja3;Dtl;Ehmt2;Epc2;Ercc1;Ercc3;Exosc5;Eya3;Fanca;Fancl;Fbxo6;Fen1;Foxp1;Fto;Fzr1;Gins1;Gins2;Gins4;Gtf2h1;Gtf2h2;Gtf2h3;Gtf2h4;Gtf2h5;H1f0;H2afj;H2afv;H2afy2;Hist1h2af;Hmga2;Hp1bp3;Hspa1b;Ints3;Kat5;Lrwd1;Mad2l2;Ma…
Module4_esc	regulation_of_cellular_macromolecule_biosynthetic_process	1.32052e-05	0.000429391	14143	2341	2555	496	1.17282	0610031J06Rik;1500003O03Rik;2410022L05Rik;2610301G19Rik;4930447C04Rik;Abt1;Aco1;Actr8;Aebp1;Aff4;Agrn;Aire;Akirin2;Akt2;Ankrd1;Anxa3;Arhgef2;Arid1a;Arnt;Arntl;Arrb2;Asf1a;Asf1b;Asxl1;Atad2;Atf1;Atf6b;Atxn7l3;Aurkb;Axin1;Baz1a;Baz1b;Bcl10;Bcl3;Bcor;Bptf;Brca1;Brd4;Brd7;Brd8;Brms1;C1d;C80913;Cand1;Caprin2;Casc3;Cat;Cav1;Cbx5;Cby1;Cc2d1b;Ccar1;Ccdc59;Ccnh;Ccnk;Ccnl1;Ccnl2;Cdca7l;Cdk2;Cdk5rap3;Cdk8;C…
Module4_esc	regulation_of_primary_metabolic_process	1.40132e-05	0.000450603	14143	3191	2555	658	1.14143	0610031J06Rik;1500003O03Rik;2410022L05Rik;2610301G19Rik;4930447C04Rik;5033414D02Rik;Abhd5;Abi1;Abt1;Acadm;Acadvl;Aco1;Acsl1;Acsl5;Actr8;Adam9;Adap1;Aebp1;Aff4;Agrn;Ahcyl1;Aida;Aimp2;Aire;Akap1;Akirin2;Akt2;Ankrd1;Anxa3;Apoa2;Araf;Arfgap2;Arhgap1;Arhgef2;Arid1a;Arl2;Arl2bp;Arnt;Arntl;Arrb2;Asap2;Asf1a;Asf1b;Asxl1;Atad2;Atf1;Atf6b;Atg4b;Atp6ap2;Atxn7l3;Aurkb;Axin1;Bad;Baz1a;Baz1b;Bcl10;Bcl3;Bcor;Bi…
Module4_esc	intracellular_protein_transport	1.80926e-05	0.000575383	14143	352	2555	95	1.49393	1500003O03Rik;Agap3;Ahcyl1;Aip;Ap1b1;Ap1g1;Ap1m1;Ap2a2;Ap2b1;Ap3b1;Ap3d1;Ap3m1;Arfip1;Arfrp1;Arntl;Bbs2;Bcap29;Bcl3;Bid;Cep57;Copg2;Dag1;Derl1;Exoc4;Fam53a;Fxc1;Gas6;Gga1;Gga2;Golga4;Hdac6;Hgs;Ing1;Ipo13;Ipo9;Jun;Kif13a;Kpna1;Kpna3;Mgea5;Mrpl45;Nfkbia;Nup54;Nup98;Nxt1;Os9;Pex14;Pex19;Pex5;Pex7;Pick1;Pml;Pola2;Ppp3r1;Pttg1ip;Rab10;Rab6a;Rbm22;Sar1b;Scamp3;Scarb2;Sec23a;Sec23b;Smurf1;Snx1;Snx9;Srp5…
Module4_esc	protein_localization_to_organelle	1.83639e-05	0.000577664	14143	224	2555	66	1.63097	Agap3;Aip;Ap3b1;Ap3d1;Arfrp1;Arl2;Arl2bp;Arntl;Aurkb;Bbs2;Bcl3;Bid;Bub1b;Cep57;Ctdnep1;Dag1;Diap1;Dvl1;Fam53a;Fxc1;Golga4;Ing1;Ipo13;Ipo9;Jun;Kdelr2;Kpna1;Kpna3;Lrwd1;Mapre1;Morc3;Nfkbia;Nup98;Os9;Pex14;Pex19;Pex5;Pex7;Pml;Pola2;Ppp3r1;Pttg1ip;Rab6a;Rbm22;Scarb2;Smo;Srp54a;Stat3;Sun1;Timm10;Timm8a1;Timm9;Tinf2;Tmem188;Tmem30a;Tnpo3;Tomm34;Topors;Tor1aip1;Txnip;Ubl4;Wapal;Zfand6;Zfp828;Zw10;l7Rn6
Module4_esc	modification-dependent_macromolecule_catabolic_process	2.15635e-05	0.000671018	14143	238	2555	69	1.60481	Agap3;Amfr;Anapc2;Anapc4;Arih1;Arih2;Arrb2;Bap1;Ccnf;Cd2ap;Cdc26;Chfr;Cul2;Cul4a;Cul7;Derl1;Dnajc10;Dtl;Erlin2;Exosc9;Fbxo6;Fbxw11;Fbxw5;Fbxw8;Fzr1;Hdac6;Hectd1;Herc4;Jkamp;Lonp1;Man1b1;Nub1;Os9;Pcnp;Pnpt1;Rad23a;Rbbp6;Rnf4;Rnf40;Rnf5;Siah1b;Sirt1;Skp2;Smurf1;Tbl1x;Tceb1;Topors;Trpc4ap;Tsg101;Ube2d1;Ube3c;Ube4b;Uchl5;Ufd1l;Usp15;Usp16;Usp19;Usp21;Usp22;Usp28;Usp33;Usp36;Usp39;Usp4;Usp47;Usp48;Usp…
Module4_esc	small_molecule_metabolic_process	2.5579e-05	0.000787507	14143	1159	2555	262	1.25132	0610007P14Rik;2810405K02Rik;AI314976;Abcb1a;Abcg2;Abhd5;Acaa1a;Acaa2;Acadm;Acads;Acadvl;Aco1;Acsl1;Acsl3;Acsl5;Acy1;Ada;Adi1;Adipor2;Agpat1;Agpat2;Agpat6;Ahcyl1;Ak1;Ak3;Ak4;Akr1b8;Aldh9a1;Ampd2;Apoa2;Arf6;Arfrp1;Arl2;Arl4a;Asl;Asnsd1;Atad1;Atp1b1;Atp6v1a;Atp6v1c1;Bad;Bckdha;Bckdhb;Bckdk;Brca1;Car2;Car4;Cat;Cbr1;Cbr3;Cbs;Cept1;Chd1l;Chka;Cln6;Clpx;Cmas;Cmpk1;Coasy;Comt;Coq2;Coq7;Coq9;Crabp2;Crot;C…
Module4_esc	macromolecular_complex_subunit_organization	2.72701e-05	0.000830734	14143	655	2555	159	1.34371	2310016M24Rik;Acadm;Acads;Acat1;Aifm1;Ak3;Akap2;Alad;Amfr;Ap1b1;Ap2b1;Apoa2;Arid1a;Asf1a;Asf1b;Atf1;Atl2;Atxn2;Aurkb;Axin1;Baz1b;Bcl10;Bid;Cat;Cav1;Cenph;Cenpt;Cep57;Cirbp;Clint1;Cnot7;Cox15;Cpsf6;Cpsf7;Crnkl1;Cryab;Cuta;Cyba;Dcxr;Ddx6;Dhps;Dhrs4;Diap1;Dlgap3;Dnm1l;Dpysl3;Dync1h1;Ect2;Ehd4;Eid2;Eps15;Evl;Fam103a1;Gemin6;Gja1;Gls;Gpx3;Grb2;Grb7;Grhpr;H1f0;H2afj;H2afv;H2afy2;Hdac6;Higd2a;Hip1;Hist1…
Module4_esc	cellular_protein_catabolic_process	2.94496e-05	0.000887781	14143	262	2555	74	1.56344	Agap3;Amfr;Anapc2;Anapc4;Arih1;Arih2;Arrb2;Bap1;Bnip3;Ccnf;Cd2ap;Cdc26;Chfr;Clpx;Cul2;Cul4a;Cul7;Derl1;Dnajc10;Dtl;Erlin2;Fbxo6;Fbxw11;Fbxw5;Fbxw8;Fzr1;Hdac6;Hectd1;Herc4;Ide;Jkamp;Lonp1;Lonp2;Man1b1;Nub1;Os9;Pcnp;Ppt1;Psmb10;Rad23a;Rbbp6;Rnf4;Rnf40;Rnf5;Siah1b;Sirt1;Skp2;Smurf1;Tbl1x;Tceb1;Topors;Trpc4ap;Tsg101;Ube2d1;Ube3c;Ube4b;Uchl5;Ufd1l;Usp15;Usp16;Usp19;Usp21;Usp22;Usp28;Usp33;Usp36;Usp39;…
Module4_esc	regulation_of_nitrogen_compound_metabolic_process	3.03873e-05	0.000906607	14143	2536	2555	530	1.15685	0610031J06Rik;1500003O03Rik;2410022L05Rik;2610301G19Rik;4930447C04Rik;Abt1;Actr8;Adap1;Aebp1;Aff4;Agrn;Ahcyl1;Aire;Akirin2;Akt2;Ankrd1;Anxa3;Arfgap2;Arhgap1;Arhgef2;Arid1a;Arl2;Arnt;Arntl;Arrb2;Asap2;Asf1a;Asf1b;Asxl1;Atad2;Atf1;Atf6b;Atxn7l3;Aurkb;Axin1;Baz1a;Baz1b;Bcl10;Bcl3;Bcor;Bin1;Bptf;Brca1;Brd4;Brd7;Brd8;Bre;Brms1;C1d;C80913;Cand1;Caprin2;Cat;Cav1;Cbs;Cbx5;Cby1;Cc2d1b;Ccar1;Ccdc59;Ccnh;Cc…
Module5_esc	cellular_process	3.54556e-38	7.40668e-35	14143	8865	1418	1104	1.2421	0610009D07Rik;0610010K14Rik;1190003J15Rik;2700060E02Rik;Aaas;Aars;Aatf;Abcf1;Acin1;Acly;Aco2;Acot7;Actl6a;Actn1;Actr2;Actr3;Adam23;Add1;Adipor1;Adk;Adprh;Adrm1;Adsl;Adss;Aebp2;Aen;Aes;Agfg1;Ahctf1;Ahcy;Aim2;Aimp1;Ak2;Akap12;Akr1b3;Akr7a5;Akt1;Akt1s1;Aldh18a1;Alg13;Alpl;Alyref;Amotl2;Amt;Anapc13;Anapc5;Anln;Anxa1;Anxa7;Ap1m2;Ap1s1;Ap2a1;Ap3s1;Apex1;Api5;Aplp1;Aplp2;Apoc1;App;Arcn1;Arf4;Arf5;Arhgef…
Module5_esc	cellular_metabolic_process	6.22625e-35	6.50332e-32	14143	5514	1418	770	1.3928	0610009D07Rik;1190003J15Rik;2700060E02Rik;Aars;Abcf1;Acin1;Acly;Aco2;Acot7;Actl6a;Adipor1;Adk;Adprh;Adrm1;Adsl;Adss;Aebp2;Aes;Ahctf1;Ahcy;Ak2;Akap12;Akr1b3;Akr7a5;Akt1;Aldh18a1;Alg13;Alpl;Alyref;Amt;Anapc13;Anapc5;Anxa1;Apex1;Aplp1;Apoc1;App;Arid5b;Arl1;Ash2l;Asna1;Ass1;Atic;Atp1b3;Atp2a2;Atp2c1;Atp5g1;Atp5j;Atp5j2;Atp5k;Atp6v0b;Atp6v0c;Atp6v0d1;Atp6v1b2;Atp6v1g1;Aurkaip1;Avpi1;B2m;BC048355;Bag1;…
Module5_esc	metabolic_process	1.38394e-29	9.63684e-27	14143	6288	1418	831	1.31812	0610009D07Rik;1190003J15Rik;2700060E02Rik;Aars;Abcf1;Acat2;Acin1;Acly;Aco2;Acot7;Actl6a;Adam23;Add1;Adipor1;Adk;Adprh;Adrm1;Adsl;Adss;Aebp2;Aes;Ahctf1;Ahcy;Ak2;Akap12;Akr1b3;Akr7a5;Akt1;Aldh18a1;Aldh7a1;Alg13;Alpl;Alyref;Amt;Anapc13;Anapc5;Anxa1;Apex1;Aplp1;Aplp2;Apoc1;App;Arid5b;Arl1;Asah1;Ash2l;Asna1;Ass1;Atic;Atp1b3;Atp2a2;Atp2c1;Atp5g1;Atp5j;Atp5j2;Atp5k;Atp6v0b;Atp6v0c;Atp6v0d1;Atp6v1b2;Atp6…
Module5_esc	cellular_nitrogen_compound_metabolic_process	8.15101e-25	4.25687e-22	14143	2988	1418	456	1.52212	0610009D07Rik;1190003J15Rik;2700060E02Rik;Aars;Acin1;Actl6a;Adk;Adrm1;Adsl;Adss;Aebp2;Aes;Ahctf1;Ak2;Alyref;Apex1;Aplp1;App;Arid5b;Arl1;Ash2l;Asna1;Ass1;Atic;Atp1b3;Atp2a2;Atp2c1;Atp5g1;Atp5j;Atp5j2;Atp5k;Atp6v0b;Atp6v0c;Atp6v0d1;Atp6v1b2;Atp6v1g1;BC048355;Bcas2;Bccip;Bclaf1;Birc5;Blvrb;Bop1;Bzw2;Cad;Carm1;Cars;Cbx7;Ccne1;Ccrn4l;Cdc5l;Cdca7;Cdk9;Cdkn2a;Cdt1;Celf1;Cenpa;Cenpv;Chaf1b;Chd4;Chmp1a;Ch…
Module5_esc	nucleobase-containing_compound_metabolic_process	1.98956e-24	8.31238e-22	14143	2863	1418	440	1.53284	0610009D07Rik;1190003J15Rik;2700060E02Rik;Aars;Acin1;Actl6a;Adk;Adrm1;Adsl;Adss;Aebp2;Aes;Ahctf1;Ak2;Alyref;Apex1;Aplp1;App;Arid5b;Arl1;Ash2l;Asna1;Atic;Atp1b3;Atp2a2;Atp2c1;Atp5g1;Atp5j;Atp5j2;Atp5k;Atp6v0b;Atp6v0c;Atp6v0d1;Atp6v1b2;Atp6v1g1;BC048355;Bcas2;Bccip;Bclaf1;Birc5;Bop1;Bzw2;Cad;Carm1;Cars;Cbx7;Ccne1;Ccrn4l;Cdc5l;Cdca7;Cdk9;Cdkn2a;Cdt1;Celf1;Cenpa;Cenpv;Chaf1b;Chd4;Chmp1a;Churc1;Cmah;C…
Module5_esc	nitrogen_compound_metabolic_process	5.59839e-24	1.94917e-21	14143	3074	1418	463	1.50225	0610009D07Rik;1190003J15Rik;2700060E02Rik;Aars;Acin1;Actl6a;Adk;Adrm1;Adsl;Adss;Aebp2;Aes;Ahctf1;Ak2;Akr1b3;Akr7a5;Alyref;Apex1;Aplp1;App;Arid5b;Arl1;Ash2l;Asna1;Ass1;Atic;Atp1b3;Atp2a2;Atp2c1;Atp5g1;Atp5j;Atp5j2;Atp5k;Atp6v0b;Atp6v0c;Atp6v0d1;Atp6v1b2;Atp6v1g1;BC048355;Bcas2;Bccip;Bclaf1;Bgn;Birc5;Blvrb;Bop1;Bzw2;Cad;Carm1;Cars;Cbx7;Ccnd3;Ccne1;Ccrn4l;Cdc5l;Cdca7;Cdk9;Cdkn2a;Cdt1;Celf1;Cenpa;Cen…
Module5_esc	primary_metabolic_process	3.45477e-22	1.031e-19	14143	5545	1418	726	1.30587	0610009D07Rik;1190003J15Rik;2700060E02Rik;Aars;Abcf1;Acin1;Acly;Acot7;Actl6a;Adam23;Adipor1;Adk;Adprh;Adrm1;Adsl;Adss;Aebp2;Aes;Ahctf1;Ahcy;Ak2;Akr1b3;Akt1;Aldh18a1;Alg13;Alyref;Amt;Anapc13;Anapc5;Anxa1;Apex1;Aplp1;Aplp2;Apoc1;App;Arid5b;Arl1;Asah1;Ash2l;Asna1;Ass1;Atic;Atp1b3;Atp2a2;Atp2c1;Atp5g1;Atp5j;Atp5j2;Atp5k;Atp6v0b;Atp6v0c;Atp6v0d1;Atp6v1b2;Atp6v1g1;Avpi1;B2m;BC048355;Bag1;Bag6;Bcas2;Bca…
Module5_esc	generation_of_precursor_metabolites_and_energy	2.22534e-21	5.29756e-19	14143	214	1418	72	3.35571	Aco2;Adsl;Akt1;Bloc1s1;Cmah;Cs;Cyb5;Cyc1;Cyct;Dld;Dlst;Enox1;Etfa;Fads2;Idh2;Idh3a;Idh3b;Idh3g;Ldhb;Mdh1;Msh2;Mtfr1;Mybbp1a;Ndufa1;Ndufa10;Ndufa12;Ndufa13;Ndufa2;Ndufa3;Ndufa5;Ndufa6;Ndufa8;Ndufa9;Ndufab1;Ndufb10;Ndufb11;Ndufb2;Ndufb3;Ndufb5;Ndufb6;Ndufb7;Ndufb8;Ndufb9;Ndufc2;Ndufs1;Ndufs2;Ndufs3;Ndufs5;Ndufs6;Ndufs7;Ndufs8;Ndufv1;Ndufv2;Ndufv3;Pdha1;Pdhb;Pfkl;Pfkp;Ppp1cc;Ptges3;Sdha;Sdhb;Sdhc;Sd…
Module5_esc	electron_transport_chain	2.28234e-21	5.29756e-19	14143	108	1418	49	4.5252	Cmah;Cyb5;Cyc1;Cyct;Dld;Enox1;Etfa;Fads2;Mybbp1a;Ndufa1;Ndufa10;Ndufa12;Ndufa13;Ndufa2;Ndufa3;Ndufa5;Ndufa6;Ndufa8;Ndufa9;Ndufab1;Ndufb10;Ndufb11;Ndufb2;Ndufb3;Ndufb5;Ndufb6;Ndufb7;Ndufb8;Ndufb9;Ndufc2;Ndufs1;Ndufs2;Ndufs3;Ndufs5;Ndufs6;Ndufs7;Ndufs8;Ndufv1;Ndufv2;Ndufv3;Sdha;Sdhb;Sdhc;Sdhd;Txn2;Uqcrc1;Uqcrc2;Uqcrfs1;Uqcrq
Module5_esc	RNA_processing	2.82733e-18	5.9063e-16	14143	478	1418	112	2.33698	0610009D07Rik;Aars;Alyref;Aplp1;App;Bcas2;Bop1;Cdc5l;Cdkn2a;Celf1;Cwc15;D10Wsu52e;Dcaf13;Ddx1;Ddx39;Ddx54;Dhx15;Dkc1;Eftud2;Eif4a3;Emg1;Esrp1;Exosc10;Exosc3;Exosc8;Fcf1;Ftsj3;Gar1;Hnrnpc;Hnrpll;Imp3;Isy1;Lin28a;Lsm2;Lsm4;Lsm5;Magoh;Naa38;Nhp2;Nob1;Nop10;Nop14;Npm3;Nsa2;Nsun2;Nudt21;Pa2g4;Pabpn1;Papola;Pes1;Phf5a;Plrg1;Pnn;Ppie;Ppih;Ppil1;Ppp1r8;Prmt5;Prpf19;Prpf31;Prpf40a;Prpf8;Psip1;Puf60;Rbm17;…
Module5_esc	RNA_splicing	5.57426e-18	1.0586e-15	14143	215	1418	67	3.10815	0610009D07Rik;Alyref;Bcas2;Cdc5l;Celf1;Cwc15;D10Wsu52e;Ddx39;Dhx15;Eftud2;Eif4a3;Esrp1;Hnrnpc;Isy1;Lsm2;Lsm4;Lsm5;Magoh;Naa38;Phf5a;Plrg1;Pnn;Ppie;Ppih;Ppil1;Ppp1r8;Prmt5;Prpf19;Prpf31;Prpf40a;Prpf8;Psip1;Puf60;Rbm17;Rbm39;Rbmxl1;Rnps1;Sf1;Sf3a3;Sf3b1;Sf3b3;Sf3b4;Snrnp25;Snrnp40;Snrpa;Snrpa1;Snrpb2;Snrpc;Snrpd1;Snrpf;Snw1;Son;Srrm1;Srrm2;Srsf1;Srsf10;Srsf3;Srsf7;Srsf9;Strap;Syncrip;Tardbp;Thoc7;T…
Module5_esc	cellular_macromolecule_metabolic_process	7.27951e-17	1.26724e-14	14143	4112	1418	550	1.33406	0610009D07Rik;2700060E02Rik;Aars;Abcf1;Acin1;Actl6a;Adprh;Adrm1;Aebp2;Aes;Ahctf1;Akt1;Alyref;Anapc13;Anapc5;Anxa1;Apex1;Aplp1;Apoc1;App;Arid5b;Ash2l;Avpi1;B2m;Bag1;Bag6;Bcas2;Bccip;Bclaf1;Bgn;Birc5;Bloc1s1;Bnip3l;Bop1;Bzw2;Cad;Calca;Canx;Carm1;Cars;Cbx7;Ccnb1;Ccnd1;Ccnd3;Ccne1;Ccrn4l;Cd81;Cdc16;Cdc20;Cdc34;Cdc5l;Cdca7;Cdk9;Cdkn2a;Cdt1;Celf1;Cenpa;Cenpv;Chaf1b;Chd4;Chmp1a;Churc1;Clk1;Clpp;Cltc;Cop…
Module5_esc	cell_cycle	2.03223e-16	3.26564e-14	14143	781	1418	152	1.94114	Actr2;Actr3;Ahctf1;Akt1;Anapc13;Anapc5;Anln;Anxa1;App;Arpp19;Avpi1;Bag6;Bccip;Bex2;Birc5;Bub3;Calm3;Ccna2;Ccnb1;Ccnb2;Ccnd1;Ccnd3;Ccne1;Ccng1;Cdc16;Cdc20;Cdc34;Cdc5l;Cdca3;Cdca8;Cdkn2a;Cdt1;Cenpa;Cenpv;Cetn3;Chaf1b;Chd3;Chmp1a;Cks2;Cltc;Csnk1a1;Csnk2a1;Cul3;Cul4b;D2Ertd750e;Dbf4;Dctn2;Dctn3;Dnajc2;E2f4;Eif4e;Ensa;Ezh2;Fbxo5;Gadd45a;Gmnn;Gnai3;H2afx;Haus1;Hdac3;Hells;Hjurp;Hormad1;Hras1;Ilk;Incenp…
Module5_esc	mRNA_processing	2.5009e-16	3.7317e-14	14143	281	1418	76	2.69757	0610009D07Rik;Alyref;Aplp1;App;Bcas2;Cdc5l;Celf1;Cwc15;Ddx1;Ddx39;Dhx15;Eftud2;Eif4a3;Esrp1;Hnrnpc;Hnrpll;Isy1;Lsm2;Lsm4;Lsm5;Magoh;Naa38;Nudt21;Pabpn1;Papola;Phf5a;Plrg1;Pnn;Ppie;Ppih;Ppil1;Ppp1r8;Prmt5;Prpf19;Prpf31;Prpf40a;Prpf8;Psip1;Puf60;Rbm17;Rbm39;Rbmxl1;Rnps1;Sf1;Sf3a3;Sf3b1;Sf3b3;Sf3b4;Slbp;Snrnp25;Snrnp40;Snrpa;Snrpa1;Snrpb2;Snrpc;Snrpd1;Snrpf;Snw1;Son;Srrm1;Srrm2;Srsf1;Srsf10;Srsf3;Sr…
Module5_esc	macromolecule_metabolic_process	3.24873e-16	4.52439e-14	14143	4465	1418	585	1.30677	0610009D07Rik;2700060E02Rik;Aars;Abcf1;Acin1;Actl6a;Adam23;Add1;Adprh;Adrm1;Aebp2;Aes;Ahctf1;Akt1;Alyref;Anapc13;Anapc5;Anxa1;Apex1;Aplp1;Apoc1;App;Arid5b;Ash2l;Avpi1;B2m;Bag1;Bag6;Bcas2;Bccip;Bclaf1;Bgn;Birc5;Bloc1s1;Bnip3l;Bop1;Bzw2;Cad;Calca;Canx;Carm1;Cars;Cbx7;Ccnb1;Ccnd1;Ccnd3;Ccne1;Ccrn4l;Cd81;Cdc16;Cdc20;Cdc34;Cdc5l;Cdca7;Cdh1;Cdk9;Cdkn2a;Cdt1;Celf1;Cenpa;Cenpv;Chaf1b;Chd4;Chmp1a;Churc1;C…
Module5_esc	nucleic_acid_metabolic_process	4.41713e-16	5.76712e-14	14143	2400	1418	354	1.47115	0610009D07Rik;2700060E02Rik;Aars;Acin1;Actl6a;Adrm1;Aebp2;Aes;Ahctf1;Alyref;Apex1;Aplp1;App;Arid5b;Ash2l;Bcas2;Bccip;Bclaf1;Birc5;Bop1;Bzw2;Carm1;Cars;Cbx7;Ccne1;Ccrn4l;Cdc5l;Cdca7;Cdk9;Cdkn2a;Cdt1;Celf1;Cenpa;Cenpv;Chaf1b;Chd4;Chmp1a;Churc1;Csnk2a1;Ctbp1;Ctcf;Ctnnd1;Cul4b;Cwc15;D10Wsu52e;Dars;Dbf4;Dcaf13;Ddx1;Ddx17;Ddx39;Ddx54;Dhx15;Dkc1;Dnajb11;Dnajc2;Dnmt1;Dnmt3a;Dnmt3b;Dnttip2;Dppa2;Dppa4;Dpy…
Module5_esc	mRNA_metabolic_process	4.98839e-16	6.12985e-14	14143	326	1418	83	2.53937	0610009D07Rik;Alyref;Aplp1;App;Bcas2;Ccrn4l;Cdc5l;Celf1;Cwc15;Ddx1;Ddx39;Dhx15;Dnajb11;Eftud2;Eif4a3;Esrp1;Etf1;Exosc10;Exosc3;Gspt1;Hnrnpc;Hnrpdl;Hnrpll;Isy1;Lsm2;Lsm4;Lsm5;Magoh;Naa38;Nudt21;Pabpn1;Papola;Phf5a;Plrg1;Pnn;Ppie;Ppih;Ppil1;Ppp1r8;Prmt5;Prpf19;Prpf31;Prpf40a;Prpf8;Psip1;Puf60;Rbm17;Rbm39;Rbmxl1;Rnps1;Sf1;Sf3a3;Sf3b1;Sf3b3;Sf3b4;Slbp;Snrnp25;Snrnp40;Snrpa;Snrpa1;Snrpb2;Snrpc;Snrpd1;…
Module5_esc	gene_expression	1.7855e-15	2.07218e-13	14143	2319	1418	342	1.47093	0610009D07Rik;2700060E02Rik;Aars;Abcf1;Actl6a;Adrm1;Aebp2;Aes;Ahctf1;Akt1;Alyref;Apex1;Aplp1;App;Arid5b;Ash2l;Bcas2;Bclaf1;Birc5;Bop1;Carm1;Cars;Cbx7;Cdc5l;Cdca7;Cdk9;Cdkn2a;Celf1;Chaf1b;Chd4;Chmp1a;Churc1;Cpe;Csnk2a1;Ctbp1;Ctcf;Ctnnd1;Cwc15;D10Wsu52e;Dars;Dcaf13;Ddost;Ddx1;Ddx17;Ddx39;Ddx54;Denr;Dhcr24;Dhx15;Dkc1;Dnajc2;Dnmt1;Dnmt3a;Dnttip2;Dppa2;Dppa4;Dpy30;Drap1;E2f4;Eed;Eef1e1;Eftud2;Egr1;Eif…
Module5_esc	cellular_component_organization_or_biogenesis	5.03508e-13	5.53594e-11	14143	2691	1418	374	1.38619	0610010K14Rik;Aatf;Acin1;Actl6a;Actn1;Actr2;Actr3;Add1;Adrm1;Adsl;Aebp2;Agfg1;Ahctf1;Akt1;Akt1s1;Anapc13;Anapc5;Anln;Anxa5;Anxa7;Aplp1;Aplp2;Apoa1bp;Apoc1;App;Arl1;Arpc1a;Arpc1b;Arpc3;Arpc4;Arpc5;Arpp19;Ash2l;Atp2c1;Atp6v0c;Atxn10;Bag6;Bak1;Birc5;Bnip3l;Bop1;Bub3;Calca;Cald1;Capg;Capza2;Carm1;Cbx7;Ccna2;Ccnb1;Ccnb2;Ccng1;Ccrn4l;Cd24a;Cd9;Cdc16;Cdc20;Cdca3;Cdca8;Cdh1;Cdkn2a;Celf1;Cenpa;Cenpv;Cetn3…
Module5_esc	cellular_component_organization_or_biogenesis_at_cellular_level	6.65214e-13	6.94816e-11	14143	2243	1418	322	1.43183	0610010K14Rik;Aatf;Acin1;Actl6a;Actn1;Actr2;Actr3;Add1;Adrm1;Aebp2;Agfg1;Ahctf1;Akt1;Anapc13;Anapc5;Anln;Aplp1;Aplp2;App;Arl1;Arpc4;Arpp19;Ash2l;Atp2c1;Atp6v0c;Atxn10;Bag6;Bak1;Birc5;Bnip3l;Bop1;Bub3;Cald1;Capg;Capza2;Carm1;Cbx7;Ccna2;Ccnb1;Ccnb2;Ccng1;Ccrn4l;Cd24a;Cd9;Cdc16;Cdc20;Cdca3;Cdca8;Cdh1;Cdkn2a;Celf1;Cenpa;Cenpv;Cetn3;Chaf1b;Chchd3;Chd3;Chd4;Chmp1a;Cltc;Col18a1;Col1a1;Col1a2;Coro1b;Coro…
Module5_esc	cellular_component_biogenesis	1.86783e-12	1.85805e-10	14143	1076	1418	179	1.65923	Aatf;Actn1;Add1;Adrm1;Adsl;Agfg1;Ahctf1;Anxa5;Apoa1bp;App;Arpc4;Bag6;Bop1;Cald1;Capg;Ccnb1;Ccrn4l;Cd9;Cdh1;Cdkn2a;Celf1;Cenpa;Cenpv;Chaf1b;Clpp;Cltc;Col1a1;Col1a2;Coro1c;Ctcf;Ctnna1;Ctsd;Cul3;Cyfip1;Dbnl;Dcaf13;Dkc1;E2f4;Ehd1;Eif2a;Eif3a;Eif4a3;Eif6;Emg1;Exosc10;Exosc3;Exosc8;Ezr;Fbxo5;Fcf1;Ftsj3;Gar1;Glul;Gmnn;Gnl2;Gnl3;Gsn;Gtf2a2;H2-Ke2;H2afx;H2afy;Haus1;Hdac3;Hells;Hjurp;Hmox1;Hormad1;Hprt;Hra…
Module5_esc	oxidation-reduction_process	2.0346e-12	1.93194e-10	14143	682	1418	127	1.85731	Aco2;Adipor1;Adsl;Akr1b3;Akr7a5;Akt1;Aldh18a1;Aldh7a1;Apex1;Bloc1s1;Blvrb;Cmah;Cox7a2;Cox7a2l;Cox7b;Cs;Ctbp1;Cyb5;Cyb5r3;Cyc1;Cyct;Degs1;Dhcr24;Dld;Dlst;Dohh;Echs1;Eci2;Enox1;Etfa;Fads2;Fasn;Gldc;Glrx5;Glud1;Glyr1;Gsr;Gsto1;Hadh;Hibadh;Hmox1;Hsd17b10;Hsd17b12;Idh2;Idh3a;Idh3b;Idh3g;Ifi30;Impdh2;Kdm5b;Ldhb;Lox;Mdh1;Mtfr1;Mthfd1;Mthfd1l;Mthfd2;Mybbp1a;Ndufa1;Ndufa10;Ndufa12;Ndufa13;Ndufa2;Ndufa3;Nd…
Module5_esc	cell_division	2.73771e-12	2.38454e-10	14143	357	1418	80	2.23505	Aatf;Actr2;Actr3;Ahctf1;Anapc13;Anapc5;Anln;Arpp19;Birc5;Bub3;Ccna2;Ccnb1;Ccnb2;Ccnd1;Ccnd3;Ccne1;Ccng1;Cdc16;Cdc20;Cdca3;Cdca7;Cdca8;Cdkn2a;Cenpv;Cetn3;Chmp1a;Cks2;Csnk1a1;Cul3;D2Ertd750e;Dctn3;Dppa3;Ensa;Fbxo5;Gnai3;Haus1;Hells;Incenp;Klhl13;Lig1;Mad2l1;Maea;Mcm5;Myh10;Myh9;Nanog;Ncapd2;Nsun2;Nup43;Pafah1b1;Plk1;Ppp1cc;Ppp2r2d;Psrc1;Pttg1;Rab11a;Rad21;Rcc1;Rhoa;Rhoc;Ruvbl1;Sept1;Sept11;Sept2;Se…
Module5_esc	cell_cycle_process	2.73954e-12	2.38454e-10	14143	555	1418	109	1.95884	Actr2;Actr3;Ahctf1;Akt1;Anapc13;Anapc5;Anln;App;Arpp19;Bag6;Birc5;Bub3;Ccna2;Ccnb1;Ccnb2;Ccnd1;Ccng1;Cdc16;Cdc20;Cdca3;Cdca8;Cdkn2a;Cenpa;Cenpv;Cetn3;Chd3;Chmp1a;Cks2;Cltc;Csnk1a1;Cul3;D2Ertd750e;Dbf4;Dctn2;Dctn3;Dnajc2;E2f4;Eif4e;Ensa;Ezh2;Fbxo5;Gadd45a;H2afx;Haus1;Hdac3;Hells;Hormad1;Hras1;Ilk;Incenp;Inhba;Klhl13;Lmnb1;Macf1;Mad2l1;Mdm2;Mki67;Msh2;Msh6;Mybl2;Myh10;Myh9;Ncapd2;Nsun2;Nup43;Pafah1…
Module5_esc	ribonucleoprotein_complex_biogenesis	4.85002e-12	4.05268e-10	14143	199	1418	54	2.70649	Aatf;Bop1;Ccrn4l;Cdkn2a;Celf1;Dcaf13;Dkc1;Eif2a;Eif3a;Eif4a3;Eif6;Emg1;Exosc10;Exosc3;Exosc8;Fcf1;Ftsj3;Gar1;Gnl2;Gnl3;Imp3;Ipo4;Lsm14a;Lsm2;Mrto4;Nhp2;Nmd3;Nob1;Nop10;Nop14;Nop58;Npm3;Nsa2;Pa2g4;Pes1;Pih1d1;Prmt5;Prpf19;Prpf31;Psip1;Pum2;Rbmxl1;Rpf1;Rrp1;Rrp9;Rrs1;Sbds;Snrpc;Srsf1;Srsf10;Tarbp2;Tsr1;Utp11l;Wdr12
Module5_esc	heterocycle_metabolic_process	2.10079e-11	1.63966e-09	14143	544	1418	105	1.92511	1190003J15Rik;Adk;Adsl;Adss;Ak2;Aldh18a1;Arl1;Asna1;Atic;Atp1b3;Atp2a2;Atp2c1;Atp5g1;Atp5j;Atp5j2;Atp5k;Atp6v0b;Atp6v0c;Atp6v0d1;Atp6v1b2;Atp6v1g1;Blvrb;Cad;Crmp1;Ctps;Dcakd;Dld;Dlst;Dnmt1;Dnmt3a;Dnmt3b;Dtymk;Folr1;Gart;Glyr1;Gnai3;Gnl2;Gnl3;Guk1;Hibadh;Hmox1;Hprt;Hras1;Idh3a;Idh3b;Idh3g;Impdh2;Itpa;Ldhb;Macf1;Mapk1;Mat2a;Mdh1;Mmadhc;Mras;Msh2;Msh6;Mthfd1;Mthfd1l;Mthfd2;Myh10;Myh9;Ndufs1;Nme1;Nme…
Module5_esc	cellular_component_biogenesis_at_cellular_level	2.11923e-11	1.63966e-09	14143	212	1418	55	2.58757	Aatf;Bop1;Ccrn4l;Cdkn2a;Celf1;Dcaf13;Dkc1;Eif2a;Eif3a;Eif4a3;Eif6;Emg1;Exosc10;Exosc3;Exosc8;Fcf1;Ftsj3;Gar1;Gnl2;Gnl3;Imp3;Ipo4;Lsm14a;Lsm2;Mrto4;Nhp2;Nmd3;Nob1;Nop10;Nop14;Nop58;Npm3;Nsa2;Pa2g4;Pes1;Pih1d1;Prmt5;Prpf19;Prpf31;Psip1;Pum2;Rbmxl1;Rpf1;Rrp1;Rrp9;Rrs1;Sbds;Snrpc;Spnb2;Srsf1;Srsf10;Tarbp2;Tsr1;Utp11l;Wdr12
Module5_esc	cell_cycle_phase	3.25525e-11	2.40206e-09	14143	449	1418	91	2.02144	Ahctf1;Akt1;Anapc13;Anapc5;Anln;App;Arpp19;Bag6;Birc5;Bub3;Ccna2;Ccnb1;Ccnb2;Ccnd1;Ccng1;Cdc16;Cdc20;Cdca3;Cdca8;Cdkn2a;Cenpv;Cetn3;Chd3;Chmp1a;Cks2;Cltc;Csnk1a1;Cul3;D2Ertd750e;Dbf4;Dctn2;Dctn3;Dnajc2;E2f4;Eif4e;Ensa;Ezh2;Fbxo5;H2afx;Haus1;Hdac3;Hells;Hormad1;Incenp;Inhba;Klhl13;Lmnb1;Mad2l1;Mdm2;Mki67;Msh2;Msh6;Mybl2;Myh9;Ncapd2;Nsun2;Nup43;Pafah1b1;Pes1;Plk1;Plk2;Ppp2r2d;Psmd13;Psrc1;Pttg1;Rad…
Module5_esc	organelle_organization	3.3346e-11	2.40206e-09	14143	1486	1418	225	1.51018	0610010K14Rik;Acin1;Actl6a;Actn1;Actr2;Add1;Aebp2;Agfg1;Ahctf1;Akt1;Anapc13;Anapc5;Anln;Arl1;Arpc4;Arpp19;Ash2l;Atp2c1;Atp6v0c;Bag6;Bak1;Birc5;Bnip3l;Bub3;Cald1;Capza2;Carm1;Cbx7;Ccna2;Ccnb1;Ccnb2;Ccng1;Cd24a;Cdc16;Cdc20;Cdca3;Cdca8;Cdkn2a;Cenpa;Cenpv;Cetn3;Chaf1b;Chchd3;Chd3;Chd4;Chmp1a;Cltc;Coro1b;Coro1c;Csnk1a1;Csrp1;Ctbp1;Ctcf;Ctsd;Cul3;D2Ertd750e;Dap3;Dbnl;Dctn2;Dctn3;Dnajb6;Dnajc2;Dnmt1;Dnm…
Module5_esc	translation	4.08209e-11	2.8425e-09	14143	389	1418	82	2.10247	Aars;Abcf1;Akt1;Cars;Dars;Ddost;Denr;Eef1e1;Eftud2;Eif1a;Eif1ax;Eif2a;Eif2b5;Eif2d;Eif2s1;Eif2s3x;Eif3a;Eif3b;Eif3f;Eif3g;Eif4a3;Eif4e;Eif4e2;Eif4h;Eif5;Eif6;Elof1;Eprs;Etf1;Farsa;Farsb;Galnt1;Ganab;Gspt1;Hars;Iars;Ict1;Krtcap2;Lars;Mars;Mrpl11;Mrpl12;Mrpl13;Mrpl15;Mrpl17;Mrpl2;Mrpl20;Mrpl21;Mrpl22;Mrpl24;Mrpl28;Mrpl3;Mrpl33;Mrpl34;Mrpl36;Mrpl37;Mrpl4;Mrpl9;Mrps15;Mrps16;Mrps17;Mrps18b;Mrps21;Mrp…
Module5_esc	RNA_metabolic_process	7.35727e-11	4.95785e-09	14143	2006	1418	285	1.41703	0610009D07Rik;2700060E02Rik;Aars;Actl6a;Adrm1;Aebp2;Aes;Ahctf1;Alyref;Apex1;Aplp1;App;Arid5b;Ash2l;Bcas2;Bclaf1;Birc5;Bop1;Bzw2;Carm1;Cars;Cbx7;Ccrn4l;Cdc5l;Cdca7;Cdk9;Cdkn2a;Celf1;Chaf1b;Chd4;Chmp1a;Churc1;Csnk2a1;Ctbp1;Ctcf;Ctnnd1;Cwc15;D10Wsu52e;Dars;Dcaf13;Ddx1;Ddx17;Ddx39;Ddx54;Dhx15;Dkc1;Dnajb11;Dnajc2;Dnmt1;Dnmt3a;Dnttip2;Dppa2;Dppa4;Dpy30;Drap1;E2f4;Eed;Eftud2;Egr1;Eif2b5;Eif4a3;Eif5;Elof…
Module5_esc	mitotic_cell_cycle	9.01664e-11	5.88618e-09	14143	361	1418	77	2.1274	Ahctf1;Akt1;Anapc13;Anapc5;Anln;App;Arpp19;Birc5;Bub3;Ccna2;Ccnb1;Ccnb2;Ccnd1;Ccng1;Cdc16;Cdc20;Cdca3;Cdca8;Cdkn2a;Cenpa;Cenpv;Cetn3;Chmp1a;Cltc;Csnk1a1;Cul3;D2Ertd750e;Dbf4;Dctn2;Dctn3;Dnajc2;E2f4;Eif4e;Ensa;Ezh2;Fbxo5;Haus1;Hells;Incenp;Inhba;Klhl13;Lmnb1;Mad2l1;Mdm2;Mybl2;Ncapd2;Nsun2;Nup43;Pafah1b1;Pes1;Plk1;Plk2;Ppp2r2d;Psrc1;Pttg1;Rad21;Rcc1;Rhoa;Rnf2;Rrs1;Ruvbl1;Sept2;Sept7;Setd8;Smc4;Stra…
Module5_esc	small_molecule_metabolic_process	1.02575e-10	6.49331e-09	14143	1159	1418	183	1.57483	1190003J15Rik;Aars;Acly;Aco2;Acot7;Adipor1;Adk;Adsl;Adss;Ahcy;Ak2;Akr1b3;Aldh18a1;Amt;Aplp2;Apoc1;App;Arl1;Asna1;Ass1;Atic;Atp1b3;Atp2a2;Atp2c1;Atp5g1;Atp5j;Atp5j2;Atp5k;Atp6v0b;Atp6v0c;Atp6v0d1;Atp6v1b2;Atp6v1g1;BC048355;Bcat1;Bcat2;Cad;Cars;Cmah;Crmp1;Cs;Ctps;Cyb5;Cyb5r3;Dars;Dcakd;Ddah2;Degs1;Dhcr24;Dld;Dlst;Dnmt1;Dnmt3a;Dnmt3b;Dohh;Dtymk;Ech1;Echs1;Eci2;Enpp3;Eprs;Fabp3;Fabp5;Fads2;Farsa;Fars…
Module5_esc	cellular_respiration	1.79351e-10	1.10196e-08	14143	65	1418	26	3.98956	Aco2;Adsl;Bloc1s1;Cs;Dld;Dlst;Idh2;Idh3a;Idh3b;Idh3g;Mdh1;Mtfr1;Mybbp1a;Ndufa5;Ndufb8;Ndufc2;Ndufs1;Ndufv2;Sdha;Sdhb;Sdhc;Sdhd;Sucla2;Suclg1;Tbrg4;Uqcrc1
Module5_esc	nucleobase-containing_small_molecule_metabolic_process	2.13521e-10	1.27441e-08	14143	500	1418	96	1.91499	1190003J15Rik;Adk;Adsl;Adss;Ak2;Arl1;Asna1;Atic;Atp1b3;Atp2a2;Atp2c1;Atp5g1;Atp5j;Atp5j2;Atp5k;Atp6v0b;Atp6v0c;Atp6v0d1;Atp6v1b2;Atp6v1g1;BC048355;Cad;Cmah;Crmp1;Ctps;Dcakd;Dlst;Dnmt1;Dnmt3a;Dnmt3b;Dtymk;Enpp3;Gart;Glyr1;Gnai3;Gnl2;Gnl3;Guk1;Hibadh;Hprt;Hras1;Idh3a;Idh3b;Idh3g;Impdh2;Itpa;Ldhb;Macf1;Mapk1;Mat2a;Mdh1;Mras;Msh2;Msh6;Mthfd1;Myh10;Myh9;Ndufs1;Nme1;Nme4;Nt5c;Nudt1;Ola1;Pcmt1;Pgd;Pgls;…
Module5_esc	M_phase	2.20978e-10	1.28229e-08	14143	354	1418	75	2.11312	Ahctf1;Anapc13;Anapc5;Anln;Arpp19;Bag6;Birc5;Bub3;Ccna2;Ccnb1;Ccnb2;Ccng1;Cdc16;Cdc20;Cdca3;Cdca8;Cenpv;Cetn3;Chd3;Chmp1a;Cks2;Cltc;Csnk1a1;Cul3;D2Ertd750e;Dctn2;Dctn3;Ensa;Fbxo5;H2afx;Haus1;Hdac3;Hells;Hormad1;Incenp;Klhl13;Mad2l1;Mki67;Msh2;Msh6;Mybl2;Myh9;Ncapd2;Nsun2;Nup43;Pafah1b1;Pes1;Plk1;Plk2;Ppp2r2d;Psmd13;Psrc1;Pttg1;Rad21;Rcc1;Rhoa;Rpa1;Rrs1;Ruvbl1;Sept2;Sept7;Setd8;Smc4;Stra13;Syce2;T…
Module5_esc	aerobic_respiration	3.20348e-10	1.80867e-08	14143	30	1418	17	5.65188	Aco2;Adsl;Bloc1s1;Cs;Dlst;Idh2;Idh3a;Idh3b;Idh3g;Mdh1;Mtfr1;Sdha;Sdhb;Sdhc;Sdhd;Sucla2;Suclg1
Module5_esc	mitosis	3.84599e-10	2.06007e-08	14143	240	1418	57	2.3688	Ahctf1;Anapc13;Anapc5;Anln;Arpp19;Birc5;Bub3;Ccna2;Ccnb1;Ccnb2;Ccng1;Cdc16;Cdc20;Cdca3;Cdca8;Cenpv;Cetn3;Chmp1a;Cltc;Csnk1a1;Cul3;D2Ertd750e;Dctn2;Dctn3;Ensa;Fbxo5;Haus1;Hells;Incenp;Klhl13;Mad2l1;Mybl2;Ncapd2;Nsun2;Nup43;Pafah1b1;Pes1;Plk1;Ppp2r2d;Psrc1;Pttg1;Rad21;Rcc1;Rhoa;Rrs1;Ruvbl1;Sept2;Sept7;Setd8;Smc4;Stra13;Terf1;Tipin;Tpx2;Tubb3;Ube2c;Zwint
Module5_esc	nuclear_division	3.84599e-10	2.06007e-08	14143	240	1418	57	2.3688	Ahctf1;Anapc13;Anapc5;Anln;Arpp19;Birc5;Bub3;Ccna2;Ccnb1;Ccnb2;Ccng1;Cdc16;Cdc20;Cdca3;Cdca8;Cenpv;Cetn3;Chmp1a;Cltc;Csnk1a1;Cul3;D2Ertd750e;Dctn2;Dctn3;Ensa;Fbxo5;Haus1;Hells;Incenp;Klhl13;Mad2l1;Mybl2;Ncapd2;Nsun2;Nup43;Pafah1b1;Pes1;Plk1;Ppp2r2d;Psrc1;Pttg1;Rad21;Rcc1;Rhoa;Rrs1;Ruvbl1;Sept2;Sept7;Setd8;Smc4;Stra13;Terf1;Tipin;Tpx2;Tubb3;Ube2c;Zwint
Module5_esc	organelle_fission	4.79692e-10	2.50519e-08	14143	254	1418	59	2.31677	Ahctf1;Anapc13;Anapc5;Anln;Arpp19;Birc5;Bub3;Ccna2;Ccnb1;Ccnb2;Ccng1;Cdc16;Cdc20;Cdca3;Cdca8;Cenpv;Cetn3;Chmp1a;Cltc;Csnk1a1;Cul3;D2Ertd750e;Dctn2;Dctn3;Ensa;Fbxo5;Fis1;Haus1;Hells;Incenp;Klhl13;Mad2l1;Mff;Mybl2;Ncapd2;Nsun2;Nup43;Pafah1b1;Pes1;Plk1;Ppp2r2d;Psrc1;Pttg1;Rad21;Rcc1;Rhoa;Rrs1;Ruvbl1;Sept2;Sept7;Setd8;Smc4;Stra13;Terf1;Tipin;Tpx2;Tubb3;Ube2c;Zwint
Module5_esc	tricarboxylic_acid_cycle	5.76372e-10	2.93668e-08	14143	21	1418	14	6.64927	Aco2;Cs;Dlst;Idh2;Idh3a;Idh3b;Idh3g;Mdh1;Sdha;Sdhb;Sdhc;Sdhd;Sucla2;Suclg1
Module5_esc	cellular_biosynthetic_process	8.53673e-10	4.24601e-08	14143	2562	1418	343	1.3353	2700060E02Rik;Aars;Abcf1;Acly;Actl6a;Adk;Adrm1;Adsl;Adss;Aebp2;Aes;Ahctf1;Ak2;Akr1b3;Akt1;Aldh18a1;Apex1;Arid5b;Ash2l;Ass1;Atic;Atp2a2;Atp2c1;Atp5g1;Atp5j;Atp5j2;Atp5k;Bcat1;Bcat2;Bclaf1;Birc5;Cad;Carm1;Cars;Cbx7;Ccne1;Cd81;Cdc5l;Cdca7;Cdipt;Cdk9;Cdkn2a;Cdt1;Chaf1b;Chd4;Chmp1a;Churc1;Csnk2a1;Ctbp1;Ctcf;Ctnnd1;Ctps;Dars;Dbf4;Dcakd;Ddost;Ddt;Ddx1;Ddx17;Ddx54;Degs1;Denr;Dld;Dnajc2;Dnmt1;Dnmt3a;Dntti…
Module5_esc	M_phase_of_mitotic_cell_cycle	8.86896e-10	4.30867e-08	14143	245	1418	57	2.32046	Ahctf1;Anapc13;Anapc5;Anln;Arpp19;Birc5;Bub3;Ccna2;Ccnb1;Ccnb2;Ccng1;Cdc16;Cdc20;Cdca3;Cdca8;Cenpv;Cetn3;Chmp1a;Cltc;Csnk1a1;Cul3;D2Ertd750e;Dctn2;Dctn3;Ensa;Fbxo5;Haus1;Hells;Incenp;Klhl13;Mad2l1;Mybl2;Ncapd2;Nsun2;Nup43;Pafah1b1;Pes1;Plk1;Ppp2r2d;Psrc1;Pttg1;Rad21;Rcc1;Rhoa;Rrs1;Ruvbl1;Sept2;Sept7;Setd8;Smc4;Stra13;Terf1;Tipin;Tpx2;Tubb3;Ube2c;Zwint
Module5_esc	biosynthetic_process	1.22142e-09	5.79898e-08	14143	2659	1418	353	1.3241	2700060E02Rik;Aars;Abcf1;Acly;Actl6a;Adk;Adrm1;Adsl;Adss;Aebp2;Aes;Ahctf1;Ak2;Akr1b3;Akt1;Aldh18a1;Apex1;Arid5b;Ash2l;Ass1;Atic;Atp2a2;Atp2c1;Atp5g1;Atp5j;Atp5j2;Atp5k;Bcat1;Bcat2;Bclaf1;Birc5;Cad;Carm1;Cars;Cbx7;Ccnd3;Ccne1;Cd81;Cdc5l;Cdca7;Cdipt;Cdk9;Cdkn2a;Cdt1;Chaf1b;Chd4;Chmp1a;Churc1;Col1a1;Csnk2a1;Ctbp1;Ctcf;Ctnnd1;Ctps;Cyb5r3;Dars;Dbf4;Dcakd;Ddost;Ddt;Ddx1;Ddx17;Ddx54;Degs1;Denr;Dhcr24;Dl…
Module5_esc	acetyl-CoA_catabolic_process	1.43844e-09	6.67755e-08	14143	22	1418	14	6.34703	Aco2;Cs;Dlst;Idh2;Idh3a;Idh3b;Idh3g;Mdh1;Sdha;Sdhb;Sdhc;Sdhd;Sucla2;Suclg1
Module5_esc	cellular_component_organization	2.25816e-09	1.0255e-07	14143	2565	1418	341	1.32597	0610010K14Rik;Acin1;Actl6a;Actn1;Actr2;Actr3;Add1;Adrm1;Adsl;Aebp2;Agfg1;Ahctf1;Akt1;Akt1s1;Anapc13;Anapc5;Anln;Anxa5;Anxa7;Aplp1;Aplp2;Apoa1bp;Apoc1;App;Arl1;Arpc1a;Arpc1b;Arpc3;Arpc4;Arpc5;Arpp19;Ash2l;Atp2c1;Atp6v0c;Atxn10;Bag6;Bak1;Birc5;Bnip3l;Bub3;Calca;Cald1;Capg;Capza2;Carm1;Cbx7;Ccna2;Ccnb1;Ccnb2;Ccng1;Ccrn4l;Cd24a;Cd9;Cdc16;Cdc20;Cdca3;Cdca8;Cdh1;Cdkn2a;Celf1;Cenpa;Cenpv;Cetn3;Chaf1b;Ch…
Module5_esc	cellular_component_organization_at_cellular_level	3.75289e-09	1.66804e-07	14143	2124	1418	290	1.36179	0610010K14Rik;Acin1;Actl6a;Actn1;Actr2;Actr3;Add1;Adrm1;Aebp2;Agfg1;Ahctf1;Akt1;Anapc13;Anapc5;Anln;Aplp1;Aplp2;App;Arl1;Arpc4;Arpp19;Ash2l;Atp2c1;Atp6v0c;Atxn10;Bag6;Bak1;Birc5;Bnip3l;Bub3;Cald1;Capg;Capza2;Carm1;Cbx7;Ccna2;Ccnb1;Ccnb2;Ccng1;Ccrn4l;Cd24a;Cd9;Cdc16;Cdc20;Cdca3;Cdca8;Cdh1;Cdkn2a;Celf1;Cenpa;Cenpv;Cetn3;Chaf1b;Chchd3;Chd3;Chd4;Chmp1a;Cltc;Col18a1;Col1a1;Col1a2;Coro1b;Coro1c;Csnk1a1…
Module5_esc	nucleoside_phosphate_metabolic_process	4.59079e-09	1.95717e-07	14143	463	1418	87	1.87415	Adk;Adsl;Adss;Ak2;Arl1;Asna1;Atic;Atp1b3;Atp2a2;Atp2c1;Atp5g1;Atp5j;Atp5j2;Atp5k;Atp6v0b;Atp6v0c;Atp6v0d1;Atp6v1b2;Atp6v1g1;BC048355;Cad;Cmah;Ctps;Dcakd;Dlst;Dtymk;Enpp3;Gart;Glyr1;Gnai3;Gnl2;Gnl3;Guk1;Hibadh;Hprt;Hras1;Idh3a;Idh3b;Idh3g;Impdh2;Itpa;Ldhb;Macf1;Mdh1;Mras;Msh2;Msh6;Mthfd1;Myh10;Myh9;Ndufs1;Nme1;Nme4;Nt5c;Nudt1;Ola1;Pgd;Pgls;Pnp;Ppp2r4;Prdx5;Prps1;Psmc2;Rab11a;Rab2a;Rab5c;Rac1;Rap1b…
Module5_esc	nucleotide_metabolic_process	4.59079e-09	1.95717e-07	14143	463	1418	87	1.87415	Adk;Adsl;Adss;Ak2;Arl1;Asna1;Atic;Atp1b3;Atp2a2;Atp2c1;Atp5g1;Atp5j;Atp5j2;Atp5k;Atp6v0b;Atp6v0c;Atp6v0d1;Atp6v1b2;Atp6v1g1;BC048355;Cad;Cmah;Ctps;Dcakd;Dlst;Dtymk;Enpp3;Gart;Glyr1;Gnai3;Gnl2;Gnl3;Guk1;Hibadh;Hprt;Hras1;Idh3a;Idh3b;Idh3g;Impdh2;Itpa;Ldhb;Macf1;Mdh1;Mras;Msh2;Msh6;Mthfd1;Myh10;Myh9;Ndufs1;Nme1;Nme4;Nt5c;Nudt1;Ola1;Pgd;Pgls;Pnp;Ppp2r4;Prdx5;Prps1;Psmc2;Rab11a;Rab2a;Rab5c;Rac1;Rap1b…
Module5_esc	acetyl-CoA_metabolic_process	7.51535e-09	3.13991e-07	14143	39	1418	18	4.60334	Acly;Aco2;Cs;Dld;Dlst;Idh2;Idh3a;Idh3b;Idh3g;Mdh1;Pdha1;Pdhb;Sdha;Sdhb;Sdhc;Sdhd;Sucla2;Suclg1
Module5_esc	catabolic_process	1.08201e-08	4.42236e-07	14143	1096	1418	167	1.51975	Aco2;Acot7;Adss;Ahcy;Akt1;Amt;Arl1;Asna1;Atp2a2;Atp2c1;Atp5j;Atp5j2;Atp5k;Atp6v0b;Atp6v0c;Atp6v0d1;Atp6v1g1;BC048355;Bag6;Bcat1;Bcat2;Blvrb;Bnip3l;Ccrn4l;Cdc20;Cdc34;Cdkn2a;Clpp;Cpe;Crmp1;Cs;Ctsd;Cul1;Cul3;Cul4b;Ddah2;Dhcr24;Dlst;Echs1;Eci2;Ei24;Eif4a3;Enpp3;Etf1;Exosc10;Exosc3;Fis1;Gcsh;Gldc;Glud1;Glyr1;Gnai3;Gnl2;Gnl3;Got2;Gspt1;Gsto1;Hadh;Hibadh;Hmox1;Hprt;Hras1;Huwe1;Idh2;Idh3a;Idh3b;Idh3g;It…
Module5_esc	cellular_catabolic_process	1.10083e-08	4.42236e-07	14143	926	1418	146	1.57256	Aco2;Acot7;Adss;Ahcy;Amt;Arl1;Asna1;Atp2a2;Atp2c1;Atp5j;Atp5j2;Atp5k;Atp6v0b;Atp6v0c;Atp6v0d1;Atp6v1g1;BC048355;Bag6;Bcat1;Bcat2;Blvrb;Bnip3l;Ccrn4l;Cdc20;Cdc34;Cdkn2a;Clpp;Cpe;Crmp1;Cs;Ctsd;Cul1;Cul3;Cul4b;Ddah2;Dlst;Echs1;Eci2;Ei24;Eif4a3;Enpp3;Etf1;Exosc10;Exosc3;Fis1;Gcsh;Gldc;Glud1;Gnai3;Gnl2;Gnl3;Got2;Gspt1;Gsto1;Hadh;Hmox1;Hprt;Hras1;Huwe1;Idh2;Idh3a;Idh3b;Idh3g;Itpa;Lin28a;Lsm2;Lsm5;Macf1…
Module5_esc	cellular_protein_metabolic_process	1.19825e-08	4.72292e-07	14143	2060	1418	280	1.35568	Aars;Abcf1;Actl6a;Adprh;Akt1;Anapc13;Anapc5;Anxa1;App;Ash2l;Avpi1;B2m;Bag1;Bag6;Bgn;Birc5;Bloc1s1;Bnip3l;Cad;Calca;Canx;Carm1;Cars;Ccnb1;Ccnd1;Ccnd3;Ccne1;Cd81;Cdc16;Cdc20;Cdc34;Cdk9;Cdkn2a;Clk1;Clpp;Cops2;Cops3;Cops4;Cops5;Cops6;Cops7a;Cops8;Csnk1a1;Csnk1g2;Csnk2a1;Cul1;Cul3;Cul4b;Dars;Dbf4;Ddost;Denr;Dnaja2;Dnajb11;Dnajb6;Dnajc7;Dnajc8;Dohh;Dpm3;Dpy30;Dusp14;Dusp9;Eed;Eef1e1;Eftud2;Eif1a;Eif1ax…
Module5_esc	cellular_macromolecule_biosynthetic_process	1.42297e-08	5.50478e-07	14143	2046	1418	278	1.3552	2700060E02Rik;Aars;Abcf1;Actl6a;Adrm1;Aebp2;Aes;Ahctf1;Akt1;Apex1;Arid5b;Ash2l;Bclaf1;Birc5;Carm1;Cars;Cbx7;Ccne1;Cdc5l;Cdca7;Cdk9;Cdkn2a;Cdt1;Chaf1b;Chd4;Chmp1a;Churc1;Csnk2a1;Ctbp1;Ctcf;Ctnnd1;Dars;Dbf4;Ddost;Ddx1;Ddx17;Ddx54;Denr;Dnajc2;Dnmt1;Dnmt3a;Dnttip2;Dpm3;Dppa2;Dppa4;Dpy30;Drap1;E2f4;Eed;Eef1e1;Eftud2;Egr1;Eif1a;Eif1ax;Eif2a;Eif2b5;Eif2d;Eif2s1;Eif2s3x;Eif3a;Eif3b;Eif3f;Eif3g;Eif4a3;Eif…
Module5_esc	macromolecule_biosynthetic_process	1.67733e-08	6.37079e-07	14143	2067	1418	280	1.35109	2700060E02Rik;Aars;Abcf1;Actl6a;Adrm1;Aebp2;Aes;Ahctf1;Akt1;Apex1;Arid5b;Ash2l;Bclaf1;Birc5;Carm1;Cars;Cbx7;Ccnd3;Ccne1;Cdc5l;Cdca7;Cdk9;Cdkn2a;Cdt1;Chaf1b;Chd4;Chmp1a;Churc1;Col1a1;Csnk2a1;Ctbp1;Ctcf;Ctnnd1;Dars;Dbf4;Ddost;Ddx1;Ddx17;Ddx54;Denr;Dnajc2;Dnmt1;Dnmt3a;Dnttip2;Dpm3;Dppa2;Dppa4;Dpy30;Drap1;E2f4;Eed;Eef1e1;Eftud2;Egr1;Eif1a;Eif1ax;Eif2a;Eif2b5;Eif2d;Eif2s1;Eif2s3x;Eif3a;Eif3b;Eif3f;Eif…
Module5_esc	ncRNA_metabolic_process	1.9986e-08	7.45551e-07	14143	239	1418	53	2.21179	Aars;Bop1;Cars;Cdkn2a;D10Wsu52e;Dars;Dcaf13;Dkc1;Eif4a3;Emg1;Eprs;Exosc10;Exosc3;Exosc8;Farsa;Farsb;Fcf1;Ftsj3;Gar1;Hars;Iars;Imp3;Lars;Lin28a;Mars;Nars;Nhp2;Nob1;Nolc1;Nop10;Nop14;Npm3;Nsa2;Nsun2;Pa2g4;Pes1;Rars;Rpf1;Rpp25;Rrp1;Rrp9;Sbds;Srrt;Ssb;Tarbp2;Tars;Trmt1;Tsen34;Utp11l;Vars;Wars;Wdr12;Yars
Module5_esc	RNA_splicing,_via_transesterification_reactions	2.09808e-08	7.68929e-07	14143	59	1418	22	3.71908	Celf1;Cwc15;Ddx39;Lsm2;Phf5a;Prmt5;Prpf19;Prpf31;Prpf8;Psip1;Rbm17;Rbmxl1;Sf3b1;Snrpa;Snrpb2;Snrpc;Snw1;Srrm1;Srsf1;Srsf10;Tra2a;Tra2b
Module5_esc	cofactor_catabolic_process	2.13733e-08	7.69807e-07	14143	33	1418	16	4.83583	Aco2;Blvrb;Cs;Dlst;Hmox1;Idh2;Idh3a;Idh3b;Idh3g;Mdh1;Sdha;Sdhb;Sdhc;Sdhd;Sucla2;Suclg1
Module5_esc	DNA_metabolic_process	2.40925e-08	8.53038e-07	14143	546	1418	96	1.75365	Acin1;Actl6a;Apex1;Bccip;Ccne1;Cdk9;Cdkn2a;Cdt1;Cenpa;Cenpv;Chaf1b;Chmp1a;Ctcf;Cul4b;Dbf4;Ddx1;Dnajc2;Dnmt1;Dnmt3a;Dnmt3b;Eef1e1;Exosc3;H2afx;H2afy;Hells;Hjurp;Huwe1;Kif22;Lig1;Mcm10;Mcm2;Mcm3;Mcm4;Mcm5;Mcm6;Mcm7;Mcrs1;Meg3;Morf4l2;Msh2;Msh6;Mta2;Nae1;Nap1l4;Nasp;Ncapd2;Ncaph2;Nsmce1;Nudt1;Orc2;Parp1;Phb;Pold2;Prpf19;Pttg1;Rad21;Rad23b;Rbx1;Rfc2;Rfc4;Rfc5;Rpa1;Rpa3;Rrm1;Ruvbl1;Sfr1;Slbp;Smarca4;S…
Module5_esc	ribonucleotide_metabolic_process	2.55554e-08	8.89752e-07	14143	308	1418	63	2.04012	Adk;Adsl;Adss;Ak2;Arl1;Asna1;Atic;Atp1b3;Atp2a2;Atp2c1;Atp5g1;Atp5j;Atp5j2;Atp5k;Atp6v0b;Atp6v0c;Atp6v0d1;Atp6v1b2;Atp6v1g1;Cad;Ctps;Gart;Gnai3;Gnl2;Gnl3;Guk1;Hprt;Hras1;Impdh2;Itpa;Macf1;Mras;Msh2;Msh6;Myh10;Myh9;Ndufs1;Nme1;Nme4;Ola1;Pnp;Ppp2r4;Prps1;Psmc2;Rab11a;Rab2a;Rab5c;Rac1;Rap1b;Rheb;Rhoa;Rras;Sept2;Smarca4;Smarca5;Srpr;Top2a;Tuba4a;Tubb2a;Tubb2b;Tubb3;Tubb6;Vps4b
Module5_esc	macromolecular_complex_subunit_organization	2.94344e-08	9.94186e-07	14143	655	1418	110	1.67501	Adrm1;Adsl;Ahctf1;Anxa5;Apoa1bp;Apoc1;Arpc4;Ccnb1;Ccrn4l;Cdh1;Celf1;Cenpa;Cenpv;Clpp;Col1a1;Col1a2;Ctcf;Ctnna1;Ehd1;Eif2a;Eif3a;Eif6;Enah;Etf1;Fbxo5;Glul;Gmnn;Gsn;Gtf2a2;H2-Ke2;H2afx;H2afy;Hells;Hjurp;Hmox1;Hprt;Hras1;Hsd17b10;Hspa4;Ict1;Ilk;Impdh2;Jup;Lamc1;Lsm14a;Lsm2;Mapk3;Max;Mcm2;Mdm2;Mff;Mgp;Nacc1;Nap1l4;Napa;Nasp;Ndufs5;Ndufs7;Ndufs8;Nudt21;Nupr1;Ogt;Pfkl;Pfkp;Picalm;Pih1d1;Ppp5c;Prkcsh;Pr…
Module5_esc	cofactor_metabolic_process	2.95067e-08	9.94186e-07	14143	190	1418	45	2.36224	Acly;Aco2;Atic;Blvrb;Cs;Dcakd;Dld;Dlst;Dnmt1;Folr1;Gart;Glyr1;Hibadh;Hmox1;Idh2;Idh3a;Idh3b;Idh3g;Ldhb;Mat2a;Mdh1;Mmadhc;Mthfd1;Mthfd1l;Mthfd2;Pcmt1;Pdha1;Pdhb;Pgd;Pgls;Pnp;Prdx5;Qdpr;Scp2;Sdha;Sdhb;Sdhc;Sdhd;Slc25a39;Sucla2;Suclg1;Tkt;Tmem14c;Txnrd1;Urod
Module5_esc	purine_ribonucleotide_metabolic_process	3.19268e-08	1.05865e-06	14143	296	1418	61	2.05543	Adk;Adsl;Adss;Ak2;Arl1;Asna1;Atic;Atp1b3;Atp2a2;Atp2c1;Atp5g1;Atp5j;Atp5j2;Atp5k;Atp6v0b;Atp6v0c;Atp6v0d1;Atp6v1b2;Atp6v1g1;Gart;Gnai3;Gnl2;Gnl3;Guk1;Hprt;Hras1;Impdh2;Itpa;Macf1;Mras;Msh2;Msh6;Myh10;Myh9;Ndufs1;Nme1;Nme4;Ola1;Pnp;Ppp2r4;Prps1;Psmc2;Rab11a;Rab2a;Rab5c;Rac1;Rap1b;Rheb;Rhoa;Rras;Sept2;Smarca4;Smarca5;Srpr;Top2a;Tuba4a;Tubb2a;Tubb2b;Tubb3;Tubb6;Vps4b
Module5_esc	nucleoside_triphosphate_metabolic_process	3.56202e-08	1.15158e-06	14143	290	1418	60	2.06357	Adk;Adss;Ak2;Arl1;Asna1;Atp1b3;Atp2a2;Atp2c1;Atp5g1;Atp5j;Atp5j2;Atp5k;Atp6v0b;Atp6v0c;Atp6v0d1;Atp6v1b2;Atp6v1g1;Cad;Ctps;Dtymk;Enpp3;Gnai3;Gnl2;Gnl3;Guk1;Hras1;Itpa;Macf1;Mras;Msh2;Msh6;Myh10;Myh9;Ndufs1;Nme1;Nme4;Nudt1;Ola1;Pnp;Ppp2r4;Psmc2;Rab11a;Rab2a;Rab5c;Rac1;Rap1b;Rheb;Rhoa;Rras;Sept2;Smarca4;Smarca5;Srpr;Top2a;Tuba4a;Tubb2a;Tubb2b;Tubb3;Tubb6;Vps4b
Module5_esc	ribosome_biogenesis	3.58319e-08	1.15158e-06	14143	148	1418	38	2.56087	Aatf;Bop1;Cdkn2a;Dcaf13;Dkc1;Eif2a;Eif4a3;Eif6;Emg1;Exosc10;Exosc3;Exosc8;Fcf1;Ftsj3;Gar1;Gnl2;Gnl3;Imp3;Ipo4;Mrto4;Nhp2;Nmd3;Nob1;Nop10;Nop14;Nop58;Npm3;Nsa2;Pa2g4;Pes1;Rpf1;Rrp1;Rrp9;Rrs1;Sbds;Tsr1;Utp11l;Wdr12
Module5_esc	cellular_component_assembly	5.14693e-08	1.62339e-06	14143	940	1418	145	1.53853	Actn1;Add1;Adrm1;Adsl;Agfg1;Ahctf1;Anxa5;Apoa1bp;App;Arpc4;Bag6;Cald1;Capg;Ccnb1;Ccrn4l;Cd9;Cdh1;Cdkn2a;Celf1;Cenpa;Cenpv;Chaf1b;Clpp;Cltc;Col1a1;Col1a2;Coro1c;Ctcf;Ctnna1;Ctsd;Cul3;Cyfip1;Dbnl;E2f4;Ehd1;Eif2a;Eif3a;Eif6;Ezr;Fbxo5;Glul;Gmnn;Gsn;Gtf2a2;H2-Ke2;H2afx;H2afy;Haus1;Hdac3;Hells;Hjurp;Hmox1;Hormad1;Hprt;Hras1;Hsd17b10;Hspa4;Ilk;Impdh2;Iscu;Itga6;Jup;Krt19;Lamc1;Lox;Lsm14a;Lsm2;Mapk3;Max;…
Module5_esc	coenzyme_metabolic_process	5.20665e-08	1.62339e-06	14143	156	1418	39	2.49348	Acly;Aco2;Atic;Cs;Dcakd;Dld;Dlst;Dnmt1;Folr1;Gart;Glyr1;Hibadh;Idh2;Idh3a;Idh3b;Idh3g;Ldhb;Mat2a;Mdh1;Mthfd1;Mthfd1l;Mthfd2;Pcmt1;Pdha1;Pdhb;Pgd;Pgls;Pnp;Prdx5;Qdpr;Scp2;Sdha;Sdhb;Sdhc;Sdhd;Sucla2;Suclg1;Tkt;Txnrd1
Module5_esc	RNA_splicing,_via_transesterification_reactions_with_bulged_adenosine_as_nucleophile	7.96357e-08	2.411e-06	14143	58	1418	21	3.61124	Celf1;Cwc15;Ddx39;Lsm2;Phf5a;Prmt5;Prpf19;Prpf31;Prpf8;Psip1;Rbmxl1;Sf3b1;Snrpa;Snrpb2;Snrpc;Snw1;Srrm1;Srsf1;Srsf10;Tra2a;Tra2b
Module5_esc	nuclear_mRNA_splicing,_via_spliceosome	7.96357e-08	2.411e-06	14143	58	1418	21	3.61124	Celf1;Cwc15;Ddx39;Lsm2;Phf5a;Prmt5;Prpf19;Prpf31;Prpf8;Psip1;Rbmxl1;Sf3b1;Snrpa;Snrpb2;Snrpc;Snw1;Srrm1;Srsf1;Srsf10;Tra2a;Tra2b
Module5_esc	cullin_deneddylation	8.22745e-08	2.42073e-06	14143	9	1418	8	8.8657	Cops2;Cops3;Cops4;Cops5;Cops6;Cops7a;Cops8;Gps1
Module5_esc	protein_deneddylation	8.22745e-08	2.42073e-06	14143	9	1418	8	8.8657	Cops2;Cops3;Cops4;Cops5;Cops6;Cops7a;Cops8;Gps1
Module5_esc	protein_metabolic_process	8.38615e-08	2.43315e-06	14143	2414	1418	315	1.30148	Aars;Abcf1;Actl6a;Adam23;Adprh;Akt1;Anapc13;Anapc5;Anxa1;App;Ash2l;Avpi1;B2m;Bag1;Bag6;Bgn;Birc5;Bloc1s1;Bnip3l;Cad;Calca;Canx;Carm1;Cars;Ccnb1;Ccnd1;Ccnd3;Ccne1;Cd81;Cdc16;Cdc20;Cdc34;Cdh1;Cdk9;Cdkn2a;Clk1;Clpp;Cops2;Cops3;Cops4;Cops5;Cops6;Cops7a;Cops8;Cpe;Csnk1a1;Csnk1g2;Csnk2a1;Ctsa;Ctsd;Ctsl;Ctsz;Cul1;Cul3;Cul4b;Dars;Dbf4;Ddost;Denr;Dhcr24;Dld;Dnaja2;Dnajb11;Dnajb6;Dnajc7;Dnajc8;Dohh;Dpm3;Dp…
Module5_esc	energy_derivation_by_oxidation_of_organic_compounds	1.10482e-07	3.16161e-06	14143	101	1418	29	2.8638	Aco2;Adsl;Akt1;Bloc1s1;Cs;Dld;Dlst;Idh2;Idh3a;Idh3b;Idh3g;Mdh1;Mtfr1;Mybbp1a;Ndufa5;Ndufb8;Ndufc2;Ndufs1;Ndufv2;Ppp1cc;Ptges3;Sdha;Sdhb;Sdhc;Sdhd;Sucla2;Suclg1;Tbrg4;Uqcrc1
Module5_esc	macromolecular_complex_assembly	1.37715e-07	3.88766e-06	14143	604	1418	101	1.66782	Adrm1;Adsl;Ahctf1;Anxa5;Apoa1bp;Arpc4;Ccnb1;Ccrn4l;Cdh1;Celf1;Cenpa;Cenpv;Clpp;Col1a1;Col1a2;Ctnna1;Ehd1;Eif2a;Eif3a;Eif6;Fbxo5;Glul;Gmnn;Gsn;Gtf2a2;H2-Ke2;H2afx;H2afy;Hells;Hjurp;Hmox1;Hprt;Hras1;Hsd17b10;Hspa4;Ilk;Impdh2;Jup;Lamc1;Lsm14a;Lsm2;Mapk3;Max;Mcm2;Mdm2;Mff;Mgp;Nacc1;Nap1l4;Ndufs5;Ndufs7;Ndufs8;Nudt21;Nupr1;Ogt;Pfkl;Pfkp;Picalm;Pih1d1;Ppp5c;Prkcsh;Prmt5;Prpf19;Prpf31;Psip1;Psmg1;Pum2;R…
Module5_esc	coenzyme_catabolic_process	1.77101e-07	4.93284e-06	14143	29	1418	14	4.81499	Aco2;Cs;Dlst;Idh2;Idh3a;Idh3b;Idh3g;Mdh1;Sdha;Sdhb;Sdhc;Sdhd;Sucla2;Suclg1
Module5_esc	cellular_macromolecular_complex_subunit_organization	1.81693e-07	4.99417e-06	14143	310	1418	61	1.96261	Adrm1;Ahctf1;Arpc4;Ccrn4l;Celf1;Cenpa;Cenpv;Ctcf;Eif2a;Eif3a;Eif6;Enah;Etf1;Fbxo5;Gsn;Gtf2a2;H2-Ke2;H2afx;H2afy;Hells;Hjurp;Hspa4;Ict1;Lsm14a;Lsm2;Mcm2;Nap1l4;Napa;Nasp;Ndufs5;Ndufs7;Ndufs8;Picalm;Pih1d1;Prmt5;Prpf19;Prpf31;Psip1;Psmg1;Pum2;Rbmxl1;Sbds;Sept2;Smarca4;Smarca5;Smarce1;Smc4;Snrpc;Srsf1;Srsf10;Taf10;Tarbp2;Tbca;Tfam;Tuba4a;Tubb2a;Tubb2b;Tubb3;Tubb6;Ube2c;Vasp
Module5_esc	ribonucleoside_triphosphate_metabolic_process	2.01405e-07	5.46409e-06	14143	276	1418	56	2.02369	Adss;Ak2;Arl1;Asna1;Atp1b3;Atp2a2;Atp2c1;Atp5g1;Atp5j;Atp5j2;Atp5k;Atp6v0b;Atp6v0c;Atp6v0d1;Atp6v1b2;Atp6v1g1;Cad;Ctps;Gnai3;Gnl2;Gnl3;Guk1;Hras1;Itpa;Macf1;Mras;Msh2;Msh6;Myh10;Myh9;Ndufs1;Nme1;Nme4;Ola1;Pnp;Ppp2r4;Psmc2;Rab11a;Rab2a;Rab5c;Rac1;Rap1b;Rheb;Rhoa;Rras;Sept2;Smarca4;Smarca5;Srpr;Top2a;Tuba4a;Tubb2a;Tubb2b;Tubb3;Tubb6;Vps4b
Module5_esc	purine_nucleoside_triphosphate_metabolic_process	3.31155e-07	8.77092e-06	14143	280	1418	56	1.99478	Adk;Adss;Ak2;Arl1;Asna1;Atp1b3;Atp2a2;Atp2c1;Atp5g1;Atp5j;Atp5j2;Atp5k;Atp6v0b;Atp6v0c;Atp6v0d1;Atp6v1b2;Atp6v1g1;Gnai3;Gnl2;Gnl3;Guk1;Hras1;Itpa;Macf1;Mras;Msh2;Msh6;Myh10;Myh9;Ndufs1;Nme1;Nme4;Nudt1;Ola1;Pnp;Ppp2r4;Psmc2;Rab11a;Rab2a;Rab5c;Rac1;Rap1b;Rheb;Rhoa;Rras;Sept2;Smarca4;Smarca5;Srpr;Top2a;Tuba4a;Tubb2a;Tubb2b;Tubb3;Tubb6;Vps4b
Module5_esc	purine-containing_compound_metabolic_process	3.31691e-07	8.77092e-06	14143	380	1418	70	1.8373	1190003J15Rik;Adk;Adsl;Adss;Ak2;Arl1;Asna1;Atic;Atp1b3;Atp2a2;Atp2c1;Atp5g1;Atp5j;Atp5j2;Atp5k;Atp6v0b;Atp6v0c;Atp6v0d1;Atp6v1b2;Atp6v1g1;Dcakd;Dnmt1;Dnmt3a;Dnmt3b;Gart;Gnai3;Gnl2;Gnl3;Guk1;Hprt;Hras1;Impdh2;Itpa;Macf1;Mat2a;Mras;Msh2;Msh6;Mthfd1;Myh10;Myh9;Ndufs1;Nme1;Nme4;Nudt1;Ola1;Pcmt1;Pnp;Ppp2r4;Prps1;Psmc2;Rab11a;Rab2a;Rab5c;Rac1;Rap1b;Rheb;Rhoa;Rras;Sept2;Smarca4;Smarca5;Srpr;Top2a;Tuba4a…
Module5_esc	cellular_component_assembly_at_cellular_level	3.67982e-07	9.60894e-06	14143	624	1418	102	1.63035	Actn1;Add1;Adrm1;Agfg1;Ahctf1;App;Arpc4;Bag6;Cald1;Capg;Ccrn4l;Cd9;Cdh1;Cdkn2a;Celf1;Cenpa;Cenpv;Chaf1b;Cltc;Coro1c;Ctcf;Ctnna1;Ctsd;Cul3;Cyfip1;Dbnl;E2f4;Eif2a;Eif3a;Eif6;Ezr;Fbxo5;Gsn;Gtf2a2;H2-Ke2;H2afx;H2afy;Haus1;Hdac3;Hells;Hjurp;Hormad1;Hspa4;Ilk;Iscu;Itga6;Jup;Krt19;Lamc1;Lox;Lsm14a;Lsm2;Mcm2;Mybl2;Myh10;Nap1l4;Nckap1;Ndufs5;Ndufs7;Ndufs8;Nfu1;Nup85;Pafah1b1;Picalm;Pih1d1;Prdx6;Prmt5;Prpf…
Module5_esc	chromosome_organization	5.78618e-07	1.48348e-05	14143	521	1418	88	1.68465	0610010K14Rik;Acin1;Actl6a;Aebp2;Ash2l;Bag6;Bub3;Carm1;Cbx7;Ccnb1;Cdca8;Cdkn2a;Cenpa;Cenpv;Chaf1b;Chd3;Chd4;Chmp1a;Ctbp1;Ctcf;Dnajc2;Dnmt1;Dnmt3a;Dnmt3b;Dpy30;Eed;Ezh2;H2afx;H2afy;Hat1;Hdac1;Hdac2;Hdac3;Hells;Hjurp;Hormad1;Huwe1;Itpa;Jarid2;Kat2a;Kdm5b;Mad2l1;Mbd3;Mcm2;Mcrs1;Morf4l2;Msh2;Msh6;Mta2;Nap1l4;Nasp;Ncapd2;Ncaph2;Ogt;Parp1;Phb;Pim3;Prmt5;Psrc1;Pttg1;Rad23b;Rnf2;Rpa1;Rrs1;Ruvbl1;Setd8;Sk…
Module5_esc	tRNA_aminoacylation_for_protein_translation	5.82314e-07	1.48348e-05	14143	40	1418	16	3.98956	Aars;Cars;Dars;Eprs;Farsa;Farsb;Hars;Iars;Lars;Mars;Nars;Rars;Tars;Vars;Wars;Yars
Module5_esc	purine_ribonucleoside_triphosphate_metabolic_process	7.7024e-07	1.93859e-05	14143	273	1418	54	1.97286	Adss;Ak2;Arl1;Asna1;Atp1b3;Atp2a2;Atp2c1;Atp5g1;Atp5j;Atp5j2;Atp5k;Atp6v0b;Atp6v0c;Atp6v0d1;Atp6v1b2;Atp6v1g1;Gnai3;Gnl2;Gnl3;Guk1;Hras1;Itpa;Macf1;Mras;Msh2;Msh6;Myh10;Myh9;Ndufs1;Nme1;Nme4;Ola1;Pnp;Ppp2r4;Psmc2;Rab11a;Rab2a;Rab5c;Rac1;Rap1b;Rheb;Rhoa;Rras;Sept2;Smarca4;Smarca5;Srpr;Top2a;Tuba4a;Tubb2a;Tubb2b;Tubb3;Tubb6;Vps4b
Module5_esc	translational_initiation	1.04951e-06	2.61003e-05	14143	56	1418	19	3.384	Abcf1;Denr;Eif1a;Eif1ax;Eif2a;Eif2b5;Eif2d;Eif2s1;Eif2s3x;Eif3a;Eif3b;Eif3f;Eif3g;Eif4a3;Eif4e;Eif4e2;Eif4h;Eif5;Eif6
Module5_esc	regulation_of_cell_cycle	1.13934e-06	2.80009e-05	14143	506	1418	85	1.67546	Aatf;Akt1;Apex1;App;Bak1;Bcat1;Bccip;Bex2;Birc5;Bop1;Bub3;Ccna2;Ccnb1;Ccnb2;Ccnd1;Ccnd3;Ccne1;Ccng1;Cdc20;Cdk9;Cdkn2a;Cdt1;Chmp1a;Cops5;Csnk2a1;Ctbp1;Cul4b;Dbf4;E2f4;Eif4e;Ezh2;Fbxo5;Fhl1;Fnta;Gadd45a;Gmnn;H2afx;Hdac3;Hormad1;Hras1;Id3;Ilk;Inhba;Lmnb1;Macf1;Mad2l1;Mdm2;Msh2;Mybbp1a;Nae1;Nanog;Nupr1;Pafah1b1;Pcbp4;Pes1;Pim3;Plk1;Plk2;Ppm1g;Ppp2r5c;Psrc1;Rcc1;Rhoa;Sbds;Sfn;Sin3b;Slbp;Son;Sox2;Tacc3…
Module5_esc	organic_acid_metabolic_process	1.40565e-06	3.41442e-05	14143	524	1418	87	1.65597	Aars;Acly;Aco2;Acot7;Adipor1;Adss;Ahcy;Aldh18a1;Amt;Ass1;Bcat1;Bcat2;Cars;Cmah;Cs;Ctps;Cyb5;Dars;Ddah2;Degs1;Dld;Dlst;Dnmt1;Dnmt3a;Dnmt3b;Dohh;Ech1;Echs1;Eci2;Eprs;Fads2;Farsa;Farsb;Fasn;Folr1;Gart;Gcsh;Gldc;Glo1;Glud1;Glul;Got2;Gsr;Gsto1;Gstp2;Hadh;Hars;Hibadh;Iars;Idh2;Idh3a;Idh3b;Idh3g;Lars;Ldhb;Lypla1;Mars;Mat2a;Mdh1;Mthfd1;Mthfd1l;Nars;Ndufab1;Pck2;Pcmt1;Pdha1;Pdhb;Pgd;Pnp;Prps1;Ptges3;Pycr2…
Module5_esc	rRNA_processing	1.42484e-06	3.42125e-05	14143	101	1418	27	2.66629	Bop1;Cdkn2a;Dcaf13;Dkc1;Eif4a3;Emg1;Exosc10;Exosc3;Exosc8;Fcf1;Ftsj3;Gar1;Imp3;Nhp2;Nob1;Nop10;Nop14;Npm3;Nsa2;Pa2g4;Pes1;Rpf1;Rrp1;Rrp9;Sbds;Utp11l;Wdr12
Module5_esc	purine_nucleotide_metabolic_process	1.57191e-06	3.7315e-05	14143	344	1418	63	1.82662	Adk;Adsl;Adss;Ak2;Arl1;Asna1;Atic;Atp1b3;Atp2a2;Atp2c1;Atp5g1;Atp5j;Atp5j2;Atp5k;Atp6v0b;Atp6v0c;Atp6v0d1;Atp6v1b2;Atp6v1g1;Gart;Gnai3;Gnl2;Gnl3;Guk1;Hprt;Hras1;Impdh2;Itpa;Macf1;Mras;Msh2;Msh6;Mthfd1;Myh10;Myh9;Ndufs1;Nme1;Nme4;Nudt1;Ola1;Pnp;Ppp2r4;Prps1;Psmc2;Rab11a;Rab2a;Rab5c;Rac1;Rap1b;Rheb;Rhoa;Rras;Sept2;Smarca4;Smarca5;Srpr;Top2a;Tuba4a;Tubb2a;Tubb2b;Tubb3;Tubb6;Vps4b
Module5_esc	intracellular_transport	1.61056e-06	3.7803e-05	14143	604	1418	97	1.60177	Aaas;Actr2;Akap12;Akt1;Alyref;Ap1m2;Ap1s1;Ap2a1;Ap3s1;App;Arcn1;Arl1;Arl6ip1;Aspscr1;Atp2c1;Bak1;Bcap31;Cd24a;Cltb;Cltc;Copa;Copb1;Copb2;Copg;Copz1;Cse1l;Cul3;Ddx39;Dpy30;Ehd1;Enah;Folr1;Gabarapl2;Gipc1;Hspa4;Ipo4;Ipo7;Klc1;Kpnb1;Lmna;M6pr;Macf1;Mapk1;Mapk3;Mff;Mrpl18;Mtx2;Mybbp1a;Napa;Nmd3;Nop58;Nxf1;Pabpn1;Pafah1b1;Pdcd6;Picalm;Rab1;Rab2a;Rangrf;Rer1;Samm50;Sec13;Snx2;Snx6;Spnb2;Srp14;Srp72;Srp…
Module5_esc	intracellular_protein_transport	1.68054e-06	3.90072e-05	14143	352	1418	64	1.81344	Akap12;Akt1;Ap1m2;Ap1s1;Ap2a1;Ap3s1;Arcn1;Arl6ip1;Aspscr1;Bcap31;Cd24a;Cltb;Cltc;Copa;Copb1;Copb2;Copg;Copz1;Cse1l;Ehd1;Folr1;Gipc1;Hspa4;Ipo4;Ipo7;Klc1;Kpnb1;Lmna;M6pr;Macf1;Mapk1;Mapk3;Mff;Mtx2;Napa;Nop58;Pdcd6;Rab1;Rab2a;Samm50;Snx2;Snx6;Spnb2;Srp14;Srp72;Srp9;Srpr;Ssr3;Syngr2;Timm13;Timm17a;Timm8b;Tmed2;Tnpo1;Tomm20;Tomm22;Tomm40;Tomm5;Tomm7;Trp53;Xpo1;Ywhab;Ywhag;Ywhah
Module5_esc	cellular_macromolecular_complex_assembly	1.7759e-06	4.07676e-05	14143	266	1418	52	1.94979	Adrm1;Ahctf1;Arpc4;Ccrn4l;Celf1;Cenpa;Cenpv;Eif2a;Eif3a;Eif6;Fbxo5;Gsn;Gtf2a2;H2-Ke2;H2afx;H2afy;Hells;Hjurp;Hspa4;Lsm14a;Lsm2;Mcm2;Nap1l4;Ndufs5;Ndufs7;Ndufs8;Picalm;Pih1d1;Prmt5;Prpf19;Prpf31;Psip1;Psmg1;Pum2;Rbmxl1;Sbds;Sept2;Smarca4;Smarca5;Snrpc;Srsf1;Srsf10;Taf10;Tarbp2;Tbca;Tfam;Tuba4a;Tubb2a;Tubb2b;Tubb3;Tubb6;Ube2c
Module5_esc	amino_acid_activation	1.83555e-06	4.12309e-05	14143	43	1418	16	3.71122	Aars;Cars;Dars;Eprs;Farsa;Farsb;Hars;Iars;Lars;Mars;Nars;Rars;Tars;Vars;Wars;Yars
Module5_esc	tRNA_aminoacylation	1.83555e-06	4.12309e-05	14143	43	1418	16	3.71122	Aars;Cars;Dars;Eprs;Farsa;Farsb;Hars;Iars;Lars;Mars;Nars;Rars;Tars;Vars;Wars;Yars
Module5_esc	chromatin_silencing	2.04687e-06	4.54884e-05	14143	18	1418	10	5.54106	Dnmt3a;Dnmt3b;Hat1;Hdac2;Hells;Mbd3;Smarca4;Smarca5;Ube2b;Ubtf
Module5_esc	DNA_replication	2.12663e-06	4.67636e-05	14143	146	1418	34	2.32269	Ccne1;Cdk9;Cdt1;Chaf1b;Dbf4;Dnajc2;Lig1;Mcm10;Mcm2;Mcm3;Mcm4;Mcm5;Mcm6;Mcm7;Nae1;Nasp;Orc2;Phb;Pold2;Rfc2;Rfc4;Rfc5;Rpa1;Rpa3;Rrm1;Slbp;Ssbp1;Stra13;Supt16h;Tbrg1;Terf1;Tipin;Tk1;Top2a
Module5_esc	macromolecule_localization	2.33195e-06	5.05969e-05	14143	1145	1418	162	1.41116	Ahctf1;Aim2;Akap12;Akt1;Alyref;Anxa1;Ap1m2;Ap1s1;Ap2a1;Ap3s1;Apoc1;Arcn1;Arf4;Arf5;Arl1;Arl6ip1;Aspscr1;Bag6;Bcap31;Birc5;Bub3;Ccdc23;Cd24a;Cd81;Cdh1;Cenpa;Chmp1a;Chmp2a;Chmp4b;Cltb;Cltc;Col1a1;Copa;Copb1;Copb2;Copg;Copz1;Cpe;Cse1l;Ddx39;Dhcr24;Dnmt3b;Ehd1;Eif4a3;Erp29;Exosc10;Fabp3;Fnta;Folr1;G3bp2;Gabarap;Gabarapl2;Get4;Gipc1;Gltp;Got2;Guk1;Hdlbp;Hspa4;Hspg2;Igf2bp1;Inhba;Ipo4;Ipo7;Jup;Kdelr1;K…
Module5_esc	protein_modification_by_small_protein_conjugation_or_removal	2.3494e-06	5.05969e-05	14143	348	1418	63	1.80562	Akt1;Anapc13;Anapc5;Cdc16;Cdc34;Cdkn2a;Cops2;Cops3;Cops4;Cops5;Cops6;Cops7a;Cops8;Cul1;Cul3;Fbxo15;Gps1;Huwe1;Kat2a;Klhl13;March5;Mdm2;Nae1;Nedd8;Nsmce1;Otub1;Plk1;Prpf19;Rbck1;Rbx1;Rnf187;Rnf2;Rnf220;Rnf7;Sae1;Skp1a;Stub1;Sumo1;Sumo3;Taf10;Tnks2;Traf7;Trip12;Uba3;Ube2a;Ube2b;Ube2c;Ube2e1;Ube2j2;Ube2k;Ube2l3;Ube2m;Ube2n;Ube2v1;Ubr5;Uchl1;Uchl3;Ufc1;Uhrf1;Usp1;Usp10;Usp5;Usp7
Module5_esc	rRNA_metabolic_process	2.63589e-06	5.61875e-05	14143	104	1418	27	2.58938	Bop1;Cdkn2a;Dcaf13;Dkc1;Eif4a3;Emg1;Exosc10;Exosc3;Exosc8;Fcf1;Ftsj3;Gar1;Imp3;Nhp2;Nob1;Nop10;Nop14;Npm3;Nsa2;Pa2g4;Pes1;Rpf1;Rrp1;Rrp9;Sbds;Utp11l;Wdr12
Module5_esc	carboxylic_acid_metabolic_process	2.78627e-06	5.82051e-05	14143	517	1418	85	1.63981	Aars;Acly;Aco2;Acot7;Adipor1;Adss;Ahcy;Aldh18a1;Amt;Ass1;Bcat1;Bcat2;Cars;Cmah;Cs;Ctps;Cyb5;Dars;Ddah2;Degs1;Dld;Dlst;Dnmt1;Dnmt3a;Dnmt3b;Dohh;Ech1;Echs1;Eci2;Eprs;Fads2;Farsa;Farsb;Fasn;Folr1;Gart;Gcsh;Gldc;Glo1;Glud1;Glul;Got2;Gsr;Gsto1;Gstp2;Hadh;Hars;Hibadh;Iars;Idh2;Idh3a;Idh3b;Idh3g;Lars;Ldhb;Lypla1;Mars;Mat2a;Mdh1;Mthfd1;Mthfd1l;Nars;Ndufab1;Pck2;Pcmt1;Pdha1;Pdhb;Pgd;Ptges3;Pycr2;Rars;Scd2…
Module5_esc	oxoacid_metabolic_process	2.78627e-06	5.82051e-05	14143	517	1418	85	1.63981	Aars;Acly;Aco2;Acot7;Adipor1;Adss;Ahcy;Aldh18a1;Amt;Ass1;Bcat1;Bcat2;Cars;Cmah;Cs;Ctps;Cyb5;Dars;Ddah2;Degs1;Dld;Dlst;Dnmt1;Dnmt3a;Dnmt3b;Dohh;Ech1;Echs1;Eci2;Eprs;Fads2;Farsa;Farsb;Fasn;Folr1;Gart;Gcsh;Gldc;Glo1;Glud1;Glul;Got2;Gsr;Gsto1;Gstp2;Hadh;Hars;Hibadh;Iars;Idh2;Idh3a;Idh3b;Idh3g;Lars;Ldhb;Lypla1;Mars;Mat2a;Mdh1;Mthfd1;Mthfd1l;Nars;Ndufab1;Pck2;Pcmt1;Pdha1;Pdhb;Pgd;Ptges3;Pycr2;Rars;Scd2…
Module5_esc	establishment_of_localization	3.97197e-06	8.21528e-05	14143	2150	1418	275	1.27573	1190003J15Rik;Aaas;Actr2;Agfg1;Ahctf1;Aim2;Akap12;Akt1;Alyref;Anxa1;Anxa6;Ap1m2;Ap1s1;Ap2a1;Ap3s1;Aplp1;Apoc1;App;Arcn1;Arf4;Arf5;Arl1;Arl6ip1;Asna1;Aspscr1;Atox1;Atp1b3;Atp2a2;Atp2c1;Atp5g1;Atp5j;Atp5j2;Atp5k;Atp6v0b;Atp6v0c;Atp6v0d1;Atp6v0e;Atp6v1b2;Atp6v1e1;Atp6v1f;Atp6v1g1;Bag6;Bak1;Bcap31;Birc5;Calca;Canx;Ccdc23;Ccnb1;Ccnd1;Cd24a;Cenpa;Chmp1a;Chmp2a;Chmp4b;Clic4;Clns1a;Cltb;Cltc;Cmah;Col1a1;…
Module5_esc	cellular_macromolecule_localization	4.6324e-06	9.48733e-05	14143	555	1418	89	1.59942	Akap12;Akt1;Ap1m2;Ap1s1;Ap2a1;Ap3s1;Arcn1;Arl1;Arl6ip1;Aspscr1;Bag6;Bcap31;Bub3;Cd24a;Cdh1;Cenpa;Cltb;Cltc;Col1a1;Copa;Copb1;Copb2;Copg;Copz1;Cpe;Cse1l;Ehd1;Exosc10;Fnta;Folr1;Get4;Gipc1;Hspa4;Ipo4;Ipo7;Jup;Kdelr1;Klc1;Kpnb1;Lamtor2;Lmna;M6pr;Macf1;Mapk1;Mapk3;March5;Mdm2;Mff;Mtx2;Napa;Nop58;Pdcd6;Pes1;Plk1;Rab1;Rab11a;Rab2a;Rad21;Rraga;Samm50;Slc9a3r1;Snx2;Snx6;Spnb2;Srp14;Srp72;Srp9;Srpr;Ssr3;S…
Module5_esc	cotranslational_protein_targeting_to_membrane	6.44018e-06	0.000129361	14143	7	1418	6	8.54906	Arl6ip1;Srp14;Srp72;Srp9;Srpr;Ssr3
Module5_esc	protein_neddylation	6.44018e-06	0.000129361	14143	7	1418	6	8.54906	Nae1;Nedd8;Rbx1;Rnf7;Uba3;Ube2m
Module5_esc	regulation_of_mitotic_cell_cycle	6.57033e-06	0.000130718	14143	207	1418	42	2.02369	Aatf;Apex1;App;Bcat1;Birc5;Ccnb1;Ccnd1;Ccng1;Cdkn2a;Cdt1;Chmp1a;Csnk2a1;Cul4b;Dbf4;Eif4e;Fbxo5;Fhl1;Hdac3;Hras1;Mad2l1;Mdm2;Nae1;Nanog;Pafah1b1;Pcbp4;Pim3;Plk1;Plk2;Ppp2r5c;Psrc1;Rcc1;Sbds;Terf1;Tipin;Top2a;Tpr;Tpx2;Trp53;Ube2c;Ube2l3;Ywhah;Zwint
Module5_esc	cellular_protein_localization	6.65446e-06	0.000131143	14143	552	1418	88	1.59004	Akap12;Akt1;Ap1m2;Ap1s1;Ap2a1;Ap3s1;Arcn1;Arl1;Arl6ip1;Aspscr1;Bag6;Bcap31;Bub3;Cd24a;Cdh1;Cenpa;Cltb;Cltc;Col1a1;Copa;Copb1;Copb2;Copg;Copz1;Cpe;Cse1l;Ehd1;Fnta;Folr1;Get4;Gipc1;Hspa4;Ipo4;Ipo7;Jup;Kdelr1;Klc1;Kpnb1;Lamtor2;Lmna;M6pr;Macf1;Mapk1;Mapk3;March5;Mdm2;Mff;Mtx2;Napa;Nop58;Pdcd6;Pes1;Plk1;Rab1;Rab11a;Rab2a;Rad21;Rraga;Samm50;Slc9a3r1;Snx2;Snx6;Spnb2;Srp14;Srp72;Srp9;Srpr;Ssr3;Syngr2;Ta…
Module5_esc	transport	6.78801e-06	0.000132525	14143	2101	1418	268	1.27225	1190003J15Rik;Aaas;Actr2;Agfg1;Ahctf1;Aim2;Akap12;Akt1;Alyref;Anxa1;Anxa6;Ap1m2;Ap1s1;Ap2a1;Ap3s1;Aplp1;Apoc1;App;Arcn1;Arf4;Arf5;Arl1;Arl6ip1;Asna1;Aspscr1;Atox1;Atp1b3;Atp2a2;Atp2c1;Atp5g1;Atp5j;Atp5j2;Atp5k;Atp6v0b;Atp6v0c;Atp6v0d1;Atp6v0e;Atp6v1b2;Atp6v1e1;Atp6v1f;Atp6v1g1;Bag6;Bak1;Bcap31;Calca;Canx;Ccdc23;Ccnd1;Cd24a;Chmp1a;Chmp2a;Chmp4b;Clic4;Clns1a;Cltb;Cltc;Cmah;Col1a1;Copa;Copb1;Copb2;C…
Module5_esc	nucleoside_triphosphate_catabolic_process	7.42249e-06	0.000143529	14143	243	1418	47	1.92911	Adss;Arl1;Asna1;Atp2a2;Atp2c1;Atp5j;Atp5j2;Atp5k;Atp6v0b;Atp6v0c;Atp6v0d1;Atp6v1g1;Enpp3;Gnai3;Gnl2;Gnl3;Hras1;Itpa;Macf1;Mras;Msh2;Msh6;Myh10;Myh9;Nudt1;Ola1;Ppp2r4;Psmc2;Rab11a;Rab2a;Rab5c;Rac1;Rap1b;Rheb;Rhoa;Rras;Sept2;Smarca4;Smarca5;Srpr;Top2a;Tuba4a;Tubb2a;Tubb2b;Tubb3;Tubb6;Vps4b
Module5_esc	ribonucleotide_biosynthetic_process	7.48908e-06	0.000143529	14143	74	1418	21	2.83043	Adk;Adsl;Adss;Ak2;Atic;Atp2a2;Atp2c1;Atp5g1;Atp5j;Atp5j2;Atp5k;Cad;Ctps;Gart;Guk1;Hprt;Impdh2;Nme1;Nme4;Pnp;Prps1
Module5_esc	carbohydrate_derivative_metabolic_process	7.73036e-06	0.000146807	14143	562	1418	89	1.5795	Adk;Adss;Ak2;Akr1b3;Akr7a5;Arl1;Asna1;Atic;Atp2a2;Atp2c1;Atp5j;Atp5j2;Atp5k;Atp6v0b;Atp6v0c;Atp6v0d1;Atp6v1g1;BC048355;Bgn;Cad;Cmah;Ctps;Dcakd;Ddost;Dhcr24;Dnmt1;Dnmt3a;Dnmt3b;Dtymk;Galnt1;Ganab;Gnai3;Gnl2;Gnl3;Guk1;Hprt;Hras1;Impdh2;Itpa;Krtcap2;Macf1;Mat2a;Mras;Msh2;Msh6;Myh10;Myh9;Nme1;Nme4;Nt5c;Nudt1;Ogt;Ola1;Pcmt1;Pfkl;Pfkp;Pnp;Porcn;Ppp2r4;Prkcsh;Prps1;Psmc2;Rab11a;Rab2a;Rab5c;Rac1;Rap1b;Rh…
Module5_esc	regulation_of_proteasomal_protein_catabolic_process	8.46211e-06	0.000159255	14143	58	1418	18	3.09535	Akt1;Bag6;Fbxo5;Gipc1;Hspbp1;Mad2l1;Mdm2;Plk1;Psmd14;Psme3;Rad23b;Stub1;Sumo1;Ube2v2;Ubqln4;Ubxn1;Usp14;Usp5
Module5_esc	cellular_nitrogen_compound_catabolic_process	9.3668e-06	0.000172828	14143	303	1418	55	1.81045	Adss;Arl1;Asna1;Atp2a2;Atp2c1;Atp5j;Atp5j2;Atp5k;Atp6v0b;Atp6v0c;Atp6v0d1;Atp6v1g1;BC048355;Blvrb;Crmp1;Enpp3;Gnai3;Gnl2;Gnl3;Hmox1;Hprt;Hras1;Itpa;Macf1;Mras;Msh2;Msh6;Myh10;Myh9;Nt5c;Nudt1;Ola1;Pnp;Ppp2r4;Psmc2;Rab11a;Rab2a;Rab5c;Rac1;Rap1b;Rheb;Rhoa;Rras;Sept2;Smarca4;Smarca5;Srpr;Top2a;Tuba4a;Tubb2a;Tubb2b;Tubb3;Tubb6;Upp1;Vps4b
Module5_esc	cellular_ketone_metabolic_process	9.42852e-06	0.000172828	14143	533	1418	85	1.59059	Aars;Acly;Aco2;Acot7;Adipor1;Adss;Ahcy;Aldh18a1;Amt;Ass1;Bcat1;Bcat2;Cars;Cmah;Cs;Ctps;Cyb5;Dars;Ddah2;Degs1;Dld;Dlst;Dnmt1;Dnmt3a;Dnmt3b;Dohh;Ech1;Echs1;Eci2;Eprs;Fads2;Farsa;Farsb;Fasn;Folr1;Gart;Gcsh;Gldc;Glo1;Glud1;Glul;Got2;Gsr;Gsto1;Gstp2;Hadh;Hars;Hibadh;Iars;Idh2;Idh3a;Idh3b;Idh3g;Lars;Ldhb;Lypla1;Mars;Mat2a;Mdh1;Mthfd1;Mthfd1l;Nars;Ndufab1;Pck2;Pcmt1;Pdha1;Pdhb;Pgd;Ptges3;Pycr2;Rars;Scd2…
Module5_esc	purine_nucleoside_triphosphate_catabolic_process	9.43149e-06	0.000172828	14143	238	1418	46	1.92773	Adss;Arl1;Asna1;Atp2a2;Atp2c1;Atp5j;Atp5j2;Atp5k;Atp6v0b;Atp6v0c;Atp6v0d1;Atp6v1g1;Gnai3;Gnl2;Gnl3;Hras1;Itpa;Macf1;Mras;Msh2;Msh6;Myh10;Myh9;Nudt1;Ola1;Ppp2r4;Psmc2;Rab11a;Rab2a;Rab5c;Rac1;Rap1b;Rheb;Rhoa;Rras;Sept2;Smarca4;Smarca5;Srpr;Top2a;Tuba4a;Tubb2a;Tubb2b;Tubb3;Tubb6;Vps4b
Module5_esc	methylation-dependent_chromatin_silencing	1.00673e-05	0.000182875	14143	5	1418	5	9.97391	Dnmt3a;Dnmt3b;Hells;Mbd3;Smarca4
Module5_esc	purine_ribonucleotide_catabolic_process	1.05694e-05	0.000189827	14143	239	1418	46	1.91966	Adss;Arl1;Asna1;Atp2a2;Atp2c1;Atp5j;Atp5j2;Atp5k;Atp6v0b;Atp6v0c;Atp6v0d1;Atp6v1g1;Gnai3;Gnl2;Gnl3;Hprt;Hras1;Itpa;Macf1;Mras;Msh2;Msh6;Myh10;Myh9;Ola1;Ppp2r4;Psmc2;Rab11a;Rab2a;Rab5c;Rac1;Rap1b;Rheb;Rhoa;Rras;Sept2;Smarca4;Smarca5;Srpr;Top2a;Tuba4a;Tubb2a;Tubb2b;Tubb3;Tubb6;Vps4b
Module5_esc	nucleotide_catabolic_process	1.06318e-05	0.000189827	14143	275	1418	51	1.84971	Adss;Arl1;Asna1;Atp2a2;Atp2c1;Atp5j;Atp5j2;Atp5k;Atp6v0b;Atp6v0c;Atp6v0d1;Atp6v1g1;BC048355;Enpp3;Gnai3;Gnl2;Gnl3;Hprt;Hras1;Itpa;Macf1;Mras;Msh2;Msh6;Myh10;Myh9;Nt5c;Nudt1;Ola1;Ppp2r4;Psmc2;Rab11a;Rab2a;Rab5c;Rac1;Rap1b;Rheb;Rhoa;Rras;Sept2;Smarca4;Smarca5;Srpr;Top2a;Tuba4a;Tubb2a;Tubb2b;Tubb3;Tubb6;Upp1;Vps4b
Module5_esc	posttranscriptional_regulation_of_gene_expression	1.18008e-05	0.000208913	14143	276	1418	51	1.843	Aars;Aarsd1;Abcf1;Akt1;Apex1;Aplp1;App;Bag6;Caprin1;Carhsp1;Cdkn2a;Dhx9;Dpm3;Eif2a;Eif2b5;Eif2s1;Eif3b;Eif4a3;Eif4e;Eif4e2;Fxr1;Gipc1;Ifi30;Igf2bp1;Lin28a;Lsm14a;Magoh;Mapk1;Mapk3;Mdm2;Nckap1;Ndufa13;Ngdn;Pa2g4;Paip1;Paip2;Plk1;Poldip3;Pum2;Sarnp;Serp1;Srp14;Srp9;Srrt;Syncrip;Tarbp2;Tardbp;Tbrg1;Tcf3;Ube2b;Usp7
Module5_esc	nucleobase-containing_compound_catabolic_process	1.22703e-05	0.000215401	14143	291	1418	53	1.81655	Adss;Arl1;Asna1;Atp2a2;Atp2c1;Atp5j;Atp5j2;Atp5k;Atp6v0b;Atp6v0c;Atp6v0d1;Atp6v1g1;BC048355;Crmp1;Enpp3;Gnai3;Gnl2;Gnl3;Hprt;Hras1;Itpa;Macf1;Mras;Msh2;Msh6;Myh10;Myh9;Nt5c;Nudt1;Ola1;Pnp;Ppp2r4;Psmc2;Rab11a;Rab2a;Rab5c;Rac1;Rap1b;Rheb;Rhoa;Rras;Sept2;Smarca4;Smarca5;Srpr;Top2a;Tuba4a;Tubb2a;Tubb2b;Tubb3;Tubb6;Upp1;Vps4b
Module5_esc	negative_regulation_of_gene_expression,_epigenetic	1.24371e-05	0.000216509	14143	21	1418	10	4.74948	Dnmt3a;Dnmt3b;Hat1;Hdac2;Hells;Mbd3;Smarca4;Smarca5;Ube2b;Ubtf
Module5_esc	purine_ribonucleoside_triphosphate_catabolic_process	1.3428e-05	0.000231827	14143	234	1418	45	1.91806	Adss;Arl1;Asna1;Atp2a2;Atp2c1;Atp5j;Atp5j2;Atp5k;Atp6v0b;Atp6v0c;Atp6v0d1;Atp6v1g1;Gnai3;Gnl2;Gnl3;Hras1;Itpa;Macf1;Mras;Msh2;Msh6;Myh10;Myh9;Ola1;Ppp2r4;Psmc2;Rab11a;Rab2a;Rab5c;Rac1;Rap1b;Rheb;Rhoa;Rras;Sept2;Smarca4;Smarca5;Srpr;Top2a;Tuba4a;Tubb2a;Tubb2b;Tubb3;Tubb6;Vps4b
Module5_esc	heterocycle_catabolic_process	1.35645e-05	0.000232264	14143	292	1418	53	1.81033	Adss;Arl1;Asna1;Atp2a2;Atp2c1;Atp5j;Atp5j2;Atp5k;Atp6v0b;Atp6v0c;Atp6v0d1;Atp6v1g1;Blvrb;Crmp1;Gnai3;Gnl2;Gnl3;Hmox1;Hprt;Hras1;Itpa;Macf1;Mras;Msh2;Msh6;Mthfd1;Myh10;Myh9;Nt5c;Nudt1;Ola1;Pnp;Ppp2r4;Psmc2;Rab11a;Rab2a;Rab5c;Rac1;Rap1b;Rheb;Rhoa;Rras;Sept2;Smarca4;Smarca5;Srpr;Top2a;Tuba4a;Tubb2a;Tubb2b;Tubb3;Tubb6;Vps4b
Module5_esc	regulation_of_translation	1.46375e-05	0.0002486	14143	152	1418	33	2.16539	Aars;Aarsd1;Abcf1;Akt1;Aplp1;App;Caprin1;Eif2a;Eif2b5;Eif2s1;Eif3b;Eif4a3;Eif4e;Eif4e2;Fxr1;Igf2bp1;Lin28a;Lsm14a;Magoh;Mapk1;Mapk3;Ndufa13;Ngdn;Pa2g4;Paip1;Paip2;Poldip3;Pum2;Sarnp;Serp1;Srp14;Srp9;Tarbp2
Module5_esc	ribonucleoside_triphosphate_catabolic_process	1.50306e-05	0.000253217	14143	235	1418	45	1.9099	Adss;Arl1;Asna1;Atp2a2;Atp2c1;Atp5j;Atp5j2;Atp5k;Atp6v0b;Atp6v0c;Atp6v0d1;Atp6v1g1;Gnai3;Gnl2;Gnl3;Hras1;Itpa;Macf1;Mras;Msh2;Msh6;Myh10;Myh9;Ola1;Ppp2r4;Psmc2;Rab11a;Rab2a;Rab5c;Rac1;Rap1b;Rheb;Rhoa;Rras;Sept2;Smarca4;Smarca5;Srpr;Top2a;Tuba4a;Tubb2a;Tubb2b;Tubb3;Tubb6;Vps4b
Module5_esc	purine_ribonucleotide_biosynthetic_process	1.60908e-05	0.000268909	14143	66	1418	19	2.87128	Adk;Adsl;Adss;Ak2;Atic;Atp2a2;Atp2c1;Atp5g1;Atp5j;Atp5j2;Atp5k;Gart;Guk1;Hprt;Impdh2;Nme1;Nme4;Pnp;Prps1
Module5_esc	ribonucleotide_catabolic_process	1.65077e-05	0.000273687	14143	243	1418	46	1.88806	Adss;Arl1;Asna1;Atp2a2;Atp2c1;Atp5j;Atp5j2;Atp5k;Atp6v0b;Atp6v0c;Atp6v0d1;Atp6v1g1;Gnai3;Gnl2;Gnl3;Hprt;Hras1;Itpa;Macf1;Mras;Msh2;Msh6;Myh10;Myh9;Ola1;Ppp2r4;Psmc2;Rab11a;Rab2a;Rab5c;Rac1;Rap1b;Rheb;Rhoa;Rras;Sept2;Smarca4;Smarca5;Srpr;Top2a;Tuba4a;Tubb2a;Tubb2b;Tubb3;Tubb6;Vps4b
Module5_esc	protein_transport	1.88967e-05	0.000310828	14143	738	1418	109	1.47311	Ahctf1;Aim2;Akap12;Akt1;Ap1m2;Ap1s1;Ap2a1;Ap3s1;Arcn1;Arf4;Arf5;Arl6ip1;Aspscr1;Bcap31;Ccdc23;Cd24a;Chmp1a;Chmp2a;Chmp4b;Cltb;Cltc;Col1a1;Copa;Copb1;Copb2;Copg;Copz1;Cse1l;Ehd1;Erp29;Folr1;Gabarap;Gabarapl2;Gipc1;Guk1;Hspa4;Ipo4;Ipo7;Kdelr1;Klc1;Kpnb1;Lmna;M6pr;Macf1;Mapk1;Mapk3;Mff;Mtx2;Myh9;Napa;Nasp;Nmd3;Nop58;Nup43;Nup62;Nup85;Nup88;Nup93;Pafah1b1;Pdcd6;Pnp;Preb;Rab1;Rab11a;Rab1b;Rab2a;Rab5c;…
Module5_esc	cellular_amino_acid_metabolic_process	2.28334e-05	0.000372648	14143	246	1418	46	1.86504	Aars;Adss;Ahcy;Aldh18a1;Amt;Ass1;Bcat1;Bcat2;Cars;Ctps;Dars;Ddah2;Dnmt1;Dnmt3a;Dnmt3b;Dohh;Eprs;Farsa;Farsb;Folr1;Gart;Gcsh;Gldc;Glo1;Glud1;Glul;Got2;Gsr;Gstp2;Hars;Hibadh;Iars;Lars;Mars;Mat2a;Mthfd1;Nars;Pcmt1;Pycr2;Rars;Shmt2;Tars;Txnrd1;Vars;Wars;Yars
Module5_esc	DNA-dependent_DNA_replication_initiation	2.30285e-05	0.000372919	14143	11	1418	7	6.34703	Ccne1;Mcm2;Mcm3;Mcm4;Mcm5;Mcm6;Mcm7
Module5_esc	establishment_of_protein_localization_in_endoplasmic_reticulum	2.35595e-05	0.000375693	14143	8	1418	6	7.48043	Folr1;Macf1;Srp14;Srp72;Srp9;Srpr
Module5_esc	protein_targeting_to_ER	2.35595e-05	0.000375693	14143	8	1418	6	7.48043	Folr1;Macf1;Srp14;Srp72;Srp9;Srpr
Module5_esc	protein_localization	2.46413e-05	0.00038993	14143	995	1418	139	1.39334	Ahctf1;Aim2;Akap12;Akt1;Ap1m2;Ap1s1;Ap2a1;Ap3s1;Arcn1;Arf4;Arf5;Arl1;Arl6ip1;Aspscr1;Bag6;Bcap31;Birc5;Bub3;Ccdc23;Cd24a;Cd81;Cdh1;Cenpa;Chmp1a;Chmp2a;Chmp4b;Cltb;Cltc;Col1a1;Copa;Copb1;Copb2;Copg;Copz1;Cpe;Cse1l;Dhcr24;Dnmt3b;Ehd1;Erp29;Fnta;Folr1;Gabarap;Gabarapl2;Get4;Gipc1;Guk1;Hspa4;Hspg2;Ipo4;Ipo7;Jup;Kdelr1;Klc1;Kpnb1;Lamtor2;Lmna;M6pr;Macf1;Mapk1;Mapk3;March5;Mdm2;Mff;Mtx2;Myh9;Napa;Nasp;…
Module5_esc	dicarboxylic_acid_metabolic_process	2.48256e-05	0.00038993	14143	36	1418	13	3.60169	Cs;Dld;Dlst;Got2;Idh3a;Idh3b;Idh3g;Mdh1;Pck2;Sdha;Sdhb;Sucla2;Suclg1
Module5_esc	purine-containing_compound_catabolic_process	2.6588e-05	0.000414494	14143	262	1418	48	1.82728	Adss;Arl1;Asna1;Atp2a2;Atp2c1;Atp5j;Atp5j2;Atp5k;Atp6v0b;Atp6v0c;Atp6v0d1;Atp6v1g1;Gnai3;Gnl2;Gnl3;Hprt;Hras1;Itpa;Macf1;Mras;Msh2;Msh6;Myh10;Myh9;Nudt1;Ola1;Pnp;Ppp2r4;Psmc2;Rab11a;Rab2a;Rab5c;Rac1;Rap1b;Rheb;Rhoa;Rras;Sept2;Smarca4;Smarca5;Srpr;Top2a;Tuba4a;Tubb2a;Tubb2b;Tubb3;Tubb6;Vps4b
Module5_esc	purine_nucleotide_catabolic_process	3.03958e-05	0.000470347	14143	256	1418	47	1.83115	Adss;Arl1;Asna1;Atp2a2;Atp2c1;Atp5j;Atp5j2;Atp5k;Atp6v0b;Atp6v0c;Atp6v0d1;Atp6v1g1;Gnai3;Gnl2;Gnl3;Hprt;Hras1;Itpa;Macf1;Mras;Msh2;Msh6;Myh10;Myh9;Nudt1;Ola1;Ppp2r4;Psmc2;Rab11a;Rab2a;Rab5c;Rac1;Rap1b;Rheb;Rhoa;Rras;Sept2;Smarca4;Smarca5;Srpr;Top2a;Tuba4a;Tubb2a;Tubb2b;Tubb3;Tubb6;Vps4b
Module5_esc	nucleoside_metabolic_process	3.12451e-05	0.000479934	14143	213	1418	41	1.91986	Adk;Adss;Arl1;Atic;Cad;Ctps;Dcakd;Dnmt1;Dnmt3a;Dnmt3b;Gnai3;Gnl2;Gnl3;Guk1;Hprt;Hras1;Impdh2;Mat2a;Mras;Nme1;Nme4;Pcmt1;Pnp;Prps1;Rab11a;Rab2a;Rab5c;Rac1;Rap1b;Rheb;Rhoa;Rras;Sept2;Srpr;Tk1;Tuba4a;Tubb2a;Tubb2b;Tubb3;Tubb6;Upp1
Module5_esc	deoxyribonucleotide_metabolic_process	3.3428e-05	0.000509716	14143	23	1418	10	4.33648	Adk;Ak2;BC048355;Dtymk;Guk1;Nt5c;Nudt1;Pnp;Rrm1;Tyms
Module5_esc	cell_cycle_checkpoint	3.44687e-05	0.000521776	14143	112	1418	26	2.31537	Bcat1;Birc5;Bub3;Ccnb1;Ccnd1;Ccng1;Cdkn2a;Cdt1;Csnk2a1;H2afx;Hormad1;Hras1;Mad2l1;Mdm2;Msh2;Nae1;Pcbp4;Plk1;Plk2;Ppp2r5c;Terf1;Tipin;Top2a;Tpr;Trp53;Zwint
Module5_esc	macromolecule_methylation	3.65232e-05	0.000548898	14143	106	1418	25	2.35234	Ash2l;Carm1;Ctcf;Dnmt1;Dnmt3a;Dnmt3b;Dpy30;Eed;Etf1;Ezh2;Ftsj3;Gspt1;Hells;Ilf3;Meg3;Mta2;Nsun2;Pcmt1;Prmt5;Setd8;Smarca4;Trmt112;Wdr5;Wdr61;Zfp57
Module5_esc	cellular_localization	3.74286e-05	0.000558488	14143	1012	1418	140	1.37979	Aaas;Actr2;Actr3;Aim2;Akap12;Akt1;Alyref;Anxa1;Ap1m2;Ap1s1;Ap2a1;Ap3s1;App;Arcn1;Arl1;Arl6ip1;Aspscr1;Atp2c1;Bag6;Bak1;Bcap31;Birc5;Bub3;Ccdc23;Ccnb1;Cd24a;Cdh1;Cenpa;Cltb;Cltc;Col1a1;Copa;Copb1;Copb2;Copg;Copz1;Cpe;Cse1l;Cul3;Ddx39;Dpy30;Ehd1;Enah;Erp29;Exosc10;Fnta;Folr1;Gabarapl2;Get4;Gipc1;Hspa4;Inhba;Ipo4;Ipo7;Jup;Kdelr1;Klc1;Kpnb1;Lamtor2;Lmna;Ltbp4;M6pr;Macf1;Mapk1;Mapk3;March5;Mdm2;Meg3;M…
Module5_esc	establishment_of_protein_localization	3.93615e-05	0.000583164	14143	759	1418	110	1.44549	Ahctf1;Aim2;Akap12;Akt1;Ap1m2;Ap1s1;Ap2a1;Ap3s1;Arcn1;Arf4;Arf5;Arl6ip1;Aspscr1;Bcap31;Ccdc23;Cd24a;Chmp1a;Chmp2a;Chmp4b;Cltb;Cltc;Col1a1;Copa;Copb1;Copb2;Copg;Copz1;Cse1l;Ehd1;Erp29;Folr1;Gabarap;Gabarapl2;Gipc1;Guk1;Hspa4;Ipo4;Ipo7;Kdelr1;Klc1;Kpnb1;Lmna;M6pr;Macf1;Mapk1;Mapk3;Mdm2;Mff;Mtx2;Myh9;Napa;Nasp;Nmd3;Nop58;Nup43;Nup62;Nup85;Nup88;Nup93;Pafah1b1;Pdcd6;Pnp;Preb;Rab1;Rab11a;Rab1b;Rab2a;R…
Module5_esc	ribonucleoprotein_complex_assembly	3.99722e-05	0.000588042	14143	70	1418	19	2.7072	Ccrn4l;Celf1;Eif2a;Eif3a;Eif6;Lsm14a;Lsm2;Pih1d1;Prmt5;Prpf19;Prpf31;Psip1;Pum2;Rbmxl1;Sbds;Snrpc;Srsf1;Srsf10;Tarbp2
Module5_esc	protein_localization_in_mitochondrion	4.23361e-05	0.000618463	14143	28	1418	11	3.91832	Hspa4;March5;Mff;Mtx2;Samm50;Timm13;Timm8b;Tomm20;Tomm22;Tomm40;Tomm5
Module5_esc	nicotinamide_nucleotide_metabolic_process	4.64553e-05	0.000673925	14143	43	1418	14	3.24732	Dlst;Glyr1;Hibadh;Idh3a;Idh3b;Idh3g;Ldhb;Mdh1;Pgd;Pgls;Pnp;Prdx5;Tkt;Txnrd1
Module5_esc	carbohydrate_derivative_catabolic_process	4.68139e-05	0.000674443	14143	290	1418	51	1.75403	Adss;Arl1;Asna1;Atp2a2;Atp2c1;Atp5j;Atp5j2;Atp5k;Atp6v0b;Atp6v0c;Atp6v0d1;Atp6v1g1;BC048355;Dhcr24;Gnai3;Gnl2;Gnl3;Hprt;Hras1;Itpa;Macf1;Mras;Msh2;Msh6;Myh10;Myh9;Nt5c;Nudt1;Ola1;Pnp;Ppp2r4;Psmc2;Rab11a;Rab2a;Rab5c;Rac1;Rap1b;Rheb;Rhoa;Rras;Sept2;Smarca4;Smarca5;Srpr;Top2a;Tuba4a;Tubb2a;Tubb2b;Tubb3;Tubb6;Vps4b
Module5_esc	response_to_DNA_damage_stimulus	4.80528e-05	0.000687551	14143	413	1418	67	1.61804	Actl6a;Aen;Apex1;Ash2l;Bag6;Bcat1;Bccip;Ccnd1;Ccng1;Cdk9;Chaf1b;Cul4b;Ddx1;Eef1e1;Gadd45a;H2afx;Hmox1;Huwe1;Kif22;Lig1;Mapk1;Mapk3;Mcm7;Mcrs1;Mdm2;Morf4l2;Msh2;Msh6;Nsmce1;Nudt1;Nupr1;Parp1;Pcbp4;Plk1;Ppp2r5c;Prpf19;Pttg1;Rad21;Rad23b;Rbx1;Rpa1;Rpa3;Rps6ka6;Ruvbl1;Sfn;Sfr1;Smarca5;Smc4;Stra13;Stub1;Supt16h;Tipin;Top2a;Trp53;Ube2a;Ube2b;Ube2n;Ube2v1;Ube2v2;Ubr5;Uhrf1;Ung;Usp1;Usp10;Usp7;Xrcc5;Xrn2
Module5_esc	RNA_localization	5.02676e-05	0.000714346	14143	83	1418	21	2.52352	Ahctf1;Alyref;Ddx39;Eif4a3;Exosc10;G3bp2;Igf2bp1;Magoh;Mrpl18;Nup43;Nup62;Nup85;Nup88;Nup93;Nxf1;Pabpn1;Sec13;Slbp;Srsf10;Thoc7;Xpo1
Module5_esc	localization	5.30897e-05	0.000749353	14143	2647	1418	321	1.20953	1190003J15Rik;Aaas;Actr2;Actr3;Agfg1;Ahctf1;Aim2;Aimp1;Akap12;Akt1;Alyref;Anxa1;Anxa6;Ap1m2;Ap1s1;Ap2a1;Ap3s1;Aplp1;Apoc1;App;Arcn1;Arf4;Arf5;Arhgef7;Arid5b;Arl1;Arl6ip1;Asna1;Aspscr1;Atox1;Atp1b3;Atp2a2;Atp2c1;Atp5g1;Atp5j;Atp5j2;Atp5k;Atp6v0b;Atp6v0c;Atp6v0d1;Atp6v0e;Atp6v1b2;Atp6v1e1;Atp6v1f;Atp6v1g1;Bag6;Bak1;Bcap31;Birc5;Bub3;Calca;Canx;Ccdc23;Ccnb1;Ccnd1;Cd151;Cd24a;Cd81;Cdh1;Cenpa;Cenpv;Ch…
Module5_esc	isocitrate_metabolic_process	5.53732e-05	0.00077634	14143	6	1418	5	8.31159	Aco2;Idh2;Idh3a;Idh3b;Idh3g
Module5_esc	protein_targeting_to_membrane	5.65153e-05	0.000781858	14143	49	1418	15	3.05324	Arl6ip1;Folr1;Hspa4;Macf1;Samm50;Spnb2;Srp14;Srp72;Srp9;Srpr;Ssr3;Timm13;Timm8b;Tmed2;Tomm22
Module5_esc	regulation_of_proteasomal_ubiquitin-dependent_protein_catabolic_process	5.65153e-05	0.000781858	14143	49	1418	15	3.05324	Akt1;Bag6;Fbxo5;Gipc1;Hspbp1;Mad2l1;Mdm2;Plk1;Rad23b;Stub1;Sumo1;Ube2v2;Ubqln4;Ubxn1;Usp5
Module5_esc	ncRNA_processing	5.778e-05	0.000787612	14143	190	1418	37	1.94229	Aars;Bop1;Cdkn2a;D10Wsu52e;Dcaf13;Dkc1;Eif4a3;Emg1;Exosc10;Exosc3;Exosc8;Fcf1;Ftsj3;Gar1;Imp3;Lin28a;Nhp2;Nob1;Nop10;Nop14;Npm3;Nsa2;Nsun2;Pa2g4;Pes1;Rpf1;Rpp25;Rrp1;Rrp9;Sbds;Srrt;Ssb;Tarbp2;Trmt1;Tsen34;Utp11l;Wdr12
Module5_esc	organic_substance_metabolic_process	5.79281e-05	0.000787612	14143	592	1418	89	1.49946	Adk;Adss;Ak2;Akr1b3;Akr7a5;Arl1;Asna1;Atic;Atp2a2;Atp2c1;Atp5j;Atp5j2;Atp5k;Atp6v0b;Atp6v0c;Atp6v0d1;Atp6v1g1;BC048355;Bgn;Cad;Cmah;Ctps;Dcakd;Ddost;Dhcr24;Dnmt1;Dnmt3a;Dnmt3b;Dtymk;Galnt1;Ganab;Gnai3;Gnl2;Gnl3;Guk1;Hprt;Hras1;Impdh2;Itpa;Krtcap2;Macf1;Mat2a;Mras;Msh2;Msh6;Myh10;Myh9;Nme1;Nme4;Nt5c;Nudt1;Ogt;Ola1;Pcmt1;Pfkl;Pfkp;Pnp;Porcn;Ppp2r4;Prkcsh;Prps1;Psmc2;Rab11a;Rab2a;Rab5c;Rac1;Rap1b;Rh…
Module5_esc	chromatin_organization	5.80624e-05	0.000787612	14143	392	1418	64	1.62839	0610010K14Rik;Actl6a;Aebp2;Ash2l;Bag6;Carm1;Cbx7;Ccnb1;Cdkn2a;Cenpa;Cenpv;Chaf1b;Chd3;Chd4;Ctbp1;Ctcf;Dnajc2;Dnmt1;Dnmt3a;Dnmt3b;Dpy30;Eed;Ezh2;H2afx;H2afy;Hat1;Hdac1;Hdac2;Hdac3;Hells;Hjurp;Huwe1;Jarid2;Kat2a;Kdm5b;Mbd3;Mcm2;Mcrs1;Morf4l2;Mta2;Nap1l4;Nasp;Ogt;Phb;Pim3;Prmt5;Rnf2;Ruvbl1;Setd8;Skp1a;Smarca4;Smarca5;Smarce1;Taf10;Tcf3;Terf1;Ube2a;Ube2b;Ube2e1;Ube2n;Uhrf1;Wdr5;Wdr61;Yeats4
Module5_esc	pyridine-containing_compound_metabolic_process	6.19022e-05	0.000825744	14143	44	1418	14	3.17352	Dlst;Glyr1;Hibadh;Idh3a;Idh3b;Idh3g;Ldhb;Mdh1;Pgd;Pgls;Pnp;Prdx5;Tkt;Txnrd1
Module5_esc	pyridine_nucleotide_metabolic_process	6.19022e-05	0.000825744	14143	44	1418	14	3.17352	Dlst;Glyr1;Hibadh;Idh3a;Idh3b;Idh3g;Ldhb;Mdh1;Pgd;Pgls;Pnp;Prdx5;Tkt;Txnrd1
Module5_esc	respiratory_electron_transport_chain	6.20592e-05	0.000825744	14143	29	1418	11	3.78321	Dld;Mybbp1a;Ndufa5;Ndufb8;Ndufc2;Ndufs1;Ndufv2;Sdha;Sdhb;Sdhd;Uqcrc1
Module5_esc	ATP_metabolic_process	6.3717e-05	0.000842436	14143	129	1418	28	2.16488	Ak2;Asna1;Atp1b3;Atp2a2;Atp2c1;Atp5g1;Atp5j;Atp5j2;Atp5k;Atp6v0b;Atp6v0c;Atp6v0d1;Atp6v1b2;Atp6v1g1;Guk1;Macf1;Msh2;Msh6;Myh10;Myh9;Ndufs1;Ola1;Ppp2r4;Psmc2;Smarca4;Smarca5;Top2a;Vps4b
Module5_esc	DNA_conformation_change	6.51359e-05	0.000855779	14143	116	1418	26	2.23553	Acin1;Cdkn2a;Cenpa;Cenpv;Chaf1b;Chmp1a;Ctcf;Ddx1;H2afx;H2afy;Hells;Hjurp;Mcm2;Mcm4;Mcm6;Mcm7;Mta2;Nap1l4;Ncapd2;Ncaph2;Ruvbl1;Smarca4;Smarca5;Smc4;Top2a;Top3b
Module5_esc	cytokinesis	6.99936e-05	0.000913854	14143	61	1418	17	2.77961	Actr2;Actr3;Ahctf1;Anln;Birc5;Cul3;Dctn3;Incenp;Klhl13;Myh10;Myh9;Plk1;Rab11a;Rhoc;Sept2;Son;Spnb2
Module5_esc	protein_complex_subunit_organization	7.20079e-05	0.000934313	14143	490	1418	76	1.54697	Adrm1;Adsl;Ahctf1;Anxa5;Apoa1bp;Arpc4;Ccnb1;Cdh1;Cenpa;Clpp;Col1a1;Col1a2;Ctnna1;Ehd1;Etf1;Fbxo5;Glul;Gmnn;Gsn;H2-Ke2;Hmox1;Hprt;Hras1;Hsd17b10;Hspa4;Ict1;Ilk;Impdh2;Jup;Lamc1;Mapk3;Max;Mdm2;Mff;Mgp;Nacc1;Napa;Ndufs5;Ndufs7;Ndufs8;Nudt21;Nupr1;Ogt;Pfkl;Pfkp;Picalm;Ppp5c;Prkcsh;Psmg1;Rbmxl1;Rrm1;Sept11;Sept2;Sept7;Sept9;Sh3glb1;Shmt2;Sqstm1;St13;Taf10;Tbca;Terf1;Tfam;Tk1;Trim6;Trp53;Tuba4a;Tubb2a;…
Module5_esc	regulation_of_histone_modification	7.33273e-05	0.000940507	14143	50	1418	15	2.99217	Ccnb1;Cdk9;Ctbp1;Ctcf;Dnmt1;Dnmt3b;Dppa2;Jarid2;Mapk3;Ogt;Taf7;Trp53;Ube2b;Ube2n;Wdr61
Module5_esc	mRNA_transport	7.33857e-05	0.000940507	14143	67	1418	18	2.67956	Ahctf1;Alyref;Ddx39;Eif4a3;G3bp2;Magoh;Nup43;Nup62;Nup85;Nup88;Nup93;Nxf1;Pabpn1;Sec13;Slbp;Srsf10;Thoc7;Xpo1
Module5_esc	cellular_process_involved_in_reproduction	7.39468e-05	0.00094192	14143	265	1418	47	1.76896	Actr2;Actr3;Adrm1;Agfg1;Akt1;Bag6;Bub3;Calca;Ccnb1;Ccnd1;Cd9;Celf1;Cks2;Dld;Dnmt3a;Fbxo5;H2afx;Hormad1;Inhba;Itga3;Jup;Lin28a;Mki67;Msh2;Msh6;Myh9;Nr0b1;Pafah1b1;Plaur;Plk1;Psap;Psmd13;Pttg1;Rpa1;Sf1;Smc4;Stra13;Syce2;Tex19.1;Tial1;Tnc;Top2a;Ubap2l;Ube2b;Usf1;Wdr77;Zfp42
Module6_esc	translation	2.12872e-45	2.56298e-42	14143	389	428	81	6.88071	Eef1a1;Eef1b2;Eef1d;Eef1g;Eef2;Eif1;Eif2s2;Eif3c;Eif3d;Eif3e;Eif3h;Eif3i;Eif3k;Eif3l;Eif3m;Eif4a1;Eif4a2;Eif4b;Eif4g1;Eif4g2;Eif5a;Gars;Kars;Lars2;Rbm3;Rpl10;Rpl11;Rpl13;Rpl14;Rpl15;Rpl18;Rpl18a;Rpl19;Rpl22;Rpl22l1;Rpl23;Rpl24;Rpl26;Rpl28;Rpl29;Rpl3;Rpl32;Rpl37a;Rpl38;Rpl39;Rpl4;Rpl6;Rpl7;Rpl8;Rpl9;Rplp0;Rplp1;Rplp2;Rpn2;Rps11;Rps14;Rps15;Rps15a;Rps16;Rps17;Rps18;Rps19;Rps2;Rps20;Rps21;Rps23;Rps2…
Module6_esc	metabolic_process	4.55403e-30	2.74153e-27	14143	6288	428	305	1.60282	Adh5;Akr1a1;Aldh2;Aldoa;Anp32a;Apoe;Aprt;Asns;Atf4;Atp1a1;Atp5a1;Atp5b;Atp5c1;Atp5d;Atp5e;Atp5f1;Atp5g3;Atp5h;Atp5l;Atp5o;Atpif1;Banf1;Bax;Btf3;Bzw1;Calr;Capns1;Cct2;Cct3;Cct4;Cct5;Cct6a;Cct7;Cct8;Cdc42;Cdk1;Cdk4;Cfl1;Ckb;Cnbp;Cox4i1;Cox5a;Cox6a1;Cox6b1;Cox6c;Cox7c;Cox8a;Csda;Ctgf;Cth;Ctnnb1;Cyr61;Dctpp1;Ddb1;Ddx39b;Ddx3x;Ddx5;Dnaja1;Dynll1;Ebna1bp2;Edf1;Eef1a1;Eef1b2;Eef1d;Eef1g;Eef2;Eif1;Eif2s2…
Module6_esc	cellular_metabolic_process	3.07302e-29	1.23331e-26	14143	5514	428	280	1.67799	Adh5;Akr1a1;Aldoa;Anp32a;Apoe;Aprt;Asns;Atf4;Atp1a1;Atp5a1;Atp5b;Atp5c1;Atp5d;Atp5e;Atp5f1;Atp5g3;Atp5h;Atp5l;Atp5o;Atpif1;Banf1;Bax;Btf3;Bzw1;Calr;Cct2;Cct3;Cct4;Cct5;Cct6a;Cct7;Cct8;Cdc42;Cdk1;Cdk4;Cfl1;Ckb;Cnbp;Csda;Ctgf;Cth;Ctnnb1;Cyr61;Dctpp1;Ddb1;Ddx39b;Ddx3x;Ddx5;Dnaja1;Dynll1;Ebna1bp2;Edf1;Eef1a1;Eef1b2;Eef1d;Eef1g;Eef2;Eif1;Eif2s2;Eif3c;Eif3d;Eif3e;Eif3h;Eif3i;Eif3k;Eif3l;Eif3m;Eif4a1;Ei…
Module6_esc	cellular_process	1.61858e-27	4.87192e-25	14143	8865	428	368	1.37172	2700094K13Rik;Actb;Actg1;Actn4;Adh5;Akr1a1;Aldoa;Anp32a;Anp32b;Anxa2;Ap2m1;Ap2s1;Apoe;Aprt;Arf1;Arhgdia;Asns;Atf4;Atp1a1;Atp5a1;Atp5b;Atp5c1;Atp5d;Atp5e;Atp5f1;Atp5g3;Atp5h;Atp5l;Atp5o;Atpif1;Banf1;Bax;Bex1;Btf3;Bzw1;Cacybp;Calm1;Calm2;Calr;Cap1;Capzb;Cct2;Cct3;Cct4;Cct5;Cct6a;Cct7;Cct8;Cd63;Cdc42;Cdk1;Cdk4;Cfl1;Ckb;Cks1b;Clic1;Cnbp;Cnn2;Cnn3;Cox6c;Cox7c;Csda;Cst3;Ctgf;Cth;Ctnnb1;Cyr61;Dctpp1;Ddb…
Module6_esc	cellular_protein_metabolic_process	5.51591e-25	1.32823e-22	14143	2060	428	146	2.34198	Adh5;Bax;Calr;Cct2;Cct3;Cct4;Cct5;Cct6a;Cct7;Cct8;Cdk1;Cdk4;Cfl1;Cth;Ddb1;Dnaja1;Eef1a1;Eef1b2;Eef1d;Eef1g;Eef2;Eif1;Eif2s2;Eif3c;Eif3d;Eif3e;Eif3h;Eif3i;Eif3k;Eif3l;Eif3m;Eif4a1;Eif4a2;Eif4b;Eif4g1;Eif4g2;Eif5a;Fkbp1a;Fkbp3;Fkbp4;Fn1;Gab1;Gars;Gnai2;Gpx1;Hsp90aa1;Hsp90ab1;Hsp90b1;Hspa5;Hspa8;Hspa9;Hspd1;Hspe1;Kars;Lars2;Mdh2;Morf4l1;Nedd4;Nme2;P4hb;Polr2f;Ppib;Ppp1ca;Prdx2;Prmt1;Psma4;Psma6;Psma…
Module6_esc	cellular_macromolecule_metabolic_process	3.0322e-21	6.08462e-19	14143	4112	428	216	1.73579	Adh5;Anp32a;Apoe;Atf4;Banf1;Bax;Btf3;Bzw1;Calr;Cct2;Cct3;Cct4;Cct5;Cct6a;Cct7;Cct8;Cdk1;Cdk4;Cfl1;Cnbp;Csda;Cth;Ctnnb1;Ddb1;Ddx39b;Ddx5;Dnaja1;Dynll1;Ebna1bp2;Edf1;Eef1a1;Eef1b2;Eef1d;Eef1g;Eef2;Eif1;Eif2s2;Eif3c;Eif3d;Eif3e;Eif3h;Eif3i;Eif3k;Eif3l;Eif3m;Eif4a1;Eif4a2;Eif4b;Eif4g1;Eif4g2;Eif5a;Ewsr1;Fbl;Fkbp1a;Fkbp3;Fkbp4;Fn1;Gab1;Gars;Gnai2;Gnas;Gpx1;H2afz;Hdgf;Hmga1;Hmgb1;Hmgb2;Hmgn1;Hnrnpa1;Hn…
Module6_esc	protein_metabolic_process	7.78307e-21	1.33869e-18	14143	2414	428	152	2.08067	Adh5;Bax;Calr;Capns1;Cct2;Cct3;Cct4;Cct5;Cct6a;Cct7;Cct8;Cdk1;Cdk4;Cfl1;Cth;Ddb1;Dnaja1;Eef1a1;Eef1b2;Eef1d;Eef1g;Eef2;Eif1;Eif2s2;Eif3c;Eif3d;Eif3e;Eif3h;Eif3i;Eif3k;Eif3l;Eif3m;Eif4a1;Eif4a2;Eif4b;Eif4g1;Eif4g2;Eif5a;Fkbp1a;Fkbp3;Fkbp4;Fn1;Gab1;Gars;Gnai2;Gpx1;Hsp90aa1;Hsp90ab1;Hsp90b1;Hspa5;Hspa8;Hspa9;Hspd1;Hspe1;Kars;Lars2;Mdh2;Morf4l1;Myc;Nedd4;Nme2;P4hb;Park7;Polr2f;Ppib;Ppp1ca;Prdx2;Prmt1…
Module6_esc	primary_metabolic_process	2.1785e-20	3.27865e-18	14143	5545	428	261	1.55538	Adh5;Akr1a1;Aldoa;Anp32a;Apoe;Aprt;Asns;Atf4;Atp1a1;Atp5a1;Atp5b;Atp5c1;Atp5d;Atp5e;Atp5f1;Atp5g3;Atp5h;Atp5l;Atp5o;Banf1;Bax;Btf3;Bzw1;Calr;Capns1;Cct2;Cct3;Cct4;Cct5;Cct6a;Cct7;Cct8;Cdc42;Cdk1;Cdk4;Cfl1;Cnbp;Csda;Cth;Ctnnb1;Dctpp1;Ddb1;Ddx39b;Ddx3x;Ddx5;Dnaja1;Dynll1;Ebna1bp2;Edf1;Eef1a1;Eef1b2;Eef1d;Eef1g;Eef2;Eif1;Eif2s2;Eif3c;Eif3d;Eif3e;Eif3h;Eif3i;Eif3k;Eif3l;Eif3m;Eif4a1;Eif4a2;Eif4b;Eif4…
Module6_esc	ribosomal_small_subunit_biogenesis	7.58055e-20	1.01411e-17	14143	23	428	16	22.9874	Npm1;Rps14;Rps15;Rps16;Rps17;Rps19;Rps2;Rps21;Rps24;Rps25;Rps28;Rps6;Rps7;Rps8;Rpsa;mt-Rnr1
Module6_esc	macromolecule_metabolic_process	4.37713e-18	5.27007e-16	14143	4465	428	220	1.62817	Adh5;Anp32a;Apoe;Atf4;Banf1;Bax;Btf3;Bzw1;Calr;Capns1;Cct2;Cct3;Cct4;Cct5;Cct6a;Cct7;Cct8;Cdk1;Cdk4;Cfl1;Cnbp;Csda;Cth;Ctnnb1;Ddb1;Ddx39b;Ddx5;Dnaja1;Dynll1;Ebna1bp2;Edf1;Eef1a1;Eef1b2;Eef1d;Eef1g;Eef2;Eif1;Eif2s2;Eif3c;Eif3d;Eif3e;Eif3h;Eif3i;Eif3k;Eif3l;Eif3m;Eif4a1;Eif4a2;Eif4b;Eif4g1;Eif4g2;Eif5a;Ewsr1;Fbl;Fkbp1a;Fkbp3;Fkbp4;Fn1;Gab1;Gars;Gnai2;Gnas;Gpx1;H2afz;Hdgf;Hmga1;Hmgb1;Hmgb2;Hmgn1;Hnr…
Module6_esc	gene_expression	1.02956e-17	1.1269e-15	14143	2319	428	141	2.00917	Anp32a;Atf4;Btf3;Bzw1;Cnbp;Csda;Ctnnb1;Ddx39b;Ddx5;Dynll1;Ebna1bp2;Edf1;Eef1a1;Eef1b2;Eef1d;Eef1g;Eef2;Eif1;Eif2s2;Eif3c;Eif3d;Eif3e;Eif3h;Eif3i;Eif3k;Eif3l;Eif3m;Eif4a1;Eif4a2;Eif4b;Eif4g1;Eif4g2;Eif5a;Ewsr1;Fbl;Gars;Hdgf;Hnrnpa1;Hnrnpa2b1;Hnrnpa3;Hnrnpab;Hnrnpd;Hnrnpf;Hnrnph1;Hnrnpk;Hnrnpl;Hnrnpm;Hnrnpu;Hspa8;Id1;Junb;Kars;Lars2;Morf4l1;Myc;Naca;Nono;Pabpc1;Pcbp1;Phb2;Polr2f;Pou5f1;Rbbp4;Rbbp7;…
Module6_esc	ATP_synthesis_coupled_proton_transport	2.12518e-16	1.96824e-14	14143	15	428	12	26.4355	Atp5a1;Atp5b;Atp5c1;Atp5d;Atp5e;Atp5f1;Atp5g3;Atp5h;Atp5l;Atp5o;mt-Atp6;mt-Atp8
Module6_esc	energy_coupled_proton_transport,_down_electrochemical_gradient	2.12518e-16	1.96824e-14	14143	15	428	12	26.4355	Atp5a1;Atp5b;Atp5c1;Atp5d;Atp5e;Atp5f1;Atp5g3;Atp5h;Atp5l;Atp5o;mt-Atp6;mt-Atp8
Module6_esc	biosynthetic_process	5.28227e-16	4.54275e-14	14143	2659	428	150	1.86411	Akr1a1;Aldoa;Anp32a;Apoe;Aprt;Asns;Atf4;Atp1a1;Atp5a1;Atp5b;Atp5c1;Atp5d;Atp5e;Atp5f1;Atp5g3;Atp5h;Atp5l;Atp5o;Btf3;Bzw1;Cnbp;Csda;Cth;Ctnnb1;Ddx5;Dynll1;Edf1;Eef1a1;Eef1b2;Eef1d;Eef1g;Eef2;Eif1;Eif2s2;Eif3c;Eif3d;Eif3e;Eif3h;Eif3i;Eif3k;Eif3l;Eif3m;Eif4a1;Eif4a2;Eif4b;Eif4g1;Eif4g2;Eif5a;Ewsr1;Gars;Gpi1;Hdgf;Hnrnpab;Hnrnpd;Hsp90aa1;Hspa8;Id1;Junb;Kars;Lars2;Mif;Morf4l1;Myc;Naca;Nme2;Nono;Odc1;Pa…
Module6_esc	cellular_biosynthetic_process	6.80561e-16	5.46264e-14	14143	2562	428	146	1.88309	Akr1a1;Aldoa;Anp32a;Apoe;Aprt;Asns;Atf4;Atp1a1;Atp5a1;Atp5b;Atp5c1;Atp5d;Atp5e;Atp5f1;Atp5g3;Atp5h;Atp5l;Atp5o;Btf3;Bzw1;Cnbp;Csda;Cth;Ctnnb1;Ddx5;Dynll1;Edf1;Eef1a1;Eef1b2;Eef1d;Eef1g;Eef2;Eif1;Eif2s2;Eif3c;Eif3d;Eif3e;Eif3h;Eif3i;Eif3k;Eif3l;Eif3m;Eif4a1;Eif4a2;Eif4b;Eif4g1;Eif4g2;Eif5a;Ewsr1;Gars;Gpi1;Hdgf;Hnrnpab;Hnrnpd;Hsp90aa1;Hspa8;Id1;Junb;Kars;Lars2;Mif;Morf4l1;Myc;Naca;Nme2;Nono;Odc1;Pa…
Module6_esc	ribosome_biogenesis	5.42346e-15	4.08115e-13	14143	148	428	28	6.25164	Ebna1bp2;Fbl;Nop56;Npm1;Rpl11;Rpl14;Rpl24;Rpl26;Rpl35a;Rpl7;Rplp0;Rps14;Rps15;Rps16;Rps17;Rps18;Rps19;Rps2;Rps21;Rps24;Rps25;Rps28;Rps6;Rps7;Rps8;Rpsa;mt-Rnr1;mt-Rnr2
Module6_esc	ribonucleoprotein_complex_biogenesis	3.11343e-13	2.20504e-11	14143	199	428	30	4.98157	Ddx39b;Ebna1bp2;Eif3d;Fbl;Nop56;Npm1;Rpl11;Rpl14;Rpl24;Rpl26;Rpl35a;Rpl7;Rplp0;Rps14;Rps15;Rps16;Rps17;Rps18;Rps19;Rps2;Rps21;Rps24;Rps25;Rps28;Rps6;Rps7;Rps8;Rpsa;mt-Rnr1;mt-Rnr2
Module6_esc	macromolecule_biosynthetic_process	5.68946e-13	3.80562e-11	14143	2067	428	119	1.90241	Anp32a;Apoe;Atf4;Btf3;Bzw1;Cnbp;Csda;Ctnnb1;Ddx5;Dynll1;Edf1;Eef1a1;Eef1b2;Eef1d;Eef1g;Eef2;Eif1;Eif2s2;Eif3c;Eif3d;Eif3e;Eif3h;Eif3i;Eif3k;Eif3l;Eif3m;Eif4a1;Eif4a2;Eif4b;Eif4g1;Eif4g2;Eif5a;Ewsr1;Gars;Hdgf;Hnrnpab;Hnrnpd;Hspa8;Id1;Junb;Kars;Lars2;Morf4l1;Myc;Naca;Nono;Pcna;Phb2;Polr2f;Pou5f1;Rbbp4;Rbbp7;Rbm3;Rpl10;Rpl11;Rpl13;Rpl14;Rpl15;Rpl18;Rpl18a;Rpl19;Rpl22;Rpl22l1;Rpl23;Rpl24;Rpl26;Rpl28;…
Module6_esc	cellular_macromolecule_biosynthetic_process	6.57863e-13	4.16877e-11	14143	2046	428	118	1.90579	Anp32a;Apoe;Atf4;Btf3;Bzw1;Cnbp;Csda;Ctnnb1;Ddx5;Dynll1;Edf1;Eef1a1;Eef1b2;Eef1d;Eef1g;Eef2;Eif1;Eif2s2;Eif3c;Eif3d;Eif3e;Eif3h;Eif3i;Eif3k;Eif3l;Eif3m;Eif4a1;Eif4a2;Eif4b;Eif4g1;Eif4g2;Eif5a;Ewsr1;Gars;Hdgf;Hnrnpab;Hnrnpd;Hspa8;Id1;Junb;Kars;Lars2;Morf4l1;Myc;Naca;Nono;Pcna;Phb2;Polr2f;Pou5f1;Rbbp4;Rbbp7;Rbm3;Rpl10;Rpl11;Rpl13;Rpl14;Rpl15;Rpl18;Rpl18a;Rpl19;Rpl22;Rpl22l1;Rpl23;Rpl24;Rpl26;Rpl28;…
Module6_esc	ATP_biosynthetic_process	9.05111e-13	5.44877e-11	14143	36	428	14	12.8506	Aldoa;Atp1a1;Atp5a1;Atp5b;Atp5c1;Atp5d;Atp5e;Atp5f1;Atp5g3;Atp5h;Atp5l;Atp5o;mt-Atp6;mt-Atp8
Module6_esc	purine_ribonucleoside_triphosphate_biosynthetic_process	1.32071e-12	7.57206e-11	14143	44	428	15	11.2651	Aldoa;Atp1a1;Atp5a1;Atp5b;Atp5c1;Atp5d;Atp5e;Atp5f1;Atp5g3;Atp5h;Atp5l;Atp5o;Nme2;mt-Atp6;mt-Atp8
Module6_esc	cellular_component_biogenesis_at_cellular_level	1.6789e-12	9.18816e-11	14143	212	428	30	4.67609	Ddx39b;Ebna1bp2;Eif3d;Fbl;Nop56;Npm1;Rpl11;Rpl14;Rpl24;Rpl26;Rpl35a;Rpl7;Rplp0;Rps14;Rps15;Rps16;Rps17;Rps18;Rps19;Rps2;Rps21;Rps24;Rps25;Rps28;Rps6;Rps7;Rps8;Rpsa;mt-Rnr1;mt-Rnr2
Module6_esc	purine_nucleoside_triphosphate_biosynthetic_process	1.92685e-12	1.00866e-10	14143	45	428	15	11.0148	Aldoa;Atp1a1;Atp5a1;Atp5b;Atp5c1;Atp5d;Atp5e;Atp5f1;Atp5g3;Atp5h;Atp5l;Atp5o;Nme2;mt-Atp6;mt-Atp8
Module6_esc	purine_ribonucleoside_triphosphate_metabolic_process	2.19668e-12	1.102e-10	14143	273	428	34	4.11542	Aldoa;Atp1a1;Atp5a1;Atp5b;Atp5c1;Atp5d;Atp5e;Atp5f1;Atp5g3;Atp5h;Atp5l;Atp5o;Cdc42;Ddx3x;Ddx5;Eef2;Gnai2;Gnas;Gnb1;Gnb2;Hsp90aa1;Hspa8;Nme2;Rab7;Ran;Ruvbl2;Tuba1a;Tuba1b;Tuba1c;Tubb4b;Tubb5;Vcp;mt-Atp6;mt-Atp8
Module6_esc	nucleoside_triphosphate_metabolic_process	2.58367e-12	1.2443e-10	14143	290	428	35	3.98812	Aldoa;Atp1a1;Atp5a1;Atp5b;Atp5c1;Atp5d;Atp5e;Atp5f1;Atp5g3;Atp5h;Atp5l;Atp5o;Cdc42;Dctpp1;Ddx3x;Ddx5;Eef2;Gnai2;Gnas;Gnb1;Gnb2;Hsp90aa1;Hspa8;Nme2;Rab7;Ran;Ruvbl2;Tuba1a;Tuba1b;Tuba1c;Tubb4b;Tubb5;Vcp;mt-Atp6;mt-Atp8
Module6_esc	ribonucleoside_triphosphate_biosynthetic_process	2.78095e-12	1.28779e-10	14143	46	428	15	10.7753	Aldoa;Atp1a1;Atp5a1;Atp5b;Atp5c1;Atp5d;Atp5e;Atp5f1;Atp5g3;Atp5h;Atp5l;Atp5o;Nme2;mt-Atp6;mt-Atp8
Module6_esc	ribonucleoside_triphosphate_metabolic_process	3.00279e-12	1.33902e-10	14143	276	428	34	4.07069	Aldoa;Atp1a1;Atp5a1;Atp5b;Atp5c1;Atp5d;Atp5e;Atp5f1;Atp5g3;Atp5h;Atp5l;Atp5o;Cdc42;Ddx3x;Ddx5;Eef2;Gnai2;Gnas;Gnb1;Gnb2;Hsp90aa1;Hspa8;Nme2;Rab7;Ran;Ruvbl2;Tuba1a;Tuba1b;Tuba1c;Tubb4b;Tubb5;Vcp;mt-Atp6;mt-Atp8
Module6_esc	purine_nucleoside_triphosphate_metabolic_process	4.5233e-12	1.94502e-10	14143	280	428	34	4.01253	Aldoa;Atp1a1;Atp5a1;Atp5b;Atp5c1;Atp5d;Atp5e;Atp5f1;Atp5g3;Atp5h;Atp5l;Atp5o;Cdc42;Ddx3x;Ddx5;Eef2;Gnai2;Gnas;Gnb1;Gnb2;Hsp90aa1;Hspa8;Nme2;Rab7;Ran;Ruvbl2;Tuba1a;Tuba1b;Tuba1c;Tubb4b;Tubb5;Vcp;mt-Atp6;mt-Atp8
Module6_esc	purine_ribonucleotide_metabolic_process	4.68596e-12	1.94548e-10	14143	296	428	35	3.90728	Aldoa;Atp1a1;Atp5a1;Atp5b;Atp5c1;Atp5d;Atp5e;Atp5f1;Atp5g3;Atp5h;Atp5l;Atp5o;Cdc42;Ddx3x;Ddx5;Eef2;Gnai2;Gnas;Gnb1;Gnb2;Hsp90aa1;Hspa8;Nme2;Paics;Rab7;Ran;Ruvbl2;Tuba1a;Tuba1b;Tuba1c;Tubb4b;Tubb5;Vcp;mt-Atp6;mt-Atp8
Module6_esc	translational_initiation	5.14405e-12	2.06448e-10	14143	56	428	16	9.44126	Eif1;Eif2s2;Eif3c;Eif3d;Eif3e;Eif3h;Eif3i;Eif3k;Eif3l;Eif3m;Eif4a1;Eif4a2;Eif4b;Eif4g1;Eif4g2;Rps2
Module6_esc	ribosomal_small_subunit_assembly	5.78251e-12	2.24585e-10	14143	9	428	8	29.3728	Rps14;Rps15;Rps17;Rps2;Rps25;Rps6;Rpsa;mt-Rnr1
Module6_esc	proton_transport	6.95548e-12	2.617e-10	14143	57	428	16	9.27562	Atp5a1;Atp5b;Atp5c1;Atp5d;Atp5e;Atp5f1;Atp5g3;Atp5h;Atp5l;Atp5o;Cox6c;Cox7c;Uqcr11;mt-Atp6;mt-Atp8;mt-Co1
Module6_esc	nucleoside_triphosphate_biosynthetic_process	7.87842e-12	2.87443e-10	14143	49	428	15	10.1156	Aldoa;Atp1a1;Atp5a1;Atp5b;Atp5c1;Atp5d;Atp5e;Atp5f1;Atp5g3;Atp5h;Atp5l;Atp5o;Nme2;mt-Atp6;mt-Atp8
Module6_esc	hydrogen_transport	9.34195e-12	3.30815e-10	14143	58	428	16	9.11569	Atp5a1;Atp5b;Atp5c1;Atp5d;Atp5e;Atp5f1;Atp5g3;Atp5h;Atp5l;Atp5o;Cox6c;Cox7c;Uqcr11;mt-Atp6;mt-Atp8;mt-Co1
Module6_esc	ribonucleotide_metabolic_process	1.4689e-11	5.05301e-10	14143	308	428	35	3.75504	Aldoa;Atp1a1;Atp5a1;Atp5b;Atp5c1;Atp5d;Atp5e;Atp5f1;Atp5g3;Atp5h;Atp5l;Atp5o;Cdc42;Ddx3x;Ddx5;Eef2;Gnai2;Gnas;Gnb1;Gnb2;Hsp90aa1;Hspa8;Nme2;Paics;Rab7;Ran;Ruvbl2;Tuba1a;Tuba1b;Tuba1c;Tubb4b;Tubb5;Vcp;mt-Atp6;mt-Atp8
Module6_esc	ribosome_assembly	2.04559e-11	6.84137e-10	14143	18	428	10	18.358	Rpl24;Rps14;Rps15;Rps17;Rps2;Rps25;Rps6;Rpsa;mt-Rnr1;mt-Rnr2
Module6_esc	RNA_processing	4.27353e-11	1.39063e-09	14143	478	428	44	3.04174	Ddx39b;Ddx5;Ebna1bp2;Fbl;Hnrnpa1;Hnrnpa2b1;Hnrnpa3;Hnrnpf;Hnrnph1;Hnrnpk;Hnrnpl;Hnrnpm;Hnrnpu;Nono;Pabpc1;Pcbp1;Rbm3;Rpl11;Rpl14;Rpl26;Rpl35a;Rpl7;Rps15;Rps16;Rps17;Rps19;Rps21;Rps24;Rps28;Rps6;Rps7;Rps8;Rpsa;Sf3b5;Sfpq;Snrnp70;Snrpb;Snrpd2;Snrpd3;Snrpe;Snrpg;U2af1;U2af2;Ybx1
Module6_esc	nucleoside_triphosphate_catabolic_process	5.65933e-11	1.79311e-09	14143	243	428	30	4.07955	Atp1a1;Atp5a1;Atp5b;Atp5c1;Atp5d;Atp5e;Atp5f1;Atp5h;Atp5l;Atp5o;Cdc42;Dctpp1;Ddx3x;Ddx5;Eef2;Gnai2;Gnas;Gnb1;Gnb2;Hsp90aa1;Hspa8;Rab7;Ran;Ruvbl2;Tuba1a;Tuba1b;Tuba1c;Tubb4b;Tubb5;Vcp
Module6_esc	purine_ribonucleotide_biosynthetic_process	8.00232e-11	2.47046e-09	14143	66	428	16	8.01076	Aldoa;Atp1a1;Atp5a1;Atp5b;Atp5c1;Atp5d;Atp5e;Atp5f1;Atp5g3;Atp5h;Atp5l;Atp5o;Nme2;Paics;mt-Atp6;mt-Atp8
Module6_esc	purine-containing_compound_metabolic_process	8.97403e-11	2.70118e-09	14143	380	428	38	3.30444	Aldoa;Aprt;Atp1a1;Atp5a1;Atp5b;Atp5c1;Atp5d;Atp5e;Atp5f1;Atp5g3;Atp5h;Atp5l;Atp5o;Cdc42;Ddx3x;Ddx5;Eef2;Gars;Gnai2;Gnas;Gnb1;Gnb2;Hsp90aa1;Hspa8;Kars;Nme2;Paics;Rab7;Ran;Ruvbl2;Tuba1a;Tuba1b;Tuba1c;Tubb4b;Tubb5;Vcp;mt-Atp6;mt-Atp8
Module6_esc	purine_ribonucleoside_triphosphate_catabolic_process	1.08794e-10	3.19484e-09	14143	234	428	29	4.09525	Atp1a1;Atp5a1;Atp5b;Atp5c1;Atp5d;Atp5e;Atp5f1;Atp5h;Atp5l;Atp5o;Cdc42;Ddx3x;Ddx5;Eef2;Gnai2;Gnas;Gnb1;Gnb2;Hsp90aa1;Hspa8;Rab7;Ran;Ruvbl2;Tuba1a;Tuba1b;Tuba1c;Tubb4b;Tubb5;Vcp
Module6_esc	ribonucleoside_triphosphate_catabolic_process	1.20698e-10	3.46e-09	14143	235	428	29	4.07782	Atp1a1;Atp5a1;Atp5b;Atp5c1;Atp5d;Atp5e;Atp5f1;Atp5h;Atp5l;Atp5o;Cdc42;Ddx3x;Ddx5;Eef2;Gnai2;Gnas;Gnb1;Gnb2;Hsp90aa1;Hspa8;Rab7;Ran;Ruvbl2;Tuba1a;Tuba1b;Tuba1c;Tubb4b;Tubb5;Vcp
Module6_esc	protein_folding	1.37473e-10	3.84924e-09	14143	137	428	22	5.3064	Calr;Cct2;Cct3;Cct4;Cct5;Cct6a;Cct7;Cct8;Dnaja1;Fkbp1a;Fkbp3;Fkbp4;Hsp90aa1;Hsp90ab1;Hsp90b1;Hspa8;Hspa9;Hspd1;Hspe1;Ppib;Sep15;Tcp1
Module6_esc	purine_nucleoside_triphosphate_catabolic_process	1.64221e-10	4.49368e-09	14143	238	428	29	4.02642	Atp1a1;Atp5a1;Atp5b;Atp5c1;Atp5d;Atp5e;Atp5f1;Atp5h;Atp5l;Atp5o;Cdc42;Ddx3x;Ddx5;Eef2;Gnai2;Gnas;Gnb1;Gnb2;Hsp90aa1;Hspa8;Rab7;Ran;Ruvbl2;Tuba1a;Tuba1b;Tuba1c;Tubb4b;Tubb5;Vcp
Module6_esc	purine_ribonucleotide_catabolic_process	1.81759e-10	4.73696e-09	14143	239	428	29	4.00957	Atp1a1;Atp5a1;Atp5b;Atp5c1;Atp5d;Atp5e;Atp5f1;Atp5h;Atp5l;Atp5o;Cdc42;Ddx3x;Ddx5;Eef2;Gnai2;Gnas;Gnb1;Gnb2;Hsp90aa1;Hspa8;Rab7;Ran;Ruvbl2;Tuba1a;Tuba1b;Tuba1c;Tubb4b;Tubb5;Vcp
Module6_esc	purine-containing_compound_biosynthetic_process	1.83191e-10	4.73696e-09	14143	102	428	19	6.15533	Aldoa;Aprt;Atp1a1;Atp5a1;Atp5b;Atp5c1;Atp5d;Atp5e;Atp5f1;Atp5g3;Atp5h;Atp5l;Atp5o;Gars;Kars;Nme2;Paics;mt-Atp6;mt-Atp8
Module6_esc	nucleobase-containing_small_molecule_metabolic_process	1.84914e-10	4.73696e-09	14143	500	428	44	2.90791	Aldoa;Aprt;Atp1a1;Atp5a1;Atp5b;Atp5c1;Atp5d;Atp5e;Atp5f1;Atp5g3;Atp5h;Atp5l;Atp5o;Cdc42;Dctpp1;Ddx3x;Ddx5;Eef2;Gars;Gnai2;Gnas;Gnb1;Gnb2;Hsp90aa1;Hspa8;Kars;Ldha;Mdh2;Nme2;Paics;Rab7;Ran;Rrm2;Ruvbl2;Taldo1;Tpi1;Tuba1a;Tuba1b;Tuba1c;Tubb4b;Tubb5;Vcp;mt-Atp6;mt-Atp8
Module6_esc	oxidation-reduction_process	2.308e-10	5.78923e-09	14143	682	428	53	2.56797	Adh5;Akr1a1;Aldh2;Bax;Cox4i1;Cox5a;Cox6a1;Cox6b1;Cox6c;Cox7c;Cox8a;Etfb;Fth1;Gapdh;Glrx3;Gnas;Gpx1;Gpx4;Ldha;Mdh2;Ndufa4;Ndufa7;P4hb;Park7;Pdia3;Phgdh;Ppp1ca;Prdx1;Prdx2;Rrm2;Sep15;Sod1;Taldo1;Tpi1;Txn1;Uqcr10;Uqcr11;Uqcrh;Vat1;Ywhae;Ywhaq;mt-Atp8;mt-Co1;mt-Co2;mt-Co3;mt-Cytb;mt-Nd1;mt-Nd2;mt-Nd3;mt-Nd4;mt-Nd4l;mt-Nd5;mt-Nd6
Module6_esc	cellular_component_biogenesis	2.6457e-10	6.40251e-09	14143	1076	428	71	2.18044	Actg1;Actn4;Apoe;Bax;Calr;Capzb;Cct2;Cdc42;Cdk1;Cth;Ctnnb1;Dctpp1;Ddx39b;Ebna1bp2;Eif3d;Fbl;Fkbp1a;Fkbp4;Flna;Fn1;Fscn1;H2afz;Hmga1;Hsp90aa1;Hsp90b1;Itgb1;Krt8;Mif;Nap1l1;Nme2;Nop56;Npm1;Pomp;Rbbp4;Rpl11;Rpl14;Rpl24;Rpl26;Rpl35a;Rpl7;Rplp0;Rps14;Rps15;Rps16;Rps17;Rps18;Rps19;Rps2;Rps21;Rps24;Rps25;Rps28;Rps6;Rps7;Rps8;Rpsa;Rrm2;Set;Tpm1;Trim28;Tuba1a;Tuba1b;Tuba1c;Tubb4b;Tubb5;Ube2s;Uqcrb;Uqcrh;V…
Module6_esc	nucleobase-containing_compound_metabolic_process	2.67335e-10	6.40251e-09	14143	2863	428	141	1.6274	Aldoa;Anp32a;Aprt;Atf4;Atp1a1;Atp5a1;Atp5b;Atp5c1;Atp5d;Atp5e;Atp5f1;Atp5g3;Atp5h;Atp5l;Atp5o;Banf1;Bax;Btf3;Bzw1;Cdc42;Cdk1;Cnbp;Csda;Ctnnb1;Dctpp1;Ddb1;Ddx39b;Ddx3x;Ddx5;Dynll1;Ebna1bp2;Edf1;Eef2;Eif3e;Eif4g1;Eif4g2;Ewsr1;Fbl;Gars;Gnai2;Gnas;Gnb1;Gnb2;H2afz;Hdgf;Hmga1;Hmgb1;Hmgb2;Hmgn1;Hnrnpa1;Hnrnpa2b1;Hnrnpa3;Hnrnpab;Hnrnpd;Hnrnpf;Hnrnph1;Hnrnpk;Hnrnpl;Hnrnpm;Hnrnpu;Hsp90aa1;Hspa8;Hspd1;Id1;J…
Module6_esc	ribonucleotide_catabolic_process	2.71203e-10	6.40251e-09	14143	243	428	29	3.94357	Atp1a1;Atp5a1;Atp5b;Atp5c1;Atp5d;Atp5e;Atp5f1;Atp5h;Atp5l;Atp5o;Cdc42;Ddx3x;Ddx5;Eef2;Gnai2;Gnas;Gnb1;Gnb2;Hsp90aa1;Hspa8;Rab7;Ran;Ruvbl2;Tuba1a;Tuba1b;Tuba1c;Tubb4b;Tubb5;Vcp
Module6_esc	purine_nucleotide_metabolic_process	3.21585e-10	7.44593e-09	14143	344	428	35	3.36207	Aldoa;Atp1a1;Atp5a1;Atp5b;Atp5c1;Atp5d;Atp5e;Atp5f1;Atp5g3;Atp5h;Atp5l;Atp5o;Cdc42;Ddx3x;Ddx5;Eef2;Gnai2;Gnas;Gnb1;Gnb2;Hsp90aa1;Hspa8;Nme2;Paics;Rab7;Ran;Ruvbl2;Tuba1a;Tuba1b;Tuba1c;Tubb4b;Tubb5;Vcp;mt-Atp6;mt-Atp8
Module6_esc	ribonucleotide_biosynthetic_process	5.03854e-10	1.1446e-08	14143	74	428	16	7.14473	Aldoa;Atp1a1;Atp5a1;Atp5b;Atp5c1;Atp5d;Atp5e;Atp5f1;Atp5g3;Atp5h;Atp5l;Atp5o;Nme2;Paics;mt-Atp6;mt-Atp8
Module6_esc	nucleoside_phosphate_metabolic_process	6.6682e-10	1.45973e-08	14143	463	428	41	2.92618	Aldoa;Atp1a1;Atp5a1;Atp5b;Atp5c1;Atp5d;Atp5e;Atp5f1;Atp5g3;Atp5h;Atp5l;Atp5o;Cdc42;Dctpp1;Ddx3x;Ddx5;Eef2;Gnai2;Gnas;Gnb1;Gnb2;Hsp90aa1;Hspa8;Ldha;Mdh2;Nme2;Paics;Rab7;Ran;Rrm2;Ruvbl2;Taldo1;Tpi1;Tuba1a;Tuba1b;Tuba1c;Tubb4b;Tubb5;Vcp;mt-Atp6;mt-Atp8
Module6_esc	nucleotide_metabolic_process	6.6682e-10	1.45973e-08	14143	463	428	41	2.92618	Aldoa;Atp1a1;Atp5a1;Atp5b;Atp5c1;Atp5d;Atp5e;Atp5f1;Atp5g3;Atp5h;Atp5l;Atp5o;Cdc42;Dctpp1;Ddx3x;Ddx5;Eef2;Gnai2;Gnas;Gnb1;Gnb2;Hsp90aa1;Hspa8;Ldha;Mdh2;Nme2;Paics;Rab7;Ran;Rrm2;Ruvbl2;Taldo1;Tpi1;Tuba1a;Tuba1b;Tuba1c;Tubb4b;Tubb5;Vcp;mt-Atp6;mt-Atp8
Module6_esc	cellular_nitrogen_compound_metabolic_process	7.39469e-10	1.58986e-08	14143	2988	428	144	1.5925	Aldoa;Anp32a;Aprt;Atf4;Atp1a1;Atp5a1;Atp5b;Atp5c1;Atp5d;Atp5e;Atp5f1;Atp5g3;Atp5h;Atp5l;Atp5o;Banf1;Bax;Btf3;Bzw1;Cdc42;Cdk1;Cnbp;Csda;Ctnnb1;Dctpp1;Ddb1;Ddx39b;Ddx3x;Ddx5;Dynll1;Ebna1bp2;Edf1;Eef2;Eif3e;Eif4g1;Eif4g2;Ewsr1;Fbl;Gars;Gnai2;Gnas;Gnb1;Gnb2;H2afz;Hdgf;Hmga1;Hmgb1;Hmgb2;Hmgn1;Hnrnpa1;Hnrnpa2b1;Hnrnpa3;Hnrnpab;Hnrnpd;Hnrnpf;Hnrnph1;Hnrnpk;Hnrnpl;Hnrnpm;Hnrnpu;Hsp90aa1;Hspa8;Hspd1;Id1;J…
Module6_esc	purine_nucleotide_catabolic_process	9.37842e-10	1.96826e-08	14143	256	428	29	3.74331	Atp1a1;Atp5a1;Atp5b;Atp5c1;Atp5d;Atp5e;Atp5f1;Atp5h;Atp5l;Atp5o;Cdc42;Ddx3x;Ddx5;Eef2;Gnai2;Gnas;Gnb1;Gnb2;Hsp90aa1;Hspa8;Rab7;Ran;Ruvbl2;Tuba1a;Tuba1b;Tuba1c;Tubb4b;Tubb5;Vcp
Module6_esc	cellular_catabolic_process	9.48163e-10	1.96826e-08	14143	926	428	63	2.24816	Adh5;Akr1a1;Apoe;Atp1a1;Atp5a1;Atp5b;Atp5c1;Atp5d;Atp5e;Atp5f1;Atp5h;Atp5l;Atp5o;Bax;Cdc42;Dctpp1;Ddb1;Ddx3x;Ddx5;Eef2;Eif3e;Gnai2;Gnas;Gnb1;Gnb2;Gpi1;Gpx1;Gpx4;Hsp90aa1;Hsp90b1;Hspa5;Hspa8;Lsm7;Mdh2;Myc;Nedd4;Pabpc1;Park7;Prdx1;Prdx2;Psma4;Psma6;Psma7;Psmb1;Psmb3;Psmb4;Psmb5;Psmb6;Psmb7;Rab7;Ran;Ruvbl2;Sec61b;Sod1;Tuba1a;Tuba1b;Tuba1c;Tubb4b;Tubb5;Ube2d3;Ube2i;Ube2s;Vcp
Module6_esc	rRNA_processing	1.1777e-09	2.38585e-08	14143	101	428	18	5.8891	Ebna1bp2;Fbl;Rpl11;Rpl14;Rpl26;Rpl35a;Rpl7;Rps15;Rps16;Rps17;Rps19;Rps21;Rps24;Rps28;Rps6;Rps7;Rps8;Rpsa
Module6_esc	nucleotide_catabolic_process	1.18896e-09	2.38585e-08	14143	275	428	30	3.60484	Atp1a1;Atp5a1;Atp5b;Atp5c1;Atp5d;Atp5e;Atp5f1;Atp5h;Atp5l;Atp5o;Cdc42;Dctpp1;Ddx3x;Ddx5;Eef2;Gnai2;Gnas;Gnb1;Gnb2;Hsp90aa1;Hspa8;Rab7;Ran;Ruvbl2;Tuba1a;Tuba1b;Tuba1c;Tubb4b;Tubb5;Vcp
Module6_esc	purine-containing_compound_catabolic_process	1.61531e-09	3.18825e-08	14143	262	428	29	3.65759	Atp1a1;Atp5a1;Atp5b;Atp5c1;Atp5d;Atp5e;Atp5f1;Atp5h;Atp5l;Atp5o;Cdc42;Ddx3x;Ddx5;Eef2;Gnai2;Gnas;Gnb1;Gnb2;Hsp90aa1;Hspa8;Rab7;Ran;Ruvbl2;Tuba1a;Tuba1b;Tuba1c;Tubb4b;Tubb5;Vcp
Module6_esc	ribosomal_large_subunit_biogenesis	1.68793e-09	3.27785e-08	14143	14	428	8	18.8825	Npm1;Rpl11;Rpl14;Rpl24;Rpl26;Rpl35a;Rpl7;mt-Rnr2
Module6_esc	ATP_metabolic_process	1.81447e-09	3.46765e-08	14143	129	428	20	5.12316	Aldoa;Atp1a1;Atp5a1;Atp5b;Atp5c1;Atp5d;Atp5e;Atp5f1;Atp5g3;Atp5h;Atp5l;Atp5o;Ddx3x;Ddx5;Hsp90aa1;Hspa8;Ruvbl2;Vcp;mt-Atp6;mt-Atp8
Module6_esc	rRNA_metabolic_process	1.92773e-09	3.62655e-08	14143	104	428	18	5.71922	Ebna1bp2;Fbl;Rpl11;Rpl14;Rpl26;Rpl35a;Rpl7;Rps15;Rps16;Rps17;Rps19;Rps21;Rps24;Rps28;Rps6;Rps7;Rps8;Rpsa
Module6_esc	catabolic_process	3.60109e-09	6.67032e-08	14143	1096	428	69	2.08035	Adh5;Akr1a1;Aldoa;Apoe;Atp1a1;Atp5a1;Atp5b;Atp5c1;Atp5d;Atp5e;Atp5f1;Atp5h;Atp5l;Atp5o;Bax;Cdc42;Dctpp1;Ddb1;Ddx3x;Ddx5;Eef2;Eif3e;Fkbp1a;Gnai2;Gnas;Gnb1;Gnb2;Gpi1;Gpx1;Gpx4;Hsp90aa1;Hsp90b1;Hspa5;Hspa8;Ldha;Lsm7;Mdh2;Myc;Nedd4;Pabpc1;Park7;Pgk1;Prdx1;Prdx2;Psma4;Psma6;Psma7;Psmb1;Psmb3;Psmb4;Psmb5;Psmb6;Psmb7;Rab7;Ran;Ruvbl2;Sec61b;Sod1;Taldo1;Tpi1;Tuba1a;Tuba1b;Tuba1c;Tubb4b;Tubb5;Ube2d3;Ube2i;…
Module6_esc	carbohydrate_derivative_catabolic_process	4.20397e-09	7.66906e-08	14143	290	428	30	3.41839	Atp1a1;Atp5a1;Atp5b;Atp5c1;Atp5d;Atp5e;Atp5f1;Atp5h;Atp5l;Atp5o;Cdc42;Ddx3x;Ddx5;Eef2;Fkbp1a;Gnai2;Gnas;Gnb1;Gnb2;Hsp90aa1;Hspa8;Rab7;Ran;Ruvbl2;Tuba1a;Tuba1b;Tuba1c;Tubb4b;Tubb5;Vcp
Module6_esc	nucleobase-containing_compound_catabolic_process	4.55824e-09	8.19123e-08	14143	291	428	30	3.40664	Atp1a1;Atp5a1;Atp5b;Atp5c1;Atp5d;Atp5e;Atp5f1;Atp5h;Atp5l;Atp5o;Cdc42;Dctpp1;Ddx3x;Ddx5;Eef2;Gnai2;Gnas;Gnb1;Gnb2;Hsp90aa1;Hspa8;Rab7;Ran;Ruvbl2;Tuba1a;Tuba1b;Tuba1c;Tubb4b;Tubb5;Vcp
Module6_esc	nitrogen_compound_metabolic_process	5.45615e-09	9.6606e-08	14143	3074	428	144	1.54795	Aldoa;Anp32a;Aprt;Atf4;Atp1a1;Atp5a1;Atp5b;Atp5c1;Atp5d;Atp5e;Atp5f1;Atp5g3;Atp5h;Atp5l;Atp5o;Banf1;Bax;Btf3;Bzw1;Cdc42;Cdk1;Cnbp;Csda;Ctnnb1;Dctpp1;Ddb1;Ddx39b;Ddx3x;Ddx5;Dynll1;Ebna1bp2;Edf1;Eef2;Eif3e;Eif4g1;Eif4g2;Ewsr1;Fbl;Gars;Gnai2;Gnas;Gnb1;Gnb2;H2afz;Hdgf;Hmga1;Hmgb1;Hmgb2;Hmgn1;Hnrnpa1;Hnrnpa2b1;Hnrnpa3;Hnrnpab;Hnrnpd;Hnrnpf;Hnrnph1;Hnrnpk;Hnrnpl;Hnrnpm;Hnrnpu;Hsp90aa1;Hspa8;Hspd1;Id1;J…
Module6_esc	generation_of_precursor_metabolites_and_energy	7.39358e-09	1.29013e-07	14143	214	428	25	3.86033	Aldoa;Bax;Etfb;Gnas;Gpi1;Ldha;Mdh2;Ndufa4;Ndufa7;Pgk1;Ppp1ca;Tpi1;Txn1;Uqcr10;Uqcr11;Uqcrh;mt-Co1;mt-Co2;mt-Cytb;mt-Nd1;mt-Nd2;mt-Nd3;mt-Nd4;mt-Nd5;mt-Nd6
Module6_esc	nucleobase-containing_compound_biosynthetic_process	7.79971e-09	1.34155e-07	14143	140	428	20	4.72063	Aldoa;Aprt;Atp1a1;Atp5a1;Atp5b;Atp5c1;Atp5d;Atp5e;Atp5f1;Atp5g3;Atp5h;Atp5l;Atp5o;Gars;Kars;Nme2;Paics;Rrm2;mt-Atp6;mt-Atp8
Module6_esc	heterocycle_metabolic_process	8.03921e-09	1.36327e-07	14143	544	428	43	2.61196	Aldoa;Aprt;Atp1a1;Atp5a1;Atp5b;Atp5c1;Atp5d;Atp5e;Atp5f1;Atp5g3;Atp5h;Atp5l;Atp5o;Cdc42;Ddx3x;Ddx5;Eef2;Gars;Gnai2;Gnas;Gnb1;Gnb2;Hsp90aa1;Hspa8;Kars;Ldha;Mdh2;Nme2;P4hb;Paics;Rab7;Ran;Ruvbl2;Taldo1;Tpi1;Tuba1a;Tuba1b;Tuba1c;Tubb4b;Tubb5;Vcp;mt-Atp6;mt-Atp8
Module6_esc	translational_elongation	8.61389e-09	1.44043e-07	14143	56	428	13	7.67102	Eef1a1;Eef1b2;Eef1d;Eef1g;Eef2;Eif5a;Rplp0;Rplp1;Rplp2;Rps17;Rps21;Rps24;Rps8
Module6_esc	cellular_macromolecular_complex_assembly	9.55556e-09	1.57601e-07	14143	266	428	28	3.47836	Calr;Cct2;Ddx39b;Eif3d;Fkbp1a;Fkbp4;H2afz;Hsp90aa1;Nap1l1;Npm1;Pomp;Rpl24;Rps14;Rps15;Rps17;Rps2;Rps25;Rps6;Rpsa;Set;Tuba1a;Tuba1b;Tuba1c;Tubb4b;Tubb5;Ube2s;mt-Rnr1;mt-Rnr2
Module6_esc	cellular_nitrogen_compound_catabolic_process	1.16801e-08	1.90038e-07	14143	303	428	30	3.27172	Atp1a1;Atp5a1;Atp5b;Atp5c1;Atp5d;Atp5e;Atp5f1;Atp5h;Atp5l;Atp5o;Cdc42;Dctpp1;Ddx3x;Ddx5;Eef2;Gnai2;Gnas;Gnb1;Gnb2;Hsp90aa1;Hspa8;Rab7;Ran;Ruvbl2;Tuba1a;Tuba1b;Tuba1c;Tubb4b;Tubb5;Vcp
Module6_esc	heterocycle_catabolic_process	1.92473e-08	3.08589e-07	14143	292	428	29	3.28181	Atp1a1;Atp5a1;Atp5b;Atp5c1;Atp5d;Atp5e;Atp5f1;Atp5h;Atp5l;Atp5o;Cdc42;Ddx3x;Ddx5;Eef2;Gnai2;Gnas;Gnb1;Gnb2;Hsp90aa1;Hspa8;Rab7;Ran;Ruvbl2;Tuba1a;Tuba1b;Tuba1c;Tubb4b;Tubb5;Vcp
Module6_esc	purine_nucleotide_biosynthetic_process	1.97353e-08	3.08589e-07	14143	94	428	16	5.62458	Aldoa;Atp1a1;Atp5a1;Atp5b;Atp5c1;Atp5d;Atp5e;Atp5f1;Atp5g3;Atp5h;Atp5l;Atp5o;Nme2;Paics;mt-Atp6;mt-Atp8
Module6_esc	cellular_macromolecular_complex_subunit_organization	1.97354e-08	3.08589e-07	14143	310	428	30	3.19784	Calr;Cct2;Ddx39b;Eif3d;Fkbp1a;Fkbp4;H2afz;Hsp90aa1;Nap1l1;Npm1;Pomp;Rpl24;Rps14;Rps15;Rps17;Rps2;Rps25;Rps6;Rpsa;Set;Sgk1;Stmn1;Tuba1a;Tuba1b;Tuba1c;Tubb4b;Tubb5;Ube2s;mt-Rnr1;mt-Rnr2
Module6_esc	negative_regulation_of_cell_death	2.07623e-08	3.20485e-07	14143	521	428	41	2.60042	Apoe;Asns;Bax;Cacybp;Cdk1;Csda;Cst3;Cth;Ctnnb1;Cyr61;Eif5a;Fn1;Fth1;Gpi1;Gpx1;Gstp1;Hsp90ab1;Hsp90b1;Hspa5;Hspb1;Hspd1;Krt18;Mif;Mt1;Myc;Nme2;Park7;Prdx2;Ptma;Rps6;Serpine1;Set;Sgk1;Slc25a4;Slc2a3;Sod1;Spp1;Thbs1;Timp1;Tpt1;Ybx1
Module6_esc	ATP_catabolic_process	3.64791e-08	5.5596e-07	14143	98	428	16	5.395	Atp1a1;Atp5a1;Atp5b;Atp5c1;Atp5d;Atp5e;Atp5f1;Atp5h;Atp5l;Atp5o;Ddx3x;Ddx5;Hsp90aa1;Hspa8;Ruvbl2;Vcp
Module6_esc	electron_transport_chain	1.48473e-07	2.23452e-06	14143	108	428	16	4.89547	Etfb;Ndufa4;Ndufa7;Txn1;Uqcr10;Uqcr11;Uqcrh;mt-Co1;mt-Co2;mt-Cytb;mt-Nd1;mt-Nd2;mt-Nd3;mt-Nd4;mt-Nd5;mt-Nd6
Module6_esc	RNA_splicing	1.52912e-07	2.27291e-06	14143	215	428	23	3.53498	Ddx39b;Ddx5;Hnrnpa1;Hnrnpa2b1;Hnrnpa3;Hnrnpf;Hnrnph1;Hnrnpk;Hnrnpm;Hnrnpu;Nono;Pabpc1;Sf3b5;Sfpq;Snrnp70;Snrpb;Snrpd2;Snrpd3;Snrpe;Snrpg;U2af1;U2af2;Ybx1
Module6_esc	carbohydrate_derivative_metabolic_process	1.67364e-07	2.4574e-06	14143	562	428	41	2.41071	Aldoa;Aprt;Atp1a1;Atp5a1;Atp5b;Atp5c1;Atp5d;Atp5e;Atp5f1;Atp5h;Atp5l;Atp5o;Bax;Cdc42;Ddx3x;Ddx5;Eef2;Fkbp1a;Gars;Gnai2;Gnas;Gnb1;Gnb2;Gpi1;Hsp90aa1;Hspa8;Kars;Nme2;Rab7;Ran;Rpn2;Rrm2;Ruvbl2;Taldo1;Tpi1;Tuba1a;Tuba1b;Tuba1c;Tubb4b;Tubb5;Vcp
Module6_esc	cellular_nitrogen_compound_biosynthetic_process	1.96818e-07	2.85505e-06	14143	218	428	23	3.48633	Aldoa;Aprt;Atp1a1;Atp5a1;Atp5b;Atp5c1;Atp5d;Atp5e;Atp5f1;Atp5g3;Atp5h;Atp5l;Atp5o;Gars;Hsp90aa1;Kars;Nme2;Odc1;Paics;Rrm2;Srm;mt-Atp6;mt-Atp8
Module6_esc	negative_regulation_of_apoptotic_process	3.12787e-07	4.48329e-06	14143	491	428	37	2.49011	Apoe;Asns;Bax;Cdk1;Csda;Cth;Ctnnb1;Cyr61;Eif5a;Fn1;Gpi1;Gpx1;Gstp1;Hsp90ab1;Hsp90b1;Hspa5;Hspb1;Hspd1;Krt18;Mif;Mt1;Myc;Nme2;Park7;Prdx2;Ptma;Rps6;Serpine1;Set;Sgk1;Slc2a3;Sod1;Spp1;Thbs1;Timp1;Tpt1;Ybx1
Module6_esc	negative_regulation_of_programmed_cell_death	3.8213e-07	5.41276e-06	14143	495	428	37	2.46998	Apoe;Asns;Bax;Cdk1;Csda;Cth;Ctnnb1;Cyr61;Eif5a;Fn1;Gpi1;Gpx1;Gstp1;Hsp90ab1;Hsp90b1;Hspa5;Hspb1;Hspd1;Krt18;Mif;Mt1;Myc;Nme2;Park7;Prdx2;Ptma;Rps6;Serpine1;Set;Sgk1;Slc2a3;Sod1;Spp1;Thbs1;Timp1;Tpt1;Ybx1
Module6_esc	cellular_component_assembly_at_cellular_level	3.97925e-07	5.57094e-06	14143	624	428	43	2.2771	Actg1;Actn4;Calr;Capzb;Cct2;Cdc42;Ctnnb1;Ddx39b;Eif3d;Fkbp1a;Fkbp4;Flna;Fn1;Fscn1;H2afz;Hmga1;Hsp90aa1;Hsp90b1;Itgb1;Krt8;Nap1l1;Npm1;Pomp;Rbbp4;Rpl24;Rps14;Rps15;Rps17;Rps2;Rps25;Rps6;Rpsa;Set;Tpm1;Tuba1a;Tuba1b;Tuba1c;Tubb4b;Tubb5;Ube2s;Vcp;mt-Rnr1;mt-Rnr2
Module6_esc	nucleotide_biosynthetic_process	4.30649e-07	5.95978e-06	14143	131	428	17	4.2882	Aldoa;Atp1a1;Atp5a1;Atp5b;Atp5c1;Atp5d;Atp5e;Atp5f1;Atp5g3;Atp5h;Atp5l;Atp5o;Nme2;Paics;Rrm2;mt-Atp6;mt-Atp8
Module6_esc	negative_regulation_of_protein_complex_assembly	5.07934e-07	6.94946e-06	14143	54	428	11	6.73127	Capzb;Cdc42;Eif4ebp1;Fkbp4;Pfn1;Sgk1;Stmn1;Stmn2;Tmsb10;Tmsb4x;Tpm1
Module6_esc	organic_substance_metabolic_process	6.61851e-07	8.95358e-06	14143	592	428	41	2.28855	Aldoa;Aprt;Atp1a1;Atp5a1;Atp5b;Atp5c1;Atp5d;Atp5e;Atp5f1;Atp5h;Atp5l;Atp5o;Bax;Cdc42;Ddx3x;Ddx5;Eef2;Fkbp1a;Gars;Gnai2;Gnas;Gnb1;Gnb2;Gpi1;Hsp90aa1;Hspa8;Kars;Nme2;Rab7;Ran;Rpn2;Rrm2;Ruvbl2;Taldo1;Tpi1;Tuba1a;Tuba1b;Tuba1c;Tubb4b;Tubb5;Vcp
Module6_esc	regulation_of_cell_death	6.71881e-07	8.98827e-06	14143	959	428	57	1.96406	Actn4;Apoe;Asns;Atpif1;Bax;Cacybp;Cdc42;Cdk1;Csda;Cst3;Ctgf;Cth;Ctnnb1;Cyr61;Ddx5;Eif5a;Fn1;Fth1;Gnb2l1;Gpi1;Gpx1;Gstp1;Hmgb1;Hsp90ab1;Hsp90b1;Hspa5;Hspb1;Hspd1;Itgb1;Itm2b;Krt18;Ldha;Mif;Mt1;Myc;Ngfrap1;Nme2;Park7;Pdia3;Prdx1;Prdx2;Ptma;Rps27l;Rps3;Rps3a;Rps6;Serpine1;Set;Sgk1;Slc25a4;Slc2a3;Sod1;Spp1;Thbs1;Timp1;Tpt1;Ybx1
Module6_esc	posttranscriptional_regulation_of_gene_expression	1.06258e-06	1.40587e-05	14143	276	428	25	2.99315	Calr;Cdc42;Eif3k;Eif4ebp1;Eif4g1;Eif4g2;Eif5a;Flna;Gnb2l1;Hnrnpa0;Hnrnpd;Hnrnpu;Hspd1;Id1;Npm1;Park7;Pcbp1;Ppp1ca;Rbm3;Rps14;Rps27l;Rps4x;Rps5;Thbs1;Ybx1
Module6_esc	ribonucleoprotein_complex_assembly	1.09767e-06	1.43006e-05	14143	70	428	12	5.66475	Ddx39b;Eif3d;Rpl24;Rps14;Rps15;Rps17;Rps2;Rps25;Rps6;Rpsa;mt-Rnr1;mt-Rnr2
Module6_esc	macromolecular_complex_assembly	1.11037e-06	1.43006e-05	14143	604	428	41	2.24308	Apoe;Bax;Calr;Cct2;Cdk1;Cth;Ctnnb1;Dctpp1;Ddx39b;Eif3d;Fkbp1a;Fkbp4;H2afz;Hsp90aa1;Mif;Nap1l1;Nme2;Npm1;Pomp;Rpl24;Rps14;Rps15;Rps17;Rps2;Rps25;Rps6;Rpsa;Rrm2;Set;Trim28;Tuba1a;Tuba1b;Tuba1c;Tubb4b;Tubb5;Ube2s;Uqcrb;Uqcrh;Vcp;mt-Rnr1;mt-Rnr2
Module6_esc	anti-apoptosis	1.11649e-06	1.43006e-05	14143	140	428	17	4.01253	Apoe;Bax;Cdk1;Cth;Fn1;Gpx1;Gstp1;Hsp90b1;Hspa5;Hspd1;Mt1;Myc;Prdx2;Ptma;Sod1;Spp1;Tpt1
Module6_esc	negative_regulation_of_protein_polymerization	1.14669e-06	1.45328e-05	14143	37	428	9	8.03783	Capzb;Fkbp4;Pfn1;Sgk1;Stmn1;Stmn2;Tmsb10;Tmsb4x;Tpm1
Module6_esc	ADP_biosynthetic_process	1.2881e-06	1.61549e-05	14143	8	428	5	20.6527	Atp5a1;Atp5b;Atp5c1;Atp5d;Atp5e
Module6_esc	macromolecular_complex_subunit_organization	1.45135e-06	1.80147e-05	14143	655	428	43	2.16933	Apoe;Bax;Calr;Cct2;Cdk1;Cth;Ctnnb1;Dctpp1;Ddx39b;Eif3d;Fkbp1a;Fkbp4;H2afz;Hsp90aa1;Mif;Nap1l1;Nme2;Npm1;Pomp;Rpl24;Rps14;Rps15;Rps17;Rps2;Rps25;Rps6;Rpsa;Rrm2;Set;Sgk1;Stmn1;Trim28;Tuba1a;Tuba1b;Tuba1c;Tubb4b;Tubb5;Ube2s;Uqcrb;Uqcrh;Vcp;mt-Rnr1;mt-Rnr2
Module6_esc	mRNA_processing	1.47778e-06	1.80339e-05	14143	281	428	25	2.93989	Ddx39b;Ddx5;Hnrnpa1;Hnrnpa2b1;Hnrnpa3;Hnrnpf;Hnrnph1;Hnrnpk;Hnrnpl;Hnrnpm;Hnrnpu;Nono;Pabpc1;Pcbp1;Sf3b5;Sfpq;Snrnp70;Snrpb;Snrpd2;Snrpd3;Snrpe;Snrpg;U2af1;U2af2;Ybx1
Module6_esc	heterocycle_biosynthetic_process	1.48285e-06	1.80339e-05	14143	175	428	19	3.58768	Aldoa;Aprt;Atp1a1;Atp5a1;Atp5b;Atp5c1;Atp5d;Atp5e;Atp5f1;Atp5g3;Atp5h;Atp5l;Atp5o;Gars;Kars;Nme2;Paics;mt-Atp6;mt-Atp8
Module6_esc	ribonucleoprotein_complex_subunit_organization	2.02945e-06	2.44346e-05	14143	74	428	12	5.35855	Ddx39b;Eif3d;Rpl24;Rps14;Rps15;Rps17;Rps2;Rps25;Rps6;Rpsa;mt-Rnr1;mt-Rnr2
Module6_esc	negative_regulation_of_biological_process	2.172e-06	2.58919e-05	14143	2340	428	108	1.52513	Actn4;Anxa2;Apoe;Asns;Atf4;Atp1a1;Atp5a1;Atp5b;Atpif1;Bax;Bex1;Cacybp;Calr;Capzb;Cd63;Cdc42;Cdk1;Cnn2;Csda;Cst3;Cth;Ctnnb1;Cyr61;Ddx5;Dynll1;Eif4ebp1;Eif5a;Eno1;Fkbp1a;Fkbp4;Flna;Fn1;Fth1;Glrx3;Gnai2;Gnas;Gnb2l1;Gpi1;Gpx1;Gstp1;Hmga1;Hmgb1;Hmgb2;Hnrnpa2b1;Hnrnpab;Hsp90ab1;Hsp90b1;Hspa5;Hspa8;Hspb1;Hspd1;Id1;Ifitm3;Itgb1;Itm2b;Krt18;Lgals1;Mid1;Mif;Mt1;Myc;Nedd4;Nme2;Npm1;Pabpc1;Park7;Pcna;Pebp1;P…
Module6_esc	mRNA_metabolic_process	2.24388e-06	2.64866e-05	14143	326	428	27	2.73681	Ddx39b;Ddx5;Eif3e;Hnrnpa1;Hnrnpa2b1;Hnrnpa3;Hnrnpf;Hnrnph1;Hnrnpk;Hnrnpl;Hnrnpm;Hnrnpu;Lsm7;Nono;Pabpc1;Pcbp1;Sf3b5;Sfpq;Snrnp70;Snrpb;Snrpd2;Snrpd3;Snrpe;Snrpg;U2af1;U2af2;Ybx1
Module6_esc	purine_nucleoside_diphosphate_biosynthetic_process	2.82611e-06	3.27177e-05	14143	9	428	5	18.358	Atp5a1;Atp5b;Atp5c1;Atp5d;Atp5e
Module6_esc	purine_ribonucleoside_diphosphate_biosynthetic_process	2.82611e-06	3.27177e-05	14143	9	428	5	18.358	Atp5a1;Atp5b;Atp5c1;Atp5d;Atp5e
Module6_esc	small_molecule_metabolic_process	3.41518e-06	3.91608e-05	14143	1159	428	63	1.7962	Adh5;Akr1a1;Aldoa;Apoe;Aprt;Asns;Atp1a1;Atp5a1;Atp5b;Atp5c1;Atp5d;Atp5e;Atp5f1;Atp5g3;Atp5h;Atp5l;Atp5o;Cdc42;Cth;Dctpp1;Ddx3x;Ddx5;Eef2;Eif5a;Gars;Gnai2;Gnas;Gnb1;Gnb2;Gpx1;Gpx4;Gsta4;Gstp1;Hsp90aa1;Hspa8;Kars;Lars2;Ldha;Mdh2;Mif;Nme2;P4hb;Paics;Pdia3;Phgdh;Psat1;Rab7;Ran;Rrm2;Ruvbl2;Sars;Sod1;Taldo1;Tpi1;Tuba1a;Tuba1b;Tuba1c;Tubb4b;Tubb5;Txn1;Vcp;mt-Atp6;mt-Atp8
Module6_esc	ncRNA_metabolic_process	3.63566e-06	4.12956e-05	14143	239	428	22	3.04174	Ebna1bp2;Fbl;Gars;Kars;Lars2;Rpl11;Rpl14;Rpl26;Rpl35a;Rpl7;Rps15;Rps16;Rps17;Rps19;Rps21;Rps24;Rps28;Rps6;Rps7;Rps8;Rpsa;Sars
Module6_esc	cellular_component_assembly	3.7994e-06	4.27521e-05	14143	940	428	54	1.89829	Actg1;Actn4;Apoe;Bax;Calr;Capzb;Cct2;Cdc42;Cdk1;Cth;Ctnnb1;Dctpp1;Ddx39b;Eif3d;Fkbp1a;Fkbp4;Flna;Fn1;Fscn1;H2afz;Hmga1;Hsp90aa1;Hsp90b1;Itgb1;Krt8;Mif;Nap1l1;Nme2;Npm1;Pomp;Rbbp4;Rpl24;Rps14;Rps15;Rps17;Rps2;Rps25;Rps6;Rpsa;Rrm2;Set;Tpm1;Trim28;Tuba1a;Tuba1b;Tuba1c;Tubb4b;Tubb5;Ube2s;Uqcrb;Uqcrh;Vcp;mt-Rnr1;mt-Rnr2
Module6_esc	reactive_oxygen_species_metabolic_process	4.2128e-06	4.69649e-05	14143	54	428	10	6.11933	Atpif1;Ctgf;Cyr61;Gpx1;Gpx4;Park7;Prdx1;Prdx2;Sod1;mt-Nd2
Module6_esc	negative_regulation_of_cellular_process	4.69526e-06	5.18632e-05	14143	2155	428	100	1.53338	Actn4;Apoe;Asns;Atp1a1;Atp5a1;Atp5b;Atpif1;Bax;Bex1;Cacybp;Calr;Capzb;Cd63;Cdk1;Cnn2;Csda;Cst3;Cth;Ctnnb1;Cyr61;Ddx5;Dynll1;Eif4ebp1;Eif5a;Eno1;Fkbp1a;Fkbp4;Fn1;Fth1;Gnai2;Gnb2l1;Gpi1;Gpx1;Gstp1;Hmga1;Hmgb1;Hmgb2;Hnrnpa2b1;Hnrnpab;Hsp90ab1;Hsp90b1;Hspa5;Hspa8;Hspb1;Hspd1;Id1;Ifitm3;Itgb1;Itm2b;Krt18;Lgals1;Mid1;Mif;Mt1;Myc;Nedd4;Nme2;Npm1;Pabpc1;Park7;Pcna;Pebp1;Pfn1;Phb2;Pou5f1;Prdx2;Prmt1;Ptbp1…
Module6_esc	regulation_of_programmed_cell_death	4.77666e-06	5.22827e-05	14143	923	428	53	1.89746	Actn4;Apoe;Asns;Atpif1;Bax;Cdc42;Cdk1;Csda;Cst3;Cth;Ctnnb1;Cyr61;Ddx5;Eif5a;Fn1;Gnb2l1;Gpi1;Gpx1;Gstp1;Hmgb1;Hsp90ab1;Hsp90b1;Hspa5;Hspb1;Hspd1;Itgb1;Itm2b;Krt18;Ldha;Mif;Mt1;Myc;Ngfrap1;Nme2;Park7;Pdia3;Prdx1;Prdx2;Ptma;Rps27l;Rps3;Rps3a;Rps6;Serpine1;Set;Sgk1;Slc2a3;Sod1;Spp1;Thbs1;Timp1;Tpt1;Ybx1
Module6_esc	ADP_metabolic_process	5.51167e-06	5.92505e-05	14143	10	428	5	16.5222	Atp5a1;Atp5b;Atp5c1;Atp5d;Atp5e
Module6_esc	ribonucleoside_diphosphate_biosynthetic_process	5.51167e-06	5.92505e-05	14143	10	428	5	16.5222	Atp5a1;Atp5b;Atp5c1;Atp5d;Atp5e
Module6_esc	regulation_of_apoptotic_process	7.69296e-06	8.19675e-05	14143	914	428	52	1.87999	Actn4;Apoe;Asns;Atpif1;Bax;Cdc42;Cdk1;Csda;Cth;Ctnnb1;Cyr61;Ddx5;Eif5a;Fn1;Gnb2l1;Gpi1;Gpx1;Gstp1;Hmgb1;Hsp90ab1;Hsp90b1;Hspa5;Hspb1;Hspd1;Itgb1;Itm2b;Krt18;Ldha;Mif;Mt1;Myc;Ngfrap1;Nme2;Park7;Pdia3;Prdx1;Prdx2;Ptma;Rps27l;Rps3;Rps3a;Rps6;Serpine1;Set;Sgk1;Slc2a3;Sod1;Spp1;Thbs1;Timp1;Tpt1;Ybx1
Module6_esc	organelle_assembly	7.95166e-06	8.39806e-05	14143	84	428	12	4.72063	Flna;Rpl24;Rps14;Rps15;Rps17;Rps2;Rps25;Rps6;Rpsa;Tubb5;mt-Rnr1;mt-Rnr2
Module6_esc	nuclear_export	8.24478e-06	8.63192e-05	14143	58	428	10	5.69731	Calr;Ddx39b;Eif5a;Hnrnpa1;Hspa9;Npm1;Ran;Rps15;Rps28;Rpsa
Module6_esc	cellular_component_organization_or_biogenesis_at_cellular_level	8.93623e-06	9.27519e-05	14143	2243	428	102	1.50269	Actb;Actg1;Actn4;Anxa2;Apoe;Bax;Calr;Cap1;Capzb;Cct2;Cdc42;Cdk1;Cfl1;Cnn2;Cnn3;Cst3;Ctgf;Ctnnb1;Cyr61;Ddx39b;Dek;Dynlt1b;Ebna1bp2;Eif3d;Fbl;Fkbp1a;Fkbp4;Flna;Fn1;Fscn1;Gpx1;Gpx4;H2afz;Hmga1;Hmgb1;Hmgb2;Hmgn1;Hsp90aa1;Hsp90b1;Itgb1;Krt8;Morf4l1;Myc;Nap1l1;Nop56;Npm1;Nudc;Park7;Pfn1;Phgdh;Pomp;Prmt1;Ran;Ranbp1;Rbbp4;Rbbp7;Rcc2;Rpl11;Rpl14;Rpl24;Rpl26;Rpl35a;Rpl7;Rplp0;Rps14;Rps15;Rps16;Rps17;Rps18;…
Module6_esc	positive_regulation_of_binding	9.82768e-06	0.000100541	14143	72	428	11	5.04845	Anxa2;Calm1;Edf1;Eno1;Fkbp1a;Hmgb1;Hmgb2;Hsp90ab1;Ran;S100a10;Txn1
Module6_esc	nucleoside_diphosphate_biosynthetic_process	9.85365e-06	0.000100541	14143	11	428	5	15.0202	Atp5a1;Atp5b;Atp5c1;Atp5d;Atp5e
Module6_esc	cellular_component_organization_or_biogenesis	1.32634e-05	0.000134194	14143	2691	428	117	1.43671	Actb;Actg1;Actn4;Anxa2;Apoe;Arpc2;Bax;Calr;Cap1;Capzb;Cct2;Cdc42;Cdk1;Cfl1;Cnn2;Cnn3;Cst3;Ctgf;Cth;Ctnnb1;Cyr61;Dctpp1;Ddx39b;Dek;Dstn;Dynlt1b;Ebna1bp2;Eif3d;Fbl;Fkbp1a;Fkbp4;Flna;Fn1;Fscn1;Gpx1;Gpx4;H2afz;Hmga1;Hmgb1;Hmgb2;Hmgn1;Hnrnpab;Hsp90aa1;Hsp90ab1;Hsp90b1;Id1;Itgb1;Krt8;Mif;Morf4l1;Myc;Myl12a;Nap1l1;Nme2;Nop56;Npm1;Nudc;Park7;Pfn1;Phgdh;Pomp;Prmt1;Ran;Ranbp1;Rbbp4;Rbbp7;Rcc2;Rpl11;Rpl14;R…
Module6_esc	hydrogen_peroxide_metabolic_process	1.43938e-05	0.000144417	14143	19	428	6	10.4351	Gpx1;Gpx4;Park7;Prdx1;Prdx2;Sod1
Module6_esc	ncRNA_processing	1.88631e-05	0.000187696	14143	190	428	18	3.13052	Ebna1bp2;Fbl;Rpl11;Rpl14;Rpl26;Rpl35a;Rpl7;Rps15;Rps16;Rps17;Rps19;Rps21;Rps24;Rps28;Rps6;Rps7;Rps8;Rpsa
Module6_esc	regulation_of_binding	2.2213e-05	0.000219217	14143	157	428	16	3.36758	Anxa2;Bax;Calm1;Cdc42;Edf1;Eno1;Fkbp1a;Hmgb1;Hmgb2;Hsp90ab1;Id1;Myc;Park7;Ran;S100a10;Txn1
Module6_esc	nucleoside_diphosphate_metabolic_process	2.46396e-05	0.000241188	14143	30	428	7	7.71036	Atp5a1;Atp5b;Atp5c1;Atp5d;Atp5e;Nme2;Rrm2
Module6_esc	purine_nucleoside_diphosphate_metabolic_process	2.61036e-05	0.00025143	14143	13	428	5	12.7094	Atp5a1;Atp5b;Atp5c1;Atp5d;Atp5e
Module6_esc	purine_ribonucleoside_diphosphate_metabolic_process	2.61036e-05	0.00025143	14143	13	428	5	12.7094	Atp5a1;Atp5b;Atp5c1;Atp5d;Atp5e
Module6_esc	regulation_of_RNA_splicing	2.65982e-05	0.00025326	14143	53	428	9	5.61131	Ddx5;Hnrnpa2b1;Hnrnpf;Hnrnph1;Npm1;Ptbp1;Rps26;Snrnp70;U2af2
Module6_esc	maturation_of_SSU-rRNA_from_tricistronic_rRNA_transcript_(SSU-rRNA,_5.8S_rRNA,_LSU-rRNA)	2.69246e-05	0.00025326	14143	7	428	4	18.8825	Rps21;Rps24;Rps8;Rpsa
Module6_esc	negative_regulation_of_microtubule_polymerization	2.69246e-05	0.00025326	14143	7	428	4	18.8825	Fkbp4;Sgk1;Stmn1;Stmn2
Module6_esc	regulation_of_protein_complex_assembly	3.03601e-05	0.000283361	14143	161	428	16	3.28391	Arpc2;Bax;Capzb;Cdc42;Eif4ebp1;Fkbp4;Gnb2l1;Hmgb1;Pfn1;Sgk1;Stmn1;Stmn2;Tmsb10;Tmsb4x;Tpm1;Vcp
Module6_esc	actin_filament-based_process	3.28794e-05	0.000304514	14143	255	428	21	2.7213	Actg1;Actn4;Calr;Cap1;Capzb;Cdc42;Cfl1;Cnn2;Cnn3;Flna;Fscn1;Hmgb1;Hsp90b1;Itgb1;Krt8;Myl6;Pfn1;Ran;Tmsb10;Tmsb4x;Tpm1
Module6_esc	nucleic_acid_metabolic_process	3.39509e-05	0.000312037	14143	2400	428	105	1.44569	Anp32a;Atf4;Banf1;Bax;Btf3;Bzw1;Cdk1;Cnbp;Csda;Ctnnb1;Ddb1;Ddx39b;Ddx5;Dynll1;Ebna1bp2;Edf1;Eif3e;Eif4g1;Eif4g2;Ewsr1;Fbl;Gars;Gnas;H2afz;Hdgf;Hmga1;Hmgb1;Hmgb2;Hmgn1;Hnrnpa1;Hnrnpa2b1;Hnrnpa3;Hnrnpab;Hnrnpd;Hnrnpf;Hnrnph1;Hnrnpk;Hnrnpl;Hnrnpm;Hnrnpu;Hspa8;Hspd1;Id1;Junb;Kars;Lars2;Lsm7;Morf4l1;Myc;Naca;Nap1l1;Nono;Npm1;Pabpc1;Pcbp1;Pcna;Phb2;Polr2f;Pou5f1;Rbbp4;Rbbp7;Rbm3;Rpl11;Rpl14;Rpl26;Rpl35…
Module6_esc	actin_cytoskeleton_organization	4.02536e-05	0.000367162	14143	239	428	20	2.76522	Actg1;Actn4;Calr;Cap1;Capzb;Cdc42;Cfl1;Cnn2;Cnn3;Flna;Fscn1;Hmgb1;Hsp90b1;Itgb1;Krt8;Pfn1;Ran;Tmsb10;Tmsb4x;Tpm1
Module6_esc	monovalent_inorganic_cation_transport	4.41543e-05	0.000399713	14143	184	428	17	3.05301	Atp1a1;Atp5a1;Atp5b;Atp5c1;Atp5d;Atp5e;Atp5f1;Atp5g3;Atp5h;Atp5l;Atp5o;Cox6c;Cox7c;Uqcr11;mt-Atp6;mt-Atp8;mt-Co1
Module6_esc	cellular_macromolecule_catabolic_process	4.45545e-05	0.000400326	14143	363	428	26	2.36682	Apoe;Bax;Ddb1;Eif3e;Hsp90b1;Hspa5;Lsm7;Myc;Nedd4;Pabpc1;Psma4;Psma6;Psma7;Psmb1;Psmb3;Psmb4;Psmb5;Psmb6;Psmb7;Rab7;Sec61b;Sod1;Ube2d3;Ube2i;Ube2s;Vcp
Module6_esc	negative_regulation_of_cytoskeleton_organization	5.13834e-05	0.000458264	14143	71	428	10	4.65414	Capzb;Fkbp4;Mid1;Pfn1;Sgk1;Stmn1;Stmn2;Tmsb10;Tmsb4x;Tpm1
Module6_esc	maturation_of_SSU-rRNA	5.25611e-05	0.000465321	14143	8	428	4	16.5222	Rps21;Rps24;Rps8;Rpsa
Module6_esc	purine_ribonucleoside_metabolic_process	5.41809e-05	0.000476159	14143	187	428	17	3.00404	Aprt;Cdc42;Eef2;Gars;Gnai2;Gnas;Gnb1;Gnb2;Kars;Nme2;Rab7;Ran;Tuba1a;Tuba1b;Tuba1c;Tubb4b;Tubb5
Module6_esc	regulation_of_cytoskeleton_organization	5.52834e-05	0.000482327	14143	225	428	19	2.79042	Arpc2;Capzb;Cdc42;Cfl1;Ctgf;Ctnnb1;Dstn;Dynlt1b;Fkbp4;Mid1;Npm1;Pfn1;Ranbp1;Sgk1;Stmn1;Stmn2;Tmsb10;Tmsb4x;Tpm1
Module6_esc	nucleocytoplasmic_transport	5.8062e-05	0.000499333	14143	152	428	15	3.26096	Anp32a;Calr;Cfl1;Ddx39b;Eif5a;Hnrnpa1;Hspa9;Ipo5;Kpna2;Npm1;Ran;Rps15;Rps28;Rpsa;Sec61b
Module6_esc	regulation_of_translation	5.8062e-05	0.000499333	14143	152	428	15	3.26096	Calr;Eif3k;Eif4ebp1;Eif4g1;Eif4g2;Eif5a;Gnb2l1;Pcbp1;Ppp1ca;Rbm3;Rps14;Rps27l;Rps4x;Rps5;Thbs1
Module6_esc	regulation_of_endopeptidase_activity	6.19356e-05	0.000528869	14143	189	428	17	2.97225	Bax;Cst3;Ctgf;Cyr61;Gpi1;Gpx1;Hmgb1;Hspa5;Hspd1;Myc;Ptma;Rps27l;Rps3;Serpine1;Serpinh1;Thbs1;Vcp
Module6_esc	nuclear_transport	6.75027e-05	0.000572347	14143	154	428	15	3.21861	Anp32a;Calr;Cfl1;Ddx39b;Eif5a;Hnrnpa1;Hspa9;Ipo5;Kpna2;Npm1;Ran;Rps15;Rps28;Rpsa;Sec61b
Module6_esc	purine_nucleoside_metabolic_process	7.06538e-05	0.000594527	14143	191	428	17	2.94112	Aprt;Cdc42;Eef2;Gars;Gnai2;Gnas;Gnb1;Gnb2;Kars;Nme2;Rab7;Ran;Tuba1a;Tuba1b;Tuba1c;Tubb4b;Tubb5
Module6_esc	transport	7.14504e-05	0.000594527	14143	2101	428	93	1.4627	Actn4;Anp32a;Anxa2;Ap2m1;Ap2s1;Apoe;Aprt;Arf1;Atp1a1;Atp5a1;Atp5b;Atp5c1;Atp5d;Atp5e;Atp5f1;Atp5g3;Atp5h;Atp5l;Atp5o;Bax;Calr;Cap1;Cdc42;Cfl1;Clic1;Cox6c;Cox7c;Ctgf;Ctnnb1;Ddx39b;Dynll1;Dynlrb1;Dynlt1b;Eif5a;Etfb;Fkbp1a;Fkbp4;Flna;Fth1;Gdi2;Hnrnpa1;Hnrnpa2b1;Hnrnpa3;Hsp90aa1;Hspa9;Ipo5;Itgb1;Kpna2;Krt18;Marcksl1;Myl12a;Naca;Ndufa4;Ndufa7;Nedd4;Npm1;Park7;Rab7;Ran;Ranbp1;Rpl11;Rps15;Rps19;Rps28;Rp…
Module6_esc	negative_regulation_of_cellular_component_organization	7.16e-05	0.000594527	14143	249	428	20	2.65417	Capzb;Cdc42;Cnn2;Eif4ebp1;Fkbp4;Gnb2l1;Hmgb1;Itgb1;Lgals1;Mid1;Npm1;Pfn1;Sgk1;Stmn1;Stmn2;Tmsb10;Tmsb4x;Tpm1;Vat1;Vim
Module6_esc	regulation_of_peptidase_activity	7.43618e-05	0.00061323	14143	230	428	19	2.72975	Bax;Cst3;Ctgf;Cyr61;Fn1;Gpi1;Gpx1;Hmgb1;Hspa5;Hspd1;Myc;Pebp1;Ptma;Rps27l;Rps3;Serpine1;Serpinh1;Thbs1;Vcp
Module6_esc	regulation_of_cysteine-type_endopeptidase_activity_involved_in_apoptotic_process	7.54885e-05	0.000618287	14143	138	428	14	3.35233	Bax;Ctgf;Cyr61;Gpi1;Gpx1;Hmgb1;Hspa5;Hspd1;Myc;Ptma;Rps27l;Rps3;Thbs1;Vcp
Module6_esc	negative_regulation_of_RNA_splicing	8.21703e-05	0.000668466	14143	16	428	5	10.3264	Hnrnpa2b1;Npm1;Ptbp1;Rps26;U2af2
Module6_esc	intracellular_transport	8.29604e-05	0.000670364	14143	604	428	36	1.96953	Anp32a;Ap2m1;Ap2s1;Atp5o;Bax;Calr;Cdc42;Cfl1;Ddx39b;Dynlt1b;Eif5a;Flna;Hnrnpa1;Hsp90aa1;Hspa9;Ipo5;Itgb1;Kpna2;Krt18;Myl12a;Nedd4;Npm1;Rab7;Ran;Ranbp1;Rpl11;Rps15;Rps28;Rpsa;Sec61b;Sod1;Timm23;Vcp;Ywhae;Ywhaq;Ywhaz
Module6_esc	regulation_of_cysteine-type_endopeptidase_activity	9.53777e-05	0.000765565	14143	141	428	14	3.281	Bax;Ctgf;Cyr61;Gpi1;Gpx1;Hmgb1;Hspa5;Hspd1;Myc;Ptma;Rps27l;Rps3;Thbs1;Vcp
Module6_esc	ion_transmembrane_transport	9.9459e-05	0.000793037	14143	255	428	20	2.59172	Atp1a1;Atp5a1;Atp5b;Atp5c1;Atp5d;Atp5e;Atp5f1;Atp5g3;Atp5h;Atp5l;Atp5o;Bax;Clic1;Cox6c;Cox7c;S100a6;Uqcr11;mt-Atp6;mt-Atp8;mt-Co1
Module6_esc	establishment_of_localization	0.000102761	0.000813973	14143	2150	428	94	1.44473	Actn4;Anp32a;Anxa2;Ap2m1;Ap2s1;Apoe;Aprt;Arf1;Atp1a1;Atp5a1;Atp5b;Atp5c1;Atp5d;Atp5e;Atp5f1;Atp5g3;Atp5h;Atp5l;Atp5o;Bax;Calr;Cap1;Cdc42;Cfl1;Clic1;Cox6c;Cox7c;Ctgf;Ctnnb1;Ddx39b;Dynll1;Dynlrb1;Dynlt1b;Eif5a;Etfb;Fkbp1a;Fkbp4;Flna;Fth1;Gdi2;Hnrnpa1;Hnrnpa2b1;Hnrnpa3;Hsp90aa1;Hspa9;Ipo5;Itgb1;Kpna2;Krt18;Marcksl1;Myl12a;Naca;Ndufa4;Ndufa7;Nedd4;Npm1;Nudc;Park7;Rab7;Ran;Ranbp1;Rpl11;Rps15;Rps19;Rps…
Module6_esc	ribonucleoside_metabolic_process	0.000124709	0.00098137	14143	200	428	17	2.80877	Aprt;Cdc42;Eef2;Gars;Gnai2;Gnas;Gnb1;Gnb2;Kars;Nme2;Rab7;Ran;Tuba1a;Tuba1b;Tuba1c;Tubb4b;Tubb5
Module0_pips1	translational_elongation	9.58667e-12	2.01224e-08	14143	56	1240	24	4.88813	Gm5121;Gm6030;Tceal5;Tceal7;mt-Ta;mt-Tc;mt-Te;mt-Tg;mt-Th;mt-Ti;mt-Tk;mt-Tl1;mt-Tl2;mt-Tm;mt-Tn;mt-Tp;mt-Tq;mt-Tr;mt-Ts1;mt-Ts2;mt-Tt;mt-Tv;mt-Tw;mt-Ty
Module0_pips1	G-protein_coupled_receptor_signaling_pathway	2.00879e-10	2.10823e-07	14143	304	1240	62	2.32615	A630033H20Rik;Adcy4;Adcy5;Adora2b;Adra1b;Adra2a;Agtr2;Apln;Avpr1a;Bdkrb2;C3ar1;C5ar1;Cacna1d;Ccr1;Ccr5;Ccrl1;Ccrl2;Celsr3;Cx3cr1;Cysltr1;Ednrb;F2;Gal;Gng8;Gpr146;Gpr149;Gpr157;Gpr25;Gpr34;Gpr4;Gpr45;Gpr65;Gpr84;Gpr88;Gprc5c;Grik3;Grpr;Htr7;Kcnk2;Lgr5;Lphn3;Mc5r;Mchr1;Npy1r;P2ry12;P2ry13;Pdyn;Pkd1l2;Ptgfr;Ptgir;Rgs1;Rgs14;Rgs5;Rgs6;Rgs7bp;Rgs9;Sstr4;Tac1;Tacr1;Tas1r1;Vipr1;Vipr2
Module0_pips1	defense_response	3.11143e-09	2.17697e-06	14143	363	1240	67	2.10517	Abcc9;Acp5;Adra2a;Agtr2;Bdkrb2;Btk;C5ar1;Camk4;Ccl3;Ccl4;Ccl5;Ccl8;Ccr1;Ccr5;Ccrl2;Cd86;Chst1;Clec4a2;Clec4d;Clec5a;Csf1r;Cxcl15;Cxcl2;Cxcl3;Cybb;Cysltr1;F2;Fcgr1;Fcgr2b;Fgr;Gal;Ggt5;Hist1h2ba;Ifi47;Ifit1;Iigp1;Il17b;Il18rap;Il1r1;Il1rl2;Irf5;Irf8;Kcnj8;Kng1;Lat;Ly86;Mapk8ip2;Marco;Mst1r;Mx2;Myo1f;Nlrp3;Nod2;Pik3cg;Ptprc;Rarres2;Saa1;Sarm1;Serpina1b;Tac1;Tlr1;Tlr13;Tlr5;Tlr6;Tlr7;Tlr8;Tril
Module0_pips1	cell_surface_receptor_signaling_pathway	1.09256e-08	5.7332e-06	14143	1113	1240	152	1.55764	A630033H20Rik;Adam33;Adcy4;Adcy5;Adora2b;Adra1b;Adra2a;Agtr2;Angptl1;Apln;Avpr1a;Axin2;Bdkrb2;Bmp2;C3ar1;C5ar1;Cacna1d;Cblc;Ccl3;Ccl5;Ccr1;Ccr5;Ccrl1;Ccrl2;Cd3e;Cd79b;Celsr3;Csf1r;Csf2rb;Csf2rb2;Cx3cr1;Cysltr1;Duox1;Ebi3;Ednrb;Epha1;Epha3;F2;Fcgr1;Fcgr2b;Fgf10;Fgf12;Fgf14;Fgf16;Fgf21;Fgf3;Fgf5;Fgf8;Fgfr4;Fgr;Foxh1;Frzb;Gal;Gdf6;Gdnf;Gng8;Gpr146;Gpr149;Gpr157;Gpr25;Gpr34;Gpr4;Gpr45;Gpr65;Gpr84;Gpr…
Module0_pips1	inflammatory_response	1.02134e-07	3.59458e-05	14143	181	1240	39	2.45757	Adra2a;Agtr2;Bdkrb2;Btk;Camk4;Ccl3;Ccl4;Ccl5;Ccl8;Ccr1;Ccrl2;Chst1;Csf1r;Cxcl15;Cxcl2;Cxcl3;Cysltr1;F2;Fcgr1;Gal;Ggt5;Hist1h2ba;Il17b;Kng1;Lat;Ly86;Nlrp3;Nod2;Pik3cg;Saa1;Serpina1b;Tac1;Tlr1;Tlr13;Tlr5;Tlr6;Tlr7;Tlr8;Tril
Module0_pips1	multicellular_organismal_process	1.14138e-07	3.59458e-05	14143	3109	1240	347	1.273	1700019N12Rik;4930447C04Rik;Acan;Acp5;Acsbg2;Actc1;Adap2;Adcy5;Adh1;Adora2b;Adra1b;Adra2a;Aff2;Agtr2;Aldh1a1;Alpk3;Alx4;Ank1;Apba1;Apln;Apoa2;Ar;Atp7b;Avpr1a;Axin2;Bcl11a;Bdkrb2;Bhlhe22;Bmp2;Bmp3;Bmp5;Btk;C3ar1;C5ar1;Cacna1b;Cacna1d;Camk4;Casp1;Cbfa2t3;Ccin;Ccl3;Ccl4;Ccl5;Ccr1;Ccr5;Cd300lf;Cd3e;Cdx1;Cdx2;Celsr3;Cftr;Chl1;Clcn1;Cldn19;Clec5a;Cntn2;Col13a1;Col8a2;Col9a1;Comp;Cplx1;Cryaa;Csf1r;Ctnna…
Module0_pips1	immune_response	1.19876e-07	3.59458e-05	14143	317	1240	57	2.05086	Aire;Bdkrb2;Btk;C3ar1;Ccl3;Ccl4;Ccl5;Ccl6;Ccl8;Ccl9;Ccr1;Clec4a2;Clec4d;Clec4e;Clec5a;Csf1r;Cx3cr1;Cxcl15;Cxcl2;Cxcl3;Cybb;Fcgr1;Fcgr2b;Fgr;Gm885;Ifit1;Iigp1;Il18rap;Il1r1;Il1rl2;Irf5;Irf8;Klhl6;Lat;Lilrb3;Ltb;Ly86;Marco;Mst1r;Mx2;Myo1f;Nod2;Osm;Pf4;Pou2f2;Sarm1;Tlr1;Tlr13;Tlr5;Tlr6;Tlr7;Tlr8;Tnfsf10;Tril;Vav1;Zap70;Zp3
Module0_pips1	myeloid_leukocyte_activation	2.45495e-07	5.79091e-05	14143	58	1240	19	3.73633	Aif1;Btk;Camk4;Casp1;Ccl3;Ccl5;Cd48;Cx3cr1;Fcgr2b;Gm885;Lat;Lcp2;Lilrb3;Myo1f;Nod2;Tlr1;Tlr6;Tlr7;Ubd
Module0_pips1	cell-cell_signaling	2.8541e-07	5.79091e-05	14143	325	1240	57	2.00037	Apba1;Bmp2;Btk;Cacna1b;Cacna1d;Camk4;Ccl3;Ccl5;Ccr1;Ccr5;Cplx1;Ctnna2;Dhh;Dlg2;Doc2b;Fgf10;Fgf3;Fgf8;Fgfr4;Foxa1;Gabrb2;Gad1;Gdnf;Gja5;Gria1;Grpr;Hgf;Hnf1a;Htr7;Ildr2;Lrp2;Maob;Mapk8ip2;Ncan;Neurod1;Nodal;Npy1r;Nrxn2;Ntf3;P2rx2;Rapgef4;Rapsn;Rims1;Shank3;Slc5a7;Snap25;Sox9;Stx1b;Syt4;Tac1;Tbx5;Tmem90b;Vgf;Wnt3;Wnt3a;Wnt4;Wnt7b
Module0_pips1	regulation_of_ion_transmembrane_transport	2.92901e-07	5.79091e-05	14143	139	1240	32	2.62576	Cacna1b;Cacna1d;Cacna1h;Cacng6;Cav3;Clcn1;Clcnkb;Cybb;Igf1;Kcna6;Kcne4;Kcng3;Kcnh1;Kcnh2;Kcnh3;Kcnip2;Kcnj12;Kcnj15;Kcnj2;Kcnj8;Kcnk2;Kcnq2;Kcns1;Mapk8ip2;Nalcn;P2ry12;Scn2a1;Scn3a;Scn7a;Shank3;Vdr;Zp3
Module0_pips1	system_process	3.03478e-07	5.79091e-05	14143	736	1240	105	1.62716	Actc1;Adcy5;Adora2b;Adra1b;Adra2a;Aff2;Agtr2;Apba1;Apln;Avpr1a;Bdkrb2;C3ar1;Cacna1b;Cacna1d;Camk4;Casp1;Ccl4;Cftr;Chl1;Clcn1;Cldn19;Cntn2;Cplx1;Cryaa;Ctnna2;Dlg2;Doc2b;Ednrb;Enpep;Fli1;Foxp2;Fxyd1;Gabrb2;Gad1;Gal3st1;Gdnf;Gm11744;Gprc5c;Gria1;Grpr;Gucy1a3;Hes5;Hnf1a;Hoxb8;Hoxd10;Hpn;Hsd11b2;Htr7;Igdcc3;Igf1;Kcnj8;Kcnmb4;Kcnq2;Kng1;Lgi4;Maob;Mapk8ip2;Mip;Mir23b;Mybpc2;Myh11;Myh6;Myl3;Myl4;Ncan;Npy…
Module0_pips1	immune_system_process	5.12702e-07	8.96802e-05	14143	762	1240	107	1.60158	Abcc9;Aif1;Aire;Ank1;Bcl11a;Bdkrb2;Blnk;Btk;C3ar1;C5ar1;Camk4;Casp1;Cbfa2t3;Ccl3;Ccl4;Ccl5;Ccl6;Ccl8;Ccl9;Ccr1;Cd300lf;Cd3e;Cd48;Cd79b;Cd86;Clec4a2;Clec4d;Clec4e;Clec5a;Csf1r;Cx3cr1;Cxcl15;Cxcl2;Cxcl3;Cybb;Dock2;Dpp4;Ednrb;Fcgr1;Fcgr2b;Fcgr4;Fgf10;Fgf3;Fgr;Gab3;Gm885;Hcls1;Hist1h2ba;Ifit1;Iigp1;Il16;Il17b;Il18rap;Il1r1;Il1rl2;Irf5;Irf8;Kcnj8;Kirrel3;Klhl6;Lat;Lcp2;Lilrb3;Ltb;Ly86;Madcam1;Marco;Mi…
Module0_pips1	cellular_chemical_homeostasis	2.17144e-06	0.000350603	14143	387	1240	62	1.82726	Adra1b;Agtr2;Aifm3;Atp7b;Avpr1a;Bdkrb2;C3ar1;C5ar1;Cacna1d;Cav3;Ccl3;Ccl5;Ccr1;Ccr5;Cntn2;Cxcl2;Cxcl3;Ednrb;F2;Foxa3;Fxyd1;Gal3st1;Gm14511;Gm5634;Gm5635;Gria1;Grik3;Hes5;Kcnh2;Kcnk2;Kcnmb4;Kcnq2;Kng1;Lgi4;Ltf;Mapk8ip2;Mchr1;Mir23b;Mir27a;Mlxipl;Neurod1;Npy1r;Ntf3;P2rx2;Pdgfra;Pik3cg;Pou3f2;Ptprc;Rims1;Rims4;S100b;Scn2a1;Scn3a;Shank3;Slc24a3;Slc30a3;Slc34a3;Tac1;Tacr1;Tfap2b;Ugt8a;Vdr
Module0_pips1	cellular_potassium_ion_transport	3.53014e-06	0.000493984	14143	45	1240	15	3.80188	Abcc9;Hpn;Kcna6;Kcne4;Kcng3;Kcnh1;Kcnh2;Kcnh3;Kcnip2;Kcnj8;Kcnk2;Kcnq2;Kcns1;P2ry12;Slc24a3
Module0_pips1	potassium_ion_transmembrane_transport	3.53014e-06	0.000493984	14143	45	1240	15	3.80188	Abcc9;Hpn;Kcna6;Kcne4;Kcng3;Kcnh1;Kcnh2;Kcnh3;Kcnip2;Kcnj8;Kcnk2;Kcnq2;Kcns1;P2ry12;Slc24a3
Module0_pips1	signaling	5.02715e-06	0.0006595	14143	2325	1240	261	1.28038	A630033H20Rik;Adam33;Adap2;Adcy4;Adcy5;Adora2b;Adra1b;Adra2a;Agtr2;Ahrr;Aif1;Angptl1;Ank1;Apba1;Apln;Ar;Arap3;Arhgap25;Arhgap30;Arl11;Asb16;Asb4;Avpr1a;Axin2;Bdkrb2;Blnk;Bmp2;Btk;C3ar1;C5ar1;Cacna1b;Cacna1d;Camk4;Cblc;Ccl3;Ccl5;Ccr1;Ccr5;Ccrl1;Ccrl2;Cd3e;Cd48;Cd79b;Cd86;Celsr3;Clcn1;Cldn19;Cntn2;Cplx1;Csf1r;Csf2rb;Csf2rb2;Ctnna2;Cx3cr1;Cxcl15;Cysltr1;Dapk2;Dhh;Dlg2;Dmrt1;Doc2b;Duox1;Ebi3;Ednrb;Ef…
Module0_pips1	anterior/posterior_pattern_specification	6.69164e-06	0.000813762	14143	174	1240	34	2.22869	Alx4;Axin2;Bmp2;Cdx1;Cdx2;Cyp26c1;Emx2;Fgf8;Foxa3;Foxh1;Hoxb2;Hoxb5;Hoxb8;Hoxc5;Hoxd10;Lefty1;Meox1;Meox2;Mesp2;Neurod1;Nodal;Nog;Osr1;Otx2;Pax1;Sfrp2;T;Tdrd5;Wnt16;Wnt3;Wnt3a;Wnt4;Wnt7b;Wnt8a
Module0_pips1	chemical_homeostasis	6.97843e-06	0.000813762	14143	514	1240	75	1.66425	Adra1b;Adra2a;Agtr2;Aifm3;Apoa2;Atp7b;Avpr1a;Bdkrb2;C3ar1;C5ar1;Cacna1d;Cav3;Ccl3;Ccl5;Ccr1;Ccr5;Cntn2;Cxcl2;Cxcl3;Ednrb;F2;Fgfr4;Foxa1;Foxa3;Fxyd1;Gal3st1;Gm14511;Gm5634;Gm5635;Gria1;Grik3;Hes5;Hnf1a;Hrc;Ifit1;Igf1;Kcnh2;Kcnk2;Kcnmb4;Kcnq2;Kng1;Lgi4;Ltf;Mapk8ip2;Mchr1;Mir23b;Mir27a;Mlxipl;Neurod1;Npy1r;Ntf3;P2rx2;Pdgfra;Pik3cg;Pla2g10;Pou3f2;Ptprc;Rims1;Rims4;S100b;Scn2a1;Scn3a;Shank3;Slc24a3;Sl…
Module0_pips1	chemotaxis	8.57025e-06	0.000917636	14143	222	1240	40	2.05507	C3ar1;C5ar1;Ccl3;Ccl4;Ccl5;Ccl6;Ccl8;Ccl9;Ccr1;Chl1;Cntn2;Cx3cr1;Cxcl15;Cxcl2;Cxcl3;Cysltr1;Dlx5;Dock2;Ednrb;Fgf10;Fgf8;Foxd2;Hgf;Il16;Il17b;Nog;Nr4a3;Nrcam;Ntf3;Otx2;Pdgfra;Pf4;Pik3cg;Pla2g10;Pou4f2;Ptpro;Robo2;Scg2;Wnt3;Wnt3a
Module0_pips1	potassium_ion_transport	8.74356e-06	0.000917636	14143	78	1240	20	2.92452	Abcc9;Hpn;Kcna6;Kcne4;Kcng3;Kcnh1;Kcnh2;Kcnh3;Kcnip2;Kcnj12;Kcnj15;Kcnj2;Kcnj8;Kcnk2;Kcnmb4;Kcnn2;Kcnq2;Kcns1;P2ry12;Slc24a3
Module0_pips1	taxis	9.57942e-06	0.000957486	14143	223	1240	40	2.04586	C3ar1;C5ar1;Ccl3;Ccl4;Ccl5;Ccl6;Ccl8;Ccl9;Ccr1;Chl1;Cntn2;Cx3cr1;Cxcl15;Cxcl2;Cxcl3;Cysltr1;Dlx5;Dock2;Ednrb;Fgf10;Fgf8;Foxd2;Hgf;Il16;Il17b;Nog;Nr4a3;Nrcam;Ntf3;Otx2;Pdgfra;Pf4;Pik3cg;Pla2g10;Pou4f2;Ptpro;Robo2;Scg2;Wnt3;Wnt3a
Module1_pips1	G-protein_coupled_receptor_signaling_pathway	1.22565e-10	3.78971e-07	14143	304	2976	112	1.75087	Adcyap1r1;Adora1;Adra1d;Adrb1;Agtr1a;Akr1c18;Bai1;Bai2;Calca;Ccr6;Cdk5r1;Cmklr1;Cort;Cxcr2;Cxcr4;Drd1a;Ecel1;Ednra;Emr1;Entpd1;Entpd2;Ereg;Fzd1;Fzd10;Fzd3;Fzd4;Fzd8;Gabra1;Gabra2;Galr2;Ghrl;Glrb;Gna15;Gnal;Gnao1;Gnat2;Gnaz;Gng13;Gng2;Gng3;Gng4;Gpr1;Gpr133;Gpr135;Gpr153;Gpr160;Gpr173;Gpr182;Gpr183;Gpr20;Gpr3;Gpr30;Gpr37;Gpr50;Gpr56;Gpr62;Gpr63;Gpr64;Gpr68;Gpr85;Gprc5b;Homer2;Hrh1;Htr2a;Htr2b;Htr5b…
Module1_pips1	system_process	1.08988e-08	1.34462e-05	14143	736	2976	218	1.40763	Abat;Ace;Actn3;Acvrl1;Adam22;Adm;Adora1;Adra1d;Adrb1;Agtr1a;Alox5;Amn;Amph;Angpt1;Aoc3;Apba2;Aqp2;Aqp5;Arhgef15;Atp1a2;Atp1a3;Atp2b2;Atp6v0a4;Atp6v1b1;Atxn1;Bbs1;Bbs10;Bche;Bcl2;Btc;C1ql3;Cabp4;Cacna1c;Cacna1g;Cacnb2;Cadps2;Calca;Camk2b;Cbln1;Cd34;Cdh23;Chrna7;Chrna9;Chrnb2;Chst10;Cnga3;Cngb1;Cntnap1;Col11a1;Col11a2;Col2a1;Cplx2;Crym;Cxcr4;Cyp7b1;Dpp6;Drd1a;Ednra;Egr2;Ephb1;Ephb2;Ephb3;Ephx2;Espn…
Module1_pips1	potassium_ion_transport	1.30461e-08	1.34462e-05	14143	78	2976	39	2.37618	Abcc8;Atp1a2;Atp1a3;Atp1b2;Fxyd2;Fxyd4;Hcn1;Hcn2;Hcn3;Kcna7;Kcnab1;Kcnab2;Kcnb1;Kcnc3;Kcnd1;Kcne2;Kcnf1;Kcnh6;Kcnip3;Kcnip4;Kcnj14;Kcnj3;Kcnj4;Kcnk10;Kcnk13;Kcnk6;Kcnk7;Kcnma1;Kcnmb2;Kcnn1;Kcnn4;Kcnq5;Kcnt2;Kcnu1;Slc12a5;Slc12a8;Slc24a5;Slc9a7;Trpm5
Module1_pips1	sensory_perception	1.70233e-07	0.00013159	14143	208	2976	76	1.73644	Ace;Adora1;Adrb1;Alox5;Atp2b2;Atp6v0a4;Atp6v1b1;Bbs1;Bbs10;Cabp4;Cacnb2;Calca;Cdh23;Chrna9;Chrnb2;Cnga3;Cngb1;Col11a1;Col11a2;Col2a1;Crym;Ednra;Ephb1;Ephx2;Espn;Eya4;Fzd4;Gjb2;Gjb4;Gjc3;Glrb;Gnal;Gnat2;Gng13;Grin2d;Guca1b;Gucy2e;Hoxa1;Htr2a;Il18;Irx5;Kcnip3;Kcnma1;Mak;Marveld2;Mtap1a;Myo1a;Olfr31;Olfr543;Olfr985;Omp;Opn3;P2rx3;P2ry2;Pou3f4;Pou4f1;Ppef2;Ptgs1;Rbp4;Rdh12;Rom1;Rpgrip1;Sag;Scnn1a;Sha…
Module1_pips1	multicellular_organismal_process	3.96896e-07	0.000205027	14143	3109	2976	755	1.15408	4930506M07Rik;6230427J02Rik;AI464131;AW551984;Abat;Abca5;Abcg1;Ace;Acrbp;Acsl6;Acta1;Actn3;Acvrl1;Adam1a;Adam22;Adamts13;Adamts2;Adcyap1r1;Adm;Adora1;Adra1d;Adrb1;Aff3;Ager;Agtr1a;Aipl1;Akap5;Alcam;Alox15;Alox5;Alox5ap;Amh;Amigo3;Amn;Amph;Angpt1;Angpt2;Angpt4;Anpep;Aoc3;Apba2;Aph1c;Apoc1;Apom;Aqp11;Aqp2;Aqp5;Arg1;Arhgap22;Arhgap24;Arhgap4;Arhgef15;Arid3b;Artn;Ascl2;Aspn;Asprv1;Atl1;Atoh8;Atp1a2;A…
Module1_pips1	neurological_system_process	4.21896e-07	0.000205027	14143	545	2976	163	1.42135	Abat;Ace;Adam22;Adora1;Adra1d;Adrb1;Agtr1a;Alox5;Amph;Apba2;Arhgef15;Atp1a2;Atp1a3;Atp2b2;Atp6v0a4;Atp6v1b1;Atxn1;Bbs1;Bbs10;Bche;C1ql3;Cabp4;Cacna1c;Cacna1g;Cacnb2;Cadps2;Calca;Camk2b;Cbln1;Cdh23;Chrna7;Chrna9;Chrnb2;Chst10;Cnga3;Cngb1;Cntnap1;Col11a1;Col11a2;Col2a1;Cplx2;Crym;Cxcr4;Cyp7b1;Dpp6;Drd1a;Ednra;Egr2;Ephb1;Ephb2;Ephb3;Ephx2;Espn;Eya4;Fgf2;Fgfr2;Fgfr3;Fkbp1b;Fzd4;Gabra1;Gabra2;Gch1;Ghr…
Module1_pips1	cytosolic_calcium_ion_homeostasis	4.93925e-07	0.000205027	14143	106	2976	45	2.01751	Adm;Agtr1a;Atp1a2;Atp2b2;Cacna1c;Cacna1g;Calca;Cd38;Cd52;Cdh23;Chrna9;Cxcl1;Cxcr2;Drd1a;Ednra;Epor;Fgf2;Fkbp1b;Galr2;Gck;Ghrl;Gna15;Gng3;Gpr3;Htr2a;Htr2b;Jph2;Kdr;Lpar1;Nmb;Npff;Npy2r;Oxtr;P2ry2;Ptger3;Pth1r;Ric3;Ryr1;Ryr2;S1pr1;Slc8a1;Slc8a2;Tbxa2r;Tgfa;Trpc1
Module1_pips1	ion_transport	5.30472e-07	0.000205027	14143	507	2976	153	1.43414	Abcc8;Ano9;Aqp11;Atp10d;Atp1a2;Atp1a3;Atp1b2;Atp2b2;Atp2c2;Atp4a;Atp6v0a4;Atp6v1b1;Atp6v1c2;Atp6v1g2;Best2;Bspry;Cacna1c;Cacna1g;Cacnb2;Cacng8;Camk2a;Camk2b;Catsper2;Cdh23;Chrna7;Chrna9;Chrnb2;Clcnka;Clic3;Cnga3;Cngb1;Cox4i2;Cox7a1;Cp;Cyp27b1;Efcab4a;Fam38b;Fgf2;Fkbp1b;Fxyd2;Fxyd4;Gabra1;Gabra2;Gabrp;Gck;Glrb;Grin2d;Grin3a;Grin3b;Hcn1;Hcn2;Hcn3;Heph;Hrh1;Htr2a;Htr2b;Kcna7;Kcnab1;Kcnab2;Kcnb1;Kcnc…
Module1_pips1	cell_fate_commitment	6.34522e-07	0.000217994	14143	147	2976	57	1.84275	AW551984;Bcl2;Chrdl1;Dll3;Dlx1;Dlx2;Eomes;Etv2;Eya1;Fgf1;Fgf2;Fgfr2;Fgfr3;Foxc1;Foxc2;Gap43;Gata2;Gata3;Gata4;Gata6;Gdf7;Gli2;Gsx1;Hey2;Hoxa11;Hoxa2;Hoxc10;Hoxd11;Il7;Kdr;Lhx6;Mef2c;Nanog;Notch1;Nr2f2;Ntrk3;Olig2;Pax6;Pax7;Pitx1;Pou4f1;Pparg;Prdm1;Prox1;Runx2;Six1;Six2;Six3;Sox5;Sox6;Tbx1;Tbx2;Tbx3;Tfap2c;Wnt2;Wnt2b;Wt1
Module1_pips1	cation_transport	7.78443e-07	0.000240695	14143	392	2976	123	1.49117	Abcc8;Atp10d;Atp1a2;Atp1a3;Atp1b2;Atp2b2;Atp2c2;Atp6v0a4;Atp6v1b1;Atp6v1c2;Atp6v1g2;Bspry;Cacna1c;Cacna1g;Cacnb2;Cacng8;Camk2a;Camk2b;Catsper2;Cdh23;Chrna7;Chrna9;Chrnb2;Cnga3;Cox4i2;Cox7a1;Cp;Cyp27b1;Efcab4a;Fam38b;Fgf2;Fkbp1b;Fxyd2;Fxyd4;Gck;Grin3a;Hcn1;Hcn2;Hcn3;Heph;Hrh1;Htr2a;Htr2b;Kcna7;Kcnab1;Kcnab2;Kcnb1;Kcnc3;Kcnd1;Kcne2;Kcnf1;Kcnh6;Kcnip3;Kcnip4;Kcnj14;Kcnj3;Kcnj4;Kcnk10;Kcnk13;Kcnk6;Kc…
Module1_pips1	transmembrane_transport	1.07032e-06	0.000300857	14143	449	2976	137	1.45005	Abcb1a;Abcb9;Abcc3;Abcc8;Adra1d;Aqp2;Aqp5;Atp1a2;Atp2b2;Atp6v0a4;Atp6v1b1;Atp6v1c2;Atp6v1g2;BC021785;Cacna1c;Cacna1g;Cacnb2;Cacng8;Catsper2;Cd36;Cdh17;Chrna7;Chrna9;Chrnb2;Clcnka;Cnga3;Cngb1;Cox4i2;Cox7a1;Folr2;Fxyd4;Gck;Gjb1;Gjc3;Glrb;Grin3a;Hcn1;Hcn2;Hcn3;Hrh1;Htr2b;Kcna7;Kcnab1;Kcnb1;Kcnc3;Kcnd1;Kcne2;Kcnf1;Kcnip3;Kcnip4;Kcnj14;Kcnk10;Kcnk13;Kcnk6;Kcnk7;Kcnma1;Kcnmb2;Kcnn4;Kcnq5;Kcnt2;Kcnu1;Mf…
Module1_pips1	regulation_of_multicellular_organismal_process	1.2072e-06	0.000311056	14143	1366	2976	357	1.24201	Ace;Acsl6;Acvrl1;Adm;Adora1;Adra1d;Adrb1;Afap1l2;Agtr1a;Akap5;Alox15;Alox5;Angpt2;Angpt4;Ankrd42;Anpep;Apoc1;Arhgap4;Arhgef15;Ascl2;Aspn;Atp1a2;Atp2b2;Bai1;Bai2;Bche;Bcl2;Bmp6;Bmp7;Bmpr1b;Boc;Btn1a1;Btn2a2;C1qc;Cacna1c;Cacna1g;Calca;Camk2a;Camk2b;Card9;Casq1;Cbln1;Cd34;Cd36;Cd38;Cd40;Cd74;Cdk5r1;Cebpa;Chi3l1;Chrd;Chrna7;Chrnb2;Clcf1;Clec2d;Clec2i;Clec4n;Cmklr1;Cntf;Cort;Cplx2;Cspg5;Ctla2a;Ctsh;Ct…
Module1_pips1	ion_transmembrane_transport	1.46468e-06	0.000348367	14143	255	2976	86	1.60275	Abcc8;Atp1a2;Atp2b2;Atp6v0a4;Atp6v1b1;Atp6v1c2;Atp6v1g2;Cacna1c;Cacna1g;Cacnb2;Cacng8;Catsper2;Chrna7;Chrna9;Chrnb2;Clcnka;Cnga3;Cngb1;Cox4i2;Cox7a1;Fxyd4;Gck;Glrb;Grin3a;Hcn1;Hcn2;Hcn3;Hrh1;Htr2b;Kcna7;Kcnb1;Kcnc3;Kcnd1;Kcne2;Kcnf1;Kcnip3;Kcnip4;Kcnj14;Kcnk10;Kcnk13;Kcnk6;Kcnk7;Kcnma1;Kcnmb2;Kcnn4;Kcnq5;Kcnt2;Kcnu1;P2rx1;P2rx3;P2rx5;Pkd2l2;Rhbg;Rhcg;Ryr1;Ryr2;Ryr3;Scn4b;Scn5a;Scn8a;Scnn1a;Slc11a…
Module1_pips1	cellular_potassium_ion_transport	1.83914e-06	0.000379108	14143	45	2976	24	2.53459	Abcc8;Fxyd4;Hcn1;Hcn2;Hcn3;Kcna7;Kcnb1;Kcnc3;Kcnd1;Kcne2;Kcnf1;Kcnip3;Kcnip4;Kcnk10;Kcnk13;Kcnk6;Kcnk7;Kcnma1;Kcnmb2;Kcnn4;Kcnq5;Kcnt2;Kcnu1;Trpm5
Module1_pips1	potassium_ion_transmembrane_transport	1.83914e-06	0.000379108	14143	45	2976	24	2.53459	Abcc8;Fxyd4;Hcn1;Hcn2;Hcn3;Kcna7;Kcnb1;Kcnc3;Kcnd1;Kcne2;Kcnf1;Kcnip3;Kcnip4;Kcnk10;Kcnk13;Kcnk6;Kcnk7;Kcnma1;Kcnmb2;Kcnn4;Kcnq5;Kcnt2;Kcnu1;Trpm5
Module1_pips1	cell_surface_receptor_signaling_pathway	2.31973e-06	0.000448288	14143	1113	2976	296	1.26388	Abl1;Acvrl1;Adam11;Adam22;Adam4;Adamts13;Adamts14;Adamts2;Adcyap1r1;Adora1;Adra1d;Adrb1;Agtr1a;Akr1c18;Amhr2;Angpt1;Angpt2;Angpt4;Aph1b;Aph1c;Artn;Atp1a3;Bai1;Bai2;Bcl2;Bmp6;Bmp7;Bmp8a;Bmp8b;Bmpr1b;Boc;Btc;Calca;Camk2a;Ccr6;Cd247;Cd36;Cd38;Cd3g;Cd40;Cd74;Cd79a;Cdk5r1;Cebpa;Cela1;Chrd;Clcf1;Clec2i;Clnk;Cmklr1;Cntf;Cort;Cxcr2;Cxcr4;Cxxc4;Dand5;Dixdc1;Dll3;Dner;Dok5;Drd1a;Dtx1;Ecel1;Ednra;Efna1;Efna…
Module1_pips1	cell-cell_signaling	3.69332e-06	0.00067175	14143	325	2976	103	1.50613	Abat;Adm;Adora1;Adrb1;Amph;Apba2;Arhgef15;Atp1a2;Atxn1;Bche;C1ql3;Cacna1c;Cacna1g;Cacnb2;Cadps2;Camk2b;Cbln1;Cd300a;Cd34;Chrna7;Chrnb2;Cplx2;Dlgap3;Drd1a;Ephb1;Ephb3;Ereg;Fcer1g;Fcgr3;Fgf1;Fgf2;Fgf7;Fgf9;Fgfr2;Fgfr3;Fkbp1b;Fzd1;Fzd4;Gabra1;Gabra2;Gata3;Gata4;Ghrl;Gjc3;Gli1;Gli2;Glrb;Grin2d;Grin3b;Hoxa11;Hoxa5;Hoxd11;Hrh1;Il1rn;Il6;Kcnma1;Klk8;Lin7b;Mafa;Mef2c;Naalad2;Napb;Npff;Npy2r;Nrxn1;O3far1;…
Module1_pips1	elevation_of_cytosolic_calcium_ion_concentration	4.01748e-06	0.000690113	14143	93	2976	39	1.99292	Adm;Agtr1a;Cacna1c;Cacna1g;Calca;Cd38;Cd52;Chrna9;Cxcl1;Cxcr2;Drd1a;Ednra;Epor;Fgf2;Fkbp1b;Galr2;Gck;Ghrl;Gna15;Gng3;Gpr3;Htr2a;Htr2b;Jph2;Kdr;Lpar1;Nmb;Npff;Npy2r;Oxtr;P2ry2;Ptger3;Pth1r;Ric3;Ryr1;S1pr1;Slc8a1;Slc8a2;Tbxa2r
Module1_pips1	metal_ion_transport	4.35805e-06	0.000709215	14143	303	2976	97	1.52138	Abcc8;Atp1a2;Atp1a3;Atp1b2;Atp2b2;Atp2c2;Bspry;Cacna1c;Cacna1g;Cacnb2;Cacng8;Camk2a;Camk2b;Catsper2;Cdh23;Chrna7;Chrnb2;Cp;Cyp27b1;Efcab4a;Fgf2;Fkbp1b;Fxyd2;Fxyd4;Gck;Grin3a;Hcn1;Hcn2;Hcn3;Heph;Hrh1;Htr2a;Htr2b;Kcna7;Kcnab1;Kcnab2;Kcnb1;Kcnc3;Kcnd1;Kcne2;Kcnf1;Kcnh6;Kcnip3;Kcnip4;Kcnj14;Kcnj3;Kcnj4;Kcnk10;Kcnk13;Kcnk6;Kcnk7;Kcnma1;Kcnmb2;Kcnn1;Kcnn4;Kcnq5;Kcnt2;Kcnu1;Lcn2;Mt3;Myb;Nfatc1;Nhedc2;Ni…
Module1_pips1	cartilage_development	5.95888e-06	0.000921242	14143	111	2976	44	1.88382	Barx2;Bmp6;Bmp7;Bmp8a;Bmp8b;Bmpr1b;Col11a1;Col11a2;Col2a1;Creb3l2;Csgalnact1;Dlx2;Fgf18;Fgf2;Fgf9;Fgfr3;Foxd3;Gdf5;Hand2;Hoxa11;Hoxa3;Hoxa5;Hoxb3;Hoxc4;Hoxd11;Lect1;Mef2c;Msx2;Mycn;Osr2;Pax7;Pitx1;Prrx2;Pth1r;Rarb;Runx2;Satb2;Scx;Shox2;Six2;Snai1;Sox5;Sox6;Wnt7a
Module3_pips1	macromolecule_modification	7.02865e-13	2.21051e-09	14143	1615	2977	453	1.33256	2410016O06Rik;Abca1;Abi2;Acvr1;Adar;Adarb1;Adck1;Adck5;Adm2;Aga;Agtpbp1;Akt3;Alg6;Alg8;Alg9;Alkbh1;Alkbh2;Alkbh8;Apbb1;Arl6;Asph;Ate1;Atf7ip;Atg5;Atg7;Atr;B230120H23Rik;B3galnt1;B4galt1;Bard1;Baz2a;Bcor;Bcr;Birc6;Bmp2k;Bmpr1a;Braf;Brcc3;Brpf1;Brpf3;Brsk1;Btg1;Btg2;Camk1;Camk1d;Camk2g;Cask;Ccdc101;Ccnt1;Cdc14b;Cdc25b;Cdc25c;Cdc27;Cdc42bpa;Cdc7;Cdc73;Cdk10;Cdk12;Cdk13;Cdk17;Cdk18;Cdk5;Cdk5rap1;Cdk6…
Module3_pips1	cellular_protein_modification_process	2.54597e-11	2.66903e-08	14143	1541	2977	427	1.3164	2410016O06Rik;Abca1;Abi2;Acvr1;Adck1;Adck5;Adm2;Aga;Agtpbp1;Akt3;Alg6;Alg8;Alg9;Apbb1;Arl6;Asph;Ate1;Atg5;Atg7;Atr;B230120H23Rik;B3galnt1;B4galt1;Bard1;Baz2a;Bcor;Bcr;Birc6;Bmp2k;Bmpr1a;Braf;Brcc3;Brpf1;Brpf3;Brsk1;Btg1;Btg2;Camk1;Camk1d;Camk2g;Cask;Ccdc101;Ccnt1;Cdc14b;Cdc25b;Cdc25c;Cdc27;Cdc42bpa;Cdc7;Cdc73;Cdk10;Cdk12;Cdk13;Cdk17;Cdk18;Cdk5;Cdk6;Cdk7;Chek2;Cit;Clip3;Clk3;Clspn;Cog3;Cog7;Cops7b…
Module3_pips1	protein_modification_process	2.54597e-11	2.66903e-08	14143	1541	2977	427	1.3164	2410016O06Rik;Abca1;Abi2;Acvr1;Adck1;Adck5;Adm2;Aga;Agtpbp1;Akt3;Alg6;Alg8;Alg9;Apbb1;Arl6;Asph;Ate1;Atg5;Atg7;Atr;B230120H23Rik;B3galnt1;B4galt1;Bard1;Baz2a;Bcor;Bcr;Birc6;Bmp2k;Bmpr1a;Braf;Brcc3;Brpf1;Brpf3;Brsk1;Btg1;Btg2;Camk1;Camk1d;Camk2g;Cask;Ccdc101;Ccnt1;Cdc14b;Cdc25b;Cdc25c;Cdc27;Cdc42bpa;Cdc7;Cdc73;Cdk10;Cdk12;Cdk13;Cdk17;Cdk18;Cdk5;Cdk6;Cdk7;Chek2;Cit;Clip3;Clk3;Clspn;Cog3;Cog7;Cops7b…
Module3_pips1	organelle_organization	2.1051e-09	1.65514e-06	14143	1486	2977	403	1.28839	1810043G02Rik;2210018M11Rik;2410016O06Rik;2810021B07Rik;5730419I09Rik;Aars2;Abca1;Abcd3;Ablim1;Acd;Acot8;Acp2;Actr8;Agtpbp1;Aifm2;Akt3;Aktip;Als2;Apbb1;Apc;Arhgap17;Arhgef18;Arhgef2;Arhgef5;Arid2;Aspm;Atg12;Atg13;Atg5;Atg7;Atg9a;Atl3;Avil;B230120H23Rik;Bahd1;Baz2a;Bbc3;Bbs2;Bcar1;Bcor;Bcr;Bcs1l;Bet1;Bicd2;Birc6;Blm;Blzf1;Bnip1;Brcc3;Brpf1;Brpf3;Brsk1;Brwd1;Camsap1;Capn10;Casp7;Cav1;Cav2;Cbx2;Ccdc…
Module4_pips1	cellular_metabolic_process	3.38581e-34	9.29404e-31	14143	5514	2467	1232	1.2809	0610007P22Rik;2410022L05Rik;2610301G19Rik;2810405K02Rik;9430023L20Rik;AI314976;AI462493;Abcg2;Abhd5;Abi1;Abl2;Abt1;Acaa1a;Acaa2;Acadl;Acadm;Acads;Acadvl;Aco1;Acot1;Acot9;Acp1;Acsl3;Acsl5;Acy1;Ada;Adam10;Adam9;Adi1;Adipor2;Adpgk;Adrbk1;Aff4;Afg3l1;Afg3l2;Agap3;Agpat1;Agpat2;Agpat3;Agpat4;Agpat6;Agrn;Ahcyl1;Aifm1;Aimp2;Aip;Ak1;Ak3;Ak4;Akap2;Akap8;Akirin2;Akr1b8;Akt2;Alad;Aldh9a1;Alkbh3;Amd1;Amfr;Am…
Module4_pips1	metabolic_process	1.11151e-30	1.52554e-27	14143	6288	2467	1355	1.23538	0610007P14Rik;0610007P22Rik;2410022L05Rik;2610301G19Rik;2810405K02Rik;4833439L19Rik;9430023L20Rik;AI314976;AI462493;Aasdhppt;Abcg2;Abhd16a;Abhd4;Abhd5;Abi1;Abl2;Abt1;Acaa1a;Acaa2;Acad9;Acadl;Acadm;Acads;Acadvl;Acat1;Acbd3;Aco1;Acot1;Acot9;Acp1;Acsl3;Acsl5;Acy1;Ada;Adam10;Adam15;Adam9;Adi1;Adipor2;Adpgk;Adrbk1;Aff4;Afg3l1;Afg3l2;Agap3;Agpat1;Agpat2;Agpat3;Agpat4;Agpat6;Agrn;Ahcyl1;Aifm1;Aimp2;Aip;…
Module4_pips1	primary_metabolic_process	2.10365e-28	1.92484e-25	14143	5545	2467	1212	1.25306	0610007P14Rik;0610007P22Rik;2410022L05Rik;2610301G19Rik;2810405K02Rik;AI314976;Abhd4;Abhd5;Abi1;Abl2;Abt1;Acaa1a;Acaa2;Acadl;Acadm;Acads;Acadvl;Acbd3;Acot1;Acp1;Acsl3;Acsl5;Acy1;Ada;Adam10;Adam15;Adam9;Adi1;Adipor2;Adpgk;Adrbk1;Aff4;Afg3l1;Afg3l2;Agap3;Agpat1;Agpat2;Agpat3;Agpat4;Agpat6;Ahcyl1;Aifm1;Aimp2;Aip;Ak1;Ak3;Ak4;Akap8;Akirin2;Akr1b8;Akt2;Aldh9a1;Alkbh3;Amfr;Ampd2;Amz2;Anapc1;Anapc11;Anap…
Module4_pips1	cellular_macromolecule_metabolic_process	3.90516e-27	2.67991e-24	14143	4112	2467	942	1.31332	0610007P22Rik;2410022L05Rik;2610301G19Rik;Abi1;Abl2;Abt1;Acadm;Acp1;Adam10;Adam9;Adrbk1;Aff4;Afg3l1;Afg3l2;Agap3;Agrn;Ahcyl1;Aifm1;Aimp2;Aip;Akap8;Akirin2;Akt2;Alkbh3;Amfr;Anapc1;Anapc11;Anapc16;Anapc2;Anapc4;Anapc7;Aph1a;Apitd1;Aqr;Araf;Arid1a;Arih1;Arih2;Arnt;Arrb2;Asf1a;Asf1b;Asl;Asxl1;Atad2;Atf1;Atf5;Atf6b;Atg3;Atrx;Atxn7l3;Aurka;Aurkb;Axin1;Axl;B3gnt2;Bap1;Baz1a;Baz1b;Bckdk;Bcl10;Becn1;Bmi1;…
Module4_pips1	macromolecule_metabolic_process	2.42471e-23	1.33117e-20	14143	4465	2467	990	1.27112	0610007P22Rik;2410022L05Rik;2610301G19Rik;Aasdhppt;Abi1;Abl2;Abt1;Acadm;Acp1;Acy1;Adam10;Adam15;Adam9;Adrbk1;Aff4;Afg3l1;Afg3l2;Agap3;Agrn;Ahcyl1;Aifm1;Aimp2;Aip;Akap8;Akirin2;Akt2;Alkbh3;Amfr;Amz2;Anapc1;Anapc11;Anapc16;Anapc2;Anapc4;Anapc7;Aph1a;Apitd1;Aqr;Araf;Arid1a;Arih1;Arih2;Arnt;Arrb2;Asf1a;Asf1b;Asl;Asxl1;Atad2;Atf1;Atf5;Atf6b;Atg3;Atg4b;Atp6ap2;Atrx;Atxn7l3;Aurka;Aurkb;Axin1;Axl;B3gnt2;…
Module4_pips1	nitrogen_compound_metabolic_process	7.89189e-22	3.56834e-19	14143	3074	2467	719	1.3409	0610007P22Rik;2410022L05Rik;2610301G19Rik;AI314976;Abcg2;Abt1;Acadl;Acadm;Ada;Aff4;Agpat6;Ahcyl1;Aifm1;Ak1;Ak3;Ak4;Akap8;Akirin2;Akr1b8;Alad;Aldh9a1;Alkbh3;Amd1;Ampd2;Apitd1;Aqr;Arf6;Arfrp1;Arid1a;Arl2;Arl4a;Arnt;Arrb2;Asf1a;Asf1b;Asl;Asxl1;Atad1;Atad2;Atf1;Atf5;Atf6b;Atp6v1a;Atp6v1b2;Atp6v1c1;Atrx;Atxn7l3;Axin1;Azin1;Bad;Baz1a;Baz1b;Bmi1;Bnip3;Bptf;Brca1;Brd7;Brd8;Bre;Brms1;C1d;C80913;Cand1;Casc…
Module4_pips1	cellular_nitrogen_compound_metabolic_process	9.09959e-22	3.56834e-19	14143	2988	2467	702	1.34688	0610007P22Rik;2410022L05Rik;2610301G19Rik;AI314976;Abcg2;Abt1;Acadl;Acadm;Ada;Aff4;Agpat6;Ahcyl1;Aifm1;Ak1;Ak3;Ak4;Akap8;Akirin2;Alad;Aldh9a1;Alkbh3;Amd1;Ampd2;Apitd1;Aqr;Arf6;Arfrp1;Arid1a;Arl2;Arl4a;Arnt;Arrb2;Asf1a;Asf1b;Asl;Asxl1;Atad1;Atad2;Atf1;Atf5;Atf6b;Atp6v1a;Atp6v1b2;Atp6v1c1;Atrx;Atxn7l3;Axin1;Azin1;Bad;Baz1a;Baz1b;Bmi1;Bnip3;Bptf;Brca1;Brd7;Brd8;Bre;Brms1;C1d;C80913;Cand1;Casc3;Casp3…
Module4_pips1	nucleobase-containing_compound_metabolic_process	8.92923e-21	3.06384e-18	14143	2863	2467	673	1.34762	0610007P22Rik;2410022L05Rik;2610301G19Rik;AI314976;Abt1;Ada;Aff4;Ahcyl1;Aifm1;Ak1;Ak3;Ak4;Akap8;Akirin2;Alkbh3;Ampd2;Apitd1;Aqr;Arf6;Arfrp1;Arid1a;Arl2;Arl4a;Arnt;Arrb2;Asf1a;Asf1b;Asxl1;Atad1;Atad2;Atf1;Atf5;Atf6b;Atp6v1a;Atp6v1b2;Atp6v1c1;Atrx;Atxn7l3;Axin1;Bad;Baz1a;Baz1b;Bmi1;Bnip3;Bptf;Brca1;Brd7;Brd8;Bre;Brms1;C1d;C80913;Cand1;Casc3;Casp3;Cc2d1b;Ccar1;Ccdc59;Ccne2;Ccnh;Ccnk;Ccnl2;Cd3eap;Cdc…
Module4_pips1	nucleic_acid_metabolic_process	1.29264e-20	3.94254e-18	14143	2400	2467	581	1.38783	0610007P22Rik;2410022L05Rik;2610301G19Rik;Abt1;Aff4;Ahcyl1;Aifm1;Akap8;Akirin2;Alkbh3;Apitd1;Aqr;Arid1a;Arnt;Arrb2;Asf1a;Asf1b;Asxl1;Atad2;Atf1;Atf5;Atf6b;Atrx;Atxn7l3;Baz1a;Baz1b;Bmi1;Bnip3;Bptf;Brca1;Brd7;Brd8;Bre;Brms1;C1d;C80913;Cand1;Casc3;Casp3;Cc2d1b;Ccar1;Ccdc59;Ccne2;Ccnh;Ccnk;Ccnl2;Cd3eap;Cdc45;Cdc5l;Cdc6;Cdca5;Cdca7l;Cdk2;Cdk8;Cdyl;Cebpz;Cetn2;Cggbp1;Chaf1a;Chd1;Chd1l;Chek1;Cherp;Chtf1…
Module4_pips1	cellular_process	4.1132e-20	1.12907e-17	14143	8865	2467	1743	1.12717	0610007P22Rik;0610031J06Rik;1500003O03Rik;2410003K15Rik;2410022L05Rik;2610301G19Rik;2810002N01Rik;2810405K02Rik;2810407C02Rik;3200002M19Rik;4930453N24Rik;9430023L20Rik;AI314976;AI462493;Abcg2;Abhd5;Abi1;Abl2;Abr;Abt1;Acaa1a;Acaa2;Acadl;Acadm;Acads;Acadvl;Aco1;Acot1;Acot9;Acp1;Acsl3;Acsl5;Actr10;Acy1;Ada;Adam10;Adam15;Adam9;Adi1;Adipor2;Adpgk;Adrbk1;Aff4;Afg3l1;Afg3l2;Agap3;Aggf1;Agpat1;Agpat2;Agp…
Module4_pips1	RNA_metabolic_process	1.07457e-17	2.68154e-15	14143	2006	2467	489	1.3975	0610007P22Rik;2410022L05Rik;2610301G19Rik;Abt1;Aff4;Ahcyl1;Akirin2;Apitd1;Aqr;Arid1a;Arnt;Arrb2;Asf1a;Asf1b;Asxl1;Atad2;Atf1;Atf5;Atf6b;Atxn7l3;Baz1a;Baz1b;Bmi1;Bptf;Brd7;Brd8;Brms1;C1d;C80913;Cand1;Casc3;Cc2d1b;Ccar1;Ccdc59;Ccnh;Ccnk;Ccnl2;Cd3eap;Cdc5l;Cdca7l;Cdk8;Cdyl;Cebpz;Cggbp1;Chaf1a;Chd1;Cherp;Cic;Cnot1;Cnot2;Cnot3;Cnot6;Cnot7;Cnot8;Cobra1;Cpsf1;Cpsf2;Cpsf3;Cpsf4;Cpsf6;Cpsf7;Crcp;Crebzf;Cr…
Module4_pips1	RNA_processing	1.2192e-17	2.78891e-15	14143	478	2467	159	1.90696	0610007P22Rik;2610301G19Rik;Ahcyl1;Aqr;C1d;Casc3;Ccnl2;Cdc5l;Cherp;Cnot7;Cpsf1;Cpsf2;Cpsf3;Cpsf4;Cpsf6;Cpsf7;Crnkl1;Cstf1;Cstf2;Ctu2;Cwc22;Ddx20;Ddx41;Ddx46;Ddx47;Ddx56;Dhx38;Dimt1;Dis3;Drosha;Dus1l;Dus3l;Elac2;Exosc1;Exosc2;Exosc5;Exosc9;Fam103a1;Fip1l1;Frg1;Gemin5;Gemin6;Gemin7;Imp4;Ints1;Ints10;Ints3;Ints4;Ints7;Ints8;Jmjd6;Khsrp;Krr1;Larp7;Las1l;Lsm3;Lsm6;Luc7l3;Magohb;Mbnl1;Mbnl2;Mettl1;Mpho…
Module4_pips1	organelle_organization	4.64746e-17	9.81329e-15	14143	1486	2467	380	1.46601	1500003O03Rik;2410022L05Rik;3200002M19Rik;Abl2;Abr;Afg3l1;Afg3l2;Agap3;Aifm1;Aip;Akap2;Akap8;Anapc1;Anapc11;Anapc16;Anapc2;Anapc4;Anapc7;Ap1b1;Ap1g1;Ap1m1;Ap2b1;Ap3b1;Apitd1;Arf6;Arfip2;Arhgap21;Arid1a;Arl2;Arl8a;Arl8b;Asf1a;Asf1b;Asxl1;Atg16l1;Atg3;Atg4b;Atl2;Atxn7l3;Aurka;Aurkb;Axin1;Bad;Baiap2;Bap1;Baz1a;Baz1b;Bcl2l1;Becn1;Bid;Bmi1;Bnip3;Bod1;Bptf;Brca1;Brd1;Brd4;Brd8;Bre;Bscl2;Bub1;Bub1b;Capz…
Module4_pips1	cellular_component_organization_or_biogenesis_at_cellular_level	5.89652e-16	1.15614e-13	14143	2243	2467	528	1.34951	0610007P22Rik;1500003O03Rik;2410003K15Rik;2410022L05Rik;3200002M19Rik;Abl2;Abr;Afg3l1;Afg3l2;Agap3;Agrn;Aifm1;Aip;Akap2;Akap8;Anapc1;Anapc11;Anapc16;Anapc2;Anapc4;Anapc7;Ap1b1;Ap1g1;Ap1m1;Ap2b1;Ap3b1;Apitd1;Areg;Arf6;Arfip2;Arhgap21;Arid1a;Arl2;Arl3;Arl8a;Arl8b;Asap1;Asf1a;Asf1b;Asxl1;Atf1;Atg16l1;Atg3;Atg4b;Atl2;Atxn2;Atxn7l3;Aurka;Aurkb;Axin1;B3gnt2;B9d1;Bad;Baiap2;Bap1;Baz1a;Baz1b;Bcl2l1;Bdnf;…
Module4_pips1	cellular_component_organization_or_biogenesis	4.23129e-15	7.74327e-13	14143	2691	2467	611	1.30167	0610007P22Rik;1500003O03Rik;2410003K15Rik;2410022L05Rik;3200002M19Rik;Abl2;Abr;Acadl;Acadm;Acads;Acat1;Adam15;Afg3l1;Afg3l2;Agap3;Agrn;Aifm1;Aip;Ak3;Akap2;Akap8;Akt2;Alad;Amfr;Anapc1;Anapc11;Anapc16;Anapc2;Anapc4;Anapc7;Ap1b1;Ap1g1;Ap1m1;Ap2b1;Ap3b1;Ap3d1;Apitd1;Areg;Arf6;Arfip2;Arhgap21;Arid1a;Arl2;Arl3;Arl8a;Arl8b;Arpc5l;Asap1;Asf1a;Asf1b;Asxl1;Atf1;Atg16l1;Atg3;Atg4b;Atl2;Atxn2;Atxn7l3;Aurka;A…
Module4_pips1	gene_expression	4.93761e-14	8.47108e-12	14143	2319	2467	533	1.31765	0610007P22Rik;2410022L05Rik;2610301G19Rik;Abt1;Aff4;Afg3l1;Afg3l2;Ahcyl1;Aimp2;Aip;Akirin2;Aph1a;Apitd1;Aqr;Arid1a;Arnt;Arrb2;Asf1a;Asf1b;Asxl1;Atad2;Atf1;Atf5;Atf6b;Atp6ap2;Atxn7l3;B3gnt2;Baz1a;Baz1b;Bmi1;Bptf;Brd7;Brd8;Brms1;C1d;C80913;Cand1;Capn1;Casc3;Casp3;Cc2d1b;Ccar1;Ccdc59;Ccnh;Ccnk;Ccnl2;Cd3eap;Cdc5l;Cdca7l;Cdk8;Cdyl;Cebpz;Cggbp1;Chaf1a;Chd1;Cherp;Cic;Cnot1;Cnot2;Cnot3;Cnot6;Cnot7;Cnot8;…
Module4_pips1	cellular_component_biogenesis_at_cellular_level	1.24405e-12	2.00877e-10	14143	212	2467	80	2.16335	0610007P22Rik;2410003K15Rik;Atxn2;Brix1;C1d;Cirbp;Cnot7;Crnkl1;Ddx47;Ddx56;Ddx6;Dimt1;Dis3;Drosha;Dync1h1;Exoc4;Exosc1;Exosc2;Exosc5;Exosc9;Fam103a1;Frg1;Gemin6;Gnl1;Gnl3l;Gtpbp10;Gtpbp4;Imp4;Ipo9;Isg20l2;Krr1;Las1l;Lsg1;Lsm6;Mbnl1;Mina;Mphosph10;Mphosph6;Mrpl10;Mtg1;Naf1;Nip7;Nol9;Oxa1l;Pdcd11;Pex19;Pin4;Polr1b;Pop4;Pop5;Pqbp1;Prmt7;Prpf6;Rbfa;Rbm5;Rcl1;Rpl5;Rrn3;Rrp1b;Rrp36;Rrp8;Scaf11;Sdad1;Si…
Module4_pips1	mitosis	1.75224e-12	2.53152e-10	14143	240	2467	87	2.07817	3200002M19Rik;Akap8;Anapc1;Anapc11;Anapc16;Anapc2;Anapc4;Anapc7;Apitd1;Arl8a;Arl8b;Aurka;Aurkb;Bod1;Bub1;Bub1b;Ccnf;Ccnk;Cd2ap;Cdc23;Cdc26;Cdc6;Cdca2;Cdca5;Cdk2;Cenph;Cep55;Cetn2;Chfr;Ckap5;Dync1li1;Dynlt3;Fzr1;Haus1;Haus4;Haus5;Haus7;Haus8;Hells;Hmga2;Jtb;Kif11;Kif23;Kif2a;Kif2c;Mad2l2;Map2k1;Mapre1;Mapre2;Mcmbp;Ncapg;Ncaph;Ndc80;Nde1;Nek2;Nek9;Nuf2;Nup37;Nup43;Nusap1;Pds5a;Pinx1;Pmf1;Ppp1r12a;P…
Module4_pips1	nuclear_division	1.75224e-12	2.53152e-10	14143	240	2467	87	2.07817	3200002M19Rik;Akap8;Anapc1;Anapc11;Anapc16;Anapc2;Anapc4;Anapc7;Apitd1;Arl8a;Arl8b;Aurka;Aurkb;Bod1;Bub1;Bub1b;Ccnf;Ccnk;Cd2ap;Cdc23;Cdc26;Cdc6;Cdca2;Cdca5;Cdk2;Cenph;Cep55;Cetn2;Chfr;Ckap5;Dync1li1;Dynlt3;Fzr1;Haus1;Haus4;Haus5;Haus7;Haus8;Hells;Hmga2;Jtb;Kif11;Kif23;Kif2a;Kif2c;Mad2l2;Map2k1;Mapre1;Mapre2;Mcmbp;Ncapg;Ncaph;Ndc80;Nde1;Nek2;Nek9;Nuf2;Nup37;Nup43;Nusap1;Pds5a;Pinx1;Pmf1;Ppp1r12a;P…
Module4_pips1	M_phase_of_mitotic_cell_cycle	2.35015e-12	3.22557e-10	14143	245	2467	88	2.05915	3200002M19Rik;Akap8;Anapc1;Anapc11;Anapc16;Anapc2;Anapc4;Anapc7;Apitd1;Arl8a;Arl8b;Aurka;Aurkb;Bod1;Bub1;Bub1b;Ccnf;Ccnk;Cd2ap;Cdc23;Cdc26;Cdc6;Cdca2;Cdca5;Cdk2;Cenph;Cep55;Cetn2;Chfr;Ckap5;Dlgap5;Dync1li1;Dynlt3;Fzr1;Haus1;Haus4;Haus5;Haus7;Haus8;Hells;Hmga2;Jtb;Kif11;Kif23;Kif2a;Kif2c;Mad2l2;Map2k1;Mapre1;Mapre2;Mcmbp;Ncapg;Ncaph;Ndc80;Nde1;Nek2;Nek9;Nuf2;Nup37;Nup43;Nusap1;Pds5a;Pinx1;Pmf1;Ppp…
Module4_pips1	organelle_fission	3.18202e-12	4.15935e-10	14143	254	2467	90	2.03133	3200002M19Rik;Akap8;Anapc1;Anapc11;Anapc16;Anapc2;Anapc4;Anapc7;Apitd1;Arl8a;Arl8b;Atg3;Aurka;Aurkb;Bnip3;Bod1;Bub1;Bub1b;Ccnf;Ccnk;Cd2ap;Cdc23;Cdc26;Cdc6;Cdca2;Cdca5;Cdk2;Cenph;Cep55;Cetn2;Chfr;Ckap5;Dnm1l;Dync1li1;Dynlt3;Fzr1;Haus1;Haus4;Haus5;Haus7;Haus8;Hells;Hmga2;Jtb;Kif11;Kif23;Kif2a;Kif2c;Mad2l2;Map2k1;Mapre1;Mapre2;Mcmbp;Ncapg;Ncaph;Ndc80;Nde1;Nek2;Nek9;Nuf2;Nup37;Nup43;Nusap1;Pds5a;Pinx…
Module4_pips1	cell_division	4.7726e-12	5.9549e-10	14143	357	2467	115	1.84672	3200002M19Rik;Anapc1;Anapc11;Anapc16;Anapc2;Anapc4;Anapc7;Anxa11;Apitd1;Arl3;Arl8a;Arl8b;Aurka;Aurkb;Bcl2l1;Becn1;Bin3;Bmi1;Bod1;Bub1;Bub1b;Ccnd2;Ccne2;Ccnf;Ccnk;Ccny;Cd2ap;Cdc123;Cdc23;Cdc26;Cdc45;Cdc6;Cdca2;Cdca5;Cdk11b;Cdk2;Cenph;Cep110;Cep55;Cetn2;Chfr;Chmp3;Cinp;Ckap2;Ckap5;Dync1li1;Dynlt3;Ect2;Etv5;Fgfr1;Fzr1;Haus1;Haus4;Haus5;Haus7;Haus8;Hells;Hmga2;Jtb;Kif11;Kif13a;Kif20a;Kif23;Kif2a;Kif2…
Module4_pips1	ribonucleoprotein_complex_biogenesis	6.74716e-12	8.05259e-10	14143	199	2467	75	2.16063	0610007P22Rik;2410003K15Rik;Atxn2;Brix1;C1d;Cirbp;Cnot7;Crnkl1;Ddx47;Ddx56;Ddx6;Dimt1;Dis3;Drosha;Dync1h1;Exosc1;Exosc2;Exosc5;Exosc9;Fam103a1;Frg1;Gemin6;Gnl1;Gnl3l;Gtpbp10;Gtpbp4;Imp4;Ipo9;Isg20l2;Krr1;Las1l;Lsg1;Lsm6;Mbnl1;Mina;Mphosph10;Mphosph6;Mrpl10;Mtg1;Naf1;Nip7;Nol9;Pdcd11;Pin4;Pop4;Pop5;Pqbp1;Prmt7;Prpf6;Rbfa;Rbm5;Rcl1;Rpl5;Rrn3;Rrp1b;Rrp36;Rrp8;Scaf11;Sdad1;Sip1;Skiv2l2;Suv39h1;Tarbp2…
Module4_pips1	mitotic_cell_cycle	2.44111e-11	2.79202e-09	14143	361	2467	114	1.81038	3200002M19Rik;Akap8;Anapc1;Anapc11;Anapc16;Anapc2;Anapc4;Anapc7;Apitd1;Arl8a;Arl8b;Aurka;Aurkb;Bcl2l1;Bod1;Brd4;Bub1;Bub1b;Camk2d;Ccnd2;Ccnf;Ccnk;Ccny;Cd2ap;Cdc123;Cdc23;Cdc25a;Cdc26;Cdc6;Cdca2;Cdca5;Cdk2;Cenph;Cep55;Cetn2;Chek1;Chfr;Cib1;Ckap5;Dlgap5;Dync1li1;Dynlt3;E2f1;E2f5;E2f6;Foxm1;Fzr1;Haus1;Haus4;Haus5;Haus7;Haus8;Hells;Hmga2;Jtb;Katna1;Kif11;Kif23;Kif2a;Kif2c;Lrwd1;Mad2l2;Map2k1;Mapre1;M…
Module4_pips1	intracellular_transport	3.53286e-11	3.87908e-09	14143	604	2467	169	1.60407	1500003O03Rik;Adam10;Agap3;Ahcyl1;Aip;Ankrd27;Ap1b1;Ap1g1;Ap1m1;Ap1s2;Ap2a2;Ap2b1;Ap3b1;Ap3d1;Ap3m1;Arfip1;Arfrp1;Arhgap21;Arl3;Axin1;Bad;Bcap29;Bcl2l1;Bid;Bnip3;Ccs;Cep57;Chmp3;Chmp5;Chmp7;Cope;Copg2;D6Wsu116e;Dag1;Derl1;Dst;Dynll2;Ehd4;Enah;Ergic1;Exoc4;Fam53a;Fbxo22;Fxc1;Fyttd1;Gas6;Gga1;Gga2;Golga4;Golga7;Hdac6;Hes1;Hgs;Hif1a;Ift46;Ing1;Ipo13;Ipo9;Jun;Kif13a;Kif1c;Kif5b;Kpna1;Kpna3;Lsg1;Map2k…
Module4_pips1	ncRNA_processing	1.12001e-10	1.18247e-08	14143	190	2467	70	2.11211	0610007P22Rik;C1d;Ctu2;Ddx47;Ddx56;Dimt1;Dis3;Drosha;Dus1l;Dus3l;Elac2;Exosc1;Exosc2;Exosc5;Exosc9;Frg1;Imp4;Ints1;Ints10;Ints3;Ints4;Ints7;Ints8;Krr1;Las1l;Lsm6;Mettl1;Mphosph10;Mphosph6;Naf1;Nol9;Osgep;Pdcd11;Pin4;Pop4;Pop5;Pus1;Pusl1;Qtrt1;Rbfa;Rcl1;Rpl5;Rpp14;Rpp21;Rpp30;Rpp40;Rrp1b;Rrp36;Rrp8;Skiv2l2;Suv39h1;Tarbp2;Tbl3;Tfb2m;Thg1l;Trmt6;Trnt1;Tsen15;Tsen54;Tsr2;Tyw1;Utp14a;Utp15;Utp18;Utp20…
Module4_pips1	cellular_component_biogenesis	1.35886e-10	1.38151e-08	14143	1076	2467	267	1.42256	0610007P22Rik;2410003K15Rik;Abl2;Acadl;Acadm;Acads;Acat1;Agrn;Aifm1;Ak3;Akap2;Alad;Amfr;Ap1b1;Ap2b1;Asf1a;Asf1b;Atf1;Atg16l1;Atg3;Atg4b;Atl2;Atxn2;Aurkb;Axin1;B9d1;Bad;Baiap2;Bcl10;Becn1;Bid;Bin3;Brix1;C1d;Cat;Cby1;Cep57;Chaf1a;Ciao1;Cirbp;Clint1;Cnot7;Col1a2;Cox15;Cpsf6;Cpsf7;Crnkl1;Cryab;Cuta;Cyba;Dcxr;Ddx47;Ddx56;Ddx6;Dhps;Dhrs4;Diap1;Dimt1;Dis3;Dlg1;Dnm1l;Drosha;Dst;Dync1h1;Dync2li1;Ect2;Ehd4…
Module4_pips1	macromolecule_localization	1.4854e-10	1.45622e-08	14143	1145	2467	281	1.40693	1500003O03Rik;Acsl5;Agap3;Agrn;Ahcyl1;Aip;Akap2;Akap7;Akt2;Ap1b1;Ap1g1;Ap1m1;Ap1s2;Ap2a2;Ap2b1;Ap3b1;Ap3d1;Ap3m1;Arf6;Arfgap2;Arfip1;Arfrp1;Arl2;Arl2bp;Arl3;Arrb2;Atg16l1;Atg3;Atg4b;Atp11a;Atp9a;Aurkb;Bcap29;Bid;Bin3;Bscl2;Bub1b;Casc3;Cby1;Cep57;Chchd4;Chmp2b;Chmp3;Chmp5;Chmp6;Chmp7;Cope;Copg2;Cript;Crot;Csnk1e;Ctdnep1;Cuta;Dag1;Ddx19a;Ddx42;Derl1;Diap1;Dlg1;Dnaja3;Dnm2;Dvl1;Ect2;Eif4enif1;Enpp1;…
Module4_pips1	cellular_component_organization_at_cellular_level	2.42271e-10	2.29322e-08	14143	2124	2467	474	1.27937	1500003O03Rik;2410022L05Rik;3200002M19Rik;Abl2;Abr;Afg3l1;Afg3l2;Agap3;Agrn;Aifm1;Aip;Akap2;Akap8;Anapc1;Anapc11;Anapc16;Anapc2;Anapc4;Anapc7;Ap1b1;Ap1g1;Ap1m1;Ap2b1;Ap3b1;Apitd1;Areg;Arf6;Arfip2;Arhgap21;Arid1a;Arl2;Arl3;Arl8a;Arl8b;Asap1;Asf1a;Asf1b;Asxl1;Atf1;Atg16l1;Atg3;Atg4b;Atl2;Atxn2;Atxn7l3;Aurka;Aurkb;Axin1;B3gnt2;B9d1;Bad;Baiap2;Bap1;Baz1a;Baz1b;Bcl2l1;Bdnf;Becn1;Bid;Bin3;Bmi1;Bnip3;Bo…
Module4_pips1	ribosome_biogenesis	2.76937e-10	2.53398e-08	14143	148	2467	58	2.24667	0610007P22Rik;2410003K15Rik;Brix1;C1d;Ddx47;Ddx56;Dimt1;Dis3;Drosha;Exosc1;Exosc2;Exosc5;Exosc9;Frg1;Gnl1;Gnl3l;Gtpbp10;Gtpbp4;Imp4;Ipo9;Isg20l2;Krr1;Las1l;Lsg1;Lsm6;Mina;Mphosph10;Mphosph6;Mrpl10;Mtg1;Naf1;Nip7;Nol9;Pdcd11;Pin4;Pop4;Pop5;Rbfa;Rcl1;Rpl5;Rrn3;Rrp1b;Rrp36;Rrp8;Sdad1;Skiv2l2;Suv39h1;Tbl3;Tfb2m;Tsr2;Utp14a;Utp15;Utp18;Utp20;Utp6;Wbp11;Wdr12;Wdr55
Module4_pips1	cell_cycle	4.67471e-10	4.13938e-08	14143	781	2467	203	1.49011	3200002M19Rik;Ak1;Akap8;Anapc1;Anapc11;Anapc16;Anapc2;Anapc4;Anapc7;Anxa11;Apitd1;Arl2;Arl3;Arl8a;Arl8b;Aurka;Aurkb;Bcl2l1;Becn1;Bin3;Bod1;Brca1;Brd4;Brd7;Bub1;Bub1b;Camk2d;Cast;Ccar1;Ccnd2;Ccndbp1;Ccne2;Ccnf;Ccnh;Ccnk;Ccny;Cd2ap;Cdc123;Cdc23;Cdc25a;Cdc26;Cdc45;Cdc5l;Cdc6;Cdca2;Cdca5;Cdk11b;Cdk2;Cdkn3;Cenph;Cep110;Cep55;Cetn2;Chaf1a;Chek1;Chfr;Chmp3;Chtf18;Chtf8;Cib1;Cinp;Ckap2;Ckap5;Csnk2a2;Cul7…
Module4_pips1	biosynthetic_process	5.59617e-10	4.80046e-08	14143	2659	2467	574	1.23756	0610007P14Rik;2410022L05Rik;2810405K02Rik;Aasdhppt;Abhd5;Abt1;Acadm;Acbd3;Acsl3;Acsl5;Ada;Adi1;Aff4;Agpat1;Agpat2;Agpat3;Agpat4;Agpat6;Aimp2;Ak1;Ak3;Akirin2;Akt2;Alad;Aldh9a1;Amd1;Ampd2;Apitd1;Arid1a;Arnt;Arrb2;Asf1a;Asf1b;Asl;Asnsd1;Asxl1;Atad2;Atf1;Atf5;Atf6b;Atxn7l3;Azin1;B3gnt2;Baz1a;Baz1b;Bmi1;Bptf;Brca1;Brd7;Brd8;Brms1;C1d;C80913;Cand1;Cc2d1b;Ccar1;Ccdc59;Ccne2;Ccnh;Ccnk;Ccnl2;Cd3eap;Cdc45;…
Module4_pips1	cellular_component_organization	5.92739e-10	4.93051e-08	14143	2565	2467	556	1.24268	1500003O03Rik;2410022L05Rik;3200002M19Rik;Abl2;Abr;Acadl;Acadm;Acads;Acat1;Adam15;Afg3l1;Afg3l2;Agap3;Agrn;Aifm1;Aip;Ak3;Akap2;Akap8;Akt2;Alad;Amfr;Anapc1;Anapc11;Anapc16;Anapc2;Anapc4;Anapc7;Ap1b1;Ap1g1;Ap1m1;Ap2b1;Ap3b1;Ap3d1;Apitd1;Areg;Arf6;Arfip2;Arhgap21;Arid1a;Arl2;Arl3;Arl8a;Arl8b;Arpc5l;Asap1;Asf1a;Asf1b;Asxl1;Atf1;Atg16l1;Atg3;Atg4b;Atl2;Atxn2;Atxn7l3;Aurka;Aurkb;Axin1;Axl;B3gnt2;B9d1;B…
Module4_pips1	cellular_biosynthetic_process	9.66539e-10	7.80338e-08	14143	2562	2467	554	1.23966	2410022L05Rik;2810405K02Rik;Abhd5;Abt1;Acadm;Acsl3;Acsl5;Ada;Adi1;Aff4;Agpat1;Agpat2;Agpat3;Agpat4;Agpat6;Aimp2;Ak1;Ak3;Akirin2;Akt2;Alad;Aldh9a1;Amd1;Ampd2;Apitd1;Arid1a;Arnt;Arrb2;Asf1a;Asf1b;Asl;Asnsd1;Asxl1;Atad2;Atf1;Atf5;Atf6b;Atxn7l3;Azin1;B3gnt2;Baz1a;Baz1b;Bmi1;Bptf;Brca1;Brd7;Brd8;Brms1;C1d;C80913;Cand1;Cc2d1b;Ccar1;Ccdc59;Ccne2;Ccnh;Ccnk;Ccnl2;Cd3eap;Cdc45;Cdc5l;Cdc6;Cdca7l;Cdk8;Cdyl;C…
Module4_pips1	mRNA_metabolic_process	1.09298e-09	8.57207e-08	14143	326	2467	101	1.77614	2610301G19Rik;Ahcyl1;Aqr;Casc3;Cdc5l;Cnot7;Cpsf1;Cpsf2;Cpsf3;Cpsf4;Cpsf6;Cpsf7;Crnkl1;Cstf1;Cstf2;Cwc22;Dcps;Ddx20;Ddx41;Ddx46;Ddx47;Dhx38;Exosc5;Exosc9;Fam103a1;Fip1l1;Frg1;Gemin5;Gemin6;Gemin7;Jmjd6;Khsrp;Lsm3;Lsm6;Luc7l3;Magohb;Mbnl1;Mbnl2;Ncbp1;Ncbp2;Paf1;Parn;Pdcd11;Phrf1;Pnpt1;Pnrc2;Pop4;Ppil3;Ppp4r2;Prmt7;Prpf3;Prpf38a;Prpf38b;Prpf4b;Prpf6;Qk;Rbfox2;Rbm22;Rbm25;Rbm26;Rbm28;Rbm38;Rbm5;Rbm8a…
Module4_pips1	protein_localization	1.13847e-09	8.68085e-08	14143	995	2467	246	1.41737	1500003O03Rik;Agap3;Agrn;Ahcyl1;Aip;Akap2;Akap7;Akt2;Ap1b1;Ap1g1;Ap1m1;Ap1s2;Ap2a2;Ap2b1;Ap3b1;Ap3d1;Ap3m1;Arf6;Arfgap2;Arfip1;Arfrp1;Arl2;Arl2bp;Arl3;Arrb2;Atg16l1;Atg3;Atg4b;Aurkb;Bcap29;Bid;Bin3;Bub1b;Cby1;Cep57;Chchd4;Chmp2b;Chmp3;Chmp5;Chmp6;Chmp7;Cope;Copg2;Cript;Csnk1e;Ctdnep1;Cuta;Dag1;Ddx19a;Ddx42;Derl1;Diap1;Dlg1;Dnaja3;Dnm2;Dvl1;Ect2;Eif4enif1;Eps15;Ercc3;Exoc4;Fam125a;Fam53a;Fxc1;Gas6…
Module4_pips1	mRNA_processing	1.40568e-09	1.04286e-07	14143	281	2467	90	1.83615	2610301G19Rik;Ahcyl1;Aqr;Casc3;Cdc5l;Cnot7;Cpsf1;Cpsf2;Cpsf3;Cpsf4;Cpsf6;Cpsf7;Crnkl1;Cstf1;Cstf2;Cwc22;Ddx20;Ddx41;Ddx46;Ddx47;Dhx38;Fam103a1;Fip1l1;Frg1;Gemin5;Gemin6;Gemin7;Jmjd6;Khsrp;Lsm3;Lsm6;Luc7l3;Magohb;Mbnl1;Mbnl2;Ncbp1;Ncbp2;Paf1;Parn;Pdcd11;Phrf1;Pnpt1;Pop4;Ppil3;Ppp4r2;Prmt7;Prpf3;Prpf38a;Prpf38b;Prpf4b;Prpf6;Qk;Rbfox2;Rbm22;Rbm25;Rbm26;Rbm28;Rbm38;Rbm5;Rnmt;Rod1;Rsrc1;Scaf1;Scaf11;S…
Module4_pips1	cellular_localization	1.45148e-09	1.04851e-07	14143	1012	2467	249	1.41056	1500003O03Rik;Adam10;Agap3;Agrn;Ahcyl1;Aip;Akt2;Ankrd27;Anxa3;Ap1b1;Ap1g1;Ap1m1;Ap1s2;Ap2a2;Ap2b1;Ap3b1;Ap3d1;Ap3m1;Arf6;Arfip1;Arfrp1;Arhgap21;Arl2;Arl2bp;Arl3;Aurkb;Axin1;Axl;Bad;Bcap29;Bcl2l1;Bdnf;Bid;Bnip3;Bub1b;Casc3;Ccs;Cdc23;Cdca5;Cep57;Chmp3;Chmp5;Chmp7;Ciz1;Cope;Copg2;Csnk1e;Ctdnep1;Cyb5r4;D6Wsu116e;Dag1;Derl1;Diap1;Dlg1;Dnaja3;Dst;Dvl1;Dynll2;Ehd4;Enah;Ergic1;Exoc4;Fam53a;Fbxo22;Fez1;Fu…
Module4_pips1	M_phase	1.65868e-09	1.16746e-07	14143	354	2467	107	1.73282	3200002M19Rik;Akap8;Anapc1;Anapc11;Anapc16;Anapc2;Anapc4;Anapc7;Apitd1;Arl8a;Arl8b;Aurka;Aurkb;Bod1;Bub1;Bub1b;Ccnf;Ccnk;Cd2ap;Cdc23;Cdc26;Cdc6;Cdca2;Cdca5;Cdk2;Cenph;Cep55;Cetn2;Chfr;Ckap5;Dlgap5;Dync1li1;Dynlt3;Eif4g3;Fanca;Fzr1;Haus1;Haus4;Haus5;Haus7;Haus8;Hells;Hmga2;Jtb;Kif11;Kif23;Kif2a;Kif2c;Klhdc3;Mad2l2;Map2k1;Mapre1;Mapre2;Mcmbp;Mns1;Msh2;Nbn;Ncapg;Ncaph;Ncor1;Ndc80;Nde1;Nek2;Nek9;Nuf2…
Module4_pips1	protein_transport	3.93678e-09	2.70162e-07	14143	738	2467	190	1.47594	1500003O03Rik;Agap3;Ahcyl1;Aip;Ap1b1;Ap1g1;Ap1m1;Ap1s2;Ap2a2;Ap2b1;Ap3b1;Ap3d1;Ap3m1;Arf6;Arfgap2;Arfip1;Arfrp1;Arl3;Arrb2;Atg16l1;Atg3;Atg4b;Bcap29;Bid;Cep57;Chchd4;Chmp2b;Chmp3;Chmp5;Chmp6;Chmp7;Cope;Copg2;Dag1;Ddx19a;Derl1;Dnm2;Ect2;Eif4enif1;Eps15;Exoc4;Fam125a;Fam53a;Fxc1;Gas6;Gdi1;Gga1;Gga2;Gnptab;Golga4;Gosr2;Hdac6;Hes1;Hgs;Ift46;Ing1;Ipo13;Ipo9;Jun;Kdelr2;Kif13a;Kif20a;Kpna1;Kpna3;Lin7c;L…
Module4_pips1	establishment_of_protein_localization	4.94477e-09	3.31059e-07	14143	759	2467	194	1.46532	1500003O03Rik;Agap3;Ahcyl1;Aip;Ap1b1;Ap1g1;Ap1m1;Ap1s2;Ap2a2;Ap2b1;Ap3b1;Ap3d1;Ap3m1;Arf6;Arfgap2;Arfip1;Arfrp1;Arl3;Arrb2;Atg16l1;Atg3;Atg4b;Bcap29;Bid;Cep57;Chchd4;Chmp2b;Chmp3;Chmp5;Chmp6;Chmp7;Cope;Copg2;Cript;Dag1;Ddx19a;Derl1;Dnm2;Ect2;Eif4enif1;Eps15;Exoc4;Fam125a;Fam53a;Fxc1;Gas6;Gdi1;Gga1;Gga2;Gnptab;Golga4;Gosr2;Hdac6;Hes1;Hgs;Ift46;Ing1;Ipo13;Ipo9;Jun;Kdelr2;Kif13a;Kif20a;Kpna1;Kpna3;L…
Module4_pips1	cell_cycle_phase	5.10546e-09	3.33678e-07	14143	449	2467	127	1.62155	3200002M19Rik;Akap8;Anapc1;Anapc11;Anapc16;Anapc2;Anapc4;Anapc7;Apitd1;Arl8a;Arl8b;Aurka;Aurkb;Bcl2l1;Bod1;Brd4;Bub1;Bub1b;Camk2d;Ccnd2;Ccnf;Ccnk;Ccny;Cd2ap;Cdc123;Cdc23;Cdc25a;Cdc26;Cdc6;Cdca2;Cdca5;Cdk2;Cenph;Cep55;Cetn2;Chek1;Chfr;Ckap5;Dlgap5;Dync1li1;Dynlt3;E2f1;E2f5;E2f6;Eif4g3;Fanca;Foxm1;Fzr1;Haus1;Haus4;Haus5;Haus7;Haus8;Hells;Hmga2;Jtb;Katna1;Kif11;Kif23;Kif2a;Kif2c;Klhdc3;Lrwd1;Mad2l2;…
Module4_pips1	cellular_response_to_stress	6.1004e-09	3.89432e-07	14143	704	2467	182	1.48208	Agap3;Aifm1;Alkbh3;Amfr;Apitd1;Arnt;Asf1a;Atg16l1;Atg3;Atg4b;Atrx;Axin1;Axl;Baz1b;Bcl10;Becn1;Bnip3;Brca1;Bre;Casp3;Cat;Ccs;Cdc42ep5;Cdca5;Cdk2;Cetn2;Chac1;Chaf1a;Chchd6;Chd1l;Chek1;Cib1;Cinp;Coq7;Cryab;Cul4a;Dab2ip;Dap;Derl1;Dgkz;Dnajc10;Dtl;E2f1;Ect2;Eif2b1;Eif2b3;Epas1;Ercc1;Ercc3;Ero1l;Etv5;Eya3;Fads1;Fanca;Fbxo22;Fbxo6;Fen1;Foxm1;Foxo3;Fto;Fxn;Fzr1;G6pdx;Gas2l1;Gas6;Gnl1;Grb2;Gtf2h1;Gtf2h2;G…
Module4_pips1	rRNA_metabolic_process	8.32773e-09	5.19537e-07	14143	104	2467	43	2.37032	0610007P22Rik;C1d;Ddx47;Ddx56;Dimt1;Dis3;Drosha;Exosc1;Exosc2;Exosc5;Exosc9;Frg1;Imp4;Krr1;Las1l;Lsm6;Mphosph10;Mphosph6;Naf1;Nol9;Pdcd11;Pin4;Pop4;Pop5;Rbfa;Rcl1;Rpl5;Rrp1b;Rrp36;Rrp8;Skiv2l2;Suv39h1;Tbl3;Tfb2m;Tsr2;Utp14a;Utp15;Utp18;Utp20;Utp6;Wbp11;Wdr12;Wdr55
Module4_pips1	rRNA_processing	1.01058e-08	6.16452e-07	14143	101	2467	42	2.38397	0610007P22Rik;C1d;Ddx47;Ddx56;Dimt1;Dis3;Exosc1;Exosc2;Exosc5;Exosc9;Frg1;Imp4;Krr1;Las1l;Lsm6;Mphosph10;Mphosph6;Naf1;Nol9;Pdcd11;Pin4;Pop4;Pop5;Rbfa;Rcl1;Rpl5;Rrp1b;Rrp36;Rrp8;Skiv2l2;Suv39h1;Tbl3;Tfb2m;Tsr2;Utp14a;Utp15;Utp18;Utp20;Utp6;Wbp11;Wdr12;Wdr55
Module4_pips1	macromolecule_catabolic_process	1.20957e-08	7.21796e-07	14143	419	2467	119	1.62819	Afg3l1;Afg3l2;Agap3;Aifm1;Amfr;Anapc2;Anapc4;Aph1a;Arih1;Arih2;Arrb2;Axin1;Bap1;Bnip3;Capn1;Casc3;Casp3;Cast;Ccnf;Cd2ap;Cdc26;Chfr;Cln6;Cnot7;Cul2;Cul4a;Cul7;Cycs;Dcps;Derl1;Dis3;Dnajc10;Drosha;Dtl;Erlin2;Exosc5;Exosc9;Fbxl3;Fbxo6;Fbxw11;Fbxw5;Fbxw8;Fen1;Fzr1;Gaa;Gns;Hdac6;Hectd1;Herpud1;Ide;Jkamp;Ldlr;Lonp1;Lonp2;Lsm6;Man1b1;Ncbp1;Ncbp2;Nub1;Os9;Parn;Pcnp;Pja1;Pnpt1;Pnrc2;Pold1;Ppt1;Psmb10;Pygb;…
Module4_pips1	cellular_macromolecule_catabolic_process	1.55886e-08	9.1044e-07	14143	363	2467	106	1.67406	Agap3;Aifm1;Amfr;Anapc2;Anapc4;Arih1;Arih2;Arrb2;Bap1;Bnip3;Casc3;Casp3;Ccnf;Cd2ap;Cdc26;Chfr;Cln6;Cnot7;Cul2;Cul4a;Cul7;Cycs;Dcps;Derl1;Dis3;Dnajc10;Drosha;Dtl;Erlin2;Exosc5;Exosc9;Fbxl3;Fbxo6;Fbxw11;Fbxw5;Fbxw8;Fen1;Fzr1;Hdac6;Hectd1;Herpud1;Ide;Jkamp;Ldlr;Lonp1;Lonp2;Lsm6;Man1b1;Ncbp1;Ncbp2;Nub1;Os9;Parn;Pcnp;Pnpt1;Pnrc2;Pold1;Ppt1;Psmb10;Rad23a;Rbbp6;Rbm8a;Rnaseh2b;Rnaseh2c;Rnf20;Rnf4;Rnf40;R…
Module4_pips1	cellular_protein_metabolic_process	1.59856e-08	9.14176e-07	14143	2060	2467	450	1.25233	Abi1;Abl2;Acp1;Adam10;Adam9;Adrbk1;Afg3l1;Afg3l2;Agap3;Aimp2;Aip;Akt2;Amfr;Anapc1;Anapc11;Anapc16;Anapc2;Anapc4;Anapc7;Aph1a;Araf;Arih1;Arih2;Arrb2;Asl;Asxl1;Atg3;Atxn7l3;Aurka;Aurkb;Axin1;Axl;B3gnt2;Bap1;Baz1b;Bckdk;Bcl10;Bmi1;Bnip3;Brap;Brca1;Brd1;Brd4;Brd8;Bub1;Bub1b;C80913;Camk2d;Cand1;Ccnf;Ccnh;Cd2ap;Cdc23;Cdc26;Cdc42bpb;Cdk11b;Cdk16;Cdk2;Cdk8;Cdkn3;Chek1;Chfr;Chordc1;Chuk;Clk2;Clk4;Clu;Cpne…
Module4_pips1	cell_cycle_process	2.05662e-08	1.15213e-06	14143	555	2467	148	1.52877	3200002M19Rik;Ak1;Akap8;Anapc1;Anapc11;Anapc16;Anapc2;Anapc4;Anapc7;Apitd1;Arl8a;Arl8b;Aurka;Aurkb;Bcl2l1;Bod1;Brca1;Brd4;Bub1;Bub1b;Camk2d;Ccnd2;Ccnf;Ccnk;Ccny;Cd2ap;Cdc123;Cdc23;Cdc25a;Cdc26;Cdc6;Cdca2;Cdca5;Cdk2;Cdkn3;Cenph;Cep55;Cetn2;Chek1;Chfr;Ckap2;Ckap5;Dlgap5;Dst;Dync1li1;Dynlt3;E2f1;E2f5;E2f6;Ect2;Eif4g3;Fanca;Fbxw5;Foxm1;Fzr1;Gas2l1;Haus1;Haus4;Haus5;Haus7;Haus8;Hells;Hmga2;Jtb;Katna1;…
Module4_pips1	establishment_of_localization_in_cell	2.90692e-08	1.5959e-06	14143	814	2467	202	1.42265	1500003O03Rik;Adam10;Agap3;Ahcyl1;Aip;Ankrd27;Anxa3;Ap1b1;Ap1g1;Ap1m1;Ap1s2;Ap2a2;Ap2b1;Ap3b1;Ap3d1;Ap3m1;Arfip1;Arfrp1;Arhgap21;Arl3;Axin1;Axl;Bad;Bcap29;Bcl2l1;Bdnf;Bid;Bnip3;Ccs;Cdc23;Cdca5;Cep57;Chmp3;Chmp5;Chmp7;Cope;Copg2;Cyb5r4;D6Wsu116e;Dag1;Derl1;Dst;Dvl1;Dynll2;Ehd4;Enah;Ergic1;Exoc4;Fam53a;Fbxo22;Fez1;Furin;Fxc1;Fyttd1;Gas6;Gga1;Gga2;Gnpda1;Gnptab;Golga4;Golga7;Hdac6;Hes1;Hgs;Hif1a;Ift…
Module4_pips1	ncRNA_metabolic_process	3.72212e-08	2.00337e-06	14143	239	2467	76	1.82301	0610007P22Rik;C1d;Ctu2;Dalrd3;Dars2;Ddx47;Ddx56;Dimt1;Dis3;Drosha;Dus1l;Dus3l;Elac2;Exosc1;Exosc2;Exosc5;Exosc9;Frg1;Iars2;Imp4;Ints1;Ints10;Ints3;Ints4;Ints7;Ints8;Krr1;Las1l;Lsm6;Mettl1;Mphosph10;Mphosph6;Naf1;Nol9;Osgep;Pdcd11;Pin4;Pop4;Pop5;Pus1;Pusl1;Qtrt1;Rars2;Rbfa;Rcl1;Rpl5;Rpp14;Rpp21;Rpp30;Rpp40;Rrp1b;Rrp36;Rrp8;Skiv2l2;Suv39h1;Tarbp2;Tars2;Tbl3;Tfb2m;Thg1l;Trmt6;Trnt1;Tsen15;Tsen54;Tsr…
Module4_pips1	RNA_splicing	4.48324e-08	2.36664e-06	14143	215	2467	70	1.86652	2610301G19Rik;Aqr;Casc3;Cdc5l;Crnkl1;Cwc22;Ddx20;Ddx41;Ddx46;Ddx47;Dhx38;Frg1;Gemin5;Gemin6;Gemin7;Jmjd6;Khsrp;Lsm3;Lsm6;Luc7l3;Magohb;Mbnl1;Mbnl2;Ncbp1;Ncbp2;Ppil3;Ppp4r2;Prmt7;Prpf3;Prpf38a;Prpf38b;Prpf4b;Prpf6;Qk;Rbfox2;Rbm22;Rbm25;Rbm28;Rbm38;Rbm5;Rod1;Rsrc1;Scaf1;Scaf11;Scaf8;Sf3a1;Sf3a2;Sfswap;Sip1;Skiv2l2;Smn1;Smndc1;Snrnp200;Snrnp27;Snrpb2;Srpk1;Srsf2;Syf2;Thoc3;Thoc5;Thoc6;Tsen54;U2af1l4…
Module4_pips1	macromolecule_modification	4.65644e-08	2.41168e-06	14143	1615	2467	361	1.28147	Abi1;Abl2;Acp1;Adam10;Adam9;Adrbk1;Akt2;Alkbh3;Amfr;Anapc1;Anapc11;Anapc16;Anapc2;Anapc4;Anapc7;Araf;Arih1;Arih2;Arrb2;Asl;Asxl1;Atg3;Atxn7l3;Aurka;Aurkb;Axin1;Axl;B3gnt2;Bap1;Baz1b;Bckdk;Bcl10;Bmi1;Brap;Brca1;Brd1;Brd4;Brd8;Bub1;Bub1b;Camk2d;Cand1;Ccnf;Ccnh;Cdc23;Cdc26;Cdc42bpb;Cdk11b;Cdk16;Cdk2;Cdk8;Cdkn3;Chek1;Chfr;Chuk;Clk2;Clk4;Cpne3;Csk;Csnk1e;Csnk2a2;Ctdnep1;Ctdsp1;Ctdsp2;Ctr9;Cxxc1;Cyhr1;…
Module4_pips1	chromatin_modification	5.08732e-08	2.58606e-06	14143	344	2467	100	1.66653	2410022L05Rik;Arid1a;Asf1a;Asf1b;Asxl1;Atxn7l3;Bap1;Baz1a;Baz1b;Bmi1;Bnip3;Bptf;Brd1;Brd4;Brd8;Bre;Cdk2;Chd1;Chd1l;Chek1;Ctr9;Cxxc1;Dapk3;Dmap1;Dr1;Ep400;Eya3;H2afy2;Hcfc1;Hdac6;Hells;Hira;Hmg20b;Hmga2;Hmgn5;Ing3;Jmjd6;Kat5;Kdm1a;Kdm2a;Kdm3a;Kdm3b;Kdm4a;Kdm5c;L3mbtl2;Ldb1;Loxl2;Lrwd1;Map3k7;Mbtd1;Meaf6;Med24;Men1;Mgea5;Msl1;Msl3;Myst2;Nsd1;Paf1;Pcgf2;Phf17;Pole3;Pole4;Prmt7;Rbbp5;Rbm14;Rere;Rnf20…
Module4_pips1	cellular_protein_modification_process	5.73424e-08	2.8108e-06	14143	1541	2467	346	1.2872	Abi1;Abl2;Acp1;Adam10;Adam9;Adrbk1;Akt2;Amfr;Anapc1;Anapc11;Anapc16;Anapc2;Anapc4;Anapc7;Araf;Arih1;Arih2;Arrb2;Asl;Asxl1;Atg3;Atxn7l3;Aurka;Aurkb;Axin1;Axl;B3gnt2;Bap1;Baz1b;Bckdk;Bcl10;Bmi1;Brap;Brca1;Brd1;Brd4;Brd8;Bub1;Bub1b;Camk2d;Cand1;Ccnf;Ccnh;Cdc23;Cdc26;Cdc42bpb;Cdk11b;Cdk16;Cdk2;Cdk8;Cdkn3;Chek1;Chfr;Chuk;Clk2;Clk4;Cpne3;Csk;Csnk1e;Csnk2a2;Ctdnep1;Ctdsp1;Ctdsp2;Ctr9;Cxxc1;Cyhr1;Dab2ip;…
Module4_pips1	protein_modification_process	5.73424e-08	2.8108e-06	14143	1541	2467	346	1.2872	Abi1;Abl2;Acp1;Adam10;Adam9;Adrbk1;Akt2;Amfr;Anapc1;Anapc11;Anapc16;Anapc2;Anapc4;Anapc7;Araf;Arih1;Arih2;Arrb2;Asl;Asxl1;Atg3;Atxn7l3;Aurka;Aurkb;Axin1;Axl;B3gnt2;Bap1;Baz1b;Bckdk;Bcl10;Bmi1;Brap;Brca1;Brd1;Brd4;Brd8;Bub1;Bub1b;Camk2d;Cand1;Ccnf;Ccnh;Cdc23;Cdc26;Cdc42bpb;Cdk11b;Cdk16;Cdk2;Cdk8;Cdkn3;Chek1;Chfr;Chuk;Clk2;Clk4;Cpne3;Csk;Csnk1e;Csnk2a2;Ctdnep1;Ctdsp1;Ctdsp2;Ctr9;Cxxc1;Cyhr1;Dab2ip;…
Module4_pips1	catabolic_process	8.56212e-08	4.12334e-06	14143	1096	2467	257	1.3443	9430023L20Rik;Abhd4;Acaa1a;Acaa2;Acadl;Acadm;Acads;Acadvl;Aco1;Ada;Adpgk;Afg3l1;Afg3l2;Agap3;Aifm1;Akr1b8;Amfr;Anapc2;Anapc4;Aph1a;Arf6;Arfrp1;Arih1;Arih2;Arl2;Arl4a;Arrb2;Atad1;Atg16l1;Atg3;Atg4b;Atp6v1c1;Axin1;Bad;Bap1;Bckdha;Bckdhb;Bckdk;Becn1;Bnip3;Capn1;Casc3;Casp3;Cast;Cat;Cbr1;Cbr3;Ccnf;Cd2ap;Cdc26;Chd1l;Chfr;Cln6;Cnot7;Comt;Crot;Cul2;Cul4a;Cul7;Cycs;Dap;Dcps;Ddah2;Dera;Derl1;Dhps;Dis3;Dla…
Module4_pips1	chromosome_organization	1.70255e-07	8.05775e-06	14143	521	2467	137	1.50749	2410022L05Rik;Akap8;Arid1a;Asf1a;Asf1b;Asxl1;Atxn7l3;Bap1;Baz1a;Baz1b;Bmi1;Bnip3;Bptf;Brd1;Brd4;Brd8;Bre;Cdc23;Cdca5;Cdk2;Cenph;Chaf1a;Chd1;Chd1l;Chek1;Ctr9;Cxxc1;Dapk3;Dmap1;Dr1;Ep400;Ercc1;Eya3;H1f0;H2afj;H2afv;H2afy2;Hcfc1;Hdac6;Hells;Hira;Hist1h2af;Hmg20b;Hmga2;Hmgn5;Hp1bp3;Ing3;Jmjd6;Kat5;Kdm1a;Kdm2a;Kdm3a;Kdm3b;Kdm4a;Kdm5c;L3mbtl2;Ldb1;Loxl2;Lrwd1;Map3k7;Mbtd1;Mcmbp;Meaf6;Med24;Men1;Mgea5;M…
Module4_pips1	cellular_catabolic_process	1.8021e-07	8.38436e-06	14143	926	2467	221	1.36821	9430023L20Rik;Acaa1a;Acaa2;Acadl;Acadm;Acads;Acadvl;Aco1;Ada;Agap3;Aifm1;Akr1b8;Amfr;Anapc2;Anapc4;Arf6;Arfrp1;Arih1;Arih2;Arl2;Arl4a;Arrb2;Atad1;Atg16l1;Atg3;Atg4b;Atp6v1c1;Bap1;Bckdha;Bckdhb;Bckdk;Becn1;Bnip3;Capn1;Casc3;Casp3;Cat;Cbr1;Cbr3;Ccnf;Cd2ap;Cdc26;Chd1l;Chfr;Cln6;Cnot7;Crot;Cul2;Cul4a;Cul7;Cycs;Dap;Dcps;Ddah2;Dera;Derl1;Dis3;Dnajc10;Drosha;Dtd1;Dtl;Eci1;Enpp1;Ercc3;Erlin2;Etfdh;Exosc5…
Module4_pips1	chromatin_organization	3.08276e-07	1.41036e-05	14143	392	2467	108	1.57947	2410022L05Rik;Arid1a;Asf1a;Asf1b;Asxl1;Atxn7l3;Bap1;Baz1a;Baz1b;Bmi1;Bnip3;Bptf;Brd1;Brd4;Brd8;Bre;Cdk2;Chaf1a;Chd1;Chd1l;Chek1;Ctr9;Cxxc1;Dapk3;Dmap1;Dr1;Ep400;Eya3;H1f0;H2afj;H2afv;H2afy2;Hcfc1;Hdac6;Hells;Hira;Hist1h2af;Hmg20b;Hmga2;Hmgn5;Hp1bp3;Ing3;Jmjd6;Kat5;Kdm1a;Kdm2a;Kdm3a;Kdm3b;Kdm4a;Kdm5c;L3mbtl2;Ldb1;Loxl2;Lrwd1;Map3k7;Mbtd1;Meaf6;Med24;Men1;Mgea5;Msl1;Msl3;Mum1;Myst2;Nsd1;Paf1;Pcgf2;…
Module4_pips1	modification-dependent_macromolecule_catabolic_process	3.40284e-07	1.53128e-05	14143	238	2467	73	1.7584	Agap3;Amfr;Anapc2;Anapc4;Arih1;Arih2;Arrb2;Bap1;Ccnf;Cd2ap;Cdc26;Chfr;Cul2;Cul4a;Cul7;Derl1;Dnajc10;Dtl;Erlin2;Exosc9;Fbxl3;Fbxo6;Fbxw11;Fbxw5;Fbxw8;Fzr1;Hdac6;Hectd1;Herpud1;Jkamp;Lonp1;Man1b1;Nub1;Os9;Pcnp;Pnpt1;Rad23a;Rbbp6;Rnf20;Rnf4;Rnf40;Rnf5;Siah1b;Sirt2;Skp2;Smurf1;Tbl1x;Tceb1;Tnfaip1;Topors;Trpc4ap;Tsg101;Ube2d1;Ube2g2;Ube2w;Ube3c;Ube4b;Uchl5;Ufd1l;Usp15;Usp16;Usp19;Usp21;Usp22;Usp33;Usp…
Module4_pips1	protein_catabolic_process	3.79651e-07	1.68088e-05	14143	295	2467	86	1.67128	Afg3l1;Afg3l2;Agap3;Amfr;Anapc2;Anapc4;Aph1a;Arih1;Arih2;Arrb2;Axin1;Bap1;Bnip3;Cast;Ccnf;Cd2ap;Cdc26;Chfr;Cul2;Cul4a;Cul7;Derl1;Dnajc10;Dtl;Erlin2;Fbxl3;Fbxo6;Fbxw11;Fbxw5;Fbxw8;Fzr1;Hdac6;Hectd1;Herpud1;Ide;Jkamp;Lonp1;Lonp2;Man1b1;Nub1;Os9;Pcnp;Pja1;Ppt1;Psmb10;Rad23a;Rbbp6;Rnf20;Rnf4;Rnf40;Rnf5;Siah1b;Sirt2;Skp2;Smurf1;Spg7;Tbl1x;Tceb1;Tmed10;Tnfaip1;Topors;Trim24;Trpc4ap;Tsg101;Ube2d1;Ube2g2…
Module4_pips1	macromolecular_complex_subunit_organization	9.02984e-07	3.93339e-05	14143	655	2467	162	1.4179	Acadl;Acadm;Acads;Acat1;Aifm1;Ak3;Akap2;Alad;Amfr;Ap1b1;Ap2b1;Arid1a;Asf1a;Asf1b;Atf1;Atl2;Atxn2;Aurkb;Axin1;Baz1b;Bcl10;Bid;Cat;Cenph;Cep57;Cirbp;Clint1;Cnot7;Col1a2;Cox15;Cpsf6;Cpsf7;Crnkl1;Cryab;Cuta;Cyba;Dcxr;Ddx6;Dhps;Dhrs4;Diap1;Dnm1l;Dync1h1;Ect2;Ehd4;Eid2;Enah;Eps15;Evl;Fam103a1;Gemin6;Gja1;Gls;Grb2;Grhpr;H1f0;H2afj;H2afv;H2afy2;Hdac6;Hells;Hes1;Higd2a;Hip1;Hist1h2af;Hmgcr;Hp1bp3;Ide;Irak…
Module4_pips1	modification-dependent_protein_catabolic_process	9.19095e-07	3.93339e-05	14143	235	2467	71	1.73206	Agap3;Amfr;Anapc2;Anapc4;Arih1;Arih2;Arrb2;Bap1;Ccnf;Cd2ap;Cdc26;Chfr;Cul2;Cul4a;Cul7;Derl1;Dnajc10;Dtl;Erlin2;Fbxl3;Fbxo6;Fbxw11;Fbxw5;Fbxw8;Fzr1;Hdac6;Hectd1;Herpud1;Jkamp;Lonp1;Man1b1;Nub1;Os9;Pcnp;Rad23a;Rbbp6;Rnf20;Rnf4;Rnf40;Rnf5;Siah1b;Sirt2;Skp2;Smurf1;Tbl1x;Tceb1;Tnfaip1;Topors;Trpc4ap;Tsg101;Ube2d1;Ube2g2;Ube2w;Ube3c;Ube4b;Uchl5;Ufd1l;Usp15;Usp16;Usp19;Usp21;Usp22;Usp33;Usp36;Usp39;Usp4…
Module4_pips1	protein_metabolic_process	9.31403e-07	3.93339e-05	14143	2414	2467	504	1.19692	Abi1;Abl2;Acp1;Acy1;Adam10;Adam15;Adam9;Adrbk1;Afg3l1;Afg3l2;Agap3;Aimp2;Aip;Akt2;Amfr;Amz2;Anapc1;Anapc11;Anapc16;Anapc2;Anapc4;Anapc7;Aph1a;Araf;Arih1;Arih2;Arrb2;Asl;Asxl1;Atg3;Atg4b;Atp6ap2;Atxn7l3;Aurka;Aurkb;Axin1;Axl;B3gnt2;Bap1;Baz1b;Bckdk;Bcl10;Becn1;Blmh;Bmi1;Bnip3;Brap;Brca1;Brd1;Brd4;Brd8;Bub1;Bub1b;C1s;C80913;Camk2d;Cand1;Capn1;Capn5;Casp3;Cast;Ccnf;Ccnh;Cd2ap;Cd55;Cdc23;Cdc26;Cdc42b…
Module4_pips1	cellular_protein_catabolic_process	1.08e-06	4.49182e-05	14143	262	2467	77	1.68485	Agap3;Amfr;Anapc2;Anapc4;Arih1;Arih2;Arrb2;Bap1;Bnip3;Ccnf;Cd2ap;Cdc26;Chfr;Cul2;Cul4a;Cul7;Derl1;Dnajc10;Dtl;Erlin2;Fbxl3;Fbxo6;Fbxw11;Fbxw5;Fbxw8;Fzr1;Hdac6;Hectd1;Herpud1;Ide;Jkamp;Lonp1;Lonp2;Man1b1;Nub1;Os9;Pcnp;Ppt1;Psmb10;Rad23a;Rbbp6;Rnf20;Rnf4;Rnf40;Rnf5;Siah1b;Sirt2;Skp2;Smurf1;Tbl1x;Tceb1;Tnfaip1;Topors;Trpc4ap;Tsg101;Ube2d1;Ube2g2;Ube2w;Ube3c;Ube4b;Uchl5;Ufd1l;Usp15;Usp16;Usp19;Usp21;…
Module4_pips1	transcription,_DNA-dependent	1.17761e-06	4.82467e-05	14143	1477	2467	325	1.26147	2410022L05Rik;Abt1;Aff4;Akirin2;Apitd1;Arid1a;Arnt;Arrb2;Asf1a;Asf1b;Asxl1;Atad2;Atf1;Atf5;Atf6b;Atxn7l3;Baz1a;Baz1b;Bmi1;Bptf;Brd7;Brd8;Brms1;C1d;C80913;Cand1;Cc2d1b;Ccar1;Ccdc59;Ccnh;Ccnk;Ccnl2;Cd3eap;Cdc5l;Cdca7l;Cdk8;Cdyl;Cebpz;Cggbp1;Chaf1a;Chd1;Cic;Cnot1;Cnot2;Cnot3;Cnot6;Cnot7;Cnot8;Cobra1;Crcp;Crebzf;Csnk2a2;Ctbp2;Ctr9;Cxxc1;Dapk3;Dedd;Dmap1;Dpf2;Dr1;Dvl1;E2f1;E2f5;E2f6;E2f8;Eaf1;Ecd;Eid2…
Module4_pips1	RNA_localization	1.28044e-06	5.16882e-05	14143	83	2467	33	2.27934	Casc3;Ddx19a;Fmr1;Fyttd1;Khsrp;Magohb;Ncbp1;Ncbp2;Nup107;Nup160;Nup188;Nup37;Nup43;Nup50;Nup54;Nupl1;Nxt1;Phax;Pnpt1;Pom121;Prpf6;Qk;Ranbp2;Seh1l;Senp2;Stau1;Thoc3;Thoc5;Thoc6;Tmem48;Tst;Xpot;Yy1
Module4_pips1	RNA_biosynthetic_process	1.34179e-06	5.33801e-05	14143	1479	2467	325	1.25976	2410022L05Rik;Abt1;Aff4;Akirin2;Apitd1;Arid1a;Arnt;Arrb2;Asf1a;Asf1b;Asxl1;Atad2;Atf1;Atf5;Atf6b;Atxn7l3;Baz1a;Baz1b;Bmi1;Bptf;Brd7;Brd8;Brms1;C1d;C80913;Cand1;Cc2d1b;Ccar1;Ccdc59;Ccnh;Ccnk;Ccnl2;Cd3eap;Cdc5l;Cdca7l;Cdk8;Cdyl;Cebpz;Cggbp1;Chaf1a;Chd1;Cic;Cnot1;Cnot2;Cnot3;Cnot6;Cnot7;Cnot8;Cobra1;Crcp;Crebzf;Csnk2a2;Ctbp2;Ctr9;Cxxc1;Dapk3;Dedd;Dmap1;Dpf2;Dr1;Dvl1;E2f1;E2f5;E2f6;E2f8;Eaf1;Ecd;Eid2…
Module4_pips1	proteolysis_involved_in_cellular_protein_catabolic_process	1.43704e-06	5.60992e-05	14143	255	2467	75	1.68614	Agap3;Amfr;Anapc2;Anapc4;Arih1;Arih2;Arrb2;Bap1;Ccnf;Cd2ap;Cdc26;Chfr;Cul2;Cul4a;Cul7;Derl1;Dnajc10;Dtl;Erlin2;Fbxl3;Fbxo6;Fbxw11;Fbxw5;Fbxw8;Fzr1;Hdac6;Hectd1;Herpud1;Ide;Jkamp;Lonp1;Lonp2;Man1b1;Nub1;Os9;Pcnp;Psmb10;Rad23a;Rbbp6;Rnf20;Rnf4;Rnf40;Rnf5;Siah1b;Sirt2;Skp2;Smurf1;Tbl1x;Tceb1;Tnfaip1;Topors;Trpc4ap;Tsg101;Ube2d1;Ube2g2;Ube2w;Ube3c;Ube4b;Uchl5;Ufd1l;Usp15;Usp16;Usp19;Usp21;Usp22;Usp33…
Module4_pips1	ubiquitin-dependent_protein_catabolic_process	1.45102e-06	5.60992e-05	14143	229	2467	69	1.72737	Agap3;Amfr;Anapc2;Anapc4;Arih1;Arih2;Arrb2;Bap1;Ccnf;Cd2ap;Cdc26;Chfr;Cul2;Cul4a;Cul7;Derl1;Dnajc10;Dtl;Erlin2;Fbxl3;Fbxo6;Fbxw11;Fbxw5;Fbxw8;Fzr1;Hdac6;Hectd1;Herpud1;Jkamp;Man1b1;Nub1;Os9;Pcnp;Rad23a;Rbbp6;Rnf20;Rnf4;Rnf40;Rnf5;Siah1b;Sirt2;Skp2;Smurf1;Tbl1x;Tceb1;Tnfaip1;Topors;Trpc4ap;Tsg101;Ube2d1;Ube2g2;Ube2w;Ube3c;Ube4b;Uchl5;Ufd1l;Usp15;Usp16;Usp19;Usp21;Usp22;Usp33;Usp36;Usp39;Usp4;Usp47…
Module4_pips1	cellular_macromolecule_biosynthetic_process	1.52388e-06	5.80978e-05	14143	2046	2467	433	1.21326	2410022L05Rik;Abt1;Acadm;Aff4;Aimp2;Akirin2;Akt2;Apitd1;Arid1a;Arnt;Arrb2;Asf1a;Asf1b;Asxl1;Atad2;Atf1;Atf5;Atf6b;Atxn7l3;B3gnt2;Baz1a;Baz1b;Bmi1;Bptf;Brca1;Brd7;Brd8;Brms1;C1d;C80913;Cand1;Cc2d1b;Ccar1;Ccdc59;Ccne2;Ccnh;Ccnk;Ccnl2;Cd3eap;Cdc45;Cdc5l;Cdc6;Cdca7l;Cdk8;Cdyl;Cebpz;Cggbp1;Chaf1a;Chd1;Chtf18;Chtf8;Cic;Cinp;Cmas;Cnot1;Cnot2;Cnot3;Cnot6;Cnot7;Cnot8;Cobra1;Crcp;Crebzf;Csnk2a2;Ctbp2;Ctr9;…
Module4_pips1	cellular_macromolecule_localization	1.61019e-06	6.05474e-05	14143	555	2467	140	1.44613	1500003O03Rik;Agap3;Agrn;Ahcyl1;Aip;Akt2;Ap1b1;Ap1g1;Ap1m1;Ap1s2;Ap2a2;Ap2b1;Ap3b1;Ap3d1;Ap3m1;Arf6;Arfip1;Arfrp1;Arl2;Arl2bp;Aurkb;Bcap29;Bid;Bub1b;Casc3;Cep57;Copg2;Csnk1e;Ctdnep1;Dag1;Derl1;Diap1;Dlg1;Dnaja3;Dvl1;Exoc4;Fam53a;Fxc1;Gas6;Gga1;Gga2;Golga4;Hdac6;Hes1;Hgs;Ing1;Ipo13;Ipo9;Jub;Jun;Kdelr2;Kif13a;Kpna1;Kpna3;Lama5;Lamtor3;Lrwd1;Mapre1;Mgea5;Mrpl45;Mzt1;Ndc80;Nfkbia;Nfkbib;Nme7;Nuf2;Nup…
Module4_pips1	chromosome_segregation	1.65338e-06	6.13313e-05	14143	118	2467	42	2.04051	Akap8;Apitd1;Arl8a;Arl8b;Brca1;Brd4;Bub1;Cdc23;Cdca5;Cenph;Ciao1;Fam96a;Fam96b;Kif2c;Mcmbp;Mms19;Ncapg;Ncaph;Ndc80;Ndel1;Nek2;Nuf2;Nup37;Nup43;Nusap1;Pinx1;Pmf1;Pttg1;Seh1l;Sgol2;Smc1a;Smc2;Smc3;Spag5;Spc25;Srpk1;Stag2;Top1;Top2b;Usp9x;Zfp828;Zw10
Module4_pips1	nucleobase-containing_compound_transport	2.60264e-06	9.52566e-05	14143	89	2467	34	2.19009	Casc3;Ddx19a;Fmr1;Fyttd1;Gja1;Khsrp;Magohb;Ncbp1;Ncbp2;Nup107;Nup160;Nup188;Nup37;Nup43;Nup50;Nup54;Nupl1;Nxt1;Phax;Pnpt1;Pom121;Qk;Ranbp2;Seh1l;Senp2;Slc25a17;Slc28a1;Slc35b2;Thoc3;Thoc5;Thoc6;Tmem48;Tst;Xpot
Module4_pips1	macromolecule_biosynthetic_process	2.69805e-06	9.74491e-05	14143	2067	2467	435	1.20648	2410022L05Rik;Aasdhppt;Abt1;Acadm;Aff4;Aimp2;Akirin2;Akt2;Apitd1;Arid1a;Arnt;Arrb2;Asf1a;Asf1b;Asxl1;Atad2;Atf1;Atf5;Atf6b;Atxn7l3;B3gnt2;Baz1a;Baz1b;Bmi1;Bptf;Brca1;Brd7;Brd8;Brms1;C1d;C80913;Cand1;Cc2d1b;Ccar1;Ccdc59;Ccne2;Ccnh;Ccnk;Ccnl2;Cd3eap;Cdc45;Cdc5l;Cdc6;Cdca7l;Cdk8;Cdyl;Cebpz;Cggbp1;Chaf1a;Chd1;Chtf18;Chtf8;Cic;Cinp;Cmas;Cnot1;Cnot2;Cnot3;Cnot6;Cnot7;Cnot8;Cobra1;Crcp;Crebzf;Csnk2a2;Ct…
Module4_pips1	cellular_protein_localization	3.20189e-06	0.000114145	14143	552	2467	138	1.43322	1500003O03Rik;Agap3;Agrn;Ahcyl1;Aip;Akt2;Ap1b1;Ap1g1;Ap1m1;Ap1s2;Ap2a2;Ap2b1;Ap3b1;Ap3d1;Ap3m1;Arf6;Arfip1;Arfrp1;Arl2;Arl2bp;Aurkb;Bcap29;Bid;Bub1b;Cep57;Copg2;Csnk1e;Ctdnep1;Dag1;Derl1;Diap1;Dlg1;Dnaja3;Dvl1;Exoc4;Fam53a;Fxc1;Gas6;Gga1;Gga2;Golga4;Hdac6;Hes1;Hgs;Ing1;Ipo13;Ipo9;Jub;Jun;Kdelr2;Kif13a;Kpna1;Kpna3;Lama5;Lamtor3;Lrwd1;Mapre1;Mgea5;Mrpl45;Mzt1;Ndc80;Nfkbia;Nfkbib;Nme7;Nuf2;Nup54;Nup…
Module4_pips1	microtubule_cytoskeleton_organization	4.96008e-06	0.000174557	14143	193	2467	59	1.75254	1500003O03Rik;Ap1g1;Arl2;Aurkb;Axin1;Brca1;Cep57;Cetn2;Ckap5;Cript;Cryab;Dag1;Dock7;Dst;Dvl1;Fbxw5;Gas2l1;Haus1;Haus4;Haus5;Haus7;Haus8;Ift46;Katna1;Kif11;Kif20a;Kif23;Kif2a;Kif2c;Mtap1s;Ncor1;Ndc80;Nde1;Ndel1;Nek2;Nuf2;Numa1;Nusap1;Pex14;Plk4;Ppp1r12a;Ptk2;Racgap1;Ralbp1;Rock2;Sac3d1;Seh1l;Slain2;Spag5;Spc25;Tacc2;Tbce;Tppp3;Tubg1;Tubgcp3;Tubgcp4;Uxt;Zfp828;Zw10
Module4_pips1	covalent_chromatin_modification	5.63617e-06	0.000195839	14143	224	2467	66	1.68915	Asxl1;Atxn7l3;Bap1;Baz1b;Bmi1;Brd1;Brd4;Brd8;Cdk2;Chek1;Ctr9;Cxxc1;Dmap1;Dr1;Ep400;Eya3;Hcfc1;Hdac6;Hells;Hmga2;Ing3;Jmjd6;Kat5;Kdm1a;Kdm2a;Kdm3a;Kdm4a;Kdm5c;Ldb1;Loxl2;Map3k7;Meaf6;Med24;Men1;Mgea5;Msl3;Myst2;Nsd1;Paf1;Pcgf2;Phf17;Pole3;Pole4;Prmt7;Rbbp5;Rbm14;Rnf20;Rnf40;Rps6ka4;Rybp;Sap130;Setd3;Smyd2;Suv39h1;Suv420h1;Suv420h2;Suz12;Tada2a;Taf5l;Taf9;Usp16;Usp21;Usp22;Wac;Wdr82;Whsc1
Module4_pips1	histone_modification	7.05742e-06	0.000242158	14143	221	2467	65	1.68614	Asxl1;Atxn7l3;Bap1;Baz1b;Bmi1;Brd1;Brd4;Brd8;Cdk2;Chek1;Ctr9;Cxxc1;Dmap1;Dr1;Ep400;Eya3;Hcfc1;Hdac6;Hmga2;Ing3;Jmjd6;Kat5;Kdm1a;Kdm2a;Kdm3a;Kdm4a;Kdm5c;Ldb1;Loxl2;Map3k7;Meaf6;Med24;Men1;Mgea5;Msl3;Myst2;Nsd1;Paf1;Pcgf2;Phf17;Pole3;Pole4;Prmt7;Rbbp5;Rbm14;Rnf20;Rnf40;Rps6ka4;Rybp;Sap130;Setd3;Smyd2;Suv39h1;Suv420h1;Suv420h2;Suz12;Tada2a;Taf5l;Taf9;Usp16;Usp21;Usp22;Wac;Wdr82;Whsc1
Module4_pips1	mitochondrion_organization	7.88939e-06	0.000267363	14143	170	2467	53	1.78731	Afg3l1;Afg3l2;Aifm1;Aip;Atg3;Bad;Bcl2l1;Bid;Bnip3;Casp3;Chchd6;Coq7;Dctn6;Dnaja3;Dnm1l;Epas1;Fxc1;Fxn;Gfm1;Higd2a;Hk2;Htra2;Jun;Letm1;Lonp1;Mapk9;Mfn1;Mrpl39;Msto1;Ndufaf4;Ndufs4;Nrf1;Opa1;Oxa1l;Pex5;Pim2;Pnpt1;Polg;Ppif;Pvrl2;Sdhaf1;Sod2;Spg7;Synj2bp;Tfb2m;Timm10;Timm8a1;Timm9;Tmem11;Tmem70;Tomm34;Yars2;Yme1l1
Module4_pips1	RNA_transport	8.48228e-06	0.000277189	14143	78	2467	30	2.20495	Casc3;Ddx19a;Fmr1;Fyttd1;Khsrp;Magohb;Ncbp1;Ncbp2;Nup107;Nup160;Nup188;Nup37;Nup43;Nup50;Nup54;Nupl1;Nxt1;Phax;Pnpt1;Pom121;Qk;Ranbp2;Seh1l;Senp2;Thoc3;Thoc5;Thoc6;Tmem48;Tst;Xpot
Module4_pips1	establishment_of_RNA_localization	8.48228e-06	0.000277189	14143	78	2467	30	2.20495	Casc3;Ddx19a;Fmr1;Fyttd1;Khsrp;Magohb;Ncbp1;Ncbp2;Nup107;Nup160;Nup188;Nup37;Nup43;Nup50;Nup54;Nupl1;Nxt1;Phax;Pnpt1;Pom121;Qk;Ranbp2;Seh1l;Senp2;Thoc3;Thoc5;Thoc6;Tmem48;Tst;Xpot
Module4_pips1	nucleic_acid_transport	8.48228e-06	0.000277189	14143	78	2467	30	2.20495	Casc3;Ddx19a;Fmr1;Fyttd1;Khsrp;Magohb;Ncbp1;Ncbp2;Nup107;Nup160;Nup188;Nup37;Nup43;Nup50;Nup54;Nupl1;Nxt1;Phax;Pnpt1;Pom121;Qk;Ranbp2;Seh1l;Senp2;Thoc3;Thoc5;Thoc6;Tmem48;Tst;Xpot
Module4_pips1	macromolecular_complex_assembly	1.1699e-05	0.00037781	14143	604	2467	146	1.38576	Acadl;Acadm;Acads;Acat1;Aifm1;Ak3;Akap2;Alad;Amfr;Ap1b1;Ap2b1;Asf1a;Asf1b;Atf1;Atl2;Atxn2;Aurkb;Axin1;Bcl10;Bid;Cat;Cep57;Cirbp;Clint1;Cnot7;Col1a2;Cox15;Cpsf6;Cpsf7;Crnkl1;Cryab;Cuta;Cyba;Dcxr;Ddx6;Dhps;Dhrs4;Diap1;Dnm1l;Dync1h1;Ect2;Ehd4;Eid2;Eps15;Evl;Fam103a1;Gemin6;Gja1;Gls;Grb2;Grhpr;H1f0;H2afj;H2afv;H2afy2;Hells;Hes1;Higd2a;Hip1;Hist1h2af;Hmgcr;Hp1bp3;Ide;Irak1;Kctd10;Kctd15;Kctd20;Kctd3;K…
Module4_pips1	regulation_of_cell_cycle_process	1.85954e-05	0.000593538	14143	272	2467	75	1.58076	Anapc4;Aurkb;Bcl2l1;Bid;Brca1;Brd4;Brd7;Bre;Bub1;Camk2d;Ccnf;Cdc23;Cdc26;Cdc6;Cdca5;Cdk11b;Chek1;Chfr;Chordc1;Crlf3;Csnk2a2;Cul4a;Dgkz;Dtl;Dync1li1;E2f1;Ecd;Ect2;Ercc3;Foxm1;Fzr1;Hmga2;Ilkap;Ints3;Ints7;Kif23;Mad2l2;Mapk14;Mapkapk2;Med25;Msh2;Nbn;Nme6;Nusap1;Paf1;Pkn2;Pkp4;Plk4;Prcc;Prkaca;Psmg2;Ptpn11;Racgap1;Rassf1;Rbm38;Rfwd3;Rnf4;Rock2;Rrp8;Senp6;Smc1a;Smc3;Smc5;Stag2;Terf1;Timeless;Tiprl;Top…
Module4_pips1	DNA_replication	2.26821e-05	0.000715659	14143	146	2467	46	1.80625	Apitd1;Baz1a;Brca1;Ccne2;Cdc45;Cdc6;Chaf1a;Chtf18;Chtf8;Cinp;Dnaja3;Dtl;Fen1;Gins1;Gins2;Gins4;Lrwd1;Mcmbp;Myst2;Nup98;Orc2;Orc3;Orc4;Orc5;Orc6;Pinx1;Pola2;Polb;Pold1;Pold3;Pole;Pole2;Polg;Prim1;Prim2;Rad51;Rbms1;Rev1;Rfc1;Rfc3;Terf1;Tnfaip1;Top1;Top2b;Upf1;Wrnip1
Module4_pips1	intracellular_protein_transport	2.30922e-05	0.000720318	14143	352	2467	92	1.49836	1500003O03Rik;Agap3;Ahcyl1;Aip;Ap1b1;Ap1g1;Ap1m1;Ap1s2;Ap2a2;Ap2b1;Ap3b1;Ap3d1;Ap3m1;Arfip1;Arfrp1;Bcap29;Bid;Cep57;Copg2;Dag1;Derl1;Exoc4;Fam53a;Fxc1;Gas6;Gga1;Gga2;Golga4;Hdac6;Hes1;Hgs;Ing1;Ipo13;Ipo9;Jun;Kif13a;Kpna1;Kpna3;Mgea5;Mrpl45;Nfkbia;Nup54;Nup98;Nxt1;Os9;Pex14;Pex19;Pex5;Pex7;Pick1;Pola2;Ppp3r1;Pttg1ip;Rab10;Rab6a;Rab8b;Rbm22;Sar1b;Scamp3;Sec23a;Sec23b;Smurf1;Snx1;Snx9;Srp54a;Stat3;S…
Module4_pips1	regulation_of_metabolic_process	2.41929e-05	0.000746173	14143	3671	2467	722	1.12752	0610031J06Rik;1500003O03Rik;2410022L05Rik;2610301G19Rik;2810002N01Rik;5033414D02Rik;Abhd5;Abi1;Abl2;Abt1;Acadl;Acadm;Acadvl;Aco1;Acsl5;Adam9;Adap1;Aff4;Agrn;Ahcyl1;Aida;Aifm1;Aimp2;Aip;Akirin2;Akt2;Alkbh3;Ankrd27;Anxa3;Aph1a;Araf;Areg;Arfgap2;Arhgap1;Arhgdig;Arid1a;Arl2;Arl2bp;Arnt;Arrb2;Asap2;Asf1a;Asf1b;Asxl1;Atad1;Atad2;Atf1;Atf5;Atf6b;Atg4b;Atp6ap2;Atxn2;Atxn7l3;Aurka;Aurkb;Axin1;Azin1;Bad;Ba…
Module4_pips1	protein_modification_by_small_protein_conjugation_or_removal	2.50049e-05	0.000762651	14143	348	2467	91	1.49911	Amfr;Anapc1;Anapc11;Anapc16;Anapc2;Anapc4;Anapc7;Arih1;Arih2;Arrb2;Asxl1;Atg3;Atxn7l3;Axin1;Bap1;Bmi1;Brap;Brca1;Cand1;Ccnf;Cdc23;Cdc26;Chfr;Ctr9;Cyhr1;Dtl;Fbxl3;Fbxo22;Fbxo6;Fbxw11;Fbxw5;Hdac6;Hectd1;Josd2;Kcmf1;Nub1;Os9;Otud5;Paf1;Pcnp;Pja1;Ppil2;Ranbp2;Rbbp6;Rfwd3;Rnf13;Rnf20;Rnf25;Rnf4;Rnf40;Rnf5;Rybp;Senp2;Senp6;Siah1b;Skp2;Smurf1;Suz12;Tnfaip1;Topors;Traf4;Trim24;Trim27;Trpc4ap;Tsg101;Ube2d…
Module4_pips1	mRNA_transport	2.77071e-05	0.00083578	14143	67	2467	26	2.2247	Casc3;Ddx19a;Fmr1;Fyttd1;Khsrp;Magohb;Ncbp1;Ncbp2;Nup107;Nup160;Nup188;Nup37;Nup43;Nup50;Nup54;Nupl1;Nxt1;Pom121;Qk;Ranbp2;Seh1l;Senp2;Thoc3;Thoc5;Thoc6;Tmem48
Module5_pips1	cellular_process	2.66829e-34	5.35793e-31	14143	8865	1371	1060	1.23348	0610009D07Rik;0610010K14Rik;1190003J15Rik;2310016M24Rik;2700060E02Rik;Aaas;Aars;Aatf;Abcf1;Acin1;Acly;Aco2;Acot7;Acsbg1;Actl6a;Actn1;Actr2;Actr3;Adam23;Add1;Adipor1;Adk;Adprh;Adrm1;Adsl;Adss;Aebp2;Aen;Aes;Agfg1;Ahctf1;Ahcy;Aim2;Aimp1;Ak2;Akap12;Akr1b3;Akr7a5;Akt1;Akt1s1;Aldh18a1;Alg13;Alyref;Amotl2;Anapc13;Anapc5;Anln;Ano1;Anxa1;Anxa7;Ap1s1;Ap2a1;Ap3s1;Apex1;Api5;Aplp1;Aplp2;Apoe;App;Arcn1;Arf3;A…
Module5_pips1	cellular_metabolic_process	1.12351e-32	1.12801e-29	14143	5514	1371	741	1.38629	0610009D07Rik;1190003J15Rik;2700060E02Rik;Aars;Abcf1;Acin1;Acly;Aco2;Acot7;Acsbg1;Actl6a;Adipor1;Adk;Adprh;Adrm1;Adsl;Adss;Aebp2;Aes;Ahctf1;Ahcy;Ak2;Akap12;Akr1b3;Akr7a5;Akt1;Aldh18a1;Alg13;Alyref;Anapc13;Anapc5;Anxa1;Apex1;Aplp1;Apoe;App;Arid5b;Arl1;Ash2l;Asna1;Ass1;Atic;Atp1b3;Atp2a2;Atp2c1;Atp5g1;Atp5j;Atp5j2;Atp5k;Atp6v0b;Atp6v0c;Atp6v0d1;Atp6v1g1;Aurkaip1;Avpi1;B2m;BC048355;Bag1;Bag6;Bcas2;B…
Module5_pips1	metabolic_process	3.63839e-28	2.4353e-25	14143	6288	1371	802	1.31573	0610009D07Rik;1190003J15Rik;2700060E02Rik;Aars;Abcf1;Acat2;Acin1;Acly;Aco2;Acot7;Acsbg1;Actl6a;Adam23;Add1;Adipor1;Adk;Adprh;Adrm1;Adsl;Adss;Aebp2;Aes;Ahctf1;Ahcy;Ak2;Akap12;Akr1b3;Akr7a5;Akt1;Aldh18a1;Aldh7a1;Alg13;Alyref;Anapc13;Anapc5;Anxa1;Apex1;Aplp1;Aplp2;Apoe;App;Arid5b;Arl1;Asah1;Ash2l;Asna1;Ass1;Atic;Atp1b3;Atp2a2;Atp2c1;Atp5g1;Atp5j;Atp5j2;Atp5k;Atp6v0b;Atp6v0c;Atp6v0d1;Atp6v1g1;Aurkaip…
Module5_pips1	primary_metabolic_process	1.62391e-20	8.15201e-18	14143	5545	1371	698	1.29855	0610009D07Rik;1190003J15Rik;2700060E02Rik;Aars;Abcf1;Acin1;Acly;Acot7;Acsbg1;Actl6a;Adam23;Adipor1;Adk;Adprh;Adrm1;Adsl;Adss;Aebp2;Aes;Ahctf1;Ahcy;Ak2;Akr1b3;Akt1;Aldh18a1;Alg13;Alyref;Anapc13;Anapc5;Anxa1;Apex1;Aplp1;Aplp2;Apoe;App;Arid5b;Arl1;Asah1;Ash2l;Asna1;Ass1;Atic;Atp1b3;Atp2a2;Atp2c1;Atp5g1;Atp5j;Atp5j2;Atp5k;Atp6v0b;Atp6v0c;Atp6v0d1;Atp6v1g1;Avpi1;B2m;BC048355;Bag1;Bag6;Bcas2;Bcat1;Bcat…
Module5_pips1	electron_transport_chain	3.15115e-20	1.15273e-17	14143	108	1371	47	4.4893	Cmah;Cyb5;Cyc1;Dld;Etfa;Fads2;Mybbp1a;Ndufa1;Ndufa10;Ndufa12;Ndufa13;Ndufa2;Ndufa3;Ndufa5;Ndufa6;Ndufa8;Ndufa9;Ndufab1;Ndufb10;Ndufb11;Ndufb2;Ndufb3;Ndufb5;Ndufb6;Ndufb7;Ndufb8;Ndufb9;Ndufc2;Ndufs1;Ndufs2;Ndufs3;Ndufs5;Ndufs6;Ndufs7;Ndufs8;Ndufv1;Ndufv2;Ndufv3;Sdha;Sdhb;Sdhc;Sdhd;Txn2;Uqcrc1;Uqcrc2;Uqcrfs1;Uqcrq
Module5_pips1	generation_of_precursor_metabolites_and_energy	3.44441e-20	1.15273e-17	14143	214	1371	69	3.32613	Aco2;Adsl;Akt1;Bloc1s1;Cmah;Cs;Cyb5;Cyc1;Dld;Dlst;Etfa;Fads2;Idh2;Idh3a;Idh3b;Idh3g;Ldhb;Mdh1;Mtfr1;Mybbp1a;Ndufa1;Ndufa10;Ndufa12;Ndufa13;Ndufa2;Ndufa3;Ndufa5;Ndufa6;Ndufa8;Ndufa9;Ndufab1;Ndufb10;Ndufb11;Ndufb2;Ndufb3;Ndufb5;Ndufb6;Ndufb7;Ndufb8;Ndufb9;Ndufc2;Ndufs1;Ndufs2;Ndufs3;Ndufs5;Ndufs6;Ndufs7;Ndufs8;Ndufv1;Ndufv2;Ndufv3;Pdha1;Pdhb;Pfkl;Pfkp;Ppp1cc;Ptges3;Sdha;Sdhb;Sdhc;Sdhd;Sucla2;Suclg1…
Module5_pips1	cellular_nitrogen_compound_metabolic_process	1.06409e-19	3.0524e-17	14143	2988	1371	425	1.46728	0610009D07Rik;1190003J15Rik;2700060E02Rik;Aars;Acin1;Actl6a;Adk;Adrm1;Adsl;Adss;Aebp2;Aes;Ahctf1;Ak2;Alyref;Apex1;Aplp1;App;Arid5b;Arl1;Ash2l;Asna1;Ass1;Atic;Atp1b3;Atp2a2;Atp2c1;Atp5g1;Atp5j;Atp5j2;Atp5k;Atp6v0b;Atp6v0c;Atp6v0d1;Atp6v1g1;BC048355;Bcas2;Bccip;Bclaf1;Bhlhe40;Birc5;Blvra;Blvrb;Bop1;Bzw2;Cad;Carm1;Cars;Ccne1;Ccnl1;Ccrn4l;Cdca7;Cdk9;Cdkn2a;Cdt1;Cebpd;Celf1;Cenpa;Cenpv;Chaf1b;Chd4;Chm…
Module5_pips1	nitrogen_compound_metabolic_process	2.61996e-19	6.57609e-17	14143	3074	1371	433	1.45308	0610009D07Rik;1190003J15Rik;2700060E02Rik;Aars;Acin1;Actl6a;Adk;Adrm1;Adsl;Adss;Aebp2;Aes;Ahctf1;Ak2;Akr1b3;Akr7a5;Alyref;Apex1;Aplp1;App;Arid5b;Arl1;Ash2l;Asna1;Ass1;Atic;Atp1b3;Atp2a2;Atp2c1;Atp5g1;Atp5j;Atp5j2;Atp5k;Atp6v0b;Atp6v0c;Atp6v0d1;Atp6v1g1;BC048355;Bcas2;Bccip;Bclaf1;Bgn;Bhlhe40;Birc5;Blvra;Blvrb;Bop1;Bzw2;Cad;Carm1;Cars;Ccnd3;Ccne1;Ccnl1;Ccrn4l;Cd44;Cdca7;Cdk9;Cdkn2a;Cdt1;Cebpd;Celf…
Module5_pips1	nucleobase-containing_compound_metabolic_process	3.53779e-19	7.8932e-17	14143	2863	1371	409	1.47369	0610009D07Rik;1190003J15Rik;2700060E02Rik;Aars;Acin1;Actl6a;Adk;Adrm1;Adsl;Adss;Aebp2;Aes;Ahctf1;Ak2;Alyref;Apex1;Aplp1;App;Arid5b;Arl1;Ash2l;Asna1;Atic;Atp1b3;Atp2a2;Atp2c1;Atp5g1;Atp5j;Atp5j2;Atp5k;Atp6v0b;Atp6v0c;Atp6v0d1;Atp6v1g1;BC048355;Bcas2;Bccip;Bclaf1;Bhlhe40;Birc5;Bop1;Bzw2;Cad;Carm1;Cars;Ccne1;Ccnl1;Ccrn4l;Cdca7;Cdk9;Cdkn2a;Cdt1;Cebpd;Celf1;Cenpa;Cenpv;Chaf1b;Chd4;Chmp1a;Churc1;Cmah;C…
Module5_pips1	RNA_splicing	7.40387e-17	1.4867e-14	14143	215	1371	64	3.07076	0610009D07Rik;Alyref;Bcas2;Celf1;Cwc15;D10Wsu52e;Ddx39;Dhx15;Eftud2;Eif4a3;Hnrnpc;Isy1;Lsm2;Lsm4;Lsm5;Magoh;Naa38;Phf5a;Plrg1;Pnn;Ppie;Ppih;Ppil1;Ppp1r8;Prmt5;Prpf19;Prpf31;Prpf40a;Prpf8;Psip1;Puf60;Rbm17;Rbm39;Rbmxl1;Rnps1;Sf1;Sf3a3;Sf3b1;Sf3b3;Sf3b4;Snrnp25;Snrnp40;Snrpa;Snrpa1;Snrpc;Snrpd1;Snrpf;Snw1;Son;Srrm1;Srrm2;Srsf1;Srsf10;Srsf3;Srsf7;Srsf9;Strap;Syncrip;Tardbp;Thoc7;Tra2a;Tra2b;Tsen34;W…
Module5_pips1	RNA_processing	1.34856e-16	2.46174e-14	14143	478	1371	106	2.28761	0610009D07Rik;Aars;Alyref;Aplp1;App;Bcas2;Bop1;Ccnl1;Cdkn2a;Celf1;Cwc15;D10Wsu52e;Dcaf13;Ddx1;Ddx39;Ddx54;Dhx15;Dkc1;Eftud2;Eif4a3;Emg1;Exosc10;Exosc3;Exosc8;Fcf1;Ftsj3;Gar1;Hnrnpc;Hnrpll;Imp3;Isy1;Lsm2;Lsm4;Lsm5;Magoh;Naa38;Nhp2;Nob1;Nop10;Nop14;Npm3;Nsa2;Nsun2;Nudt21;Pa2g4;Pabpn1;Papola;Pes1;Phf5a;Plrg1;Pnn;Ppie;Ppih;Ppil1;Ppp1r8;Prmt5;Prpf19;Prpf31;Prpf40a;Prpf8;Psip1;Puf60;Rbm17;Rbm39;Rbmxl1;…
Module5_pips1	mRNA_processing	1.6762e-15	2.80485e-13	14143	281	1371	73	2.67991	0610009D07Rik;Alyref;Aplp1;App;Bcas2;Celf1;Cwc15;Ddx1;Ddx39;Dhx15;Eftud2;Eif4a3;Hnrnpc;Hnrpll;Isy1;Lsm2;Lsm4;Lsm5;Magoh;Naa38;Nudt21;Pabpn1;Papola;Phf5a;Plrg1;Pnn;Ppie;Ppih;Ppil1;Ppp1r8;Prmt5;Prpf19;Prpf31;Prpf40a;Prpf8;Psip1;Puf60;Rbm17;Rbm39;Rbmxl1;Rnps1;Sf1;Sf3a3;Sf3b1;Sf3b3;Sf3b4;Slbp;Snrnp25;Snrnp40;Snrpa;Snrpa1;Snrpc;Snrpd1;Snrpf;Snw1;Son;Srrm1;Srrm2;Srsf1;Srsf10;Srsf3;Srsf7;Srsf9;Ssu72;Str…
Module5_pips1	mRNA_metabolic_process	2.37962e-15	3.67559e-13	14143	326	1371	80	2.53149	0610009D07Rik;Alyref;Aplp1;App;Bcas2;Ccrn4l;Celf1;Cwc15;Ddx1;Ddx39;Dhx15;Dnajb11;Eftud2;Eif4a3;Etf1;Exosc10;Exosc3;Gspt1;Hnrnpc;Hnrpdl;Hnrpll;Isy1;Lsm2;Lsm4;Lsm5;Magoh;Naa38;Nudt21;Pabpn1;Papola;Phf5a;Plrg1;Pnn;Ppie;Ppih;Ppil1;Ppp1r8;Prmt5;Prpf19;Prpf31;Prpf40a;Prpf8;Psip1;Puf60;Rbm17;Rbm39;Rbmxl1;Rnps1;Sf1;Sf3a3;Sf3b1;Sf3b3;Sf3b4;Slbp;Snrnp25;Snrnp40;Snrpa;Snrpa1;Snrpc;Snrpd1;Snrpf;Snw1;Son;Srrm…
Module5_pips1	cell_cycle	3.73831e-15	5.36181e-13	14143	781	1371	145	1.91523	Actr2;Actr3;Ahctf1;Akt1;Anapc13;Anapc5;Anln;Anxa1;App;Arpp19;Avpi1;Bag6;Bccip;Birc5;Bub3;Calm3;Ccna2;Ccnb1;Ccnb2;Ccnd1;Ccnd3;Ccne1;Ccng1;Cdc16;Cdc20;Cdc34;Cdca3;Cdca8;Cdkn1a;Cdkn2a;Cdt1;Cenpa;Cenpv;Cetn3;Chaf1b;Chd3;Chmp1a;Cks2;Cltc;Csnk1a1;Csnk1d;Csnk2a1;Cul3;Cul4b;D2Ertd750e;Dbf4;Dctn2;Dctn3;Dnajc2;E2f4;Ehmt2;Eif4e;Ensa;Ezh2;Fbxo5;Foxo4;Gadd45a;Gmnn;Gnai3;H2afx;Hdac3;Hjurp;Hras1;Ilk;Incenp;Khdr…
Module5_pips1	macromolecule_metabolic_process	3.72934e-14	4.99234e-12	14143	4465	1371	558	1.28919	0610009D07Rik;2700060E02Rik;Aars;Abcf1;Acin1;Actl6a;Adam23;Add1;Adprh;Adrm1;Aebp2;Aes;Ahctf1;Akt1;Alyref;Anapc13;Anapc5;Anxa1;Apex1;Aplp1;Apoe;App;Arid5b;Ash2l;Avpi1;B2m;Bag1;Bag6;Bcas2;Bccip;Bclaf1;Bgn;Bhlhe40;Birc5;Bloc1s1;Bnip3l;Bop1;Bzw2;C1ra;Cad;Canx;Capn2;Carm1;Cars;Ccnb1;Ccnd1;Ccnd3;Ccne1;Ccnl1;Ccrn4l;Cd44;Cd81;Cdc16;Cdc20;Cdc34;Cdca7;Cdk9;Cdkn2a;Cdt1;Cebpd;Celf1;Cenpa;Cenpv;Chaf1b;Chd4;Ch…
Module5_pips1	cellular_macromolecule_metabolic_process	4.33125e-14	5.43572e-12	14143	4112	1371	521	1.30704	0610009D07Rik;2700060E02Rik;Aars;Abcf1;Acin1;Actl6a;Adprh;Adrm1;Aebp2;Aes;Ahctf1;Akt1;Alyref;Anapc13;Anapc5;Anxa1;Apex1;Aplp1;Apoe;App;Arid5b;Ash2l;Avpi1;B2m;Bag1;Bag6;Bcas2;Bccip;Bclaf1;Bgn;Bhlhe40;Birc5;Bloc1s1;Bnip3l;Bop1;Bzw2;Cad;Canx;Carm1;Cars;Ccnb1;Ccnd1;Ccnd3;Ccne1;Ccnl1;Ccrn4l;Cd81;Cdc16;Cdc20;Cdc34;Cdca7;Cdk9;Cdkn2a;Cdt1;Cebpd;Celf1;Cenpa;Cenpv;Chaf1b;Chd4;Chmp1a;Churc1;Clk1;Clpp;Cltc;C…
Module5_pips1	gene_expression	5.80616e-13	6.85809e-11	14143	2319	1371	322	1.43238	0610009D07Rik;2700060E02Rik;Aars;Abcf1;Actl6a;Adrm1;Aebp2;Aes;Ahctf1;Akt1;Alyref;Apex1;Aplp1;App;Arid5b;Ash2l;Bcas2;Bclaf1;Bhlhe40;Birc5;Bop1;Capn2;Carm1;Cars;Ccnl1;Cdca7;Cdk9;Cdkn2a;Cebpd;Celf1;Chaf1b;Chd4;Chmp1a;Churc1;Cpe;Csnk2a1;Ctbp1;Ctcf;Ctnnd1;Cwc15;D10Wsu52e;Dars;Dcaf13;Ddost;Ddx1;Ddx17;Ddx39;Ddx54;Denr;Dhcr24;Dhx15;Dkc1;Dnajc2;Dnmt1;Dnttip2;Dpy30;Drap1;E2f4;Eed;Eef1e1;Eftud2;Egr1;Ehf;Eif…
Module5_pips1	cellular_component_biogenesis	6.77496e-13	7.55785e-11	14143	1076	1371	176	1.68735	2310016M24Rik;Aatf;Actn1;Add1;Adrm1;Adsl;Agfg1;Ahctf1;Anxa5;Apoa1bp;Apoe;App;Arpc4;Bag6;Bop1;Cald1;Capg;Ccnb1;Ccrn4l;Cd9;Cdkn2a;Celf1;Cenpa;Cenpv;Chaf1b;Clpp;Cltc;Coro1c;Csnk1d;Ctcf;Ctnna1;Ctsd;Cul3;Cyfip1;Dbnl;Dcaf13;Dkc1;Dpysl3;E2f4;Ehd1;Ehmt2;Eif2a;Eif3a;Eif4a3;Eif6;Emg1;Exosc10;Exosc3;Exosc8;Ezr;Fbxo5;Fcf1;Ftsj3;Gar1;Glul;Gmnn;Gnl2;Gnl3;Gsn;Gtf2a2;H2-Ke2;H2afx;H2afy;Hdac3;Hjurp;Hmox1;Hprt;Hra…
Module5_pips1	oxidation-reduction_process	9.07458e-13	9.5904e-11	14143	682	1371	125	1.89073	Aco2;Adipor1;Adsl;Akr1b3;Akr7a5;Akt1;Aldh18a1;Aldh7a1;Apex1;Bloc1s1;Blvra;Blvrb;Cmah;Cox7a2;Cox7a2l;Cox7b;Cs;Ctbp1;Cyb5;Cyb5r3;Cyc1;Degs1;Dhcr24;Dld;Dlst;Dohh;Echs1;Eci2;Etfa;Fads2;Fasn;Glrx5;Glud1;Glyr1;Gsr;Gsto1;Hadh;Hibadh;Hmox1;Hsd17b10;Hsd17b12;Idh2;Idh3a;Idh3b;Idh3g;Ifi30;Impdh2;Ldhb;Mdh1;Mtfr1;Mthfd1;Mthfd1l;Mthfd2;Mybbp1a;Ndufa1;Ndufa10;Ndufa12;Ndufa13;Ndufa2;Ndufa3;Ndufa5;Ndufa6;Ndufa8;N…
Module5_pips1	translation	1.02599e-12	1.03009e-10	14143	389	1371	84	2.22758	Aars;Abcf1;Akt1;Cars;Dars;Ddost;Denr;Eef1e1;Eftud2;Eif1a;Eif1ax;Eif2a;Eif2b5;Eif2d;Eif2s1;Eif2s3x;Eif3a;Eif3b;Eif3f;Eif3g;Eif4a3;Eif4e;Eif4e2;Eif4h;Eif5;Eif6;Elof1;Eprs;Etf1;Farsa;Farsb;Galnt1;Ganab;Gspt1;Hars;Iars;Ict1;Krtcap2;Lars;Mars;Mrpl11;Mrpl12;Mrpl13;Mrpl15;Mrpl17;Mrpl2;Mrpl20;Mrpl21;Mrpl22;Mrpl24;Mrpl28;Mrpl3;Mrpl33;Mrpl34;Mrpl36;Mrpl37;Mrpl4;Mrpl9;Mrps15;Mrps16;Mrps17;Mrps18b;Mrps21;Mrp…
Module5_pips1	cellular_component_organization_or_biogenesis	4.5679e-12	4.36778e-10	14143	2691	1371	359	1.37621	0610010K14Rik;2310016M24Rik;Aatf;Acin1;Actl6a;Actn1;Actr2;Actr3;Add1;Adrm1;Adsl;Aebp2;Agfg1;Ahctf1;Akt1;Akt1s1;Anapc13;Anapc5;Anln;Anxa5;Anxa7;Aplp1;Aplp2;Apoa1bp;Apoe;App;Arl1;Arpc1a;Arpc1b;Arpc3;Arpc4;Arpc5;Arpp19;Ash2l;Atp2c1;Atp6v0c;Atxn10;Bag6;Bak1;Birc5;Bnip3l;Bop1;Bub3;Cald1;Capg;Capza2;Carm1;Ccna2;Ccnb1;Ccnb2;Ccng1;Ccrn4l;Cd24a;Cd44;Cd9;Cdc16;Cdc20;Cdca3;Cdca8;Cdkn2a;Celf1;Cenpa;Cenpv;Cet…
Module5_pips1	cellular_component_organization_or_biogenesis_at_cellular_level	5.58537e-12	5.09792e-10	14143	2243	1371	309	1.42113	0610010K14Rik;2310016M24Rik;Aatf;Acin1;Actl6a;Actn1;Actr2;Actr3;Add1;Adrm1;Aebp2;Agfg1;Ahctf1;Akt1;Anapc13;Anapc5;Anln;Aplp1;Aplp2;Apoe;App;Arl1;Arpc4;Arpp19;Ash2l;Atp2c1;Atp6v0c;Atxn10;Bag6;Bak1;Birc5;Bnip3l;Bop1;Bub3;Cald1;Capg;Capza2;Carm1;Ccna2;Ccnb1;Ccnb2;Ccng1;Ccrn4l;Cd24a;Cd44;Cd9;Cdc16;Cdc20;Cdca3;Cdca8;Cdkn2a;Celf1;Cenpa;Cenpv;Cetn3;Chaf1b;Chchd3;Chd3;Chd4;Chmp1a;Cltc;Coro1b;Coro1c;Csnk1…
Module5_pips1	ribonucleoprotein_complex_biogenesis	1.5959e-11	1.39329e-09	14143	199	1371	52	2.69559	Aatf;Bop1;Ccrn4l;Cdkn2a;Celf1;Dcaf13;Dkc1;Eif2a;Eif3a;Eif4a3;Eif6;Emg1;Exosc10;Exosc3;Exosc8;Fcf1;Ftsj3;Gar1;Gnl2;Gnl3;Imp3;Ipo4;Lsm14a;Lsm2;Mrto4;Nhp2;Nmd3;Nob1;Nop10;Nop14;Nop58;Npm3;Nsa2;Pa2g4;Pes1;Pih1d1;Prmt5;Prpf19;Prpf31;Psip1;Pum2;Rbmxl1;Rpf1;Rrp1;Rrp9;Rrs1;Sbds;Snrpc;Srsf1;Srsf10;Tsr1;Utp11l
Module5_pips1	nucleic_acid_metabolic_process	2.97641e-11	2.49026e-09	14143	2400	1371	323	1.38834	0610009D07Rik;2700060E02Rik;Aars;Acin1;Actl6a;Adrm1;Aebp2;Aes;Ahctf1;Alyref;Apex1;Aplp1;App;Arid5b;Ash2l;Bcas2;Bccip;Bclaf1;Bhlhe40;Birc5;Bop1;Bzw2;Carm1;Cars;Ccne1;Ccnl1;Ccrn4l;Cdca7;Cdk9;Cdkn2a;Cdt1;Cebpd;Celf1;Cenpa;Cenpv;Chaf1b;Chd4;Chmp1a;Churc1;Csnk2a1;Ctbp1;Ctcf;Ctnnd1;Cul4b;Cwc15;D10Wsu52e;Dars;Dbf4;Dcaf13;Ddx1;Ddx17;Ddx39;Ddx54;Dhx15;Dkc1;Dnajb11;Dnajc2;Dnmt1;Dnttip2;Dpy30;Drap1;E2f4;Eed…
Module5_pips1	small_molecule_metabolic_process	3.57318e-11	2.86997e-09	14143	1159	1371	180	1.60211	1190003J15Rik;Aars;Acly;Aco2;Acot7;Acsbg1;Adipor1;Adk;Adsl;Adss;Ahcy;Ak2;Akr1b3;Aldh18a1;Aplp2;Apoe;App;Arl1;Asna1;Ass1;Atic;Atp1b3;Atp2a2;Atp2c1;Atp5g1;Atp5j;Atp5j2;Atp5k;Atp6v0b;Atp6v0c;Atp6v0d1;Atp6v1g1;BC048355;Bcat1;Bcat2;Cad;Cars;Cmah;Crabp2;Cs;Ctps;Cyb5;Cyb5r3;Dars;Dcakd;Degs1;Dhcr24;Dld;Dlst;Dnmt1;Dohh;Dpysl3;Dtymk;Ech1;Echdc2;Echs1;Eci2;Enpp3;Eprs;Fabp5;Fads2;Farsa;Farsb;Fasn;Fdps;Galk1;…
Module5_pips1	organelle_organization	5.88371e-11	4.54403e-09	14143	1486	1371	218	1.51336	0610010K14Rik;2310016M24Rik;Acin1;Actl6a;Actn1;Actr2;Add1;Aebp2;Agfg1;Ahctf1;Akt1;Anapc13;Anapc5;Anln;Arl1;Arpc4;Arpp19;Ash2l;Atp2c1;Atp6v0c;Bag6;Bak1;Birc5;Bnip3l;Bub3;Cald1;Capza2;Carm1;Ccna2;Ccnb1;Ccnb2;Ccng1;Cd24a;Cdc16;Cdc20;Cdca3;Cdca8;Cdkn2a;Cenpa;Cenpv;Cetn3;Chaf1b;Chchd3;Chd3;Chd4;Chmp1a;Cltc;Coro1b;Coro1c;Csnk1a1;Csnk1d;Csrp1;Ctbp1;Ctcf;Ctsd;Cul3;D2Ertd750e;Dap3;Dbnl;Dctn2;Dctn3;Dnajb6;…
Module5_pips1	cellular_component_biogenesis_at_cellular_level	6.23828e-11	4.63943e-09	14143	212	1371	53	2.57896	Aatf;Bop1;Ccrn4l;Cdkn2a;Celf1;Dcaf13;Dkc1;Eif2a;Eif3a;Eif4a3;Eif6;Emg1;Exosc10;Exosc3;Exosc8;Fcf1;Ftsj3;Gar1;Gnl2;Gnl3;Imp3;Ipo4;Lsm14a;Lsm2;Mrto4;Nhp2;Nmd3;Nob1;Nop10;Nop14;Nop58;Npm3;Nsa2;Pa2g4;Pes1;Pih1d1;Prmt5;Prpf19;Prpf31;Psip1;Pum2;Rbmxl1;Rpf1;Rrp1;Rrp9;Rrs1;Sbds;Snrpc;Spnb2;Srsf1;Srsf10;Tsr1;Utp11l
Module5_pips1	heterocycle_metabolic_process	7.49146e-11	5.37244e-09	14143	544	1371	101	1.91525	1190003J15Rik;Adk;Adsl;Adss;Ak2;Aldh18a1;Arl1;Asna1;Atic;Atp1b3;Atp2a2;Atp2c1;Atp5g1;Atp5j;Atp5j2;Atp5k;Atp6v0b;Atp6v0c;Atp6v0d1;Atp6v1g1;Blvra;Blvrb;Cad;Ctps;Dcakd;Dld;Dlst;Dnmt1;Dpysl3;Dtymk;Gart;Glyr1;Gnai3;Gnl2;Gnl3;Guk1;Hibadh;Hmox1;Hprt;Hras1;Idh3a;Idh3b;Idh3g;Impdh2;Itpa;Ldhb;Macf1;Mapk1;Mat2a;Mdh1;Mmadhc;Mras;Msh6;Mthfd1;Mthfd1l;Mthfd2;Myh9;Ndufs1;Nme1;Nme4;Nt5c;Nudt1;Ola1;Pcmt1;Pgd;Pgls;…
Module5_pips1	cellular_respiration	8.49596e-11	5.88272e-09	14143	65	1371	26	4.12633	Aco2;Adsl;Bloc1s1;Cs;Dld;Dlst;Idh2;Idh3a;Idh3b;Idh3g;Mdh1;Mtfr1;Mybbp1a;Ndufa5;Ndufb8;Ndufc2;Ndufs1;Ndufv2;Sdha;Sdhb;Sdhc;Sdhd;Sucla2;Suclg1;Tbrg4;Uqcrc1
Module5_pips1	cell_cycle_process	1.09996e-10	7.3624e-09	14143	555	1371	102	1.89588	Actr2;Actr3;Ahctf1;Akt1;Anapc13;Anapc5;Anln;App;Arpp19;Bag6;Birc5;Bub3;Ccna2;Ccnb1;Ccnb2;Ccnd1;Ccng1;Cdc16;Cdc20;Cdca3;Cdca8;Cdkn1a;Cdkn2a;Cenpa;Cenpv;Cetn3;Chd3;Chmp1a;Cks2;Cltc;Csnk1a1;Csnk1d;Cul3;D2Ertd750e;Dbf4;Dctn2;Dctn3;Dnajc2;E2f4;Ehmt2;Eif4e;Ensa;Ezh2;Fbxo5;Foxo4;Gadd45a;H2afx;Hdac3;Hras1;Ilk;Incenp;Lmnb1;Macf1;Mad2l1;Mdm2;Mki67;Msh6;Mybl2;Myh9;Ncapd2;Nsun2;Pafah1b1;Pcbp4;Pes1;Plk1;Plk2;…
Module5_pips1	aerobic_respiration	1.88273e-10	1.21952e-08	14143	30	1371	17	5.84564	Aco2;Adsl;Bloc1s1;Cs;Dlst;Idh2;Idh3a;Idh3b;Idh3g;Mdh1;Mtfr1;Sdha;Sdhb;Sdhc;Sdhd;Sucla2;Suclg1
Module5_pips1	cellular_protein_metabolic_process	3.4645e-10	2.17397e-08	14143	2060	1371	280	1.40215	Aars;Abcf1;Actl6a;Adprh;Akt1;Anapc13;Anapc5;Anxa1;App;Ash2l;Avpi1;B2m;Bag1;Bag6;Bgn;Birc5;Bloc1s1;Bnip3l;Cad;Canx;Carm1;Cars;Ccnb1;Ccnd1;Ccnd3;Ccne1;Cd81;Cdc16;Cdc20;Cdc34;Cdk9;Cdkn2a;Clk1;Clpp;Cops2;Cops3;Cops4;Cops5;Cops6;Cops7a;Cops8;Csnk1a1;Csnk1d;Csnk1g2;Csnk2a1;Cul1;Cul3;Cul4b;Dars;Dbf4;Ddost;Denr;Dnaja2;Dnajb11;Dnajb6;Dnajc7;Dnajc8;Dohh;Dpm3;Dpy30;Dusp14;Eed;Eef1e1;Eftud2;Ehmt2;Eif1a;Eif1a…
Module5_pips1	tricarboxylic_acid_cycle	3.67413e-10	2.23565e-08	14143	21	1371	14	6.87722	Aco2;Cs;Dlst;Idh2;Idh3a;Idh3b;Idh3g;Mdh1;Sdha;Sdhb;Sdhc;Sdhd;Sucla2;Suclg1
Module5_pips1	nucleobase-containing_small_molecule_metabolic_process	8.81686e-10	4.99319e-08	14143	500	1371	92	1.89811	1190003J15Rik;Adk;Adsl;Adss;Ak2;Arl1;Asna1;Atic;Atp1b3;Atp2a2;Atp2c1;Atp5g1;Atp5j;Atp5j2;Atp5k;Atp6v0b;Atp6v0c;Atp6v0d1;Atp6v1g1;BC048355;Cad;Cmah;Ctps;Dcakd;Dlst;Dnmt1;Dpysl3;Dtymk;Enpp3;Gart;Glyr1;Gnai3;Gnl2;Gnl3;Guk1;Hibadh;Hprt;Hras1;Idh3a;Idh3b;Idh3g;Impdh2;Itpa;Ldhb;Macf1;Mapk1;Mat2a;Mdh1;Mras;Msh6;Mthfd1;Myh9;Ndufs1;Nme1;Nme4;Nt5c;Nudt1;Ola1;Pcmt1;Pgd;Pgls;Pnp;Ppp2r4;Prdx5;Prps1;Psmc2;Rab1…
Module5_pips1	catabolic_process	8.9529e-10	4.99319e-08	14143	1096	1371	167	1.57185	Aco2;Acot7;Adss;Ahcy;Akt1;Apoe;Arl1;Asna1;Atp2a2;Atp2c1;Atp5j;Atp5j2;Atp5k;Atp6v0b;Atp6v0c;Atp6v0d1;Atp6v1g1;BC048355;Bag6;Bcat1;Bcat2;Blvra;Blvrb;Bnip3l;Ccrn4l;Cd44;Cdc20;Cdc34;Cdkn2a;Clpp;Cpe;Cs;Ctsd;Cul1;Cul3;Cul4b;Dhcr24;Dlst;Dpysl3;Echs1;Eci2;Ei24;Eif4a3;Enpp3;Ephx1;Etf1;Exosc10;Exosc3;Fis1;Gcsh;Glud1;Glyr1;Gnai3;Gnl2;Gnl3;Got2;Gspt1;Gsto1;Hadh;Hibadh;Hmox1;Hprt;Hras1;Huwe1;Idh2;Idh3a;Idh3b;…
Module5_pips1	protein_metabolic_process	9.03636e-10	4.99319e-08	14143	2414	1371	317	1.35465	Aars;Abcf1;Actl6a;Adam23;Adprh;Akt1;Anapc13;Anapc5;Anxa1;App;Ash2l;Avpi1;B2m;Bag1;Bag6;Bgn;Birc5;Bloc1s1;Bnip3l;C1ra;Cad;Canx;Capn2;Carm1;Cars;Ccnb1;Ccnd1;Ccnd3;Ccne1;Cd81;Cdc16;Cdc20;Cdc34;Cdk9;Cdkn2a;Clk1;Clpp;Cops2;Cops3;Cops4;Cops5;Cops6;Cops7a;Cops8;Cpe;Csnk1a1;Csnk1d;Csnk1g2;Csnk2a1;Ctsa;Ctsd;Ctsl;Ctsz;Cul1;Cul3;Cul4b;Dars;Dbf4;Ddost;Denr;Dhcr24;Dld;Dnaja2;Dnajb11;Dnajb6;Dnajc7;Dnajc8;Dohh;…
Module5_pips1	acetyl-CoA_catabolic_process	9.2006e-10	4.99319e-08	14143	22	1371	14	6.56462	Aco2;Cs;Dlst;Idh2;Idh3a;Idh3b;Idh3g;Mdh1;Sdha;Sdhb;Sdhc;Sdhd;Sucla2;Suclg1
Module5_pips1	cell_cycle_phase	9.49151e-10	5.01551e-08	14143	449	1371	85	1.95289	Ahctf1;Akt1;Anapc13;Anapc5;Anln;App;Arpp19;Bag6;Birc5;Bub3;Ccna2;Ccnb1;Ccnb2;Ccnd1;Ccng1;Cdc16;Cdc20;Cdca3;Cdca8;Cdkn1a;Cdkn2a;Cenpv;Cetn3;Chd3;Chmp1a;Cks2;Cltc;Csnk1a1;Csnk1d;Cul3;D2Ertd750e;Dbf4;Dctn2;Dctn3;Dnajc2;E2f4;Ehmt2;Eif4e;Ensa;Ezh2;Fbxo5;Foxo4;H2afx;Hdac3;Incenp;Lmnb1;Mad2l1;Mdm2;Mki67;Msh6;Mybl2;Myh9;Ncapd2;Nsun2;Pafah1b1;Pes1;Plk1;Plk2;Ppp2r2d;Psmd13;Psrc1;Rad21;Rcc1;Rhoa;Rpa1;Rrs1;R…
Module5_pips1	cofactor_metabolic_process	1.0998e-09	5.65649e-08	14143	190	1371	47	2.55181	Acly;Aco2;Atic;Blvra;Blvrb;Cs;Dcakd;Dld;Dlst;Dnmt1;Gart;Glyr1;Hibadh;Hmox1;Idh2;Idh3a;Idh3b;Idh3g;Ldhb;Mat2a;Mdh1;Mmadhc;Mthfd1;Mthfd1l;Mthfd2;Pcmt1;Pdha1;Pdhb;Pgd;Pgls;Pnp;Prdx5;Qdpr;Scp2;Sdha;Sdhb;Sdhc;Sdhd;Slc25a39;Sucla2;Suclg1;Tkt;Tmem14c;Txnrd1;Urod;Vkorc1;Vnn3
Module5_pips1	cell_division	1.12679e-09	5.65649e-08	14143	357	1371	72	2.0805	Aatf;Actr2;Actr3;Ahctf1;Anapc13;Anapc5;Anln;Arpp19;Birc5;Bub3;Ccna2;Ccnb1;Ccnb2;Ccnd1;Ccnd3;Ccne1;Ccng1;Cdc16;Cdc20;Cdca3;Cdca7;Cdca8;Cdkn2a;Cenpv;Cetn3;Chmp1a;Cks2;Csnk1a1;Cul3;D2Ertd750e;Dctn3;Ensa;Fbxo5;Gnai3;Incenp;Lig1;Mad2l1;Maea;Mcm5;Myh9;Ncapd2;Nsun2;Pafah1b1;Pdcd6ip;Plk1;Ppp1cc;Ppp2r2d;Psrc1;Rab11a;Rad21;Rcc1;Rhoa;Rhoc;Ruvbl1;Sept11;Sept2;Sept5;Sept7;Sept9;Setd8;Smc4;Son;Spnb2;Stra13;Syc…
Module5_pips1	cofactor_catabolic_process	1.3814e-09	6.76549e-08	14143	33	1371	17	5.31421	Aco2;Blvra;Blvrb;Cs;Dlst;Hmox1;Idh2;Idh3a;Idh3b;Idh3g;Mdh1;Sdha;Sdhb;Sdhc;Sdhd;Sucla2;Suclg1
Module5_pips1	mitotic_cell_cycle	1.87191e-09	8.94951e-08	14143	361	1371	72	2.05745	Ahctf1;Akt1;Anapc13;Anapc5;Anln;App;Arpp19;Birc5;Bub3;Ccna2;Ccnb1;Ccnb2;Ccnd1;Ccng1;Cdc16;Cdc20;Cdca3;Cdca8;Cdkn1a;Cdkn2a;Cenpa;Cenpv;Cetn3;Chmp1a;Cltc;Csnk1a1;Cul3;D2Ertd750e;Dbf4;Dctn2;Dctn3;Dnajc2;E2f4;Eif4e;Ensa;Ezh2;Fbxo5;Foxo4;Incenp;Lmnb1;Mad2l1;Mdm2;Mybl2;Ncapd2;Nsun2;Pafah1b1;Pes1;Plk1;Plk2;Ppp2r2d;Psrc1;Rad21;Rcc1;Rhoa;Rnf2;Rrs1;Ruvbl1;Sept2;Sept7;Setd8;Smc4;Stra13;Taf10;Tcf3;Tfdp1;Tipi…
Module5_pips1	cellular_catabolic_process	2.0832e-09	9.72807e-08	14143	926	1371	145	1.61533	Aco2;Acot7;Adss;Ahcy;Apoe;Arl1;Asna1;Atp2a2;Atp2c1;Atp5j;Atp5j2;Atp5k;Atp6v0b;Atp6v0c;Atp6v0d1;Atp6v1g1;BC048355;Bag6;Bcat1;Bcat2;Blvra;Blvrb;Bnip3l;Ccrn4l;Cdc20;Cdc34;Cdkn2a;Clpp;Cpe;Cs;Ctsd;Cul1;Cul3;Cul4b;Dlst;Dpysl3;Echs1;Eci2;Ei24;Eif4a3;Enpp3;Ephx1;Etf1;Exosc10;Exosc3;Fis1;Gcsh;Glud1;Gnai3;Gnl2;Gnl3;Got2;Gspt1;Gsto1;Hadh;Hmox1;Hprt;Hras1;Huwe1;Idh2;Idh3a;Idh3b;Idh3g;Itpa;Lsm2;Lsm5;Macf1;Mag…
Module5_pips1	acetyl-CoA_metabolic_process	4.38846e-09	1.92069e-07	14143	39	1371	18	4.76115	Acly;Aco2;Cs;Dld;Dlst;Idh2;Idh3a;Idh3b;Idh3g;Mdh1;Pdha1;Pdhb;Sdha;Sdhb;Sdhc;Sdhd;Sucla2;Suclg1
Module5_pips1	nucleoside_phosphate_metabolic_process	4.39998e-09	1.92069e-07	14143	463	1371	85	1.89383	Adk;Adsl;Adss;Ak2;Arl1;Asna1;Atic;Atp1b3;Atp2a2;Atp2c1;Atp5g1;Atp5j;Atp5j2;Atp5k;Atp6v0b;Atp6v0c;Atp6v0d1;Atp6v1g1;BC048355;Cad;Cmah;Ctps;Dcakd;Dlst;Dtymk;Enpp3;Gart;Glyr1;Gnai3;Gnl2;Gnl3;Guk1;Hibadh;Hprt;Hras1;Idh3a;Idh3b;Idh3g;Impdh2;Itpa;Ldhb;Macf1;Mdh1;Mras;Msh6;Mthfd1;Myh9;Ndufs1;Nme1;Nme4;Nt5c;Nudt1;Ola1;Pgd;Pgls;Pnp;Ppp2r4;Prdx5;Prps1;Psmc2;Rab11a;Rab11b;Rab2a;Rab5c;Rac1;Rap1b;Rheb;Rhoa;Rr…
Module5_pips1	nucleotide_metabolic_process	4.39998e-09	1.92069e-07	14143	463	1371	85	1.89383	Adk;Adsl;Adss;Ak2;Arl1;Asna1;Atic;Atp1b3;Atp2a2;Atp2c1;Atp5g1;Atp5j;Atp5j2;Atp5k;Atp6v0b;Atp6v0c;Atp6v0d1;Atp6v1g1;BC048355;Cad;Cmah;Ctps;Dcakd;Dlst;Dtymk;Enpp3;Gart;Glyr1;Gnai3;Gnl2;Gnl3;Guk1;Hibadh;Hprt;Hras1;Idh3a;Idh3b;Idh3g;Impdh2;Itpa;Ldhb;Macf1;Mdh1;Mras;Msh6;Mthfd1;Myh9;Ndufs1;Nme1;Nme4;Nt5c;Nudt1;Ola1;Pgd;Pgls;Pnp;Ppp2r4;Prdx5;Prps1;Psmc2;Rab11a;Rab11b;Rab2a;Rab5c;Rac1;Rap1b;Rheb;Rhoa;Rr…
Module5_pips1	coenzyme_metabolic_process	6.32076e-09	2.70044e-07	14143	156	1371	40	2.64508	Acly;Aco2;Atic;Cs;Dcakd;Dld;Dlst;Dnmt1;Gart;Glyr1;Hibadh;Idh2;Idh3a;Idh3b;Idh3g;Ldhb;Mat2a;Mdh1;Mthfd1;Mthfd1l;Mthfd2;Pcmt1;Pdha1;Pdhb;Pgd;Pgls;Pnp;Prdx5;Qdpr;Scp2;Sdha;Sdhb;Sdhc;Sdhd;Sucla2;Suclg1;Tkt;Txnrd1;Vkorc1;Vnn3
Module5_pips1	cellular_component_organization	1.29875e-08	5.4331e-07	14143	2565	1371	327	1.31512	0610010K14Rik;2310016M24Rik;Acin1;Actl6a;Actn1;Actr2;Actr3;Add1;Adrm1;Adsl;Aebp2;Agfg1;Ahctf1;Akt1;Akt1s1;Anapc13;Anapc5;Anln;Anxa5;Anxa7;Aplp1;Aplp2;Apoa1bp;Apoe;App;Arl1;Arpc1a;Arpc1b;Arpc3;Arpc4;Arpc5;Arpp19;Ash2l;Atp2c1;Atp6v0c;Atxn10;Bag6;Bak1;Birc5;Bnip3l;Bub3;Cald1;Capg;Capza2;Carm1;Ccna2;Ccnb1;Ccnb2;Ccng1;Ccrn4l;Cd24a;Cd44;Cd9;Cdc16;Cdc20;Cdca3;Cdca8;Cdkn2a;Celf1;Cenpa;Cenpv;Cetn3;Chaf1b;…
Module5_pips1	cellular_biosynthetic_process	1.69847e-08	6.96026e-07	14143	2562	1371	326	1.31263	2700060E02Rik;Aars;Abcf1;Acly;Actl6a;Adk;Adrm1;Adsl;Adss;Aebp2;Aes;Ahctf1;Ak2;Akr1b3;Akt1;Aldh18a1;Apex1;Apoe;Arid5b;Ash2l;Ass1;Atic;Atp2a2;Atp2c1;Atp5g1;Atp5j;Atp5j2;Atp5k;Bcat1;Bcat2;Bclaf1;Bhlhe40;Birc5;Cad;Carm1;Cars;Ccne1;Ccnl1;Cd81;Cdca7;Cdipt;Cdk9;Cdkn2a;Cdt1;Cebpd;Chaf1b;Chd4;Chmp1a;Churc1;Csnk2a1;Ctbp1;Ctcf;Ctnnd1;Ctps;Dars;Dbf4;Dcakd;Ddost;Ddt;Ddx1;Ddx17;Ddx54;Degs1;Denr;Dld;Dnajc2;Dnmt…
Module5_pips1	cellular_component_assembly	1.85437e-08	7.44716e-07	14143	940	1371	143	1.56932	2310016M24Rik;Actn1;Add1;Adrm1;Adsl;Agfg1;Ahctf1;Anxa5;Apoa1bp;Apoe;App;Arpc4;Bag6;Cald1;Capg;Ccnb1;Ccrn4l;Cd9;Cdkn2a;Celf1;Cenpa;Cenpv;Chaf1b;Clpp;Cltc;Coro1c;Csnk1d;Ctcf;Ctnna1;Ctsd;Cul3;Cyfip1;Dbnl;Dpysl3;E2f4;Ehd1;Ehmt2;Eif2a;Eif3a;Eif6;Ezr;Fbxo5;Glul;Gmnn;Gsn;Gtf2a2;H2-Ke2;H2afx;H2afy;Hdac3;Hjurp;Hmox1;Hprt;Hras1;Hsd17b10;Hspa4;Ilk;Impdh2;Iscu;Itga6;Jup;Krt19;Lamc1;Lsm14a;Lsm2;Mapk3;Max;Mcm2…
Module5_pips1	cellular_component_organization_at_cellular_level	1.97133e-08	7.76161e-07	14143	2124	1371	278	1.35019	0610010K14Rik;2310016M24Rik;Acin1;Actl6a;Actn1;Actr2;Actr3;Add1;Adrm1;Aebp2;Agfg1;Ahctf1;Akt1;Anapc13;Anapc5;Anln;Aplp1;Aplp2;Apoe;App;Arl1;Arpc4;Arpp19;Ash2l;Atp2c1;Atp6v0c;Atxn10;Bag6;Bak1;Birc5;Bnip3l;Bub3;Cald1;Capg;Capza2;Carm1;Ccna2;Ccnb1;Ccnb2;Ccng1;Ccrn4l;Cd24a;Cd44;Cd9;Cdc16;Cdc20;Cdca3;Cdca8;Cdkn2a;Celf1;Cenpa;Cenpv;Cetn3;Chaf1b;Chchd3;Chd3;Chd4;Chmp1a;Cltc;Coro1b;Coro1c;Csnk1a1;Csnk1d;…
Module5_pips1	M_phase	2.56836e-08	9.9178e-07	14143	354	1371	68	1.98157	Ahctf1;Anapc13;Anapc5;Anln;Arpp19;Bag6;Birc5;Bub3;Ccna2;Ccnb1;Ccnb2;Ccng1;Cdc16;Cdc20;Cdca3;Cdca8;Cenpv;Cetn3;Chd3;Chmp1a;Cks2;Cltc;Csnk1a1;Csnk1d;Cul3;D2Ertd750e;Dctn2;Dctn3;Ehmt2;Ensa;Fbxo5;H2afx;Hdac3;Incenp;Mad2l1;Mki67;Msh6;Mybl2;Myh9;Ncapd2;Nsun2;Pafah1b1;Pes1;Plk1;Plk2;Ppp2r2d;Psmd13;Psrc1;Rad21;Rcc1;Rhoa;Rpa1;Rrs1;Ruvbl1;Sept2;Sept7;Setd8;Smc4;Stra13;Syce2;Tacc3;Tipin;Top2a;Tpx2;Tubb3;Ube…
Module5_pips1	macromolecular_complex_subunit_organization	3.44715e-08	1.30602e-06	14143	655	1371	107	1.68518	2310016M24Rik;Adrm1;Adsl;Ahctf1;Anxa5;Apoa1bp;Apoe;Arpc4;Ccnb1;Ccrn4l;Celf1;Cenpa;Cenpv;Clpp;Ctcf;Ctnna1;Dpysl3;Ehd1;Eif2a;Eif3a;Eif6;Etf1;Fbxo5;Glul;Gmnn;Gsn;Gtf2a2;H2-Ke2;H2afx;H2afy;Hjurp;Hmox1;Hprt;Hras1;Hsd17b10;Hspa4;Ict1;Ilk;Impdh2;Jup;Lamc1;Lsm14a;Lsm2;Mapk3;Max;Mcm2;Mdm2;Mff;Mgp;Nacc1;Nap1l4;Napa;Nasp;Ndufs5;Ndufs7;Ndufs8;Nudt21;Nupr1;Ogt;Pam;Pfkl;Pfkp;Picalm;Pih1d1;Ppp5c;Prkcsh;Prmt5;Pr…
Module5_pips1	ribonucleotide_metabolic_process	4.26947e-08	1.58349e-06	14143	308	1371	61	2.04307	Adk;Adsl;Adss;Ak2;Arl1;Asna1;Atic;Atp1b3;Atp2a2;Atp2c1;Atp5g1;Atp5j;Atp5j2;Atp5k;Atp6v0b;Atp6v0c;Atp6v0d1;Atp6v1g1;Cad;Ctps;Gart;Gnai3;Gnl2;Gnl3;Guk1;Hprt;Hras1;Impdh2;Itpa;Macf1;Mras;Msh6;Myh9;Ndufs1;Nme1;Nme4;Ola1;Pnp;Ppp2r4;Prps1;Psmc2;Rab11a;Rab11b;Rab2a;Rab5c;Rac1;Rap1b;Rheb;Rhoa;Rras;Sept2;Smarca4;Smarca5;Srpr;Top2a;Tuba4a;Tubb2a;Tubb2b;Tubb3;Tubb6;Vps4b
Module5_pips1	biosynthetic_process	4.33724e-08	1.58349e-06	14143	2659	1371	334	1.29578	2700060E02Rik;Aars;Abcf1;Acly;Actl6a;Adk;Adrm1;Adsl;Adss;Aebp2;Aes;Ahctf1;Ak2;Akr1b3;Akt1;Aldh18a1;Apex1;Apoe;Arid5b;Ash2l;Ass1;Atic;Atp2a2;Atp2c1;Atp5g1;Atp5j;Atp5j2;Atp5k;Bcat1;Bcat2;Bclaf1;Bhlhe40;Birc5;Cad;Carm1;Cars;Ccnd3;Ccne1;Ccnl1;Cd81;Cdca7;Cdipt;Cdk9;Cdkn2a;Cdt1;Cebpd;Chaf1b;Chd4;Chmp1a;Churc1;Csnk2a1;Ctbp1;Ctcf;Ctnnd1;Ctps;Cyb5r3;Dars;Dbf4;Dcakd;Ddost;Ddt;Ddx1;Ddx17;Ddx54;Degs1;Denr;Dh…
Module5_pips1	ribosome_biogenesis	4.77153e-08	1.71093e-06	14143	148	1371	37	2.57896	Aatf;Bop1;Cdkn2a;Dcaf13;Dkc1;Eif2a;Eif4a3;Eif6;Emg1;Exosc10;Exosc3;Exosc8;Fcf1;Ftsj3;Gar1;Gnl2;Gnl3;Imp3;Ipo4;Mrto4;Nhp2;Nmd3;Nob1;Nop10;Nop14;Nop58;Npm3;Nsa2;Pa2g4;Pes1;Rpf1;Rrp1;Rrp9;Rrs1;Sbds;Tsr1;Utp11l
Module5_pips1	macromolecular_complex_assembly	5.01681e-08	1.76732e-06	14143	604	1371	100	1.70792	2310016M24Rik;Adrm1;Adsl;Ahctf1;Anxa5;Apoa1bp;Apoe;Arpc4;Ccnb1;Ccrn4l;Celf1;Cenpa;Cenpv;Clpp;Ctnna1;Dpysl3;Ehd1;Eif2a;Eif3a;Eif6;Fbxo5;Glul;Gmnn;Gsn;Gtf2a2;H2-Ke2;H2afx;H2afy;Hjurp;Hmox1;Hprt;Hras1;Hsd17b10;Hspa4;Ilk;Impdh2;Jup;Lamc1;Lsm14a;Lsm2;Mapk3;Max;Mcm2;Mdm2;Mff;Mgp;Nacc1;Nap1l4;Ndufs5;Ndufs7;Ndufs8;Nudt21;Nupr1;Ogt;Pam;Pfkl;Pfkp;Picalm;Pih1d1;Ppp5c;Prkcsh;Prmt5;Prnp;Prpf19;Prpf31;Psip1;Ps…
Module5_pips1	energy_derivation_by_oxidation_of_organic_compounds	5.30279e-08	1.78813e-06	14143	101	1371	29	2.96197	Aco2;Adsl;Akt1;Bloc1s1;Cs;Dld;Dlst;Idh2;Idh3a;Idh3b;Idh3g;Mdh1;Mtfr1;Mybbp1a;Ndufa5;Ndufb8;Ndufc2;Ndufs1;Ndufv2;Ppp1cc;Ptges3;Sdha;Sdhb;Sdhc;Sdhd;Sucla2;Suclg1;Tbrg4;Uqcrc1
Module5_pips1	mitosis	5.34302e-08	1.78813e-06	14143	240	1371	51	2.19211	Ahctf1;Anapc13;Anapc5;Anln;Arpp19;Birc5;Bub3;Ccna2;Ccnb1;Ccnb2;Ccng1;Cdc16;Cdc20;Cdca3;Cdca8;Cenpv;Cetn3;Chmp1a;Cltc;Csnk1a1;Cul3;D2Ertd750e;Dctn2;Dctn3;Ensa;Fbxo5;Incenp;Mad2l1;Mybl2;Ncapd2;Nsun2;Pafah1b1;Pes1;Plk1;Ppp2r2d;Psrc1;Rad21;Rcc1;Rhoa;Rrs1;Ruvbl1;Sept2;Sept7;Setd8;Smc4;Stra13;Tipin;Tpx2;Tubb3;Ube2c;Zwint
Module5_pips1	nuclear_division	5.34302e-08	1.78813e-06	14143	240	1371	51	2.19211	Ahctf1;Anapc13;Anapc5;Anln;Arpp19;Birc5;Bub3;Ccna2;Ccnb1;Ccnb2;Ccng1;Cdc16;Cdc20;Cdca3;Cdca8;Cenpv;Cetn3;Chmp1a;Cltc;Csnk1a1;Cul3;D2Ertd750e;Dctn2;Dctn3;Ensa;Fbxo5;Incenp;Mad2l1;Mybl2;Ncapd2;Nsun2;Pafah1b1;Pes1;Plk1;Ppp2r2d;Psrc1;Rad21;Rcc1;Rhoa;Rrs1;Ruvbl1;Sept2;Sept7;Setd8;Smc4;Stra13;Tipin;Tpx2;Tubb3;Ube2c;Zwint
Module5_pips1	organelle_fission	5.56273e-08	1.81645e-06	14143	254	1371	53	2.15252	Ahctf1;Anapc13;Anapc5;Anln;Arpp19;Birc5;Bub3;Ccna2;Ccnb1;Ccnb2;Ccng1;Cdc16;Cdc20;Cdca3;Cdca8;Cenpv;Cetn3;Chmp1a;Cltc;Csnk1a1;Cul3;D2Ertd750e;Dctn2;Dctn3;Ensa;Fbxo5;Fis1;Incenp;Mad2l1;Mff;Mybl2;Ncapd2;Nsun2;Pafah1b1;Pes1;Plk1;Ppp2r2d;Psrc1;Rad21;Rcc1;Rhoa;Rrs1;Ruvbl1;Sept2;Sept7;Setd8;Smc4;Stra13;Tipin;Tpx2;Tubb3;Ube2c;Zwint
Module5_pips1	purine_ribonucleotide_metabolic_process	5.60858e-08	1.81645e-06	14143	296	1371	59	2.0562	Adk;Adsl;Adss;Ak2;Arl1;Asna1;Atic;Atp1b3;Atp2a2;Atp2c1;Atp5g1;Atp5j;Atp5j2;Atp5k;Atp6v0b;Atp6v0c;Atp6v0d1;Atp6v1g1;Gart;Gnai3;Gnl2;Gnl3;Guk1;Hprt;Hras1;Impdh2;Itpa;Macf1;Mras;Msh6;Myh9;Ndufs1;Nme1;Nme4;Ola1;Pnp;Ppp2r4;Prps1;Psmc2;Rab11a;Rab11b;Rab2a;Rab5c;Rac1;Rap1b;Rheb;Rhoa;Rras;Sept2;Smarca4;Smarca5;Srpr;Top2a;Tuba4a;Tubb2a;Tubb2b;Tubb3;Tubb6;Vps4b
Module5_pips1	RNA_splicing,_via_transesterification_reactions	6.267e-08	1.94588e-06	14143	59	1371	21	3.67174	Celf1;Cwc15;Ddx39;Lsm2;Phf5a;Prmt5;Prpf19;Prpf31;Prpf8;Psip1;Rbm17;Rbmxl1;Sf3b1;Snrpa;Snrpc;Snw1;Srrm1;Srsf1;Srsf10;Tra2a;Tra2b
Module5_pips1	cullin_deneddylation	6.29892e-08	1.94588e-06	14143	9	1371	8	9.16962	Cops2;Cops3;Cops4;Cops5;Cops6;Cops7a;Cops8;Gps1
Module5_pips1	protein_deneddylation	6.29892e-08	1.94588e-06	14143	9	1371	8	9.16962	Cops2;Cops3;Cops4;Cops5;Cops6;Cops7a;Cops8;Gps1
Module5_pips1	nucleoside_triphosphate_metabolic_process	6.41965e-08	1.95313e-06	14143	290	1371	58	2.06317	Adk;Adss;Ak2;Arl1;Asna1;Atp1b3;Atp2a2;Atp2c1;Atp5g1;Atp5j;Atp5j2;Atp5k;Atp6v0b;Atp6v0c;Atp6v0d1;Atp6v1g1;Cad;Ctps;Dtymk;Enpp3;Gnai3;Gnl2;Gnl3;Guk1;Hras1;Itpa;Macf1;Mras;Msh6;Myh9;Ndufs1;Nme1;Nme4;Nudt1;Ola1;Pnp;Ppp2r4;Psmc2;Rab11a;Rab11b;Rab2a;Rab5c;Rac1;Rap1b;Rheb;Rhoa;Rras;Sept2;Smarca4;Smarca5;Srpr;Top2a;Tuba4a;Tubb2a;Tubb2b;Tubb3;Tubb6;Vps4b
Module5_pips1	RNA_metabolic_process	1.05112e-07	3.15022e-06	14143	2006	1371	261	1.34219	0610009D07Rik;2700060E02Rik;Aars;Actl6a;Adrm1;Aebp2;Aes;Ahctf1;Alyref;Apex1;Aplp1;App;Arid5b;Ash2l;Bcas2;Bclaf1;Bhlhe40;Birc5;Bop1;Bzw2;Carm1;Cars;Ccnl1;Ccrn4l;Cdca7;Cdk9;Cdkn2a;Cebpd;Celf1;Chaf1b;Chd4;Chmp1a;Churc1;Csnk2a1;Ctbp1;Ctcf;Ctnnd1;Cwc15;D10Wsu52e;Dars;Dcaf13;Ddx1;Ddx17;Ddx39;Ddx54;Dhx15;Dkc1;Dnajb11;Dnajc2;Dnmt1;Dnttip2;Dpy30;Drap1;E2f4;Eed;Eftud2;Egr1;Ehf;Eif2b5;Eif4a3;Eif5;Elof1;Elp2…
Module5_pips1	M_phase_of_mitotic_cell_cycle	1.07058e-07	3.16137e-06	14143	245	1371	51	2.14738	Ahctf1;Anapc13;Anapc5;Anln;Arpp19;Birc5;Bub3;Ccna2;Ccnb1;Ccnb2;Ccng1;Cdc16;Cdc20;Cdca3;Cdca8;Cenpv;Cetn3;Chmp1a;Cltc;Csnk1a1;Cul3;D2Ertd750e;Dctn2;Dctn3;Ensa;Fbxo5;Incenp;Mad2l1;Mybl2;Ncapd2;Nsun2;Pafah1b1;Pes1;Plk1;Ppp2r2d;Psrc1;Rad21;Rcc1;Rhoa;Rrs1;Ruvbl1;Sept2;Sept7;Setd8;Smc4;Stra13;Tipin;Tpx2;Tubb3;Ube2c;Zwint
Module5_pips1	coenzyme_catabolic_process	1.15989e-07	3.37544e-06	14143	29	1371	14	4.98005	Aco2;Cs;Dlst;Idh2;Idh3a;Idh3b;Idh3g;Mdh1;Sdha;Sdhb;Sdhc;Sdhd;Sucla2;Suclg1
Module5_pips1	intracellular_transport	1.85512e-07	5.32154e-06	14143	604	1371	98	1.67376	Aaas;Actr2;Akap12;Akt1;Alyref;Ap1s1;Ap2a1;Ap3s1;App;Arcn1;Arl1;Arl6ip1;Aspscr1;Atp2c1;Bak1;Bcap31;Cd24a;Cltb;Cltc;Copa;Copb1;Copb2;Copg;Copz1;Cse1l;Cul3;Ddx39;Dpy30;Ehd1;Gabarapl2;Gipc1;Hspa4;Ipo4;Ipo7;Klc1;Kpnb1;Lman1;Lmna;M6pr;Macf1;Mapk1;Mapk3;Mff;Mrpl18;Mtx2;Mybbp1a;Napa;Nmd3;Nop58;Nxf1;Pabpn1;Pacs1;Pafah1b1;Pdcd6;Picalm;Psen1;Rab1;Rab2a;Ramp3;Rangrf;Rer1;Samm50;Scarb2;Sec13;Snx2;Snx6;Spnb2;S…
Module5_pips1	RNA_splicing,_via_transesterification_reactions_with_bulged_adenosine_as_nucleophile	2.34991e-07	6.46387e-06	14143	58	1371	20	3.55718	Celf1;Cwc15;Ddx39;Lsm2;Phf5a;Prmt5;Prpf19;Prpf31;Prpf8;Psip1;Rbmxl1;Sf3b1;Snrpa;Snrpc;Snw1;Srrm1;Srsf1;Srsf10;Tra2a;Tra2b
Module5_pips1	nuclear_mRNA_splicing,_via_spliceosome	2.34991e-07	6.46387e-06	14143	58	1371	20	3.55718	Celf1;Cwc15;Ddx39;Lsm2;Phf5a;Prmt5;Prpf19;Prpf31;Prpf8;Psip1;Rbmxl1;Sf3b1;Snrpa;Snrpc;Snw1;Srrm1;Srsf1;Srsf10;Tra2a;Tra2b
Module5_pips1	regulation_of_proteasomal_protein_catabolic_process	2.34991e-07	6.46387e-06	14143	58	1371	20	3.55718	Akt1;Bag6;Csnk1d;Fbxo5;Gipc1;Hspbp1;Mad2l1;Mdm2;Plk1;Psen1;Psmd14;Psme3;Rad23b;Stub1;Sumo1;Ube2v2;Ubqln4;Ubxn1;Usp14;Usp5
Module5_pips1	cellular_component_assembly_at_cellular_level	2.54163e-07	6.89676e-06	14143	624	1371	100	1.65318	2310016M24Rik;Actn1;Add1;Adrm1;Agfg1;Ahctf1;App;Arpc4;Bag6;Cald1;Capg;Ccrn4l;Cd9;Cdkn2a;Celf1;Cenpa;Cenpv;Chaf1b;Cltc;Coro1c;Csnk1d;Ctcf;Ctnna1;Ctsd;Cul3;Cyfip1;Dbnl;Dpysl3;E2f4;Ehmt2;Eif2a;Eif3a;Eif6;Ezr;Fbxo5;Gsn;Gtf2a2;H2-Ke2;H2afx;H2afy;Hdac3;Hjurp;Hspa4;Ilk;Iscu;Itga6;Jup;Krt19;Lamc1;Lsm14a;Lsm2;Mcm2;Mybl2;Nap1l4;Nckap1;Ndufs5;Ndufs7;Ndufs8;Nfu1;Nup85;Pafah1b1;Picalm;Pih1d1;Prdx6;Prmt5;Prpf1…
Module5_pips1	macromolecule_localization	2.85834e-07	7.65273e-06	14143	1145	1371	162	1.45953	Ahctf1;Aim2;Akap12;Akt1;Alyref;Anxa1;Ap1s1;Ap2a1;Ap3s1;Apoe;Arcn1;Arf3;Arf4;Arf5;Arl1;Arl6ip1;Aspscr1;Bag6;Bcap31;Birc5;Bub3;Ccdc23;Cd24a;Cd81;Cenpa;Chmp1a;Chmp2a;Chmp4b;Cltb;Cltc;Copa;Copb1;Copb2;Copg;Copz1;Cpe;Cse1l;Ddx39;Dhcr24;Ehd1;Eif4a3;Erp29;Exosc10;Fnta;G3bp2;Gabarap;Gabarapl2;Get4;Gipc1;Gltp;Got2;Guk1;Hdlbp;Hspa4;Hspg2;Ipo4;Ipo7;Jup;Kdelr1;Klc1;Kpnb1;Lamtor2;Lman1;Lmna;M6pr;Macf1;Magoh;M…
Module5_pips1	cellular_macromolecular_complex_subunit_organization	2.99159e-07	7.90409e-06	14143	310	1371	59	1.96333	2310016M24Rik;Adrm1;Ahctf1;Arpc4;Ccrn4l;Celf1;Cenpa;Cenpv;Ctcf;Eif2a;Eif3a;Eif6;Etf1;Fbxo5;Gsn;Gtf2a2;H2-Ke2;H2afx;H2afy;Hjurp;Hspa4;Ict1;Lsm14a;Lsm2;Mcm2;Nap1l4;Napa;Nasp;Ndufs5;Ndufs7;Ndufs8;Picalm;Pih1d1;Prmt5;Prpf19;Prpf31;Psip1;Psmg1;Pum2;Rbmxl1;Sbds;Sept2;Smarca4;Smarca5;Smarce1;Smc4;Snrpc;Srsf1;Srsf10;Taf10;Tbca;Tfam;Tuba4a;Tubb2a;Tubb2b;Tubb3;Tubb6;Ube2c;Vasp
Module5_pips1	ncRNA_metabolic_process	3.07788e-07	8.02646e-06	14143	239	1371	49	2.11496	Aars;Bop1;Cars;Cdkn2a;D10Wsu52e;Dars;Dcaf13;Dkc1;Eif4a3;Emg1;Eprs;Exosc10;Exosc3;Exosc8;Farsa;Farsb;Fcf1;Ftsj3;Gar1;Hars;Iars;Imp3;Lars;Mars;Nars;Nhp2;Nob1;Nolc1;Nop10;Nop14;Npm3;Nsa2;Nsun2;Pa2g4;Pes1;Rars;Rpf1;Rrp1;Rrp9;Sbds;Srrt;Ssb;Tars;Trmt1;Tsen34;Utp11l;Vars;Wars;Yars
Module5_pips1	organic_acid_metabolic_process	3.36585e-07	8.6649e-06	14143	524	1371	87	1.71274	Aars;Acly;Aco2;Acot7;Acsbg1;Adipor1;Adss;Ahcy;Aldh18a1;Ass1;Bcat1;Bcat2;Cars;Cmah;Crabp2;Cs;Ctps;Cyb5;Dars;Degs1;Dld;Dlst;Dnmt1;Dohh;Ech1;Echdc2;Echs1;Eci2;Eprs;Fads2;Farsa;Farsb;Fasn;Gart;Gcsh;Ggh;Glo1;Glud1;Glul;Got2;Gsr;Gsto1;Gstp2;Hadh;Hars;Hibadh;Iars;Idh2;Idh3a;Idh3b;Idh3g;Lars;Ldhb;Lypla1;Mars;Mat2a;Mdh1;Mthfd1;Mthfd1l;Nars;Ndufab1;Pam;Pck2;Pcmt1;Pdha1;Pdhb;Pgd;Pnp;Prps1;Ptges3;Pycr2;Rars;…
Module5_pips1	tRNA_aminoacylation_for_protein_translation	3.67516e-07	9.34143e-06	14143	40	1371	16	4.12633	Aars;Cars;Dars;Eprs;Farsa;Farsb;Hars;Iars;Lars;Mars;Nars;Rars;Tars;Vars;Wars;Yars
Module5_pips1	ribonucleoside_triphosphate_metabolic_process	3.81516e-07	9.57605e-06	14143	276	1371	54	2.01831	Adss;Ak2;Arl1;Asna1;Atp1b3;Atp2a2;Atp2c1;Atp5g1;Atp5j;Atp5j2;Atp5k;Atp6v0b;Atp6v0c;Atp6v0d1;Atp6v1g1;Cad;Ctps;Gnai3;Gnl2;Gnl3;Guk1;Hras1;Itpa;Macf1;Mras;Msh6;Myh9;Ndufs1;Nme1;Nme4;Ola1;Pnp;Ppp2r4;Psmc2;Rab11a;Rab11b;Rab2a;Rab5c;Rac1;Rap1b;Rheb;Rhoa;Rras;Sept2;Smarca4;Smarca5;Srpr;Top2a;Tuba4a;Tubb2a;Tubb2b;Tubb3;Tubb6;Vps4b
Module5_pips1	protein_transport	4.60951e-07	1.1427e-05	14143	738	1371	113	1.57952	Ahctf1;Aim2;Akap12;Akt1;Ap1s1;Ap2a1;Ap3s1;Arcn1;Arf3;Arf4;Arf5;Arl6ip1;Aspscr1;Bcap31;Ccdc23;Cd24a;Chmp1a;Chmp2a;Chmp4b;Cltb;Cltc;Copa;Copb1;Copb2;Copg;Copz1;Cse1l;Ehd1;Erp29;Gabarap;Gabarapl2;Gipc1;Guk1;Hspa4;Ipo4;Ipo7;Kdelr1;Klc1;Kpnb1;Lman1;Lmna;M6pr;Macf1;Mapk1;Mapk3;Mff;Mtx2;Myh9;Myo1c;Napa;Nasp;Nmd3;Nop58;Nup62;Nup85;Nup88;Nup93;Pacs1;Pafah1b1;Pdcd6;Pdcd6ip;Pnp;Preb;Psen1;Rab1;Rab11a;Rab11b…
Module5_pips1	intracellular_protein_transport	5.23291e-07	1.28143e-05	14143	352	1371	64	1.87561	Akap12;Akt1;Ap1s1;Ap2a1;Ap3s1;Arcn1;Arl6ip1;Aspscr1;Bcap31;Cd24a;Cltb;Cltc;Copa;Copb1;Copb2;Copg;Copz1;Cse1l;Ehd1;Gipc1;Hspa4;Ipo4;Ipo7;Klc1;Kpnb1;Lmna;M6pr;Macf1;Mapk1;Mapk3;Mff;Mtx2;Napa;Nop58;Pacs1;Pdcd6;Rab1;Rab2a;Ramp3;Samm50;Scarb2;Snx2;Snx6;Spnb2;Srp14;Srp72;Srp9;Srpr;Ssr3;Syngr2;Timm13;Timm17a;Timm8b;Tmed2;Tomm20;Tomm22;Tomm40;Tomm5;Tomm7;Trp53;Xpo1;Ywhab;Ywhag;Ywhah
Module5_pips1	cellular_macromolecule_biosynthetic_process	5.89754e-07	1.42678e-05	14143	2046	1371	261	1.31595	2700060E02Rik;Aars;Abcf1;Actl6a;Adrm1;Aebp2;Aes;Ahctf1;Akt1;Apex1;Apoe;Arid5b;Ash2l;Bclaf1;Bhlhe40;Birc5;Carm1;Cars;Ccne1;Ccnl1;Cdca7;Cdk9;Cdkn2a;Cdt1;Cebpd;Chaf1b;Chd4;Chmp1a;Churc1;Csnk2a1;Ctbp1;Ctcf;Ctnnd1;Dars;Dbf4;Ddost;Ddx1;Ddx17;Ddx54;Denr;Dnajc2;Dnmt1;Dnttip2;Dpm3;Dpy30;Drap1;E2f4;Eed;Eef1e1;Eftud2;Egr1;Ehf;Eif1a;Eif1ax;Eif2a;Eif2b5;Eif2d;Eif2s1;Eif2s3x;Eif3a;Eif3b;Eif3f;Eif3g;Eif4a3;Eif4…
Module5_pips1	purine_nucleoside_triphosphate_metabolic_process	6.14017e-07	1.46112e-05	14143	280	1371	54	1.98948	Adk;Adss;Ak2;Arl1;Asna1;Atp1b3;Atp2a2;Atp2c1;Atp5g1;Atp5j;Atp5j2;Atp5k;Atp6v0b;Atp6v0c;Atp6v0d1;Atp6v1g1;Gnai3;Gnl2;Gnl3;Guk1;Hras1;Itpa;Macf1;Mras;Msh6;Myh9;Ndufs1;Nme1;Nme4;Nudt1;Ola1;Pnp;Ppp2r4;Psmc2;Rab11a;Rab11b;Rab2a;Rab5c;Rac1;Rap1b;Rheb;Rhoa;Rras;Sept2;Smarca4;Smarca5;Srpr;Top2a;Tuba4a;Tubb2a;Tubb2b;Tubb3;Tubb6;Vps4b
Module5_pips1	protein_localization	6.20423e-07	1.46112e-05	14143	995	1371	143	1.48258	Ahctf1;Aim2;Akap12;Akt1;Ap1s1;Ap2a1;Ap3s1;Apoe;Arcn1;Arf3;Arf4;Arf5;Arl1;Arl6ip1;Aspscr1;Bag6;Bcap31;Birc5;Bub3;Ccdc23;Cd24a;Cd81;Cenpa;Chmp1a;Chmp2a;Chmp4b;Cltb;Cltc;Copa;Copb1;Copb2;Copg;Copz1;Cpe;Cse1l;Dhcr24;Ehd1;Erp29;Fnta;Gabarap;Gabarapl2;Get4;Gipc1;Guk1;Hspa4;Hspg2;Ipo4;Ipo7;Jup;Kdelr1;Klc1;Kpnb1;Lamtor2;Lman1;Lmna;M6pr;Macf1;Mapk1;Mapk3;March5;Mdm2;Mff;Mtx2;Myh9;Myo1c;Napa;Nasp;Nckap1;Ne…
Module5_pips1	translational_initiation	6.25778e-07	1.46112e-05	14143	56	1371	19	3.50001	Abcf1;Denr;Eif1a;Eif1ax;Eif2a;Eif2b5;Eif2d;Eif2s1;Eif2s3x;Eif3a;Eif3b;Eif3f;Eif3g;Eif4a3;Eif4e;Eif4e2;Eif4h;Eif5;Eif6
Module5_pips1	carboxylic_acid_metabolic_process	7.02646e-07	1.60331e-05	14143	517	1371	85	1.69603	Aars;Acly;Aco2;Acot7;Acsbg1;Adipor1;Adss;Ahcy;Aldh18a1;Ass1;Bcat1;Bcat2;Cars;Cmah;Crabp2;Cs;Ctps;Cyb5;Dars;Degs1;Dld;Dlst;Dnmt1;Dohh;Ech1;Echdc2;Echs1;Eci2;Eprs;Fads2;Farsa;Farsb;Fasn;Gart;Gcsh;Ggh;Glo1;Glud1;Glul;Got2;Gsr;Gsto1;Gstp2;Hadh;Hars;Hibadh;Iars;Idh2;Idh3a;Idh3b;Idh3g;Lars;Ldhb;Lypla1;Mars;Mat2a;Mdh1;Mthfd1;Mthfd1l;Nars;Ndufab1;Pam;Pck2;Pcmt1;Pdha1;Pdhb;Pgd;Ptges3;Pycr2;Rars;Scd2;Sdha;…
Module5_pips1	oxoacid_metabolic_process	7.02646e-07	1.60331e-05	14143	517	1371	85	1.69603	Aars;Acly;Aco2;Acot7;Acsbg1;Adipor1;Adss;Ahcy;Aldh18a1;Ass1;Bcat1;Bcat2;Cars;Cmah;Crabp2;Cs;Ctps;Cyb5;Dars;Degs1;Dld;Dlst;Dnmt1;Dohh;Ech1;Echdc2;Echs1;Eci2;Eprs;Fads2;Farsa;Farsb;Fasn;Gart;Gcsh;Ggh;Glo1;Glud1;Glul;Got2;Gsr;Gsto1;Gstp2;Hadh;Hars;Hibadh;Iars;Idh2;Idh3a;Idh3b;Idh3g;Lars;Ldhb;Lypla1;Mars;Mat2a;Mdh1;Mthfd1;Mthfd1l;Nars;Ndufab1;Pam;Pck2;Pcmt1;Pdha1;Pdhb;Pgd;Ptges3;Pycr2;Rars;Scd2;Sdha;…
Module5_pips1	establishment_of_localization	9.50751e-07	2.13472e-05	14143	2150	1371	271	1.30027	1190003J15Rik;Aaas;Actr2;Agfg1;Ahctf1;Aim2;Akap12;Akt1;Alyref;Ano1;Anxa1;Anxa6;Ap1s1;Ap2a1;Ap3s1;Aplp1;Apoe;App;Arcn1;Arf3;Arf4;Arf5;Arl1;Arl6ip1;Asna1;Aspscr1;Atox1;Atp1b3;Atp2a2;Atp2c1;Atp5g1;Atp5j;Atp5j2;Atp5k;Atp6v0b;Atp6v0c;Atp6v0d1;Atp6v0e;Atp6v1e1;Atp6v1f;Atp6v1g1;Bag6;Bak1;Bcap31;Birc5;Canx;Ccdc23;Ccnb1;Ccnd1;Cd24a;Cenpa;Chmp1a;Chmp2a;Chmp4b;Clic4;Clns1a;Cltb;Cltc;Cmah;Copa;Copb1;Copb2;Co…
Module5_pips1	macromolecule_biosynthetic_process	9.56796e-07	2.13472e-05	14143	2067	1371	262	1.30757	2700060E02Rik;Aars;Abcf1;Actl6a;Adrm1;Aebp2;Aes;Ahctf1;Akt1;Apex1;Apoe;Arid5b;Ash2l;Bclaf1;Bhlhe40;Birc5;Carm1;Cars;Ccnd3;Ccne1;Ccnl1;Cdca7;Cdk9;Cdkn2a;Cdt1;Cebpd;Chaf1b;Chd4;Chmp1a;Churc1;Csnk2a1;Ctbp1;Ctcf;Ctnnd1;Dars;Dbf4;Ddost;Ddx1;Ddx17;Ddx54;Denr;Dnajc2;Dnmt1;Dnttip2;Dpm3;Dpy30;Drap1;E2f4;Eed;Eef1e1;Eftud2;Egr1;Ehf;Eif1a;Eif1ax;Eif2a;Eif2b5;Eif2d;Eif2s1;Eif2s3x;Eif3a;Eif3b;Eif3f;Eif3g;Eif4a…
Module5_pips1	DNA_metabolic_process	1.06329e-06	2.34624e-05	14143	546	1371	88	1.66262	Acin1;Actl6a;Apex1;Bccip;Ccne1;Cdk9;Cdkn2a;Cdt1;Cenpa;Cenpv;Chaf1b;Chmp1a;Ctcf;Cul4b;Dbf4;Ddx1;Dnajc2;Dnmt1;Eef1e1;Ehmt2;Exosc3;Eya2;H2afx;H2afy;Hjurp;Huwe1;Lig1;Mcm10;Mcm2;Mcm3;Mcm4;Mcm5;Mcm6;Mcm7;Mcrs1;Morf4l2;Msh6;Mta2;Nae1;Nap1l4;Nasp;Ncapd2;Ncaph2;Nsmce1;Nudt1;Parp1;Phb;Pold2;Prpf19;Rad21;Rad23b;Rbx1;Rfc2;Rfc4;Rfc5;Rpa1;Rpa3;Rrm1;Ruvbl1;Sfr1;Slbp;Smarca4;Smarca5;Smc4;Ssbp1;Stra13;Stub1;Supt1…
Module5_pips1	establishment_of_protein_localization	1.0919e-06	2.38319e-05	14143	759	1371	114	1.54941	Ahctf1;Aim2;Akap12;Akt1;Ap1s1;Ap2a1;Ap3s1;Arcn1;Arf3;Arf4;Arf5;Arl6ip1;Aspscr1;Bcap31;Ccdc23;Cd24a;Chmp1a;Chmp2a;Chmp4b;Cltb;Cltc;Copa;Copb1;Copb2;Copg;Copz1;Cse1l;Ehd1;Erp29;Gabarap;Gabarapl2;Gipc1;Guk1;Hspa4;Ipo4;Ipo7;Kdelr1;Klc1;Kpnb1;Lman1;Lmna;M6pr;Macf1;Mapk1;Mapk3;Mdm2;Mff;Mtx2;Myh9;Myo1c;Napa;Nasp;Nmd3;Nop58;Nup62;Nup85;Nup88;Nup93;Pacs1;Pafah1b1;Pdcd6;Pdcd6ip;Pnp;Preb;Psen1;Rab1;Rab11a;R…
Module5_pips1	amino_acid_activation	1.17026e-06	2.49987e-05	14143	43	1371	16	3.83845	Aars;Cars;Dars;Eprs;Farsa;Farsb;Hars;Iars;Lars;Mars;Nars;Rars;Tars;Vars;Wars;Yars
Module5_pips1	tRNA_aminoacylation	1.17026e-06	2.49987e-05	14143	43	1371	16	3.83845	Aars;Cars;Dars;Eprs;Farsa;Farsb;Hars;Iars;Lars;Mars;Nars;Rars;Tars;Vars;Wars;Yars
Module5_pips1	cellular_ketone_metabolic_process	1.34752e-06	2.84823e-05	14143	533	1371	86	1.66447	Aars;Acly;Aco2;Acot7;Acsbg1;Adipor1;Adss;Ahcy;Aldh18a1;Ass1;Bcat1;Bcat2;Cars;Cmah;Crabp2;Cs;Ctps;Cyb5;Dars;Degs1;Dld;Dlst;Dnmt1;Dohh;Ech1;Echdc2;Echs1;Eci2;Eprs;Fads2;Farsa;Farsb;Fasn;Gart;Gcsh;Ggh;Glo1;Glud1;Glul;Got2;Gsr;Gsto1;Gstp2;Hadh;Hars;Hibadh;Iars;Idh2;Idh3a;Idh3b;Idh3g;Lars;Ldhb;Lypla1;Mars;Mat2a;Mdh1;Mthfd1;Mthfd1l;Nars;Ndufab1;Pam;Pck2;Pcmt1;Pdha1;Pdhb;Pgd;Ptges3;Pycr2;Rars;Scd2;Sdha;…
Module5_pips1	purine_ribonucleoside_triphosphate_metabolic_process	1.45968e-06	3.05317e-05	14143	273	1371	52	1.96492	Adss;Ak2;Arl1;Asna1;Atp1b3;Atp2a2;Atp2c1;Atp5g1;Atp5j;Atp5j2;Atp5k;Atp6v0b;Atp6v0c;Atp6v0d1;Atp6v1g1;Gnai3;Gnl2;Gnl3;Guk1;Hras1;Itpa;Macf1;Mras;Msh6;Myh9;Ndufs1;Nme1;Nme4;Ola1;Pnp;Ppp2r4;Psmc2;Rab11a;Rab11b;Rab2a;Rab5c;Rac1;Rap1b;Rheb;Rhoa;Rras;Sept2;Smarca4;Smarca5;Srpr;Top2a;Tuba4a;Tubb2a;Tubb2b;Tubb3;Tubb6;Vps4b
Module5_pips1	cellular_macromolecular_complex_assembly	1.50233e-06	3.10999e-05	14143	266	1371	51	1.97785	2310016M24Rik;Adrm1;Ahctf1;Arpc4;Ccrn4l;Celf1;Cenpa;Cenpv;Eif2a;Eif3a;Eif6;Fbxo5;Gsn;Gtf2a2;H2-Ke2;H2afx;H2afy;Hjurp;Hspa4;Lsm14a;Lsm2;Mcm2;Nap1l4;Ndufs5;Ndufs7;Ndufs8;Picalm;Pih1d1;Prmt5;Prpf19;Prpf31;Psip1;Psmg1;Pum2;Rbmxl1;Sbds;Sept2;Smarca4;Smarca5;Snrpc;Srsf1;Srsf10;Taf10;Tbca;Tfam;Tuba4a;Tubb2a;Tubb2b;Tubb3;Tubb6;Ube2c
Module5_pips1	protein_modification_by_small_protein_conjugation_or_removal	1.60069e-06	3.27977e-05	14143	348	1371	62	1.83788	Akt1;Anapc13;Anapc5;Cdc16;Cdc34;Cdkn2a;Cops2;Cops3;Cops4;Cops5;Cops6;Cops7a;Cops8;Cul1;Cul3;Fbxo15;Gps1;Huwe1;Kat2a;March5;Mdm2;Nae1;Nedd8;Nsmce1;Otub1;Plk1;Prpf19;Rbck1;Rbx1;Rnf187;Rnf2;Rnf220;Rnf7;Sae1;Skp1a;Stub1;Sumo1;Sumo3;Taf10;Tnks2;Traf7;Trip12;Uba3;Ube2a;Ube2b;Ube2c;Ube2e1;Ube2j2;Ube2k;Ube2l3;Ube2m;Ube2n;Ube2v1;Ubr5;Uchl1;Uchl3;Ufc1;Uhrf1;Usp1;Usp10;Usp5;Usp7
Module5_pips1	regulation_of_proteasomal_ubiquitin-dependent_protein_catabolic_process	1.70364e-06	3.45547e-05	14143	49	1371	17	3.57896	Akt1;Bag6;Csnk1d;Fbxo5;Gipc1;Hspbp1;Mad2l1;Mdm2;Plk1;Psen1;Rad23b;Stub1;Sumo1;Ube2v2;Ubqln4;Ubxn1;Usp5
Module5_pips1	purine-containing_compound_metabolic_process	1.86284e-06	3.74057e-05	14143	380	1371	66	1.7917	1190003J15Rik;Adk;Adsl;Adss;Ak2;Arl1;Asna1;Atic;Atp1b3;Atp2a2;Atp2c1;Atp5g1;Atp5j;Atp5j2;Atp5k;Atp6v0b;Atp6v0c;Atp6v0d1;Atp6v1g1;Dcakd;Dnmt1;Gart;Gnai3;Gnl2;Gnl3;Guk1;Hprt;Hras1;Impdh2;Itpa;Macf1;Mat2a;Mras;Msh6;Mthfd1;Myh9;Ndufs1;Nme1;Nme4;Nudt1;Ola1;Pcmt1;Pnp;Ppp2r4;Prps1;Psmc2;Rab11a;Rab11b;Rab2a;Rab5c;Rac1;Rap1b;Rheb;Rhoa;Rras;Sept2;Smarca4;Smarca5;Srpr;Top2a;Tuba4a;Tubb2a;Tubb2b;Tubb3;Tubb6;…
Module5_pips1	carbohydrate_derivative_metabolic_process	1.96629e-06	3.90923e-05	14143	562	1371	89	1.63365	Adk;Adss;Ak2;Akr1b3;Akr7a5;Arl1;Asna1;Atic;Atp2a2;Atp2c1;Atp5j;Atp5j2;Atp5k;Atp6v0b;Atp6v0c;Atp6v0d1;Atp6v1g1;BC048355;Bgn;Cad;Cmah;Ctps;Dcakd;Ddost;Dhcr24;Dnmt1;Dtymk;Galnt1;Ganab;Gnai3;Gnl2;Gnl3;Guk1;Hprt;Hras1;Impdh2;Itpa;Krtcap2;Macf1;Mat2a;Mras;Msh6;Myh9;Nme1;Nme4;Nt5c;Nudt1;Ogt;Ola1;Pcmt1;Pfkl;Pfkp;Pnp;Porcn;Ppp2r4;Prkcsh;Prps1;Psen1;Psmc2;Rab11a;Rab11b;Rab2a;Rab5c;Rac1;Rap1b;Rheb;Rhoa;Rpn1…
Module5_pips1	cellular_macromolecule_localization	2.13319e-06	4.19945e-05	14143	555	1371	88	1.63566	Akap12;Akt1;Ap1s1;Ap2a1;Ap3s1;Arcn1;Arl1;Arl6ip1;Aspscr1;Bag6;Bcap31;Bub3;Cd24a;Cenpa;Cltb;Cltc;Copa;Copb1;Copb2;Copg;Copz1;Cpe;Cse1l;Ehd1;Exosc10;Fnta;Get4;Gipc1;Hspa4;Ipo4;Ipo7;Jup;Kdelr1;Klc1;Kpnb1;Lamtor2;Lmna;M6pr;Macf1;Mapk1;Mapk3;March5;Mdm2;Mff;Mtx2;Napa;Nop58;Pacs1;Pdcd6;Pes1;Plk1;Rab1;Rab11a;Rab2a;Rad21;Ramp3;Rraga;Samm50;Scarb2;Slc9a3r1;Snx2;Snx6;Spnb2;Srp14;Srp72;Srp9;Srpr;Ssr3;Syne2;…
Module5_pips1	purine_nucleotide_metabolic_process	2.27519e-06	4.43552e-05	14143	344	1371	61	1.82926	Adk;Adsl;Adss;Ak2;Arl1;Asna1;Atic;Atp1b3;Atp2a2;Atp2c1;Atp5g1;Atp5j;Atp5j2;Atp5k;Atp6v0b;Atp6v0c;Atp6v0d1;Atp6v1g1;Gart;Gnai3;Gnl2;Gnl3;Guk1;Hprt;Hras1;Impdh2;Itpa;Macf1;Mras;Msh6;Mthfd1;Myh9;Ndufs1;Nme1;Nme4;Nudt1;Ola1;Pnp;Ppp2r4;Prps1;Psmc2;Rab11a;Rab11b;Rab2a;Rab5c;Rac1;Rap1b;Rheb;Rhoa;Rras;Sept2;Smarca4;Smarca5;Srpr;Top2a;Tuba4a;Tubb2a;Tubb2b;Tubb3;Tubb6;Vps4b
Module5_pips1	transport	2.5474e-06	4.88166e-05	14143	2101	1371	263	1.29132	1190003J15Rik;Aaas;Actr2;Agfg1;Ahctf1;Aim2;Akap12;Akt1;Alyref;Ano1;Anxa1;Anxa6;Ap1s1;Ap2a1;Ap3s1;Aplp1;Apoe;App;Arcn1;Arf3;Arf4;Arf5;Arl1;Arl6ip1;Asna1;Aspscr1;Atox1;Atp1b3;Atp2a2;Atp2c1;Atp5g1;Atp5j;Atp5j2;Atp5k;Atp6v0b;Atp6v0c;Atp6v0d1;Atp6v0e;Atp6v1e1;Atp6v1f;Atp6v1g1;Bag6;Bak1;Bcap31;Canx;Ccdc23;Ccnd1;Cd24a;Chmp1a;Chmp2a;Chmp4b;Clic4;Clns1a;Cltb;Cltc;Cmah;Copa;Copb1;Copb2;Copg;Copz1;Coro1c;Co…
Module5_pips1	rRNA_processing	2.55266e-06	4.88166e-05	14143	101	1371	26	2.65556	Bop1;Cdkn2a;Dcaf13;Dkc1;Eif4a3;Emg1;Exosc10;Exosc3;Exosc8;Fcf1;Ftsj3;Gar1;Imp3;Nhp2;Nob1;Nop10;Nop14;Npm3;Nsa2;Pa2g4;Pes1;Rpf1;Rrp1;Rrp9;Sbds;Utp11l
Module5_pips1	cellular_protein_localization	3.12761e-06	5.92476e-05	14143	552	1371	87	1.62586	Akap12;Akt1;Ap1s1;Ap2a1;Ap3s1;Arcn1;Arl1;Arl6ip1;Aspscr1;Bag6;Bcap31;Bub3;Cd24a;Cenpa;Cltb;Cltc;Copa;Copb1;Copb2;Copg;Copz1;Cpe;Cse1l;Ehd1;Fnta;Get4;Gipc1;Hspa4;Ipo4;Ipo7;Jup;Kdelr1;Klc1;Kpnb1;Lamtor2;Lmna;M6pr;Macf1;Mapk1;Mapk3;March5;Mdm2;Mff;Mtx2;Napa;Nop58;Pacs1;Pdcd6;Pes1;Plk1;Rab1;Rab11a;Rab2a;Rad21;Ramp3;Rraga;Samm50;Scarb2;Slc9a3r1;Snx2;Snx6;Spnb2;Srp14;Srp72;Srp9;Srpr;Ssr3;Syne2;Syngr2;T…
Module5_pips1	cellular_nitrogen_compound_catabolic_process	3.44483e-06	6.46469e-05	14143	303	1371	55	1.87251	Adss;Arl1;Asna1;Atp2a2;Atp2c1;Atp5j;Atp5j2;Atp5k;Atp6v0b;Atp6v0c;Atp6v0d1;Atp6v1g1;BC048355;Blvra;Blvrb;Dpysl3;Enpp3;Gnai3;Gnl2;Gnl3;Hmox1;Hprt;Hras1;Itpa;Macf1;Mras;Msh6;Myh9;Nt5c;Nudt1;Ola1;Pnp;Ppp2r4;Psmc2;Rab11a;Rab11b;Rab2a;Rab5c;Rac1;Rap1b;Rheb;Rhoa;Rras;Sept2;Smarca4;Smarca5;Srpr;Top2a;Tuba4a;Tubb2a;Tubb2b;Tubb3;Tubb6;Upp1;Vps4b
Module5_pips1	regulation_of_cell_cycle	3.74683e-06	6.96632e-05	14143	506	1371	81	1.65135	Aatf;Akt1;Apex1;App;Bak1;Bcat1;Bccip;Birc5;Bop1;Bub3;Ccna2;Ccnb1;Ccnb2;Ccnd1;Ccnd3;Ccne1;Ccng1;Ccnl1;Cdc20;Cdk9;Cdkn1a;Cdkn2a;Cdt1;Chmp1a;Cops5;Csnk2a1;Ctbp1;Cul4b;Dbf4;E2f4;Eif4e;Ezh2;Fbxo5;Fnta;Foxo4;Gadd45a;Gmnn;H2afx;Hdac3;Hras1;Id3;Ilk;Lmnb1;Macf1;Mad2l1;Mdm2;Mybbp1a;Nae1;Nupr1;Pafah1b1;Pcbp4;Pes1;Pim3;Plk1;Plk2;Ppm1g;Ppp2r5c;Psrc1;Rcc1;Rhoa;Sbds;Sfn;Sin3b;Slbp;Son;Sox2;Tacc3;Tbrg1;Tcf3;Tipi…
Module5_pips1	ribonucleotide_biosynthetic_process	4.40877e-06	8.12185e-05	14143	74	1371	21	2.92746	Adk;Adsl;Adss;Ak2;Atic;Atp2a2;Atp2c1;Atp5g1;Atp5j;Atp5j2;Atp5k;Cad;Ctps;Gart;Guk1;Hprt;Impdh2;Nme1;Nme4;Pnp;Prps1
Module5_pips1	rRNA_metabolic_process	4.59058e-06	8.37989e-05	14143	104	1371	26	2.57896	Bop1;Cdkn2a;Dcaf13;Dkc1;Eif4a3;Emg1;Exosc10;Exosc3;Exosc8;Fcf1;Ftsj3;Gar1;Imp3;Nhp2;Nob1;Nop10;Nop14;Npm3;Nsa2;Pa2g4;Pes1;Rpf1;Rrp1;Rrp9;Sbds;Utp11l
Module5_pips1	heterocycle_catabolic_process	5.17347e-06	9.35885e-05	14143	292	1371	53	1.87239	Adss;Arl1;Asna1;Atp2a2;Atp2c1;Atp5j;Atp5j2;Atp5k;Atp6v0b;Atp6v0c;Atp6v0d1;Atp6v1g1;Blvra;Blvrb;Dpysl3;Gnai3;Gnl2;Gnl3;Hmox1;Hprt;Hras1;Itpa;Macf1;Mras;Msh6;Mthfd1;Myh9;Nt5c;Nudt1;Ola1;Pnp;Ppp2r4;Psmc2;Rab11a;Rab11b;Rab2a;Rab5c;Rac1;Rap1b;Rheb;Rhoa;Rras;Sept2;Smarca4;Smarca5;Srpr;Top2a;Tuba4a;Tubb2a;Tubb2b;Tubb3;Tubb6;Vps4b
Module5_pips1	cotranslational_protein_targeting_to_membrane	5.27544e-06	9.37441e-05	14143	7	1371	6	8.84214	Arl6ip1;Srp14;Srp72;Srp9;Srpr;Ssr3
Module5_pips1	protein_neddylation	5.27544e-06	9.37441e-05	14143	7	1371	6	8.84214	Nae1;Nedd8;Rbx1;Rnf7;Uba3;Ube2m
Module5_pips1	regulation_of_mitotic_cell_cycle	6.86863e-06	0.000120312	14143	207	1371	41	2.04323	Aatf;Apex1;App;Bcat1;Birc5;Ccnb1;Ccnd1;Ccng1;Cdkn1a;Cdkn2a;Cdt1;Chmp1a;Csnk2a1;Cul4b;Dbf4;Eif4e;Fbxo5;Foxo4;Hdac3;Hras1;Mad2l1;Mdm2;Nae1;Pafah1b1;Pcbp4;Pim3;Plk1;Plk2;Ppp2r5c;Psrc1;Rcc1;Sbds;Tipin;Top2a;Tpr;Tpx2;Trp53;Ube2c;Ube2l3;Ywhah;Zwint
Module5_pips1	nucleoside_triphosphate_catabolic_process	6.89036e-06	0.000120312	14143	243	1371	46	1.95279	Adss;Arl1;Asna1;Atp2a2;Atp2c1;Atp5j;Atp5j2;Atp5k;Atp6v0b;Atp6v0c;Atp6v0d1;Atp6v1g1;Enpp3;Gnai3;Gnl2;Gnl3;Hras1;Itpa;Macf1;Mras;Msh6;Myh9;Nudt1;Ola1;Ppp2r4;Psmc2;Rab11a;Rab11b;Rab2a;Rab5c;Rac1;Rap1b;Rheb;Rhoa;Rras;Sept2;Smarca4;Smarca5;Srpr;Top2a;Tuba4a;Tubb2a;Tubb2b;Tubb3;Tubb6;Vps4b
Module5_pips1	DNA_replication	8.02901e-06	0.000138985	14143	146	1371	32	2.261	Ccne1;Cdk9;Cdt1;Chaf1b;Dbf4;Dnajc2;Lig1;Mcm10;Mcm2;Mcm3;Mcm4;Mcm5;Mcm6;Mcm7;Nae1;Nasp;Phb;Pold2;Rfc2;Rfc4;Rfc5;Rpa1;Rpa3;Rrm1;Slbp;Ssbp1;Stra13;Supt16h;Tbrg1;Tipin;Tk1;Top2a
Module5_pips1	purine_nucleoside_triphosphate_catabolic_process	8.92217e-06	0.000153126	14143	238	1371	45	1.95047	Adss;Arl1;Asna1;Atp2a2;Atp2c1;Atp5j;Atp5j2;Atp5k;Atp6v0b;Atp6v0c;Atp6v0d1;Atp6v1g1;Gnai3;Gnl2;Gnl3;Hras1;Itpa;Macf1;Mras;Msh6;Myh9;Nudt1;Ola1;Ppp2r4;Psmc2;Rab11a;Rab11b;Rab2a;Rab5c;Rac1;Rap1b;Rheb;Rhoa;Rras;Sept2;Smarca4;Smarca5;Srpr;Top2a;Tuba4a;Tubb2a;Tubb2b;Tubb3;Tubb6;Vps4b
Module5_pips1	nucleotide_catabolic_process	9.03857e-06	0.000153809	14143	275	1371	50	1.87561	Adss;Arl1;Asna1;Atp2a2;Atp2c1;Atp5j;Atp5j2;Atp5k;Atp6v0b;Atp6v0c;Atp6v0d1;Atp6v1g1;BC048355;Enpp3;Gnai3;Gnl2;Gnl3;Hprt;Hras1;Itpa;Macf1;Mras;Msh6;Myh9;Nt5c;Nudt1;Ola1;Ppp2r4;Psmc2;Rab11a;Rab11b;Rab2a;Rab5c;Rac1;Rap1b;Rheb;Rhoa;Rras;Sept2;Smarca4;Smarca5;Srpr;Top2a;Tuba4a;Tubb2a;Tubb2b;Tubb3;Tubb6;Upp1;Vps4b
Module5_pips1	purine_ribonucleotide_biosynthetic_process	9.92457e-06	0.000166275	14143	66	1371	19	2.96971	Adk;Adsl;Adss;Ak2;Atic;Atp2a2;Atp2c1;Atp5g1;Atp5j;Atp5j2;Atp5k;Gart;Guk1;Hprt;Impdh2;Nme1;Nme4;Pnp;Prps1
Module5_pips1	purine_ribonucleotide_catabolic_process	9.98261e-06	0.000166275	14143	239	1371	45	1.94231	Adss;Arl1;Asna1;Atp2a2;Atp2c1;Atp5j;Atp5j2;Atp5k;Atp6v0b;Atp6v0c;Atp6v0d1;Atp6v1g1;Gnai3;Gnl2;Gnl3;Hprt;Hras1;Itpa;Macf1;Mras;Msh6;Myh9;Ola1;Ppp2r4;Psmc2;Rab11a;Rab11b;Rab2a;Rab5c;Rac1;Rap1b;Rheb;Rhoa;Rras;Sept2;Smarca4;Smarca5;Srpr;Top2a;Tuba4a;Tubb2a;Tubb2b;Tubb3;Tubb6;Vps4b
Module5_pips1	nucleobase-containing_compound_catabolic_process	1.00195e-05	0.000166275	14143	291	1371	52	1.84338	Adss;Arl1;Asna1;Atp2a2;Atp2c1;Atp5j;Atp5j2;Atp5k;Atp6v0b;Atp6v0c;Atp6v0d1;Atp6v1g1;BC048355;Dpysl3;Enpp3;Gnai3;Gnl2;Gnl3;Hprt;Hras1;Itpa;Macf1;Mras;Msh6;Myh9;Nt5c;Nudt1;Ola1;Pnp;Ppp2r4;Psmc2;Rab11a;Rab11b;Rab2a;Rab5c;Rac1;Rap1b;Rheb;Rhoa;Rras;Sept2;Smarca4;Smarca5;Srpr;Top2a;Tuba4a;Tubb2a;Tubb2b;Tubb3;Tubb6;Upp1;Vps4b
Module5_pips1	purine_ribonucleoside_triphosphate_catabolic_process	1.29222e-05	0.000212687	14143	234	1371	44	1.93973	Adss;Arl1;Asna1;Atp2a2;Atp2c1;Atp5j;Atp5j2;Atp5k;Atp6v0b;Atp6v0c;Atp6v0d1;Atp6v1g1;Gnai3;Gnl2;Gnl3;Hras1;Itpa;Macf1;Mras;Msh6;Myh9;Ola1;Ppp2r4;Psmc2;Rab11a;Rab11b;Rab2a;Rab5c;Rac1;Rap1b;Rheb;Rhoa;Rras;Sept2;Smarca4;Smarca5;Srpr;Top2a;Tuba4a;Tubb2a;Tubb2b;Tubb3;Tubb6;Vps4b
Module5_pips1	ribonucleoside_triphosphate_catabolic_process	1.44402e-05	0.000235738	14143	235	1371	44	1.93147	Adss;Arl1;Asna1;Atp2a2;Atp2c1;Atp5j;Atp5j2;Atp5k;Atp6v0b;Atp6v0c;Atp6v0d1;Atp6v1g1;Gnai3;Gnl2;Gnl3;Hras1;Itpa;Macf1;Mras;Msh6;Myh9;Ola1;Ppp2r4;Psmc2;Rab11a;Rab11b;Rab2a;Rab5c;Rac1;Rap1b;Rheb;Rhoa;Rras;Sept2;Smarca4;Smarca5;Srpr;Top2a;Tuba4a;Tubb2a;Tubb2b;Tubb3;Tubb6;Vps4b
Module5_pips1	mitotic_cell_cycle_checkpoint	1.48718e-05	0.000240826	14143	62	1371	18	2.99492	Bcat1;Ccnb1;Ccnd1;Ccng1;Cdkn1a;Csnk2a1;Foxo4;Hras1;Mad2l1;Mdm2;Nae1;Pcbp4;Plk2;Ppp2r5c;Top2a;Tpr;Trp53;Zwint
Module5_pips1	ribonucleotide_catabolic_process	1.54957e-05	0.000248923	14143	243	1371	45	1.91034	Adss;Arl1;Asna1;Atp2a2;Atp2c1;Atp5j;Atp5j2;Atp5k;Atp6v0b;Atp6v0c;Atp6v0d1;Atp6v1g1;Gnai3;Gnl2;Gnl3;Hprt;Hras1;Itpa;Macf1;Mras;Msh6;Myh9;Ola1;Ppp2r4;Psmc2;Rab11a;Rab11b;Rab2a;Rab5c;Rac1;Rap1b;Rheb;Rhoa;Rras;Sept2;Smarca4;Smarca5;Srpr;Top2a;Tuba4a;Tubb2a;Tubb2b;Tubb3;Tubb6;Vps4b
Module5_pips1	organic_substance_metabolic_process	1.6417e-05	0.000260216	14143	592	1371	89	1.55086	Adk;Adss;Ak2;Akr1b3;Akr7a5;Arl1;Asna1;Atic;Atp2a2;Atp2c1;Atp5j;Atp5j2;Atp5k;Atp6v0b;Atp6v0c;Atp6v0d1;Atp6v1g1;BC048355;Bgn;Cad;Cmah;Ctps;Dcakd;Ddost;Dhcr24;Dnmt1;Dtymk;Galnt1;Ganab;Gnai3;Gnl2;Gnl3;Guk1;Hprt;Hras1;Impdh2;Itpa;Krtcap2;Macf1;Mat2a;Mras;Msh6;Myh9;Nme1;Nme4;Nt5c;Nudt1;Ogt;Ola1;Pcmt1;Pfkl;Pfkp;Pnp;Porcn;Ppp2r4;Prkcsh;Prps1;Psen1;Psmc2;Rab11a;Rab11b;Rab2a;Rab5c;Rac1;Rap1b;Rheb;Rhoa;Rpn1…
Module5_pips1	cellular_localization	1.65422e-05	0.000260216	14143	1012	1371	138	1.4067	Aaas;Actr2;Actr3;Aim2;Akap12;Akt1;Alyref;Anxa1;Ap1s1;Ap2a1;Ap3s1;Apoe;App;Arcn1;Arl1;Arl6ip1;Aspscr1;Atp2c1;Bag6;Bak1;Bcap31;Birc5;Bub3;Ccdc23;Ccnb1;Cd24a;Cenpa;Cltb;Cltc;Copa;Copb1;Copb2;Copg;Copz1;Cpe;Cse1l;Cul3;Ddx39;Dpy30;Ehd1;Erp29;Exosc10;Fnta;Gabarapl2;Get4;Gipc1;Hspa4;Ipo4;Ipo7;Jup;Kdelr1;Klc1;Kpnb1;Lamtor2;Lman1;Lmna;Ltbp4;M6pr;Macf1;Mapk1;Mapk3;March5;Mdm2;Mff;Mrpl18;Mtx2;Mybbp1a;Myh9;N…
Module5_pips1	response_to_DNA_damage_stimulus	1.65874e-05	0.000260216	14143	413	1371	67	1.67351	Actl6a;Aen;Apex1;Ash2l;Bag6;Bcat1;Bccip;Ccnd1;Ccng1;Cdk9;Cdkn1a;Chaf1b;Cul4b;Ddx1;Eef1e1;Eya2;Foxo4;Gadd45a;H2afx;Hmox1;Huwe1;Lig1;Mapk1;Mapk3;Mcm7;Mcrs1;Mdm2;Morf4l2;Msh6;Nsmce1;Nudt1;Nupr1;Parp1;Pcbp4;Phlda3;Plk1;Ppp2r5c;Prpf19;Psen1;Rad21;Rad23b;Rbx1;Rpa1;Rpa3;Ruvbl1;Sfn;Sfr1;Smarca5;Smc4;Stra13;Stub1;Supt16h;Tipin;Top2a;Trp53;Ube2a;Ube2b;Ube2n;Ube2v1;Ube2v2;Ubr5;Uhrf1;Usp1;Usp10;Usp7;Xrcc5;Xr…
Module5_pips1	dicarboxylic_acid_metabolic_process	1.72685e-05	0.0002688	14143	36	1371	13	3.72516	Cs;Dld;Dlst;Got2;Idh3a;Idh3b;Idh3g;Mdh1;Pck2;Sdha;Sdhb;Sucla2;Suclg1
Module5_pips1	DNA-dependent_DNA_replication_initiation	1.84109e-05	0.000284377	14143	11	1371	7	6.56462	Ccne1;Mcm2;Mcm3;Mcm4;Mcm5;Mcm6;Mcm7
Module5_pips1	carbohydrate_derivative_catabolic_process	1.91069e-05	0.000292875	14143	290	1371	51	1.81416	Adss;Arl1;Asna1;Atp2a2;Atp2c1;Atp5j;Atp5j2;Atp5k;Atp6v0b;Atp6v0c;Atp6v0d1;Atp6v1g1;BC048355;Dhcr24;Gnai3;Gnl2;Gnl3;Hprt;Hras1;Itpa;Macf1;Mras;Msh6;Myh9;Nt5c;Nudt1;Ola1;Pnp;Ppp2r4;Psen1;Psmc2;Rab11a;Rab11b;Rab2a;Rab5c;Rac1;Rap1b;Rheb;Rhoa;Rras;Sept2;Smarca4;Smarca5;Srpr;Top2a;Tuba4a;Tubb2a;Tubb2b;Tubb3;Tubb6;Vps4b
Module5_pips1	chromosome_organization	2.05671e-05	0.000312869	14143	521	1371	80	1.584	0610010K14Rik;Acin1;Actl6a;Aebp2;Ash2l;Bag6;Bub3;Carm1;Ccnb1;Cdca8;Cdkn2a;Cenpa;Cenpv;Chaf1b;Chd3;Chd4;Chmp1a;Ctbp1;Ctcf;Dnajc2;Dnmt1;Dpy30;Eed;Ehmt2;Eya2;Ezh2;H2afx;H2afy;Hat1;Hdac1;Hdac2;Hdac3;Hjurp;Hmgn3;Huwe1;Itpa;Kat2a;Mad2l1;Mbd3;Mcm2;Mcrs1;Morf4l2;Msh6;Mta2;Nap1l4;Nasp;Ncapd2;Ncaph2;Ogt;Parp1;Phb;Pim3;Prmt5;Psrc1;Rad23b;Rnf2;Rpa1;Rrs1;Ruvbl1;Setd8;Skp1a;Smarca4;Smarca5;Smarce1;Smc4;Syce2;T…
Module5_pips1	protein_complex_subunit_organization	2.32462e-05	0.000350966	14143	490	1371	76	1.60001	2310016M24Rik;Adrm1;Adsl;Ahctf1;Anxa5;Apoa1bp;Arpc4;Ccnb1;Cenpa;Clpp;Ctnna1;Dpysl3;Ehd1;Etf1;Fbxo5;Glul;Gmnn;Gsn;H2-Ke2;Hmox1;Hprt;Hras1;Hsd17b10;Hspa4;Ict1;Ilk;Impdh2;Jup;Lamc1;Mapk3;Max;Mdm2;Mff;Mgp;Nacc1;Napa;Ndufs5;Ndufs7;Ndufs8;Nudt21;Nupr1;Ogt;Pam;Pfkl;Pfkp;Picalm;Ppp5c;Prkcsh;Prnp;Psmg1;Rbmxl1;Rrm1;Sept11;Sept2;Sept7;Sept9;Sh3glb1;Shmt2;Sqstm1;St13;Stom;Taf10;Tbca;Tfam;Tk1;Trp53;Tuba4a;Tub…
Module5_pips1	purine-containing_compound_catabolic_process	2.38005e-05	0.000356652	14143	262	1371	47	1.85055	Adss;Arl1;Asna1;Atp2a2;Atp2c1;Atp5j;Atp5j2;Atp5k;Atp6v0b;Atp6v0c;Atp6v0d1;Atp6v1g1;Gnai3;Gnl2;Gnl3;Hprt;Hras1;Itpa;Macf1;Mras;Msh6;Myh9;Nudt1;Ola1;Pnp;Ppp2r4;Psmc2;Rab11a;Rab11b;Rab2a;Rab5c;Rac1;Rap1b;Rheb;Rhoa;Rras;Sept2;Smarca4;Smarca5;Srpr;Top2a;Tuba4a;Tubb2a;Tubb2b;Tubb3;Tubb6;Vps4b
Module5_pips1	deoxyribonucleotide_metabolic_process	2.48758e-05	0.000370004	14143	23	1371	10	4.48514	Adk;Ak2;BC048355;Dtymk;Guk1;Nt5c;Nudt1;Pnp;Rrm1;Tyms
Module5_pips1	mitochondrial_transport	2.57051e-05	0.000379528	14143	53	1371	16	3.11421	Bak1;Hspa4;Mff;Mrpl18;Mtx2;Psen1;Samm50;Timm13;Timm8b;Tomm20;Tomm22;Tomm40;Tomm5;Trp53;Ucp2;Vdac1
Module5_pips1	purine_nucleotide_catabolic_process	2.77252e-05	0.000406366	14143	256	1371	46	1.85363	Adss;Arl1;Asna1;Atp2a2;Atp2c1;Atp5j;Atp5j2;Atp5k;Atp6v0b;Atp6v0c;Atp6v0d1;Atp6v1g1;Gnai3;Gnl2;Gnl3;Hprt;Hras1;Itpa;Macf1;Mras;Msh6;Myh9;Nudt1;Ola1;Ppp2r4;Psmc2;Rab11a;Rab11b;Rab2a;Rab5c;Rac1;Rap1b;Rheb;Rhoa;Rras;Sept2;Smarca4;Smarca5;Srpr;Top2a;Tuba4a;Tubb2a;Tubb2b;Tubb3;Tubb6;Vps4b
Module5_pips1	protein_localization_in_mitochondrion	3.08684e-05	0.000449158	14143	28	1371	11	4.05265	Hspa4;March5;Mff;Mtx2;Samm50;Timm13;Timm8b;Tomm20;Tomm22;Tomm40;Tomm5
Module5_pips1	nicotinamide_nucleotide_metabolic_process	3.18791e-05	0.000460527	14143	43	1371	14	3.35864	Dlst;Glyr1;Hibadh;Idh3a;Idh3b;Idh3g;Ldhb;Mdh1;Pgd;Pgls;Pnp;Prdx5;Tkt;Txnrd1
Module5_pips1	nucleoside_metabolic_process	3.24603e-05	0.000465573	14143	213	1371	40	1.93724	Adk;Adss;Arl1;Atic;Cad;Ctps;Dcakd;Dnmt1;Gnai3;Gnl2;Gnl3;Guk1;Hprt;Hras1;Impdh2;Mat2a;Mras;Nme1;Nme4;Pcmt1;Pnp;Prps1;Rab11a;Rab11b;Rab2a;Rab5c;Rac1;Rap1b;Rheb;Rhoa;Rras;Sept2;Srpr;Tk1;Tuba4a;Tubb2a;Tubb2b;Tubb3;Tubb6;Upp1
Module5_pips1	mitochondrion_organization	3.30621e-05	0.000470841	14143	170	1371	34	2.06317	2310016M24Rik;Akt1;Bak1;Bnip3l;Cd24a;Cdkn2a;Chchd3;Dap3;Fis1;Hspa4;Ict1;Mff;Mrpl12;Mrpl15;Mrpl17;Mtx2;Ndufs5;Ndufs7;Ndufs8;Poldip2;Prdx3;Rnf7;Samm50;Sfn;Ssbp1;Tfam;Timm13;Timm50;Timm8b;Tomm20;Tomm22;Tomm40;Tomm5;Trp53
Module5_pips1	localization	3.34418e-05	0.000472895	14143	2647	1371	313	1.21982	1190003J15Rik;Aaas;Actr2;Actr3;Agfg1;Ahctf1;Aim2;Aimp1;Akap12;Akt1;Alyref;Ano1;Anxa1;Anxa6;Ap1s1;Ap2a1;Ap3s1;Aplp1;Apoe;App;Arcn1;Arf3;Arf4;Arf5;Arhgef7;Arid5b;Arl1;Arl6ip1;Asna1;Aspscr1;Atox1;Atp1b3;Atp2a2;Atp2c1;Atp5g1;Atp5j;Atp5j2;Atp5k;Atp6v0b;Atp6v0c;Atp6v0d1;Atp6v0e;Atp6v1e1;Atp6v1f;Atp6v1g1;Bag6;Bak1;Bcap31;Birc5;Bub3;Canx;Ccdc23;Ccnb1;Ccnd1;Cd151;Cd24a;Cd44;Cd81;Cenpa;Cenpv;Chmp1a;Chmp2a;…
Module5_pips1	protein_targeting_to_membrane	3.8138e-05	0.000535532	14143	49	1371	15	3.15791	Arl6ip1;Hspa4;Macf1;Pacs1;Samm50;Spnb2;Srp14;Srp72;Srp9;Srpr;Ssr3;Timm13;Timm8b;Tmed2;Tomm22
Module5_pips1	protein_complex_assembly	3.96767e-05	0.000553269	14143	473	1371	73	1.59208	2310016M24Rik;Adrm1;Adsl;Ahctf1;Anxa5;Apoa1bp;Arpc4;Ccnb1;Cenpa;Clpp;Ctnna1;Dpysl3;Ehd1;Fbxo5;Glul;Gmnn;Gsn;H2-Ke2;Hmox1;Hprt;Hras1;Hsd17b10;Hspa4;Ilk;Impdh2;Jup;Lamc1;Mapk3;Max;Mdm2;Mff;Mgp;Nacc1;Ndufs5;Ndufs7;Ndufs8;Nudt21;Nupr1;Ogt;Pam;Pfkl;Pfkp;Picalm;Ppp5c;Prkcsh;Prnp;Psmg1;Rbmxl1;Rrm1;Sept11;Sept2;Sept7;Sept9;Sh3glb1;Shmt2;Sqstm1;St13;Stom;Taf10;Tbca;Tfam;Tk1;Trp53;Tuba4a;Tubb2a;Tubb2b;Tubb…
Module5_pips1	regulation_of_proteolysis	4.04938e-05	0.000560769	14143	130	1371	28	2.22187	Akt1;Apoe;Aurkaip1;Bag6;Csnk1d;Fbxo5;Gipc1;Hdac2;Hspbp1;Ltbp4;Mad2l1;Mdm2;Nr1h2;Ogt;Plk1;Psen1;Psmd14;Psme3;Rad23b;Serpinb6a;Stub1;Sumo1;Timp3;Ube2v2;Ubqln4;Ubxn1;Usp14;Usp5
Module5_pips1	protein_folding	4.17056e-05	0.000573595	14143	137	1371	29	2.18364	Aars;B2m;Bag1;Canx;Dnaja2;Dnajb11;Dnajb6;Dnajc7;Dnajc8;Fkbp10;Fkbp11;Fkbp8;Fkbp9;H2-Ke2;Hsph1;Pfdn2;Pfdn5;Ppic;Ppid;Ppie;Ppih;Ppil1;Ppp2r4;Ptges3;Sh3glb1;St13;Stub1;Trap1;Vbp1
Module5_pips1	pyridine-containing_compound_metabolic_process	4.26196e-05	0.000578245	14143	44	1371	14	3.28231	Dlst;Glyr1;Hibadh;Idh3a;Idh3b;Idh3g;Ldhb;Mdh1;Pgd;Pgls;Pnp;Prdx5;Tkt;Txnrd1
Module5_pips1	pyridine_nucleotide_metabolic_process	4.26196e-05	0.000578245	14143	44	1371	14	3.28231	Dlst;Glyr1;Hibadh;Idh3a;Idh3b;Idh3g;Ldhb;Mdh1;Pgd;Pgls;Pnp;Prdx5;Tkt;Txnrd1
Module5_pips1	posttranscriptional_regulation_of_gene_expression	4.45527e-05	0.000598767	14143	276	1371	48	1.79406	Aars;Aarsd1;Abcf1;Akt1;Apex1;Aplp1;App;Bag6;Caprin1;Carhsp1;Cdkn2a;Dhx9;Dpm3;Eif2a;Eif2b5;Eif2s1;Eif3b;Eif4a3;Eif4e;Eif4e2;Fxr1;Gipc1;Ifi30;Lsm14a;Magoh;Mapk1;Mapk3;Mdm2;Nckap1;Ndufa13;Ngdn;Pa2g4;Paip1;Paip2;Plk1;Poldip3;Pum2;Sarnp;Serp1;Srp14;Srp9;Srrt;Syncrip;Tardbp;Tbrg1;Tcf3;Ube2b;Usp7
Module5_pips1	regulation_of_interphase_of_mitotic_cell_cycle	4.47286e-05	0.000598767	14143	85	1371	21	2.54862	Apex1;Bcat1;Ccnd1;Ccng1;Cdkn1a;Cdkn2a;Cdt1;Chmp1a;Cul4b;Dbf4;Foxo4;Hras1;Mdm2;Nae1;Pcbp4;Ppp2r5c;Rcc1;Tipin;Top2a;Trp53;Ube2l3
Module5_pips1	respiratory_electron_transport_chain	4.53965e-05	0.000603404	14143	29	1371	11	3.9129	Dld;Mybbp1a;Ndufa5;Ndufb8;Ndufc2;Ndufs1;Ndufv2;Sdha;Sdhb;Sdhd;Uqcrc1
Module5_pips1	protein_complex_biogenesis	4.5676e-05	0.000603404	14143	475	1371	73	1.58538	2310016M24Rik;Adrm1;Adsl;Ahctf1;Anxa5;Apoa1bp;Arpc4;Ccnb1;Cenpa;Clpp;Ctnna1;Dpysl3;Ehd1;Fbxo5;Glul;Gmnn;Gsn;H2-Ke2;Hmox1;Hprt;Hras1;Hsd17b10;Hspa4;Ilk;Impdh2;Jup;Lamc1;Mapk3;Max;Mdm2;Mff;Mgp;Nacc1;Ndufs5;Ndufs7;Ndufs8;Nudt21;Nupr1;Ogt;Pam;Pfkl;Pfkp;Picalm;Ppp5c;Prkcsh;Prnp;Psmg1;Rbmxl1;Rrm1;Sept11;Sept2;Sept7;Sept9;Sh3glb1;Shmt2;Sqstm1;St13;Stom;Taf10;Tbca;Tfam;Tk1;Trp53;Tuba4a;Tubb2a;Tubb2b;Tubb…
Module5_pips1	isocitrate_metabolic_process	4.69149e-05	0.000610325	14143	6	1371	5	8.59652	Aco2;Idh2;Idh3a;Idh3b;Idh3g
Module5_pips1	establishment_of_localization_in_cell	4.69769e-05	0.000610325	14143	814	1371	113	1.43205	Aaas;Actr2;Aim2;Akap12;Akt1;Alyref;Anxa1;Ap1s1;Ap2a1;Ap3s1;App;Arcn1;Arl1;Arl6ip1;Aspscr1;Atp2c1;Bak1;Bcap31;Birc5;Ccdc23;Ccnb1;Cd24a;Cenpa;Cltb;Cltc;Copa;Copb1;Copb2;Copg;Copz1;Cse1l;Cul3;Ddx39;Dpy30;Ehd1;Erp29;Gabarapl2;Gipc1;Hspa4;Ipo4;Ipo7;Klc1;Kpnb1;Lman1;Lmna;Ltbp4;M6pr;Macf1;Mapk1;Mapk3;Mff;Mrpl18;Mtx2;Mybbp1a;Myh9;Napa;Nmd3;Nop58;Nxf1;Pabpn1;Pacs1;Pafah1b1;Pdcd6;Picalm;Pnp;Psen1;Psrc1;Rab…
Module5_pips1	mRNA_transport	4.71118e-05	0.000610325	14143	67	1371	18	2.77142	Ahctf1;Alyref;Ddx39;Eif4a3;G3bp2;Magoh;Myo1c;Nup62;Nup85;Nup88;Nup93;Nxf1;Pabpn1;Sec13;Slbp;Srsf10;Thoc7;Xpo1
Module5_pips1	protein_localization_to_organelle	4.81147e-05	0.000619323	14143	224	1371	41	1.88816	Akt1;Arl1;Bag6;Cenpa;Get4;Hspa4;Ipo4;Ipo7;Kdelr1;Kpnb1;Lmna;Macf1;Mapk1;Mapk3;March5;Mdm2;Mff;Mtx2;Nop58;Pacs1;Pes1;Plk1;Rad21;Samm50;Scarb2;Spnb2;Srp14;Srp72;Srp9;Srpr;Syne2;Timm13;Timm8b;Tnks2;Tomm20;Tomm22;Tomm40;Tomm5;Trp53;Vapa;Xpo1
Module5_pips1	cell_cycle_checkpoint	5.54358e-05	0.000709013	14143	112	1371	25	2.30264	Bcat1;Birc5;Bub3;Ccnb1;Ccnd1;Ccng1;Cdkn1a;Cdkn2a;Cdt1;Csnk2a1;Foxo4;H2afx;Hras1;Mad2l1;Mdm2;Nae1;Pcbp4;Plk1;Plk2;Ppp2r5c;Tipin;Top2a;Tpr;Trp53;Zwint
Module5_pips1	protein_targeting_to_mitochondrion	5.92979e-05	0.000753608	14143	25	1371	10	4.12633	Hspa4;Mff;Mtx2;Samm50;Timm13;Timm8b;Tomm20;Tomm22;Tomm40;Tomm5
Module5_pips1	regulation_of_protein_catabolic_process	6.06217e-05	0.000765587	14143	126	1371	27	2.21053	Akt1;Apoe;Bag6;Csnk1d;Cul4b;Fbxo5;Gipc1;Hspbp1;Mad2l1;Mdm2;Ndfip1;Plk1;Psen1;Psmd1;Psmd14;Psmd3;Psme3;Rad23b;Stub1;Sumo1;Timp3;Ube2v2;Ubqln4;Ubxn1;Usp14;Usp5;Xpo1
Module6_pips1	translation	3.18688e-46	3.76689e-43	14143	389	418	81	7.04532	Eef1a1;Eef1b2;Eef1d;Eef1g;Eef2;Eif1;Eif2s2;Eif3c;Eif3d;Eif3e;Eif3h;Eif3i;Eif3k;Eif3l;Eif3m;Eif4a1;Eif4a2;Eif4b;Eif4g1;Eif4g2;Eif5a;Gars;Kars;Lars2;Rbm3;Rpl10;Rpl11;Rpl13;Rpl14;Rpl15;Rpl18;Rpl18a;Rpl19;Rpl22;Rpl22l1;Rpl23;Rpl24;Rpl26;Rpl28;Rpl29;Rpl3;Rpl32;Rpl37a;Rpl38;Rpl39;Rpl4;Rpl6;Rpl7;Rpl8;Rpl9;Rplp0;Rplp1;Rplp2;Rpn2;Rps11;Rps14;Rps15;Rps15a;Rps16;Rps17;Rps18;Rps19;Rps2;Rps20;Rps21;Rps23;Rps2…
Module6_pips1	metabolic_process	3.96146e-33	2.34122e-30	14143	6288	418	305	1.64117	Adh5;Akr1a1;Aldh2;Aldoa;Anp32a;Aprt;Asns;Atf4;Atp1a1;Atp2a3;Atp5a1;Atp5b;Atp5c1;Atp5d;Atp5e;Atp5f1;Atp5g3;Atp5h;Atp5l;Atp5o;Atpif1;Banf1;Bax;Btf3;Bzw1;Calr;Capns1;Cct2;Cct3;Cct4;Cct5;Cct6a;Cct7;Cct8;Cdc42;Cdk1;Cdk4;Cfl1;Ckb;Cnbp;Cox4i1;Cox5a;Cox6a1;Cox6b1;Cox6c;Cox7c;Cox8a;Csda;Ctgf;Cth;Ctnnb1;Cyr61;Dctpp1;Ddb1;Ddx39b;Ddx3x;Ddx5;Dnaja1;Dynll1;Ebna1bp2;Edf1;Eef1a1;Eef1b2;Eef1d;Eef1g;Eef2;Eif1;Eif2…
Module6_pips1	cellular_metabolic_process	2.37405e-31	9.35377e-29	14143	5514	418	279	1.712	Adh5;Akr1a1;Aldoa;Anp32a;Aprt;Asns;Atf4;Atp1a1;Atp2a3;Atp5a1;Atp5b;Atp5c1;Atp5d;Atp5e;Atp5f1;Atp5g3;Atp5h;Atp5l;Atp5o;Atpif1;Banf1;Bax;Btf3;Bzw1;Calr;Cct2;Cct3;Cct4;Cct5;Cct6a;Cct7;Cct8;Cdc42;Cdk1;Cdk4;Cfl1;Ckb;Cnbp;Csda;Ctgf;Cth;Ctnnb1;Cyr61;Dctpp1;Ddb1;Ddx39b;Ddx3x;Ddx5;Dnaja1;Dynll1;Ebna1bp2;Edf1;Eef1a1;Eef1b2;Eef1d;Eef1g;Eef2;Eif1;Eif2s2;Eif3c;Eif3d;Eif3e;Eif3h;Eif3i;Eif3k;Eif3l;Eif3m;Eif4a1;…
Module6_pips1	cellular_process	6.8728e-31	2.03091e-28	14143	8865	418	366	1.39691	2700094K13Rik;Actb;Actg1;Actn4;Adh5;Akr1a1;Aldoa;Anp32a;Anp32b;Anxa2;Ap2m1;Ap2s1;Aprt;Arf1;Arhgdia;Asns;Atf4;Atp1a1;Atp2a3;Atp5a1;Atp5b;Atp5c1;Atp5d;Atp5e;Atp5f1;Atp5g3;Atp5h;Atp5l;Atp5o;Atpif1;Banf1;Bax;Btf3;Bzw1;Cacybp;Calm1;Calm2;Calr;Cap1;Capzb;Cct2;Cct3;Cct4;Cct5;Cct6a;Cct7;Cct8;Cd63;Cdc42;Cdk1;Cdk4;Cfl1;Ckb;Cks1b;Cldn11;Clic1;Cnbp;Cnn2;Cnn3;Cox6c;Cox7c;Crip1;Csda;Cst3;Ctgf;Cth;Ctnnb1;Cyr61;…
Module6_pips1	cellular_protein_metabolic_process	3.86381e-25	9.13404e-23	14143	2060	418	144	2.36516	Adh5;Bax;Calr;Cct2;Cct3;Cct4;Cct5;Cct6a;Cct7;Cct8;Cdk1;Cdk4;Cfl1;Cth;Ddb1;Dnaja1;Eef1a1;Eef1b2;Eef1d;Eef1g;Eef2;Eif1;Eif2s2;Eif3c;Eif3d;Eif3e;Eif3h;Eif3i;Eif3k;Eif3l;Eif3m;Eif4a1;Eif4a2;Eif4b;Eif4g1;Eif4g2;Eif5a;Fkbp1a;Fkbp3;Fkbp4;Fn1;Gars;Gnai2;Gpx1;Hsp90aa1;Hsp90ab1;Hsp90b1;Hspa5;Hspa8;Hspa9;Hspd1;Hspe1;Kars;Lars2;Mdh2;Morf4l1;Nedd4;Nme2;P4hb;Polr2f;Ppib;Ppp1ca;Prdx2;Prmt1;Psma4;Psma6;Psma7;Psm…
Module6_pips1	primary_metabolic_process	1.87358e-22	3.69095e-20	14143	5545	418	261	1.59259	Adh5;Akr1a1;Aldoa;Anp32a;Aprt;Asns;Atf4;Atp1a1;Atp2a3;Atp5a1;Atp5b;Atp5c1;Atp5d;Atp5e;Atp5f1;Atp5g3;Atp5h;Atp5l;Atp5o;Banf1;Bax;Btf3;Bzw1;Calr;Capns1;Cct2;Cct3;Cct4;Cct5;Cct6a;Cct7;Cct8;Cdc42;Cdk1;Cdk4;Cfl1;Cnbp;Csda;Cth;Ctnnb1;Dctpp1;Ddb1;Ddx39b;Ddx3x;Ddx5;Dnaja1;Dynll1;Ebna1bp2;Edf1;Eef1a1;Eef1b2;Eef1d;Eef1g;Eef2;Eif1;Eif2s2;Eif3c;Eif3d;Eif3e;Eif3h;Eif3i;Eif3k;Eif3l;Eif3m;Eif4a1;Eif4a2;Eif4b;Ei…
Module6_pips1	cellular_macromolecule_metabolic_process	4.77578e-22	8.06425e-20	14143	4112	418	214	1.76086	Adh5;Anp32a;Atf4;Banf1;Bax;Btf3;Bzw1;Calr;Cct2;Cct3;Cct4;Cct5;Cct6a;Cct7;Cct8;Cdk1;Cdk4;Cfl1;Cnbp;Csda;Cth;Ctnnb1;Ddb1;Ddx39b;Ddx5;Dnaja1;Dynll1;Ebna1bp2;Edf1;Eef1a1;Eef1b2;Eef1d;Eef1g;Eef2;Eif1;Eif2s2;Eif3c;Eif3d;Eif3e;Eif3h;Eif3i;Eif3k;Eif3l;Eif3m;Eif4a1;Eif4a2;Eif4b;Eif4g1;Eif4g2;Eif5a;Ewsr1;Fbl;Fkbp1a;Fkbp3;Fkbp4;Fn1;Gars;Gnai2;Gnas;Gpx1;H2afz;Hdgf;Hmga1;Hmgb1;Hmgb2;Hmgn1;Hnrnpa1;Hnrnpa2b1;Hn…
Module6_pips1	protein_metabolic_process	1.5714e-21	2.32175e-19	14143	2414	418	151	2.11644	Adh5;Bax;Calr;Capns1;Cct2;Cct3;Cct4;Cct5;Cct6a;Cct7;Cct8;Cdk1;Cdk4;Cfl1;Cth;Ddb1;Dnaja1;Eef1a1;Eef1b2;Eef1d;Eef1g;Eef2;Eif1;Eif2s2;Eif3c;Eif3d;Eif3e;Eif3h;Eif3i;Eif3k;Eif3l;Eif3m;Eif4a1;Eif4a2;Eif4b;Eif4g1;Eif4g2;Eif5a;Fkbp1a;Fkbp3;Fkbp4;Fn1;Gars;Gnai2;Gpx1;Hsp90aa1;Hsp90ab1;Hsp90b1;Hspa5;Hspa8;Hspa9;Hspd1;Hspe1;Kars;Lars2;Mdh2;Morf4l1;Myc;Nedd4;Nme2;P4hb;Park7;Polr2f;Ppib;Ppp1ca;Prdx2;Prmt1;Psma…
Module6_pips1	ribosomal_small_subunit_biogenesis	5.18222e-20	6.80598e-18	14143	23	418	16	23.5373	Npm1;Rps14;Rps15;Rps16;Rps17;Rps19;Rps2;Rps21;Rps24;Rps25;Rps28;Rps6;Rps7;Rps8;Rpsa;mt-Rnr1
Module6_pips1	gene_expression	1.30857e-19	1.54673e-17	14143	2319	418	143	2.08641	Anp32a;Atf4;Btf3;Bzw1;Cnbp;Csda;Ctnnb1;Ddx39b;Ddx5;Dynll1;Ebna1bp2;Edf1;Eef1a1;Eef1b2;Eef1d;Eef1g;Eef2;Eif1;Eif2s2;Eif3c;Eif3d;Eif3e;Eif3h;Eif3i;Eif3k;Eif3l;Eif3m;Eif4a1;Eif4a2;Eif4b;Eif4g1;Eif4g2;Eif5a;Ewsr1;Fbl;Gars;Hdgf;Hnrnpa1;Hnrnpa2b1;Hnrnpa3;Hnrnpab;Hnrnpd;Hnrnpf;Hnrnph1;Hnrnpk;Hnrnpl;Hnrnpm;Hnrnpu;Hspa8;Id1;Junb;Kars;Klf4;Lars2;Morf4l1;Myc;Naca;Nono;Pabpc1;Pcbp1;Phb2;Polr2f;Pou5f1;Rbbp4;R…
Module6_pips1	macromolecule_metabolic_process	2.79189e-19	3.00001e-17	14143	4465	418	219	1.65954	Adh5;Anp32a;Atf4;Banf1;Bax;Btf3;Bzw1;Calr;Capns1;Cct2;Cct3;Cct4;Cct5;Cct6a;Cct7;Cct8;Cdk1;Cdk4;Cfl1;Cnbp;Csda;Cth;Ctnnb1;Ddb1;Ddx39b;Ddx5;Dnaja1;Dynll1;Ebna1bp2;Edf1;Eef1a1;Eef1b2;Eef1d;Eef1g;Eef2;Eif1;Eif2s2;Eif3c;Eif3d;Eif3e;Eif3h;Eif3i;Eif3k;Eif3l;Eif3m;Eif4a1;Eif4a2;Eif4b;Eif4g1;Eif4g2;Eif5a;Ewsr1;Fbl;Fkbp1a;Fkbp3;Fkbp4;Fn1;Gars;Gnai2;Gnas;Gpx1;H2afz;Hdgf;Hmga1;Hmgb1;Hmgb2;Hmgn1;Hnrnpa1;Hnrnp…
Module6_pips1	biosynthetic_process	1.93075e-17	1.90179e-15	14143	2659	418	151	1.92143	Akr1a1;Aldoa;Anp32a;Aprt;Asns;Atf4;Atp1a1;Atp2a3;Atp5a1;Atp5b;Atp5c1;Atp5d;Atp5e;Atp5f1;Atp5g3;Atp5h;Atp5l;Atp5o;Btf3;Bzw1;Cnbp;Csda;Cth;Ctnnb1;Ddx5;Dynll1;Edf1;Eef1a1;Eef1b2;Eef1d;Eef1g;Eef2;Eif1;Eif2s2;Eif3c;Eif3d;Eif3e;Eif3h;Eif3i;Eif3k;Eif3l;Eif3m;Eif4a1;Eif4a2;Eif4b;Eif4g1;Eif4g2;Eif5a;Ewsr1;Gars;Gpi1;Hdgf;Hnrnpab;Hnrnpd;Hsp90aa1;Hspa8;Id1;Junb;Kars;Klf4;Lars2;Mif;Morf4l1;Myc;Naca;Nme2;Nono;…
Module6_pips1	cellular_biosynthetic_process	2.63807e-17	2.39862e-15	14143	2562	418	147	1.94135	Akr1a1;Aldoa;Anp32a;Aprt;Asns;Atf4;Atp1a1;Atp2a3;Atp5a1;Atp5b;Atp5c1;Atp5d;Atp5e;Atp5f1;Atp5g3;Atp5h;Atp5l;Atp5o;Btf3;Bzw1;Cnbp;Csda;Cth;Ctnnb1;Ddx5;Dynll1;Edf1;Eef1a1;Eef1b2;Eef1d;Eef1g;Eef2;Eif1;Eif2s2;Eif3c;Eif3d;Eif3e;Eif3h;Eif3i;Eif3k;Eif3l;Eif3m;Eif4a1;Eif4a2;Eif4b;Eif4g1;Eif4g2;Eif5a;Ewsr1;Gars;Gpi1;Hdgf;Hnrnpab;Hnrnpd;Hsp90aa1;Hspa8;Id1;Junb;Kars;Klf4;Lars2;Mif;Morf4l1;Myc;Naca;Nme2;Nono;…
Module6_pips1	ATP_synthesis_coupled_proton_transport	1.59745e-16	1.25879e-14	14143	15	418	12	27.0679	Atp5a1;Atp5b;Atp5c1;Atp5d;Atp5e;Atp5f1;Atp5g3;Atp5h;Atp5l;Atp5o;mt-Atp6;mt-Atp8
Module6_pips1	energy_coupled_proton_transport,_down_electrochemical_gradient	1.59745e-16	1.25879e-14	14143	15	418	12	27.0679	Atp5a1;Atp5b;Atp5c1;Atp5d;Atp5e;Atp5f1;Atp5g3;Atp5h;Atp5l;Atp5o;mt-Atp6;mt-Atp8
Module6_pips1	ribosome_biogenesis	2.97727e-15	2.19945e-13	14143	148	418	28	6.4012	Ebna1bp2;Fbl;Nop56;Npm1;Rpl11;Rpl14;Rpl24;Rpl26;Rpl35a;Rpl7;Rplp0;Rps14;Rps15;Rps16;Rps17;Rps18;Rps19;Rps2;Rps21;Rps24;Rps25;Rps28;Rps6;Rps7;Rps8;Rpsa;mt-Rnr1;mt-Rnr2
Module6_pips1	ATP_biosynthetic_process	2.8246e-14	1.96393e-12	14143	36	418	15	14.0979	Aldoa;Atp1a1;Atp2a3;Atp5a1;Atp5b;Atp5c1;Atp5d;Atp5e;Atp5f1;Atp5g3;Atp5h;Atp5l;Atp5o;mt-Atp6;mt-Atp8
Module6_pips1	purine_ribonucleoside_triphosphate_biosynthetic_process	4.98259e-14	3.2719e-12	14143	44	418	16	12.3036	Aldoa;Atp1a1;Atp2a3;Atp5a1;Atp5b;Atp5c1;Atp5d;Atp5e;Atp5f1;Atp5g3;Atp5h;Atp5l;Atp5o;Nme2;mt-Atp6;mt-Atp8
Module6_pips1	purine_nucleoside_triphosphate_biosynthetic_process	7.52472e-14	4.68117e-12	14143	45	418	16	12.0302	Aldoa;Atp1a1;Atp2a3;Atp5a1;Atp5b;Atp5c1;Atp5d;Atp5e;Atp5f1;Atp5g3;Atp5h;Atp5l;Atp5o;Nme2;mt-Atp6;mt-Atp8
Module6_pips1	macromolecule_biosynthetic_process	9.48477e-14	5.6055e-12	14143	2067	418	119	1.94792	Anp32a;Atf4;Btf3;Bzw1;Cnbp;Csda;Ctnnb1;Ddx5;Dynll1;Edf1;Eef1a1;Eef1b2;Eef1d;Eef1g;Eef2;Eif1;Eif2s2;Eif3c;Eif3d;Eif3e;Eif3h;Eif3i;Eif3k;Eif3l;Eif3m;Eif4a1;Eif4a2;Eif4b;Eif4g1;Eif4g2;Eif5a;Ewsr1;Gars;Hdgf;Hnrnpab;Hnrnpd;Hspa8;Id1;Junb;Kars;Klf4;Lars2;Morf4l1;Myc;Naca;Nono;Pcna;Phb2;Polr2f;Pou5f1;Rbbp4;Rbbp7;Rbm3;Rpl10;Rpl11;Rpl13;Rpl14;Rpl15;Rpl18;Rpl18a;Rpl19;Rpl22;Rpl22l1;Rpl23;Rpl24;Rpl26;Rpl28;…
Module6_pips1	cellular_macromolecule_biosynthetic_process	1.1143e-13	6.03314e-12	14143	2046	418	118	1.95138	Anp32a;Atf4;Btf3;Bzw1;Cnbp;Csda;Ctnnb1;Ddx5;Dynll1;Edf1;Eef1a1;Eef1b2;Eef1d;Eef1g;Eef2;Eif1;Eif2s2;Eif3c;Eif3d;Eif3e;Eif3h;Eif3i;Eif3k;Eif3l;Eif3m;Eif4a1;Eif4a2;Eif4b;Eif4g1;Eif4g2;Eif5a;Ewsr1;Gars;Hdgf;Hnrnpab;Hnrnpd;Hspa8;Id1;Junb;Kars;Klf4;Lars2;Morf4l1;Myc;Naca;Nono;Pcna;Phb2;Polr2f;Pou5f1;Rbbp4;Rbbp7;Rbm3;Rpl10;Rpl11;Rpl13;Rpl14;Rpl15;Rpl18;Rpl18a;Rpl19;Rpl22;Rpl22l1;Rpl23;Rpl24;Rpl26;Rpl28;…
Module6_pips1	ribonucleoside_triphosphate_biosynthetic_process	1.12292e-13	6.03314e-12	14143	46	418	16	11.7687	Aldoa;Atp1a1;Atp2a3;Atp5a1;Atp5b;Atp5c1;Atp5d;Atp5e;Atp5f1;Atp5g3;Atp5h;Atp5l;Atp5o;Nme2;mt-Atp6;mt-Atp8
Module6_pips1	ribonucleoprotein_complex_biogenesis	1.68214e-13	8.64473e-12	14143	199	418	30	5.10074	Ddx39b;Ebna1bp2;Eif3d;Fbl;Nop56;Npm1;Rpl11;Rpl14;Rpl24;Rpl26;Rpl35a;Rpl7;Rplp0;Rps14;Rps15;Rps16;Rps17;Rps18;Rps19;Rps2;Rps21;Rps24;Rps25;Rps28;Rps6;Rps7;Rps8;Rpsa;mt-Rnr1;mt-Rnr2
Module6_pips1	purine_ribonucleoside_triphosphate_metabolic_process	2.17309e-13	1.07025e-11	14143	273	418	35	4.33781	Aldoa;Atp1a1;Atp2a3;Atp5a1;Atp5b;Atp5c1;Atp5d;Atp5e;Atp5f1;Atp5g3;Atp5h;Atp5l;Atp5o;Cdc42;Ddx3x;Ddx5;Eef2;Gnai2;Gnas;Gnb1;Gnb2;Hsp90aa1;Hspa8;Nme2;Rab7;Ran;Ruvbl2;Tuba1a;Tuba1b;Tuba1c;Tubb4b;Tubb5;Vcp;mt-Atp6;mt-Atp8
Module6_pips1	nucleoside_triphosphate_metabolic_process	2.61007e-13	1.23404e-11	14143	290	418	36	4.2002	Aldoa;Atp1a1;Atp2a3;Atp5a1;Atp5b;Atp5c1;Atp5d;Atp5e;Atp5f1;Atp5g3;Atp5h;Atp5l;Atp5o;Cdc42;Dctpp1;Ddx3x;Ddx5;Eef2;Gnai2;Gnas;Gnb1;Gnb2;Hsp90aa1;Hspa8;Nme2;Rab7;Ran;Ruvbl2;Tuba1a;Tuba1b;Tuba1c;Tubb4b;Tubb5;Vcp;mt-Atp6;mt-Atp8
Module6_pips1	ribonucleoside_triphosphate_metabolic_process	3.01457e-13	1.37047e-11	14143	276	418	35	4.29066	Aldoa;Atp1a1;Atp2a3;Atp5a1;Atp5b;Atp5c1;Atp5d;Atp5e;Atp5f1;Atp5g3;Atp5h;Atp5l;Atp5o;Cdc42;Ddx3x;Ddx5;Eef2;Gnai2;Gnas;Gnb1;Gnb2;Hsp90aa1;Hspa8;Nme2;Rab7;Ran;Ruvbl2;Tuba1a;Tuba1b;Tuba1c;Tubb4b;Tubb5;Vcp;mt-Atp6;mt-Atp8
Module6_pips1	nucleoside_triphosphate_biosynthetic_process	3.49563e-13	1.53031e-11	14143	49	418	16	11.0481	Aldoa;Atp1a1;Atp2a3;Atp5a1;Atp5b;Atp5c1;Atp5d;Atp5e;Atp5f1;Atp5g3;Atp5h;Atp5l;Atp5o;Nme2;mt-Atp6;mt-Atp8
Module6_pips1	purine_nucleoside_triphosphate_metabolic_process	4.62987e-13	1.95447e-11	14143	280	418	35	4.22937	Aldoa;Atp1a1;Atp2a3;Atp5a1;Atp5b;Atp5c1;Atp5d;Atp5e;Atp5f1;Atp5g3;Atp5h;Atp5l;Atp5o;Cdc42;Ddx3x;Ddx5;Eef2;Gnai2;Gnas;Gnb1;Gnb2;Hsp90aa1;Hspa8;Nme2;Rab7;Ran;Ruvbl2;Tuba1a;Tuba1b;Tuba1c;Tubb4b;Tubb5;Vcp;mt-Atp6;mt-Atp8
Module6_pips1	purine_ribonucleotide_metabolic_process	4.86701e-13	1.98372e-11	14143	296	418	36	4.11506	Aldoa;Atp1a1;Atp2a3;Atp5a1;Atp5b;Atp5c1;Atp5d;Atp5e;Atp5f1;Atp5g3;Atp5h;Atp5l;Atp5o;Cdc42;Ddx3x;Ddx5;Eef2;Gnai2;Gnas;Gnb1;Gnb2;Hsp90aa1;Hspa8;Nme2;Paics;Rab7;Ran;Ruvbl2;Tuba1a;Tuba1b;Tuba1c;Tubb4b;Tubb5;Vcp;mt-Atp6;mt-Atp8
Module6_pips1	cellular_component_biogenesis_at_cellular_level	9.15424e-13	3.60677e-11	14143	212	418	30	4.78796	Ddx39b;Ebna1bp2;Eif3d;Fbl;Nop56;Npm1;Rpl11;Rpl14;Rpl24;Rpl26;Rpl35a;Rpl7;Rplp0;Rps14;Rps15;Rps16;Rps17;Rps18;Rps19;Rps2;Rps21;Rps24;Rps25;Rps28;Rps6;Rps7;Rps8;Rpsa;mt-Rnr1;mt-Rnr2
Module6_pips1	ribonucleotide_metabolic_process	1.61017e-12	6.13941e-11	14143	308	418	36	3.95473	Aldoa;Atp1a1;Atp2a3;Atp5a1;Atp5b;Atp5c1;Atp5d;Atp5e;Atp5f1;Atp5g3;Atp5h;Atp5l;Atp5o;Cdc42;Ddx3x;Ddx5;Eef2;Gnai2;Gnas;Gnb1;Gnb2;Hsp90aa1;Hspa8;Nme2;Paics;Rab7;Ran;Ruvbl2;Tuba1a;Tuba1b;Tuba1c;Tubb4b;Tubb5;Vcp;mt-Atp6;mt-Atp8
Module6_pips1	translational_initiation	3.59669e-12	1.32853e-10	14143	56	418	16	9.66712	Eif1;Eif2s2;Eif3c;Eif3d;Eif3e;Eif3h;Eif3i;Eif3k;Eif3l;Eif3m;Eif4a1;Eif4a2;Eif4b;Eif4g1;Eif4g2;Rps2
Module6_pips1	ribosomal_small_subunit_assembly	4.78155e-12	1.6435e-10	14143	9	418	8	30.0755	Rps14;Rps15;Rps17;Rps2;Rps25;Rps6;Rpsa;mt-Rnr1
Module6_pips1	purine_ribonucleotide_biosynthetic_process	4.83574e-12	1.6435e-10	14143	66	418	17	8.71506	Aldoa;Atp1a1;Atp2a3;Atp5a1;Atp5b;Atp5c1;Atp5d;Atp5e;Atp5f1;Atp5g3;Atp5h;Atp5l;Atp5o;Nme2;Paics;mt-Atp6;mt-Atp8
Module6_pips1	proton_transport	4.86654e-12	1.6435e-10	14143	57	418	16	9.49752	Atp5a1;Atp5b;Atp5c1;Atp5d;Atp5e;Atp5f1;Atp5g3;Atp5h;Atp5l;Atp5o;Cox6c;Cox7c;Uqcr11;mt-Atp6;mt-Atp8;mt-Co1
Module6_pips1	hydrogen_transport	6.54073e-12	2.14754e-10	14143	58	418	16	9.33377	Atp5a1;Atp5b;Atp5c1;Atp5d;Atp5e;Atp5f1;Atp5g3;Atp5h;Atp5l;Atp5o;Cox6c;Cox7c;Uqcr11;mt-Atp6;mt-Atp8;mt-Co1
Module6_pips1	nucleobase-containing_compound_metabolic_process	9.28975e-12	2.9677e-10	14143	2863	418	143	1.68997	Aldoa;Anp32a;Aprt;Atf4;Atp1a1;Atp2a3;Atp5a1;Atp5b;Atp5c1;Atp5d;Atp5e;Atp5f1;Atp5g3;Atp5h;Atp5l;Atp5o;Banf1;Bax;Btf3;Bzw1;Cdc42;Cdk1;Cnbp;Csda;Ctnnb1;Dctpp1;Ddb1;Ddx39b;Ddx3x;Ddx5;Dynll1;Ebna1bp2;Edf1;Eef2;Eif3e;Eif4g1;Eif4g2;Ewsr1;Fbl;Gars;Gnai2;Gnas;Gnb1;Gnb2;H2afz;Hdgf;Hmga1;Hmgb1;Hmgb2;Hmgn1;Hnrnpa1;Hnrnpa2b1;Hnrnpa3;Hnrnpab;Hnrnpd;Hnrnpf;Hnrnph1;Hnrnpk;Hnrnpl;Hnrnpm;Hnrnpu;Hsp90aa1;Hspa8;Hspd…
Module6_pips1	purine-containing_compound_metabolic_process	1.10257e-11	3.42957e-10	14143	380	418	39	3.47253	Aldoa;Aprt;Atp1a1;Atp2a3;Atp5a1;Atp5b;Atp5c1;Atp5d;Atp5e;Atp5f1;Atp5g3;Atp5h;Atp5l;Atp5o;Cdc42;Ddx3x;Ddx5;Eef2;Gars;Gnai2;Gnas;Gnb1;Gnb2;Hsp90aa1;Hspa8;Kars;Nme2;Paics;Rab7;Ran;Ruvbl2;Tuba1a;Tuba1b;Tuba1c;Tubb4b;Tubb5;Vcp;mt-Atp6;mt-Atp8
Module6_pips1	purine-containing_compound_biosynthetic_process	1.47533e-11	4.47138e-10	14143	102	418	20	6.6343	Aldoa;Aprt;Atp1a1;Atp2a3;Atp5a1;Atp5b;Atp5c1;Atp5d;Atp5e;Atp5f1;Atp5g3;Atp5h;Atp5l;Atp5o;Gars;Kars;Nme2;Paics;mt-Atp6;mt-Atp8
Module6_pips1	ribosome_assembly	1.6193e-11	4.78504e-10	14143	18	418	10	18.7972	Rpl24;Rps14;Rps15;Rps17;Rps2;Rps25;Rps6;Rpsa;mt-Rnr1;mt-Rnr2
Module6_pips1	RNA_processing	1.94796e-11	5.61581e-10	14143	478	418	44	3.11451	Ddx39b;Ddx5;Ebna1bp2;Fbl;Hnrnpa1;Hnrnpa2b1;Hnrnpa3;Hnrnpf;Hnrnph1;Hnrnpk;Hnrnpl;Hnrnpm;Hnrnpu;Nono;Pabpc1;Pcbp1;Rbm3;Rpl11;Rpl14;Rpl26;Rpl35a;Rpl7;Rps15;Rps16;Rps17;Rps19;Rps21;Rps24;Rps28;Rps6;Rps7;Rps8;Rpsa;Sf3b5;Sfpq;Snrnp70;Snrpb;Snrpd2;Snrpd3;Snrpe;Snrpg;U2af1;U2af2;Ybx1
Module6_pips1	nucleobase-containing_small_molecule_metabolic_process	2.42083e-11	6.8129e-10	14143	500	418	45	3.04514	Aldoa;Aprt;Atp1a1;Atp2a3;Atp5a1;Atp5b;Atp5c1;Atp5d;Atp5e;Atp5f1;Atp5g3;Atp5h;Atp5l;Atp5o;Cdc42;Dctpp1;Ddx3x;Ddx5;Eef2;Gars;Gnai2;Gnas;Gnb1;Gnb2;Hsp90aa1;Hspa8;Kars;Ldha;Mdh2;Nme2;Paics;Rab7;Ran;Rrm2;Ruvbl2;Taldo1;Tpi1;Tuba1a;Tuba1b;Tuba1c;Tubb4b;Tubb5;Vcp;mt-Atp6;mt-Atp8
Module6_pips1	cellular_nitrogen_compound_metabolic_process	2.69789e-11	7.41607e-10	14143	2988	418	146	1.65325	Aldoa;Anp32a;Aprt;Atf4;Atp1a1;Atp2a3;Atp5a1;Atp5b;Atp5c1;Atp5d;Atp5e;Atp5f1;Atp5g3;Atp5h;Atp5l;Atp5o;Banf1;Bax;Btf3;Bzw1;Cdc42;Cdk1;Cnbp;Csda;Ctnnb1;Dctpp1;Ddb1;Ddx39b;Ddx3x;Ddx5;Dynll1;Ebna1bp2;Edf1;Eef2;Eif3e;Eif4g1;Eif4g2;Ewsr1;Fbl;Gars;Gnai2;Gnas;Gnb1;Gnb2;H2afz;Hdgf;Hmga1;Hmgb1;Hmgb2;Hmgn1;Hnrnpa1;Hnrnpa2b1;Hnrnpa3;Hnrnpab;Hnrnpd;Hnrnpf;Hnrnph1;Hnrnpk;Hnrnpl;Hnrnpm;Hnrnpu;Hsp90aa1;Hspa8;Hspd…
Module6_pips1	nucleoside_triphosphate_catabolic_process	3.15379e-11	8.47223e-10	14143	243	418	30	4.17715	Atp1a1;Atp5a1;Atp5b;Atp5c1;Atp5d;Atp5e;Atp5f1;Atp5h;Atp5l;Atp5o;Cdc42;Dctpp1;Ddx3x;Ddx5;Eef2;Gnai2;Gnas;Gnb1;Gnb2;Hsp90aa1;Hspa8;Rab7;Ran;Ruvbl2;Tuba1a;Tuba1b;Tuba1c;Tubb4b;Tubb5;Vcp
Module6_pips1	ribonucleotide_biosynthetic_process	3.54982e-11	9.3242e-10	14143	74	418	17	7.77289	Aldoa;Atp1a1;Atp2a3;Atp5a1;Atp5b;Atp5c1;Atp5d;Atp5e;Atp5f1;Atp5g3;Atp5h;Atp5l;Atp5o;Nme2;Paics;mt-Atp6;mt-Atp8
Module6_pips1	purine_nucleotide_metabolic_process	4.09847e-11	1.05313e-09	14143	344	418	36	3.54086	Aldoa;Atp1a1;Atp2a3;Atp5a1;Atp5b;Atp5c1;Atp5d;Atp5e;Atp5f1;Atp5g3;Atp5h;Atp5l;Atp5o;Cdc42;Ddx3x;Ddx5;Eef2;Gnai2;Gnas;Gnb1;Gnb2;Hsp90aa1;Hspa8;Nme2;Paics;Rab7;Ran;Ruvbl2;Tuba1a;Tuba1b;Tuba1c;Tubb4b;Tubb5;Vcp;mt-Atp6;mt-Atp8
Module6_pips1	purine_ribonucleoside_triphosphate_catabolic_process	6.18226e-11	1.55477e-09	14143	234	418	29	4.19322	Atp1a1;Atp5a1;Atp5b;Atp5c1;Atp5d;Atp5e;Atp5f1;Atp5h;Atp5l;Atp5o;Cdc42;Ddx3x;Ddx5;Eef2;Gnai2;Gnas;Gnb1;Gnb2;Hsp90aa1;Hspa8;Rab7;Ran;Ruvbl2;Tuba1a;Tuba1b;Tuba1c;Tubb4b;Tubb5;Vcp
Module6_pips1	ribonucleoside_triphosphate_catabolic_process	6.86347e-11	1.69013e-09	14143	235	418	29	4.17537	Atp1a1;Atp5a1;Atp5b;Atp5c1;Atp5d;Atp5e;Atp5f1;Atp5h;Atp5l;Atp5o;Cdc42;Ddx3x;Ddx5;Eef2;Gnai2;Gnas;Gnb1;Gnb2;Hsp90aa1;Hspa8;Rab7;Ran;Ruvbl2;Tuba1a;Tuba1b;Tuba1c;Tubb4b;Tubb5;Vcp
Module6_pips1	protein_folding	8.73359e-11	2.10676e-09	14143	137	418	22	5.43335	Calr;Cct2;Cct3;Cct4;Cct5;Cct6a;Cct7;Cct8;Dnaja1;Fkbp1a;Fkbp3;Fkbp4;Hsp90aa1;Hsp90ab1;Hsp90b1;Hspa8;Hspa9;Hspd1;Hspe1;Ppib;Sep15;Tcp1
Module6_pips1	nucleoside_phosphate_metabolic_process	9.17419e-11	2.12625e-09	14143	463	418	42	3.06926	Aldoa;Atp1a1;Atp2a3;Atp5a1;Atp5b;Atp5c1;Atp5d;Atp5e;Atp5f1;Atp5g3;Atp5h;Atp5l;Atp5o;Cdc42;Dctpp1;Ddx3x;Ddx5;Eef2;Gnai2;Gnas;Gnb1;Gnb2;Hsp90aa1;Hspa8;Ldha;Mdh2;Nme2;Paics;Rab7;Ran;Rrm2;Ruvbl2;Taldo1;Tpi1;Tuba1a;Tuba1b;Tuba1c;Tubb4b;Tubb5;Vcp;mt-Atp6;mt-Atp8
Module6_pips1	nucleotide_metabolic_process	9.17419e-11	2.12625e-09	14143	463	418	42	3.06926	Aldoa;Atp1a1;Atp2a3;Atp5a1;Atp5b;Atp5c1;Atp5d;Atp5e;Atp5f1;Atp5g3;Atp5h;Atp5l;Atp5o;Cdc42;Dctpp1;Ddx3x;Ddx5;Eef2;Gnai2;Gnas;Gnb1;Gnb2;Hsp90aa1;Hspa8;Ldha;Mdh2;Nme2;Paics;Rab7;Ran;Rrm2;Ruvbl2;Taldo1;Tpi1;Tuba1a;Tuba1b;Tuba1c;Tubb4b;Tubb5;Vcp;mt-Atp6;mt-Atp8
Module6_pips1	purine_nucleoside_triphosphate_catabolic_process	9.35809e-11	2.12717e-09	14143	238	418	29	4.12274	Atp1a1;Atp5a1;Atp5b;Atp5c1;Atp5d;Atp5e;Atp5f1;Atp5h;Atp5l;Atp5o;Cdc42;Ddx3x;Ddx5;Eef2;Gnai2;Gnas;Gnb1;Gnb2;Hsp90aa1;Hspa8;Rab7;Ran;Ruvbl2;Tuba1a;Tuba1b;Tuba1c;Tubb4b;Tubb5;Vcp
Module6_pips1	oxidation-reduction_process	9.5633e-11	2.1328e-09	14143	682	418	53	2.6294	Adh5;Akr1a1;Aldh2;Bax;Cox4i1;Cox5a;Cox6a1;Cox6b1;Cox6c;Cox7c;Cox8a;Etfb;Fth1;Gapdh;Glrx3;Gnas;Gpx1;Gpx4;Ldha;Mdh2;Ndufa4;Ndufa7;P4hb;Park7;Pdia3;Phgdh;Ppp1ca;Prdx1;Prdx2;Rrm2;Sep15;Sod1;Taldo1;Tpi1;Txn1;Uqcr10;Uqcr11;Uqcrh;Vat1;Ywhae;Ywhaq;mt-Atp8;mt-Co1;mt-Co2;mt-Co3;mt-Cytb;mt-Nd1;mt-Nd2;mt-Nd3;mt-Nd4;mt-Nd4l;mt-Nd5;mt-Nd6
Module6_pips1	purine_ribonucleotide_catabolic_process	1.03648e-10	2.26874e-09	14143	239	418	29	4.10549	Atp1a1;Atp5a1;Atp5b;Atp5c1;Atp5d;Atp5e;Atp5f1;Atp5h;Atp5l;Atp5o;Cdc42;Ddx3x;Ddx5;Eef2;Gnai2;Gnas;Gnb1;Gnb2;Hsp90aa1;Hspa8;Rab7;Ran;Ruvbl2;Tuba1a;Tuba1b;Tuba1c;Tubb4b;Tubb5;Vcp
Module6_pips1	ribonucleotide_catabolic_process	1.55087e-10	3.33297e-09	14143	243	418	29	4.03791	Atp1a1;Atp5a1;Atp5b;Atp5c1;Atp5d;Atp5e;Atp5f1;Atp5h;Atp5l;Atp5o;Cdc42;Ddx3x;Ddx5;Eef2;Gnai2;Gnas;Gnb1;Gnb2;Hsp90aa1;Hspa8;Rab7;Ran;Ruvbl2;Tuba1a;Tuba1b;Tuba1c;Tubb4b;Tubb5;Vcp
Module6_pips1	ATP_metabolic_process	1.81158e-10	3.82373e-09	14143	129	418	21	5.50801	Aldoa;Atp1a1;Atp2a3;Atp5a1;Atp5b;Atp5c1;Atp5d;Atp5e;Atp5f1;Atp5g3;Atp5h;Atp5l;Atp5o;Ddx3x;Ddx5;Hsp90aa1;Hspa8;Ruvbl2;Vcp;mt-Atp6;mt-Atp8
Module6_pips1	nitrogen_compound_metabolic_process	2.31432e-10	4.79917e-09	14143	3074	418	146	1.60699	Aldoa;Anp32a;Aprt;Atf4;Atp1a1;Atp2a3;Atp5a1;Atp5b;Atp5c1;Atp5d;Atp5e;Atp5f1;Atp5g3;Atp5h;Atp5l;Atp5o;Banf1;Bax;Btf3;Bzw1;Cdc42;Cdk1;Cnbp;Csda;Ctnnb1;Dctpp1;Ddb1;Ddx39b;Ddx3x;Ddx5;Dynll1;Ebna1bp2;Edf1;Eef2;Eif3e;Eif4g1;Eif4g2;Ewsr1;Fbl;Gars;Gnai2;Gnas;Gnb1;Gnb2;H2afz;Hdgf;Hmga1;Hmgb1;Hmgb2;Hmgn1;Hnrnpa1;Hnrnpa2b1;Hnrnpa3;Hnrnpab;Hnrnpd;Hnrnpf;Hnrnph1;Hnrnpk;Hnrnpl;Hnrnpm;Hnrnpu;Hsp90aa1;Hspa8;Hspd…
Module6_pips1	purine_nucleotide_catabolic_process	5.41215e-10	1.10296e-08	14143	256	418	29	3.83286	Atp1a1;Atp5a1;Atp5b;Atp5c1;Atp5d;Atp5e;Atp5f1;Atp5h;Atp5l;Atp5o;Cdc42;Ddx3x;Ddx5;Eef2;Gnai2;Gnas;Gnb1;Gnb2;Hsp90aa1;Hspa8;Rab7;Ran;Ruvbl2;Tuba1a;Tuba1b;Tuba1c;Tubb4b;Tubb5;Vcp
Module6_pips1	cellular_component_biogenesis	5.92892e-10	1.18779e-08	14143	1076	418	69	2.16971	Actg1;Actn4;Bax;Calr;Capzb;Cct2;Cdc42;Cdk1;Cth;Ctnnb1;Dctpp1;Ddx39b;Ebna1bp2;Eif3d;Fbl;Fkbp1a;Fkbp4;Flna;Fn1;Fscn1;H2afz;Hmga1;Hsp90aa1;Hsp90b1;Itgb1;Mif;Nap1l1;Nme2;Nop56;Npm1;Pomp;Rbbp4;Rpl11;Rpl14;Rpl24;Rpl26;Rpl35a;Rpl7;Rplp0;Rps14;Rps15;Rps16;Rps17;Rps18;Rps19;Rps2;Rps21;Rps24;Rps25;Rps28;Rps6;Rps7;Rps8;Rpsa;Rrm2;Set;Tpm1;Trim28;Tuba1a;Tuba1b;Tuba1c;Tubb4b;Tubb5;Ube2s;Uqcrb;Uqcrh;Vcp;mt-Rnr1…
Module6_pips1	nucleotide_catabolic_process	6.77642e-10	1.33496e-08	14143	275	418	30	3.69108	Atp1a1;Atp5a1;Atp5b;Atp5c1;Atp5d;Atp5e;Atp5f1;Atp5h;Atp5l;Atp5o;Cdc42;Dctpp1;Ddx3x;Ddx5;Eef2;Gnai2;Gnas;Gnb1;Gnb2;Hsp90aa1;Hspa8;Rab7;Ran;Ruvbl2;Tuba1a;Tuba1b;Tuba1c;Tubb4b;Tubb5;Vcp
Module6_pips1	rRNA_processing	8.07496e-10	1.56469e-08	14143	101	418	18	6.02999	Ebna1bp2;Fbl;Rpl11;Rpl14;Rpl26;Rpl35a;Rpl7;Rps15;Rps16;Rps17;Rps19;Rps21;Rps24;Rps28;Rps6;Rps7;Rps8;Rpsa
Module6_pips1	nucleobase-containing_compound_biosynthetic_process	8.6364e-10	1.64649e-08	14143	140	418	21	5.07524	Aldoa;Aprt;Atp1a1;Atp2a3;Atp5a1;Atp5b;Atp5c1;Atp5d;Atp5e;Atp5f1;Atp5g3;Atp5h;Atp5l;Atp5o;Gars;Kars;Nme2;Paics;Rrm2;mt-Atp6;mt-Atp8
Module6_pips1	purine-containing_compound_catabolic_process	9.36098e-10	1.75515e-08	14143	262	418	29	3.74509	Atp1a1;Atp5a1;Atp5b;Atp5c1;Atp5d;Atp5e;Atp5f1;Atp5h;Atp5l;Atp5o;Cdc42;Ddx3x;Ddx5;Eef2;Gnai2;Gnas;Gnb1;Gnb2;Hsp90aa1;Hspa8;Rab7;Ran;Ruvbl2;Tuba1a;Tuba1b;Tuba1c;Tubb4b;Tubb5;Vcp
Module6_pips1	cellular_catabolic_process	9.50334e-10	1.75515e-08	14143	926	418	62	2.26541	Adh5;Akr1a1;Atp1a1;Atp5a1;Atp5b;Atp5c1;Atp5d;Atp5e;Atp5f1;Atp5h;Atp5l;Atp5o;Bax;Cdc42;Dctpp1;Ddb1;Ddx3x;Ddx5;Eef2;Eif3e;Gnai2;Gnas;Gnb1;Gnb2;Gpi1;Gpx1;Gpx4;Hsp90aa1;Hsp90b1;Hspa5;Hspa8;Lsm7;Mdh2;Myc;Nedd4;Pabpc1;Park7;Prdx1;Prdx2;Psma4;Psma6;Psma7;Psmb1;Psmb3;Psmb4;Psmb5;Psmb6;Psmb7;Rab7;Ran;Ruvbl2;Sec61b;Sod1;Tuba1a;Tuba1b;Tuba1c;Tubb4b;Tubb5;Ube2d3;Ube2i;Ube2s;Vcp
Module6_pips1	heterocycle_metabolic_process	1.25877e-09	2.28903e-08	14143	544	418	44	2.73665	Aldoa;Aprt;Atp1a1;Atp2a3;Atp5a1;Atp5b;Atp5c1;Atp5d;Atp5e;Atp5f1;Atp5g3;Atp5h;Atp5l;Atp5o;Cdc42;Ddx3x;Ddx5;Eef2;Gars;Gnai2;Gnas;Gnb1;Gnb2;Hsp90aa1;Hspa8;Kars;Ldha;Mdh2;Nme2;P4hb;Paics;Rab7;Ran;Ruvbl2;Taldo1;Tpi1;Tuba1a;Tuba1b;Tuba1c;Tubb4b;Tubb5;Vcp;mt-Atp6;mt-Atp8
Module6_pips1	rRNA_metabolic_process	1.32447e-09	2.372e-08	14143	104	418	18	5.85605	Ebna1bp2;Fbl;Rpl11;Rpl14;Rpl26;Rpl35a;Rpl7;Rps15;Rps16;Rps17;Rps19;Rps21;Rps24;Rps28;Rps6;Rps7;Rps8;Rpsa
Module6_pips1	ribosomal_large_subunit_biogenesis	1.40025e-09	2.4703e-08	14143	14	418	8	19.3342	Npm1;Rpl11;Rpl14;Rpl24;Rpl26;Rpl35a;Rpl7;mt-Rnr2
Module6_pips1	purine_nucleotide_biosynthetic_process	1.8934e-09	3.29117e-08	14143	94	418	17	6.11908	Aldoa;Atp1a1;Atp2a3;Atp5a1;Atp5b;Atp5c1;Atp5d;Atp5e;Atp5f1;Atp5g3;Atp5h;Atp5l;Atp5o;Nme2;Paics;mt-Atp6;mt-Atp8
Module6_pips1	carbohydrate_derivative_catabolic_process	2.42138e-09	4.14793e-08	14143	290	418	30	3.50016	Atp1a1;Atp5a1;Atp5b;Atp5c1;Atp5d;Atp5e;Atp5f1;Atp5h;Atp5l;Atp5o;Cdc42;Ddx3x;Ddx5;Eef2;Fkbp1a;Gnai2;Gnas;Gnb1;Gnb2;Hsp90aa1;Hspa8;Rab7;Ran;Ruvbl2;Tuba1a;Tuba1b;Tuba1c;Tubb4b;Tubb5;Vcp
Module6_pips1	nucleobase-containing_compound_catabolic_process	2.62728e-09	4.43635e-08	14143	291	418	30	3.48814	Atp1a1;Atp5a1;Atp5b;Atp5c1;Atp5d;Atp5e;Atp5f1;Atp5h;Atp5l;Atp5o;Cdc42;Dctpp1;Ddx3x;Ddx5;Eef2;Gnai2;Gnas;Gnb1;Gnb2;Hsp90aa1;Hspa8;Rab7;Ran;Ruvbl2;Tuba1a;Tuba1b;Tuba1c;Tubb4b;Tubb5;Vcp
Module6_pips1	catabolic_process	3.20056e-09	5.32825e-08	14143	1096	418	68	2.09925	Adh5;Akr1a1;Aldoa;Atp1a1;Atp5a1;Atp5b;Atp5c1;Atp5d;Atp5e;Atp5f1;Atp5h;Atp5l;Atp5o;Bax;Cdc42;Dctpp1;Ddb1;Ddx3x;Ddx5;Eef2;Eif3e;Fkbp1a;Gnai2;Gnas;Gnb1;Gnb2;Gpi1;Gpx1;Gpx4;Hsp90aa1;Hsp90b1;Hspa5;Hspa8;Ldha;Lsm7;Mdh2;Myc;Nedd4;Pabpc1;Park7;Pgk1;Prdx1;Prdx2;Psma4;Psma6;Psma7;Psmb1;Psmb3;Psmb4;Psmb5;Psmb6;Psmb7;Rab7;Ran;Ruvbl2;Sec61b;Sod1;Taldo1;Tpi1;Tuba1a;Tuba1b;Tuba1c;Tubb4b;Tubb5;Ube2d3;Ube2i;Ube2s…
Module6_pips1	generation_of_precursor_metabolites_and_energy	4.59052e-09	7.53611e-08	14143	214	418	25	3.95268	Aldoa;Bax;Etfb;Gnas;Gpi1;Ldha;Mdh2;Ndufa4;Ndufa7;Pgk1;Ppp1ca;Tpi1;Txn1;Uqcr10;Uqcr11;Uqcrh;mt-Co1;mt-Co2;mt-Cytb;mt-Nd1;mt-Nd2;mt-Nd3;mt-Nd4;mt-Nd5;mt-Nd6
Module6_pips1	cellular_macromolecular_complex_assembly	5.69761e-09	9.22544e-08	14143	266	418	28	3.56157	Calr;Cct2;Ddx39b;Eif3d;Fkbp1a;Fkbp4;H2afz;Hsp90aa1;Nap1l1;Npm1;Pomp;Rpl24;Rps14;Rps15;Rps17;Rps2;Rps25;Rps6;Rpsa;Set;Tuba1a;Tuba1b;Tuba1c;Tubb4b;Tubb5;Ube2s;mt-Rnr1;mt-Rnr2
Module6_pips1	translational_elongation	6.49139e-09	1.03687e-07	14143	56	418	13	7.85454	Eef1a1;Eef1b2;Eef1d;Eef1g;Eef2;Eif5a;Rplp0;Rplp1;Rplp2;Rps17;Rps21;Rps24;Rps8
Module6_pips1	cellular_nitrogen_compound_catabolic_process	6.78906e-09	1.06996e-07	14143	303	418	30	3.34999	Atp1a1;Atp5a1;Atp5b;Atp5c1;Atp5d;Atp5e;Atp5f1;Atp5h;Atp5l;Atp5o;Cdc42;Dctpp1;Ddx3x;Ddx5;Eef2;Gnai2;Gnas;Gnb1;Gnb2;Hsp90aa1;Hspa8;Rab7;Ran;Ruvbl2;Tuba1a;Tuba1b;Tuba1c;Tubb4b;Tubb5;Vcp
Module6_pips1	heterocycle_catabolic_process	1.13908e-08	1.77156e-07	14143	292	418	29	3.36032	Atp1a1;Atp5a1;Atp5b;Atp5c1;Atp5d;Atp5e;Atp5f1;Atp5h;Atp5l;Atp5o;Cdc42;Ddx3x;Ddx5;Eef2;Gnai2;Gnas;Gnb1;Gnb2;Hsp90aa1;Hspa8;Rab7;Ran;Ruvbl2;Tuba1a;Tuba1b;Tuba1c;Tubb4b;Tubb5;Vcp
Module6_pips1	ATP_catabolic_process	2.62428e-08	4.02844e-07	14143	98	418	16	5.52407	Atp1a1;Atp5a1;Atp5b;Atp5c1;Atp5d;Atp5e;Atp5f1;Atp5h;Atp5l;Atp5o;Ddx3x;Ddx5;Hsp90aa1;Hspa8;Ruvbl2;Vcp
Module6_pips1	cellular_nitrogen_compound_biosynthetic_process	3.01509e-08	4.56903e-07	14143	218	418	24	3.72495	Aldoa;Aprt;Atp1a1;Atp2a3;Atp5a1;Atp5b;Atp5c1;Atp5d;Atp5e;Atp5f1;Atp5g3;Atp5h;Atp5l;Atp5o;Gars;Hsp90aa1;Kars;Nme2;Odc1;Paics;Rrm2;Srm;mt-Atp6;mt-Atp8
Module6_pips1	cellular_macromolecular_complex_subunit_organization	4.3116e-08	6.45102e-07	14143	310	418	29	3.1652	Calr;Cct2;Ddx39b;Eif3d;Fkbp1a;Fkbp4;H2afz;Hsp90aa1;Nap1l1;Npm1;Pomp;Rpl24;Rps14;Rps15;Rps17;Rps2;Rps25;Rps6;Rpsa;Set;Stmn1;Tuba1a;Tuba1b;Tuba1c;Tubb4b;Tubb5;Ube2s;mt-Rnr1;mt-Rnr2
Module6_pips1	nucleotide_biosynthetic_process	5.68551e-08	8.40035e-07	14143	131	418	18	4.64907	Aldoa;Atp1a1;Atp2a3;Atp5a1;Atp5b;Atp5c1;Atp5d;Atp5e;Atp5f1;Atp5g3;Atp5h;Atp5l;Atp5o;Nme2;Paics;Rrm2;mt-Atp6;mt-Atp8
Module6_pips1	carbohydrate_derivative_metabolic_process	8.77545e-08	1.28057e-06	14143	562	418	41	2.46838	Aldoa;Aprt;Atp1a1;Atp5a1;Atp5b;Atp5c1;Atp5d;Atp5e;Atp5f1;Atp5h;Atp5l;Atp5o;Bax;Cdc42;Ddx3x;Ddx5;Eef2;Fkbp1a;Gars;Gnai2;Gnas;Gnb1;Gnb2;Gpi1;Hsp90aa1;Hspa8;Kars;Nme2;Rab7;Ran;Rpn2;Rrm2;Ruvbl2;Taldo1;Tpi1;Tuba1a;Tuba1b;Tuba1c;Tubb4b;Tubb5;Vcp
Module6_pips1	RNA_splicing	9.99491e-08	1.44073e-06	14143	215	418	23	3.61955	Ddx39b;Ddx5;Hnrnpa1;Hnrnpa2b1;Hnrnpa3;Hnrnpf;Hnrnph1;Hnrnpk;Hnrnpm;Hnrnpu;Nono;Pabpc1;Sf3b5;Sfpq;Snrnp70;Snrpb;Snrpd2;Snrpd3;Snrpe;Snrpg;U2af1;U2af2;Ybx1
Module6_pips1	electron_transport_chain	1.07533e-07	1.53138e-06	14143	108	418	16	5.01258	Etfb;Ndufa4;Ndufa7;Txn1;Uqcr10;Uqcr11;Uqcrh;mt-Co1;mt-Co2;mt-Cytb;mt-Nd1;mt-Nd2;mt-Nd3;mt-Nd4;mt-Nd5;mt-Nd6
Module6_pips1	heterocycle_biosynthetic_process	2.35399e-07	3.31239e-06	14143	175	418	20	3.86685	Aldoa;Aprt;Atp1a1;Atp2a3;Atp5a1;Atp5b;Atp5c1;Atp5d;Atp5e;Atp5f1;Atp5g3;Atp5h;Atp5l;Atp5o;Gars;Kars;Nme2;Paics;mt-Atp6;mt-Atp8
Module6_pips1	organic_substance_metabolic_process	3.54548e-07	4.93031e-06	14143	592	418	41	2.3433	Aldoa;Aprt;Atp1a1;Atp5a1;Atp5b;Atp5c1;Atp5d;Atp5e;Atp5f1;Atp5h;Atp5l;Atp5o;Bax;Cdc42;Ddx3x;Ddx5;Eef2;Fkbp1a;Gars;Gnai2;Gnas;Gnb1;Gnb2;Gpi1;Hsp90aa1;Hspa8;Kars;Nme2;Rab7;Ran;Rpn2;Rrm2;Ruvbl2;Taldo1;Tpi1;Tuba1a;Tuba1b;Tuba1c;Tubb4b;Tubb5;Vcp
Module6_pips1	cellular_component_assembly_at_cellular_level	5.42999e-07	7.46308e-06	14143	624	418	42	2.27735	Actg1;Actn4;Calr;Capzb;Cct2;Cdc42;Ctnnb1;Ddx39b;Eif3d;Fkbp1a;Fkbp4;Flna;Fn1;Fscn1;H2afz;Hmga1;Hsp90aa1;Hsp90b1;Itgb1;Nap1l1;Npm1;Pomp;Rbbp4;Rpl24;Rps14;Rps15;Rps17;Rps2;Rps25;Rps6;Rpsa;Set;Tpm1;Tuba1a;Tuba1b;Tuba1c;Tubb4b;Tubb5;Ube2s;Vcp;mt-Rnr1;mt-Rnr2
Module6_pips1	posttranscriptional_regulation_of_gene_expression	6.88634e-07	9.35592e-06	14143	276	418	25	3.06476	Calr;Cdc42;Eif3k;Eif4ebp1;Eif4g1;Eif4g2;Eif5a;Flna;Gnb2l1;Hnrnpa0;Hnrnpd;Hnrnpu;Hspd1;Id1;Npm1;Park7;Pcbp1;Ppp1ca;Rbm3;Rps14;Rps27l;Rps4x;Rps5;Thbs1;Ybx1
Module6_pips1	negative_regulation_of_cell_death	7.46406e-07	1.00256e-05	14143	521	418	37	2.40286	Asns;Bax;Cacybp;Cdk1;Csda;Cst3;Cth;Ctnnb1;Cyr61;Eif5a;Fn1;Fth1;Gpi1;Gpx1;Gstp1;Hsp90ab1;Hsp90b1;Hspa5;Hspb1;Hspd1;Mif;Mt1;Myc;Nme2;Park7;Prdx2;Ptma;Rps6;Serpine1;Set;Slc25a4;Sod1;Spp1;Thbs1;Timp1;Tpt1;Ybx1
Module6_pips1	ribonucleoprotein_complex_assembly	8.55833e-07	1.13662e-05	14143	70	418	12	5.80027	Ddx39b;Eif3d;Rpl24;Rps14;Rps15;Rps17;Rps2;Rps25;Rps6;Rpsa;mt-Rnr1;mt-Rnr2
Module6_pips1	mRNA_processing	9.61018e-07	1.26214e-05	14143	281	418	25	3.01022	Ddx39b;Ddx5;Hnrnpa1;Hnrnpa2b1;Hnrnpa3;Hnrnpf;Hnrnph1;Hnrnpk;Hnrnpl;Hnrnpm;Hnrnpu;Nono;Pabpc1;Pcbp1;Sf3b5;Sfpq;Snrnp70;Snrpb;Snrpd2;Snrpd3;Snrpe;Snrpg;U2af1;U2af2;Ybx1
Module6_pips1	ADP_biosynthetic_process	1.14592e-06	1.48843e-05	14143	8	418	5	21.1468	Atp5a1;Atp5b;Atp5c1;Atp5d;Atp5e
Module6_pips1	mRNA_metabolic_process	1.43094e-06	1.83845e-05	14143	326	418	27	2.80228	Ddx39b;Ddx5;Eif3e;Hnrnpa1;Hnrnpa2b1;Hnrnpa3;Hnrnpf;Hnrnph1;Hnrnpk;Hnrnpl;Hnrnpm;Hnrnpu;Lsm7;Nono;Pabpc1;Pcbp1;Sf3b5;Sfpq;Snrnp70;Snrpb;Snrpd2;Snrpd3;Snrpe;Snrpg;U2af1;U2af2;Ybx1
Module6_pips1	small_molecule_metabolic_process	1.52864e-06	1.94251e-05	14143	1159	418	63	1.83917	Adh5;Akr1a1;Aldoa;Aprt;Asns;Atp1a1;Atp2a3;Atp5a1;Atp5b;Atp5c1;Atp5d;Atp5e;Atp5f1;Atp5g3;Atp5h;Atp5l;Atp5o;Cdc42;Cth;Dctpp1;Ddx3x;Ddx5;Eef2;Eif5a;Gars;Gnai2;Gnas;Gnb1;Gnb2;Gpx1;Gpx4;Gsta4;Gstp1;Hsp90aa1;Hspa8;Kars;Lars2;Ldha;Mdh2;Mif;Nme2;P4hb;Paics;Pdia3;Phgdh;Psat1;Rab7;Ran;Rrm2;Ruvbl2;Sars;Sod1;Taldo1;Tpi1;Tuba1a;Tuba1b;Tuba1c;Tubb4b;Tubb5;Txn1;Vcp;mt-Atp6;mt-Atp8
Module6_pips1	macromolecular_complex_assembly	1.54481e-06	1.94251e-05	14143	604	418	40	2.24072	Bax;Calr;Cct2;Cdk1;Cth;Ctnnb1;Dctpp1;Ddx39b;Eif3d;Fkbp1a;Fkbp4;H2afz;Hsp90aa1;Mif;Nap1l1;Nme2;Npm1;Pomp;Rpl24;Rps14;Rps15;Rps17;Rps2;Rps25;Rps6;Rpsa;Rrm2;Set;Trim28;Tuba1a;Tuba1b;Tuba1c;Tubb4b;Tubb5;Ube2s;Uqcrb;Uqcrh;Vcp;mt-Rnr1;mt-Rnr2
Module6_pips1	ribonucleoprotein_complex_subunit_organization	1.5865e-06	1.97394e-05	14143	74	418	12	5.48675	Ddx39b;Eif3d;Rpl24;Rps14;Rps15;Rps17;Rps2;Rps25;Rps6;Rpsa;mt-Rnr1;mt-Rnr2
Module6_pips1	ncRNA_metabolic_process	2.47735e-06	3.03421e-05	14143	239	418	22	3.11451	Ebna1bp2;Fbl;Gars;Kars;Lars2;Rpl11;Rpl14;Rpl26;Rpl35a;Rpl7;Rps15;Rps16;Rps17;Rps19;Rps21;Rps24;Rps28;Rps6;Rps7;Rps8;Rpsa;Sars
Module6_pips1	purine_nucleoside_diphosphate_biosynthetic_process	2.51568e-06	3.03421e-05	14143	9	418	5	18.7972	Atp5a1;Atp5b;Atp5c1;Atp5d;Atp5e
Module6_pips1	purine_ribonucleoside_diphosphate_biosynthetic_process	2.51568e-06	3.03421e-05	14143	9	418	5	18.7972	Atp5a1;Atp5b;Atp5c1;Atp5d;Atp5e
Module6_pips1	negative_regulation_of_protein_complex_assembly	3.41424e-06	4.03563e-05	14143	54	418	10	6.26573	Capzb;Cdc42;Eif4ebp1;Fkbp4;Pfn1;Stmn1;Stmn2;Tmsb10;Tmsb4x;Tpm1
Module6_pips1	reactive_oxygen_species_metabolic_process	3.41424e-06	4.03563e-05	14143	54	418	10	6.26573	Atpif1;Ctgf;Cyr61;Gpx1;Gpx4;Park7;Prdx1;Prdx2;Sod1;mt-Nd2
Module6_pips1	anti-apoptosis	3.80269e-06	4.45027e-05	14143	140	418	16	3.86685	Bax;Cdk1;Cth;Fn1;Gpx1;Gstp1;Hsp90b1;Hspa5;Hspd1;Mt1;Myc;Prdx2;Ptma;Sod1;Spp1;Tpt1
Module6_pips1	macromolecular_complex_subunit_organization	4.65412e-06	5.39331e-05	14143	655	418	41	2.11791	Bax;Calr;Cct2;Cdk1;Cth;Ctnnb1;Dctpp1;Ddx39b;Eif3d;Fkbp1a;Fkbp4;H2afz;Hsp90aa1;Mif;Nap1l1;Nme2;Npm1;Pomp;Rpl24;Rps14;Rps15;Rps17;Rps2;Rps25;Rps6;Rpsa;Rrm2;Set;Stmn1;Trim28;Tuba1a;Tuba1b;Tuba1c;Tubb4b;Tubb5;Ube2s;Uqcrb;Uqcrh;Vcp;mt-Rnr1;mt-Rnr2
Module6_pips1	ADP_metabolic_process	4.90919e-06	5.57949e-05	14143	10	418	5	16.9175	Atp5a1;Atp5b;Atp5c1;Atp5d;Atp5e
Module6_pips1	ribonucleoside_diphosphate_biosynthetic_process	4.90919e-06	5.57949e-05	14143	10	418	5	16.9175	Atp5a1;Atp5b;Atp5c1;Atp5d;Atp5e
Module6_pips1	cellular_component_organization_or_biogenesis_at_cellular_level	5.26378e-06	5.92552e-05	14143	2243	418	101	1.52355	Actb;Actg1;Actn4;Anxa2;Bax;Calr;Cap1;Capzb;Cct2;Cdc42;Cdk1;Cfl1;Cnn2;Cnn3;Cst3;Ctgf;Ctnnb1;Cyr61;Ddx39b;Dek;Dynlt1b;Ebna1bp2;Eif3d;Fbl;Fkbp1a;Fkbp4;Flna;Fn1;Fscn1;Gpx1;Gpx4;H2afz;Hmga1;Hmgb1;Hmgb2;Hmgn1;Hsp90aa1;Hsp90b1;Itgb1;Lgals3;Morf4l1;Myc;Nap1l1;Nop56;Npm1;Nudc;Park7;Pfn1;Phgdh;Pomp;Prmt1;Ran;Ranbp1;Rbbp4;Rbbp7;Rcc2;Rpl11;Rpl14;Rpl24;Rpl26;Rpl35a;Rpl7;Rplp0;Rps14;Rps15;Rps16;Rps17;Rps18;Rps…
Module6_pips1	organelle_assembly	6.25704e-06	6.97719e-05	14143	84	418	12	4.83356	Flna;Rpl24;Rps14;Rps15;Rps17;Rps2;Rps25;Rps6;Rpsa;Tubb5;mt-Rnr1;mt-Rnr2
Module6_pips1	nuclear_export	6.69924e-06	7.40046e-05	14143	58	418	10	5.83361	Calr;Ddx39b;Eif5a;Hnrnpa1;Hspa9;Npm1;Ran;Rps15;Rps28;Rpsa
Module6_pips1	cellular_component_organization_or_biogenesis	6.7967e-06	7.40058e-05	14143	2691	418	116	1.45851	Actb;Actg1;Actn4;Anxa2;Arpc2;Bax;Calr;Cap1;Capzb;Cct2;Cdc42;Cdk1;Cfl1;Cnn2;Cnn3;Cst3;Ctgf;Cth;Ctnnb1;Cyr61;Dctpp1;Ddx39b;Dek;Dstn;Dynlt1b;Ebna1bp2;Eif3d;Fbl;Fkbp1a;Fkbp4;Flna;Fn1;Fscn1;Gpx1;Gpx4;H2afz;Hmga1;Hmgb1;Hmgb2;Hmgn1;Hnrnpab;Hsp90aa1;Hsp90ab1;Hsp90b1;Id1;Itgb1;Lgals3;Mif;Morf4l1;Myc;Myl12a;Nap1l1;Nme2;Nop56;Npm1;Nudc;Park7;Pfn1;Phgdh;Pomp;Prmt1;Ran;Ranbp1;Rbbp4;Rbbp7;Rcc2;Rpl11;Rpl14;Rpl2…
Module6_pips1	nucleic_acid_metabolic_process	6.82457e-06	7.40058e-05	14143	2400	418	106	1.49438	Anp32a;Atf4;Banf1;Bax;Btf3;Bzw1;Cdk1;Cnbp;Csda;Ctnnb1;Ddb1;Ddx39b;Ddx5;Dynll1;Ebna1bp2;Edf1;Eif3e;Eif4g1;Eif4g2;Ewsr1;Fbl;Gars;Gnas;H2afz;Hdgf;Hmga1;Hmgb1;Hmgb2;Hmgn1;Hnrnpa1;Hnrnpa2b1;Hnrnpa3;Hnrnpab;Hnrnpd;Hnrnpf;Hnrnph1;Hnrnpk;Hnrnpl;Hnrnpm;Hnrnpu;Hspa8;Hspd1;Id1;Junb;Kars;Klf4;Lars2;Lsm7;Morf4l1;Myc;Naca;Nap1l1;Nono;Npm1;Pabpc1;Pcbp1;Pcna;Phb2;Polr2f;Pou5f1;Rbbp4;Rbbp7;Rbm3;Rpl11;Rpl14;Rpl26;…
Module6_pips1	regulation_of_cell_death	7.18261e-06	7.71804e-05	14143	959	418	53	1.86992	Actn4;Asns;Atpif1;Bax;Cacybp;Cdc42;Cdk1;Csda;Cst3;Ctgf;Cth;Ctnnb1;Cyr61;Ddx5;Eif5a;Fn1;Fth1;Gnb2l1;Gpi1;Gpx1;Gstp1;Hmgb1;Hsp90ab1;Hsp90b1;Hspa5;Hspb1;Hspd1;Itgb1;Itm2b;Ldha;Mif;Mt1;Myc;Ngfrap1;Nme2;Park7;Pdia3;Prdx1;Prdx2;Ptma;Rps27l;Rps3;Rps3a;Rps6;Serpine1;Set;Slc25a4;Sod1;Spp1;Thbs1;Timp1;Tpt1;Ybx1
Module6_pips1	positive_regulation_of_binding	7.86335e-06	8.37341e-05	14143	72	418	11	5.16923	Anxa2;Calm1;Edf1;Eno1;Fkbp1a;Hmgb1;Hmgb2;Hsp90ab1;Ran;S100a10;Txn1
Module6_pips1	cellular_component_assembly	8.60643e-06	9.08286e-05	14143	940	418	52	1.87172	Actg1;Actn4;Bax;Calr;Capzb;Cct2;Cdc42;Cdk1;Cth;Ctnnb1;Dctpp1;Ddx39b;Eif3d;Fkbp1a;Fkbp4;Flna;Fn1;Fscn1;H2afz;Hmga1;Hsp90aa1;Hsp90b1;Itgb1;Mif;Nap1l1;Nme2;Npm1;Pomp;Rbbp4;Rpl24;Rps14;Rps15;Rps17;Rps2;Rps25;Rps6;Rpsa;Rrm2;Set;Tpm1;Trim28;Tuba1a;Tuba1b;Tuba1c;Tubb4b;Tubb5;Ube2s;Uqcrb;Uqcrh;Vcp;mt-Rnr1;mt-Rnr2
Module6_pips1	nucleoside_diphosphate_biosynthetic_process	8.78182e-06	9.18594e-05	14143	11	418	5	15.3795	Atp5a1;Atp5b;Atp5c1;Atp5d;Atp5e
Module6_pips1	negative_regulation_of_apoptotic_process	9.72559e-06	0.000100839	14143	491	418	33	2.27404	Asns;Bax;Cdk1;Csda;Cth;Ctnnb1;Cyr61;Eif5a;Fn1;Gpi1;Gpx1;Gstp1;Hsp90ab1;Hsp90b1;Hspa5;Hspb1;Hspd1;Mif;Mt1;Myc;Nme2;Park7;Prdx2;Ptma;Rps6;Serpine1;Set;Sod1;Spp1;Thbs1;Timp1;Tpt1;Ybx1
Module6_pips1	negative_regulation_of_protein_polymerization	9.9009e-06	0.000101764	14143	37	418	8	7.31566	Capzb;Fkbp4;Pfn1;Stmn1;Stmn2;Tmsb10;Tmsb4x;Tpm1
Module6_pips1	negative_regulation_of_biological_process	1.1257e-05	0.000114705	14143	2340	418	103	1.48932	Actn4;Anxa2;Asns;Atf4;Atp1a1;Atp5a1;Atp5b;Atpif1;Bax;Cacybp;Calr;Capzb;Cd63;Cdc42;Cdk1;Cnn2;Csda;Cst3;Cth;Ctnnb1;Cyr61;Ddx5;Dynll1;Eif4ebp1;Eif5a;Eno1;Fkbp1a;Fkbp4;Flna;Fn1;Fth1;Glrx3;Gnai2;Gnas;Gnb2l1;Gpi1;Gpx1;Gstp1;Hmga1;Hmgb1;Hmgb2;Hnrnpa2b1;Hnrnpab;Hsp90ab1;Hsp90b1;Hspa5;Hspa8;Hspb1;Hspd1;Id1;Ifitm3;Itgb1;Itm2b;Klf4;Lgals1;Mif;Mt1;Myc;Nedd4;Nme2;Npm1;Pabpc1;Park7;Pcna;Pebp1;Pfn1;Phb2;Pou5f1;…
Module6_pips1	negative_regulation_of_programmed_cell_death	1.15033e-05	0.000116213	14143	495	418	33	2.25566	Asns;Bax;Cdk1;Csda;Cth;Ctnnb1;Cyr61;Eif5a;Fn1;Gpi1;Gpx1;Gstp1;Hsp90ab1;Hsp90b1;Hspa5;Hspb1;Hspd1;Mif;Mt1;Myc;Nme2;Park7;Prdx2;Ptma;Rps6;Serpine1;Set;Sod1;Spp1;Thbs1;Timp1;Tpt1;Ybx1
Module6_pips1	hydrogen_peroxide_metabolic_process	1.25803e-05	0.000126016	14143	19	418	6	10.6847	Gpx1;Gpx4;Park7;Prdx1;Prdx2;Sod1
Module6_pips1	regulation_of_endopeptidase_activity	1.27761e-05	0.000126902	14143	189	418	18	3.22237	Bax;Cst3;Ctgf;Cyr61;Gpi1;Gpx1;Hmgb1;Hspa5;Hspd1;Klf4;Myc;Ptma;Rps27l;Rps3;Serpine1;Serpinh1;Thbs1;Vcp
Module6_pips1	ncRNA_processing	1.37365e-05	0.000135305	14143	190	418	18	3.20541	Ebna1bp2;Fbl;Rpl11;Rpl14;Rpl26;Rpl35a;Rpl7;Rps15;Rps16;Rps17;Rps19;Rps21;Rps24;Rps28;Rps6;Rps7;Rps8;Rpsa
Module6_pips1	regulation_of_cysteine-type_endopeptidase_activity_involved_in_apoptotic_process	1.4077e-05	0.000137513	14143	138	418	15	3.67771	Bax;Ctgf;Cyr61;Gpi1;Gpx1;Hmgb1;Hspa5;Hspd1;Klf4;Myc;Ptma;Rps27l;Rps3;Thbs1;Vcp
Module6_pips1	regulation_of_peptidase_activity	1.65226e-05	0.000159757	14143	230	418	20	2.94217	Bax;Cst3;Ctgf;Cyr61;Fn1;Gpi1;Gpx1;Hmgb1;Hspa5;Hspd1;Klf4;Myc;Pebp1;Ptma;Rps27l;Rps3;Serpine1;Serpinh1;Thbs1;Vcp
Module6_pips1	regulation_of_binding	1.66244e-05	0.000159757	14143	157	418	16	3.44815	Anxa2;Bax;Calm1;Cdc42;Edf1;Eno1;Fkbp1a;Hmgb1;Hmgb2;Hsp90ab1;Id1;Myc;Park7;Ran;S100a10;Txn1
Module6_pips1	regulation_of_cysteine-type_endopeptidase_activity	1.82452e-05	0.000173918	14143	141	418	15	3.59946	Bax;Ctgf;Cyr61;Gpi1;Gpx1;Hmgb1;Hspa5;Hspd1;Klf4;Myc;Ptma;Rps27l;Rps3;Thbs1;Vcp
Module6_pips1	nucleoside_diphosphate_metabolic_process	2.11609e-05	0.000200097	14143	30	418	7	7.89482	Atp5a1;Atp5b;Atp5c1;Atp5d;Atp5e;Nme2;Rrm2
Module6_pips1	regulation_of_RNA_splicing	2.20754e-05	0.000207089	14143	53	418	9	5.74555	Ddx5;Hnrnpa2b1;Hnrnpf;Hnrnph1;Npm1;Ptbp1;Rps26;Snrnp70;U2af2
Module6_pips1	purine_nucleoside_diphosphate_metabolic_process	2.32921e-05	0.000215088	14143	13	418	5	13.0134	Atp5a1;Atp5b;Atp5c1;Atp5d;Atp5e
Module6_pips1	purine_ribonucleoside_diphosphate_metabolic_process	2.32921e-05	0.000215088	14143	13	418	5	13.0134	Atp5a1;Atp5b;Atp5c1;Atp5d;Atp5e
Module6_pips1	maturation_of_SSU-rRNA_from_tricistronic_rRNA_transcript_(SSU-rRNA,_5.8S_rRNA,_LSU-rRNA)	2.45294e-05	0.000224758	14143	7	418	4	19.3342	Rps21;Rps24;Rps8;Rpsa
Module6_pips1	negative_regulation_of_cellular_process	2.61976e-05	0.000238197	14143	2155	418	95	1.49156	Actn4;Asns;Atp1a1;Atp5a1;Atp5b;Atpif1;Bax;Cacybp;Calr;Capzb;Cd63;Cdk1;Cnn2;Csda;Cst3;Cth;Ctnnb1;Cyr61;Ddx5;Dynll1;Eif4ebp1;Eif5a;Eno1;Fkbp1a;Fkbp4;Fn1;Fth1;Gnai2;Gnb2l1;Gpi1;Gpx1;Gstp1;Hmga1;Hmgb1;Hmgb2;Hnrnpa2b1;Hnrnpab;Hsp90ab1;Hsp90b1;Hspa5;Hspa8;Hspb1;Hspd1;Id1;Ifitm3;Itgb1;Itm2b;Klf4;Lgals1;Mif;Mt1;Myc;Nedd4;Nme2;Npm1;Pabpc1;Park7;Pcna;Pebp1;Pfn1;Phb2;Pou5f1;Prdx2;Prmt1;Ptbp1;Ptma;Rab7;Rbbp7…
Module6_pips1	monovalent_inorganic_cation_transport	3.28258e-05	0.000296184	14143	184	418	17	3.12605	Atp1a1;Atp5a1;Atp5b;Atp5c1;Atp5d;Atp5e;Atp5f1;Atp5g3;Atp5h;Atp5l;Atp5o;Cox6c;Cox7c;Uqcr11;mt-Atp6;mt-Atp8;mt-Co1
Module6_pips1	purine_ribonucleoside_metabolic_process	4.03602e-05	0.000361408	14143	187	418	17	3.0759	Aprt;Cdc42;Eef2;Gars;Gnai2;Gnas;Gnb1;Gnb2;Kars;Nme2;Rab7;Ran;Tuba1a;Tuba1b;Tuba1c;Tubb4b;Tubb5
Module6_pips1	nucleocytoplasmic_transport	4.43878e-05	0.00039154	14143	152	418	15	3.33897	Anp32a;Calr;Cfl1;Ddx39b;Eif5a;Hnrnpa1;Hspa9;Ipo5;Kpna2;Npm1;Ran;Rps15;Rps28;Rpsa;Sec61b
Module6_pips1	regulation_of_translation	4.43878e-05	0.00039154	14143	152	418	15	3.33897	Calr;Eif3k;Eif4ebp1;Eif4g1;Eif4g2;Eif5a;Gnb2l1;Pcbp1;Ppp1ca;Rbm3;Rps14;Rps27l;Rps4x;Rps5;Thbs1
Module6_pips1	regulation_of_programmed_cell_death	4.63578e-05	0.000405888	14143	923	418	49	1.79622	Actn4;Asns;Atpif1;Bax;Cdc42;Cdk1;Csda;Cst3;Cth;Ctnnb1;Cyr61;Ddx5;Eif5a;Fn1;Gnb2l1;Gpi1;Gpx1;Gstp1;Hmgb1;Hsp90ab1;Hsp90b1;Hspa5;Hspb1;Hspd1;Itgb1;Itm2b;Ldha;Mif;Mt1;Myc;Ngfrap1;Nme2;Park7;Pdia3;Prdx1;Prdx2;Ptma;Rps27l;Rps3;Rps3a;Rps6;Serpine1;Set;Sod1;Spp1;Thbs1;Timp1;Tpt1;Ybx1
Module6_pips1	transport	4.73183e-05	0.000411252	14143	2101	418	92	1.48159	Actn4;Anp32a;Anxa2;Ap2m1;Ap2s1;Aprt;Arf1;Atp1a1;Atp2a3;Atp5a1;Atp5b;Atp5c1;Atp5d;Atp5e;Atp5f1;Atp5g3;Atp5h;Atp5l;Atp5o;Bax;Calr;Cap1;Cdc42;Cfl1;Clic1;Cox6c;Cox7c;Ctgf;Ctnnb1;Ddx39b;Dynll1;Dynlrb1;Dynlt1b;Eif5a;Etfb;Fkbp1a;Fkbp4;Flna;Fth1;Gdi2;Hnrnpa1;Hnrnpa2b1;Hnrnpa3;Hsp90aa1;Hspa9;Ipo5;Itgb1;Kpna2;Marcksl1;Myl12a;Naca;Ndufa4;Ndufa7;Nedd4;Npm1;Park7;Rab7;Ran;Ranbp1;Rpl11;Rps15;Rps19;Rps28;Rpsa;S…
Module6_pips1	maturation_of_SSU-rRNA	4.79129e-05	0.00041338	14143	8	418	4	16.9175	Rps21;Rps24;Rps8;Rpsa
Module6_pips1	nuclear_transport	5.16732e-05	0.000442592	14143	154	418	15	3.29561	Anp32a;Calr;Cfl1;Ddx39b;Eif5a;Hnrnpa1;Hspa9;Ipo5;Kpna2;Npm1;Ran;Rps15;Rps28;Rpsa;Sec61b
Module6_pips1	purine_nucleoside_metabolic_process	5.27712e-05	0.000448745	14143	191	418	17	3.01149	Aprt;Cdc42;Eef2;Gars;Gnai2;Gnas;Gnb1;Gnb2;Kars;Nme2;Rab7;Ran;Tuba1a;Tuba1b;Tuba1c;Tubb4b;Tubb5
Module6_pips1	establishment_of_localization	6.7763e-05	0.000572113	14143	2150	418	93	1.46356	Actn4;Anp32a;Anxa2;Ap2m1;Ap2s1;Aprt;Arf1;Atp1a1;Atp2a3;Atp5a1;Atp5b;Atp5c1;Atp5d;Atp5e;Atp5f1;Atp5g3;Atp5h;Atp5l;Atp5o;Bax;Calr;Cap1;Cdc42;Cfl1;Clic1;Cox6c;Cox7c;Ctgf;Ctnnb1;Ddx39b;Dynll1;Dynlrb1;Dynlt1b;Eif5a;Etfb;Fkbp1a;Fkbp4;Flna;Fth1;Gdi2;Hnrnpa1;Hnrnpa2b1;Hnrnpa3;Hsp90aa1;Hspa9;Ipo5;Itgb1;Kpna2;Marcksl1;Myl12a;Naca;Ndufa4;Ndufa7;Nedd4;Npm1;Nudc;Park7;Rab7;Ran;Ranbp1;Rpl11;Rps15;Rps19;Rps28;R…
Module6_pips1	actin_filament-based_process	7.20029e-05	0.000599348	14143	255	418	20	2.65372	Actg1;Actn4;Calr;Cap1;Capzb;Cdc42;Cfl1;Cnn2;Cnn3;Flna;Fscn1;Hmgb1;Hsp90b1;Itgb1;Myl6;Pfn1;Ran;Tmsb10;Tmsb4x;Tpm1
Module6_pips1	ion_transmembrane_transport	7.20029e-05	0.000599348	14143	255	418	20	2.65372	Atp1a1;Atp5a1;Atp5b;Atp5c1;Atp5d;Atp5e;Atp5f1;Atp5g3;Atp5h;Atp5l;Atp5o;Bax;Clic1;Cox6c;Cox7c;S100a6;Uqcr11;mt-Atp6;mt-Atp8;mt-Co1
Module6_pips1	regulation_of_apoptotic_process	7.26917e-05	0.000600851	14143	914	418	48	1.77689	Actn4;Asns;Atpif1;Bax;Cdc42;Cdk1;Csda;Cth;Ctnnb1;Cyr61;Ddx5;Eif5a;Fn1;Gnb2l1;Gpi1;Gpx1;Gstp1;Hmgb1;Hsp90ab1;Hsp90b1;Hspa5;Hspb1;Hspd1;Itgb1;Itm2b;Ldha;Mif;Mt1;Myc;Ngfrap1;Nme2;Park7;Pdia3;Prdx1;Prdx2;Ptma;Rps27l;Rps3;Rps3a;Rps6;Serpine1;Set;Sod1;Spp1;Thbs1;Timp1;Tpt1;Ybx1
Module6_pips1	negative_regulation_of_RNA_splicing	7.34512e-05	0.000602912	14143	16	418	5	10.5734	Hnrnpa2b1;Npm1;Ptbp1;Rps26;U2af2
Module6_pips1	cellular_macromolecule_catabolic_process	8.02054e-05	0.000653812	14143	363	418	25	2.33023	Bax;Ddb1;Eif3e;Hsp90b1;Hspa5;Lsm7;Myc;Nedd4;Pabpc1;Psma4;Psma6;Psma7;Psmb1;Psmb3;Psmb4;Psmb5;Psmb6;Psmb7;Rab7;Sec61b;Sod1;Ube2d3;Ube2i;Ube2s;Vcp
Module6_pips1	regulation_of_protein_complex_assembly	8.60988e-05	0.000697047	14143	161	418	15	3.15232	Arpc2;Bax;Capzb;Cdc42;Eif4ebp1;Fkbp4;Gnb2l1;Hmgb1;Pfn1;Stmn1;Stmn2;Tmsb10;Tmsb4x;Tpm1;Vcp
Module6_pips1	actin_cytoskeleton_organization	9.08628e-05	0.000730611	14143	239	418	19	2.68981	Actg1;Actn4;Calr;Cap1;Capzb;Cdc42;Cfl1;Cnn2;Cnn3;Flna;Fscn1;Hmgb1;Hsp90b1;Itgb1;Pfn1;Ran;Tmsb10;Tmsb4x;Tpm1
Module6_pips1	ribonucleoside_metabolic_process	9.3702e-05	0.00074835	14143	200	418	17	2.87597	Aprt;Cdc42;Eef2;Gars;Gnai2;Gnas;Gnb1;Gnb2;Kars;Nme2;Rab7;Ran;Tuba1a;Tuba1b;Tuba1c;Tubb4b;Tubb5
Module6_pips1	GTP_metabolic_process	0.000100505	0.000797294	14143	145	418	14	3.26682	Cdc42;Eef2;Gnai2;Gnas;Gnb1;Gnb2;Nme2;Rab7;Ran;Tuba1a;Tuba1b;Tuba1c;Tubb4b;Tubb5
Module6_pips1	cellular_protein_catabolic_process	0.000104564	0.000823965	14143	262	418	20	2.58282	Bax;Ddb1;Hsp90b1;Hspa5;Nedd4;Psma4;Psma6;Psma7;Psmb1;Psmb3;Psmb4;Psmb5;Psmb6;Psmb7;Rab7;Sec61b;Ube2d3;Ube2i;Ube2s;Vcp
Module6_pips1	intracellular_transport	0.000113604	0.000889269	14143	604	418	35	1.96063	Anp32a;Ap2m1;Ap2s1;Atp5o;Bax;Calr;Cdc42;Cfl1;Ddx39b;Dynlt1b;Eif5a;Flna;Hnrnpa1;Hsp90aa1;Hspa9;Ipo5;Itgb1;Kpna2;Myl12a;Nedd4;Npm1;Rab7;Ran;Ranbp1;Rpl11;Rps15;Rps28;Rpsa;Sec61b;Sod1;Timm23;Vcp;Ywhae;Ywhaq;Ywhaz
Module0_mef48	ion_transmembrane_transport	6.90462e-08	7.64203e-05	14143	255	1533	57	2.06222	Abcc8;Atp1a2;Atp2b2;Atp6v0a4;Atp6v1b1;Atp6v1c2;Atp7b;Cacng6;Chrna9;Chrnb2;Clcn1;Clcnka;Cnga3;Cngb1;Fxyd4;Gck;Hcn3;Htr2b;Kcna7;Kcnc3;Kcne2;Kcng3;Kcnh1;Kcnh3;Kcnip2;Kcnj14;Kcnk10;Kcnmb2;Kcnq2;Kcnu1;P2rx1;P2rx2;Rhbg;Rhcg;Ryr1;Ryr2;Ryr3;Scn3a;Scn4b;Scn5a;Scn8a;Slc12a3;Slc13a5;Slc17a7;Slc1a1;Slc22a7;Slc23a1;Slc2a4;Slc30a2;Slc34a3;Slc39a4;Slc5a5;Slc6a15;Slc8a2;Slco4c1;Trpc4;Trpm2
Module0_mef48	male_gamete_generation	1.39091e-07	7.64203e-05	14143	216	1533	50	2.13558	1700019N12Rik;Acsbg2;Bmp8a;Bmp8b;Boll;Ccna1;Ccnb1ip1;Clgn;D1Pas1;Dazl;Ddx25;Dhh;Dmc1;Dmrt1;Fkbp6;Foxa3;Gata4;Ggt1;Gli1;Hist1h1a;Hormad1;Klhl10;Mael;Morc1;Mtl5;Nanos3;Nr0b1;Ovol1;Piwil2;Piwil4;Pld6;Prok2;Rnf17;Slco4c1;Sohlh2;Sox3;Spag6;Stra8;Syce3;Sycp3;Taf7l;Tcp11;Tdrd1;Tdrd5;Tex19.1;Tmem146;Ybx2;Zfp42;Zglp1;Zpbp
Module0_mef48	spermatogenesis	1.39091e-07	7.64203e-05	14143	216	1533	50	2.13558	1700019N12Rik;Acsbg2;Bmp8a;Bmp8b;Boll;Ccna1;Ccnb1ip1;Clgn;D1Pas1;Dazl;Ddx25;Dhh;Dmc1;Dmrt1;Fkbp6;Foxa3;Gata4;Ggt1;Gli1;Hist1h1a;Hormad1;Klhl10;Mael;Morc1;Mtl5;Nanos3;Nr0b1;Ovol1;Piwil2;Piwil4;Pld6;Prok2;Rnf17;Slco4c1;Sohlh2;Sox3;Spag6;Stra8;Syce3;Sycp3;Taf7l;Tcp11;Tdrd1;Tdrd5;Tex19.1;Tmem146;Ybx2;Zfp42;Zglp1;Zpbp
Module0_mef48	sexual_reproduction	1.56921e-07	7.64203e-05	14143	326	1533	67	1.89608	1700019N12Rik;Acsbg2;Amh;Atp8b3;Bmp8a;Bmp8b;Boll;Ccna1;Ccnb1ip1;Clgn;D1Pas1;Dazl;Ddx25;Dhh;Dmc1;Dmrt1;Fkbp6;Fmn2;Foxa3;Gata4;Ggt1;Gli1;Hist1h1a;Hormad1;Izumo1;Klhl10;Lin28a;Mael;Morc1;Mtl5;Nanos3;Nos2;Nos3;Nr0b1;Ooep;Ovol1;Piwil2;Piwil4;Pld6;Prdm14;Prok2;Rnf17;Slco4c1;Sohlh2;Sox3;Spag6;Spnb4;Stra8;Syce3;Sycp2;Sycp3;T;Taf7l;Tcp11;Tdrd1;Tdrd5;Tex11;Tex19.1;Tmem146;Trim36;Vgf;Wbp2nl;Ybx2;Zfp42;Zglp1…
Module1_mef48	G-protein_coupled_receptor_signaling_pathway	8.43805e-09	2.34831e-05	14143	304	2609	97	1.72968	A630033H20Rik;Adcy4;Adcy5;Adcyap1r1;Adora2b;Adra1b;Adra2a;Adrb1;Adrb2;Adrb3;Areg;Bai2;Cacna1d;Calca;Ccrl1;Ccrl2;Cdk5r1;Celsr2;Cxcr2;Cxcr4;Darc;Dgke;Dgkh;Edn1;Entpd1;Entpd2;Fzd3;Fzd9;Gabrb3;Galr2;Ghrl;Gna14;Gna15;Gnal;Gnat2;Gnaz;Gpr1;Gpr133;Gpr135;Gpr146;Gpr149;Gpr157;Gpr173;Gpr183;Gpr19;Gpr30;Gpr34;Gpr45;Gpr56;Gpr63;Gpr65;Gpr68;Gpr84;Gpr85;Gpr98;Grpr;Homer2;Hrh1;Htr2a;Htr7;Kiss1r;Lgr6;Lpar2;Lpar5…
Module1_mef48	potassium_ion_transport	7.07088e-08	6.95467e-05	14143	78	2609	35	2.43243	Abcc9;Atp1a3;Atp1b2;Fxyd2;Hcn1;Hcn2;Hpn;Kcna6;Kcnb1;Kcnd1;Kcnf1;Kcnh2;Kcnh6;Kcnip3;Kcnip4;Kcnj2;Kcnj4;Kcnj8;Kcnk1;Kcnk13;Kcnk6;Kcnk7;Kcnma1;Kcnmb4;Kcnn1;Kcnn4;Kcnq5;Kcns1;Kcns3;Kcnt2;P2ry12;Slc12a5;Slc12a8;Slc24a5;Slc9a7
Module1_mef48	neurological_system_process	7.49695e-08	6.95467e-05	14143	545	2609	150	1.49198	Ace;Adam22;Adcy5;Adra1b;Adra2a;Adrb1;Adrb2;Aff2;Aldh5a1;Alms1;Alox5;Apba1;Apba2;Arhgef15;Atp1a3;Bbs1;Bbs10;Bche;C1ql3;Cacna1b;Cacna1d;Cacnb2;Calca;Camk2b;Camk4;Casp1;Cdh1;Cdh23;Cdhr1;Chd7;Chrna7;Chst10;Cldn11;Cldn19;Cntn2;Cntnap1;Col11a2;Ctnna2;Ctnnd2;Cxcr4;Ddc;Dlg2;Doc2b;Edn1;Ephx2;Espn;Fabp7;Fgfr3;Fzd9;Gabrb2;Gabrb3;Gal3st1;Gch1;Ghrl;Gjb4;Gjc3;Gm98;Gnal;Gnat2;Gpr98;Gria1;Grin1;Grin2d;Grin3a;Grp…
Module1_mef48	system_process	1.45659e-07	9.02223e-05	14143	736	2609	191	1.40677	Ace;Actn3;Adam22;Adcy5;Adora2b;Adra1b;Adra2a;Adrb1;Adrb2;Adrb3;Aff2;Aldh5a1;Alms1;Alox5;Apba1;Apba2;Aqp5;Arhgef15;Atp1a3;Bbs1;Bbs10;Bche;Bcl2;Btc;C1ql3;Cacna1b;Cacna1d;Cacnb2;Calca;Camk2b;Camk4;Casp1;Cbs;Cdh1;Cdh23;Cdhr1;Cftr;Chd7;Chrna7;Chst10;Cldn11;Cldn19;Cntn2;Cntnap1;Col11a2;Ctnna2;Ctnnd2;Cxcr4;Ddc;Dlg2;Doc2b;Edn1;Enpep;Ephx2;Espn;F5;Fabp7;Fgfbp3;Fgfr3;Fli1;Fzd9;Gabrb2;Gabrb3;Gal3st1;Gata3;G…
Module1_mef48	multicellular_organismal_signaling	1.85871e-07	9.02223e-05	14143	280	2609	87	1.68434	Adam22;Adrb1;Adrb2;Aldh5a1;Apba1;Apba2;Arhgef15;Bche;C1ql3;Cacna1b;Cacna1d;Cacnb2;Camk2b;Camk4;Chrna7;Cldn11;Cldn19;Cntn2;Cntnap1;Ctnna2;Cxcr4;Ddc;Dlg2;Doc2b;Fgfr3;Gabrb2;Gabrb3;Gal3st1;Ghrl;Gjc3;Gm98;Gria1;Grin1;Grin2d;Grpr;Hes5;Hrh1;Htr7;Kcnh2;Kcnma1;Kcnmb4;Klk8;Lgi4;Lin7b;Mbp;Mir23b;Naalad2;Napb;Nlgn3;Npff;Npy;Npy1r;Nrcam;Ntf3;Oxtr;P2rx3;P2rx5;P2rx7;Park2;Plp1;Ppfia3;Prima1;Prkcz;Rapsn;Reln;Ri…
Module1_mef48	transmission_of_nerve_impulse	1.94515e-07	9.02223e-05	14143	272	2609	85	1.69402	Adam22;Adrb1;Adrb2;Aldh5a1;Apba1;Apba2;Arhgef15;Bche;C1ql3;Cacna1b;Cacnb2;Camk2b;Camk4;Chrna7;Cldn11;Cldn19;Cntn2;Cntnap1;Ctnna2;Cxcr4;Ddc;Dlg2;Doc2b;Fgfr3;Gabrb2;Gabrb3;Gal3st1;Ghrl;Gjc3;Gm98;Gria1;Grin1;Grin2d;Grpr;Hes5;Hrh1;Htr7;Kcnma1;Kcnmb4;Klk8;Lgi4;Lin7b;Mbp;Mir23b;Naalad2;Napb;Nlgn3;Npff;Npy;Npy1r;Nrcam;Ntf3;Oxtr;P2rx3;P2rx5;P2rx7;Park2;Plp1;Ppfia3;Prima1;Prkcz;Rapsn;Reln;Ric3;Rims1;Rims2…
Module1_mef48	cellular_potassium_ion_transport	7.24388e-07	0.000239158	14143	45	2609	23	2.77066	Abcc9;Hcn1;Hcn2;Hpn;Kcna6;Kcnb1;Kcnd1;Kcnf1;Kcnh2;Kcnip3;Kcnip4;Kcnj8;Kcnk1;Kcnk13;Kcnk6;Kcnk7;Kcnma1;Kcnn4;Kcnq5;Kcns1;Kcns3;Kcnt2;P2ry12
Module1_mef48	potassium_ion_transmembrane_transport	7.24388e-07	0.000239158	14143	45	2609	23	2.77066	Abcc9;Hcn1;Hcn2;Hpn;Kcna6;Kcnb1;Kcnd1;Kcnf1;Kcnh2;Kcnip3;Kcnip4;Kcnj8;Kcnk1;Kcnk13;Kcnk6;Kcnk7;Kcnma1;Kcnn4;Kcnq5;Kcns1;Kcns3;Kcnt2;P2ry12
Module1_mef48	synaptic_transmission	7.73418e-07	0.000239158	14143	202	2609	66	1.77117	Adrb1;Adrb2;Aldh5a1;Apba1;Apba2;Arhgef15;Bche;C1ql3;Cacna1b;Cacnb2;Camk2b;Camk4;Chrna7;Ctnna2;Ddc;Dlg2;Doc2b;Gabrb2;Gabrb3;Ghrl;Gria1;Grin1;Grin2d;Grpr;Hrh1;Htr7;Kcnma1;Klk8;Lin7b;Naalad2;Napb;Nlgn3;Npff;Npy;Npy1r;Ntf3;Oxtr;P2rx3;P2rx7;Park2;Ppfia3;Prima1;Prkcz;Rapsn;Reln;Ric3;Rims1;Rims2;Shank3;Slc12a5;Slc18a2;Snap91;Sncg;Sstr2;Ston2;Stx1a;Stx1b;Sv2a;Sv2c;Syn1;Syt1;Tac1;Tmem90b;Tmod2;Unc13a;Unc1…
Module1_mef48	cell-cell_signaling	1.15723e-06	0.000322058	14143	325	2609	95	1.58456	Acvr2b;Adrb1;Adrb2;Aldh5a1;Apba1;Apba2;Arhgef15;Bche;Bmp2;Btk;C1ql3;Cacna1b;Cacna1d;Cacnb2;Camk2b;Camk4;Ccl5;Chrna7;Ctnna2;Ddc;Dlg2;Dll1;Doc2b;Edn1;Fgf10;Fgf9;Fgfbp1;Fgfr3;Foxa1;Gabrb2;Gabrb3;Gata3;Gdnf;Ghrl;Gja5;Gjc3;Gria1;Grin1;Grin2d;Grpr;Hrh1;Htr7;Ildr2;Kcnma1;Klk8;Lin7b;Naalad2;Napb;Nlgn3;Npff;Npy;Npy1r;Ntf3;Oxtr;P2rx3;P2rx7;Park2;Pdgfb;Pomc;Pou2f1;Ppfia3;Prima1;Prkcz;Rapgef4;Rapsn;Reln;Ric3…
Module2_mef48	DNA_repair	2.92514e-07	0.000859407	14143	290	2699	91	1.6443	1110054O05Rik;2310003H01Rik;2310035K24Rik;4933407H18Rik;Actr5;Alkbh1;Alkbh2;Apex2;Apitd1;Aplf;Ascc3;Asf1a;Atr;Atrip;C230052I12Rik;C330006K01Rik;Cdc14b;Cdca5;Chd1l;Chek1;Chek2;Clspn;Cry1;Cry2;Dclre1a;Dclre1c;Ddb2;Dtl;Eme2;Ercc2;Ercc4;Ercc6;Ercc8;Fam175a;Fancc;Fancg;Fanci;Fancl;Hinfp;Hspa1a;Hus1;Ino80;Kin;Mlh1;Mlh3;Mms22l;Msh3;Ndnl2;Neil1;Neil3;Nfrkb;Nhej1;Nthl1;Ogg1;Paxip1;Pms1;Pms2;Pola1;Pole;Pol…
Module3_mef48	RNA_metabolic_process	1.15443e-15	3.30976e-12	14143	2006	2651	509	1.35369	0610007P22Rik;1190005F20Rik;2210018M11Rik;2410022L05Rik;2610301G19Rik;Abt1;Actr8;Adar;Adarb1;Adnp2;Aff1;Aff3;Ahr;Apbb1;Apobec1;Aqr;Arid4b;Arntl;Ascc1;Ascc2;Asf1b;Ash1l;Asxl1;Atad2;Atf3;Atf7;Atf7ip;Atoh8;Atxn1l;Bach1;Bahd1;Bbx;Bcor;Birc2;Bop1;Brd8;Brms1;Cars2;Casc3;Cbx4;Cc2d1a;Cc2d1b;Ccdc101;Ccdc55;Ccnc;Ccrn4l;Cd3eap;Cdc40;Cdc73;Cdk13;Cdk7;Cdk8;Cdyl;Cebpa;Cebpg;Cebpz;Celf2;Chaf1a;Chaf1b;Chd1;Chd9;…
Module3_mef48	nucleic_acid_metabolic_process	1.11888e-14	1.60391e-11	14143	2400	2651	587	1.30484	0610007P08Rik;0610007P22Rik;1190005F20Rik;2210018M11Rik;2410022L05Rik;2610301G19Rik;Abt1;Actr8;Adar;Adarb1;Adnp2;Aff1;Aff3;Ahr;Akap8;Apaf1;Apbb1;Apobec1;Aptx;Aqr;Arid4b;Arntl;Ascc1;Ascc2;Asf1b;Ash1l;Asxl1;Atad2;Atf3;Atf7;Atf7ip;Atoh8;Atxn1l;Bach1;Bahd1;Bbx;Bcor;Birc2;Bop1;Brcc3;Brd8;Brms1;Cars2;Casc3;Cbx4;Cc2d1a;Cc2d1b;Ccdc101;Ccdc55;Ccnc;Ccne1;Ccrn4l;Cd3eap;Cdc40;Cdc73;Cdk13;Cdk2;Cdk7;Cdk8;Cdkn2…
Module3_mef48	gene_expression	5.13461e-12	4.90698e-09	14143	2319	2651	555	1.2768	0610007P22Rik;1190005F20Rik;2210018M11Rik;2410022L05Rik;2610301G19Rik;Abt1;Actr8;Adamts3;Adar;Adarb1;Adnp2;Aff1;Aff3;Ahr;Alg8;Apbb1;Apobec1;Aqr;Arid4b;Arntl;Ascc1;Ascc2;Asf1b;Ash1l;Asxl1;Atad2;Atf3;Atf7;Atf7ip;Atoh8;Atxn1l;B3galnt2;Bach1;Bahd1;Bbx;Bcor;Birc2;Bop1;Brd8;Brf1;Brms1;C1galt1;C2cd3;Cars2;Casc3;Casp7;Cbx4;Cc2d1a;Cc2d1b;Ccdc101;Ccdc55;Ccnc;Cd3eap;Cdc40;Cdc73;Cdk13;Cdk7;Cdk8;Cdyl;Cebpa;Ce…
Module3_mef48	cellular_macromolecule_metabolic_process	3.89681e-11	2.79304e-08	14143	4112	2651	910	1.18065	0610007P08Rik;0610007P22Rik;1190005F20Rik;2210018M11Rik;2410022L05Rik;2610301G19Rik;4930444A02Rik;A830007P12Rik;Aak1;Abca1;Abi2;Abl2;Abt1;Actr8;Acvr2a;Acvrl1;Adar;Adarb1;Adck1;Adck2;Adck5;Adnp2;Aff1;Aff3;Agl;Ahr;Akap8;Akt3;Alg8;Alg9;Apaf1;Apbb1;Apobec1;Aptx;Aqr;Arid4b;Arih2;Arl6;Arntl;Ascc1;Ascc2;Asf1b;Ash1l;Asxl1;Atad2;Ate1;Atf3;Atf7;Atf7ip;Atg7;Atoh8;Atxn1l;Aurka;Aurkb;Avpi1;B230120H23Rik;B3gal…
Module3_mef48	transcription,_DNA-dependent	5.53471e-11	3.1736e-08	14143	1477	2651	372	1.34368	2210018M11Rik;2410022L05Rik;Abt1;Actr8;Adar;Adnp2;Aff1;Aff3;Ahr;Apbb1;Arid4b;Arntl;Ascc1;Ascc2;Asf1b;Ash1l;Asxl1;Atad2;Atf3;Atf7;Atf7ip;Atoh8;Atxn1l;Bach1;Bahd1;Bbx;Bcor;Birc2;Brd8;Brms1;Cbx4;Cc2d1a;Cc2d1b;Ccdc101;Ccnc;Cd3eap;Cdc73;Cdk7;Cdk8;Cdyl;Cebpa;Cebpg;Cebpz;Chaf1a;Chaf1b;Chd1;Chd9;Clock;Crcp;Crebbp;Crebzf;Crtc2;Crtc3;Csrnp1;Cux1;Daxx;Dbp;Deaf1;Dmap1;Dmtf1;Dnajc2;Dnmt3a;Dvl2;E2f1;E2f3;E2f6;…
Module3_mef48	RNA_biosynthetic_process	6.66936e-11	3.18684e-08	14143	1479	2651	372	1.34186	2210018M11Rik;2410022L05Rik;Abt1;Actr8;Adar;Adnp2;Aff1;Aff3;Ahr;Apbb1;Arid4b;Arntl;Ascc1;Ascc2;Asf1b;Ash1l;Asxl1;Atad2;Atf3;Atf7;Atf7ip;Atoh8;Atxn1l;Bach1;Bahd1;Bbx;Bcor;Birc2;Brd8;Brms1;Cbx4;Cc2d1a;Cc2d1b;Ccdc101;Ccnc;Cd3eap;Cdc73;Cdk7;Cdk8;Cdyl;Cebpa;Cebpg;Cebpz;Chaf1a;Chaf1b;Chd1;Chd9;Clock;Crcp;Crebbp;Crebzf;Crtc2;Crtc3;Csrnp1;Cux1;Daxx;Dbp;Deaf1;Dmap1;Dmtf1;Dnajc2;Dnmt3a;Dvl2;E2f1;E2f3;E2f6;…
Module3_mef48	regulation_of_RNA_biosynthetic_process	3.18975e-10	1.30643e-07	14143	2150	2651	509	1.26302	2210018M11Rik;2410022L05Rik;2610301G19Rik;Ablim1;Abt1;Actr8;Acvrl1;Adar;Adnp2;Aff1;Aff3;Ahr;Apbb1;Apobec1;Arhgef10l;Arhgef11;Arid2;Arid4b;Arntl;Ascc1;Ascc2;Asf1b;Ash1l;Asxl1;Atad2;Atf3;Atf6;Atf7;Atf7ip;Atoh8;Atxn1l;Aurkb;Bach1;Bahd1;Bbx;Bcl9;Bcor;Birc2;Brd8;Brms1;Cbfa2t2;Cbx4;Cc2d1a;Cc2d1b;Ccdc101;Ccl3;Ccl4;Ccnc;Cdc73;Cdk13;Cdk2;Cdk5;Cdk5rap2;Cdk7;Cdk8;Cdyl;Cebpa;Cebpg;Cebpz;Cenpf;Chaf1a;Chaf1b;C…
Module3_mef48	regulation_of_transcription,_DNA-dependent	4.87316e-10	1.74642e-07	14143	2146	2651	507	1.2604	2210018M11Rik;2410022L05Rik;2610301G19Rik;Ablim1;Abt1;Actr8;Acvrl1;Adar;Adnp2;Aff1;Aff3;Ahr;Apbb1;Apobec1;Arhgef10l;Arhgef11;Arid2;Arid4b;Arntl;Ascc1;Ascc2;Asf1b;Ash1l;Asxl1;Atad2;Atf3;Atf6;Atf7;Atf7ip;Atoh8;Atxn1l;Aurkb;Bach1;Bahd1;Bbx;Bcl9;Bcor;Birc2;Brd8;Brms1;Cbfa2t2;Cbx4;Cc2d1a;Cc2d1b;Ccdc101;Ccl3;Ccnc;Cdc73;Cdk13;Cdk2;Cdk5;Cdk5rap2;Cdk7;Cdk8;Cdyl;Cebpa;Cebpg;Cebpz;Cenpf;Chaf1a;Chaf1b;Chd1;C…
Module3_mef48	biosynthetic_process	1.29446e-09	4.12357e-07	14143	2659	2651	609	1.22189	2210018M11Rik;2410022L05Rik;2810405K02Rik;Aasdhppt;Abca1;Abt1;Acaca;Acer3;Acsl3;Actr8;Ada;Adar;Adcy3;Adi1;Adnp2;Aff1;Aff3;Agk;Agpat4;Ahr;Alas1;Aldh4a1;Alg11;Alg8;Alg9;Apbb1;Apip;Apobec1;Arid4b;Arntl;Ascc1;Ascc2;Asf1b;Ash1l;Asxl1;Atad2;Atf3;Atf7;Atf7ip;Atg7;Atoh8;Atp1b1;Atxn1l;B3galnt2;B4galt6;B4galt7;Bach1;Bahd1;Bbx;Bcor;Birc2;Brd8;Brf1;Brms1;C1galt1;Cars2;Cbr4;Cbx4;Cc2d1a;Cc2d1b;Ccdc101;Ccnc;Ccn…
Module3_mef48	regulation_of_nucleobase-containing_compound_metabolic_process	1.55968e-09	4.47161e-07	14143	2514	2651	579	1.2287	2210018M11Rik;2410022L05Rik;2610301G19Rik;Abca1;Ablim1;Abt1;Actr8;Acvrl1;Adar;Adcy3;Adnp2;Aff1;Aff3;Ahr;Amot;Apbb1;Apobec1;Arhgef10;Arhgef10l;Arhgef11;Arhgef5;Arid2;Arid4b;Arntl;Asap3;Ascc1;Ascc2;Asf1b;Ash1l;Asxl1;Atad2;Atf3;Atf6;Atf7;Atf7ip;Atoh8;Atxn1l;Aurkb;Bach1;Bahd1;Bbx;Bcl9;Bcor;Birc2;Brcc3;Brd8;Brms1;Cbfa2t2;Cbx4;Cc2d1a;Cc2d1b;Ccdc101;Ccdc55;Ccl3;Ccl4;Ccnc;Cdc73;Cdk13;Cdk2;Cdk5;Cdk5rap2;C…
Module3_mef48	nucleobase-containing_compound_metabolic_process	2.58827e-09	6.2458e-07	14143	2863	2651	648	1.2075	0610007P08Rik;0610007P22Rik;1190005F20Rik;2210018M11Rik;2410022L05Rik;2610301G19Rik;AI314976;Abca3;Abcc1;Abt1;Actr8;Ada;Adar;Adarb1;Adcy3;Adnp2;Aff1;Aff3;Ahr;Akap8;Aldh6a1;Apaf1;Apbb1;Apobec1;Aptx;Aqr;Arfrp1;Arid4b;Arl4a;Arntl;Ascc1;Ascc2;Asf1b;Ash1l;Asxl1;Atad2;Atf3;Atf7;Atf7ip;Atoh8;Atp1b1;Atxn1l;B3galnt2;Bach1;Bahd1;Bbx;Bcor;Birc2;Bop1;Brcc3;Brd8;Brms1;Cars2;Casc3;Cbx4;Cc2d1a;Cc2d1b;Ccdc101;Cc…
Module3_mef48	cellular_biosynthetic_process	2.7588e-09	6.2458e-07	14143	2562	2651	587	1.22234	2210018M11Rik;2410022L05Rik;2810405K02Rik;Abca1;Abt1;Acaca;Acer3;Acsl3;Actr8;Ada;Adar;Adcy3;Adi1;Adnp2;Aff1;Aff3;Agk;Agpat4;Ahr;Alas1;Aldh4a1;Alg8;Alg9;Apbb1;Apip;Apobec1;Arid4b;Arntl;Ascc1;Ascc2;Asf1b;Ash1l;Asxl1;Atad2;Atf3;Atf7;Atf7ip;Atg7;Atoh8;Atp1b1;Atxn1l;B3galnt2;B4galt6;Bach1;Bahd1;Bbx;Bcor;Birc2;Brd8;Brf1;Brms1;C1galt1;Cars2;Cbr4;Cbx4;Cc2d1a;Cc2d1b;Ccdc101;Ccnc;Ccne1;Cd3eap;Cdc73;Cdk7;Cd…
Module3_mef48	macromolecule_metabolic_process	3.0545e-09	6.2458e-07	14143	4465	2651	964	1.15183	0610007P08Rik;0610007P22Rik;1190005F20Rik;2210018M11Rik;2410022L05Rik;2610301G19Rik;4930444A02Rik;A830007P12Rik;Aak1;Aasdhppt;Abca1;Abi2;Abl2;Abt1;Acaca;Actr8;Acvr2a;Acvrl1;Acy1;Adamts3;Adamts4;Adamts9;Adar;Adarb1;Adck1;Adck2;Adck5;Adnp2;Aff1;Aff3;Agl;Ahr;Akap8;Akt3;Alg8;Alg9;Apaf1;Apbb1;Apobec1;Aptx;Aqr;Arid4b;Arih2;Arl6;Arntl;Ascc1;Ascc2;Asf1b;Ash1l;Asxl1;Atad2;Ate1;Atf3;Atf7;Atf7ip;Atg4a;Atg7;…
Module3_mef48	regulation_of_RNA_metabolic_process	3.12608e-09	6.2458e-07	14143	2201	2651	513	1.24345	2210018M11Rik;2410022L05Rik;2610301G19Rik;Ablim1;Abt1;Actr8;Acvrl1;Adar;Adnp2;Aff1;Aff3;Ahr;Apbb1;Apobec1;Arhgef10l;Arhgef11;Arid2;Arid4b;Arntl;Ascc1;Ascc2;Asf1b;Ash1l;Asxl1;Atad2;Atf3;Atf6;Atf7;Atf7ip;Atoh8;Atxn1l;Aurkb;Bach1;Bahd1;Bbx;Bcl9;Bcor;Birc2;Brd8;Brms1;Cbfa2t2;Cbx4;Cc2d1a;Cc2d1b;Ccdc101;Ccdc55;Ccl3;Ccl4;Ccnc;Cdc73;Cdk13;Cdk2;Cdk5;Cdk5rap2;Cdk7;Cdk8;Cdyl;Cebpa;Cebpg;Cebpz;Cenpf;Chaf1a;C…
Module3_mef48	cellular_metabolic_process	3.31694e-09	6.2458e-07	14143	5514	2651	1166	1.12814	0610007P08Rik;0610007P22Rik;1190005F20Rik;1700021K19Rik;2210018M11Rik;2410022L05Rik;2610301G19Rik;2810405K02Rik;4930444A02Rik;4932438A13Rik;9430023L20Rik;A2ld1;A830007P12Rik;AI314976;Aacs;Aak1;Abat;Abca1;Abca3;Abcc1;Abi2;Abl2;Abt1;Acaca;Acad8;Acer3;Acot2;Acox3;Acsf2;Acsl3;Acsl4;Actr8;Acvr2a;Acvrl1;Acy1;Ada;Adar;Adarb1;Adck1;Adck2;Adck4;Adck5;Adcy3;Adi1;Adnp2;Aff1;Aff3;Agk;Agl;Agpat4;Ahcy;Ahr;Akap…
Module3_mef48	regulation_of_nitrogen_compound_metabolic_process	3.48562e-09	6.2458e-07	14143	2536	2651	581	1.22225	2210018M11Rik;2410022L05Rik;2610301G19Rik;Abca1;Ablim1;Abt1;Actr8;Acvrl1;Adar;Adcy3;Adnp2;Aff1;Aff3;Ahr;Amot;Apbb1;Apc;Apobec1;Arhgef10;Arhgef10l;Arhgef11;Arhgef5;Arid2;Arid4b;Arntl;Asap3;Ascc1;Ascc2;Asf1b;Ash1l;Asxl1;Atad2;Atf3;Atf6;Atf7;Atf7ip;Atoh8;Atxn1l;Aurkb;Bach1;Bahd1;Bbx;Bcl9;Bcor;Birc2;Brcc3;Brd8;Brms1;Cbfa2t2;Cbx4;Cc2d1a;Cc2d1b;Ccdc101;Ccdc55;Ccl3;Ccl4;Ccnc;Cdc73;Cdk13;Cdk2;Cdk5;Cdk5ra…
Module3_mef48	regulation_of_cellular_macromolecule_biosynthetic_process	3.87497e-09	6.37439e-07	14143	2341	2651	541	1.2329	2210018M11Rik;2410022L05Rik;2610301G19Rik;Ablim1;Abt1;Actr8;Acvrl1;Adar;Adnp2;Aff1;Aff3;Ahr;Apbb1;Apobec1;Arhgef10l;Arhgef11;Arid2;Arid4b;Arntl;Ascc1;Ascc2;Asf1b;Ash1l;Asxl1;Atad2;Atf3;Atf6;Atf7;Atf7ip;Atoh8;Atxn1l;Aurkb;Bach1;Bahd1;Bbx;Bcl9;Bcor;Birc2;Brd8;Brms1;Casc3;Cbfa2t2;Cbx4;Cc2d1a;Cc2d1b;Ccdc101;Ccl3;Ccnc;Cdc73;Cdk13;Cdk2;Cdk5;Cdk5rap2;Cdk7;Cdk8;Cdyl;Cebpa;Cebpg;Cebpz;Cenpf;Chaf1a;Chaf1b;…
Module3_mef48	chromatin_modification	4.00206e-09	6.37439e-07	14143	344	2651	109	1.69044	2210018M11Rik;2410022L05Rik;Apbb1;Asf1b;Ash1l;Asxl1;Bahd1;Bcor;Brcc3;Brd1;Brd8;Cbx4;Ccdc101;Cdc73;Cdk2;Cebpg;Chd1;Chd9;Crebbp;Csrp2bp;Dmap1;Dnajc2;Dnmt3a;Eed;Ehmt1;Elp4;Ep300;Epc1;Epc2;Eya1;Eya2;Eya3;Ezh2;Hdac4;Hdac6;Hdac8;Hells;Hmg20a;Hmgn5;Hopx;Ing3;Jak2;Kat2b;Kdm2b;Kdm3a;Kdm3b;Kdm4b;Kdm5a;Kdm5d;Kdm6b;L3mbtl3;Leo1;Lrwd1;Mbip;Mbtd1;Mecp2;Med24;Mll5;Myst3;Nr3c1;Phf13;Phf17;Phf2;Phf20;Pim3;Prdm5;P…
Module3_mef48	chromosome_organization	4.98201e-09	7.51759e-07	14143	521	2651	151	1.54622	2210018M11Rik;2410022L05Rik;Akap8;Apbb1;Apc;Arid2;Asf1b;Ash1l;Asxl1;Bahd1;Bcor;Brcc3;Brd1;Brd8;Cbx4;Ccdc101;Cdc73;Cdk2;Cebpg;Cenpc1;Cenpt;Chaf1a;Chaf1b;Chd1;Chd9;Crebbp;Csrp2bp;Dmap1;Dnajc2;Dnmt3a;Eed;Ehmt1;Elp4;Ep300;Epc1;Epc2;Eya1;Eya2;Eya3;Ezh2;Fbxo4;Hdac4;Hdac6;Hdac8;Hells;Hmg20a;Hmgn5;Hopx;Hspa1b;Hspa2;Ing3;Jak2;Kat2b;Kdm2b;Kdm3a;Kdm3b;Kdm4b;Kdm5a;Kdm5d;Kdm6b;L3mbtl3;Lats1;Leo1;Lrwd1;Mau2;Mb…
Module3_mef48	cellular_nitrogen_compound_metabolic_process	6.63153e-09	9.5063e-07	14143	2988	2651	670	1.19626	0610007P08Rik;0610007P22Rik;1190005F20Rik;2210018M11Rik;2410022L05Rik;2610301G19Rik;AI314976;Abca3;Abcc1;Abt1;Acer3;Actr8;Ada;Adar;Adarb1;Adcy3;Adnp2;Aff1;Aff3;Ahr;Akap8;Alas1;Aldh6a1;Apaf1;Apbb1;Apobec1;Aptx;Aqr;Arfrp1;Arid4b;Arl4a;Arntl;Ascc1;Ascc2;Asf1b;Ash1l;Asxl1;Atad2;Atf3;Atf7;Atf7ip;Atoh8;Atp1b1;Atxn1l;B3galnt2;Bach1;Bahd1;Bbx;Bcor;Birc2;Bop1;Brcc3;Brd8;Brms1;Cars2;Casc3;Cbx4;Cc2d1a;Cc2d1…
Module3_mef48	primary_metabolic_process	7.06082e-09	9.6397e-07	14143	5545	2651	1169	1.12472	0610007P08Rik;0610007P22Rik;1190005F20Rik;2210018M11Rik;2410022L05Rik;2610301G19Rik;2810405K02Rik;4930444A02Rik;4932438A13Rik;A2ld1;A830007P12Rik;AI314976;Aacs;Aak1;Abat;Abca1;Abca3;Abcc1;Abi2;Abl2;Abt1;Acaca;Acad8;Acer3;Acot2;Acox3;Acsf2;Acsl3;Acsl4;Actr8;Acvr2a;Acvrl1;Acy1;Ada;Adamts3;Adamts4;Adamts9;Adar;Adarb1;Adck1;Adck2;Adck5;Adcy3;Adi1;Adnp2;Aff1;Aff3;Agk;Agl;Agpat4;Ahcy;Ahr;Akap8;Akt3;Ald…
Module3_mef48	nitrogen_compound_metabolic_process	1.26459e-08	1.648e-06	14143	3074	2651	685	1.18883	0610007P08Rik;0610007P22Rik;1190005F20Rik;2210018M11Rik;2410022L05Rik;2610301G19Rik;4932438A13Rik;AI314976;Abca3;Abcc1;Abt1;Acer3;Actr8;Ada;Adar;Adarb1;Adcy3;Adnp2;Aff1;Aff3;Ahr;Akap8;Alas1;Aldh6a1;Apaf1;Apbb1;Apobec1;Aptx;Aqr;Arfrp1;Arid4b;Arl4a;Arntl;Ascc1;Ascc2;Asf1b;Ash1l;Asxl1;Atad2;Atf3;Atf7;Atf7ip;Atoh8;Atp1b1;Atxn1l;B3galnt2;B4galt7;Bach1;Bahd1;Bbx;Bcor;Birc2;Bop1;Brcc3;Brd8;Brms1;Btd;Car…
Module3_mef48	regulation_of_macromolecule_biosynthetic_process	1.49449e-08	1.86291e-06	14143	2391	2651	547	1.22051	2210018M11Rik;2410022L05Rik;2610301G19Rik;Ablim1;Abt1;Actr8;Acvrl1;Adar;Adnp2;Aff1;Aff3;Ahr;Ankrd13c;Apbb1;Apobec1;Arhgef10l;Arhgef11;Arid2;Arid4b;Arntl;Ascc1;Ascc2;Asf1b;Ash1l;Asxl1;Atad2;Atf3;Atf6;Atf7;Atf7ip;Atoh8;Atxn1l;Aurkb;Bach1;Bahd1;Bbx;Bcl9;Bcor;Birc2;Brd8;Brms1;Casc3;Cbfa2t2;Cbx4;Cc2d1a;Cc2d1b;Ccdc101;Ccl3;Ccnc;Cdc73;Cdk13;Cdk2;Cdk5;Cdk5rap2;Cdk7;Cdk8;Cdyl;Cebpa;Cebpg;Cebpz;Cenpf;Chaf1…
Module3_mef48	organelle_organization	4.90509e-08	5.85954e-06	14143	1486	2651	357	1.28168	1810043G02Rik;2210018M11Rik;2410022L05Rik;2810021B07Rik;Abca1;Abl2;Ablim1;Abr;Actr8;Akap8;Akt3;Aktip;Amot;Ap1g1;Apbb1;Apc;Arhgap10;Arhgap17;Arhgef10;Arhgef18;Arhgef5;Arid2;Asf1b;Ash1l;Asxl1;Atg12;Atg13;Atg16l1;Atg7;Atl2;Aurka;Aurkb;B230120H23Rik;Bahd1;Baiap2;Bcor;Bcr;Bcs1l;Bid;Birc6;Blzf1;Bnip1;Brcc3;Brd1;Brd8;Brsk1;Bub1;Bub1b;Camsap1;Casp7;Cbx4;Ccdc101;Ccl3;Ccng2;Cd2ap;Cdc25b;Cdc73;Cdk2;Cdk5;Cdk…
Module3_mef48	cellular_macromolecule_biosynthetic_process	6.61535e-08	7.58648e-06	14143	2046	2651	472	1.23075	2210018M11Rik;2410022L05Rik;Abca1;Abt1;Actr8;Adar;Adnp2;Aff1;Aff3;Ahr;Alg8;Alg9;Apbb1;Apobec1;Arid4b;Arntl;Ascc1;Ascc2;Asf1b;Ash1l;Asxl1;Atad2;Atf3;Atf7;Atf7ip;Atg7;Atoh8;Atxn1l;B3galnt2;Bach1;Bahd1;Bbx;Bcor;Birc2;Brd8;Brf1;Brms1;C1galt1;Cars2;Cbx4;Cc2d1a;Cc2d1b;Ccdc101;Ccnc;Ccne1;Cd3eap;Cdc73;Cdk7;Cdk8;Cdkn2d;Cdyl;Cebpa;Cebpg;Cebpz;Chaf1a;Chaf1b;Chd1;Chd9;Chst7;Cinp;Clock;Cog3;Cog7;Crcp;Crebbp;C…
Module3_mef48	macromolecule_biosynthetic_process	7.26556e-08	8.01168e-06	14143	2067	2651	476	1.22857	2210018M11Rik;2410022L05Rik;Aasdhppt;Abca1;Abt1;Actr8;Adar;Adnp2;Aff1;Aff3;Ahr;Alg8;Alg9;Apbb1;Apobec1;Arid4b;Arntl;Ascc1;Ascc2;Asf1b;Ash1l;Asxl1;Atad2;Atf3;Atf7;Atf7ip;Atg7;Atoh8;Atxn1l;B3galnt2;B4galt7;Bach1;Bahd1;Bbx;Bcor;Birc2;Brd8;Brf1;Brms1;C1galt1;Cars2;Cbx4;Cc2d1a;Cc2d1b;Ccdc101;Ccnc;Ccne1;Cd3eap;Cdc73;Cdk7;Cdk8;Cdkn2d;Cdyl;Cebpa;Cebpg;Cebpz;Chaf1a;Chaf1b;Chd1;Chd9;Chst7;Cinp;Clock;Cog3;C…
Module3_mef48	chromatin_organization	1.7202e-07	1.8266e-05	14143	392	2651	115	1.56511	2210018M11Rik;2410022L05Rik;Apbb1;Arid2;Asf1b;Ash1l;Asxl1;Bahd1;Bcor;Brcc3;Brd1;Brd8;Cbx4;Ccdc101;Cdc73;Cdk2;Cebpg;Chaf1a;Chaf1b;Chd1;Chd9;Crebbp;Csrp2bp;Dmap1;Dnajc2;Dnmt3a;Eed;Ehmt1;Elp4;Ep300;Epc1;Epc2;Eya1;Eya2;Eya3;Ezh2;Hdac4;Hdac6;Hdac8;Hells;Hmg20a;Hmgn5;Hopx;Ing3;Jak2;Kat2b;Kdm2b;Kdm3a;Kdm3b;Kdm4b;Kdm5a;Kdm5d;Kdm6b;L3mbtl3;Leo1;Lrwd1;Mbip;Mbtd1;Mecp2;Med24;Mll5;Mum1;Myst3;Nr3c1;Phf13;Phf1…
Module3_mef48	covalent_chromatin_modification	1.99346e-07	2.04116e-05	14143	224	2651	74	1.76244	Apbb1;Asxl1;Bcor;Brcc3;Brd1;Brd8;Ccdc101;Cdc73;Cdk2;Crebbp;Csrp2bp;Dmap1;Dnmt3a;Eed;Ehmt1;Elp4;Ep300;Epc1;Eya1;Eya2;Eya3;Ezh2;Hdac4;Hdac6;Hdac8;Hells;Hopx;Ing3;Jak2;Kat2b;Kdm2b;Kdm3a;Kdm5d;Kdm6b;Leo1;Mbip;Mecp2;Med24;Mll5;Myst3;Phf17;Phf2;Phf20;Pim3;Prdm5;Prmt2;Prmt7;Rbbp5;Rcor1;Rest;Ring1;Rnf168;Rnf40;Rnf8;Rtf1;Sap130;Sfpi1;Supt3h;Suv39h1;Suv420h1;Suv420h2;Suz12;Tada1;Tada2a;Tada3;Taf1;Taf5l;Tri…
Module3_mef48	regulation_of_gene_expression	2.26397e-07	2.23821e-05	14143	2515	2651	563	1.19427	2210018M11Rik;2410022L05Rik;2610301G19Rik;Aak1;Ablim1;Abt1;Actr8;Acvrl1;Adar;Adnp2;Aff1;Aff3;Ahr;Ank2;Apbb1;Apobec1;Aptx;Arhgef10l;Arhgef11;Arid2;Arid4b;Arntl;Ascc1;Ascc2;Asf1b;Ash1l;Asxl1;Atad2;Atf3;Atf6;Atf7;Atf7ip;Atoh8;Atxn1l;Aurka;Aurkb;Bach1;Bahd1;Bbx;Bcl9;Bcor;Birc2;Braf;Brd8;Brf1;Brms1;Casc3;Cbfa2t2;Cbx4;Cc2d1a;Cc2d1b;Ccdc101;Ccdc55;Ccl3;Ccnc;Cd59a;Cdc73;Cdk13;Cdk2;Cdk5;Cdk5rap2;Cdk7;Cdk8…
Module3_mef48	regulation_of_cellular_biosynthetic_process	2.35353e-07	2.24919e-05	14143	2461	2651	552	1.19663	2210018M11Rik;2410022L05Rik;2610301G19Rik;Abca1;Ablim1;Abt1;Actr8;Acvrl1;Adar;Adcy3;Adnp2;Aff1;Aff3;Ahr;Apbb1;Apobec1;Arhgef10l;Arhgef11;Arid2;Arid4b;Arntl;Ascc1;Ascc2;Asf1b;Ash1l;Asxl1;Atad2;Atf3;Atf6;Atf7;Atf7ip;Atoh8;Atxn1l;Aurkb;Bach1;Bahd1;Bbx;Bcl9;Bcor;Birc2;Brd8;Brms1;Casc3;Cbfa2t2;Cbx4;Cc2d1a;Cc2d1b;Ccdc101;Ccl3;Ccl4;Ccnc;Cdc73;Cdk13;Cdk2;Cdk5;Cdk5rap2;Cdk7;Cdk8;Cdyl;Cebpa;Cebpg;Cebpz;Cen…
Module3_mef48	metabolic_process	2.66365e-07	2.46345e-05	14143	6288	2651	1295	1.09873	0610007P08Rik;0610007P22Rik;1190005F20Rik;1700021K19Rik;2210018M11Rik;2410022L05Rik;2610029I01Rik;2610301G19Rik;2810405K02Rik;4930444A02Rik;4932438A13Rik;9430023L20Rik;A2ld1;A830007P12Rik;AI314976;Aacs;Aak1;Aasdhppt;Abat;Abca1;Abca3;Abcc1;Abi2;Abl2;Abt1;Acaca;Acad8;Acer3;Acot2;Acox3;Acsf2;Acsl3;Acsl4;Actr8;Acvr2a;Acvrl1;Acy1;Ada;Adamts3;Adamts4;Adamts9;Adar;Adarb1;Adck1;Adck2;Adck4;Adck5;Adcy3;Ad…
Module3_mef48	regulation_of_biosynthetic_process	2.81964e-07	2.52622e-05	14143	2489	2651	557	1.19388	2210018M11Rik;2410022L05Rik;2610301G19Rik;Abca1;Ablim1;Abt1;Actr8;Acvrl1;Adar;Adcy3;Adnp2;Aff1;Aff3;Ahr;Ankrd13c;Apbb1;Apobec1;Arhgef10l;Arhgef11;Arid2;Arid4b;Arntl;Ascc1;Ascc2;Asf1b;Ash1l;Asxl1;Atad2;Atf3;Atf6;Atf7;Atf7ip;Atoh8;Atxn1l;Aurkb;Bach1;Bahd1;Bbx;Bcl9;Bcor;Birc2;Brd8;Brms1;Casc3;Cbfa2t2;Cbx4;Cc2d1a;Cc2d1b;Ccdc101;Ccl3;Ccl4;Ccnc;Cdc73;Cdk13;Cdk2;Cdk5;Cdk5rap2;Cdk7;Cdk8;Cdyl;Cebpa;Cebpg;…
Module3_mef48	histone_modification	5.298e-07	4.60284e-05	14143	221	2651	72	1.73809	Apbb1;Asxl1;Bcor;Brcc3;Brd1;Brd8;Ccdc101;Cdc73;Cdk2;Crebbp;Csrp2bp;Dmap1;Eed;Ehmt1;Elp4;Ep300;Epc1;Eya1;Eya2;Eya3;Ezh2;Hdac4;Hdac6;Hdac8;Hopx;Ing3;Jak2;Kat2b;Kdm2b;Kdm3a;Kdm5d;Kdm6b;Leo1;Mbip;Mecp2;Med24;Mll5;Myst3;Phf17;Phf2;Phf20;Pim3;Prdm5;Prmt2;Prmt7;Rbbp5;Rcor1;Rest;Ring1;Rnf168;Rnf40;Rnf8;Rtf1;Sap130;Sfpi1;Supt3h;Suv39h1;Suv420h1;Suv420h2;Suz12;Tada1;Tada2a;Tada3;Taf1;Taf5l;Trim16;Trrap;Ubr…
Module3_mef48	regulation_of_cellular_metabolic_process	7.14577e-07	6.02557e-05	14143	3250	2651	705	1.15728	1700021K19Rik;2210018M11Rik;2410022L05Rik;2610301G19Rik;Abca1;Ablim1;Abt1;Acsl4;Actr8;Acvr2a;Acvrl1;Adar;Adcy3;Adnp2;Aff1;Aff3;Ahr;Akap1;Akap13;Aktip;Amot;Ankrd13c;Ankrd54;Apbb1;Apc;Apln;Apobec1;Arhgef10;Arhgef10l;Arhgef11;Arhgef5;Arid2;Arid4b;Arntl;Asap3;Ascc1;Ascc2;Asf1b;Ash1l;Asxl1;Atad2;Atf3;Atf6;Atf7;Atf7ip;Atg7;Atoh8;Atxn1l;Aurkb;Avpi1;Bach1;Bahd1;Bbx;Bcl9;Bcor;Birc2;Bmper;Braf;Brcc3;Brd8;B…
Module3_mef48	regulation_of_macromolecule_metabolic_process	8.66107e-07	7.09466e-05	14143	3102	2651	675	1.1609	2210018M11Rik;2410022L05Rik;2610301G19Rik;Aak1;Ablim1;Abt1;Actr8;Acvr2a;Acvrl1;Adar;Adnp2;Aff1;Aff3;Ahr;Akap1;Akap13;Aktip;Ank2;Ankrd13c;Ankrd54;Apbb1;Apc;Apobec1;Aptx;Arhgef10l;Arhgef11;Arid2;Arid4b;Arntl;Ascc1;Ascc2;Asf1b;Ash1l;Asxl1;Atad2;Atf3;Atf6;Atf7;Atf7ip;Atg7;Atoh8;Atxn1l;Aurka;Aurkb;Avpi1;Bach1;Bahd1;Bbx;Bcl9;Bcor;Birc2;Bmper;Braf;Brcc3;Brd8;Brf1;Brms1;C2cd3;Camkk2;Casc3;Cbfa2t2;Cblb;Cb…
Module3_mef48	regulation_of_metabolic_process	1.73402e-06	0.000138096	14143	3671	2651	784	1.13937	0610009O20Rik;1190002H23Rik;1700021K19Rik;2210018M11Rik;2410022L05Rik;2610301G19Rik;Aak1;Abca1;Abl2;Ablim1;Abt1;Acsl4;Actr8;Acvr2a;Acvrl1;Adar;Adcy3;Adnp2;Aff1;Aff3;Ahr;Akap1;Akap13;Aktip;Amot;Ank2;Ankrd13c;Ankrd54;Apaf1;Apbb1;Apc;Apln;Apobec1;Aptx;Arfgef2;Arhgef10;Arhgef10l;Arhgef11;Arhgef18;Arhgef5;Arid2;Arid4b;Arntl;Asap3;Ascc1;Ascc2;Asf1b;Ash1l;Asxl1;Atad2;Atf3;Atf6;Atf7;Atf7ip;Atg7;Atoh8;Atx…
Module3_mef48	regulation_of_primary_metabolic_process	2.09145e-06	0.000162059	14143	3191	2651	689	1.15193	2210018M11Rik;2410022L05Rik;2610301G19Rik;Abca1;Ablim1;Abt1;Acsl4;Actr8;Acvr2a;Acvrl1;Adar;Adcy3;Adnp2;Aff1;Aff3;Ahr;Akap1;Akap13;Aktip;Amot;Ankrd54;Apbb1;Apc;Apobec1;Arhgef10;Arhgef10l;Arhgef11;Arhgef5;Arid2;Arid4b;Arntl;Asap3;Ascc1;Ascc2;Asf1b;Ash1l;Asxl1;Atad2;Atf3;Atf6;Atf7;Atf7ip;Atg7;Atoh8;Atxn1l;Aurkb;Avpi1;Bach1;Bahd1;Bbx;Bcl9;Bcor;Birc2;Bmper;Braf;Brcc3;Brd8;Brms1;C2cd3;Camkk2;Casc3;Cbfa…
Module3_mef48	mitotic_cell_cycle	3.04285e-06	0.000229575	14143	361	2651	103	1.52217	2810021B07Rik;Actr8;Akap8;Apc;Arhgef10;Aurka;Aurkb;Bach1;Birc6;Brsk1;Bub1;Bub1b;Ccng2;Cd2ap;Cdc25b;Cdk2;Cdk5rap2;Cdkn2c;Cdkn2d;Cenpc1;Cenpf;Cenpt;Cep164;Cep250;Cep63;Chfr;Clasp1;Clasp2;Dbf4;Dlgap5;Dnajc2;Dsn1;E2f1;E2f6;Eya1;Ezh2;Fbxl7;Fer;Foxm1;Foxo4;Haus1;Haus2;Haus4;Haus7;Haus8;Hells;Hspa2;Id4;Katna1;Kif11;Kif23;Kif2c;Kif3b;Klf11;Lats1;Lrwd1;Lsm10;Mad1l1;Mad2l2;Mapre3;Mau2;Mis12;Mnat1;Nbn;Ncapg…
Module3_mef48	macromolecule_modification	4.74536e-06	0.000348845	14143	1615	2651	370	1.22225	4930444A02Rik;Aak1;Abca1;Abi2;Abl2;Acvr2a;Acvrl1;Adar;Adarb1;Adck1;Adck2;Adck5;Akt3;Alg8;Alg9;Apbb1;Apobec1;Arih2;Arl6;Asxl1;Ate1;Atf7ip;Atg7;Aurka;Aurkb;Avpi1;B230120H23Rik;B3galnt2;Bcor;Bcr;Birc2;Birc6;Bmp2k;Braf;Brcc3;Brd1;Brd8;Brsk1;Bub1;Bub1b;C1galt1;C230081A13Rik;Camkk2;Cblb;Ccdc101;Ccl3;Ccne1;Cdc25b;Cdc42bpg;Cdc73;Cdk10;Cdk13;Cdk18;Cdk2;Cdk5;Cdk7;Cdk8;Cdkn3;Chfr;Cog3;Cog7;Cops7b;Crebbp;Csn…
Module3_mef48	cellular_component_organization_or_biogenesis_at_cellular_level	6.62106e-06	0.000474564	14143	2243	2651	496	1.17973	0610007P22Rik;1810043G02Rik;2210018M11Rik;2410003K15Rik;2410022L05Rik;2810021B07Rik;Abca1;Abi2;Abl2;Ablim1;Abr;Acsl4;Actr8;Akap8;Akt3;Aktip;Amot;Ap1g1;Apaf1;Apbb1;Apc;Arhgap10;Arhgap17;Arhgef10;Arhgef18;Arhgef5;Arid2;Arl6;Asf1b;Ash1l;Asxl1;Atg12;Atg13;Atg16l1;Atg7;Atl2;Aurka;Aurkb;B230120H23Rik;B4galt7;B9d1;B9d2;Bahd1;Baiap2;Bbs5;Bcor;Bcr;Bcs1l;Bid;Bin3;Birc6;Blzf1;Bnip1;Bop1;Brcc3;Brd1;Brd8;Brsk…
Module3_mef48	phosphorylation	1.19427e-05	0.000835113	14143	860	2651	210	1.30272	4930444A02Rik;Aak1;Abi2;Abl2;Acvr2a;Acvrl1;Adck1;Adck2;Adck4;Adck5;Agk;Akap8;Akap8l;Akt3;Aurka;Aurkb;Avpi1;B230120H23Rik;Bcr;Bmp2k;Bpnt1;Braf;Brsk1;Bub1;Bub1b;C230081A13Rik;Camkk2;Ccl3;Ccne1;Cdc25b;Cdc42bpg;Cdk10;Cdk13;Cdk18;Cdk2;Cdk5;Cdk7;Cdk8;Cdkn2c;Cdkn2d;Chka;Chkb;Coasy;Col4a3bp;Coq7;Csnk1g3;Cspg4;Cycs;D8Ertd82e;Dapk1;Dbf4;Dgka;Dgkd;Dgkz;Dyrk1a;Dyrk2;Efna1;Eif2ak1;Eif2ak2;Eif2ak3;Epha2;Ephb3;…
Module4_mef48	cellular_metabolic_process	3.03271e-21	8.70085e-18	14143	5514	2475	1174	1.21666	0610009D07Rik;1110037F02Rik;2010111I01Rik;AI462493;Abcc5;Abcd3;Abcg2;Abhd5;Acadm;Acads;Acadsb;Acd;Aco1;Acot9;Acox1;Acp1;Acp2;Acsl5;Actl6a;Acvr1;Adam8;Adc;Adcy6;Adipor2;Adpgk;Adrbk1;Adsl;Aebp2;Afg3l1;Afg3l2;Aga;Agap3;Agpat1;Agpat2;Agpat3;Agpat6;Agrn;Agtr1a;Ahctf1;Aifm1;Aimp2;Ak5;Akirin2;Akr1b8;Akr7a5;Alad;Aldh1l2;Aldh3a1;Aldh3a2;Aldh9a1;Aldoc;Alg2;Alkbh3;Alox5ap;Amd1;Ampd2;Anapc16;Anapc7;Angpt1;An…
Module4_mef48	metabolic_process	1.03621e-18	1.48644e-15	14143	6288	2475	1298	1.17958	0610007P14Rik;0610009D07Rik;1110037F02Rik;2010111I01Rik;4833439L19Rik;4933434E20Rik;A4galt;AI462493;Abcc5;Abcd3;Abcg2;Abhd16a;Abhd5;Acad9;Acadm;Acads;Acadsb;Acat1;Acat2;Acbd3;Acd;Aco1;Acot9;Acox1;Acp1;Acp2;Acsl5;Actl6a;Acvr1;Adam12;Adam17;Adam19;Adam23;Adam8;Adamts10;Adamts12;Adamts2;Adc;Adcy6;Adipor2;Adpgk;Adrbk1;Adsl;Aebp2;Afg3l1;Afg3l2;Aga;Agap3;Agpat1;Agpat2;Agpat3;Agpat6;Agps;Agrn;Agtr1a;Ahc…
Module4_mef48	cellular_process	1.73023e-16	1.65468e-13	14143	8865	2475	1728	1.11386	0610009D07Rik;1110037F02Rik;1190002N15Rik;1600012H06Rik;2010111I01Rik;2310016M24Rik;2510003E04Rik;2810002N01Rik;3200002M19Rik;4930453N24Rik;9430020K01Rik;A4galt;AI462493;Aaas;Aatf;Abcc5;Abcd3;Abcg2;Abhd5;Acadm;Acads;Acadsb;Acap2;Acd;Aco1;Acot9;Acox1;Acp1;Acp2;Acsl5;Actl6a;Acvr1;Adam12;Adam17;Adam19;Adam23;Adam8;Adamts2;Adamtsl4;Adc;Adcy6;Adipor2;Adpgk;Adrbk1;Adsl;Aebp2;Aen;Afg3l1;Afg3l2;Aga;Agap3…
Module4_mef48	primary_metabolic_process	2.542e-16	1.82325e-13	14143	5545	2475	1151	1.18615	0610007P14Rik;0610009D07Rik;1110037F02Rik;2010111I01Rik;A4galt;Abcc5;Abcd3;Abhd5;Acadm;Acads;Acadsb;Acbd3;Acd;Acox1;Acp1;Acsl5;Actl6a;Acvr1;Adam12;Adam17;Adam19;Adam23;Adam8;Adamts10;Adamts12;Adamts2;Adc;Adcy6;Adipor2;Adpgk;Adrbk1;Adsl;Aebp2;Afg3l1;Afg3l2;Aga;Agap3;Agpat1;Agpat2;Agpat3;Agpat6;Agps;Agtr1a;Ahctf1;Aifm1;Aimp2;Ak5;Akirin2;Akr1b8;Aldh9a1;Aldoc;Alg2;Alkbh3;Alox5ap;Ampd2;Amz2;Anapc16;An…
Module4_mef48	cellular_macromolecule_metabolic_process	3.48652e-14	2.00057e-11	14143	4112	2475	876	1.21736	0610009D07Rik;1110037F02Rik;Acadm;Acd;Acp1;Actl6a;Acvr1;Adam8;Adrbk1;Aebp2;Afg3l1;Afg3l2;Aga;Agap3;Agrn;Agtr1a;Ahctf1;Aifm1;Aimp2;Akirin2;Alg2;Alkbh3;Anapc16;Anapc7;Aplp1;Arid1a;Arnt;Arrb2;Ash2l;Asl;Atf1;Atf2;Atf6b;Atg3;Atg5;Atn1;Atrx;Atxn7l3;Auh;Axin1;B3galnt1;B3gnt1;Bace1;Bap1;Baz1b;Bcl10;Bcl9l;Bclaf1;Birc5;Bmi1;Bmpr2;Bptf;Brap;Brd4;Brd7;Bre;Brms1l;Brwd1;Btg1;Bzw2;C1d;C80913;Cad;Calcoco1;Camk2g…
Module4_mef48	cellular_protein_metabolic_process	3.49707e-13	1.67218e-10	14143	2060	2475	479	1.32872	Acp1;Actl6a;Acvr1;Adam8;Adrbk1;Afg3l1;Afg3l2;Aga;Agap3;Agtr1a;Aimp2;Alg2;Anapc16;Anapc7;Arrb2;Ash2l;Asl;Atg3;Atg5;Atxn7l3;Axin1;B3galnt1;Bap1;Baz1b;Bcl10;Birc5;Bmi1;Bmpr2;Brap;Brd4;Btg1;C80913;Cad;Camk2g;Cask;Ccnb1;Ccnh;Cdc20;Cdc23;Cdc27;Cdc42bpa;Cdc42bpb;Cdk11b;Cdk14;Chordc1;Chst12;Chst14;Chuk;Clk2;Clk3;Clk4;Clpp;Clpx;Cpne3;Crbn;Creb1;Csf1r;Csgalnact1;Csk;Csnk1e;Csnk2a2;Ctr9;Cul2;Cul4a;Cul4b;Cul…
Module4_mef48	macromolecule_metabolic_process	5.7439e-13	2.35418e-10	14143	4465	2475	933	1.19406	0610009D07Rik;1110037F02Rik;2010111I01Rik;Acadm;Acd;Acp1;Actl6a;Acvr1;Adam12;Adam17;Adam19;Adam23;Adam8;Adamts10;Adamts12;Adamts2;Adrbk1;Aebp2;Afg3l1;Afg3l2;Aga;Agap3;Agrn;Agtr1a;Ahctf1;Aifm1;Aimp2;Akirin2;Alg2;Alkbh3;Amz2;Anapc16;Anapc7;Angpt1;Anpep;Aplp1;Arid1a;Arnt;Arrb2;Ash2l;Asl;Atf1;Atf2;Atf6b;Atg3;Atg4b;Atg5;Atn1;Atrx;Atxn7l3;Auh;Axin1;B3galnt1;B3gnt1;Bace1;Bap1;Baz1b;Bcl10;Bcl9l;Bclaf1;Bi…
Module4_mef48	protein_metabolic_process	2.02504e-11	7.2623e-09	14143	2414	2475	538	1.27354	2010111I01Rik;Acp1;Actl6a;Acvr1;Adam12;Adam17;Adam19;Adam23;Adam8;Adamts10;Adamts12;Adamts2;Adrbk1;Afg3l1;Afg3l2;Aga;Agap3;Agtr1a;Aimp2;Alg2;Amz2;Anapc16;Anapc7;Anpep;Arrb2;Ash2l;Asl;Atg3;Atg4b;Atg5;Atxn7l3;Axin1;B3galnt1;Bace1;Bap1;Baz1b;Bcl10;Birc5;Blmh;Bmi1;Bmpr2;Brap;Brd4;Btg1;C80913;Cad;Camk2g;Capn1;Capn7;Cask;Casp3;Casp6;Ccnb1;Ccnh;Cd55;Cdc20;Cdc23;Cdc27;Cdc42bpa;Cdc42bpb;Cdk11b;Cdk14;Cflar…
Module4_mef48	cellular_component_organization_or_biogenesis	9.01276e-11	2.41088e-08	14143	2691	2475	587	1.2465	2310016M24Rik;3200002M19Rik;A4galt;Aatf;Abcd3;Acadm;Acads;Acat1;Acd;Acp2;Actl6a;Adam8;Adamts2;Adamtsl4;Adsl;Aebp2;Afg3l1;Afg3l2;Agap3;Agfg1;Agrn;Ahctf1;Aifm1;Alad;Alcam;Aldoc;Alox5ap;Anapc16;Anapc7;Angpt1;Angptl4;Anln;Ano6;Ap1b1;Ap1m1;Ap3b1;Apbb2;Aplp1;Arfip2;Arhgap21;Arhgap5;Arhgef17;Arid1a;Arl2;Arpc5l;Asap1;Ash2l;Atf1;Atg3;Atg4b;Atg5;Atg9a;Atp2c1;Atpaf2;Atxn2;Atxn7l3;Axin1;Bad;Bak1;Bap1;Baz1b;B…
Module4_mef48	cellular_protein_modification_process	9.24352e-11	2.41088e-08	14143	1541	2475	363	1.34608	Acp1;Actl6a;Acvr1;Adam8;Adrbk1;Aga;Agtr1a;Alg2;Anapc16;Anapc7;Arrb2;Ash2l;Asl;Atg3;Atg5;Atxn7l3;Axin1;B3galnt1;Bap1;Baz1b;Bcl10;Birc5;Bmi1;Bmpr2;Brap;Brd4;Btg1;Cad;Camk2g;Cask;Ccnb1;Ccnh;Cdc23;Cdc27;Cdc42bpa;Cdc42bpb;Cdk11b;Cdk14;Chuk;Clk2;Clk3;Clk4;Cpne3;Crbn;Creb1;Csf1r;Csk;Csnk1e;Csnk2a2;Ctr9;Cxxc1;Cyhr1;Dab2ip;Dapk3;Dclk1;Ddr1;Dguok;Dmpk;Dohh;Dpagt1;Dpm2;Dpm3;Dpy30;Dr1;Dusp11;Dusp12;Dusp3;Eef…
Module4_mef48	protein_modification_process	9.24352e-11	2.41088e-08	14143	1541	2475	363	1.34608	Acp1;Actl6a;Acvr1;Adam8;Adrbk1;Aga;Agtr1a;Alg2;Anapc16;Anapc7;Arrb2;Ash2l;Asl;Atg3;Atg5;Atxn7l3;Axin1;B3galnt1;Bap1;Baz1b;Bcl10;Birc5;Bmi1;Bmpr2;Brap;Brd4;Btg1;Cad;Camk2g;Cask;Ccnb1;Ccnh;Cdc23;Cdc27;Cdc42bpa;Cdc42bpb;Cdk11b;Cdk14;Chuk;Clk2;Clk3;Clk4;Cpne3;Crbn;Creb1;Csf1r;Csk;Csnk1e;Csnk2a2;Ctr9;Cxxc1;Cyhr1;Dab2ip;Dapk3;Dclk1;Ddr1;Dguok;Dmpk;Dohh;Dpagt1;Dpm2;Dpm3;Dpy30;Dr1;Dusp11;Dusp12;Dusp3;Eef…
Module4_mef48	macromolecule_modification	1.95308e-10	4.66949e-08	14143	1615	2475	376	1.3304	Acp1;Actl6a;Acvr1;Adam8;Adrbk1;Aga;Agtr1a;Alg2;Alkbh3;Anapc16;Anapc7;Arrb2;Ash2l;Asl;Atg3;Atg5;Atxn7l3;Axin1;B3galnt1;Bap1;Baz1b;Bcl10;Birc5;Bmi1;Bmpr2;Brap;Brd4;Btg1;Cad;Camk2g;Cask;Ccnb1;Ccnh;Cdc23;Cdc27;Cdc42bpa;Cdc42bpb;Cdk11b;Cdk14;Chuk;Clk2;Clk3;Clk4;Cpne3;Crbn;Creb1;Csf1r;Csk;Csnk1e;Csnk2a2;Ctcf;Ctr9;Cxxc1;Cyhr1;Dab2ip;Dapk3;Dclk1;Ddr1;Dguok;Dkc1;Dmpk;Dnmt1;Dohh;Dpagt1;Dpm2;Dpm3;Dpy30;Dr1;…
Module4_mef48	cellular_component_organization_or_biogenesis_at_cellular_level	8.16983e-10	1.80302e-07	14143	2243	2475	495	1.26108	2310016M24Rik;3200002M19Rik;Aatf;Abcd3;Acd;Acp2;Actl6a;Adamts2;Adamtsl4;Aebp2;Afg3l1;Afg3l2;Agap3;Agfg1;Agrn;Ahctf1;Aifm1;Alcam;Anapc16;Anapc7;Angpt1;Anln;Ap1b1;Ap1m1;Ap3b1;Apbb2;Aplp1;Arfip2;Arhgap21;Arhgef17;Arid1a;Arl2;Asap1;Ash2l;Atf1;Atg3;Atg4b;Atg5;Atg9a;Atp2c1;Atpaf2;Atxn2;Atxn7l3;Axin1;Bad;Bak1;Bap1;Baz1b;Bcar1;Bcl2l1;Bet1;Bicd2;Birc5;Bmi1;Boc;Bptf;Brd4;Bre;Brix1;Brwd1;Bscl2;C1d;Casp3;Cav…
Module4_mef48	nitrogen_compound_metabolic_process	3.7558e-09	7.69671e-07	14143	3074	2475	648	1.20459	0610009D07Rik;1110037F02Rik;Abcc5;Abcd3;Abcg2;Acadm;Acd;Actl6a;Adc;Adcy6;Adsl;Aebp2;Agpat6;Ahctf1;Aifm1;Ak5;Akirin2;Akr1b8;Akr7a5;Alad;Aldh1l2;Aldh9a1;Alkbh3;Amd1;Ampd2;Angpt1;Aplp1;Arid1a;Arl2;Arnt;Arrb2;Ash2l;Asl;Atad1;Atf1;Atf2;Atf6b;Atn1;Atp2c1;Atp6v1a;Atp6v1b2;Atp6v1c1;Atrx;Atxn7l3;Auh;Axin1;Azin1;B3gnt1;Bad;Baz1b;Bcl9l;Bclaf1;Birc5;Blvra;Blvrb;Bmi1;Bmpr2;Bptf;Brd7;Bre;Brms1l;Brwd1;Bzw2;C1d;…
Module4_mef48	organelle_organization	4.06079e-09	7.76693e-07	14143	1486	2475	343	1.31899	2310016M24Rik;3200002M19Rik;Abcd3;Acd;Acp2;Actl6a;Aebp2;Afg3l1;Afg3l2;Agap3;Agfg1;Ahctf1;Aifm1;Anapc16;Anapc7;Anln;Ap1b1;Ap1m1;Ap3b1;Arfip2;Arhgap21;Arhgef17;Arid1a;Arl2;Ash2l;Atg3;Atg4b;Atg5;Atg9a;Atp2c1;Atxn7l3;Axin1;Bad;Bak1;Bap1;Baz1b;Bcar1;Bcl2l1;Bet1;Bicd2;Birc5;Bmi1;Bptf;Brd4;Bre;Brwd1;Bscl2;Casp3;Cav2;Ccna2;Ccnb1;Ccnb2;Ccnk;Cd24a;Cdc20;Cdc23;Cdc27;Cdc42bpa;Cdc42bpb;Cdca3;Cdca8;Cenpa;Cetn2…
Module4_mef48	cellular_nitrogen_compound_metabolic_process	1.23388e-08	2.2125e-06	14143	2988	2475	628	1.20101	0610009D07Rik;1110037F02Rik;Abcc5;Abcd3;Abcg2;Acadm;Acd;Actl6a;Adc;Adcy6;Adsl;Aebp2;Agpat6;Ahctf1;Aifm1;Ak5;Akirin2;Alad;Aldh1l2;Aldh9a1;Alkbh3;Amd1;Ampd2;Aplp1;Arid1a;Arl2;Arnt;Arrb2;Ash2l;Asl;Atad1;Atf1;Atf2;Atf6b;Atn1;Atp2c1;Atp6v1a;Atp6v1b2;Atp6v1c1;Atrx;Atxn7l3;Auh;Axin1;Azin1;Bad;Baz1b;Bcl9l;Bclaf1;Birc5;Blvra;Blvrb;Bmi1;Bmpr2;Bptf;Brd7;Bre;Brms1l;Brwd1;Bzw2;C1d;C80913;Cad;Calcoco1;Cant1;Ca…
Module4_mef48	ribonucleoprotein_complex_biogenesis	2.26646e-08	3.82498e-06	14143	199	2475	67	1.92392	Aatf;Atxn2;Brix1;C1d;Celf1;Cirbp;Cnot7;Dcaf13;Ddx47;Ddx56;Dkc1;Drosha;Eif2a;Emg1;Exosc10;Exosc5;Exosc8;Exosc9;Fam103a1;Fcf1;Frg1;Ftsj3;Gar1;Gnl1;Gnl2;Gnl3;Gnl3l;Gtpbp4;Imp4;Isg20l2;Las1l;Lsg1;Lsm2;Lsm6;Mrpl10;Mrto4;Nhp2;Nmd3;Nob1;Nop10;Nop14;Nop58;Pop4;Pqbp1;Prmt5;Prpf31;Prpf6;Rbfa;Rbm5;Rbmxl1;Rpf1;Rpl5;Rrn3;Rrp36;Rrs1;Sbds;Scaf11;Skiv2l2;Slu7;Srpk2;Tbl3;Tfb2m;Tsr1;Utp11l;Utp6;Wbp11;Zrsr2
Module4_mef48	cellular_component_biogenesis_at_cellular_level	2.71375e-08	4.32541e-06	14143	212	2475	70	1.88681	Aatf;Atpaf2;Atxn2;Brix1;C1d;Celf1;Cirbp;Cnot7;Dcaf13;Ddx47;Ddx56;Dkc1;Drosha;Eif2a;Emg1;Exosc10;Exosc5;Exosc8;Exosc9;Fam103a1;Fcf1;Frg1;Ftsj3;Gar1;Gnl1;Gnl2;Gnl3;Gnl3l;Gtpbp4;Imp4;Isg20l2;Las1l;Lsg1;Lsm2;Lsm6;Mrpl10;Mrto4;Nhp2;Nmd3;Nob1;Nop10;Nop14;Nop58;Oxa1l;Pop4;Pqbp1;Prmt5;Prpf31;Prpf6;Rbfa;Rbm5;Rbmxl1;Rpf1;Rpl5;Rrn3;Rrp36;Rrs1;Sbds;Scaf11;Skiv2l2;Slu7;Srpk2;Tbl3;Tfb2m;Tmem70;Tsr1;Utp11l;Utp6…
Module4_mef48	cellular_component_biogenesis	1.71804e-07	2.59423e-05	14143	1076	2475	252	1.3383	2310016M24Rik;Aatf;Acadm;Acads;Acat1;Acd;Adsl;Agfg1;Agrn;Ahctf1;Aifm1;Alad;Aldoc;Alox5ap;Angpt1;Angptl4;Ap1b1;Atf1;Atg3;Atg4b;Atg5;Atg9a;Atpaf2;Atxn2;Axin1;Bad;Bcl10;Brix1;C1d;C1qtnf1;C1qtnf5;Cat;Cav2;Cby1;Ccdc109a;Ccnb1;Cdh13;Cdh2;Celf1;Cenpa;Ciao1;Cirbp;Clpp;Cnot7;Cog4;Coro1a;Cpsf6;Ctcf;Dcaf13;Dctpp1;Dcxr;Ddx47;Ddx56;Decr1;Dhrs4;Dkc1;Dlc1;Dlg4;Dnm1l;Drosha;Dst;Dync2li1;E2f4;Ehd4;Eif2a;Emg1;Eps1…
Module4_mef48	cellular_component_organization	2.13998e-07	3.0698e-05	14143	2565	2475	539	1.20079	2310016M24Rik;3200002M19Rik;A4galt;Abcd3;Acadm;Acads;Acat1;Acd;Acp2;Actl6a;Adam8;Adamts2;Adamtsl4;Adsl;Aebp2;Afg3l1;Afg3l2;Agap3;Agfg1;Agrn;Ahctf1;Aifm1;Alad;Alcam;Aldoc;Alox5ap;Anapc16;Anapc7;Angpt1;Angptl4;Anln;Ano6;Ap1b1;Ap1m1;Ap3b1;Apbb2;Aplp1;Arfip2;Arhgap21;Arhgap5;Arhgef17;Arid1a;Arl2;Arpc5l;Asap1;Ash2l;Atf1;Atg3;Atg4b;Atg5;Atg9a;Atp2c1;Atpaf2;Atxn2;Atxn7l3;Axin1;Bad;Bak1;Bap1;Baz1b;Bcar1;…
Module4_mef48	nucleobase-containing_compound_metabolic_process	3.53538e-07	4.83e-05	14143	2863	2475	593	1.18359	0610009D07Rik;1110037F02Rik;Abcc5;Abcd3;Acd;Actl6a;Adcy6;Adsl;Aebp2;Ahctf1;Aifm1;Ak5;Akirin2;Alkbh3;Ampd2;Aplp1;Arid1a;Arl2;Arnt;Arrb2;Ash2l;Atad1;Atf1;Atf2;Atf6b;Atn1;Atp2c1;Atp6v1a;Atp6v1b2;Atp6v1c1;Atrx;Atxn7l3;Auh;Axin1;Bad;Baz1b;Bcl9l;Bclaf1;Birc5;Bmi1;Bmpr2;Bptf;Brd7;Bre;Brms1l;Brwd1;Bzw2;C1d;C80913;Cad;Calcoco1;Cant1;Casp3;Ccar1;Ccdc59;Ccnh;Ccnk;Ccnl2;Cdc5l;Cebpb;Celf1;Cenpa;Cetn2;Cggbp1;C…
Module4_mef48	ribosome_biogenesis	4.69005e-07	6.11625e-05	14143	148	2475	51	1.96913	Aatf;Brix1;C1d;Dcaf13;Ddx47;Ddx56;Dkc1;Drosha;Eif2a;Emg1;Exosc10;Exosc5;Exosc8;Exosc9;Fcf1;Frg1;Ftsj3;Gar1;Gnl1;Gnl2;Gnl3;Gnl3l;Gtpbp4;Imp4;Isg20l2;Las1l;Lsg1;Lsm6;Mrpl10;Mrto4;Nhp2;Nmd3;Nob1;Nop10;Nop14;Nop58;Pop4;Rbfa;Rpf1;Rpl5;Rrn3;Rrp36;Rrs1;Sbds;Skiv2l2;Tbl3;Tfb2m;Tsr1;Utp11l;Utp6;Wbp11
Module4_mef48	gene_expression	1.45764e-06	0.000181825	14143	2319	2475	486	1.19757	0610009D07Rik;1110037F02Rik;Actl6a;Adamts2;Aebp2;Afg3l1;Afg3l2;Aga;Ahctf1;Aimp2;Akirin2;Alg2;Aplp1;Arid1a;Arnt;Arrb2;Ash2l;Atf1;Atf2;Atf6b;Atn1;Atxn7l3;B3galnt1;Baz1b;Bcl9l;Bclaf1;Birc5;Bmi1;Bmpr2;Bptf;Brd7;Brms1l;Brwd1;C1d;C80913;Calcoco1;Capn1;Casp3;Ccar1;Ccdc59;Ccnh;Ccnk;Ccnl2;Cdc5l;Cebpb;Celf1;Cggbp1;Chd8;Cherp;Chst12;Chst14;Cic;Cnot1;Cnot2;Cnot3;Cnot6;Cnot7;Cnot8;Cobra1;Cpsf3;Cpsf6;Creb1;Cre…
Module4_mef48	cellular_component_organization_at_cellular_level	1.53857e-06	0.000183923	14143	2124	2475	449	1.20798	2310016M24Rik;3200002M19Rik;Abcd3;Acd;Acp2;Actl6a;Adamts2;Adamtsl4;Aebp2;Afg3l1;Afg3l2;Agap3;Agfg1;Agrn;Ahctf1;Aifm1;Alcam;Anapc16;Anapc7;Angpt1;Anln;Ap1b1;Ap1m1;Ap3b1;Apbb2;Aplp1;Arfip2;Arhgap21;Arhgef17;Arid1a;Arl2;Asap1;Ash2l;Atf1;Atg3;Atg4b;Atg5;Atg9a;Atp2c1;Atpaf2;Atxn2;Atxn7l3;Axin1;Bad;Bak1;Bap1;Baz1b;Bcar1;Bcl2l1;Bet1;Bicd2;Birc5;Bmi1;Boc;Bptf;Brd4;Bre;Brwd1;Bscl2;Casp3;Cav2;Cby1;Ccna2;Cc…
Module4_mef48	phosphate-containing_compound_metabolic_process	1.87922e-06	0.000207365	14143	1036	2475	238	1.31275	AI462493;Acp1;Acp2;Acvr1;Adam8;Adpgk;Adrbk1;Agtr1a;Ak5;Aldoc;Axin1;Baz1b;Bcl10;Birc5;Bmpr2;Brd4;Cad;Camk2g;Cask;Ccnb1;Ccnh;Cdc42bpa;Cdc42bpb;Cdk11b;Cdk14;Cdkn2b;Chuk;Cks2;Clk2;Clk3;Clk4;Cpne3;Creb1;Csf1r;Csk;Csnk1e;Csnk2a2;Dab2ip;Dapk3;Dcakd;Dclk1;Ddr1;Dguok;Dmpk;Dusp11;Dusp12;Dusp3;Eef2k;Egfr;Eif2a;Eif2s1;Epha3;Ephb2;Ephb4;Ercc3;Fam20b;Fbxw11;Fgfr2;Fgfrl1;Frs2;Fyn;G6pc3;G6pdx;Gak;Galk2;Gfpt1;Git…
Module4_mef48	phosphorus_metabolic_process	1.87922e-06	0.000207365	14143	1036	2475	238	1.31275	AI462493;Acp1;Acp2;Acvr1;Adam8;Adpgk;Adrbk1;Agtr1a;Ak5;Aldoc;Axin1;Baz1b;Bcl10;Birc5;Bmpr2;Brd4;Cad;Camk2g;Cask;Ccnb1;Ccnh;Cdc42bpa;Cdc42bpb;Cdk11b;Cdk14;Cdkn2b;Chuk;Cks2;Clk2;Clk3;Clk4;Cpne3;Creb1;Csf1r;Csk;Csnk1e;Csnk2a2;Dab2ip;Dapk3;Dcakd;Dclk1;Ddr1;Dguok;Dmpk;Dusp11;Dusp12;Dusp3;Eef2k;Egfr;Eif2a;Eif2s1;Epha3;Ephb2;Ephb4;Ercc3;Fam20b;Fbxw11;Fgfr2;Fgfrl1;Frs2;Fyn;G6pc3;G6pdx;Gak;Galk2;Gfpt1;Git…
Module4_mef48	RNA_processing	2.84623e-06	0.000302438	14143	478	2475	123	1.47043	0610009D07Rik;1110037F02Rik;Aplp1;C1d;Ccnl2;Cdc5l;Celf1;Cherp;Cnot7;Cpsf3;Cpsf6;Dcaf13;Ddx39;Ddx46;Ddx47;Ddx54;Ddx56;Dhx38;Dkc1;Drosha;Emg1;Exosc10;Exosc5;Exosc8;Exosc9;Fam103a1;Fcf1;Fip1l1;Frg1;Ftsj3;Ftsjd2;Gar1;Hnrpll;Imp4;Ints10;Ints3;Ints8;Isy1;Jmjd6;Khsrp;Las1l;Lsm2;Lsm4;Lsm5;Lsm6;Luc7l3;Magohb;Naa38;Ncbp1;Nhp2;Nob1;Nop10;Nop14;Nsun2;Osgep;Paf1;Papd4;Parn;Phf5a;Plrg1;Pnn;Pop4;Ppie;Ppil1;Ppp1…
Module4_mef48	chromatin_modification	3.01229e-06	0.000308652	14143	344	2475	94	1.56148	Actl6a;Aebp2;Arid1a;Ash2l;Atxn7l3;Bap1;Baz1b;Bmi1;Bptf;Brd4;Bre;Ccnb1;Chd8;Ctcf;Ctr9;Cxxc1;Dapk3;Dnmt1;Dpy30;Dr1;Eny2;Ep400;Eya4;H2afy2;Hat1;Hcfc1;Hdac5;Hira;Hjurp;Hmga2;Ing4;Jmjd6;Kat2a;Kat5;Kdm1a;Kdm2a;Kdm4a;Kdm5b;Kdm5c;Map3k7;Mcrs1;Meaf6;Men1;Mgea5;Msl1;Msl3;Myst2;Nasp;Nat15;Nsd1;Paf1;Pbrm1;Pcgf2;Phb;Phf21a;Pkn1;Pole3;Pole4;Prkca;Prmt5;Rbm14;Rere;Rnf2;Rnf20;Rps6ka4;Ruvbl1;Ruvbl2;Rybp;Setd2;Set…
Module4_mef48	histone_modification	3.81969e-06	0.000377886	14143	221	2475	66	1.70655	Actl6a;Ash2l;Atxn7l3;Bap1;Baz1b;Bmi1;Brd4;Ccnb1;Ctr9;Cxxc1;Dpy30;Dr1;Eny2;Ep400;Hat1;Hcfc1;Hdac5;Hmga2;Ing4;Jmjd6;Kat2a;Kat5;Kdm1a;Kdm2a;Kdm4a;Kdm5b;Kdm5c;Map3k7;Mcrs1;Meaf6;Men1;Mgea5;Msl3;Myst2;Nat15;Nsd1;Paf1;Pcgf2;Phb;Pkn1;Pole3;Pole4;Prkca;Rbm14;Rnf2;Rnf20;Rps6ka4;Ruvbl1;Ruvbl2;Rybp;Setd2;Setd3;Setd7;Setd8;Smyd2;Taf12;Taf9;Ube2a;Uhrf1;Usp16;Usp3;Wdr5;Wdr61;Wdr82;Whsc1;Yeats4
Module4_mef48	RNA_splicing	5.98882e-06	0.000572731	14143	215	2475	64	1.70101	0610009D07Rik;1110037F02Rik;Cdc5l;Celf1;Ddx39;Ddx46;Ddx47;Dhx38;Frg1;Isy1;Jmjd6;Khsrp;Lsm2;Lsm4;Lsm5;Lsm6;Luc7l3;Magohb;Naa38;Ncbp1;Phf5a;Plrg1;Pnn;Ppie;Ppil1;Ppp1r8;Ppp4r2;Prmt5;Prpf31;Prpf38a;Prpf38b;Prpf6;Rbm22;Rbm25;Rbm28;Rbm5;Rbmxl1;Rod1;Rsrc1;Scaf11;Scaf8;Sf3a1;Sf3a2;Sf3a3;Skiv2l2;Slu7;Smn1;Smndc1;Snrnp200;Snrnp27;Snrnp40;Snrpa1;Snrpb2;Srpk1;Srpk2;Syf2;U2af1l4;Usp39;Wbp11;Xab2;Ythdc1;Zcrb1;…
Module4_mef48	covalent_chromatin_modification	6.29874e-06	0.000582939	14143	224	2475	66	1.68369	Actl6a;Ash2l;Atxn7l3;Bap1;Baz1b;Bmi1;Brd4;Ccnb1;Ctr9;Cxxc1;Dpy30;Dr1;Eny2;Ep400;Hat1;Hcfc1;Hdac5;Hmga2;Ing4;Jmjd6;Kat2a;Kat5;Kdm1a;Kdm2a;Kdm4a;Kdm5b;Kdm5c;Map3k7;Mcrs1;Meaf6;Men1;Mgea5;Msl3;Myst2;Nat15;Nsd1;Paf1;Pcgf2;Phb;Pkn1;Pole3;Pole4;Prkca;Rbm14;Rnf2;Rnf20;Rps6ka4;Ruvbl1;Ruvbl2;Rybp;Setd2;Setd3;Setd7;Setd8;Smyd2;Taf12;Taf9;Ube2a;Uhrf1;Usp16;Usp3;Wdr5;Wdr61;Wdr82;Whsc1;Yeats4
Module4_mef48	regulation_of_metabolic_process	6.76633e-06	0.000606644	14143	3671	2475	730	1.13633	2810002N01Rik;5033414D02Rik;Aarsd1;Aatf;Abhd5;Acadm;Acap2;Acd;Aco1;Acsl5;Actl6a;Acvr1;Adam17;Adam8;Adc;Adcy6;Aebp2;Agfg1;Agrn;Agtr1a;Ahctf1;Aifm1;Aimp2;Akap11;Akirin2;Alkbh3;Alox5ap;Angpt1;Angptl4;Ankrd27;Apba3;Apbb2;Aplp1;Arap1;Arfgap1;Arfgap2;Arfgap3;Arhgef17;Arhgef7;Arid1a;Arl2;Arl2bp;Arnt;Arrb2;Ash2l;Atad1;Atf1;Atf2;Atf6b;Atg4b;Atg5;Atn1;Atxn2;Atxn7l3;Axin1;Azin1;Bad;Bag5;Bak1;Baz1b;Bcl10;Bcl…
Module4_mef48	mRNA_processing	1.10801e-05	0.000963301	14143	281	2475	78	1.58619	0610009D07Rik;1110037F02Rik;Aplp1;Cdc5l;Celf1;Cnot7;Cpsf3;Cpsf6;Ddx39;Ddx46;Ddx47;Dhx38;Fam103a1;Fip1l1;Frg1;Ftsjd2;Hnrpll;Isy1;Jmjd6;Khsrp;Lsm2;Lsm4;Lsm5;Lsm6;Luc7l3;Magohb;Naa38;Ncbp1;Paf1;Papd4;Parn;Phf5a;Plrg1;Pnn;Pop4;Ppie;Ppil1;Ppp1r8;Ppp4r2;Prmt5;Prpf31;Prpf38a;Prpf38b;Prpf6;Rbm22;Rbm25;Rbm26;Rbm28;Rbm5;Rbmxl1;Rod1;Rsrc1;Scaf11;Scaf8;Sf3a1;Sf3a2;Sf3a3;Skiv2l2;Slbp;Slu7;Smn1;Smndc1;Snrnp27;…
Module5_mef48	cellular_process	1.23179e-32	3.31721e-29	14143	8865	1594	1209	1.21004	0610010K14Rik;1500003O03Rik;1500015O10Rik;2700060E02Rik;2700094K13Rik;2810407C02Rik;Aars;Abcf1;Abi1;Acaa1a;Acaa2;Acadl;Acadvl;Acin1;Acly;Aco2;Acot7;Actr2;Adam10;Adam15;Adam9;Add1;Adh5;Adipor1;Adk;Adm;Adprh;Adrm1;Adss;Aff4;Agtr2;Ahcyl1;Aimp1;Aip;Ak1;Ak2;Ak3;Akap12;Akap2;Akr1b3;Akt1s1;Akt2;Aldh18a1;Alyref;Amfr;Anapc1;Anapc11;Anapc13;Anapc2;Anapc4;Anapc5;Angptl2;Antxr1;Anxa3;Anxa7;Ap1s1;Ap2a1;Ap2a2;…
Module5_mef48	localization	8.10967e-22	1.09197e-18	14143	2647	1594	445	1.49162	1500003O03Rik;Actr2;Adam10;Adm;Ahcyl1;Aimp1;Aip;Akap12;Akap2;Akt2;Alyref;Anxa3;Ap1s1;Ap2a1;Ap2a2;Ap2b1;Ap3d1;Ap3s1;Apod;Apoe;Aprt;Aqp1;Arcn1;Arf3;Arf6;Arfip1;Arhgef2;Arid5b;Arl1;Arl3;Arl6ip1;Arl6ip5;Armcx3;Asna1;Asph;Atox1;Atp1b3;Atp2a2;Atp5g1;Atp5j;Atp5j2;Atp5k;Atp5l;Atp6ap1;Atp6v0b;Atp6v0d1;Atp6v0e;Atp6v1e1;Atp6v1f;Atp6v1g1;Atp6v1h;Atp8b2;Axl;B4galt1;Bag6;Bmp4;Bnip3;Bub3;Camk1;Camk2d;Ccdc23;Ccl…
Module5_mef48	electron_transport_chain	7.03222e-21	6.31259e-18	14143	108	1594	51	4.18986	Cyb5;Cyba;Cyc1;Dld;Etfa;Etfb;Fads1;Fads2;Fads3;Mybbp1a;Ndufa1;Ndufa10;Ndufa13;Ndufa2;Ndufa3;Ndufa5;Ndufa6;Ndufa8;Ndufa9;Ndufab1;Ndufb10;Ndufb11;Ndufb2;Ndufb5;Ndufb6;Ndufb7;Ndufb8;Ndufb9;Ndufc1;Ndufc2;Ndufs1;Ndufs2;Ndufs3;Ndufs5;Ndufs6;Ndufs7;Ndufs8;Ndufv1;Ndufv2;Ndufv3;Sdha;Sdhb;Sdhc;Sdhd;Tmx1;Txn2;Txnl1;Uqcr10;Uqcr11;Uqcrc1;Uqcrfs1
Module5_mef48	generation_of_precursor_metabolites_and_energy	9.74415e-20	6.56025e-17	14143	214	1594	74	3.06811	Aco2;Akt2;Bloc1s1;Cs;Cyb5;Cyba;Cyc1;Dld;Dlst;Etfa;Etfb;Fads1;Fads2;Fads3;Fh1;Gaa;Gyg;Idh1;Idh2;Idh3b;Idh3g;Ldhb;Mdh1;Mybbp1a;Ndufa1;Ndufa10;Ndufa13;Ndufa2;Ndufa3;Ndufa5;Ndufa6;Ndufa8;Ndufa9;Ndufab1;Ndufb10;Ndufb11;Ndufb2;Ndufb5;Ndufb6;Ndufb7;Ndufb8;Ndufb9;Ndufc1;Ndufc2;Ndufs1;Ndufs2;Ndufs3;Ndufs5;Ndufs6;Ndufs7;Ndufs8;Ndufv1;Ndufv2;Ndufv3;Pdha1;Pdhb;Pfkl;Ppp1cb;Ppp1cc;Ptges3;Pygb;Sdha;Sdhb;Sdhc;Sd…
Module5_mef48	transport	2.30539e-19	1.23234e-16	14143	2101	1594	363	1.53297	1500003O03Rik;Actr2;Adam10;Adm;Ahcyl1;Aip;Akap12;Akt2;Alyref;Anxa3;Ap1s1;Ap2a1;Ap2a2;Ap2b1;Ap3d1;Ap3s1;Apod;Apoe;Aprt;Aqp1;Arcn1;Arf3;Arf6;Arfip1;Arl1;Arl3;Arl6ip1;Arl6ip5;Asna1;Asph;Atox1;Atp1b3;Atp2a2;Atp5g1;Atp5j;Atp5j2;Atp5k;Atp5l;Atp6ap1;Atp6v0b;Atp6v0d1;Atp6v0e;Atp6v1e1;Atp6v1f;Atp6v1g1;Atp6v1h;Atp8b2;Axl;Bag6;Bnip3;Camk1;Camk2d;Ccdc23;Ccnd1;Cdo1;Chmp1a;Chmp2a;Chmp2b;Chmp3;Chmp4b;Chmp5;Clic…
Module5_mef48	oxidation-reduction_process	2.74565e-19	1.23234e-16	14143	682	1594	157	2.04253	Acaa1a;Acaa2;Acadl;Acadvl;Aco2;Adh5;Adipor1;Akr1b3;Akt2;Aldh18a1;Aldh2;Aldh7a1;Apex1;Asph;Bloc1s1;Cbr2;Cdo1;Cox7a2;Cox7a2l;Cox7b;Cox7c;Cs;Ctbp1;Cyb5;Cyb5r1;Cyba;Cyc1;Cyp1b1;Cyp51;Degs1;Dld;Dlst;Dnajc10;Echs1;Eci2;Etfa;Etfb;Fads1;Fads2;Fads3;Fh1;Fto;Gaa;Glrx3;Glrx5;Glud1;Glyr1;Gpx3;Gpx7;Gpx8;Gsto1;Gyg;Hadh;Hadha;Hibadh;Hmox1;Hmox2;Hsd17b10;Hsd17b12;Idh1;Idh2;Idh3b;Idh3g;Ifi30;Impdh2;Ldhb;Lepre1;Le…
Module5_mef48	metabolic_process	4.72473e-19	1.81767e-16	14143	6288	1594	875	1.23466	1500015O10Rik;2700060E02Rik;Aars;Abcf1;Abhd4;Abi1;Acaa1a;Acaa2;Acadl;Acadvl;Acin1;Acly;Aco2;Acot7;Adam10;Adam15;Adam9;Adamts5;Add1;Adh5;Adipor1;Adk;Adm;Adprh;Adrm1;Adss;Aff4;Ahcyl1;Aip;Ak1;Ak2;Ak3;Akap12;Akap2;Akr1b3;Akt2;Aldh18a1;Aldh2;Aldh7a1;Alyref;Amfr;Anapc1;Anapc11;Anapc13;Anapc2;Anapc4;Anapc5;Apex1;Aph1a;Apod;Apoe;Aprt;Aqp1;Araf;Arf6;Arid5b;Arih1;Arl1;Asna1;Asns;Asnsd1;Asph;Ass1;Atic;Atp1b…
Module5_mef48	establishment_of_localization	6.05191e-19	2.03722e-16	14143	2150	1594	368	1.51867	1500003O03Rik;Actr2;Adam10;Adm;Ahcyl1;Aip;Akap12;Akt2;Alyref;Anxa3;Ap1s1;Ap2a1;Ap2a2;Ap2b1;Ap3d1;Ap3s1;Apod;Apoe;Aprt;Aqp1;Arcn1;Arf3;Arf6;Arfip1;Arhgef2;Arl1;Arl3;Arl6ip1;Arl6ip5;Asna1;Asph;Atox1;Atp1b3;Atp2a2;Atp5g1;Atp5j;Atp5j2;Atp5k;Atp5l;Atp6ap1;Atp6v0b;Atp6v0d1;Atp6v0e;Atp6v1e1;Atp6v1f;Atp6v1g1;Atp6v1h;Atp8b2;Axl;Bag6;Bnip3;Camk1;Camk2d;Ccdc23;Ccnd1;Cdo1;Chmp1a;Chmp2a;Chmp2b;Chmp3;Chmp4b;Ch…
Module5_mef48	cellular_metabolic_process	1.15083e-17	3.44353e-15	14143	5514	1594	779	1.2535	1500015O10Rik;2700060E02Rik;Aars;Abcf1;Abi1;Acaa1a;Acaa2;Acadl;Acadvl;Acin1;Acly;Aco2;Acot7;Adam10;Adam9;Adh5;Adipor1;Adk;Adm;Adprh;Adrm1;Adss;Aff4;Ahcyl1;Aip;Ak1;Ak2;Ak3;Akap12;Akap2;Akr1b3;Akt2;Aldh18a1;Alyref;Amfr;Anapc1;Anapc11;Anapc13;Anapc2;Anapc4;Anapc5;Apex1;Aph1a;Apoe;Aprt;Aqp1;Araf;Arf6;Arid5b;Arih1;Arl1;Asna1;Asns;Asnsd1;Asph;Ass1;Atic;Atp1b3;Atp2a2;Atp5g1;Atp5j;Atp5j2;Atp5k;Atp5l;Atp6…
Module5_mef48	macromolecule_localization	5.12729e-16	1.38078e-13	14143	1145	1594	218	1.68929	1500003O03Rik;Ahcyl1;Aip;Akap12;Akap2;Akt2;Alyref;Ap1s1;Ap2a1;Ap2a2;Ap2b1;Ap3d1;Ap3s1;Apoe;Arcn1;Arf3;Arf6;Arfip1;Arl1;Arl3;Arl6ip1;Armcx3;Atp8b2;Bag6;Bmp4;Bub3;Ccdc23;Cdk1;Chmp1a;Chmp2a;Chmp2b;Chmp3;Chmp4b;Chmp5;Clip3;Cltb;Copb1;Copb2;Cope;Copg;Copz1;Copz2;Ctdnep1;Cuta;Dag1;Derl1;Dlg1;Dnm2;Dynlt1b;Ehd1;Eif4a3;Erbb2ip;Erp29;Exoc4;F2r;Fkbp4;Flot1;Fmr1;Fnta;Frmd6;Fxc1;Gabarapl2;Gdi1;Gipc1;Gosr2;Got…
Module5_mef48	protein_localization	1.12801e-15	2.76156e-13	14143	995	1594	195	1.73886	1500003O03Rik;Ahcyl1;Aip;Akap12;Akap2;Akt2;Ap1s1;Ap2a1;Ap2a2;Ap2b1;Ap3d1;Ap3s1;Apoe;Arcn1;Arf3;Arf6;Arfip1;Arl1;Arl3;Arl6ip1;Armcx3;Bag6;Bmp4;Bub3;Ccdc23;Cdk1;Chmp1a;Chmp2a;Chmp2b;Chmp3;Chmp4b;Chmp5;Clip3;Cltb;Copb1;Copb2;Cope;Copg;Copz1;Copz2;Ctdnep1;Cuta;Dag1;Derl1;Dlg1;Dnm2;Dynlt1b;Ehd1;Erbb2ip;Erp29;Exoc4;F2r;Fkbp4;Flot1;Fnta;Frmd6;Fxc1;Gabarapl2;Gdi1;Gipc1;Gosr2;Gpm6b;Hes1;Hspa4;Ift46;Ipo4;I…
Module5_mef48	protein_transport	1.41572e-15	3.1771e-13	14143	738	1594	156	1.87552	1500003O03Rik;Ahcyl1;Aip;Akap12;Ap1s1;Ap2a1;Ap2a2;Ap2b1;Ap3d1;Ap3s1;Arcn1;Arf3;Arf6;Arfip1;Arl3;Arl6ip1;Ccdc23;Chmp1a;Chmp2a;Chmp2b;Chmp3;Chmp4b;Chmp5;Clip3;Cltb;Copb1;Copb2;Cope;Copg;Copz1;Copz2;Dag1;Derl1;Dnm2;Dynlt1b;Ehd1;Erbb2ip;Erp29;Exoc4;F2r;Fxc1;Gabarapl2;Gdi1;Gipc1;Gosr2;Gpm6b;Hes1;Hspa4;Ift46;Ipo4;Ipo5;Ipo7;Ipo9;Jun;Kdelr3;Klc1;Kpna2;Kpnb1;Lman1;Lman2;M6pr;Macf1;Mapk1;Mapk3;Mcfd2;Mff;Mt…
Module5_mef48	intracellular_transport	3.30528e-15	6.84702e-13	14143	604	1594	134	1.96844	1500003O03Rik;Actr2;Adam10;Ahcyl1;Aip;Akap12;Alyref;Ap1s1;Ap2a1;Ap2a2;Ap2b1;Ap3d1;Ap3s1;Arcn1;Arfip1;Arl1;Arl3;Arl6ip1;Bnip3;Camk1;Chmp3;Chmp5;Cltb;Copb1;Copb2;Cope;Copg;Copz1;Cul3;Dag1;Derl1;Dynlt1b;Ehd1;Ehd2;Enah;Erbb2ip;Ergic1;Exoc4;F2r;Fxc1;Gabarapl2;Gipc1;Golga7;Hes1;Hif1a;Hspa4;Ift46;Ipo4;Ipo5;Ipo7;Ipo9;Jun;Kif1c;Kif5b;Klc1;Kpna2;Kpnb1;Lman1;M6pr;Macf1;Mapk1;Mapk3;Mff;Mtx2;Mybbp1a;Napa;Ndel…
Module5_mef48	catabolic_process	3.83682e-15	7.38039e-13	14143	1096	1594	208	1.68386	1500015O10Rik;Abhd4;Acaa1a;Acaa2;Acadl;Acadvl;Aco2;Acot7;Adh5;Adss;Amfr;Anapc2;Anapc4;Aph1a;Apoe;Arf6;Arih1;Arl1;Asna1;Atp2a2;Atp5j;Atp5j2;Atp5k;Atp5l;Atp6v0b;Atp6v0d1;Atp6v1g1;Bag6;Bckdk;Becn1;Bnip3;Cast;Cd44;Cdc26;Cdc34;Cdkn2a;Cdo1;Comt;Cs;Cul1;Cul3;Cul7;Dap;Ddah2;Derl1;Dlst;Dnajc10;Dpysl3;Ece1;Echs1;Eci2;Ei24;Eif4a3;Erlec1;Etf1;Fh1;Fis1;Gaa;Gls;Glud1;Glyr1;Gna12;Gnai3;Gns;Got2;Gpc1;Gpx3;Gspt1;…
[truncated: 740 more rows]

## Sheet: Reprogramming (Roy & Sridharan)
Module_CellLine	Term	p-value	q-value	#Genes	#Term	#Module	#hits	ratio	Genes
[truncated: 995 more rows]

## Sheet: dedifferentiation (Seirup et al
Module_CellLine	Term	p-value	q-value	#Genes	#Term	#Module	#hits	ratio	Genes
[truncated: 9,440 more rows]

## Sheet: lineage specification (Xie et a
Module_CellLine	Term	p-value	q-value	#Genes	#Term	#Module	#hits	ratio	Genes
[truncated: 2,718 more rows]
