# Supplementary material for: Dynamic regulatory module networks for inference of cell type–specific transcriptional networks
Source: HighWire-hosted journal article supplement (doi:10.1101/gr.276542.121), 2022-06-15
Supplement: Supplemental_Table_S3.xlsx [file Supplemental_Table_S3.xlsx]

## Sheet: Caption
Supplemental Table S3. List of genes that change module across cell lines, states or time points. Each sheet corresponds to one data set.

## Sheet: LEGEND
Each sheet correspond to a dataset.
Each row correspond to a transitioning gene set.
First column is the name of the gene set, second column is the list of genes in the gene set (separated by #).

## Sheet: Reprogramming (Chronis et al.)
Cluster77	0610040B10Rik#9430037G07Rik#Hist1h4m#Aoc2#Nlgn3#B230217O12Rik#Zbtb7c#Heatr7b1#Cml3#Tnfsf13#Tbc1d4#Rpl22-ps1#2810442I21Rik#C030013D06Rik#Gm13889#Gm5901#Ttll13#Fabp7#Spag4#Slc7a4#Ppm1k#Dmrta2#1700028J19Rik#1700048O20Rik#Adrb2#Gdf15#Gm15696#Tspan15#snoU89#Fam63a#Slc45a3#Slc18a2#Rph3al#Rem2#Nppc#Darc#2310014L17Rik#4930581F22Rik#Cdh8#Gm16601#Tspan32#Entpd3#Sbsn#E2f2#Scarna10#SNORA66#Pkp1#2810030E01Rik…
Cluster78	1110002J07Rik#Padi3#Efcab10#Slc5a11#Fam83g#Zp3#Zscan4e#Gm20533#Gdap1l1#Bcas1#4930444M15Rik#Cpne9#Lce1g#Pdyn#Phox2a#Smc1b#Sp5#3830417A13Rik#Zyg11a#Gm5634#Gipc2#Bnipl#Igsf21#Il17b#2410012M07Rik#Jakmip1#Cplx1#4930526A20Rik#Bcl6b#Gm1070#Gm2104#Zscan4f#Zscan4c#Slc5a5#Slc44a4#Patl2#Apobec2#4930544I03Rik#4933402E13Rik#C330002G04Rik#Gm12203#Gm6846#Zscan4-ps2#Zfp459#Sh2d4b#Sema5b#Nrxn2#Nphs1as#4933437F05R…
Cluster79	9930013L23Rik#Itga11#Lcp1#Lgals3bp#Loxl3#Lpp#Lxn#Masp1#Antxr1#Npr2#Elk3#Vasn#Cmtm3#Gulp1#Hs6st2#Col4a5#Cdon#Fcgrt#Filip1l#Gm15542#Tgfb2#Tgfb1i1#Pdp1#Pdgfrl#Gpr124#Fndc1#Gm17446#Wisp1#Fam114a1#Rgs3#Prss35#Gm5537#Fndc3b#Gm6136#Vcam1#Fam101b#Ppap2b#Plxdc2#Gm7666#Fzd2#Vgll3#Zcchc24#Fam198b#Tcf4#Tbx15#Scarf2#Sap18#Lats2#Creb3l1#Sorcs2#Sorbs3#Sned1#Slit2#Sirpa#Efemp1#Shisa4#Sgce#Mfap5#Mdfic#Rhoj#Armcx3…
Cluster80	1110020A21Rik#Igll1#Cml2#Itgb1bp2#Ak7#1700019A02Rik#Gm12186#Tmem45b#Atcay#Lor#Alox15#Trav13-3#3110043A19Rik#Gm10010#Trpm1#Atp8b3#Mfsd7c#Cyp27b1#Tulp1#B020031M17Rik#Fhl4#B4galnt2#Vpreb3#Unc45b#B230325K18Rik#Nrxn1#Nova2#Icam4#Chit1#Hist1h4k#Papolb#Dgki#Has3#Ccdc38#Gpx6#Ppm1e#Ppef2#Gm9947#C330006D17Rik#Gm8264#Rab37#RP24-97C18.3.1#Gm6457#BC046401#Gm5286#Robo4#Rln1#Gm3239#Acbd7#Gm20394#Sept12#Scn8a#Gm…
Cluster81	1700034P13Rik#Il17d#Il34#Il15ra#Ikbke#Ypel2#Xylt1#Gm15417#Adcy2#Fam55d#Zhx3#Zxdb#2010012O05Rik#Insc#Inha#4933431E20Rik#Gpr161#Lypd1#Amigo1#5031425E22Rik#Gm5874#Nrarp#Nr4a2#Zkscan1#Atp12a#Gm15879#Psd3#Dnase1l1#Zfp939#Atp7a#Gdf11#Samd9l#2810432L12Rik#Gpr162#Flrt3#St8sia2#Sp110#Gm17630#C2cd2#Zfp672#Zfp316#Gm16001#AL645907.1#Vat1l#Ust#Gm12942#5430435G22Rik#H2-M3#Lrrn4cl#Lmx1b#5730508B09Rik#Gm5900#Nat…
Cluster82	1110008L16Rik#Ipo11#Jph1#Homez#Cmtm8#Gm9828#Ceacam1#Srcrb4d#Spock2#Gm527#Ccdc84#Tfap2a#Tex15#Gm20498#Cacnb1#Trpv4#Elovl4#Gm17096#C030048B08Rik#Zbtb9#Zbtb48#Gm15344#BC053749#Zfp382#Zfp72#Far2#Gm14308#Acn9#Zfp329#Esrp2#Gm13123#AW554918#Zfp58#Exog#Gm12276#AI467606#Zfp184#4632415L05Rik#Gm11331#8430406I07Rik#Zfp770#Fam116b#Gm10279#4930547N16Rik#Zfp760#B230206F22Rik#Gm10116#2310079F23Rik#B3gntl1#Zfp764…
Cluster83	0610007N19Rik#Cmya5#Iigp1#Itgb8#Ahrr#Tnfaip8l3#Fam119b#Gm14686#Larp6#Lair1#1500002C15Rik#Tfec#Evx2#Gm16908#Cftr#Ppp1r3d#AC120540.1#AC158995.1#Hoxb2#mt-Tr#AC158665.1#Gm3625#Fcgr4#4930577N17Rik#Snora78#Asxl3#Gm8935#Galnt5#Myoc#2700069I18Rik#Snord35b#AC131761.1#Havcr2#Gm10985#BX323066.1#Scrg1#Scn7a#Tmem169#AC152058.1#Gm14232#Lingo2#Lgi4#1700029I15Rik#Susd3#Evi2b#Gm17329#Cilp#Pde7b#Ar#Snord91a#AC1329…
Cluster84	1500002O10Rik#Cnfn#Isl2.1#Itpa-ps1#1700069B07Rik#Gm16799#Gkn1#Ccdc69#AL662835.1#Otx1#Otol1#Rpl36-ps10#Rorc#Tmigd1#AC132444.2#Fam159b#Wif1#Vmn2r121#4632428C04Rik#Gm7970#Gm13193#Fbxl13#Btn1a1#1700024N20Rik#Pom121l2#AC118255.1#Six3#Serpinb7#Tyr#AC133103.3#Il15#Gm2308#Gm10552#Ces2e#Adamts13#1700031A10Rik#Prr22#Proz#Spaca4#Snora23#Ucn3#Epha6#Hgfac#Gm17455#Gm10045#Cldn24#Kcnmb2#Kcne2#2310002J15Rik#Prox…
Cluster85	A930001N09Rik#Msl3l2#Ap3m2#Pknox2#Plekha4#Psd4#Ptgs1#Rab3b#Dysf#Sema4g#Efcab4a#Sertad3#Efna2#Slpi#Efna4#Stard8#Gm5665#Fkbp1b#Mum1l1#Nkd2#Fgf2#Cobll1#Gm9008#Fbxl16#Cd84#Fbxl12#Gm17143#Gm15249#Ccdc46#Endod1#Trf#BC028528#Zfp937#Usp35#Eps8l2#Vegfc#Ccdc3#Stat2#Tiam2#Bend5#Repin1#Rnf135#Bcar3#Nnat#Notch1#Bahcc1#Kif1a#Klf12#Adamts14#Ccdc112#Clcf1#Gli2#Gm13166#Gm3209#Fam161a#Zfp52#Zfp286#Fam69a#Fam115c#Z…
Cluster86	A4galt#Il1rl1#Ctsk#Lpar1#Fam13c#Tnfrsf11b#Srpx2#Gm9531#Igfbp6#Il13ra1#Gm2115#Sertad4#Plekhh2#Phyhd1#Anpep
Cluster87	1700061G19Rik#Gyltl1b#Accsl#Camsap3#Bai1#Capsl#Cecr2#Lad1#Amph#Ckmt1#Pou3f1#Pnma5#Cldn3#Rps6kl1#Dtx1#Clgn#Trim71#Elf3#Tjp3#Sult6b1#Zfp819#AC147634.1#Fam25c#Zmat4#Zfp473#B4galnt3#Gpx2#Gm2381#Gm14820#Gm15887#Gbx2#Clstn3#Ggt1#Gm514#Ttpa#Etnk2#Spnb4#Sox15#Snai3#Slc39a4#Kndc1#Csn3#Slc29a4#Slc27a2#Piwil2#Pdcl2#Rims3#Rhpn2#Qprt#Ptch2#Pramef12#1810019J16Rik#Pnldc1#Plekhb1#Pacsin1#Ovol2#Nlrp4f#Ddx43#Nhedc…
Cluster88	1110001A16Rik#Zfp280c#Fam122b#Cwc27#1110034A24Rik#Esco1#Zcchc4#Txlng#Txnrd3#Tcea2#Tchp#Slc7a7#Smcr7l#9430015G10Rik#Ikzf5#Kri1#9930104L06Rik#1110005A03Rik#Hspa4l#Gstcd#Gm7701#Gm3435#Gm16344#Gm129#Gfm2#Flad1#Cep78#Ccdc76#C230052I12Rik#Adat2#AI846148#Iqgap3#2610002I17Rik#1110020G09Rik#Mettl22#Mettl21d#Nanp#Naa40#Oip5#Nutf2#Pigo#Pigf#Prss36#Prpf4#Rdh13#Rbmx2#Senp1#Scly#Slc35a3#Slc30a1#Taco1#Syk#Traf2…
Cluster89	1110012J17Rik#Cnnm3#Inhbb#Hvcn1#Cnih2#Acad11#Bud13#Cep97#Frmd5#Gm13248#Gm20469#Hemk1#Zfp951#Fam118a#Fastkd1#Zfp955b#Zswim4#BC024479#Tbc1d25#Stk10#Rpusd3#Armc8#Pyroxd1#Prmt10#Nod1#Dcbld1#Klc3#Cry2#1500009L16Rik#1700052N19Rik#Actr3b#Cacna1a#Fbxo2#Gm14399#Gm2897#Hmg1l1#Hook2#BC032203#Lrrcc1#Zswim1#BC024978#Spata7#Efs#Slx1b#Sema4b#Poli#Arhgap12#Olfr613#Ofd1#Irak2#Crocc#2310047B19Rik#2410018L13Rik#BC0…
Cluster90	Adamtsl3#Il1r1#Lilrb4#Lphn3#Csf1r#Gm11175#Igsf10#Trem2#Arsi#Pf4#Osr1#Olfml3#Msr1
Cluster91	1700019G06Rik#Gm9786#Agtr2#mt-Tn#mt-Tl1#CAAA01205117.1.15042.1#Rspo2#Eif3s6-ps2#Gm10181#Rpl35a-ps3#Pdgfra#Gm10193#Gm10240#Gm11966#Gm12471#Gm12751#Gm13370#Gm7808#Gm14287#mt-Tg#Zcchc5#Gm15148#Mir686#Mir5102#Gm17510#Gm20388#Gm20430#Gm2423#Gm8420#Gm8822#Gm9790#Rpl36a-ps3#Rpl35a-ps4#Gxylt2#Cxcl15#Gm9761#Col8a2
Cluster92	0610005C13Rik#1110002L01Rik#Zfp558#Harbi1#Gm15421#Fgfr3#Ccdc138#Ccdc106#C630004H02Rik#Neurl1a#Nhedc2#R74862#RP23-406N5.8.1#Syt5#Tagln3#Igfbpl1#Gm17381#Gdap10#Camkk1#C030039L03Rik#Brip1#Lig4#Lipe#Pdik1l#Pdlim3#Spag1#Spic#Atxn3.1#Zfp69#Gnat2#Gm14387#Fbxo27#Bbs1#Bai2#2610015P09Rik#Jmjd1c#Nhs#Nmb#Dpysl4#Rbks#Tbc1d9#Tex9#Fam169b#Zfp780b#Zfp839#Fam184a#Gm5796#Gm11457#Cdkl5#Agpat9#Afap1l1#4933403G14Rik#…
Cluster93	0610009L18Rik#Hoxc9#Ifih1#Cntnap1#1700019L03Rik#Gcom1#Gm6377#Trpm3#AC147101.1#Selp#2900005J15Rik#Optc#Oas1b#Gm8129#1700029J11Rik#Cd46#Gm10497#Gpr123#Sybu#3110007F17Rik#Rps19-ps4#AC124489.1#Mycbpap#2700033N17Rik#Hcn1#8430408G22Rik#Cldn22#Gm14059#Hoxc4#Stac#Eif2c4#Ppp1r3b#AC122247.1#Lect1#A330032B11Rik#2310001H17Rik#Bhmt2#Frmd3#Gm4876#Fam65b#Xdh#Wfdc1#B930094E09Rik#Serpina3h#SNORA62#Npff#Aox1#Gpr18…
Cluster94	1500015O10Rik#Lrrc17#Islr#Il1rn#6330406I15Rik#Adamts5#Gm10182#Igfbp5#Slit3#Sema3f#Adm#Bicc1#C1qa#Gm13509#Tmem119#Svep1#C1qb#C1qc#C1qtnf3#Ccl12#Gpm6b#Capn6#Prelp#Podn#Casp12#Clec11a#Fcer1g#Srpx#Sod3#Rspo3#Rpl30-ps8#Fcrls#Gm10012#Gm10221#Gm11361#Gm12669#Gm13597#Plat#Palmd#P4ha3#Npr3#Mrc1#Cyp1b1#Mmp23#Cxcl1#Megf6#Matn2
Cluster95	1110021L09Rik#Ahr#Igsf3#Klf11#9830001H06Rik#Gnb4#5730455P16Rik#Fut10#Hmg20a#Sipa1#Ecscr#Mkx#Mfsd11#Zfp592#Fam122a#Cachd1#Gm16515#BC024659#Zdhhc1#Ano8#1110059G10Rik#Plekhm2#Pld2#Gng11#4930402H24Rik#Foxk1#Homer1#Sirt4#Siae#Mecp2#A730011L01Rik#Zdhhc18#Fam113a#Casd1#Gm17684#Uggt2#Ubn1#Pex13#Pdk2#Gpr176#AI848100#Gm10033#Zfp395#Fam120b#Rnf139#Arl16#L3mbtl3#Klhl26#1110032A03Rik#Cfp#Golga1#Stk39#Stat1#My…
Cluster96	1700001C19Rik#Rgs22#Gm11185#Rgs9bp#Rhox13#Mapk8ip2#March11#Duox1#Rims4#Clca4#Duxbl#Rxrg#Nrg2#Nrn1l#Gm2075#2310042E22Rik#Gm13663#Scn3a#Sct#Gm10332#Slc2a5#Slc2a7#A730036I17Rik#Mep1b#Slc30a3#Slc34a3#Chst8#Slc38a3#Slc7a9#Nrsn1#Nxf7#Gm8332#Acaa1b#Gm17244#Sgk2#Siglec5#Gm13080#1700024J04Rik#Cpne7#Klhdc9#Efhc2#Slco4c1#Fgf8#Asb16#Snap25#A930024E05Rik#Myh13#Sp8#Spag6#Ccdc64b#Spef2#Spink10#Pga5#Pgc#Gm6723#A…
Cluster97	0610009E02Rik#Cntn2#Ildr2#Il17re#Cnnm1#B3gnt8#Trim34b#Tulp2#4732415M23Rik#Lonrf2#Crispld1#1700026L06Rik#Gm17582#Prr5l#Podnl1#Fam196b#Txlnb#U4#BC013712#Fgf10#Tac1#Sytl5#Gm16201#Acss1#Trim66#AC141881.2#Klhdc7a#Cpa2#2410004P03Rik#Gm17633#Pdk4#Dmp1#Tnfrsf13b#3222401L13Rik#Fgf21#Slitrk6#AC127575.1#Gm20425#BC100451#Fam78b#Wnt4#Zfp300#AC156032.1#Kng1#Kcns1#4930486L24Rik#Gm7879#Pax8#Dennd1c#9130204K15Rik…
Cluster98	Aff1#Cnnm2#Gm3591#Gstk1#Amot#Lrch2#Dact1#Cc2d1a#Gm15443#Pdgfc#Pcnx#Ccdc136#Gm15610#Pias1#Pgpep1#Zfp655#Exoc6b#Tcea3#Stoml1#Steap2#Snta1#Snn#Slc9a3r2#Sik1#Rilpl1#Plekhg5#Dnajb5#Rbp1#Rbm43#Plekha2#Arfgef2#Notch3#Dennd2a#Mtmr4#Ddhd2#Kctd2#D8Ertd82e#Hs1bp3#Ankmy2#Gmpr#Ctns
Cluster99	A430107O13Rik#Irx1#Alox5ap#Itih2#Csgalnact1#Layn#Adam12#Hoxa11as#Agtr1a#Fyb#Rbms3#Ptprd#Fam20a#Zfp521#Tyrobp#B3gnt9-ps#Fzd1#Rcan2#Rbp4#Tmem86a#Eya4#Fzd4#Ptplad2#Dnm3os#Tenc1#Zfp503#Fat4#Fzd8#Pon3#Arhgap24#Tgfbr3#Emr1#Gfra1#Podxl2#Plek#Sspn#Emilin2#Gjb2#Pik3r1#Pcp4l1#Stab1#Sorbs2#Gm20459#Pcdh7#Pcdh18#Snai1#Slc8a1#Gm4604#Parp3#Pappa#Slc7a2#Edil3#Gm5940#Osr2#Olfml2b#Slc1a6#Serpina3g#Gm9892#Olfml1#Ns…
Cluster100	Dkk2#Rpl35a-ps6#Gm4204#Gm13736#Igf1#Itgbl1#Gm13092
Cluster101	6030419C18Rik#Igf1r#Igdcc4#AI597468#Unc93b1#Enpp5#Gm2a#Cacna2d1#Smad3#Slc16a2#Hspb6#Fkbp14#Pkd1#Dnm1#Ulk2#Atrnl1#Gm14165#Mtss1l#Mtap2#Adam8#Gria3#Fosl2#Adc#Ttc28#Tsc22d2#Gm14166#Bcl9l#Ston1#Steap3#Habp4#Galnt10#Pla2g15#Arhgap23#Tnrc18#Tnfaip2#Gm6206#Mkl1#Cx3cl1#Adcy6#Ids#Galntl4#Afap1#Tmem167#Tmem150a#Gm8113#Ccdc102a#Sesn3#Ebf1#Ifngr2#Ggcx#Osbpl5#Apbb2#Blcap#Ier5#Cdk14#Bmpr2#Tead3#Tbc1d2b#Ier5l#C…
Cluster102	2200002D01Rik#Itpripl1#Kdsr#Inpp1#Immp2l#Abhd10#Tusc1#Ttc39c#Ado#Cdk6#Pitpnm2#2810001G20Rik#Baiap2l1#Gm9581#Cd59b#C030006K11Rik#Tmem229b#Tirap#C85492#Frat2#Oas1a#Nmi#Ccdc141#Gnb1l#Gchfr#Gsdmd#Them4#Sowahc#H2-DMb1#Hdac10#Hist2h2aa1#Hist2h2aa2#Il2rg#Zfp282#Zfp180#Fam195a#Slc37a4#Asb1#Sh3bp2#Dzip1l#Rgmb#Qpct#Nhlrc2#Neil3#Myo1g#Mpped2#Mboat1#Cpm
Cluster103	0610012G03Rik#Rala#Zfyve21#2010106G01Rik#Tnfaip8#Tnfrsf10b#Rhobtb3#Rhod#4931406C07Rik#Jag1#Jmjd8#Fbxw9#Errfi1#Ubr3#Il17rc#BC013529#Zhx1#Zkscan3#BC017643#Sh2b1#Sh3kbp1#1110057K04Rik#Unc5b#Smoc1#Smurf2#2310021P13Rik#Coro1a#Itsn1#Gba#Gpr137b#4732418C07Rik#Zfp260#Zfp266#Fam20b#Sec16a#Sec22a#Dcaf6#Nktr#Ccdc6#Gpr108#Heatr5a#Trim41#Trim8#Dpp8#Rab21#Abcc5#Clip1#Gpr107#Auh#Uckl1#Egln1#Spag9#2210403K04Rik#…
Cluster104	6030405A18Rik#Klk1b27#9330188P03Rik#Gm13192#Abp1#Chst13#Clec2g#Gm4477#Gm8267#Gsta1#Hbb-y#Vmn1r-ps32#Slc6a12#Serpinb3a#AC125484.1#Phox2b#Ly6i
Cluster105	1110018J18Rik#Ip6k2#Irx2#Ilvbl#9430020K01Rik#Tpra1#Tob1#Tmem164#Thbs3#St6galnac6#Speg#Tsc22d3#3830406C13Rik#Fam189b#Zdhhc20#Ubtd1#Fam149a#Fam171a2#Vopp1#Zfp148#BC029722#Fam89b#Zdhhc9#Zeb1#Fam3a#Slc35a2#Egfr#Slc35f5#Egfl6#5930434B04Rik#Slc1a4#Sgpp1#Acp2#Hipk3#Acvr1#Grik5#Adamts10#Gnb5#C1qtnf1#H6pd#Ccdc47#Rsph3b#Rhog#Cd302#Reep3#Dram2#Cebpb#Prkca#Pdzrn3#Cflar#Chpf2#Glt8d1#Nab1#Dhdds#Gm14005#Naglu#D…
Cluster106	1110028C15Rik#Fam190a#Zfp449#Grk4#Prickle3#Vps37d#Gm3906#Pcdhb20#Tnnt3#Gm20457#Nfatc1#Sytl2#Gm11613#Mlkl#Spon2#Fv1#Lmo1#Serpinb6b#Fam105a#Irx5#Rnf122#Dnalc1#Hivep3#Ptpn7#Cpz#Gprc5b#Plxnd1#Cdh17#Gm3150#Pcdha5#C4b#Gm1840#Nhsl2#Arsj#Gm17241#Mpp2#Adcy7#Glrb#Mamdc2#AC159379.1#Fbxo32#L1cam#4932415G12Rik#En1#Il6#C1qtnf2#Gm15725#Fam131a#Was#Zfp119a#Fam124a#Nxph4#Gm16882#Calhm2#Pcdh9#Gm17709#Ccdc157#Phf1#…
Cluster107	2900097C17Rik#Tlr13#Gucy1a3#Gm12196#Ccr1#AC164649.1#AC159897.1#AC132271.1#Tbx5#Ifit1#Gm15625#Clec12a#Aif1#Il21r#Il1rl2#Col28a1#AC159378.1#Mir3074-1#AC108434.1#Prr16#Dnm3#Lilrb3#Kcne4#AC165279.1#CAAA01010581.1.5350.1#Gm10355#Gm9987#Sox9#Snord69#Ptprc#Dock10#Gm16550#AC165289.1#CAAA01185882.1.53235.1#Gm10982#Gpr88#Snord65#Snord47#Pik3cg#AC122209.1#Gm17420#AC166252.1#Ccr5#Gm13372#Hk3#Snord16a#AC13159…
Cluster108	2610018G03Rik#Mirg#Itga9#Inpp5d#4930583H14Rik#Plvap#Pitx2#Gm10576#Gm11027#Gm12906#Gm13212#Gm14419#Gm6871#Icam1#Sema7a#Tmem8#Fam19a5#Rpl39l#AC139376.1#Npl#Mmp9
Cluster109	1110058L19Rik#Zfp125#Wdr45#Gm4459#Gm14420#Gm13502#Gm10704#Gigyf2#Bcar1#Clpx#Hbegf#1700020I14Rik#Vegfb#Utrn#Uba5#Tspan6#Triobp#Tcf7l1#Smtn#Arrdc4#Pbx2#Dlc1#Mgrn1#Kifap3
Cluster110	Alg13#Gm9797#Fbxo5#Cobl#BC048355#Tubb3#Etv4#Cdca7#Cdt1#Cenpv#Cmah#Syce2#Tuba4a#Fam60a#Spint2#Snrpn#Slc7a3#Sfn#Sap30#E130012A19Rik#Perp#Dok2#Mybl2#Mcm10#Itpk1#Ctnnal1
Cluster111	2210011C24Rik#Iqcg#Irf6#Liph#Aim1l#Fgf15#Zdhhc23#Fads6#Gm10391#4930519F16Rik#Gm13580#Sprr2a2#Spata22#Gm17644#BC057022#Gnmt#Phf21b#Dkkl1#4930548H24Rik#Chd5#Fam178b#Zfp345#Zfp418#4732444A12Rik#Gjb1#Bmp8b#Gm14409#Slc25a31#Shisa7#Gm4984#C330021F23Rik#Hesx1#Nudt10#Nfasc#Camkv#Gm10718#Tmem79#En2#Gm14416#Casz1#Gm8909#Pnma2#Pmel#Catsperg1#Chrna9#Xist#Etv2#Gm11008#Ccdc36#Gm20486#RP23-312H15.9.1#Dock3#Ccdc…
Cluster112	6330512M04Rik#Ldb2#Maob#Irf8#Irf5#Fgf5#Ror1#Robo2#AC160635.1#Galnt9#Rgl3#AC122537.1#AC165159.1#Cacna1h#Rrad#Emx2#AL627204.1#Bhlhe22#Tril#Vav1#Fam150a#Ccl8#Cd300lf#Tmem178#Fam101a#Gm10226#Gm10780#Snora73b#Avpr1a#Gm15639#Gm6685#Gm7236#Gm9840#Slfn2#AC147549.1#Selplg#Extl1#Pik3ap1#Dock2#Pgr#Arhgap30#Palm2#Oasl2#ORF63#Nog#Mrpl48-ps#D630003M21Rik#Ms4a4d#Cysltr1#Kcnk2#Cpa4
Cluster113	AF085738#Lum#Mfap4#Gm9385#Col11a1#Clec3b#Fbn2#Fmod#Gm11518#Gm12715#Gm15450#Gm3788#Gm9493#Rpl38-ps2#Eln#Ogn#Aspn#Nov#Dcn#Mfap2#Cxcl5
Cluster114	9330182L06Rik#Gm9888#Acpp#Cadm3#Vax2#Avil#Tox3#Tmprss5#Slc7a11#Efcab1#Rgs8#Drp2#RP23-152I2.1.1#Plekha6#Pbp2#Ctnnd2#Mansc1#A630001G21Rik#Krt14#Klrg2
Cluster116	Col16a1#Col2a1#Nuak1#Lsp1#Vcan#Smoc2#Rin2#Pla2g4a
Cluster117	2610019F03Rik#Kcnk1#Lef1#Lin9#Lipt2#Lmtk3#Cyfip2#Mpv17l#D6Mm5e#N4bp3#Dedd2#Orc1#Dhdh#Phf16#Pnp2#Prkcz#Psma8#Rab11fip1#Dpf1#Rab27a#Ralgps2#Ranbp17#Rpgr#Rundc3a#Sema4d#Setmar#Hist1h2ad#Gm4723#Gm17296#Gm17167#Hic2#Gm16973#Ska1#Slc43a1#Gm11353#Ninl#Notum#Gm10749#Chmp4c#Gm10257#Gm15710#Helq#Slc4a11#Slc5a6#Atad5#Stk30#Chd7#Phf19#Pik3cb#Ccdc77#Card10#Gga3#Gm15590#Gm9027#Eme1#Tmem191c#4930566F21Rik#Intu#…
Cluster118	Btg2#Col6a1#Itm2a#Gm15501#Col4a2#Cdh11#Zfp36#Il6st#Fbn1#Wls#Serpine2#Sepp1#Rpl17-ps5#Mmp2#Dab2#Marcks#Ltbp3#Lrp1#Colec12
Cluster119	Cd248#Col6a3#Penk#Gm8203#Col6a2#Gm13394#Gm15772#Tgfbi#Wisp2#Fbln5#Rps2-ps10#Emilin1#Rpl17-ps3#Prrx1#Pmp22#Dkk3
Cluster120	1600029D21Rik#Prkcc#Gm16216#Gm12583#Gm12005#Rnf208#Rtn1#Gm11496#Gm10800#Gm10778#Sall3#Sec1#Gm10482#Shisa6#Slc13a5#Glod5#Grhl1#Foxi3#Hist3h2ba#Fmn2#Hist1h3h#Celsr1#Atg9b#Slc37a1#Cd164l2#Esx1#Slc6a15#AI661453#Esyt3#Spna1#4933427G23Rik#2010107G12Rik#Upk1a#Tcstv3#4833407H14Rik#9330159F19Rik#Kcnk5#2410019O14Rik#2410137M14Rik#Fam89a#Tex21#Syt7#2010012P19Rik#Plek2#Pla2g4c#Pip5k1b#Ddx25#Ocln#Nrgn#Notch4#…
Cluster121	0610040B09Rik#Hand2#Clec4a1#1700047G07Rik#C030014I23Rik#Cd180#Cd36#Gm10071#Gm10401#Gm12002#Gm15181#Gm17201#Gm6264#Gm684#Gm8741#Gm9396#Gm9851#Gp1bb#Upk1b#Tox#Tnf#Stc1#Sox6#Snora68#Siglec1#AC127366.1#SNORA18#SCARNA17#Rnasel#Rab40b#Pparg#Pcdhb16#Mef2c#Cys1#Irf7#Cybrd1
Cluster123	AC132606.1#Mir762#AL954710.1#Epha3#Scarna9#AL844840.1#Erg#mt-Ta#Comp#Kctd12#Maf#Lgr5#AL670236.2#Fxyd1#Gm10171#Gm10241#Gm10491#Gm12112#Gm12895#Gm12896#Gm13072#Gm14519#Gm14536#Gm15027#Gm15536#Gm5616#Gm7488#Gm8325#Gm9769#Gm9770#Gp49a#Hmcn1
Cluster124	1200016B10Rik#Klk8#Lama1#Kif5c#Cox7a1#Gm10330#Gm9631#Sorl1#Tmem40#B3gnt5#Rpl14-ps1#Arid3b#4933427J07Rik#Aard#Acacb#Fndc3c1#Gm17699#Smtnl2#Espn#Sept3#1700001L05Rik#Actn3#Btbd11#Camk2b#Galnt6#Gm16096#Caps2#Sec14l2#Sap25#Gbp2#Gm11249#Gm12480#Gm12588#Gm6724#Gm12688#Rasgrp4#Dpysl5#Gm14401#Gm14406#Gm14411#Gm14412#Gna15#Gstm6#H2-M5#Hal#Igsf9#Six4#Atp1a3#Rasip1#Arhgap8#Ppp2r2c#Dnd1#Pls1#Pard6b#Nr6a1#AA46…
Cluster125	Alcam#Mical2#Odz3#Ephb2#Cdh3#Gm6166#Gng2
Cluster127	1700024B05Rik#Krt12#Krt6b#Mall#Cyp4f39#Gm7247#Zfp536#Vax2os2#Aadat#Abcc12#Bmx#Gm14149#Vax2os1#Tspan8#C330008G21Rik#Gm11128#Gm16761#Gm3129#Tph1#Tnfrsf8#Gm4419#Gm5054#Gm6569#Gm807#Gm9732#Grm4#Hist2h3c1.1#Klk1b22#Tbx20#Stk32a#Slc7a14#Arpp21#Scgb3a1#Rnase1#Rab17#Ppp1r14c#Pla2g4d#Dmrtc2#Pcsk1#Dmkn#Oit1#Napsa
Cluster129	4831426I19Rik#Ube2l6#Zeb2#Fas#Gm20431#Adamtsl1#Fut11#Fahd2a#Tshz1#Foxj2#6720456H20Rik#Hivep2#Hspa12b#5430417L22Rik#C1rl#Cbx4#H2-T23#Tbx4#Syne1#Cdkn2c#Chst7#Hic1#Tram2#Ephb6#Tmem203#Eno2#Tbc1d8b#Eml1#Slc36a4#Sgsh#Serpinb9#Sema3b#Scara5#Samd14#Rgs2#Rassf8#Ptprm#Dpysl2#Plce1#Paqr7#Pak3#Ntn4#Msx1#Ankrd29#Mid2#A830007P12Rik#Lynx1#Ctso#Lrrk1#Crtc3
Cluster130	1110032F04Rik#Kpna7#Otop1#Mst1#5830416P10Rik#Ceacam10#Gcnt3#Gipr#Ush1c#R3hdml
Cluster131	Apln#Nell2#Rarres2#Tnmd#Gm14440#Gm10774#Gm10157#Clca1#Kcnj15#Ccl9
Cluster132	1700019D03Rik#Hist1h2ag#Cited1#2310043M15Rik#Gsg2#Cenpk#4930420K17Rik#Fam54a#Tuft1#Urb1#B4galnt4#Gls2#5830415F09Rik#Traip#Exo1#Gm17491#Blm#Suv39h2#Srl#Fancd2#Zc3h8#Zic5#BC030867#Fosl1#Nup210#2700097O09Rik#6720463M24Rik#Gm9746#Cabp1#BC055324#Tmem180#Tgm3#Gm12657#Bard1#Tfap4#Tead4#Gm98#Gm12666#Nkrf#Aoah#Camk1d#Gt(ROSA)26Sor#Cit#Ccdc85c#Tdrkh#Taf4b#Spin2#Slc25a33#Ccdc88c#Plekhh1#Plekha7#Gm14322#Sh3g…
Cluster133	1700029P11Rik#Lrrc31#Mageb16#Mef2b#D1Pas1#Zfp936#3830431G21Rik#5133400J02Rik#Gm14139#Adad2#AU015836#Zfp600#Tmem59l#Bcl2l14#Gm1564#C430002E04Rik#Fkbp6#Tex11#Ell3#Gm17067#Gm17449#Gpat2#Grik3#Nodal#Ap3b2#Gstm3#Kirrel2#Tex14#Tekt1#Sycp3#Stmn3#Stk31#Sohlh2#Snhg11#Slc6a1#Slc30a2#Serpinb6c#Rln3#EU599041#Prss8#Dpys#Pla2g1b#Dmc1#Mov10l1#Dazl
Cluster134	Adam19#Csad#Gm10705#Plcd1#Amotl1#Cd276#Fst#Fzd7#Tacc1#Tmem63a#Fam129a#Stk17b#Epb4.1l1
Cluster136	2810055F11Rik#Rab27b#Slc39a8#Stx11#Trim7#Tspan12#Gm106#Gfra2#Gda#Cda#Calcrl#Adm2#Mfsd6#Adamts7
Cluster138	AC132271.2#Rspo1#Lctl#Gm20487#Gm14760#Gm14124#Gm13239#Gm12139#Gcnt1#Gal3st3#Blnk#Adap2#Acp5#Axin2#Sarm1#Acan#Fam167a#Slc15a2#Shank3#AL646096.1#Arap3#Padi2#Mitf#Lypd6#AL589870.2#Pou2f2#Arhgap9
Cluster139	Bmp4#Ctsc#Gpx7#Gpx8#Cthrc1#Cd68#Col10a1#Tgfb3#F3#Thbd#Sec24d#Sdpr#Plau#Phldb2#Pdlim2#Nbl1#Mtap6#Mmp3#Mmp13
Cluster140	AC151602.1#mt-Ty#Gm6863#Gm10698#Gm10260#Abi3bp#H3f3c#Mir5105#AL807811.1#mt-Ts1#mt-Te#mmu-mir-2134-4#mmu-mir-2134-2#mt-Tc#mmu-mir-703#mmu-mir-689-2#Rpl7a-ps11#Rpl23a-ps3#Rpl10-ps1
Cluster141	8030474K03Rik#Kbtbd8#H2-M6-ps#AU018091#Gm14288#Gm16104#Gm4779#Gm6763#Gm949#Tdh#Exoc3l#Slc4a5#Slain1#Nr5a2#Arhgef16#Mup6#Mtap7d2
Cluster142	2410076I21Rik#Hpn#Cds1#Galnt3#Gm5806#Sycp1#Rec8#Mtap7d3#Dpp4
Cluster143	1700109F18Rik#Hs3st3a1#Prokr1#Otor#Gm13075#Gm15987#Gm3776#Hoxd4#Wdfy4#Sdsl
Cluster147	Bin2#Tmem30b#Wscd2#Nkain4#Mtus2#Bmf#Gm20418#Gprc5c
Cluster149	0610010O12Rik#Hap1#Rpl30-ps10#Polr3g#Gemin4#Gm13230#Gm17300#Gm6252#Sult4a1#Epb4.1l4a#Mtap7#Dna2
Cluster171	1190003J15Rik#Mpzl2#Rps2-ps6#L1td1#Aim2#Bex4#Fbxo15#Fgf4#Fgfbp1#Gcat#Gm6139#Gstp2#Rps13#Enpp3#Bex1
Cluster172	4930500J02Rik#Rps6ka6#Wfdc2#Rpp25#Alpl#Trh#Krt8
Cluster173	Col18a1#Gm17517#Kdm5b#Slc16a3#Fblim1#Rps4y2#Gm17386
Cluster176	Gm10119#Rpl3-ps1#Igfbp2#Gm15459#Gm17431#Myh10#Meg3
Cluster180	Apoe#2700094K13Rik#Nop56#Dek#Nutf2-ps1#Park7#Pcna#Pmm1#Polr2f#Dnaja1#Pomp#Rpl10a#Rpl15#Rpl17#Rpl27-ps3#Dynlt1b#Rrm2#Ebna1bp2#Sf3b5#Adh5#Ipo5#Kars#Mrpl52#Aldh2#H2afz#Banf1#Hmga1#U2af2#U2af1#Kpna2#Cox7c#Cacybp#Glrx3#Uqcr11#Etfb#Gm12184#Cct3#Fkbp3#Uqcrb#Atp5l#Odc1#Nudc#Cct6a#Cdk1#Hnrnpd#Pdcd5#Aprt#Cct7#Ckb#Hnrnpm#Ran#Psmb7#Cks1b#Fkbp4#Hspb1#Psmb5#Psmb3#Hspd1#Hspe1#Uba2#Uqcr10#Fbl#Rpl10#Rcc2#Tubb4b#T…
Cluster181	0610007P22Rik#Mllt10#Eid2#Socs6#Gnptab#Cd2ap#Faim#Zfand1#Melk#Mepce#Asf1b#Sod2#Gnpda1#Cdk2#Aven#Yrdc#Als2cr4#Map2k7#Smyd5#Snhg1#Gm8116#Chaf1a#Etv5#Zbtb44#9430008C03Rik#Ifrd2#Immp1l#9430023L20Rik#1300001I01Rik#Xpo5#Aurkb#Cd320#Got1#Suz12#Suv420h2#Mlx#Mllt4#Zbtb12#Eya3#Cd3eap#Gpatch4#Strbp#Eif2b3#Mipep#Mina#Zdhhc12#Aurka#Cdca4#Gpd2#Srxn1#Srfbp1#Mif4gd#Mier2#Fam192a#Zfp532#Wdr35#Zfp598#Fam188a#Cdk8#…
Cluster182	1190005I06Rik#Mnd1#Mov10#Mis18bp1#Cry1#Bbs2#Smarcad1#Sirt1#Bcl3#Jam2#Caprin2#Gm17492#Cenpn#Gm6768#Zfp808#Espl1#Zfp961#Esco2#Zfp568#Zswim7#Fancl#Wdr73#Usp28#Tgif2#Tfb1m#Shq1#Rps26-ps1#Rbm12#Dock6#Pop1#Pkp2#Pdhx#Nup133#Nthl1#Nptx2#Nmt2#Nfatc2ip#Mrps31#D14Ertd668e#Mphosph8#D030056L22Rik#Jarid2#Rcor2#Mtf2#Gm17646
Cluster183	Aqp3#Gm16869#Pecam1#Dsp#Car2#Zic3#Slc35f2#Slc28a1#Rpl15-ps2#Gm4613
Cluster184	Gm10184#Mdk#Slc38a4#Gm13456#Gm10259#Gm11223#Ptgis
Cluster185	Cd59a#Rap1gap2#Hddc3#Fez1#Tcf19#Tmem218#Fam174b#Msln
Cluster186	2610034B18Rik#Limch1#Rnf13#Mmgt1#Chac1#Flrt2#Hyi#S100a1#Epdr1#Tmem45a
Cluster188	9530068E07Rik#Ahnak2#Prkcdbp#Anxa8#Sh3bgrl#Ephx1#Prnp#Emp3#Lamp2#Parva#Qsox1#Atf5
Cluster191	1700019N12Rik#Lrp2#Mael#Hsf2bp#Aire#Wnt7b#Tuba3a#Gm13235#Mcf2#2610528J11Rik#2410003L11Rik#Grhl2#2410004A20Rik#Car4#Chga#Fmr1nb#Foxh1#Gm10324#Gm13242#Gtsf1l#Triml2#Triml1#Tcl1#Syce1#Stat4#Rnf17#Rhox9#Prdm14#Otx2#Dmrt1#Cyct#Hormad1#Cldn6#Gm17404#Tdrd12#Esrrb#Rpl10l#Rbmxl2#Nphs1#Dppa4#Lin28a#Dppa3#Lefty2#Ap1m2
Cluster192	AC175462.2#Lpcat4#Maff#Itpr1#Irak3#Bok#Hsf1#Clcc1#Gm1673#Gm561#Hmbox1#Hpcal1#Wdr4#Esrra#Tyw1#Enpp1#Suv39h1#Stk19#Slc25a30#Slc19a1#Sestd1#Eaf1#Qsox2#Ptrh1#Parp12#Dgkz#Nrm#Ndufaf4#Mgst3#Med22#Pgam1-ps2
Cluster198	Flywch2#Irak1bp1#Klhl2#Hist1h4i#Gm9825#Gm9864#Gngt2#Syne2
Cluster199	1110004E09Rik#Hmgxb4#Zmynd19#Fam136a#Bop1#Dnajc21#Polr2h#Cisd3#Grwd1#Eml2#Snrpf#Bola1#Cisd1#Gmnn#Acp6#Prps1#Rangrf#Chaf1b#Ahcy#Hirip3#Llph#Krt19#8430410A17Rik#Zfp57#Avpi1#Ccne1#Snhg3#Sms#Ccrn4l#Uchl1#Ezh2#Plaur#Pim3#Snrnp25#Exosc3#Sephs2#Eed#Rrp15#Dynlt1f#Rrp9#Rpa2#Rfc4#Rcc1#Ppih#Dnajc2#Porcn#Plk1#Phc1#Ddx27#Nudt1#Dbf4#Mthfd1l#Msh6#Mapk13#Lyar#Foxo4
Cluster200	A230004M16Rik#Kit#Rinl#Palm3#Abcb1a#BC033916#Cdyl2#Foxd3#Gm13154#Gm17316#Gm17621#Gm2004#Gprasp2#Tet1#Ephx2#Tgm1#Epb4.9#Tbx3#Tro#AC158547.1#Ston2#Rragd#Apoc1#Zfp534#Calca#Nanog#Nup62cl#Gm13225#Amt
Cluster201	0610031J06Rik#Itm2c#Ckap4#Ccnd2#Gas6#Gm13826#Gm15427#Grn#H1f0#Zfp36l2#Vmp1#Sulf1#Efemp2#Slc39a1#Sar1a#Rps12-ps3#Dusp1#Rcn1#Prss23#Pls3#Nr4a1#Nid1#Mmp14#Loxl2#Ctsb#Kdelr2#Ctdsp2#Tagln#Col1a2
Cluster202	Acadl#Lhfp#Man2b2#Lamb2#Kirrel#Tmem111#Slc35b2#Sirt2#Sepn1#Adam10#Herpud1#Hes1#Kif1c#Tulp4#Ube2j1#Fam168b#Sdc4#Sdc2#Rnase4#Reep5#Pros1#Plscr3#Pink1#Papss1#Pafah1b2#Ncam1#Mgat2#Cyth3#Mbd2#Cxx1b#Mbnl2#Cxcl14#Tmbim1#Tmem109#Hmgn3#H2-D1#Gm17565#Cebpd#Cd109#Cbara1#Leprel4#Pam#Sept5#Phc2#Bhlhe40
Cluster203	Bspry#Lrrc34#Nefh#Ina#Ildr1#Gm15055#Cgn#Fgf17#Gng3#Gli1#Gm13138#Gm13247#Gm7325#Grb7#Ybx2#Eras#Tfcp2l1#Spnb3#Sh3gl2#Sall4#Rhox6#Dlgap3#Ooep#Npr1#Krt17#Crb3#Dnmt3l#Mycn#Dppa2#Tfap2c#Trap1a#Trim6#Utf1#Zfp42#Esrp1#Zscan10#Gm13151#Gm13147#Gm13145#Gm13051#Gm11019#Gdf3#Calcoco2#Cldn4#Krt42#CU041236.2
Cluster204	2610002D18Rik#Grtp1#Nppb#Jag2#4930572J05Rik#Bdh1#Brca1#Btg3#Gm10664#Gm14136#Gm8841#Tst#Zic2#Fanca#Tle4#Elavl2#Tesc#Sigirr#Sec61g#Dyrk3#Pim2#Dusp4#Pdss1#Ddc#Gm9800#Tdh.1#Dusp9
Cluster205	2310061I04Rik#Klc2#Lrpprc#Hspa1b#Akap1#Mvd#Morc3#5730403B10Rik#Scaf4#Arl6#Actr8#Zfp281#Zfp960#Fam48a#Wdr83#Epc2#Hist1h2ao#Gprasp1#Gys1#Gm14292#Gcdh#Cenpf#Ccnt2#Bcor#Bnip1#Manba#Lyplal1#Cenpt#Prkag2#Pml#Chka#Setx#Egfl7#Fgd1#Vangl1#Ulk1#Ttc27#Tdp2#Tbc1d10b#Tada3#Gjc1#Herc4#Snx27#Eif2b4#Sbf2#Arntl#Rplp2-ps1#Rnf34#Rest#Rac3#Pspc1#Prune#Plekha5#Pim1#Pias2#Dhx8#Pelo#Dhx40#Pank4#Ddx10#Nsmce2#Nkain1#N4bp…
Cluster206	0610011F06Rik#Ube2g2#Fam114a2#Vamp4#Rps6ka4#Sbno2#Bag5#Fam126a#Vma21#Wwtr1#Fam173a#Ifngr1#5730494N06Rik#Naga#Ndrg3#G6pc3#4933426M11Rik#2610001J05Rik#Josd1#Il3ra#1500011H22Rik#Lemd2#Cpped1#Abhd16a#Ube2w#Eml3#Tor1b#Tns1#Clptm1#Pfn2#1810013D10Rik#Acbd3#Tm4sf1#Elmo2#Gapvd1#Bmi1#Rnf20#Dusp11#Tnfaip1#Tmem55a#Tmem43#Tmem223#Jam3#Cpne3#Carkd#Tmem219#Tmem205#Tinagl1#Elk4#Fbxl3#Nnt#Ap1s2#Ccm2#Tgm2#1810055G…
Cluster207	5730437N04Rik#Csnk1d#Lman1#Grina#Crabp2#Cdkn1a#Bnip2#Ccnl1#Cd44#Fkbp11#Ggh#Gm13835#Gng12#Stt3b#Ehmt2#Vkorc1#Tusc3#Tmem134#Tmbim4#Sec14l1#Scarb2#S100a16#Dpysl3#Rab11b#Ptk7#Ptgfrn#Arf3#Phlda3#Pdcd6ip#Luc7l2#Anxa4#0610007C21Rik#Gm6969#Zfp36l1#Fastk#Acadvl#Atp6ap1#Usp47#Ap3d1#Nudt3#Tmed3#Tmed4#Ergic1#Usf2#Fgfr1op2#Acaa2#Hsbp1#Dnajc10#Ppp1cb#Atp6ap2#Uso1#Hnrnpul2#Cdk16#Acaa1a#Lima1#Lims1#Arl3#Rhob#Erg…
Cluster208	0610007L01Rik#2310016M24Rik#Gm15487#Echdc2#0610009D07Rik#Incenp#Itga6#Ilf2#Ahctf1#Ftsj3#Gm9625#Vbp1#Ezr#Setd8#1810037I17Rik#Nsun2#Nsmce4a#Gnl2#2410002F23Rik#Cdc20#Gm14494#Hjurp#Tdg#Tcof1#Polr1c#Pold2#Lars#Lage3#0610037L13Rik#Birc5#Gm12696#Gnl3#Farsb#Zbtb8os#Xrcc5#Farsa#Rfc5#Rfc2#Mras#Mki67ip#Hmgb3#Aaas#Fubp1#Grk6#Wiz#Fam100b#Sf3a3#E2f4#Nsmce1#Nop58#Gsr#Aarsd1#Cdk2ap1#Gtf2a2#Hspb8#Spag7#Ash2l#Phf5…
Cluster209	B3gnt7#Zfp296#Zcchc3#Gm13152#Cbs#Hook1#Llgl2#C77370#Tcf7#Stag3#St14#Sfmbt2#Sall1#Rab11fip4#Pfkfb1#Lsr#Bcam#Dnmt3b#Mylpf#Lck#Crmp1#Bex2#Cdh1#Folr1#Sept1#Fam113b#Rasgrp2
Cluster210	2810474O19Rik#Pycard#Steap1#Stx3#Gm17555#Gm13139#Gfpt2#Fsd1#Ccdc64#Acsl1#Cntfr#Khdrbs3#Ncoa3#Klf5#AL591376.1#Prune2#Ppcs#Plcb4#Pde1b#Enox1#Peg10#Gjb3#Igf2bp1#Gm17392#Rbpms2#Fabp3#Slc2a3
Cluster211	Arhgap29#P4ha2#Gpx3#Flnc#Csf1#Palld#Ltbp2#Cnn1#Fhl1#Rian#Gpc3#Gm10036#Gm4737#Sgk1
Cluster212	Gm17385#Mreg#Hsd17b14#Gpa33#Tcf15#Spint1#Serpinb2#Nefl#Epcam#Tex19.1#Morc1#Gm17295#Phlda2
Cluster213	Areg#Cacna2d2#Ret#Aspa#Acsbg1#Nat8l#St3gal6#S100a3#Lgals7
Cluster214	2410141K09Rik#Gm10323#Cldn7#4930447C04Rik#Rimklb#Ppp1r1a#Gm20541#Apoa2#Gm13150#Ddx4#Cbx7#Lefty1#Zfp640#Gm16512#Krt18
Cluster215	Aebp1#Col5a2#Gpc4#Gm13654#Col4a1#Bmp1#Cav1#Timp2#Thy1#Serpinf1#Rpsa-ps10#Postn#Nid2#Maged2#Crlf1#Gm1821#Col5a1#Col1a1#Lox#Myl9#Mest#Gm15430#Tnc#Rcn3#Gm9000#Gm13841
Cluster216	1810029B16Rik#Rbm38#Cep55#Cenpm#E2f8#Rrp12#Sgol2#Shcbp1#Siah1b#Sip1#Cenph#Cdca7l#Skp2#Slc25a28#Asap2#Slc25a13#Smagp#Snhg4#Cdca5#Cdca2#Fxn#Asf1a#Srp54a#Eif1ad#Syngr1#Cdc6#2610528E23Rik#Moap1#Foxred1#Timeless#Tmem199#Elmo1#Tjp2#Cdc45#2700023E23Rik#Mns1#Chchd4#Tppp3#Trip13#Upf3b#Usp36#Cdc25a#Mrps33#Nek2#Fignl1#Utp15#Vrk1#Wwc1#Ydjc#Ccnf#Lrmp#Lsm3#Gclc#Idi1#Zdbf2#Zfp428#Ccne2#Cpsf4#Lhpp#Gpn2#Hmha1#Ttl…
Cluster218	2410006H16Rik#Igfbp7#Cltc#Rab11a#Ptrf#Ptov1#Psap#Prkcsh#Prkar1a#Prdx5#Ppic#Pgrmc1#Arf5#Pfdn5#Arf4#Pdia4#App#Pdia6#Pcolce#Pcbp2#Aplp2#Ostc#Ost4#Nucb1#Ddost#Nisch#Anxa6#Mtch1#Msn#Morf4l2#Cyb5r3#Mlec#Mgp#Acta2#Lrpap1#Ctsa#Actn1#Jund#Cpe#Actr3#Aes#Bcap31#Bgn#Bnip3l#Cald1#Calm3#Calu#Canx#Capza2#Ccng1#Cd164#Cd81#Cd9#Fkbp10#Fkbp9#Fos#Gm10177#Gm12913#Gm15387#Gm6180#Gm7292#Grb10#Gsn#Hdlbp#Hspg2#Htra1#Fbln…
Cluster219	1190007F08Rik#Col27a1#Katnal1#Itga8#Cnrip1#Gm16349#Gm6505#Iglon5#Zfp651#AC149222.1#Zbtb4#Fabp4#Twist2#Atoh8#Srr#Spsb1#Setbp1#Senp7#Ptges#Prkg1#Pcdhb22#Pcdhb17#Me3#Angptl7#5730409E04Rik#6230427J02Rik#Abat#Acvrl1#Bmper#Cd47#Fbxl7#Gm10196#Gm20419#Gm2541#Wbscr17#Eya1#Unc5c#Zfp9#Fap#Tmem53#Emid2#Tnfrsf1b#Tll1#Slc16a4#Six1#Plscr2#Pld4#Pcdh19#Parp8#Adamts4#Kif26b#Kazald1#Adra1d#Aff3#C130021I20Rik#Cd53#F…
Cluster220	1110003E01Rik#Ube2h#Yipf3#Fbln1#Fads3#Uck2#Erlec1#Ttyh3#Tapbp#Tcn2#Ehd2#Smpd1#Sel1l#Sept8#Rb1cc1#Rnf11#Impad1#Ip6k1#Jdp2#Itgav#Bmpr1a#Hdac7#Gpc1#Gm5601#Gm5776#Gm7809#Gm10052#Fosb#Chsy1#Cdc42ep3#Camk1#Cbx6#Ccl2#Cercam#Clip3#Lzts2#Leprel2#Fhl2#Nrp2#D0H4S114#Flot1#Pold4#Pmepa1#Frmd6#Rab31#Arhgdib#Fundc2#Slc39a13#Ecm1#Sppl3#Asph#Sh3pxd2a#Ece1#Tsc22d4#Erbb2ip#Uap1l1#F2r#Fam176b#Vapb#Wbp1#B4galt1#Twist…
Cluster221	1810043G02Rik#Slc35e4#Eea1#Slc35c1#Slc43a3#Snx19#St3gal4#St6galnac4#St7#Stambpl1#Stat5a#Stat5b#Ctxn1#Mgll#Eif4e3.1#Thtpa#Elf1#Thap3#Eif2c1#Stambp#Fmo1#Tmem181b-ps#Tmem19#Tpcn1#Trim16#Fkrp#Mmgt2#Mon2#Atf3#Trnp1#Tspan5#Ttc17#Ebpl#Serinc5#Ccdc109b#Gm12976#Ttpal#Ufm1#C230096C10Rik#Mafk#Mbtps2#Usp46#Vldlr#Erap1#Vezt#Retsat#Rftn1#Cebpg#Erbb2#Zadh2#3632451O06Rik#Zbtb41#Tap1#Tatdn1#Bri3bp#Gm10282#Ifi35#A…
Cluster222	AC084162.1#Msmp#AC124681.1#Scp2-ps2#Fbln7#mt-Tp#Tspan11#Gm9755#Gm8783#Gm7125#Gm6265#Gm6158#Gm5292#Gm2810#AC148768.1#mt-Tw#Cd300lh#AC161342.1#Hp#Hcls1#Pi15#Dpt#AC171500.1#Ms4a6c#Angptl1#AL592465.1#Lrrtm3#Cxcl2#AL732400.1#Adamts3#C1qtnf7#C230034O21Rik#C3ar1#C5ar1#CT033785.1#CT571241.1#Ccl3#Ccl4#Galnt13#Gm10131#Gm13772#Gm1848#AC154473.1#mt-Tk#mt-Tt#AC152062.1#Gdf10#Snord100#Eif5al3-ps#Gm10175#Hoxa13…
Cluster223	2610008E11Rik#Itga1#Lrp3#Cxcl16#Cgnl1#Fstl3#Glipr1#Grem2#Irgm1#Znfx1#Ephb3#Zfp354c#Egr2#Smarca1#Pstpip2#Pdlim4#Apbb1ip#Nexn#Mtap1a#Lrrc15
Cluster224	2310046K01Rik#Mbp#Mgat4a#Mfsd2a#Cyp2s1#Fgf13#Gas2l3#Gm6161#Mars2#Satb1#Fam110c#Rtkn2#Tmem20#Fam49a#Pla1a#Arntl2#Phtf2#Arhgef26#Pcsk1n#Ankrd37#Krt13#Krt20#Rnf125#Pcbd1#Gm2783
Cluster225	C1s#Ltbr#Mbnl1#Mgst1#Ddr2#Camk2d#Fkbp7#Tmem176b#Emp2#Thra#Smarca2#Sfxn3#Serpina3n#Lix1l#Mxd4#Tmem176a#Tnfrsf1a#Gm9762#Hoxd13#Ifi27l1#Gm14150
Cluster226	1700029I01Rik#Enc1#Pdzd4#Mapk8ip1#A230050P20Rik#Gm13157#Gm13251#Gm2223#Iqcb1#Atp1b1
Cluster227	Ccdc80#Loxl1#Lyz2#Igfbp4#Col3a1#Gas2#H19#Thbs2#Sfrp1#Rps25-ps1#Ptn#Mxra8#Cxcl12#Crabp1#Igf2#Gm13461#Col12a1
Cluster228	4930461G14Rik#Itgb7#Olig1#Prss41#Dsg2#6330407J23Rik#Ccnb1ip1#Glt1d1#Gm6792#Hpdl#Zbtb32#Syt9#Msc
Cluster229	Adamtsl4#Irs1#Nfib#Sgcd#Dclk1#Cd14#Figf#Gm7332#Gpc6#Gpr126#Zfp362#Smpdl3a#Ppbp
Cluster230	2510009E07Rik#Itih5#BC055004#Cd72#Gm14567#Htra3#Zeb1.1#Ebf3#Sema3d#SNORA8#Nfia#Arhgap20#Mafb#A930038C07Rik#Gm5559
Cluster231	1700042O10Rik#Ly6g6d#Tlx3#Lingo3#Ahsg#C1ql1#Gm10224#Cpn1
Cluster232	Abca1#Hoxd8#Heg1#Casp8#Gm15051#St3gal1#Tmlhe#Farp2#Ptprv#Arhgap31#Cfh

## Sheet: Reprogramming (Roy & Sridharan)
Cluster27	1700021C14Rik#BC037703#LOC630963#C130090K23Rik#Tsx#Thsd4#Bicd1#Ly6f#Slc12a8#Hspbap1#Mdfi#Cenpo#Myl7#Zfp612#4833420G17Rik#Cttnbp2#Pelp1#Tmem46#Gimap9#2010004A03Rik#En2#Prkaa2#Il13ra2#4930506M07Rik#Kcnn2#Serac1#Lgi2#Atp8a1#Liph#Tert#4930519F16Rik#Cd68#Nlrp9b#Zfp750#Gstt2#6530401N04Rik$6530401N04Rik#EG667977#Popdc3#Epgn#9630025I21Rik#Klhl15#Rps6ka5#Mapk4#Alms1#Marco#Zranb3#Camk1d#9630031F12Rik#Clcn2…
Cluster28	2410004A20Rik#Gdf3#Tmem40#Stra8#Abcb1a#Rasgrp2#A2m#BC038822#Pitx2#Aire#Apoc1#Mov10l1#B3gnt7#Cdyl2#Lonrf3#Dhtkd1#Dppa3#Kbtbd8#Zfp185#Guca1a#EG434179#EG434760#Snap91#Epb4.9#Fbxo2#Krt18#LOC100043974#Mtmr7#Myo1f#Nodal#OTTMUSG00000001246$Gm428#Tslp#Gldc#Tex15#Btbd11
Cluster37	1190002H23Rik#Srr#C1qc#Zmat1#Usp53#Gdnf#LOC100046410#Aldh1a2#1700001E04Rik#D18Ertd653e#Runx1#Ednra#Tnnt2#AW061290#Trpc4#Islr#AA536749#Tlr4#Myh11#Ifi44#Cntnap4#Nfatc4#Tspan11#BC043301#Scn5a#Zfp467#Hspb7#Frk#Tyrobp#Traf5#Foxg1#1600002O04Rik#Ppp1r3d#Pparg#2310002B06Rik#Ifit2#Mds1#Tmem25#Ebf1#Scx#Dbc1#Adra2a$Adra2a#Akap6#Kif15#Tle2#EG633640#Sparcl1#Dpt#Pstpip2#Prss35#Ank2#Il1rl2#Mid2#Smyd1#B230120H23…
Cluster38	0610013E23Rik#Fbxw17#Sdc3#Lamb2#Derl2#Serf1#Rasa2#Rasa3#9430020K01Rik#Sh3pxd2b#Chkb#1200009F10Rik#Trim3#Tnfrsf23#Fut8#Dkk3#Sfrs2$LOC100043293#Lztfl1#Aldh6a1#Col7a1#Ormdl3#Dlg3#Sec22a#Jam3#Dnalc1#Slc12a4#D0H4S114#Rnf215#Bet1#Tgfb1#Cdc42ep1#Niban#Dnm1#Scgn#Rpgrip1#March2$LOC100044703#Ahr#Olfml2b#Opn3#Dnm2#Slc35b4#LOC676870#Dpp7#Slc35a2#Rassf8#Rbm9#Dpp8#Smoc1#Ilvbl#2810432L12Rik#Thbd#Atf6#Sgce#Fgfrl…
Cluster39	1110007M04Rik#Ifrd2#Ptpmt1#Mtvr2#Msto1#Arrdc3#Ppan#Msh6#Mrpl45#Cstf2#Pkp4#Exosc6#Skap2#Mgst3#Cpsf3#Pcgf6#Bre#Tjp2#Tera#Glul#LOC671878#LOC433780#Espl1#Slc9a3r1#LOC100047009#Mcts2#AU021838$AU021838#Slc7a3#Dut#Slc16a1#Klf4#Klf10#Dhx32#Psrc1#Lmnb1#Ckap2#D14Ertd500e#Pik3cd#Bhlhb2#Slc39a10#Cdyl#Perp#Pim3#Fbxl10$Fbxl10#Spint2#Cdca5#Maz#Emb#Sgol2#Jmjd1a#Cdc6#Nipsnap1#Nsmce1#Pak4#Cops8#Hirip3#Zfp428#Zfp51…
Cluster40	1110038D17Rik#Col15a1#Metrnl#Maml1#Ankrd44#LOC100044221#Pftk1#Avpr1a#Sall2#Fbxo17#Kremen1#Hlx#Zfp677#Zc3h3#Hist1h2ad#Samd4#Fbxo32#LOC100046255#Hivep2#Zfp354c#Vamp5#Hist2h3c2$Hist1h3b#Rspo3#2810048G17Rik#LOC100047573#Pdlim5#Dlk2#Gfi1b#T2bp#Stk39#Abtb2#LOC100047863#Pdgfra#Atrn#Gfra2#Tbx4#Tada1l#C030003D03Rik#LOC677213#Pde2a#Dhrs3#Rgnef#Ets1#Ldb3#Parp8#Ddit3#Gnptg#Tmcc2#Tec#Gm106#Lynx1#Nox4#Cyp39a1#…
Cluster41	0610040J01Rik#Prrg3#Wwc1#Car11#Dhx35#Pkp3#H2-Ke6#Ttc30a1#Wdr76#Has1#E130014J05Rik#Prkcz#2610019F03Rik#Pmfbp1#2010317E24Rik#Zdhhc23#Zfp516#Hmha1#Capn10#Zscan12#Usp6nl#Hps1#Ccdc111#Depdc6#Plekhg1#Casc5#Arl4d#Orc1l#Als2cl#Arc#Ofd1#Alox5ap#Apoa2#Mpp7#Aldh5a1#Akr1c18#Alg6#Ccdc77#Cep152#E130120F12Rik#Prkcbp1#E130306D19Rik#Plekha8#Gramd1b#Tmem180#Tnip2#Gse1#Lrrc28#Lin9#Eomes#Rhox9#BC048403#Rpgr#Epas1#Rp…
Cluster42	Cbx7#Nr6a1#Nhedc1#Ccdc88c#Cidea#Map4k1#Sema4a#Slc39a4#Gca
Cluster43	1-Sep#Nos1$2310005C01Rik#Cntfr#Rcsd1#8430419L09Rik#1700001L05Rik#Qprt#6720457D02Rik#2210418O10Rik#Ppp2r2c#2410017P07Rik#2310026E23Rik#Pla2g1b#Cry2#4930424G05Rik#Pga5#Pde7a#4930539E08Rik#4930583H14Rik#4933424B01Rik#Alpk3#Ccnt2#Cep72#Chn1#Clcnkb#Hvcn1#Klf15#Krt42#Krtap5-1#LOC100046843#Ly6g6e#Mlf1#Neud4#Tnnt1#Fhod3#Abcg1#Trim2#Trdmt1#3-Sep#Trf#Bdh2#Tex9#2010001M09Rik#Gpa33#Utp14b#Tyw3#3830417A13Rik#…
Cluster44	4631416L12Rik#Zbtb44#Wdr40b#Acot1#Etl4#Tcfap2c#LOC100047936#LOC100047579#Clu#Bcl3#Tle4#Cldn4#Krt8#Ngfr#Notum#Aldoc#St14#Ung#Grb7#Spint1#BC004728#Sox13#Dsg2$Dsg2#Sall1#Depdc7#Reep6#Nup210
Cluster45	2310042E22Rik#Lrrc26#Mall#Defb1#Clec2i#Clic3#Il22ra2#Krt14$Krt14#Lamb3#Prdm8$LOC100045224#Ephb6#Gpr37#Shc3#Samd10#Gpr155#Plek2#Dsc2#Mybl1#Trim7#Hrh1$Hrh1#Myo1a#Atg9b
Cluster46	1110018M03Rik#Scara3#Edg3#Snai2#BC029169#Sorcs2#Fmn1#Tfpi2#Col10a1#Nfatc1#Olfml3#Npal1#4930402H24Rik$4930402H24Rik#Prkca#Ctla2a#Adamts2#Adamts5#Id4#Lbh#Galntl4#Wnt9a#Ulk2#Foxc2#Speg#Eln#Has2#Twsg1#Zdhhc2#Grb14#Alcam#Rhoj#Ptx3#Chst11$Chst11#Igfbp6#Itga8#Lum#Tmem119#Fkbp7#LOC100044115#Siglecg#Dnajb4#Mamdc2#Mfhas1#Mical2#Mmp23#Mrc2#Svep1#Fkbp14#Sphk1#A930038C07Rik#Mxra7#Rgs4#Arhgef17#Mylk#Myo7a#Sert…
Cluster48	2210407C18Rik#Col9a2#Kcnq1$Kcnq1#Chga#Ankrd56#Smtnl1#Fmn2$Fmn2#Lmx1a#Eml5#Itgae#Cubn#4930558O21Rik#Serpinb2#Fgf1#Gabra1#Slc5a4b#Tktl1#C030039L03Rik#Rgs9bp#Epha1#Kifc1#8030462N17Rik#4930591A17Rik#Ccdc45#Serpini1#Bbox1#Rfx2#BC057371#Kif26a#D330028D13Rik#4933404M19Rik#Scd3$LOC100048724#Fancm#Rspo1#Bard1#Gpr133#Ttn#Ttyh1$Taf1#Gnat2#Klb#5830483C08Rik#4933433K01Rik#Pla2g12b#BC013481#Plac1#A630077B13Rik…
Cluster49	Cfh#Plekha6#Pof1b#Npy2r#Col17a1#Cml3#Klk1b16#Klk1b3#Ms4a4b#Wif1#Exph5#Tmigd1#Serpinb3b
Cluster50	1700029P11Rik#Prmt8#Aurkc#Pycard#Calca#Tcl1#Smc1b#AU022751#Spink3#Ina#5730507C01Rik#Jam2#LOC100040854#Cox7a1#4930550L24Rik#Piwil2#Cyct#Neurod1#Arg2#LOC100046433#2410004F06Rik
Cluster51	1600002K03Rik#Nfib#Neto1#Ifi35#Ssh3#Entpd5#Met#Ccdc122#Ssh1#Ephb2#Lrrk1#Cdgap#Gdpd1#Unc5c#Tmem62#Garnl1#LOC627912#Agtr1a#Tanc2#Fbxo4#LOC100044162#Agxt2l2#Ssr4#Fbxl3#LOC100046044#Cdh13#Abp1#Trim68#Wdr60#2010200O16Rik#Mapk11#Il13ra1#Gpr126#Zbtb4#Wdr4#C1qtnf6#Mfap3l#Isgf3g#Gpc6#Wars2#Zbtb20#Cachd1#Mxd4#Jak2#Spert#Efna5#Abhd14b#Tk2#Thbs3#2010005J08Rik#Kcna7#S100a1#Dzip1l#Tenc1#AW146242#Krt6a#Pctp#903…
Cluster52	1190002A17Rik#Tcfec#EG432988#Ttc25#EG546272#V1rb3#BC085284#Tulp2#Nostrin#Nefm#Myo5c#Ccdc85a#4933403G14Rik#2300006N05Rik#Nudt10#Pou4f1#Rhov#Reps2#1700011F14Rik#Sh2d5#Rims3
Cluster53	2210038L17Rik$2210038L17Rik#Ehd2#Reep3#Mrgprf#Antxr2#Ccdc109b#Tbx18#BC035537#Rdh10#Tmem129#Gp1bb$Gp1bb
Cluster54	1110001A07Rik#Stk19#Cbara1#Cav2#Il10rb#Lrrc14#Acox1#Zbtb33#Vps26b#C1galt1c1#Bag2#Trappc5#Eml3#Tmem65#Alg5#2310047D13Rik#Pank3#Os9#Col4a5#Adcy6#Tmem43#2610529C04Rik#Gas6#Tusc1#Tox4#Blcap#LOC100046682#Clcn4-2#Slc37a3#D5Ertd579e#Stambp#2610034B18Rik#Brap#Trim47#Ube2b#3830406C13Rik#Nt5m#LOC100048460#Cep170#Agpat7#Hoxd9#Zfp46#Zfhx3#H47#Tor1b#Bag5#Tm9sf1#Fbxw4#Loxl4#Hyal2#Scrn3#Rin1#Ak3#Tppp3#BC039093#…
Cluster55	4930502E18Rik#Cldn6#Ankrd35#Lck#Asah3l#LOC100046128#Cyfip2#4930519N13Rik#Pecam1#EG381936#4933437F05Rik#Mrc1#A530057A03Rik#Ccno#Gna15#Tm4sf5#Sp110$LOC100040974#Gli1#Chrna9#Pramef12#BC050210#Cldn7#Foxd3#Pzp#Ptch2$LOC674483#Foxa1#Gm9#Tmem16j#Serpina3m#Blnk#Prtg#Fgf17#Prph#Fgf15#Plekhk1#Stat4#Gm1070#Mmrn2#Dusp27#Ltb#Dpp4#Ldoc1#6330534C20Rik#Lama1#Ard1b#LOC100045707#Apobec2#Igsf21#5830482F20Rik
Cluster57	1700019N12Rik#Lrp2#Nlrp4f$Nlrp4f#D630023F18Rik#Amph#Lrrc2#Tcstv1#Usp26#Gm1967#Tex11#AF067063#Six6os1#Enox1#Slc47a1#Ell3#Rhpn2#B020006M18Rik#Rbm44#Dmrt1#Pdcl2#Dleu7#Mep1b#D1Pas1
Cluster59	5033414K04Rik#Osm#Pcf11#Repin1#Edg2#Lrch2#Hipk2#Rtn2#Purg#Gdf15
Cluster60	1190005I06Rik#Pla2g10#C130069I09Rik#Sult4a1#Taf7#Gm440#Baz2a#Poli#Bbs2#Rif1#Mylpf#Mnd1#Kit#Hunk#Clcn3#Akp2#Palb2#Phlda2#Caprin2#Zscan10#Zfp296#Actr3b#Gpx2#Ttpa#Trh#Gprasp1
Cluster61	2810055F11Rik#Tesp2#Fgfbp3#Tmem16c#Krt20#Itga4#Irx5#6330512M04Rik#Oas1h#Invs#Gpr1#Tpcn2#Ube2m#Gramd1c#Cldn14#6030446N20Rik#Mtmr11#Mpeg1#Aox1#Ccdc68#Lif#Cd80#Fv1#Trib2#Tnfrsf10b#2900024O10Rik#Spink4#Fbxl2#Sco1#E430018J23Rik$6430604K15Rik#Hipk3#Zdhhc14#Zfp202#Hhat#Senp7#Zfp697#Camk2d#Sema6b#Dixdc1#Pcdhb21#Atp10a
Cluster62	Grk6#Ssu72#Tspan7#Hspb8#Nsbp1#Mapk13#Jund1#Irak1#Parp12#Ptp4a3#Rac3#Ptprv#Igfbp3#Setd8#Tanc1#Hsd3b7#Sh3glb2#Rgl2
Cluster63	Aox3#Otop1#Tox3#Csprs$Csprs#Klk11#LOC100047347#Mt4#Olig3
Cluster64	Aox4#Lcn2#Myb#Arpp21#Clec2g#Klk1b24#Serpinb7#Edg8
Cluster65	1110067I12Rik#Pbp2#Hpse#Zfp11#Plcb1#Acsbg1#Trim40#Zfp553#Car12#A930008G19Rik#Ptpn13#Egfl6#Rnf39#C1qtnf1#Them4#Trpv4#Gpr50#Enox2#Serpinb8#Klk10#Kif16b#Inadl#Ifitm6#Dos#Ppp1r14c$LOC100043766#Ifi27#AI427515#Sh3bp2#Ifi203$Ifi203#Cldn9#Alox15#Afap1l2#C3#Tcfap2a$Hrc#Sprr1a#Gatm#Bcas3#Sncg#Clrn3#Krt80#5730410E15Rik#Ngef#Cyp4b1#Nrk#6530401C20Rik#Ly6d#Cxadr
Cluster66	4732466D17Rik#Ugt8a#Ttc29#Cabp1#Elovl2#Tdpoz1#Esm1#Tcstv3#Bex6#Trim63#Magea5$Magea1#Clca4#Nlrp4c#Cox7b2#Nlrp14#Pet2#Crisp1#Ceacam20#Iqcg#Itpka#Tex13#AU018829#Spz1#Dub2#Slc6a1#Dnajc6#She#Zp3#Caps2#Rlbp1#Dhdh#Pou4f2#DXBay18#Pla2g5#Pdha2
Cluster68	BC028528#Vegfc#Lpl$LOC669888#LOC100044234#Pdk4#Ppp1r14a#Sfrp2#Cxcl5
Cluster69	Adamts4#Cpxm2#Maob#Megf10#Arsj#Itga5#Gfra1#Syt13#Tshz3#C130021I20Rik#Adcy7#Ahrr#Shox2#Fmod#Nov#Dach2#Angpt1#LOC100044927#Gpr64#Vldlr#Wnt5a#Cacna1c#Car6#Chst2#Rftn2#Eya4#Ccbe1#Cd200#Gamt#Sytl2#Slc4a4#Gal3st4#Cdh10#Itgbl1#Serpina3g#Fap#Kcnk2#Klhl30#Lhx9#Lyzs$Lyz#Maf$LOC100047419#Matn2#Runx1t1#Fabp4#Ggcx#Tnfrsf11b#Ttll11#C1qa#Rgs5#Eml1#Rbms3#Eif2s3y#Gucy1b3#Wipi1#Zeb2#Cap2#Pcdh18#Atxn1#Myom1#Artn
Cluster70	2310057J16Rik#Pipox#Tcea3#Stag3#Mtap7d2#Zfp473#Tcfcp2l1
Cluster71	1110020G09Rik#Xpo4$Lats2#2810474O19Rik#Elf3#A230054D04Rik#Mrps31#Dicer1#1110034A24Rik#Llgl2#Zfp692#Btbd14b$Btbd14b#1700029I01Rik#LOC100044395#Zfp36l1#Acot8#2610002D18Rik#Impa2#Zfp462#Calml4#2610209A20Rik#F730047E07Rik#Tcf7#Nmnat2#E2f4#Smek1#Ncoa3#Dnmbp#Sfrp1#Mga#Csad#Rnmt#Mitd1#Coil#Rnd2#LOC100045551#Chd2#Prpf40a#Klhdc4$Klhdc4#Ccdc117#Polr3g#Jarid1b#Bambi#Plcd1#Iqcb1#BC003993#Pim1#Kif22#B230118H0…
Cluster72	6330406I15Rik$6330406I15Rik#Npr3#Smpdl3a#Slc41a2#LOC100044161#Mn1#Nedd9#Glt8d4#Tmeff2#Tgfb2#Glis3#Srpx#Egr2#Adamts12#Tnmd#Tll1#Adam12#Slc1a6#Dkk2
Cluster73	3110007F17Rik#Prr16#Unc13c#Heph#Kcnj15#Clec4n#Ptgfr#Evi2a#Ms4a4d#En1#LOC100044677#B930095G15Rik#Cacna1h#Sema5a#Slc2a9#Acvr1c#LOC100045019#Defb10
Cluster74	AA467197#Rragd#Enpp3#Tbc1d8#Ocln#LOC675366#LOC100045988#Chd7#Plch1#Pnma2#Prkcb1#Ppp1r9a#Ccdc120#Hpdl#Sox15#Tek#Grhl3#Rbm35a#Ptpn6
Cluster75	2210010L05Rik#Ddef2#Tnfsf9#C4b#AK129128#Tgm3#Lad1#LOC100046871#Klf16#Cldn3#2310079N02Rik#Prom1#Sbsn#Rb1#2210411K11Rik#Taz#Slurp1
Cluster76	Elavl2#Rnf125#Prx#Podxl#Itgb4#LOC672215#Naprt1#Sigirr#Fgfbp1
Cluster77	1810055E12Rik#Nqo1#Enc1#Mmp13#Evl#Rbbp8#Fxyd6#Steap1#Rnf128#Fsd1#Snta1#Tbc1d7#Fzd7#Chac1#Ccpg1#Ccl2#Dym#Mcpt8#Cask#Anapc10#Igfbp5#Adck1#Mpp5#Efemp1#Mmp3#Arhgdib#Loxl3#Csf1
Cluster78	AW049765#Fxyd3#Galnt12#Gna14#Lbp#Grm4#Capn5#Nat8l#Chit1#Cda#Apod$Apod
Cluster79	2210023G05Rik#Cyp4f39#Lrmp#LOC100048071#Csn1s1#Aoah#Myo1g#Rab17#Fut9#Mme#Dock9
Cluster80	AI467606#Zic2#Nr5a2#LOC100048307#LOC100046333#Irak3#Rhox6#Sema4d#Pde9a#Aqp3#Syt9#Ddc
Cluster81	Acpp#Slc39a8#Tac2#Calcrl#Asprv1#Lypd3#Dapl1#Arg1#S100a3#St3gal6#Cacna2d2$Cacna2d2
Cluster82	Calcb#Tmem16d#Dmkn#Ehf#Krtdap#D830007B15Rik#Cldn11
Cluster84	Aspa#Mst1#LOC100044204#Cyp11a1#Oit1#Tmem45b#C030045D06Rik
Cluster86	Ccnjl#Gsta3#Spa17#Ildr1#Dnase2a#D10Bwg1379e#Oas1c#Fgd5#Insm1#Exoc3l
Cluster87	Adamtsl1#Pkia#Micall2#Ccdc82#Ptprd#BC006779#Ptprz1#Zfp672#Hoxa10
Cluster89	4933426K21Rik#Spesp1#Stk31#Taf7l#Dpys#Lefty2#Lgals6#Rnf17#Car4#Nxf3#Triml1#Calcoco2
Cluster91	4833446K15Rik#Slc2a10#Pdgfd#Gpr149#Acta2#Pcdhb22#Lhx2#Glrb#Abi3bp#Lancl3#LOC100046963#Bnc1#Agtr2#Fli1#Jarid1d#Asb5#Cd52#Dclk1#Atp8b1#Adamts6#Gem#Lrrc4c#ORF63#C1qb#Ifi204#AI646023#Emx2#Ebf2#Hmcn1#Uty#Spock3#Hey2#Col8a2#9430028L06Rik
Cluster92	2310010M24Rik#Lemd1#Kcnip4#Klk1b27#LOC100046930#Serpinb5#Them5#Bmx
Cluster95	1110006O17Rik#Foxc1#H60$H60#Bmper#Hoxd8#Pdzrn3#Ccdc90a
Cluster97	Ccl7#Odz3#Cdo1#Ppbp#F3#Prrx1#Vcam1#Gzme
Cluster104	Acp6#Rps6ka1#Mal#Pir#Etv5#Ifitm1#Itpk1
Cluster106	Casp8#Golim4#Pkd2#Tmem123#Hist1h1c#Ier5#Emp2#Nfix#Enpp1
Cluster113	0610007L01Rik#1110008P14Rik#Rhoc#Dsel#Fxyd5#Tmem50b#Rhbdd1#Dlgap4#Rcn1#Raf1#Ddah1#Rab34#Sgk#Pxdn#Dctn5#Capn7#Zyx#Ptrh1#Col6a1#Dhrs1#Ppt2#Col4a2#Ppap2c#Psph#D6Wsu176e#Ppap2a#Sumf1#Pmp22#Ckap4#Bysl#Tnc#Plk2#Cdkn2b#Pkp1#Plekhc1#Col3a1#Pja2#Slc35e1#Pdxdc1#Cdh11#Gpx3#Ufm1#Pdrg1#Axl#Pdia5#Pld3#Coch#Pcyox1#Sox4#Mocs2#Ank#Gns#Txndc4#Mobkl1b#Amotl1#Mmp2#Prr14#D17Wsu104e#Pafah1b2#Tex261#Mgat2#Alg10b#Frmd4a…
Cluster114	0610037P05Rik#Sidt2#Lamp2#LOC100047800#Cyba#Pigs#Epdr1#Sri#LOC100047647#LOC100046643#9130404D14Rik#Phlda1#Fez1#Tbpl1#Ifi30$Ifi30#Akt1#D10Bwg1364e#Pip5k1a#BC056474#Stk25#Klhl5#Ahnak2#Crk#Osbp#Cnot6#Lrrfip1#Adfp#Ccdc139#Hspc171#Fos#Tfrc#Tmed4#Blvra#Rab8b#9530068E07Rik#Tegt#Flnb#Chchd3#Tes#Fkbp10#Prkag1#Ugt1a1#Hp1bp3#Bnip2#Tmem32#Tmem45a#Acadl#Cd109#Gemin7#Tmub2#Tmem185b#Gatad1#Praf2#Dip2a#Cd8b1$241…
Cluster115	2610305D13Rik#Mael#Dazl#Ddx4#Hormad1#Sycp3#Dub1#Prdm14#AV320801#Mcf2#Efhc2#LOC639910#EG435970#LOC100044048#EG434726#Dppa2
Cluster116	2410146L05Rik#Mybl2#Stmn1$LOC100039888#Dnmt3a#Inpp5d#Lefty1#Manba#Myst4#Tspan13#Utf1#Gadd45a#Sox2#Gab1
Cluster117	Arhgap29#Pcolce2#Dnajb9#Phldb2#Gpx7#Tmepai#Ptgs2#Ccdc80#Nid1$LOC630776#P4ha2#Pdgfc#Crabp1#Cdc42ep3#Inhba#Kdelr3#Lphn1$Gtl2#Rcn3#Fmnl3#Gnb4#Thy1#Selm#Bmp4#Serpinf1#Fhl1
Cluster121	4930488E11Rik#Rcor2#Tcf15#Porcn#Cdca2#Klf5#Map3k7ip3#Sall4
Cluster125	Aldh1l2#Armcx3$Armcx3#Ankrd1#Pdgfrb#Flnc#Mfap5#Epb4.1l3#Cnn1
Cluster126	Aard#Xlr5a#Fmr1nb#Lin28#Npl#OTTMUSG00000004010#Slc2a3#Pnma5#Icam1#Trim6#Xlr4c$LOC100044048#Gng3#Tex14#Dppa4#Esrrb#Nanog#BQ559217
Cluster127	Bex2#Dnmt3b#D14Ertd668e#Fbxo15#Fgf4#Jarid2#Smtnl2#Folr1#Dusp9
Cluster130	4631422O05Rik#Actg2#Cthrc1#Ogn#Ptn#Smoc2#Grem2#Vcan#Tgfb3#Fads3#Thbs2#Fbln5#Zfp9#Col11a1#Col12a1#Lrrc15#Nuak1#Col5a3#Angptl2
Cluster133	2410022L05Rik#Nfatc2ip#Hnrph3#Zfp740#Phf17#Donson#Rarg#Gltscr2#Whsc2#Zfp568#Gnl2$Gnl2#Erf#Rbmx2#Fbxo22$Fbxo22#Sirt1#Mkrn1#Ltbp4#Las1l$Las1l#LOC100045677#Isyna1#Igf2bp1#Cenpm#Ccne1#Ftsj1#Tcf3#Ubxd4$EG621629#Gins2#Cenpf#Ccdc99#Clp1#Mrpl15#Aggf1#Syce2#Klhl13
Cluster134	3110003A17Rik#Tpm2#Tagln#Abcc1#Col1a2#LOC100046740#Mfge8#Ctgf#Cav1#Cnih#Idh3a#LOC100045031#Glrx5#Tpm1#Tmed9#Abcg2#Serinc1#Tns3#Gng10#Serpine1#Efemp2#Sec13#Dstn#Ppic#B2m#Ndufb7#Armet#Lox#Crtap#LOC640441#Crlf1#Prnp#Ahnak
Cluster135	Acta1#Postn#Gjb2#Col5a1#Col8a1#Mmp14#Copz2#Mfap2#Cxcl12#Moxd1#Cxcl14#Mmd$LOC100047565#Cyr61#Msrb3#D4Bwg0951e#Mxra8#Dbn1#Pea15a#Ddr2#Pdgfrl#Glipr1#Ttc9#Vasn#Gp1bb#Farp1#Prkg2#Frmd6#Sdc2#Twist2#Gadd45g#Large$Large#LOC100047339#Atf5#Pdlim2#Fbn1#Qsox1#Lpp#LOC100046560#Irak2#Creb3l1#Mgll#Cmtm3#Glce#Unc5b#Unc84b#Glipr2#Fosl2$Fosl2#Sdpr#Slit2#Fstl3#Ier5l#Chst14#Cdh2$Cdh2#Hspb6#Tsc22d2#Prrx2#Gpr176#Wisp2…
Cluster136	0610010K14Rik#C530028I08Rik#1810029B16Rik$1810029B16Rik#1500003O22Rik#Ccnf#LOC100046988#Galnt7#Trmt11#Ube2t$LOC100047829#Gcat#Esco1#Ssbp4#Dfna5h#Sdad1#2310007H09Rik#Nt5dc1#Nudt14#LOC100046186#Abhd6#Tomm40l#Tpd52l1#Bola1#BC055324#Spen#2310007F21Rik#Cyp2s1#Pole2#Ica1#Lyrm4#Fbxw7#Timeless#4632404H22Rik#Zcchc8#X99384#C79407#Dhcr24#Sec14l1#Cdca7#LOC100045148#Fbxw9#Tiparp#Ep300#Socs2#9430016H08Rik#Sh3g…

## Sheet: dedifferentiation (Seirup et al
Cluster200	AK010878#Usp18#Lgals3bp#Tapbp#Gsta2
Cluster202	Aldh6a1#Ccl9#Cyp3a25#Atp5g1#Il1rap#Gchfr#Aspg#Cmbl#Uroc1#Slc22a7#Scarb1#Prodh#Sardh#Ang
Cluster215	5730507C01Rik#Snrnp35#Plac8#Fam86#Ercc5#Elovl1#Nacc2#Pde6d#Hfe2#Clock
Cluster217	Acer3#Dntt#Vps45#Cxcl10#Slc16a10#Ccdc97
Cluster218	Adrb2#Lacc1#Sowahc#Wee1#Mpzl3#Rabl3#Dusp5#Ier5#Scara5#Rpp38#Arid5a#Pdk4#Rpp30#Pim1#Tnfaip3#Gm20783
Cluster219	9130409I23Rik#Aldh3a2#Esr1#Etv6#Agfg2#Kcnn2#Sec24a#Slc17a8#Acnat1#D3Ertd751e#Plekha5#Fbxo21#Adra1b#Rwdd3#Grtp1#Oxld1#Grk4#Ctse#St7l#Slc16a2#Clmn#Qpct#Cecr5#Dapk1#Mob3b#Trim2#Tk1#Acyp2#Dennd4c#Lmbrd2#Tatdn3#Slc35b2#Cnp#Dnajc12#Ly6a#Spc25#Tbc1d17#Col27a1#Dnph1#Rdh5#Gm13139#Asb13#Tle1#Taf7#Arsg#Lin7a#Suv420h2#Tirap#Cwf19l1#Pnkp#Ccdc84#Pet100#Abca8a#Phkg2#Fam81a#Fam20c#F830016B08Rik#Mtmr14#Vgll4#Zksc…
Cluster221	Eif3d#Ggnbp2#1110004F10Rik#Atad1#Rsl1d1#Rpl22l1#Rnh1#Riok3#Rab10#Ptpn2#Ppp3r1#Hnrnpa1#Sdcbp#Snrpf#Isca1#Abce1#Ywhag#Mtpn#Tpm4#Mrpl1#Wdr1#Cttn#Ywhah#Mki67ip#Tuba1b#Cstb#Ykt6#Mdm2#Wdr43#Csnk1a1#Usp47#Atf4#Syncrip#Actn4#St3gal4#Mapk6#Tubb4b#Map2k1#Ubl4#Mak16#Tpr#Lrrfip2#Timm8a1#Lrrfip1#Tm4sf4#Lrrc59#Taf9#Cops2#Tceb1#Ldhd#Adss#Rheb#Lcp1#Aldoa#Seh1l#Kpnb1#Capzb#Slc25a39#Arl6ip5#Cast#Ppp2cb#Cltc#Ccdc55…
Cluster222	2410015M20Rik#F13b#Maob#Pdia4#Lypla1#Atp5k#Srsf3#Tspan31#Mrps28#Acbd5#Gstk1#Immp1l#Iigp1#Akr7a5#Brk1#Mrpl12#Smu1#Trib1#Cyb5b#Adh4#Lars2#Psmb5#Ociad1#Iyd#Lpgat1#Sdhd#Pccb#Lactb2#Gtf3c6#Gls2#Lonp2#Qprt#Psma5#Lman1#Mettl7b#Sord#Serpina12#Mbl1#Ech1#Amfr#Mrps33#Ugt2a3#St3gal5#Mettl7a1#Dcun1d5#Ccbl2#Mien1#Tmem256#1110058L19Rik#0610007P14Rik#1110001A16Rik#Oxr1#Hmbs#Pdcd4#Hpgd#AI462493#Tmem234#Myo1b#Akr1…
Cluster224	BC021614#Cap1#Eif5b#Capn2#Ncoa4#Fam50a#Nop58#Map7d1#Tor1aip2#Tubb5#Mospd1#Galk1#Pnn#Lmna#Sptan1#Upf3a#Mvp#Cd2ap#Phf10#Gpatch4#Pls3#Cndp2#Sltm#Rtcb#Impdh2#H2-Ke2#Prosc#Diap1#Ddx27#Bcas2#Dnaja3#Aimp1#Ddb1#Eif6#Uba3#Atp6v1c1#Bax#Ipo7#Pdlim5#Gnb1#Arf6#Lpin2#Vps35#Stub1#Clic4#Kpna2#Tmsb4x#Trmt10c#Clns1a#Grina#Car2#Gm16286#Ube2i#Rars#Prelid2#Glod4#Ssrp1#Sept2#Ewsr1
Cluster226	2510039O18Rik#Ablim1#Slc25a4#BC017643#Espn#Nek4#Epb4.1l2#Dph6#Baz2a#Dcaf17#Dnajc13#Smarcad1#Chchd6#Ift74#Tsen2#Zmat3#Asap2#Renbp#Ap5s1#Sdr39u1#Cdkl2#Phf16#Gm20939#Mrgbp#Tap1#Zc3h8#Ctns#Plcl1#Camsap1#Dgkq#Stk17b#Mus81#Abca5#Dennd6a#Ap1g2#Gm13157#Apc#Fosl2#Grb10#Nkiras2#Irgq#Poc5#Rangrf#Lrif1#Cep290#Pcbp4#Hs2st1#Parp10#Polr3b#Itga3#Clasp1#Oraov1#Parp14#Hs1bp3#Ccdc82#Enc1#Dcp2#Agrn#Morc2a#Spats2l#Ra…
Cluster300	Pkm#Anxa2#Ptrh1#Egln3#Tes
Cluster305	Apol10a#Klhdc9#Cdhr2#Gm19345#D630033O11Rik
Cluster306	Atp8b5#Sipa1l3#Oas3#Igsf9#Gatsl3#Tmppe#Trim45#Zscan20#Usp27x#Bcl9
Cluster307	Ereg#Sema4c#Zswim6#Gpr97#Uchl1#Nos3
Cluster309	2310007B03Rik#Fcer1g#Htr1f#Apbb1ip#Veph1#Gnai1
Cluster311	Ankrd6#Tubb4a#Sass6#Fam111a#Shisa4#Myo5a#Zwilch#Lrrc27#Stc2#Schip1#Kcna7
Cluster312	2310057M21Rik#Kctd13#Ppp3cc#Fbxl18#Gbp2#Tmem80#Jdp2#Slc10a6#Tnfaip6#Lepr#Alpk1#Fam107a#Me2#Zfp248#F2rl1#Adcy1
Cluster313	3110007F17Rik#H2-M2#Fbxo32#Mycl#Trpt1#Cdk1#Ncam2#Ngf#4921517D22Rik
Cluster314	BC053749#Tnfaip8l1#Hhipl2#Zfp763#Gatm#Thsd1#Ppp1r14a#Cbx7
Cluster315	Abcd1#Hykk#Col5a3#Hsd3b2#Tppp#Lipg#B3galt1
Cluster316	Bcl2a1b#Cyp2c69#Cyp2j13#Lilrb4#Wfdc17#Tox2#Krt4#Gimap5#Gp49a#Efemp1
Cluster319	3110052M02Rik#Doc2g#BC052040#Nat1#Zfp101#Mcmdc2
Cluster321	A430078G23Rik#Moxd1#Rnf144a#Wnt4#Mylip#D130040H23Rik#Bmp6#Idua#P2ry1#Icosl#Chst15#Itpka#Ppp1r12b#Ppargc1b#Clec11a#Mphosph9#Tpx2#Ren1#Klk1b4#Hbb-bh1#Gm5506#Gbp8#Cd22#Egr2#Cd163#Cyp3a59#Slc43a3#Atp4a#Cmtm3#Slc7a7#Prss36#Lefty1#Celf4#Sdhaf1#Calcrl#Cenpq#Scfd2#Metrnl#Wrap53#Zbtb49#Atat1
Cluster322	2210404O07Rik#Vwa1#Rab36#5330417C22Rik#C1qtnf3#Aatk#Gm410#Gldn#Gm14139#Tmem246#Ncf1#Cyp3a44#Ccdc102a#Ptch2#Pde6c#E230025N22Rik#2310057J18Rik
Cluster323	1700016D06Rik#Sec1#Slc39a5#Mn1#Ccdc37#Fbp2#Ldb2#Pycard#Ssmem1#Mtss1l#Gpr182#Gsg2#Asb4#Rapgef5#Rarg#Hspa12a#Bahcc1#Enpp6#Eps8#B3gnt4#AB099516#Fras1#Cbfa2t3#Mmrn2#Slc16a13#Fam53b#Hist1h4k#Pth1r#Mia#Tnfaip8l3#Abi3bp
Cluster324	A330021E22Rik#Doc2a#Sema6d#Gm15114#Hbb-y#Pmp22#Fam83a#Alox8
Cluster325	Fam50b#Tmem107#Zfp873#Gm14378#Tsga10#Stab2
Cluster329	A3galt2#Col3a1#Slc22a13#Mtfr2#Atp10a#Sarm1#Lca5l#Asprv1#BC049762
Cluster330	Camk2n2#Rap1gap#Zfp57#Camk4#Esrrg#Smpd5#Zbtb8b#Nupr1l
Cluster331	Adamts2#Synpo2l#Rgs9bp#Rgs11#Celf5#B430306N03Rik#Ptpru#Hs3st6#Ercc6l
Cluster333	9930111J21Rik1#Gpr64#Zfp808#Trpc1#Eme1#Zfp493#Tex9
Cluster335	1700010I14Rik#Zfp398#Zswim1#Asic5#Dync2li1#Adc#Zfp30#Zfp341#Rgl2#A530064D06Rik#Zfp526#Anxa9#Pm20d2#AI118078#Calr3#Rslcan18#Ccdc28a#Suv39h1#Fntb#Tmco6#Homez#Zfp472#Zfp369#Katnb1#Plekhm1#Pard6a#Ptges3l#Rarb#Orai1#Map3k14#Zfp960#Zfp820#Clcn6#Tgtp1#Fancf#Smpd3#Zfp119a#2300009A05Rik
Cluster340	Ccdc103#Zfp882#Olfr1393#Pygm#Scel#Dnase1l2#Wdr78#Ccdc15
Cluster354	Car6#Vpreb1#Fbxw17#Muc13#Cyb5r2
Cluster364	4930451C15Rik#Mrc1#Rsph9#Slc2a5#Cplx2
Cluster372	1110065P20Rik#Rnf167#Narg2#Desi1#Cyp2d11#Bag4#Mospd3#Tmem129#Sult2a7#Mpg#Bscl2#Ndufaf6#Mzt2#Tspan33#Zfp560#Cyp2c37#BC029214#Itih5#Rdh16#Rdh9#Il18#Ptpn1#Gmppa#Rfc3#Abtb1#Ptprd#Gstt3#Kptn#Scnn1a#Rogdi#Insc#Ppm1m#Gmfg#Pde8a#Abcg8#Plxnb1#Gm13152#Map7#Slc45a3#Slc35b3#Lmo7#Cox11#Sh3glb2#Tapt1#Atg14#Pde9a#Ftsj1#Ocln#Fgf1#Mme#Tmem86b#Tmem14a#Mgmt#Nubpl#Fbxo31#Nr1i3#Fam214a#Ogfod3#C2cd2l#Bcor#Dnajc25#A230…
Cluster373	2010003K11Rik#Tmem39a#E2f8#Foxo3#Pitpnc1#Mcts2#Slc43a1#Slc35a4#Il1rn#Fcrl6#Kdm6b#Crygn
Cluster374	B4galt1#Fam133b#Serpina3c#Saa3#Ets2#Ppp1r15a#Mafk#Taf1d#Skil#Klf6#Mknk2#Ubap1#Rnf19b#Nabp1#3110043O21Rik#Ddit4#Gcnt2#Nucks1#Arrdc4#Slk#Tmpo#Cpne8#Cep85l#Pik3ap1#Cggbp1#Polr2c#Cirh1a#Slc10a2#Sh3glb1#Il13ra1#Dynll1#Adck4#Eaf1#Eif2d#Fam92a#2900026A02Rik#Abhd2#Hn1#Tsr1#Wdr36#Colec12#D19Ertd737e#Defb1#Ap1ar#Abi1#Gng10#Nip7#Tpd52#Mrps6#Nolc1#Tcerg1#Pdgfa#Ppap2c#Rela#Setd6#Slc30a1#Ss18#Tpst2#Wdr33#Cyp26…
Cluster375	Ccdc81#Tmc8#Ccsap#1700055N04Rik#Nudt11#Fzd9#Rprm#Cdh24#Rnase13#Aox4#Sh3gl3#Got1l1#Syt17#Gpr75#Trim69#Gtf2a1l#Zfp128#Akr1b8#Dusp13#Efcab11#Bnipl#BC107364#Meig1#Zmynd10#Zfp385c#1700009N14Rik#Myzap
Cluster376	1700040L02Rik#Xrcc3#Alx4#Ppp1r9a#Cspg5#Unc93a#Wfdc15b#Mfsd7a#Amigo1#Pnpla5#Gdf2#Ptprb#Lrat#Tfpi#Tspan15#Lrtm1#Cd4#Pnpla1#Col25a1#Sp110#Tlr12#Colec11#Cass4#Nid2#Eltd1#Drc1#Derl3#Itpkb#Star#Pcp4l1#Ikzf4#Klf2#Tmem25#Tgtp2#Kifc2#Shank2#Abcg1#Dbn1#Angpt2#Izumo4#Tctex1d4#Kdr#Sstr2#Tenm3#Ar#Pik3r5#Fcgr2b#Dcaf12l2#Tmtc2#Ms4a4d#Dennd3#Gna14#Xcr1#Ly6g6c#Neb#Olfm3#Plekho2#Rasgrp2#Spata2l#Rasgrp3#Rasip1#Wipf…
Cluster377	Pdk3#2010109I03Rik#Uhrf1#Lekr1#Slc38a1#Ttll7#Ttc25#Tspan8#Pard6g#Osbpl10#Nes#Ncapg2#Gpr137b#Pygo1#Gins3#Six5#Dpf1#Stk10#Ddr1#Cyp11b1#Zfp429#Ccdc88a#Lrp8#Zfp28#Bard1#Ckap4#Tmem74b#Apobr#Amz1#C1ql3#Cers5#Dcbld2#Gab2#Fam19a5#Hkdc1#Tspan5#Abcc1#Unc45b#Kif5c#Tspan13#Arl4c#Tchh#Akr1b7#Fbxo5#Myom1#Col11a2#Capg#Fam132b#Aldh18a1#Esm1#Fmnl3#Foxred2#Asb16#Slc7a15#Zfp142#Mcm2#Asb11#Sh2d5#Zfp697#Astn2#Cd109#D…
Cluster378	1600029D21Rik#Prrg4#Ezr#Pvr#Fastkd3#Rrp12#Adamts1#Vamp2#Tmem214#Mid1#2010111I01Rik#Tbl1xr1#Tcf12#Klhl25#Foxn2#Rnf39#Pop4#Eif2ak3#Prmt6#Phf8#Phc2#Golt1b#Rhbdf2#Oasl1#Ccdc71l#Sec61a2#Nup98#Nrip1#Nol12#Il33#Sult1e1#Spred1#Ildr2#Hbegf#Slc11a2#Dlgap4#Frmd8#Pigw#Dhx37#Nfkb2#Pdxk#Heatr1#Snx18#Cep135#Sdad1#Dhps#Fam102a#R3hcc1l#Ddx39#Ncor2#Arl14ep#Suco#Smurf1#Chsy3#Aff1#Dpp7#Polr2d#Per2#2410016O06Rik#Mett…
Cluster379	Gda#Prpf40b#Hist1h4n#Procr#Ttpal#Abcd4#Cxcl9#Tmem161b#Vasn#P2ry2
Cluster380	AI413582#Col4a1#Aimp2#Areg#Bag2#Rhoq#Psat1#Ctps#Dusp10#Nrg4#Orm3#Upp1#Mthfd2#Tagln2#Haus8#Smox#Cd14#Ier3#Uck2#Erdr1
Cluster381	4933430I17Rik#Pnoc#Ccnb2#Tdrd12#Cenpp#Sepn1#Nuf2#C86695#Dppa2#Fam109b#Nme5#Ccdc169#Pde10a#March9#Tmem236#Zpbp2#Mgst2#Map1b#Sncb#Zscan18#Matn2#Fxyd7#Nkain1#Gm136#Plcd3#Gm21119#Plac1#Gm3488#Piwil2#Gm6460#Prkcg#Apobec3#Ptprcap#H2-M9#Rltpr#Col22a1#Slco1a5#Serpinb9e#Igsf23#Dnaic2#Dtna#D830030K20Rik#Nnat#Fam3b#Lce6a#Slc35g2#Rbp7#Chrnb1#Pcolce2#1700125H20Rik#1700011L22Rik#Syde1#Dscc1#Coro2a#Tekt2#Dlx5#G…
Cluster382	Apol9b#Mff#Stard5#Ddc#N6amt2#Taco1#Dnajb1#Fra10ac1#Prkar2a#Trim25#Cgnl1#Msl3#Cldn3
Cluster383	AI317395#Pmf1#Oaf#Enpp3#Mgll#Ppap2b#Pdf#Ivd#Cpn2#Elovl3#Srd5a1#N4bp2l1#Afmid#Aldh1b1#Cpt2#Pbld2#Bbox1#Acsm5#Agtr1a#Prkd3#Mlycd#St3gal3#S1pr1#Cryl1#Deptor#Mtus1#Cxcl12
Cluster384	Chst14#Krt20#Ckmt1#Rrad#Ifnlr1#Rnf32#Kbtbd13#Ttll3#Krt17#Wdr31#Lmcd1#Usp43#Mbnl3#Zfp202#Mboat2#Trim35#Myof#Zfp532#Gm853#Lrrc14b#Vmn2r3#Fsip1#Dync2h1#Pdlim2#D10Bwg1379e#Hr#Psg22#Paqr8#Chrdl2#Pglyrp1#Gen1#1700088E04Rik#Prr5l#Gm11992#Rgs19#Anln#Shc2#Krt19#Trpm5#Zfp712#Mllt11#4930550C14Rik#Stxbp1#Vash1#Lca5#Dok5#Dctd#Duoxa2#Ninl#Neto2#Ehd2#Adamtsl5#Tbc1d9#Apbb1#Kif3c#Tmem108#Tppp3#Cnga3#Sema3b#493042…
Cluster385	Abcc9#Lmod2#C1qtnf9#Hdac7#Esco2#Cd207#Hsd3b4#Nkd1#Slc22a27#Acot3#Osbp2#Chp2
Cluster388	4632428N05Rik#Aqp7#Sgip1#Cyp2c66#E2f2#Ear11#Dll4#Bmf#Sept1#Hist1h2bf#Samsn1#Hist1h1b#Il15#Pvalb#Slc25a35#Htra1#Klf1#Slc30a8#Rgs6#Igfbp5#Serp2#H2-Aa#Pbk#Gm7092#Nrros#Gm6377#Ltb4r2#Tex40#Xkrx#Cym#Fign#Ccl3#Fxyd5#Ephb6#Dpcr1#Ugt1a7c#Wfdc1#Tff1#Akr1c21#1110017D15Rik#Cxx1c#Ccdc160#Atp8b4#Tyrobp#Cbln3#Lrrc71#Slc5a11#Car11#4933408B17Rik#Tcp10c#C2cd4d#Ackr4#Spata9#Adcy4#BC048507#Hk3#Skida1#1700057G04Rik#…
Cluster390	Atp13a4#Gm14501#Fam184b#Bend5#Lipm#Serpinb9c#Ttc12#Myh7b#Cdc7#Cdc45#Il20rb#Slc4a11#Robo1#Hsd17b1#Palb2#Gm960#Dos#Timp1#Lhfpl2#BC061237
Cluster391	Nudt2#Tex30#Slc16a6#Ern1#Tpd52l1#Stom#Shb#Bcl3#Pde4b#Ctnnbip1#Itpkc#Fst#Xdh#Dusp4#Vps37b#Ugcg#Gm129#Fbxo30#Klhl7#Tmem87b#Usp1#Lrrc8a#Jmjd1c#Cdc40#Aacs#Snx1#Ubald2#Cdk17#Nrbp2#Nup54#Sdsl#Tsc22d2#Cdk2ap2#Slc25a32#Serpina6
Cluster392	Rasl11b#Bdnf#Fam174b#Dlgap1#Zfp37
Cluster393	Ccdc96#Dmrta1#Gm4907#Gpr25#Ltk#Slamf8#Plk5#Cmklr1#Clvs1
Cluster394	Cenpn#Lrmp#Pced1b#Akr1c18#Btnl9#Maml3#Tspan2#Cd300lg#C1qtnf1#Rab3il1#Hist2h2aa1#Ifitm1#Scg2#Slc25a2#Cntfr#Prex1#Hand2#Sdc3#H2-Eb1#Rasl11a#Gucy1b3#Grem1#Gpr135#Gpihbp1#Cdc20#Dkk4#Cd83#Map3k15#Tbkbp1#Vmn2r29#Asb2#Lrrn4cl#Ushbp1#Spink5#Cpsf4l#Rsph4a#Syne4#Rims4#Il1a#2410076I21Rik#Bcl6b#Eva1b#Ecscr#Adamts7#P2ry4#Hist1h2bm#Ihh#Ptgds#Rd3#Arl9#Pydc3#Gpr174#Rab40b#Anxa1#Ptk6#Cd300lf#Mab21l2#Smad6#Plxnc1#…
Cluster395	Gm6034#Nrip3#Nipal4#Gm5108#Rgag4#Paqr4#Bmper#Zfp459
Cluster396	Atg10#Ifi30#Sh3yl1#Fbxo36#Trim12c#Rpa1#Dtx3l#Ccdc68#Gm7120#Lphn2#Orai3#Rab38#Lsm2#Cep19#Kdm5d#Exoc4#D6Wsu163e#Gpn2#Gtf3a#Cstf2t#Rtp4#Stat1#Adal#Sesn3#Capn1#Nme7#Wdr60#Fkbp15#Narfl#Gltpd1#Trim56#Mtfmt#Wdr92#Ftsj2
Cluster397	2310045N01Rik#March6#Ube2h#Tefm#Araf#9430016H08Rik#BC003965#Baiap2#Suox#Mrps24#Ddx6#Xylb#Mup6#Fam63a#Smlr1#Mrps21#Frmd4b#Rxra#Herc4#Pctp#Palmd#Pgls#Plekhb1#Plscr2#Prpf18#Psme4#Sdf2#Sgpp1#Sgta#Ttc23#Cul4a#U2af1l4#Mipep#Tmem56#Macrod1#1600002H07Rik#Lage3#Phpt1#Akr1c19#Ptcd2#Ero1lb#Pstpip2#Faah#Psmg4#Fas#Slc35a3#Abca1#Snf8#Copz2#Wipi2#Rpia#Mrpl55#Cdh2#Tex2#Gstt2#St6galnac6#Car14#Sdf2l1#Fkbp11#Tfpi2#…
Cluster398	Myo1e#Wfdc2#Gm14391#Dpy19l1#Cry2#Tifa#Il1r1#Sgms2#Rell1
Cluster399	Pias2#Hist1h2bk#Tsen15#Znrd1#Dctpp1#Ifit3#Kank2#Snapc5#Rilpl2
Cluster400	Gm10639#1700047I17Rik2#Ctgf#Ly6d#Sprr1a
Cluster401	Arl2#Mcph1#Ift140#Ccdc173#Cct6b#Dcaf4#Cdk5rap2#Nt5dc2#2210404O09Rik#Zfp759#Ptpdc1#Meis1#E130308A19Rik#2700049A03Rik#1700029J07Rik#Cenpw#Pias3
Cluster402	2610020H08Rik#Fam131c#Serpinb1a#Steap1#Cd84#Fkbp7#Sec31b#Ifi204#Chst13#Rgs10#Rasl2-9#Clec4f#Ccrl2#Eri2#Dact1#AA415398#Tsacc#Ccdc85c
Cluster403	Nop56#Ybx3#Fkbp5#Pfkl#Rras2#Gsta1#Tmsb10#Orm2#Bin1#S100a11
Cluster404	Amacr#Abat#Sirt3#Nlrp6#Lect2#Shmt1#Gm4952#Acsm3#Sema4g#Rapgef4#Spc24#Oat#Scrn2#Atp11c
Cluster405	Ccdc64#Nek5#Sept8#Klf5#Serpinb9g#Arntl2#Selm#Lce1g#Rwdd2a#Pqlc3#Pou2f3#Osbpl3#Grip1#Cd8a#Adam12#Stmn4#Ccdc109b#Col9a3#Sybu#C1qtnf6#BC055324#B3galnt1#4930467E23Rik#Epb4.1l4a#4930538K18Rik#Rragb#1600014C23Rik#Maats1#Tnfsf13#Sfxn4#4933402N22Rik#Tbx10#Lipn#Avil#Kifc1#Stk30#Tnfaip8l2#Klhdc1#Ifnk#Styxl1#Xxylt1#Lpcat2#Dppa5a#Ear1#Fbxw20#Aloxe3#Ppp1r27#Gm17019#Pfkfb4#Fgd3#Eid2#Ccbe1#Zfp940#Slc25a53#Fbxo10
Cluster406	Cmtm7#Dpysl2#Unc13a#Satb2#Pax9#1700025G04Rik#Dnal1#Fezf1#Fam129a#Cyp2s1#Duox2#Kbtbd11#Rab33a#Pdxp#Chst12#Ovol1#Grin2b#Lamc2#Sema3e#Prkcdbp#Acot6#Lrrc1#Tmem136#St8sia3#Coro6#Pmepa1#Ccdc8#Myo9a#Zfp90#Wnt9a#Mapk4#Pask#Fhod3#Myo16#Zc2hc1a#Vil1#Myl9#Enkd1#Enah#Eif5a2#Dysf#Mansc1#Rcor2#Fbxl8#Bbs12#Syt11#Spdl1#Mboat4#Ccdc112#Endod1#Fignl1#Filip1l#Gm4980#Gpnmb#Clip2#Sacs#Slc27a3#Crct1#Arhgap27#Olfml2b#Rc…
Cluster407	Amica1#Sod3#Cdca3#Ccno#Gpr12#Acsl6#Tfec#Sp100#Kcnt2#Ifi203#Rfx4#Stap1#Ifi27l2a#Ccdc80#Fam222a#Mtnr1a#Zfp618#Fam26f#Hsd17b3#1810046K07Rik#4930544G11Rik#Prss53#Rtn4rl1#Clec14a#Dnase1l3#Csf2rb#Zyg11a#Gas7#Fam89a#Abca9#Ltbp4#Wnk4#Prok1#Clca1#Npl#Celsr1#Gas1#Cebpe#Lect1#Serpina9#Socs1#Col13a1#Lhfp#Tgfbi#Srms#Col14a1#Gm9992#Gcsam#Fam167b#Gm6614#Ntn3#Ppp1r14c#Gngt2#Cyp46a1
Cluster416	Bhlha15#Itgb3#Eml1#Leprel1#Pkmyt1#Cxcr4#Cyyr1
Cluster423	Fam171a1#Prob1#Adamts10#Zfp362#Serpina3i
Cluster430	4930513O06Rik#B230216G23Rik#Slc39a2#Spef1#Cabp7#6030498E09Rik#Tnni3#Opalin#Akap14#Bmp7#Dcdc2a#C1qtnf2#Iqcd#Spns3#St6galnac3#Hs3st4#Stard6#Apol11b#Slc35f1#Ceacam19#Plxna3#Gm14479#Lrfn4#Tgm7#Tlr13#Cndp1#Pax1#Gm14477#Nxpe5#Gm14476#Prdm11#Gm14475#Fam154b#Cd5#Mns1#Zfp811#Tex29#Cpne7#Ptpn18#Ccl22#Maml2#Selp#Trim38#Crlf1#Rag2#Fgf23#Prkg1#Fermt1#Olfr96#2810417H13Rik#BC028528#Clec12a#Wisp3#Vtcn1#Mcam#Ndc8…
Cluster431	Pck1#Aox3#Slc27a2#Elovl2#Hamp#Ccbl1#Gadd45g#Slco1b2#Aldh8a1#0610011F06Rik#Dnajc15#AI182371#Ift20#Qsox1#Got1#Hmgcs2#Paics#Phb#Hsd17b10#8430408G22Rik#Gpt#Ces1d#Zfp36l1#Cyp2c29#Tpmt#Cyc1#Gyk#Rcl1#Ier2#Abcd3#Upb1#Cyb5r3#H2-Ke6#Ces3b#Uqcr10#Mrps18c#Tstd1#Ctsh#Hagh#Pecr#Idh1#Acat3#Ufc1#Cth#Hint2#Cfhr1#Vkorc1#Mettl9#Ugt2b36#Csnk2b#Ndufa13#Pemt#Hoga1#Adtrp#Ugt2b38#Me1#Ndufa9#Decr1#Ttc36#Mcee#Ttc39c#Crot#…
Cluster432	Ppil6#Slc43a2#Prickle3#Lrrc51#Txndc16#Zfhx4#Macrod2#POU6F1#Nudt6#Tceal1#Vegfc#Pfn4#1110034G24Rik#Capsl#Tfeb#Lgals4#Dyrk1b#Cenpl#Psme2b
Cluster433	Bex4#Olfm2#Nap1l3#Rom1#Krba1#Cldn5#Pcolce#Arhgdib#Prkch#Itga4#Prrg3#Jam2#Slc16a5#Klb#Slc1a2#Mcc#Slc13a2#Arap3#Per3#Notum#Id4#Bgn#Cd3d#Cyp4b1#Eln#Fndc5#Gmpr#Sox6#6430573F11Rik#Tle2#Fitm1#Ttc30b#Adam23#Syt1#Plvap#Nxpe2#Bmp2#Rgs3#Cerkl#Lrrc32#Slc25a29#Sipa1l2#Lag3#Slc15a5#Cd55#Mfsd7c#Tcf7#Slco1a4#Mapk15#Slc5a1#Amigo2#Slc1a7#Fmn2#Tmem88#Cib2
Cluster434	Agfg1#TMEM185B#Mterfd1#Lgmn#Vasp#Tpd52l2#Khdrbs3#Tceb3#Cdc42se1#Acot9#Parn#Lsm3#R3hcc1#Map4#Rad17#Actn1#Scamp3#Mapre3#Scaf11#Cstf2#Spg21#Mfge8#Tbcb#Atp6ap1#Xpo1#Atp6v1a#Wdr73#Csnk1g2#Stk38l#Mtmr2#Vat1#Khdrbs1#Nup88#Hat1#Fnip1#Eid1#Arfip1#Nupl1#Hnrnpl#Hn1l#2310044G17Rik#1200014J11Rik#Spns1#Slco2a1#Crebl2#Myh10#Trib3#Bcap29#Kansl2#Rbm45#Papd4#Hspb1#Pde4dip#Hiat1#Josd2#Ptbp3#Oser1#Iars#Cln5#Rab35#Pg…
Cluster435	Acrbp#Prelp#Zfp93#Magee1#Abhd15#Plgrkt#1700109H08Rik#Eno3#Zfp955b#Abhd8#1110051M20Rik#Rad9b
Cluster436	E130012A19Rik#Rgmb#Zfp169#Sirt6#Ncapd2#Prmt2#Zfp442#Fhl3#Paqr3#Bbs2#Trim30d#Plekhg2#Zfp428#Zfp574#Ufsp1#Tprn#Zscan22#Fbxo17#Lrrc20
Cluster437	Bdh1#G6pc#Hes6#Serpind1#Hsd3b5#Akr1c20#Adck3#Amdhd1#Dpys#Hgd#Acad11#Cmtm6#Smarca2#Apol7a#Mmd#Agpat2#Paqr9#Acat1#Apon#Txnip#Fmo5#Akr1c14#Csad#Fasn#Etnppl#Acsl1#Inmt#Fos
Cluster438	Mipol1#Atp5s#Zfp408#Nup62cl#Gtpbp3#Jrkl#Lrwd1#Synb#Dus4l#Sox13#Rbbp8
Cluster439	4430402I18Rik#Pbx3#Colec10#Slc17a1#Olfr1034#Kcp#Dsg1c#Eng#Gcnt4#Pdilt#Was#Lrit1#Cyp4a32#Cpeb3#Zfp300#Smyd1#4932414N04Rik#Gpx7#Klhl13#Bmp4#Sytl4#Cyb561d2#Gata4#Ankrd44#Adrb3#Il11#Pecam1#Sept5#Mtmr7#Ccnf#Aplp1#Fam83f#Pde6h#Gfod1#Pi15#Atp6v0d2#Swsap1#Tbx3#Klhdc7a#Gnat1#Pag1#Gnb1l#Rpusd1#Arhgef9#Syp#Tmem200b#Lix1#Grm8#Sox5#Aqp4#Syt3#Bmp5#Capn3#Dclk3#Fam184a#Slco6c1#Cx3cr1#Bbs1#Smoc2#Apold1
Cluster440	Cachd1#Olfr701#Efhc2#Ppapdc3#Zmynd15#Sez6l2#Clstn1#Serpinb9f#Figf
Cluster441	2010001E11Rik#Wdr76#Gpr157#Bbs10#Tnfrsf22#Morn4#Hist2h3c1#Hcls1#Zc3h6#Zdhhc1#Sh2d3c
Cluster442	Dnaaf3#Ttyh1#Gm5431#Calca#Lama4#Lpar3#Kif15#Atp1b2#Zkscan4#Rpl39l
Cluster443	Dusp9#Tgfbr3#Ephb2#Armcx4#Crx#Oscp1#Mest#Arhgap31#Zfp94
Cluster444	Cep170b#Tpm2#Mthfd1l#Mcm6#Vim#P4ha2#Kif3a#Cldn4#Akap12#Ccl2#Cdc42ep5#Asns#Fmnl2#Cd68#Morc4#Pea15a#Pfkp#Gml#Ndrg1#Nid1#Sccpdh#Lims1#Flna#Vldlr
Cluster445	Ing4#Mterfd3#Elmod3#Stx2#Hexim1#Zbtb44#Pura#Pxmp4#Psg23#Tmie#Wrap73#Inhbe#Sphk2#Gpsm2#Slc35e2#Sh2d4a#Pex1#1110008L16Rik#Tesk2#Itpr2#Tiam2#Stag1#Socs2#Smpd2#Slc2a9#Slc12a7#Sipa1l1#Itsn1#Tcirg1#Siae#Acox3#Thtpa#Agl#Htra2#Snx25#Shpk#Fig4#Fhit#Fgfr2#Rnpep#Rmnd1#Rmi1#Rft1#Rfc4#Adora1#Letmd1#Timm22#Acad9#Lhpp#Thra#Acad10#Inpp1#Tbc1d7#Fdxr#Fchsd2#Farp2#Extl3#Nudt13#Hif1an#Nudt12#Plekhg6#Rexo1#Abcd2#Lman…
Cluster446	Efna3#Rhov#S100a3#Tead4#Prdm1#Igsf1
Cluster447	Mapk11#Arhgap19#Rep15#Hck#Tlr6#Ptpn7
Cluster448	Carns1#Zfp454#Vmo1#Zfp273#Ell3#Gm1045
Cluster449	H2-DMa#Slc29a3#Capn11#Srl#Fam212b#Trim65#Pih1d2
Cluster451	2010015L04Rik#Zc4h2#Timeless#9430015G10Rik#Agtrap#Psd4#Trim12a#3110062M04Rik#Gm4767#Pcdhga9#Cntln#Tctn1#Otub2#1700009P17Rik#Trim34b#Tnfrsf14#Ift122#Cfp#Slfn2#Camkmt#Aoc2#Pitpnm1#Bcl2l12#1600016N20Rik#Snx21#Zranb3#Lrp11#Ankrd9
Cluster452	Dsn1#Lin52#Phf7#Alg12#2310009B15Rik#Kbtbd3#Proca1#Odf3b#Chrm3#Omd#Tmem17#Ly6i#Psma8#Isoc2b#Wdfy2#Rab13
Cluster453	Gprin3#Rpusd3#Mgst3#Tlr2#Sco1#Rxrg#Rnf186#Il17rc#Slc34a2
Cluster454	Adamts9#Slc6a18#Mei4#Itgae#Cdc42ep3#H1fx#Tdh#Gpr4#Rgcc#Mypop#Zeb2#Far2#Myl4
Cluster455	Agps#Pskh1#Flywch1#Zfp322a#Frs2#Zfp260#Ivl#Vps8#Tmem106a#Cklf#Traf3ip1#Zscan26#Kifap3#Ptgfrn#Pard6b#Nkap#Rasa2#Rbm41#Stx3#Samd9l#Ddx59#Wdsub1#Cep104#Arhgef18#Zfp292#Mfsd7b#Zfp930#Cyb561a3#Ubtd2#Usp36#Ube2o#Tspan7#Traf3#Tmem2#Tmem140#Cc2d1a#Tldc1#B630005N14Rik#Cln3#Zfp397#Brf2#Fam84b#Scamp5#Porcn#Rprd1b#Ankle2#Kctd17#Zfp280b#Cask#Esyt1#Nup153#Osgin2#Rusc1#Ankib1#Arntl#Zfp386#Dctn4#Fam83h#Nsun3#Pol…
Cluster456	Casz1#Usp49#3632451O06Rik#Mastl#Filip1#Dram1#Fam228a#Pacrg#Ccdc146
Cluster457	4930503L19Rik#Tgm4#Gm684#Mutyh#Rsph1#Mms22l#Fam71f2#Ube2t#Myo5c
Cluster458	AU021092#Nat14#Nodal#Arc#Aldoart2#Cyth4#Eddm3b#Tmem91#Mmp21#Lst1#Tmod4#Vsig2#Msh5#4933417A18Rik#Skint7#Rtn2#Klrk1#Klk14#Scgb1c1#Smco2#Laptm5#Cdh15#Eda#Gpr132#Nfe2l3#Apod#Nrtn#Coro2b#Tff2#Psg25#Ifi205#Hist2h2bb#Olfr376#C1rb#Ccdc67#Fam71a#Batf#AF366264#Fcgr3#Cd86#Fam211a#1700113H08Rik#Clmp#Klhl6#Postn
Cluster459	Ankle1#Cdk5r1#Gprc5b#Gpr21#Kit#Spag5#Olfr1032#Kazn#Eps8l1#Fam19a2#Msantd1#Zcchc3#Zkscan16#Myo1f#Ccdc116#Fank1#Fcgr4#Fgfbp1#Mfap4#Trex2#Zdhhc23#Mpo#Creb3l4#Tnfrsf13b#Tceal6#Mak#Ankrd13d#Gata3#Lpxn#Slco1a6#Tmem178b#Mamstr#Cnrip1#Spink10#Speer4c#L3mbtl1#Kcnab1#Rac2#Relt#Kcng3#Gsdma#Hey2#Acap1#Garnl3#Bglap3#Dok1#Mylk4#Tyro3#Dlec1#Cyp2j8#Chrna5#Pnma1#Rap1gap2#Igf1r#AA467197#1700030J22Rik#B4galnt2#Gnaz…
Cluster460	Hilpda#Srxn1#Otud1#Ero1l#Rrm2#Cd63#Ppl#Iffo2#Btg3#Bcl2l1#Tubb6#Bcmo1#Hmox1
Cluster461	Aim1#Il17ra#Sox9#Icam1#Tsc22d1#Abcb7#Igfals#Tfpt#Upf3b#Minpp1#Ift52#Hhex#Ankrd46#Akap1#Gtl3#Wwc1#Slc25a33#Rbpms2#Ciao1#Pvrl2#Hs3st3b1#Pithd1#Rufy1#Ifih1#Ip6k2#Sirt7#Acnat2#Slc41a2#Ireb2#Slc40a1#Irf1#Sec23a#Raf1#Prr16#Irf6#Slc35d2#Lmbrd1#Stk16#Prpsap1#Ppp6r3#Ppp1r37#Pigk#Phf14#Pde3b#Habp4#H2afv#Gusb#Hsdl2#Rnft1#Glyctk#Coq2#Tbcel#Cpox#Slc30a5#Aspscr1#Timmdc1#Mapk14#Tial1#Prkra#Pcbd2#Pbld1#Gramd3#G6…
Cluster462	Amd2#Crisp2#Shox2#Trpv1#Mum1l1#Dapp1#Hist1h3e#Themis#Hist1h2bh#Enkur
Cluster463	Cyp2c50#Aamdc#Gbp11#Keg1#Timd2#Hsd3b3#Enpp2
Cluster464	Apbb3#Tm2d1#Ube2f#Slc39a14#Srsf2#Ndfip2#Dpm1#Hamp2#Atp5g2#Gm2382#Ly96#Fxyd1#Cited2
Cluster465	Dtx3#Klhdc8b#Slc22a15#Fhod1#Ak7#Ccl27a#Sdpr#Arhgap24#Sult1c2#Tmem198b#Acot1#Irf8#Pradc1#Tnfaip2
Cluster466	Ackr2#Hdc#Hist1h2bg#Itprip#Rps6ka2#Olfr56#Fli1#Spry2#Ptafr#Fermt3
Cluster467	Aldh3b1#Cenpo#Zfp939#Morn1#Lrp2bp#Zbtb37#Sgce#Armc9#Cphx2#Tshz2#Zfp235#Mthfd2l#Capn12#Tacc3#Ms4a6c#Gm14305#Fbxo44#Spice1#1110008J03Rik#Ocel1#Gba2#Bach2
Cluster468	5430435G22Rik#Tanc2#Tox#Atxn7l2#Ccdc88c#Ptpre#Ackr3#Slc7a1#Spin4#Inhbb#Chaf1b#Nt5e#Runx1#Sh3d21#Pip4k2a#Pdp1#Pcbp3#D8Ertd82e#P2rx5#Osmr#Barx2#Pmaip1#Afp#Srgap3#Cd274#Loxl4#Smtnl2#Tgfb2#Csf2ra#Slc7a6#Abcb1a#Sgcb#Fam110c#Bmp8b#Ppm1h#Epcam#Reln#Fchsd1#Rin1#Fjx1#Rragd#Arrb1#Tmem154#Ttc26#Lif#Arv1#Trib2#Tmod1#Kbtbd8#Ap5b1#Plat#Cdr2#St14#Arhgap36#Tnfrsf21#Zfp418#Msantd3#Pold1#Plekhh1#Piezo1#Oxct2b#Osbp…
Cluster469	6430571L13Rik#Trim62#Lrrc69#Pde1b#Retn#Bmp10#Dcdc2b#Atp2b4#Slc26a4#Sh3gl2#Mogat1#Cers4#Rtn4rl2#Ifitm5#Rnf138rt1#Rdh19#Lefty2#Emr1#Gm11744#Dzip1#Dsg1b#Gpsm3#Gnb4#Klra17#Ska1#Serinc4#Col5a2#Gm6904#Cd48#2310002J15Rik#Slc26a10#AB124611#1700019D03Rik#Cela2a#Hmha1#Lgi4#Klhdc8a#Plek#Phkg1
Cluster470	Ccna2#Vmn2r46#Lor#1700008O03Rik#Pde1a#Arhgdig#Scin#Slc28a3#Coch#Cfd#Prr7#Folr2#Glrp1#Hist1h2br#Radil#Bhlhe22#Btnl2#Hpcal4#Rnf208#Svop#Lrrk2#Agap2#B4galt4#Adra2a#Parp8#Gm5796#Comp#Tacstd2#Sema4d#Armcx2#Mmp27#Tlr9#Slc37a2#Klrb1c#Pcp4#Cd79b#Nos2#Gm10696#Mfng#Tmem169#Sult2a1#Ctsj#Mobp#Tmem116#Tmprss11d#Mis18bp1#Fgf7#Fam46b#Ddx43#AY074887#D630023F18Rik#Aldh3a1#Myo1h#Zfp575#Ubxn11#Atp6ap1l#Dmrt2#Ctbp2#…
Cluster471	2210016L21Rik#Zbtb33#Vac14#Cyp17a1#Gbp7#Sh3bgrl3#Ap1s3#Slc7a11#Hdac8#Snrnp25#Cdc42bpg#Spata13#Nup107#Eda2r#Ddit4l#Neurl3#Oas1a#Hsf1#Ucp2#Ubd#4930546H06Rik#Ppp1r42#Ccdc34#Nt5c3b#Fhad1#Adar#Gipc2#Trim21#Foxp1#Ccdc130#Camk2d#Large#Zfp568#Xaf1#Cmpk2#Pygb#Gbp3#Ift57#Rnf215#Tuba1a#Impa2#Hirip3#Prmt7#Coprs#Ttll1#Zbp1#Lig1#Cxcl16#Trex1#9230110C19Rik#Acta1
Cluster472	4930486L24Rik#Syt15#Phyhip#B4galnt4#Efna2#Phf11a#Olfr212#Dppa1#Rad51ap1#Ccdc88b#Dkk1#Sema7a#Gpr35#Dll3#Dnali1#Il17d#Slc7a4#Sgpp2#Ifnb1#Lmod3#Tbc1d2#Sprr2i#Kcnj5#Ms4a6d#Ttll11#Sprr2f#Klhl10#Sftpd#Glp2r#Sbp#Ccr2#Psg29#Gal3st3#Pgpep1l#Ccdc79#Medag#Sytl2#Twist1#Cts8#Nxph4#Fcrl1#Mill2#Tmem79#Tgm3#Ctcfl#Gng2#Slc6a20b#Mdk#Elfn1#Dok3#Egf#Rad54b#Ccdc17#Chst7#Efhc1#Dnd1
Cluster475	Cep112#Tspan6#Ttc16#Fam129c#Chek1
Cluster476	Ccdc152#Micall2#Zfp658#Gm5640#Ddah2
Cluster477	Cnn2#Gtse1#Gm20736#P2rx7#Fam117a
Cluster478	9130023H24Rik#Sh2b2#Acvr2b#Zfp780b#Zfp607#Jazf1#Ttc30a1
Cluster479	Cd34#Fam189a2#Fgd1#Angptl1#Ntf5
Cluster480	4933427D14Rik#Fstl3#Zfp329#Myo7a#Mrm1#Rab11fip5#Plcxd1#Mex3d#Lynx1#Rgs7#Tmed8#Meox1#Atad5#Tmem194b#Arid3b#Fam110b#Fzd3#Zik1#Tmem158
Cluster485	Ctxn1#Snca#Sp4#Mettl21e#Fibin
Cluster486	Ccl4#Rnf17#Prrg1#Sox17#Gm12185#Fut1#Mxra7
Cluster487	Abca7#Strada#Gltscr1#Zfp438#Nexn#Plxnd1#Skp2#Nbeal2#Tmem163#Fv1#Dynlt1a#Rab27a#Smyd4#Stk39#Cln6#Zfp846#Zfp40#Taf6l#Zfp775#Pcyox1l#2410018M08Rik#Pak1#Ahi1
Cluster488	Gpr19#St3gal2#Pde4a#Neil2#Slamf9#Kif9#Pms2
Cluster490	Gm4791#Oip5#Mrap2#Vax2#Misp
Cluster492	1700012L04Rik#Gm15319#Cend1#Gm3383#Irx2#Kazald1#Kcnv2#Phyhipl#Kif5a#Dok7#Brca2
Cluster500	Npy#Serpina3b#Slc35e4#9830147E19Rik#Plagl2
Cluster501	1700023E05Rik#Phf21b#Rasl10b#Wtip#Mmp3#9930111J21Rik2#DXBay18#Ly6k#Ttc18#Slc38a5#Jsrp1#Slc5a4b#Gpr111#Rtn4r#Gm21953#Rasl10a#Gm21586#Ctsw#Wfdc10#Serpina3a#Asic3#Psg18#Emp3#Psg21#Tfap2a#Zmynd12#Clec9a#Icam2#Reg3b
Cluster502	Cml5#Msmp#Zfhx2#Igflr1#Cpt1b
Cluster512	Ccm2l#Krt10#Klhl3#Tert#Letm2
Cluster528	Glis3#Nefm#Rxfp3#Tomt#Tnfrsf9#Nmb
Cluster533	2610015P09Rik#Rassf6#Rnpc3#Foxa2#Atoh8
Cluster535	2310003H01Rik#Cpne2#Foxp4#Nos1ap#5830415F09Rik#Tmsb15b1#2410002F23Rik#Fbxo7#Mbip#Lysmd2#Alkbh1#Alg13#Acot8#Prr5#Zfp212#Mier3#Ctf2#Zbtb20#Fbxl15#Nsmaf#Alyref#Rbm12#Abhd10#Bud13#Enpp1#Fam219b#Rhbdd2#Cdk6#Mast3#Slc13a5#Rest#Kctd15#Znrf1
Cluster536	BC035044#Rgs9#Pla2g2d#Tmem139#Gm13212#Rtkn2#Adh6a#Cyp2b9#Wdr63#Soat1#Luzp4#Fmo3#Ccnjl#Itgb2#Rpgrip1#Rex2#Cited4#Ppp1r32#Hcst#Clec4a1#Rcan2#Rcsd1#Arhgap8#Lingo1#Pvrl4#Pamr1#Il17re#Pf4#Grpr#Grasp#Cdx4#Fgl2#Cdkn3#Gm5150#Gm4745#Ermn#Anks6#Gm15093#Gm13154#Lrrc10#Rassf9#Tifab#Crip1#Dse#Gata5#Npb#Cldnd2
Cluster537	Abcc4#Ftmt#Eml6#2610018G03Rik#Rasl12#Hmga1-rs1#Satb1#4930539E08Rik#4921536K21Rik#Tbx20#7530416G11Rik#Nbea#Eno2#Tead2#Kremen2#Zfp365#Mypn#Pmel#Gpc5#Diras2#Ttbk1#Actg2#Zfp773#Cyp1a1#Oas1h#Frmd3#Cckar#Zfp462#Mst1r#Ubtfl1#Mvb12b#Ncf4#Ephx4#Baiap3#Txk#Ms4a15#Ppm1e#Gpm6a#Dnah5#Apba2#Zfp92#Mmp2#P2rx3#Gabrb3#Rtn1#Hoxb7#9330159F19Rik#Zfp619#Atp10b#Neurog2#Fam69c#Sorl1#Itgam#Abca14#Rab3c#Nlrp4a#Epsti1#Tcte…
Cluster538	Cd200r1#Rttn#Zfp458#Xlr3c#Neurl1a#Trim72#Wdr16#Gjb4#Amy2a4#Axl#Krt7#Notch4#Rab39#Mmp12#Amy2a5#Hus1b#Amy2a3#Amy2a2#Meox2#Spag4#Lrrc49#Chtf18#Plekhn1
Cluster539	Arhgef2#Pmm1#Rab31#Hk2#Kif21b#Elovl7#Hk1#Syt12#Slc7a5
Cluster540	Athl1#Zfyve1#Unc93b1#Leprotl1#Smagp#Maf1#Ugt2b35#Smim22#Slc39a8#Eepd1#Tmem179b#Tipin#Atg16l2#Trappc6a#Gm5918#Shroom1
Cluster541	Awat2#Fancm#Ncald#Zfp608#Ly6c1#Metrn#Zbtb12#Pkhd1#Pdgfc#Gpr56
Cluster542	Bin2#Fam83d#Emilin1#D130043K22Rik#Hcrtr2#St3gal6#Rgs1#Wls#Clic5#Lilra5#Sh3tc1#Nlrc3
Cluster543	Cxcl15#Trim46#Oit1#Irx3#Hist1h2ac#Gpx3#Zfp296#Gja6#C77370#Fgfbp3
Cluster544	Fancg#Cd46#Zfp456#Elk3#Kif20a#Pkn3#Plac9b#Hexim2
Cluster545	Cenph#Gm766#Dpysl3#2810408A11Rik#Bcl2a1a#Fam209#Ccdc89#Igj#Smarcd3#Tnfrsf26#Acbd7#Sstr4#Hbb-bt#Slc22a3#Abra#Lingo4#Tmem252#Tmigd1#Clec4n#Smok3a#Gpx8#Rab19#Gpr151#Prss22#Gpc3#Pira2#Cdk15#Mas1#Vsx2#Tmem52#Limch1#Gm5294#Cd209b#Glod5#Gfpt2#Gab3#Ccl19#Dusp2#1700001P01Rik#Amotl1#B3gnt3#Lrrc25#Timd4#Gpr162#Col1a2#BC016579#Lrfn1#Sema5b#Exoc3l#Pld4#Fabp7#Them5#Darc#She#Lum#Npr1#Gulp1#Casp12#Grap
Cluster546	Evi5l#Zbtb45#Zfp866#Zfp59#Tmem245#Naip5#Zfp13#Sema4f#Aldh1l2#Tctn3#Fut11#Zfp282#Acot2#Zfp516#Vamp1#Cenpt#Zfp7#BC022687#Bora#Smtn#Pus7l#Dok4#9130019O22Rik#A2m#Phc1#Tmem238#Spag1#B9d1#Zfp935#Ccl6#Slc5a6#Taf1c#Nek3#Hist1h4h
Cluster547	Csn3#Mlph#1700112E06Rik#E030018B13Rik#Kcne4#Mettl7a3#Soga3#Olfr536#Lhfpl4#Trim36#Optc
Cluster548	Catsperd#Noxa1#Il10ra#Sla#Cd28#Parpbp#Ramp2#8430427H17Rik#Chrm1#Slc7a8#Vmn1r53#Atp1a2#Sema3f#Arhgef39#A530032D15Rik#Ttc39d#Ctrl#Angpt4#Ptger1#Nr1h5#Gprin2#Esyt3#Defb8#Slc35f2#Clhc1#Apol6#Xlr3b#Mef2b#Bsph2#Ptprm#Nsl1#Hdx#Foxg1#Fsbp#Casc5#Ccdc18#Tmem47#Mchr1#Gdf10#Ramp3#Heyl#Hist1h4d#Nxnl2#Nyx#Ret#S100a7a#Serpine3#Uts2#Lrrc73#Wdr38#Lrrc66#Ttk#Col17a1#Tcf15#Cnfn#Srgap1#Kctd12b#Sncaip#Iqck#Wnt5a#Arhg…
Cluster549	Akap5#Slc25a45#Stard8#Gem#Sertad4#Rab3a#Aph1c#Cox7a1#Tinagl1#Tle6#Birc5

## Sheet: lineage specification (Xie et a
Cluster74	AC017002.1#HAND2-AS1#SELP#SP140L#CES1#NKX3-2#CPED1#RARRES3#GABRA2#AHNAK2#NOV#ZNF469#AGAP2-AS1#RASGRP3#GBP1#SDPR#PAG1#CTD-3064M3.3#RENBP#GMFG#ANGPT1#PDCD1LG2#XAF1#CLIP4#RP11-20I20.4#GPR20#WFDC1#INSC#AC135048.13#DNM3OS#RP11-340F14.5#KLF9#BTN3A3#PLD1#TLR4#HOXC9#AK5#LRRC8C#VDR#INMT#ALDH3B1#FAM196B#RP11-838N2.4#APOL1#CD68#PTGER2#FLT3LG#APOL6#PTGIR#TYRP1#IL31RA#AREG#KLHL14#TNFRSF6B#IL1RL1#ARHGAP6#ELTD1…
Cluster99	A2M-AS1#ABCA5#HFE#ABCB1#GALNT5#SAA1#GRIP2#SNORA2#MAP3K5#CSPG4P12#GPR1#SNPH#C3AR1#RP11-137L10.6#CATSPER1#RP11-645C24.5#GLIPR1L2#SDSL#PARD3B#LINC00087#BCRP3#GRK4#SNED1#EMCN#RP11-420G6.4#FGF5#RP4-791M13.3#GPBAR1#SLC30A4#NPAS3#LCNL1#AC253572.2#HECW1#SSPN#STAR#HERC3#EPHX4#RP11-425I13.3#ISLR#WHAMMP2#ZBTB47#ITPR1#AC009469.1#PLA2R1#EREG#RP11-422J8.1#CCDC178#RP11-792D21.2#GPRIN3#SH3RF3-AS1#NFIA#KIFC3#ADAM…
Cluster100	ABCA3#TBC1D31#MAPK4#BRIP1#RAPGEFL1#RASL10A#CCDC18#SLITRK3#OCLN#CR753846.2#ASIC3#UBL7-AS1#UTF1#CEP72#AC034193.5#RP11-91G21.1#ADCY2#TMEM178B#LIN7A#HRASLS5#WDR62#ZNF100#HS3ST4#RP11-142I20.1#RP11-181G12.2#GAL3ST1#SPATA5#NOD1#BRCA2#PCDHB16#CASC5#SCARNA13#GSG2#TMEM170B#KLK10#GNAQP1#THAP9#RP11-355O1.11#RP11-390F4.6#GALNT13#SORL1#NANOS1#BRCA1#PASK#KCNQ4#ZNF670#ZNF418#KDM2B#CEP128#USP2#VN1R82P#HESX1#KIF5A…
Cluster101	ABHD14B#C19orf33#PPFIBP2#PLEKHA8P1#ANG#LINC00882#TMEM37#ARHGEF35#RP11-1149O23.2#RP11-10O22.1#AC135776.1#MBP#SYNJ2#GALNT3#RBMS3#DSEL#AC225613.1#MYO1D#SRGAP1#ADAMTS10#NEAT1#AMIGO3#NT5DC3#SNORA67#FES#PCBD2#CTB-25J19.9#PIGW#SLCO4C1#ZNF570#KIAA1244#TRADD#ADCY8#CTD-3092A11.2#HIVEP2#VPS13B#TRMT61A#HERC6#SGK3#CA12#TRIM26#GPR83#KMT2A#TMEM154#GLI1#RP11-264B17.4#RP11-23P13.6#BCAN#MIR3179-3#SWSAP1#CCNE2#PRSS…
Cluster102	AAED1#RMDN3#SERTAD4-AS1#NAP1L5#MICA#C2orf76#RBL2#PIK3IP1#MARCH8#PPP3CC#PRKACB#CNRIP1#ZFP64#TRIM41#IFFO1#MAPRE3#NFKBIZ#FYCO1#SMIM1#MAP3K12#CIDECP#TRIM32#TNFSF12#CISD3#FBXO38#SLC35D1#MEIS3P1#LEPREL4#C9orf85#RP11-626G11.3#PCGF1#DECR2#DPP8#PTPRJ#IBTK#TRAPPC2#TRIM3#IFIT5#DCHS1#NCR3LG1#AFAP1#TUSC1#TSHZ3#IL17RA#L3MBTL3#ARHGEF26-AS1#SOBP#FAS#SLC25A43#MMP11#DAAM2#ACP5#RP11-395G23.3#PIGB#CYB561A3#PRKCA#PRK…
Cluster103	AC005003.1#PREX2#PRKCG#PNMA3#DMRTA1#SERPINA5#FUT1#P2RX5#CTD-2126E3.4#SLC24A5#ARHGAP4#NHS#CTA-250D10.23#STEAP2#GLYATL1#MIR600HG#BAI1#HLA-DOA#UNC5A#VEPH1#CHAC2#MAP4K1#AC012215.1#SYT3#GRM2#PRRG3#DPPA2#AC140481.7#THAP10#ARTN#RMST#RIPPLY3#AL162431.1#TERT#ART5#RP11-169K16.9#RP11-168O16.1#SEC14L4#FOXJ1#PDE1B#RP11-263K19.4#RP11-199F11.2#SCN4A#ARHGAP26#PACSIN1#RP11-196G18.23#RP11-175P13.3#IRAK1BP1#ZNF239#…
Cluster104	ABLIM2#RP11-319F12.2#PDZK1#P2RY2#ERICH1-AS1#RP11-466P24.2#C10orf95#RP11-178C3.1#RP11-180P8.3#MIR181A2HG#CACNA1C#RP11-463D19.2#AP000769.1#RP11-446E9.2#BTK#RLBP1#RN7SL810P#MICALCL#CACNA2D3#RP11-506E9.3#COL6A6#ZNF564#RP11-611O2.2#BLNK#DIO2#OR2W3#AC110619.2#ZNRF2P2#ZNF790#BACE2-IT1#FAM83H-AS1#RP11-54O7.3#BIRC7#LY6G6C#PGLYRP4#CASQ2#RP11-736N17.4#CAPN12#RP11-588K22.2#CTD-2203K17.1#NPPC#FANK1#RP11-7F17.…
Cluster105	ACHE#PRSS16#PPAP2C#PMEPA1#CORO2A#VSIG10#GPR64#LHFPL2#LMTK2#RGL3#ENPP1#MMP17#WDR4#GNA14#NAV2#NDRG2#RAP1GAP2#C6orf132#NFXL1#TRAF3IP2#CCRN4L#NR2C2AP#OMA1#PAXIP1#PCDH1#STAP2#FSIP2#PDK1#PFAS#PLAC9#IQGAP2#ZNF525#VLDLR#ATP2A3#SOWAHC#FERMT1#SOCS2#CBR3#RRP12#FAM157C#RAB20#EEF1A2
Cluster106	ABHD15#DNAJC22#PPP1R3D#PINK1-AS#C19orf18#SLC41A2#FAM47E-STBD1#SZT2#AC006547.13#TNFAIP6#ADCY7#MMP28#DENND3#AC217779.2#KCNQ5#ZNF818P#ZNF524#JPH2#HSPB7#WNT5A-AS1#WNT4#ATOH8#TMEM106A#AC002398.9#MAPT#CTF1#RSPH3#RP11-96H19.1#STOML1#FERP1#SYTL3#ADAMTSL5#HCFC2#TMEM56#TRIM34#CH17-260O16.2#MEF2C#CTD-2377D24.8#ACADS#KCTD21#ZNFX1#ZNF436#KCNF1#CLCF1#ZBED5-AS1#WHAMMP3#CITF22-1A6.3#TMED7-TICAM2#CDKN2D#MIR24-2#K…
Cluster107	AATK#DNHD1#PRDM16#POU3F3#DMRTC1B#RP11-726G1.1#CACNA1G#SBK3#CCDC121#SFT2D3#CD4#SRCIN1#CELF3#NPY2R#LRRC55#CTD-2651B20.1#RP11-326C3.7#RP11-308D16.4#RP11-89F3.2#FAM167B#SCUBE2#FNDC5#ICA1L#TMEM130#TERC#HS3ST6#ST7-AS1#CECR5-AS1#NGEF#LINC00526#CTD-2006H14.2#AC010894.3#RP11-797H7.1#FAM159A#SDCBP2-AS1#CCDC177#SEPSECS#GATS#ST8SIA6#GS1-259H13.2#NTRK3#LRRIQ1#CTNNA2#RP11-108M9.5#C2orf81#RP11-725P16.2#FAIM2#JM…
Cluster108	BEGAIN#PNCK#PTPN5#RP11-801F7.1#EMX2#KCNAB3#ZIC1#TMEM163#ILDR2#SRY#FEZF2#BZRAP1#MAATS1#MAPK10#MEG3#NRCAM#PAX8#PGAM2#RTN1#ZNF385B#KCNJ13#RP3-395M20.12#FAM69C#RP11-531H8.1#EMX1#RP11-396O20.1#ELFN1
Cluster109	AC005013.1#RABIF#RBM18#PORCN#PNPLA8#AMIGO2#PPP1R21#C1QTNF6#AC239799.1#RNF103#C20orf112#AC239811.2#RP11-311C24.1#ANKRD50#AC241952.1#SFT2D2#ACSF2#AHDC1#SHROOM2#EVI5#BMF#SLFN5#CAMTA2#SLC38A6#AP5Z1#SMIM13#FAM214B#KAZN#ZNF394#ZNF800#COG3#SNRK#CC2D1B#SSFA2#APPBP2#ISY1#ZBTB38#ZFYVE1#CNNM2#JMJD6#ZDHHC24#ZBED6#IRF9#ITGA2#ZFAND2A#ZBTB8A#IRS1#TEX264#CCDC71L#TCIRG1#FKBP15#TFIP11#GALNS#STAM2#CCDC126#SSH2#APOO…
Cluster110	ABCC6P1#RAP2C-AS1#RFTN2#PDE6B#DNAH10OS#RP3-327A19.5#FMOD#RP11-82L18.4#FMN2#JAK3#ZBTB16#ZNF449#CNTNAP3B#RP11-705C15.3#CCDC102B#RP11-57H14.4#FBXO4#KIAA1107#ZNF584#ZNF438#B4GALNT1#AC139677.7#RP11-413E6.1#FAM179B#AKR1C2#RP11-1055B8.7#ABCC6P2#BAHCC1#RP11-261C10.7#RNF144A-AS1#C11orf70#PYROXD2#PTGS1#COPG2IT1#CORO2B#DENND6B#DHFRL1#LCA5#LETM2#LIPE-AS1#LRRC27#LRRC4C#LSAMP#MAFG-AS1#MOK#NME5#CEP112#ST3GAL3#T…
Cluster111	AC004528.4#ANKRD13B#PCBP1-AS1#PCBP3#ANK2#MAPK11#MX2#NPIPA2#TIGD1#GTF2H2B#SYT2#GS1-72M22.1#SYT11#GS1-124K5.12#HLA-F#TIGD7#THTPA#ADORA1#SARDH#GK#RP11-722E23.2#GALNT16#RP11-761I4.3#CCBL1#KCNT2#ZNF280B#ZNF30#CNKSR3#RP11-368P15.3#ZNF485#KIAA0408#RP11-1151M9.1#CACNB1#RHOQP1#ACP6#PKD1P5#DZANK1#PCAT7#DNAJC12#AC114546.1#C14orf28#CTB-43P18.1#DDHD1#LINC00173#MCOLN2#NRROS#OLFML2B#SPIN2A#GRIA3#SYT13#GPR3#SLCO…
Cluster112	ADD2#TSPAN7#USP44#ITGA7#NELL2#LPAR4#LINC00617#PLP1#PPP1R1A#KIF1A#TUBB4A#ZIC2#KCNQ2#TNNI3#TCEAL2#SOX3#CACNG7#RGMA#PTPRZ1
Cluster113	ABLIM1#CENPJ#TTC27#TRIM71#ARVCF#ZNF217#CKAP2L#RP11-33B1.1#LIG1#TDP1#PLK4#FAM69B#RPIA#MTFR2#CTD-2228K2.5#RP11-152F13.3#GTPBP3#BMP7#PELI1#USP28#CEP78#AC073333.1#MIOS#ZNF519#KANSL1#RHOD#GPR137#SMURF1#PCF11#EP400#RP13-996F3.3#MICAL3#CREB1#RGPD8#GON4L#BARD1#PDCD11#WEE1#CERS1#RPS6KA1#MKLN1#ZNF766#CNNM3#RNF122#GRB10#SPATA13#PHIP#FAM111B#RRP9#MYCL#CTD-2231H16.1#RP11-347C12.1#KNTC1#C1orf159#POC1A#FBXO46#A…
Cluster114	ADCY5#TAF4B#MAFA#LMO1#DGKK#CTB-118N6.3#FREM2#RP11-215G15.5#CELSR1#TMPRSS2#DLX4#NCCRP1#AIM1L#MED12L#RELT#FAM134B#MFAP3L#MRAP2#MYH14#SMOC2#CDX1#SORBS1#GRB7#IRX3#TNNT2#TMTC2#CHN2#PLD5#ANO9#SPIRE2#GDPD5#KALRN#WWC1#VGF#ITGA9#RP11-18I14.10#WNT3A#CNKSR1#PTHLH#CA3#PLEKHA7#ELMO1#NXPH2#ELF3#NOTUM#DOPEY2
Cluster115	ABHD14A#RPL23AP7#THAP3#CAMK1#TMEM129#GDF11#TPPP3#CD99L2#TTLL1#GNB5#VASH1#HINT3#TTC8#YAF2#IFIT1#NUDT7#MUC12#MARCH9#LRP12#PCYOX1L#KMT2E#POLR3GL#PRTFDC1#RP11-182L21.6#RP11-137H2.6#CRYZL1#TSSC1#ARHGEF17#SULT1C4#ST5#SMARCD3#SLC35G1#SLC29A4#RP11-390P2.4
Cluster116	ANKRD18B#PNMA2#DRD4#POU3F1#DTNB#PRODH#EFNA5#RNFT2#ARNT2#ZNF423#NEIL3#MAST1#EPHA4#SHISA2#HNRNPU-AS1#ZNF704#ZNF620#IAH1#LRRC4B#CSPG5#RDM1#RHPN1#C19orf81#OTX1#RIMS3#RIC3#BEND5#SLC38A4#CA4#NPAS1#YPEL1#GPR50#WDR86#GPR19#TOX3#GNAZ#TMEFF1#FGF11#TMEM108#ZNF730#JPH4#SRSF12#FAXC#ST6GALNAC5#FAM72D#RP6-65G23.3#EME1#RP11-343J3.2#ANKRD6
Cluster117	AC074289.1#RP11-267L5.1#RP11-1144P22.1#POU5F1#CTD-2142D14.1#LEFTY1#LINC00371#NANOG#RP11-867G2.6#TDGF1#CER1#RP11-297M9.1#GDF3
Cluster118	AC004069.2#NTRK2#DLX2#MS4A15#KANK4#ZBTB7C#ZSCAN12P1#COL17A1#TP73#GS1-421I3.2#DLK2#SPRR2D#ADAMTS6#MTUS2#ALS2CL#TMEM40#GRHL3#PRRT4#C4orf26#ACADL#NLRP7#S100A14#CALB2#SYTL5#GPR87#KRT16P2#IL36RN#ZDHHC8P1#ZNF488#CLEC7A#HOXC13#WNT9B#TP63#CGB7#CTB-151G24.1#HTR1E#WNT10B#WNT6#HR#MCHR1#AKAP14#TFF1#GPR157#PVRL4#ENDOU#AL603965.1#ATP1A4#WI2-1896O14.1#XCR1#ATG9B#S100A7#EYA2#ST6GALNAC2#GJD2#LMO2#SLC30A2#AQP1#SOW…
Cluster119	AC002117.1#SOD3#AVPI1#ZNF654#ZNF614#B3GALNT2#LEF1#PCNXL3#GCLM#SPATA2L#KMT2C#LCOR#GDAP2#SNCAIP#KLC4#CAB39L#RP11-732M18.3#MAP4K2#CHMP4C#TNK2#TRIM27#CHRD#FLRT2#SGK223#DIP2B#OTUD3#GFRA1#ST6GALNAC3#DIAPH3#LRFN5#GMIP#STAM#DHX34#EMILIN2#RP11-465B22.3#MYO5B#ATG2A#TRMT44#TNFRSF10C#HOOK3#FAM84A#SH2B2#KSR1#AFTPH#ZBTB7B#ZBTB10#CLPB#KIFC2#PDXDC2P#ARHGAP32#SNX16#CTB-89H12.4#NEDD9#HSF4#TULP4#TUFT1#HSPA1B#CRTC3#…
Cluster120	ADCY3#VAC14#COQ10A#BAG4#RARG#RCBTB1#PIM2#C1QL1#THEM4#APBA2#CTD-2006C1.2#LRP3#TMEM231#CCDC112#LRRC37A4P#IL27RA#ZNF280D#UIMC1#CGRRF1#NGFR#NRIP3#ULBP1#GALM#TMEM192#FOXRED2#TCN2#FAM216A#ST6GALNAC4#FAM213B#SVIL#ZNF720#B9D1#SPIN2B#EPHB2#RP11-82L18.2#ENO2#RPP25#RP11-47I22.3#RP11-452F19.3#ANKRD9#PRRX2#DPY19L3#QSOX2#PTPRK
Cluster121	BCL11A#RP11-318G21.4#PLEKHG6#SFN#CD177
Cluster122	ARHGAP24#S100A3#HLX#SYNPO#UNC5C#INHBA#GPRC5A#TGFB2#PLEKHA2#PLAC8#MTUS1#LYPD6B#LRRC32#CTD-2377D24.6#FAM198B#RGS4#PRICKLE2#C1QTNF1
Cluster123	AC009501.4#RAD51B#PLEKHG1#KCNIP2#VIPR2#VSTM2B#IFI27#HTR1D#TTC12#TMCC3#ADHFE1#AC009506.1#LINC01003#MAP3K14-AS1#ALDH5A1#SLC4A8#CCDC163P#BACH2#TIFA#GABRG3#C16orf46#MLLT4-AS1#NHLH2#NTNG2#OR7E101P#OSER1-AS1#PDE10A#PKD1L2#PLCL2#SIRT4#FHIT#SHANK1#CBFA2T3#RPS10-NUDT3#ZNF285#KIAA1456#RP5-943J3.2#RP13-516M14.1#RP11-303E16.8#C5orf54#RP11-319G6.1#C5
Cluster124	AC139677.4#PPP1R32#RAI1#POLH#DNAJC6#CTD-2319I12.4#RP11-350D17.3#RP11-159N11.4#BCL6#SLC6A16#CCDC102A#C11orf63#ZBTB22#ARSG#CREBRF#MEIS1#LINC00085#CUL9#RP11-767N6.7#C9orf9#LIX1L#SCAPER#ACYP2#MUM1L1#ZBTB41#GRAMD1C#NKIRAS1#NMNAT1#OSBPL5#OVGP1#ZC3H12C#ARPC4-TTLL3#VPS9D1#GLIS3#VSTM2L#GGACT#TTLL3#GDPD3#TEF#ARHGAP5-AS1#IGDCC4#ZNF699#ZNF624#CMTM1#RP3-510D11.2#CARF#RP4-717I23.3#AP006621.5#RP11-1319K7.1#RGS20
Cluster125	ABI3#RAB30#RP11-757G1.6#RP11-73M18.2#AIFM2#KRT8P12#LYSMD2#MIR3179-2#MSRA#NDST3#PLSCR4#CNIH3#STAMBPL1#SLC9A9#CHRNA1
Cluster126	AC096677.1#THRB#TMEM191C#ISL1#LY6K#PPARG#PLEKHA6#NCOA7#NPB#NPNT#PDE3A#CYSLTR2#CTD-2267D19.3#AL590369.1#RP11-61L23.2#CSGALNACT1#KYNU#HAAO#TFEB#ACPP#SYNPO2#TNFSF10#COL16A1#SMAD9#EPSTI1#SAMD5#RUNX1#RP4-781K5.2#EDN1
Cluster127	ANKRA2#PBK#RP11-680F20.12#RP11-923I11.6#CABLES2#SHROOM3#KDM4B#ZNF347#SLC2A12#JAG1#WNT5B#ZNF521#KANSL3#FIGN#STMN2#CCDC74B#TCFL5#BORA#NRIP1#DLL1#CROT#CTD-2228K2.7#NUAK2#ODF3B#IL17D#UBE2W#TNFRSF25#ATP11A
Cluster128	AC005083.1#PCDH20#PDE6G#DPEP3#AC010761.6#BRINP1#RP11-10A14.6#RP11-107N15.1#AC012512.1#RP11-395P17.11#CADPS#AIF1#RP11-481A20.11#FGF13-AS1#RP11-65G9.1#FXYD1#CLC#UNC13A#TMEM132D#ATP1A3#RP5-865N13.2#GLS2#SEMG1#AC007250.4#SLC34A2#AC093627.7#SEZ6#GRM4#ONECUT1#MYCT1#MARCH3#LINC00698#KLHDC7A#DGUOK-AS1#CTD-2058B24.3#C16orf89#AMBP#CRYBB1#RP11-400N13.2#RP11-385F7.1#CRYGEP#RP11-359N11.2#EIF4HP2#CTD-2297D10.2…
Cluster129	DNMT3B#RP11-256I9.2#SPINT1#SLC7A8#PODXL#SEMA6A#ESRG
Cluster130	AC087073.1#SUCLA2-AS1#CDH26#TBX22#HIST1H4I#TNS4#VIL1#HNRNPA1P66#ADM5#TMPRSS11E#TMC5#HIST1H2BE#GTSF1#TBL1Y#OTUD7A#NTNG1#NRG3#NR0B1#MYO1F#MKX#METTL7B#MAGEB17#LRRC2#LINC00992#LINC00240#C1QTNF9B-AS1#PRND#PRSS2#PRR19#AC123886.2#SOX10#CD48#SPATA16#GABRB2#KCNJ3#ZFHX2#USP2-AS1#IL34#SLC47A1#FOXB1#SLC25A48#FGFBP1#CTC-499J9.1#SLC22A3#FBP1#CTD-2007L18.5#SAMD3#FAM35DP#CTD-2035E11.4#RP11-822E23.8#EPHA1-AS1#DEC…
Cluster131	ACBD7#MT-TS2#NECAB2#ENO3#AMPH#COL9A1#CTD-3193O13.9#KLHL13#LMO3#LRRC4#MIAT#B3GAT1#Z83851.1#TMEM74#ATP1A2#TAGLN3#GAL3ST3#RNF165#CCDC181#RNF175#FAM57B#PCP4#CALY#PLEKHB1#CA14
Cluster132	ADCY6#ZNF385A#NCOA6#NBPF9#MOB3A#LPIN1#CRELD1#COMMD3#DYRK1B#PTCHD4#NARFL#C1RL#ZNF410#ZSCAN16-AS1#HSD17B14#ZNF428#GAS1#SMG9#CCNG2#SMYD2#CACNB3#SHC2#SGSM2#SEMA5A#EDA2R
Cluster134	C1R#TMEM35#TOX2#CD82#NR2F1-AS1
Cluster135	A2ML1#CCDC64#ZNF57#KCNK1#AC010761.8#DOK3#PPL#PRRG2#C1orf210#PROM2#C1orf116#AJAP1#CRLF1#LPPR5#NFASC#SYN2#GPR160#SPIB#ARHGEF16#ITLN2#VSIG1#UPK3B#IRF6#SERPINI1#AP000688.29#BEND3#CTC-260E6.10#DEF6#N4BP3#NRN1L#HPN#TPH2#TENM2#HLA-G#IL17RE#TTC39A#TMEM125#ATP12A#JPH1#ZNF165#ZNF341#B3GALT5#RP11-96D1.11#RP11-73M18.9#DHRS3#NOS1AP#OGDHL#PAK6#TCERG1L#GPANK1#SST#ABCC9#PCDHA11#SPTSSB#ADAMTS15#SNX18P7#CBLC#SLC15…
Cluster136	AC005062.2#NANOGP8#CT49#CTB-180C19.1#CTC-286N12.1#LCK#LINC-ROR#VSNL1#ZSCAN10#HAS3#SCNN1A#GRPR#RP11-536I6.2#AP002856.5#RP11-380P13.2#AP000459.4#RP11-359M6.1#RP11-181K12.2
Cluster137	AC005682.5#SNCG#ARSE#THBS2#MPZL2#CXCL3#BATF3#PLA2G4C#PRDM11#AC233294.1#SLC17A9#RP11-783K16.13#CTD-2269F5.1#CTD-2286N8.2#NR3C1#TANGO6#GRIK2#ITPR2#TTC39B#ULK4P2#AC108488.4#CXCL5#DES#DLG5-AS1#NR5A2#HMCN1#TNFSF11#TMEM110-MUSTN1#ASPHD1#KLHL4#RP11-624L4.1#AC022007.5#LAMC3#LIMD1-AS1#OR2A20P#LINC00941#AGMAT#WDR81#KIAA0754#AC008982.2#LPPR4#PARP12#INHBE#ULK4P3#TSIX#CHRNA7#SSTR1#ADAMTS8#ST8SIA5#CCL26#SLC25A…
Cluster138	ACVR2B#ORC1#CAMSAP3#PLEKHG4B#FAM72A#PTGIS#FANCA#PTPRD#FANCD2#PPP2R2B#KCNE1L#TPD52#RAB3IP#CMTM8#STAC#TAF5#CNIH2#CDC25C#RP11-366M4.3#CDCA2#RP11-480I12.5#CDCA3#RTN4R#C1orf106#CTD-2561J22.5#KIFC1#DSCC1#SLAIN1#CELSR2#JPH3#TENM3#SPSB4#IRX2#RTKN2#GRB14#IGFBPL1#SPTBN2#SLC1A6#ASPHD2#OIP5#FAM169A#KIF14#ELAVL2
Cluster139	DSC2#DUSP5#KCTD14#SNORD17#HSPA2
Cluster140	ACPL2#RTN4RL2#SATB1#SCLY#SCML2#SLC25A15#SLC25A33#SLC27A5#SLC43A3#SYNGAP1#SYNGR3#SYTL2#FAM19A5#TMEM52#FAM86C2P#TMEM39B#B3GALT1#ZNF74#TSPAN33#CCDC152#TUBGCP3#FNDC4#WIPF3#ARHGEF19#ZNF589#LINC00263#DHX57#CREB3L4#PRKCQ-AS1#COQ7#COQ3#CCDC41#ZBTB3#PALM3#BRSK1#BARX1#GALNT12#ZNF678#OR7E12P#RAMP2#RIMS4#RP11-152F13.7#RMI1#AMT#RP11-583F2.1#RP11-424C20.2
Cluster141	ADCY1#ZC3H4#C1orf226#RASGEF1A#RP11-253E3.3#RIF1#C10orf137#DHX37#VPS9D1-AS1#CD3EAP#CTC-340A15.2#MDN1#NTN1#METTL8#MTL5#NCAPD3#PGM5P2#PLK1S1#TTF2#GATA6#TAC1#ZNF559#IPO11#SYT6#CBLN1#STOX2#FAM86C1#SNTB1#FAM157A#RP11-585P4.5#RP11-578F21.12#RP11-339B21.15#RP11-318L16.6
Cluster142	BCL2#RASGRP1#TINCR#PHYHIPL#MYOZ1#OXGR1
Cluster144	AC020571.3#PLA2G4A#RP11-134G8.8#ACOT1#BDKRB1#CPA4#ITGB3#TICAM1#TANC1#CERKL#LEPR#LIMS3L#SVEP1#GBP2#LMOD1#MAP1A#NPAS2#NPR3#PAPPA#PDGFC#PEAR1#SERPINB8#FLI1#SSC5D#FKBP9L#SLC4A4#ADAM12#KIAA1462#TRIM38#TMEM204#COL15A1#SLC16A4#EVA1A#SLC16A6#RUNX2#RP11-357H14.17#RP11-332H18.4
Cluster145	ARRB2#SLC4A7#NLGN4X#MCM2#FAM64A#RNF138#RND2#RMI2#DBNDD1#INA#TNNT1#STRBP#CHAF1A#SGOL2#GINS2#SCAMP5#FGF13
Cluster147	BRSK2#SPOCK1#ST6GAL1#RP11-849I19.1#RNU2-59P#CTB-175P5.4#RBP7#TMEM132B#GPR27
Cluster148	AC226119.4#APLNR#PDE2A#OR5H5P#ACOT11#CTD-2008P7.9#CTD-2267D19.6#SPAG1#USP43#HIST1H2BJ#PTH1R#GFOD1#PLA2G2A#ARHGAP40
Cluster149	C9orf135#RP11-431J24.2#NANOGP1#ECSCR#CTD-2058B24.2
Cluster153	CD164#S100A4#EFEMP1#MIR4435-1HG#RHOC#F2R#DGKZ#RP11-259O2.3#SQSTM1#IGFBP4
Cluster154	AC003070.1#TRIM58#TPM3P9#IL32#ADAMTSL4#STK10#CEACAM1#TLN2#PDZRN3#NMRK1#MATN2#MAP3K8#LMCD1#CTD-3099C6.9#C9orf3#RP11-91J19.3#PLXNA2#ACOX1#SMAD7#FLVCR2#SMAD6#AQP3#SLC2A14#UBASH3B#AC008440.5#SMARCA2#SLC7A7
Cluster157	AC007362.1#TCTA#TRAK2#HOXB2#ARSJ#SP110#DUSP10#CYP1B1#CTD-2319I12.1#ANO4#LACC1#LIMS2#FAM129A#ALDH1A3#RIN1#GOLGA6L5#NAAA#GGT1#MMP19#GATA4#MAPK13#ARHGAP10#LRRN4#ZNF804A#JAZF1
Cluster159	BEX1#RP4-792G4.2#OTX2#MIR302B#NODAL#SOX2#FOXH1#RP13-238F13.5#FGF8
Cluster160	CAMKV#SEMA6B#RP5-1024G6.8#ENHO#CRIP3#NUDT10#PLA2G3#SYT1#CDHR1
Cluster161	ATCAY#STK33#SLC35F1#HDAC9#PIANP#NLGN3#LRIG1#RP4-639F20.1#SCG5#RNF157#ENPP2#SLC16A14#WSCD1#CLGN
Cluster164	ABCA1#MEIS2#NTF3#CAMK1G#DACH1#LGI1#RIN2#CDC42EP5#PPAPDC1A#SEMA6D#CNTN4
Cluster165	C21orf88#GRP#RLTPR#MFSD2A#EPHX3#SOX17#SYNE4#HBA1
Cluster168	ACTA1#CYP26A1#L1TD1#ACTC1#AK4#CRABP1#MT1F#GYLTL1B#MT1H#CDH1#LRRN1#GAL#CNTFR#NPPB#MT1G#CLDN6#LIN28A#FIBCD1#COL2A1#WFDC2#ST14#CNTNAP2
Cluster169	CA2#PRKCZ#RAB11FIP4#SEMA7A#IGSF3#LAMA1#PEG3
Cluster171	ERVH48-1#SCG3#TRIML2#ESRP1#RP1-46F2.2
Cluster172	ABHD12B#RP11-727A23.10#TRDN#B3GNT7#NTS#RAB17#CTC-210G5.1#RP11-561I11.3#CALB1
Cluster173	AXIN2#UGT3A2#KRTCAP3#BACE2#CGNL1#TMEM30B#TMEM92#CGN#EPB41L4B#FGF12#SLC22A23#RASL11B#ESPN#SLFN13#CDS1
Cluster174	AIF1L#DEPDC1B#CYYR1#COL9A3#CXADR#SBK1#ARID3B#PMEL#GLDC#NR6A1#CD74#LECT1#CD200#IGLON5#TSTD1#WNK2#COL26A1
Cluster175	AC243547.1#MAGI2-AS3#TXNIP#GAS6#NRG1#FZD8
Cluster178	ALG1#SDF2L1#BCAR1#SH3KBP1#FNBP1
Cluster180	ASIC1#RP11-566J3.4#PTPRN2#DCLK2#CXXC4
Cluster181	ADAMTS16#SH2D3A#MARVELD3#FAM189A2#LAD1#RP11-59E19.4#TC2N#AFP
Cluster183	CLIP3#IFI27L2#GSTM2#EIF2AK4#CTDSP1
Cluster185	CRB2#SKIDA1#WNT7B#FBLN7#LEMD1
Cluster186	KAT2B#ZFHX3#USP35#SPHK1#MXD1
Cluster188	ARHGAP29#SOX9#CXorf57#TEX30#CNNM4#COL9A2#SESN3#GAB2
Cluster189	ATF5#UHRF1BP1L#UBXN8#HAS2#PITX2#MTMR1
Cluster190	C16orf45#FGF2#GNG2#JAKMIP2#TMEM246#ETV1#LDB2#GPR176#IGSF1#SLC15A3#REEP2#CHRDL1
Cluster196	BEX5#IRS4#ZFR2#NPTX2#NMU#GATM#KIF5C#YBX2#GRIK5
Cluster197	ARHGAP8#PRSS8#CTD-2306M5.1#MAL2#HSD11B2#RAB25#ZFP42#CKMT1B#MAP7#SMPDL3B#CKMT1A
Cluster198	BDKRB2#GLIPR1#GPR126#KCNE4#MIR22HG#JOSD2#CLDN1#GALNT6
Cluster200	CDH3#TPTEP1#RP11-426L16.8#GABRP#LINC00458
Cluster201	CECR2#GNG4#IL17RD#NKAIN1#KLHL23#CLDN10#GABRA5
Cluster206	CEBPB#LGALS3#KCTD12#PPIC#PLP2#CHAC1#DNAJC3
Cluster208	ADM#LOXL1#NUCB2#COL11A1#EVA1B
Cluster216	C19orf66#ME1#JAK1#STC2#PROCR#ITGA3#CTD-2562J17.7#DCBLD1#LHFP#LMO7#LRP10#PIEZO1#CDCP1#PCYT1A#FNDC3B#PDGFRB#FKBP14#STC1
Cluster217	AC244230.1#KRT17#ACAN#BCAR4#KLK6#CPM#MRGPRX3#ERP27#CSF3R#DACT2#KRT23#HES2#UCA1#VTCN1#CLEC1A#TNFRSF19#GRHL1#SPNS2#GPR32#SLIT3#CDH5#SLN#GAST#RP11-314M24.1#ADAMTS20#RGCC#FYB#ITGB6#ZNF750#XAGE2#INSL4#ISM2#WNT11#XAGE2B#IRX4#LYPD5#C5orf46#LINC00379#C4orf19#CGA#PRR9#MUC15#MRGPRX1#MFAP5#LGALS16#ERVV-2#ERVV-1#ERVFRD-1#CGB5#RP11-266L9.2#DLX3#CYP19A1#CGB8#S100P#GCM1#CYP11A1#HSD3B1#TFAP2A#HTRA4#VGLL1#CTD-262…
Cluster218	A2M#FIBIN#TCF21#IL7R#CLEC14A#SQRDL#TMEM173#IL8#CD36#GNG11#HTR2B#RAB27B#RP11-524D16__A.3#IL18#CHODL#PODN#PRR16#CHRM2#GPNMB#NT5E#CFH#NKX2-5#PDE1C#HGF#CXCL1#COPZ2#COLEC11#COL8A1#ANGPT2#FENDRR#FGF7#CLEC2B#TNFSF4#RGS1#IL18R1#ALDH1L2#C1S#DEFB1#DLL4#ABLIM3#ERAP2#SYTL4#AGT#FABP4#F2RL2#FOXF1#TRPA1#COLEC10#CASP1#SRPX2#MMP1#CARD16
Cluster219	ESRRG#OTUB2#REEP1#FOLR1#MGAT4A#NDNF#NOS2#SLC38A3
Cluster220	AL139819.1#F2RL1#SERPINE1#NQO1#ECE1#DACT1#TES#GPR37#SPRY4#UNC5B#IL13RA1#PLOD2#EPHX1#PMAIP1#EDNRB#PDIA5#EDIL3#TFPI2
Cluster221	ANXA4#PDLIM3#FAM114A1#PROS1#GBA#SEPP1#CD248#SLC17A5#GNAI1#SMPDL3A#CDH13#SMPD1#HNMT#ZNF503#TNS3#NID2#MYLK#MIR503HG#MAP1LC3A#MAN2B2#C12orf23#DYNLT3#OPTN#P4HA2#EDEM1#BMP1#PDGFRA#MT1L
Cluster224	ARID5B#NUPR1#HAPLN1#TBX3#PITX1#LURAP1L#DCN#TRPV2
Cluster225	AADAT#RGS16#GPT2#SERINC5#BAIAP2#EPS8L1#KIF21A#MYCN#CACNG4#HAPLN3#SOX13#SRC#ATF3#PKP2#TAC3#KIAA1217#PAQR8#FAM107B#SDC1
Cluster226	CLDN4#TACSTD2#SYT7#ITGB4#EPB41L3#FAM110A#OVOL1#FAM65B#EGLN3#SLCO4A1#FRAS1#SLC1A3#FOXI3#SLC27A2#FHDC1#MREG#TJP3#KHK#SLC13A4#ERVW-1
Cluster227	HSPB8#SGK1#STS#SUSD2#NABP1
Cluster228	C14orf23#RAX#MAP6#MPPED1#PAX6#SMOC1#TMEM169#HES5#SOX21#FEZF1#RP11-89K21.1#FEZF1-AS1#LHX2#FOXG1
Cluster229	ACVRL1#EMP1#GGT5#CCDC68#C11orf96#PAPPA-AS1#GPR124#HOXB9#TMEM100#PCSK6#HOXB7#MGLL#CD97#ITGA8#Z82188.1#TM4SF1#ITGA11#HSPB6#PTGDS#CASP4
Cluster230	COL3A1#TGM2#LUM#EPAS1#LOX#COL6A3
Cluster231	AHR#ECM1#FILIP1L#OLR1#CDKN2A#DPP4#IL1R1#WNT5A#TMEM119#HAND2#SFXN3#CEBPD#CYGB#NNMT#WISP1#COL12A1
Cluster232	COL14A1#SUMF1#SCG2#MLPH#PHLDA1#RFTN1#LIFR#POSTN
Cluster233	COBLL1#TENM4#PRSS12#RIMS2#GADD45G#MAST4#KRT7#SLCO2A1#HPGD
Cluster234	AP001888.1#DKK4#RP11-598D14.1#FGF4#SP5#GAD1#FGF17#T#EOMES
Cluster235	AC010441.1#DUSP1#PDE5A#PARM1#DRAM1#NKX2-3#BMP4#MBNL1#SMIM3#TMTC1#ICAM1#BTN3A2#CPQ#LPAR1#CSF1#CYBRD1#KLF2#TBX2#GLT8D2#SNCA#G0S2#SLC2A10#ADAMTS12#SGSH#FBN1#SH3RF3#FABP3#RPS6KA2#ANTXR2#RNF24#C6orf1#PLAT#CCDC3
Cluster236	CCKBR#DIO3#FHOD3#NKAIN4#EFHD1
Cluster237	CCDC160#SIX3#RP11-551L14.1#LFNG#FABP7
Cluster238	CDKN2B#NRP1#NOG#KCNMA1#HOPX#FAM46A
Cluster240	ENG#LPL#ITGA1#MXRA5#FBLN5
Cluster242	ANLN#KAL1#ZNF826P#PKMYT1#CTSV#NUF2#RFC3#CENPH#CDCA8#NCAPH#VRK1#JARID2#ARG2#CENPF#NDC1#TTK#CMSS1#ARHGAP11A#CPVL#MKI67#TROAP#INCENP#BUB1#DDX11#MLF1IP#TACC3#IMPA2#DLGAP5#EPB41#MSANTD3-TMEFF1#SPAG5#IGDCC3#EZH2#F11R#NET1#FAM83D#FANCG#FANCI#MAD2L1#SPC25#HMMR#KIF20A#KIF23#PSRC1#KIF2C#LMNB1#LPPR3#LSR#RAD51AP1#RASEF#SLC39A8#HELLS#RBM38#CENPN#NNAT
Cluster243	AMOT#MBNL3#PGF#FOXO6#MSX2#ANKS1A#EPS8L2#RP11-295G20.2#FAM214A#SMTNL2#FAM49A#SOX7#FDX1#TANC2#BGN#PPM1D#PPP1R13L#RELL1#C1orf115#PAK3#DIRC2#SLC43A2#SH3BP5#CSF2RA#TNFAIP3#GDF6#KIFAP3#LPCAT2#PRR15#DOK5#KLF8#TMEM62#CCSAP#MAFK#PCSK1N#MED13#PHLDB3#PIFO#PLEKHF1#HSD17B1#TWIST2#TPD52L1#HEY1#KIAA0040#ZNF702P#ZNF468#ATP6V1C2
Cluster244	C10orf10#PDE4D#C10orf54#SEMA3C#GREM2#PID1#CD274#CLSTN2#TRIM55#TREM1#CLIC3#GATA2#SLC40A1#FBXO32
Cluster245	AC007743.1#UHRF1#PTCD3#EPHA2#ANXA3#INO80C#UNG#POLR2A#ECT2#ANAPC15#KAT8#ZNF738#POLR1C#DKC1#PLK1#KIAA1328#ZWINT#PHF10#CYB5R2#PELP1#TSPAN13#PARD3#CTNNAL1#PAK4#TMPO#PAK1#CTC-260E6.6#CERS4#TTLL4#TXLNG#HADH#AC092299.8#AP1G2#FASTKD1#RFC5#TTLL12#HSPA14#ARHGEF7#FKBP1B#RRM1#FOXM1#BCL2L12#GFPT2#RRM2#GPC3#BEX2#GRK6#RSRC1#KLHL7#BIRC5#LIN28B#SALL2#MAP3K13#C1GALT1#MCM3#SLC25A36#MIIP#CASP3#MYEF2#STRA13#NIF3L1#CP…
Cluster246	ABHD5#DOCK9#OLFML2A#NDRG1#DNAJB9#BHLHE40#ST3GAL1#GRAMD3#DAB2#DCAF6#DDIT3#LAYN#HIST2H2AA4#TOM1L2#SYDE1#ADM2#KLF4#LIMCH1#LPHN3#MAML2#MAOA#MICALL2#MSX1#SPSB1#GATA3#SLC7A2#ZNF703#CLCN5#RP11-611O2.3#ARHGAP18#RHOBTB1#FBRS#PTPN21#FAM43A#RAB3IL1#ELF4#PTGES#ELF1#OSTF1#EGLN1#NCOA3#TNFRSF1B#ATP10D
Cluster247	ACBD3#TPRG1L#HADHB#SEC22B#MED19#CALCOCO1#NPC1#ZMAT3#COL4A6#PIGK#DSCR3#RCN3#TRIB3#HIPK2#ACO2#GNPTG#RRAGC#LMF2#C6orf48#MRPS36#TBC1D9B#PBXIP1#CYSTM1#PPP1R12A#TXNDC15#CHST2#ALCAM#GOLGA5#RP11-735A19.4#LARP6#ARMC9#MMAB#STAT1#PCDH18#CYTL1#POLD4#TOR1B#IFNAR1#AP2A2#G6PD#RRAS#LEPROT#BAD#MMP24-AS1#TM2D1#PCDHGB6#DHRS4L2#PRKCDBP#TSC22D3#CHPF2#APOPT1#GOLIM4#S100A16#LRCH4#C6orf89#NEO1#TPST1#PLAUR#DZIP1#RGS10#FZ…
Cluster248	ABR#SMG5#PI4KAP1#DHX32#NOTCH1#FYN#TEAD3#MED25#CREB3L2#EAF1#RNF113A#ARIH1#TMEM2#LAMA5#HIC2#USP15#UBALD2#HPCAL1#FAM160A2#SMG7#GSK3B#TRNAU1AP#COLEC12#PACSIN2#FNDC3A#STK40#NFKBIA#BTBD3#PTPLB#PUS3#CCSER2#TM2D2#MAN1A2#BNIP3P1#EFNB2#RTN2#CDK7#TRIM33#KIF3C#ASS1#ULK1#TRIM5#HEXIM1#FAM102A#SIAH1#CENPT#UBAP1#UGGT1#HERPUD1#DCAF12#H2AFJ#TRIM13#FAR2#SORT1#PHKG2#C12orf75#OSER1#FLNC#STXBP2#NT5C2#BNIP2#NFIL3#FRMD4…
Cluster249	CDKN1A#S100A6#CTSB#ADI1#SH3GLB1#SRPX#CFL2#BAG3#EHD3#MED31#LBH#EFHD2#MVB12A#FAM120A#BTG1#RELA#GOSR2#DDIT4#RNF185#GSTM3#EFEMP2#RGS2#GSN#PLK2#FBXW5#HES1#SETD8#RTCA#ASAP1#HIST1H2BK#SLC35E1#TGFB1#ATP2B4#PSMD9#GNS#PIP5K1C#GNA11#PLIN2#GLRX#PMP22#GFPT1#IDS#SULF2#VPS35#CMPK1#ITGA5#TRIP12#TMEM179B#ITFG1#ITGAV#TWF1#WIPI1#COL4A5#PHLDA3#VEGFA#KDELR3#PARVA#CAPN2#NFE2L2#CANT1#MXRA8#CAMK2N1#MOCS2#FAM115A#MDM2#EN…
Cluster250	DUSP6#SERPINF1#SPRY1#VCAN#UBE2L6#BLVRA#LGALS3BP#LGALS1
Cluster251	ACKR3#ADAMTS2#RHOBTB3#ENDOD1#MAN1A1#NACC2#TGFB1I1#JUNB#KLF6#LMNA#MANBA#HTRA3#SNAI2#S1PR3#CERCAM#RAB32#CCDC80#OSMR#FRMD6#OAF#ADAM9#EHD2#IL6ST#TGFBR2#GDF15#IGFBP7
Cluster252	ABHD6#PIK3R3#C18orf54#TBC1D22B#CDK5RAP2#SEMA4D#FILIP1#RP11-222A11.1#EFTUD1#TAF1A#GPR153#CTC-338M12.5#MTERFD3#STRADA#CDK14#RRP7B#FGF14-AS2#RP11-111M22.3#RP11-1094M14.11#AC009005.2#DCK#NOVA1#SUPT3H#ARID3C#RP5-935K16.1#AD000090.2#RAB6B#DPH6#AHI1#L3MBTL1#PCIF1#SPATA33#FZD1#RP13-582O9.5#AP001347.6#TMEM241#CENPC#BBC3#MACROD1#TMEM8B#GTF2IRD1#SMIM8#FLRT3#RP11-22P6.3#RP11-15H20.6#ALDH6A1#CTDSPL#NRGN#TAZ#G…
Cluster253	AC083799.1#SULT1A4#HACL1#STK17A#PDF#DSE#ROR1#GSDMD#ALG11#MYO1E#SNX24#KIAA2026#PPP1R3B#FAM63B#RP11-498C9.2#LRP1#C18orf25#PHLDB2#TRIB1#IER3#ACAP1#KIF13A#SETD1A#NRP2#CYP20A1#PTPN14#FHOD1#ACY1#METTL1#ZBTB2#KCNK6#PI4K2B#ELL2#SCFD2#KLF10#BCL2L2#PKD2#TRIP11#CLIP1#ALG12#L1CAM#SEC24D#PLBD1#DUS3L#PVR#FRMD8#ARHGEF34P#MFSD1#WI2-3658N16.1#ITSN2#ARHGEF5#GBGT1#SIPA1#LRP4#CDC42EP2#PLEKHO2#TNFRSF10A#ICAM3#ARRB1#L…
Cluster254	ABCC4#IGFBP6#SMIM10#PIEZO2#NTM#ANPEP#EMILIN1#FAM167A#PAQR5#AR#RP9P#SLITRK5#HMSD#NAV3#MRGPRF#CXCL6#CTB-5E10.3#LRRC17#C12orf68#C15orf65#NPY1R#BTN3A1#RGS17#GRK5#PLAGL1#GRIA4#HOXC10#SULT1A1#TSLP#CNTNAP1#POPDC3#AC037459.4
Cluster255	ABTB2#ZNF114#MMP9#LYPD3#PRKCH#TCL1B#VAV3#TINAGL1#CST1#CST6#DYSF#DENND1C#CYP2J2#ITIH5#PKP3#NMNAT2#HEY2#MIR205HG#GRHL2#MET#GJA5#LAMC2#FGFR2#FGF18#FGD5#FAM83B#RP3-523K23.2#COBL
Cluster256	ADAMTS19#SLC12A8#CPT1A#RP11-879F14.2#PARP9#TNFRSF11B#CD109#RAC2#HOXC8
Cluster257	BCORL1#GNE#WIPF1#PDCD4#ENC1#MBNL2#IFI6#CCDC92
Cluster258	DKK1#ZNF600#FAM110B#ZNF592#MAFB#RP11-20I23.6#TAF4#PIK3CB#DUSP8
Cluster259	C20orf27#NPDC1#JAM3#ZNF532#VAT1L#IMPDH1#MAP9#MAPKAPK3#RRP15#GSTM1#OR2A1-AS1#FXYD6#MLF1#HIP1#PHC1P1#TGIF2#HMGN5#NTMT1#ZNF787#CNFN
Cluster260	BCYRN1#PTX3#RP11-1002K11.1#TCEA3#EMID1#MAB21L2#MRVI1#WNT2B#GRIA1#IDUA#ZNF467#ZEB1#HPSE2#UBA7#TSHZ2#SGIP1
Cluster261	ACYP1#PLCG1#APLP1#PLGRKT#CBX5#POLDIP3#CCDC74A#RP11-344E13.3#ARL4C#RP11-620J15.3#CTNNBIP1#CRIP1#C6orf57#DTX3#NAV1#ZNF219#KIAA1430#BTG2#ING4#SLC25A29#SPA17#AGBL5#EFNB1#FOXK2#CDK2
