# Supplementary material for: Dynamic regulatory module networks for inference of cell type–specific transcriptional networks
Source: HighWire-hosted journal article supplement (doi:10.1101/gr.276542.121), 2022-06-15
Supplement: Supplemental_Table_S4.pdf [file Supplemental_Table_S4.pdf]

| Dataset                       | # Regulators |
|-------------------------------|--------------|
| H1ESC differentiation         | 179          |
| Reprogramming sequencing data | 101          |
| Hepatocyte dedifferentiation  | 23           |

**Supplemental Table S4.** Number of important regulators for each dataset used for assessing regulator ranking.
