# Supplementary material for: Dynamic regulatory module networks for inference of cell type–specific transcriptional networks
Source: HighWire-hosted journal article supplement (doi:10.1101/gr.276542.121), 2022-06-15
Supplement: Supplemental_Table_S6.xlsx [file Supplemental_Table_S6.xlsx]

## Sheet: Caption
Supplemental Table S6. Significant interaction per module, where significance was defined as z-score higher than
the given threshold (1 for reprogramming datasets and 3 for the other two datasets). Each sheet corresponds to one dataset.

## Sheet: Legend
Included here are summaries of significant cis-regulatory elements/motifs and chromatin marks for each of the four analyuses.
For each data set we did the following analysis:
1. For each respective module we took the inferred DRMN edge weights across all conditions (cell-type or time point) and assessed a Z-score for the predicted edge of each motif to that module for each condition.
2. For each module those motifs with a significant edge in at least one conditon were selected, where a simple Z-score threshold was applied.
3. For the Xie et al., Chronis et al., and Sridharan lab data set the same analysis was applied separately for chromatin mark and dnase features, from the same DRMN results. This was not applicable to the Thomson lab dedifferentiation data set.
4. The resulting summaries of significant cis regulatory and chromatin mark/dnase edges were presented in Figures 4C, 6C and 8C
5. The Z-score thresholds were Z=3 for the Thomson labl and Xie et al data sets, and Z=1 for the Chronis and Sridharan lab data sets.
In this file there is one tab for the results of each data set (as labeled), and the results are given in the following format:
Module	Motif	CommonRegulatorName	Conditions	…
			Z-score values of edge weight across conditions
			Presented in a white->red colormap for values 0-5
			1.45	3.2	7	0.5
Here the mapping of CisBP motif ids to common regulator names is relevant to the Thomson lab and Xie et al. data set results. Otherwise where common names were used up front in the DRMN analysis the "Motif" and "CommonRegulatorName" columns will be identical, i.e., for the Chronis et al. and Sridharan lab data set results. These columns will also be the same for the edges representing chromatin m…

## Sheet: Sierup et al data set
Module	Motif	CommonRegulatorName	x0h	x0_5h	x1h	x2h	x4h	x6h	x8h	x10h	x12h	x14h	x16h	x18h	x20h	x22h	x24h	x36h
Module1	M5523_1.02	Hnf1b::Hnf1a	0	0	0	0	0	0	0	0	0	0	0	0	0	0	0	3.01278
Module1	M5521_1.02	Hnf1b::Hnf1a	0	0	0	0	0	0	0	0	0	0	0	0	0	0	0	3.07295
Module1	M6246_1.02	Foxo3::Foxo1::Foxo6::Foxo4	0	0	0	0	0	0	0	0	0	0	0	0	0	0	3.0545	0
Module1	M1510_1.02	Lcor	0	0	0	0	0	0	0	0	0	0	0	0	0	0	3.06144	0
Module1	M6289_1.02	Hoxc9::Hoxc8::Hoxb8::Hoxb9::Hoxd8::Hoxd9::Hoxa6::Hoxd10::Hoxa10::Hoxc10::NP_032296.2::Hoxa9	0	0	0	0	0	0	0	0	0	0	0	0	0	0	3.2168	0
Module1	M0630_1.02	Dmrt1	0	0	0	0	0	0	0	0	0	0	0	0	0	0	3.29725	0
Module1	M5522_1.02	Hnf1b::Hnf1a	0	0	0	0	0	0	0	0	0	0	0	0	0	0	3.32548	0
Module1	M5978_1.02	Zfp740	0	0	0	0	0	0	0	0	0	0	0	0	3.90843	0	0	0
Module1	M5972_1.02	Zfp410	0	0	0	0	0	0	0	0	0	0	0	0	4.28738	0	0	0
Module1	M5894_1.02	Tbx21::Eomes::Tbr1	0	0	0	0	0	0	0	0	0	3.08464	0	0	0	0	0	0
Module1	M1067_1.02	Cphx	0	0	0	0	0	0	0	0	0	3.21764	0	0	0	0	0	0
Module1	M5704_1.02	Pax3	0	0	0	0	0	0	0	0	0	6.0995	0	0	0	0	0	0
Module1	M5710_1.02	Pax3	0	0	0	0	0	0	0	0	0	6.81597	0	0	0	0	0	0
Module1	M5584_1.02	Alx3::Alx1::Isx::Alx4	0	0	0	0	0	0	0	0	3.03391	0	0	0	0	0	0	0
Module1	M1865_1.02	Foxa1::Foxa3::Foxa2::Foxf1a::Foxc2::Foxc1::Foxk2::Foxk1::Foxg1::Foxe1::Foxe3::Gm5294::Foxi1::Foxi3::Foxi2::Foxf2::Foxb1::Foxb2::Foxq1::Foxj1::Foxj2::Foxj3::Foxd4::Foxd2::Foxd3::Foxs1::Foxd1::Foxl2::Foxl1	0	0	0	0	0	0	0	0	3.10677	0	0	0	0	0	0	0
Module1	M0757_1.02	Foxa1::Foxa3::Foxa2::Foxf1a::Foxc2::Foxc1::Foxk2::Foxk1::Foxg1::Foxe1::Foxe3::Gm5294::Foxi1::Foxi3::Foxi2::Foxf2::Foxb1::Foxb2::Foxj1::Foxj2::Foxj3::Foxd4::Foxd2::Foxd3::Foxs1::Foxd1::Foxl2::Foxl1	0	0	0	0	0	0	0	0	3.91117	0	0	0	8.13325	0	8.00042	3.74594
Module1	M5623_1.02	Meox1::Meox2	0	0	0	0	0	0	0	0	3.93422	0	0	0	0	0	0	0
Module1	M4635_1.02	Stat2	0	0	0	0	0	0	0	0	3.97759	0	0	0	0	0	0	0
Module1	M4551_1.02	Zfp110::Zfp369	0	0	0	0	0	0	0	0	4.12631	0	0	0	0	0	0	0
Module1	M5733_1.02	Pou5f1::Pou3f1::Pou2f2	0	0	0	0	0	0	0	0	4.75817	3.23544	0	0	0	0	0	0
Module1	M0718_1.02	Foxa1::Foxa3::Foxa2::Foxf1a::Foxc2::Foxc1::Foxk2::Foxk1::Foxg1::Foxe1::Foxe3::Foxi1::Foxi3::Foxi2::Foxf2::Foxb1::Foxb2::Foxj1::Foxj2::Foxj3::Foxd4::Foxd2::Foxd3::Foxs1::Foxd1::Foxl2::Foxl1	0	0	0	0	0	0	0	0	4.80427	0	0	0	6.30847	0	7.92925	3.90159
Module1	M5909_1.02	Hlf::Tef::Dbp	0	0	0	0	0	0	3.02569	0	0	0	0	0	0	0	0	0
Module1	M0727_1.02	ENSMUSG00000090020::Foxa1::Foxa3::Foxa2::Foxf1a::Foxc2::Foxc1::Foxk2::Foxk1::Foxg1::Foxe1::Foxe3::Foxi1::Foxi3::Foxi2::Foxf2::Foxb1::Foxb2::Foxj1::Foxj2::Foxj3::Foxd4::Foxd2::Foxd3::Foxs1::Foxd1::Foxl2::Foxl1::Foxn2	0	0	0	0	3.11634	0	0	0	0	0	0	3.16805	0	0	0	0
Module1	M1630_1.02	Tbx2::Tbx3::Tbx4::Tbx5	0	0	0	6.10627	0	0	0	0	0	0	0	0	0	0	7.88605	0
Module1	M1634_1.02	Tbx2::Tbx3::Tbx4::Tbx5	0	0	0	7.28742	0	0	0	0	0	0	0	0	0	0	9.98958	0
Module1	M6095_1.02	Sox3	0	0	3.27324	0	0	0	0	0	0	4.1773	0	0	0	0	0	0
Module1	M5694_1.02	Onecut3::Onecut2::Onecut1	0	3.08673	0	0	0	0	0	3.64881	0	0	0	0	0	0	0	0
Module1	M5695_1.02	Onecut3::Onecut2::Onecut1	0	3.22071	3.57671	0	0	0	0	0	0	0	0	0	0	0	0	0
Module2	M3401_1.02	Hmx1::Hmx3::Hmx2::NP_032283.3	0	0	0	0	0	0	0	0	0	0	0	0	0	0	0	3.11159
Module2	M0690_1.02	Etv1::Fev::Etv2::Etv5::Etv4::Gm5454::Fli1::Ets1::Ets2::Elk3::Erg::Elk1::ENSMUSG00000044690::Elk4::Gabpa	0	0	0	0	0	0	0	0	0	0	0	0	0	0	0	3.42396
Module2	M0710_1.02	Etv1::Fev::Etv2::Etv5::Etv4::Gm5454::Fli1::Ets1::Ets2::Elk3::Erg::Elk1::ENSMUSG00000044690::Elk4::Gabpa	0	0	0	0	0	0	0	0	0	0	0	0	0	0	0	3.92843
Module2	M6401_1.02	Crx::Otx1::Otx2::Otp::Prrxl1::Phox2a::Phox2b	0	0	0	0	0	0	0	0	0	0	0	0	0	3.10821	0	0
Module2	M2585_1.02	Rbpj::Rbpsuh-rs3	0	0	0	0	0	0	0	0	0	0	0	0	7.69186	7.27768	0	0
Module2	M1946_1.02	Ovol1	0	0	0	0	0	0	0	0	0	0	0	4.64806	0	3.57718	0	0
Module2	M5523_1.02	Hnf1b::Hnf1a	0	0	0	0	0	0	0	0	0	3.17387	0	0	3.05017	0	0	0
Module2	M1084_1.02	Nobox	0	0	0	0	0	0	0	0	0	3.55746	0	0	0	0	0	0
Module2	M2047_1.02	Pax5	0	0	0	0	0	0	0	0	3.02928	0	3.97744	5.38505	0	4.22089	0	3.29341
Module2	M1912_1.02	Rbpj::Rbpsuh-rs3	0	0	0	0	0	0	0	0	3.7797	0	0	0	8.05382	7.07795	0	0
Module2	M1434_1.02	Nr2f6::Nr2f1::Nr2f2	0	0	0	0	0	0	0	3.70441	0	0	0	0	0	0	0	0
Module2	M1495_1.02	Nr2c2::Nr2f6::Nr2f1::Nr2f2	0	0	0	0	0	0	0	3.9929	0	0	0	0	0	0	0	0
Module2	M0718_1.02	Foxa1::Foxa3::Foxa2::Foxf1a::Foxc2::Foxc1::Foxk2::Foxk1::Foxg1::Foxe1::Foxe3::Foxi1::Foxi3::Foxi2::Foxf2::Foxb1::Foxb2::Foxj1::Foxj2::Foxj3::Foxd4::Foxd2::Foxd3::Foxs1::Foxd1::Foxl2::Foxl1	0	0	0	0	10.9409	0	0	0	0	0	4.93508	3.08848	0	0	0	3.37121
Module2	M0757_1.02	Foxa1::Foxa3::Foxa2::Foxf1a::Foxc2::Foxc1::Foxk2::Foxk1::Foxg1::Foxe1::Foxe3::Gm5294::Foxi1::Foxi3::Foxi2::Foxf2::Foxb1::Foxb2::Foxj1::Foxj2::Foxj3::Foxd4::Foxd2::Foxd3::Foxs1::Foxd1::Foxl2::Foxl1	0	0	0	0	10.9479	0	0	0	3.20311	0	5.82766	0	3.17726	0	3.24802	3.75718
Module2	M0941_1.02	Pitx2::Pitx3::Pitx1	0	0	0	6.892	5.26498	0	0	0	0	0	0	0	0	0	0	0
Module2	M1031_1.02	Gm4830	0	0	0	6.958	5.53626	0	0	3.03726	0	0	0	0	0	3.51168	0	0
Module2	M6426_1.02	Pou5f1::Pou3f1::Pou2f2	0	0	3.01598	0	0	0	0	0	0	0	0	0	0	0	0	0
Module2	M6095_1.02	Sox3	0	0	3.52545	0	0	0	0	0	0	0	0	0	0	0	0	0
Module2	M6054_1.02	Msx1::Msx2::Msx3	0	3.12971	4.63193	0	0	0	0	0	0	0	0	0	0	0	0	0
Module2	M6280_1.02	Hmga2::Hmga1-rs1::Hmga1	0	3.43548	0	0	0	0	0	0	0	0	0	0	0	0	0	0
Module2	M4726_1.02	Tgif2::Tgif1	11.8954	5.05317	0	5.75691	5.31566	10.7447	3.5866	0	3.01731	8.85087	4.29078	0	3.81604	0	0	0
Module2	M2031_1.02	Pbx4::Pbx2::Pbx3::Pbx1	13.1423	5.80381	0	5.501	5.40333	11.0942	4.13641	0	3.54538	9.54734	3.5162	0	4.52661	0	0	0
Module3	M5715_1.02	Prrx1::Prrx2::Alx3::Arx::Alx1::Alx4::Otx2::Otp::Pax7::Shox2::Prrxl1::Phox2a::Phox2b::Crx::Rax	0	0	0	0	0	0	0	0	0	0	0	0	0	0	0	4.96018
Module3	M3298_1.02	Foxa1::Foxa3::Foxa2::Foxf1a::Foxc2::Foxc1::Foxk2::Foxk1::Foxg1::Foxe1::Foxe3::Gm5294::Foxi1::Foxi3::Foxi2::Foxf2::Foxb1::Foxb2::Foxq1::Foxj1::Foxj2::Foxj3::Foxd4::Foxd2::Foxd3::Foxs1::Foxd1::Foxl2::Foxl1	0	0	0	0	0	0	0	0	0	0	0	0	0	0	3.18961	0
Module3	M5716_1.02	Prrx1::Prrx2::Alx3::Arx::Alx1::Alx4::Otx2::Otp::Pax7::Shox2::Prrxl1::Phox2a::Phox2b::Crx::Rax	0	0	0	0	0	0	0	0	0	0	0	0	0	0	3.93075	5.35151
Module3	M5040_1.02	Pknox2::Meis3::Meis2::Meis1	0	0	0	0	0	0	0	0	0	0	0	3.16495	0	3.25625	0	0
Module3	M6062_1.02	Pknox2::Meis3::Pknox1::Meis1::Meis2	0	0	0	0	0	0	0	0	0	0	0	3.68479	0	0	0	0
Module3	M0211_1.02	Mlxip	0	0	0	0	0	0	0	0	0	0	0	3.72306	0	0	0	0
Module3	M1246_1.02	Pou5f1::Pou3f1::Pou2f2	0	0	0	0	0	0	0	0	0	3.09237	0	0	0	0	0	0
Module3	M5531_1.02	Hoxc9::Hoxc8::Hoxb8::Hoxb9::Hoxd8::Hoxd9::Hoxa6::Hoxd10::Hoxa10::Hoxc10::NP_032296.2::Hoxa9	0	0	0	0	0	0	0	0	0	3.13718	0	0	0	0	0	0
Module3	M1585_1.02	Tcf7::Lef1::Tcf7l2::Tcf7l1	0	0	0	0	0	0	0	4.20251	0	0	0	0	0	0	0	8.22359
Module3	M1587_1.02	Tcf7::Lef1::Tcf7l2	0	0	0	0	0	0	0	4.91272	0	0	0	3.48363	0	0	0	6.21966
Module3	M6502_1.02	Tbp::Tbpl2	0	0	0	0	0	3.41202	0	0	0	0	0	0	0	0	0	0
Module3	M1009_1.02	Hoxc8::Hoxb8::Hoxd8::Hoxd4::Hoxc5::Hoxd3::Hoxb6::Hoxb7::Hoxb4::Hoxc6::Hoxa7::Hoxa6::Hoxa5::Hoxa4::Hoxa3::Hoxb3::Pdx1::Hoxb5::Hoxc4	0	0	0	0	0	3.80182	0	0	0	0	0	0	0	0	0	0
Module3	M5192_1.02	Six4::Six5	0	0	0	0	0	3.9255	0	0	0	0	0	0	0	0	0	0
Module3	M2008_1.02	Six6::Six3	0	0	0	0	3.0942	0	0	0	0	0	0	0	0	0	0	0
Module3	M5941_1.02	Alx3::Alx1::Uncx::Alx4::Arx::Shox2::Vsx1::Vsx2::Otp	0	0	0	3.34196	0	0	0	0	0	0	0	0	0	0	0	0
Module3	M6044_1.02	Lhx8::NP_001076596.1::Lhx6	0	0	3.01008	0	0	0	0	0	0	0	0	0	0	0	0	0
Module3	M2585_1.02	Rbpj::Rbpsuh-rs3	0	3.41854	0	6.19546	0	0	0	0	5.67905	0	12.2147	6.33083	13.0575	13.6261	9.69711	0
Module3	M5597_1.02	Lhx9::Lhx2	0	3.49859	0	0	0	0	0	0	0	0	0	0	0	0	0	0
Module3	M1912_1.02	Rbpj::Rbpsuh-rs3	0	3.86638	3.00766	6.86049	0	0	0	0	5.03275	0	11.8428	5.05031	11.549	12.9488	9.12216	0
Module3	M6257_1.02	Gata6::Gata4::Gata5::Gata2::Gata3::Gata1	3.04033	0	0	0	0	0	0	0	0	0	0	0	0	0	0	0
Module3	M5625_1.02	Meox1::Meox2	3.12087	0	0	0	0	0	0	0	0	0	0	0	0	0	0	0
Module3	M0630_1.02	Dmrt1	3.36758	0	0	0	3.38604	0	0	0	0	0	0	0	0	0	0	0
Module3	M5718_1.02	Pitx2::Pitx3::Pitx1	3.4634	0	0	0	0	0	0	0	0	0	0	3.24805	0	0	0	3.79821
Module3	M6425_1.02	Pou3f1	3.51767	0	3.86666	0	0	0	0	0	0	0	0	0	0	0	0	0
Module3	M3617_1.02	Nfe2l2::Nfe2	3.52083	0	0	0	0	0	0	0	0	0	0	0	0	0	0	0
Module3	M2191_1.02	Tbp::Tbpl2	3.73527	0	0	0	0	0	0	0	0	0	0	0	0	0	0	0
Module3	M5714_1.02	Prrx1::Prrx2::Alx3::Arx::Alx1::Alx4::Otx2::Otp::Pax7::Shox2::Prrxl1::Phox2a::Phox2b::Crx::Rax	4.09046	0	4.75342	4.22506	0	0	0	0	0	0	0	0	0	0	0	0
Module3	M0863_1.02	Crx	4.40144	0	0	0	0	0	0	0	0	0	0	0	0	0	0	0
Module4	M2102_1.02	Foxj1::Foxj3::Foxk2::Foxk1::Foxg1::Foxc2::Foxd1::Foxd4	0	0	0	0	0	0	0	0	0	0	0	0	0	0	0	3.40805
Module4	M6386_1.02	Nr1i2	0	0	0	0	0	0	0	0	0	0	0	0	0	0	0	4.18218
Module4	M4734_1.02	Tcf4::Tcf3::Tcf12	0	0	0	0	0	0	0	0	0	0	0	0	0	3.16371	3.52008	4.16106
Module4	M6370_1.02	Nfkb2	0	0	0	0	0	0	0	0	0	0	0	0	3.10301	0	0	0
Module4	M4010_1.02	Tbp::Tbpl2	0	0	0	0	0	0	0	0	0	0	0	0	4.02243	3.34637	3.56418	3.17796
Module4	M4968_1.02	Tcf4::Tcf3::Tcf12	0	0	0	0	0	0	0	0	0	0	3.01262	3.25822	3.13929	3.15931	0	0
Module4	M6464_1.02	Smad2::Smad3	0	0	0	0	0	0	0	0	0	0	3.27301	3.35131	0	3.01865	0	0
Module4	M1999_1.02	Gsc2::Alx3::Alx1::Alx4::Gsc::Dmbx1	0	0	0	0	0	0	0	0	0	0	3.79995	3.08115	4.0781	4.07479	3.74314	0
Module4	M0306_1.02	Atf5::Atf4	0	0	0	0	0	0	3.11649	0	0	0	0	0	0	0	0	0
Module4	M5502_1.02	Gsx2::Hoxa4::Gsx1	0	0	0	0	0	3.40414	3.43297	3.45583	3.05777	0	0	0	0	0	0	0
Module4	M5040_1.02	Pknox2::Meis3::Meis2::Meis1	0	0	0	0	0	3.51111	0	0	0	0	0	3.41757	0	0	0	0
Module4	M1237_1.02	Pou2f1	0	0	0	0	0	3.67833	3.23513	3.09292	3.33858	0	3.35708	0	0	0	0	0
Module4	M6529_1.02	Ubp1::Tcfcp2l1::Tcfcp2	0	0	0	3.17681	3.01022	4.14116	4.32203	5.00422	5.35912	5.2993	6.30002	5.38643	5.47795	5.27726	4.60016	3.93703
Module4	M6504_1.02	Tbx2::Tbx3	0	0	0	3.27759	3.51622	0	0	0	0	0	0	0	0	0	0	0
Module4	M5694_1.02	Onecut3::Onecut2::Onecut1	0	0	0	3.29075	0	0	0	0	0	0	0	0	0	0	0	0
Module4	M6485_1.02	Spib::Spic::Sfpi1	0	3.13305	3.0257	3.0426	0	3.65706	3.06298	0	0	0	0	0	0	0	0	0
Module4	M5598_1.02	Lhx9::Lhx2	3.47656	0	0	0	0	0	0	0	0	0	0	0	0	0	0	0
Module4	M1582_1.02	Hmg20b	3.54741	4.04209	0	3.91685	3.71341	3.95305	4.25835	4.60662	4.70316	5.13864	0	0	0	0	0	0
Module4	M2008_1.02	Six6::Six3	3.9105	3.31169	0	0	0	0	0	0	0	0	0	0	0	0	0	0
Module4	M0632_1.02	Dmrta2::Dmrt3::Dmrta1	4.23121	3.47802	3.7112	3.68869	3.07477	0	0	0	0	0	0	0	0	0	0	0
Module5	M0757_1.02	Foxa1::Foxa3::Foxa2::Foxf1a::Foxc2::Foxc1::Foxk2::Foxk1::Foxg1::Foxe1::Foxe3::Gm5294::Foxi1::Foxi3::Foxi2::Foxf2::Foxb1::Foxb2::Foxj1::Foxj2::Foxj3::Foxd4::Foxd2::Foxd3::Foxs1::Foxd1::Foxl2::Foxl1	3.39214	3.41052	0	3.07266	0	0	0	0	0	0	0	0	0	0	0	0

## Sheet: Xie et al data set
Module	Motif	CommonRegulatorName	H1	Mesendoderm	Trophoblast	NeuralProgenitor	Mesenchymal
Module1	M6268_1.02	HAND1::HAND2	0	0	0	3.04104	0
Module1	M6529_1.02	TFCP2L1::UBP1	0	0	0	3.25029	0
Module1	M6181_1.02	ATF1::CREB1::CREM	0	0	0	3.68673	0
Module1	M5967_1.02	ZNF232	0	0	0	3.96809	0
Module1	M5824_1.02	SOX1::SOX14::SOX2::SOX21	0	0	0	4.01941	0
Module1	M1970_1.02	NFIA::NFIB::NFIC::NFIX	0	0	0	4.08253	0
Module1	M2304_1.02	NR5A1::NR5A2	0	0	0	4.23934	0
Module1	M4573_1.02	MAFF::MAFG::MAFK	0	0	0	5.0663	0
Module1	M0994_1.02	SIX1::SIX2::SIX4::SIX5	0	0	4.07707	0	0
Module1	M0952_1.02	SIX1::SIX2::SIX3::SIX4	0	0	4.3142	0	0
Module1	M4692_1.02	SIX4::SIX5	3.07042	0	0	0	0
Module1	M3089_1.02	ATF1::CREB1::CREM	3.35888	0	0	0	0
Module1	M2118_1.02	NFYA	3.40034	0	0	4.84969	0
Module1	M0174_1.02	MITF::TFE3::TFEB::TFEC	3.82705	0	0	0	11.0447
Module1	M0208_1.02	MITF::TFE3::TFEB::TFEC	3.85161	0	0	0	9.19383
Module1	M2041_1.02	IRX1::IRX2::IRX3::IRX4::IRX5::IRX6	4.34504	3.79081	0	0	0
Module1	M5040_1.02_M5267_1.02	MEIS1::MEIS2::MEIS3::PKNOX2::TGIF1::TGIF2	8.10934	4.34814	0	5.06066	0
Module2	M5408_1.02	ESRRA::ESRRB::ESRRG	0	0	0	0	3.16351
Module2	M1956_1.02	REST	0	0	0	0	3.18768
Module2	M4516_1.02	YY1::YY2::ZFP42	0	0	0	0	3.49089
Module2	M1917_1.02	USF1::USF2	0	0	0	0	4.00071
Module2	M6154_1.02	ATF4::ATF5	0	0	0	0	4.49937
Module2	M5045_1.02	EN1::EN2	0	0	0	0	5.90871
Module2	M0954_1.02	ALX1::ALX3::ALX4::ARX::CRX::DRGX::PHOX2A::PHOX2B::PRRX1::PRRX2::RAX::RAX2::VSX1::VSX2	0	0	0	3.11807	0
Module2	M1599_1.02	SOX1::SOX14::SOX2::SOX21	0	0	0	3.2166	0
Module2	M6427_1.02	POU4F1::POU4F2::POU4F3	0	0	0	3.31949	0
Module2	M4835_1.02	FOXP1::FOXP2::FOXP3::FOXP4	0	0	0	3.4128	0
Module2	M6138_1.02	REL::RELA	0	0	0	3.77474	0
Module2	M3546_1.02	PATZ1	0	0	0	3.92887	0
Module2	M5485_1.02	GCM1::GCM2	0	0	0	4.05566	0
Module2	M4664_1.02	FOXA1::FOXA2::FOXA3::FOXB1::FOXB2::FOXC1::FOXC2::FOXD1::FOXD2::FOXD3::FOXD4::FOXD4L1::FOXD4L2::FOXD4L3::FOXD4L4::FOXD4L5::FOXD4L6::FOXE1::FOXE3::FOXF1::FOXF2::FOXG1::FOXI1::FOXI2::FOXJ1::FOXJ2::FOXJ3::FOXK1::FOXK2::FOXL1::FOXL2::FOXQ1::FOXS1::KIAA0415	0	0	0	4.30554	0
Module2	M0635_1.02	DMRTC2	0	0	3.38604	5.64476	0
Module2	M6024_1.02	DBP::HLF::TEF	0	0	3.44003	0	0
Module2	M5904_1.02	TEAD1	0	0	3.83968	0	0
Module2	M1902_1.02	ALX1::ALX4::ARX::DRGX::PHOX2A::PHOX2B::PRRX1::PRRX2::RAX::RAX2::SHOX::SHOX2	0	0	3.90624	0	0
Module2	M0751_1.02	FOXC2::FOXD4::FOXD4L1::FOXG1::FOXJ1::FOXJ3::FOXK1::FOXK2::KIAA0415	0	0	4.11694	0	0
Module2	M2041_1.02	IRX1::IRX2::IRX3::IRX4::IRX5::IRX6	0	0	4.31389	0	5.59338
Module2	M2118_1.02	NFYA	0	0	5.1996	0	0
Module2	M5711_1.02	PAX1::PAX2::PAX5::PAX8::PAX9	0	0	6.22899	0	0
Module2	M6329_1.02	LHX1::LHX3::LHX4::LHX5	0	3.47928	0	0	0
Module2	M0108_1.02	ARID5A::ARID5B	0	3.48012	0	0	0
Module2	M6167_1.02	CDX1::CDX2::CDX4	0	3.68264	0	0	0
Module2	M0227_1.02	MAX	0	3.7973	0	0	0
Module2	M5100_1.02	MAX	0	3.83363	0	0	0
Module2	M0912_1.02	HOXA13::HOXB13::HOXC13::HOXD13	0	3.87238	0	0	0
Module2	M5582_1.02	IRX1::IRX2::IRX3::IRX4::IRX5::IRX6	0	4.00837	0	0	0
Module2	M5349_1.02	DUXA	0	4.16615	0	0	0
Module2	M5242_1.02	NKX2-3::NKX2-6	0	4.3937	0	0	0
Module2	M6281_1.02	HNF1A::HNF1B	0	5.43443	0	0	0
Module2	M1041_1.02	HOXA13::HOXB13::HOXC13::HOXD13	0	6.79754	0	0	0
Module2	M5157_1.02	ELK1::ELK3::ELK4::ENSG00000235187::ERF::ERG::ETS1::ETS2::ETV1::ETV2::ETV3::ETV4::ETV5::FEV::FLI1::GABPA	3.99133	0	0	0	0
Module2	M5779_1.02	RFX1::RFX2::RFX3::RFX4::RFX5::RFX6::RFX7::RFX8	4.20863	4.87593	0	0	0
Module2	M5766_1.02	RARA::RARB::RARG	6.4885	0	0	0	0
Module2	M5040_1.02_M5267_1.02	MEIS1::MEIS2::MEIS3::PKNOX2::TGIF1::TGIF2	12.1188	0	7.42578	0	0
Module3	M6194_1.02	E2F4::E2F5	0	0	0	0	3.57094
Module3	M0608_1.02	MLL	0	0	0	0	3.65565
Module3	M3312_1.02	GATA1::GATA2::GATA3::GATA4::GATA5::GATA6	0	0	0	0	3.93486
Module3	M6193_1.02	E2F4::E2F5	0	0	0	0	4.4215
Module3	M3134_1.02	E2F1	0	0	0	0	4.50361
Module3	M6025_1.02	HNF4A::HNF4G	0	0	0	0	5.06949
Module3	M6372_1.02	NFYB	0	0	0	0	5.18105
Module3	M0696_1.02	EHF::ELF3::ELF5	0	0	0	3.28037	0
Module3	M5426_1.02	ETV6::ETV7	0	0	0	3.53947	0
Module3	M0734_1.02	FOXA1::FOXA2::FOXA3::FOXB1::FOXB2::FOXC1::FOXC2::FOXD1::FOXD2::FOXD3::FOXD4::FOXD4L1::FOXD4L2::FOXD4L3::FOXD4L4::FOXD4L5::FOXD4L6::FOXE1::FOXE3::FOXF1::FOXF2::FOXG1::FOXI1::FOXI2::FOXJ1::FOXJ2::FOXJ3::FOXK1::FOXK2::FOXL1::FOXL2::FOXQ1::FOXS1::KIAA0415	0	0	0	4.38287	0
Module3	M1357_1.02	MYB::MYBL1	0	0	0	4.73624	0
Module3	M0732_1.02	FOXA1::FOXA2::FOXA3::FOXB1::FOXB2::FOXC1::FOXC2::FOXD1::FOXD2::FOXD3::FOXD4::FOXD4L1::FOXD4L2::FOXD4L3::FOXD4L4::FOXD4L5::FOXD4L6::FOXE1::FOXE3::FOXF1::FOXF2::FOXG1::FOXI1::FOXI2::FOXJ1::FOXJ2::FOXJ3::FOXK1::FOXK2::FOXL1::FOXL2::FOXQ1::FOXS1::KIAA0415	0	0	0	6.18734	3.20784
Module3	M5328_1.02	CREB3::CREB3L1::CREB3L2	0	0	3.34884	0	0
Module3	M5552_1.02	HOXC12::HOXD12	0	0	3.39712	0	0
Module3	M5800_1.02	AL662824.5::AL844527.7::CR354565.3::CR759733.4::CR936877.3::RXRA::RXRB::RXRG	0	0	3.53156	0	0
Module3	M5623_1.02	MEOX1::MEOX2	0	0	3.94067	0	0
Module3	M0415_1.02	KLF13::KLF14::KLF9	0	0	6.14894	0	0
Module3	M0994_1.02	SIX1::SIX2::SIX4::SIX5	0	0	6.66998	0	0
Module3	M0952_1.02	SIX1::SIX2::SIX3::SIX4	0	0	9.83727	0	0
Module3	M6528_1.02	YY1::YY2::ZFP42	0	3.12013	0	0	0
Module3	M6242_1.02	FOXA1::FOXA2::FOXA3::FOXB1::FOXB2::FOXC1::FOXC2::FOXD1::FOXD2::FOXD3::FOXD4::FOXD4L1::FOXD4L2::FOXD4L3::FOXD4L4::FOXD4L5::FOXD4L6::FOXE1::FOXE3::FOXF1::FOXF2::FOXG1::FOXI1::FOXI2::FOXJ1::FOXJ2::FOXJ3::FOXK1::FOXK2::FOXL1::FOXL2::FOXN2::FOXN3::FOXS1::KIAA0415	0	3.19652	0	0	0
Module3	M5471_1.02	FOXO1::FOXO3::FOXO4::FOXO6	0	3.24303	0	0	0
Module3	M4639_1.02	YY1::YY2::ZFP42	0	3.2719	0	0	0
Module3	M5452_1.02	FOXA1::FOXA2::FOXA3::FOXB1::FOXB2::FOXC1::FOXC2::FOXD1::FOXD2::FOXD3::FOXD4::FOXD4L1::FOXD4L2::FOXD4L3::FOXD4L4::FOXD4L5::FOXD4L6::FOXE1::FOXE3::FOXF1::FOXF2::FOXG1::FOXI1::FOXI2::FOXJ1::FOXJ2::FOXJ3::FOXK1::FOXK2::FOXL1::FOXL2::FOXQ1::FOXS1::KIAA0415	0	3.53583	0	0	0
Module3	M5543_1.02	AC012531.1::HOXA2::HOXA3::HOXA4::HOXA5::HOXA6::HOXA7::HOXB2::HOXB3::HOXB4::HOXB5::HOXB6::HOXB7::HOXB8::HOXC5::HOXC6::HOXC8::HOXD3::HOXD4::HOXD8::PDX1	0	3.71331	0	0	0
Module3	M1198_1.02	HOXA2::HOXB2	0	4.70125	0	0	0
Module3	M3018_1.02	CDC5L	0	4.80001	0	0	0
Module3	M1882_1.02	IRF1	0	4.82903	0	0	0
Module3	M1979_1.02_M1981_1.02_M1987_1.02_M1988_1.02_M1990_1.02_M1998_1.02_M2000_1.02_M2003_1.02_M2004_1.02_M2015_1.02_M2017_1.02_M2029_1.02_M2034_1.02_M2038_1.02_M2044_1.02_M2046_1.02_M2048_1.02_M2058_1.02_M2064_1.02_M2252_1.02_M2260_1.02_M4732_1.02_M4742_1.02_M4786_1.02_M4806_1.02_M4807_1.02_M4845_1.02_M4846_1.02_M4861_1.02_M4862_1.02_M4888_1.02_M4932_1.02_M4942_1.02_M4946_1.02_M4981_1.02_M4993_1.02_M49…	AC012531.1::ALX1::ALX3::ALX4::ARX::CRX::DRGX::EMX1::EMX2::EN1::EN2::ENSG00000229544::GBX1::GBX2::GSX1::GSX2::HLX::HOXA1::HOXA2::HOXA3::HOXA4::HOXA5::HOXA6::HOXA7::HOXA9::HOXB1::HOXB2::HOXB3::HOXB4::HOXB5::HOXB6::HOXB7::HOXB8::HOXC5::HOXC6::HOXC8::HOXC9::HOXD1::HOXD3::HOXD4::HOXD8::HOXD9::ISX::LBX1::LBX2::LHX1::LHX2::LHX3::LHX4::LHX5::LHX9::LMX1A::LMX1B::MEOX1::MEOX2::MNX1::NKX1-1::NKX6-1::NKX6-2:…	0	5.44507	0	0	0
Module3	M4727_1.02_M5042_1.02_M5268_1.02	MEIS1::MEIS2::MEIS3::PKNOX2::TGIF1::TGIF2	5.9047	0	0	0	0
Module3	M2016_1.02_M2035_1.02_M2059_1.02	MEIS1::MEIS2::MEIS3::PKNOX2::TGIF1::TGIF2	5.99988	0	0	0	0
Module3	M5040_1.02_M5267_1.02	MEIS1::MEIS2::MEIS3::PKNOX2::TGIF1::TGIF2	6.11296	11.1242	0	0	3.02794
Module4	M4524_1.02	TFAP2A::TFAP2B::TFAP2C::TFAP2D::TFAP2E	0	0	0	0	3.27822
Module4	M6313_1.02	IRF8	0	0	0	0	3.56982
Module4	M2307_1.02	PRDM1	0	0	0	0	3.76643
Module4	M5638_1.02	MSX1::MSX2	0	0	0	0	4.36456
Module4	M4733_1.02	ALX1::ALX3::ALX4::ARX::DRGX::OTP::PHOX2A::PHOX2B::RAX::UNCX::VSX1::VSX2	0	0	0	3.15098	0
Module4	M5956_1.02	YY1::YY2::ZFP42	0	0	0	3.42404	0
Module4	M3595_1.02	MZF1	0	0	3.26332	0	0
Module4	M5521_1.02	HNF1A::HNF1B	0	0	3.4781	0	0
Module4	M5328_1.02	CREB3::CREB3L1::CREB3L2	0	0	3.53779	0	0
Module4	M6509_1.02	TEAD4	0	0	3.55506	0	0
Module4	M5949_1.02_M5951_1.02	ALX1::ALX3::ALX4::ARX::RAX::RAX2::UNCX::VSX1::VSX2	0	0	3.69945	0	0
Module4	M0274_1.02	CEBPA::CEBPB::CEBPD::CEBPE	0	0	3.78576	0	0
Module4	M1902_1.02	ALX1::ALX4::ARX::DRGX::PHOX2A::PHOX2B::PRRX1::PRRX2::RAX::RAX2::SHOX::SHOX2	0	3.04459	0	6.09357	0
Module4	M6129_1.02	SOX1::SOX14::SOX2::SOX21	0	3.1931	0	0	0
Module4	M5862_1.02	SPDEF	0	3.65354	0	0	0
Module4	M6141_1.02	ALX1::ALX3::ALX4::ARX::DMBX1::DRGX::ISX::OTP::PHOX2A::PHOX2B::PRRX1::PRRX2::RAX::UNCX::VSX1::VSX2	0	3.89673	0	0	0
Module4	M4818_1.02	SCRT1::SCRT2	0	4.16311	0	0	0
Module4	M1950_1.02	ZNF354C	3.0154	0	0	0	0
Module4	M1453_1.02	RORA::RORB::RORC	3.14224	0	0	0	0
Module4	M0114_1.02	ARID3A::ARID3B::ARID3C	3.22489	0	0	0	0
Module4	M0313_1.02	CEBPG	3.3127	0	0	0	0
Module4	M5886_1.02	TBX1::TBX20	3.70379	0	0	0	0
Module4	M5329_1.02	CREB3::CREB3L1::CREB3L2	3.83404	0	0	0	0
Module1	dnase	dnase	0	0	0	0	8.85069
Module1	H3K27ac	H3K27ac	0	0	0	4.30417	0
Module1	H3K4me1	H3K4me1	0	0	5.61856	0	6.82631
Module1	H3K4me3	H3K4me3	0	3.1619	0	6.34743	0
Module1	H3K9ac	H3K9ac	0	3.68764	3.20272	0	0
Module1	H3K79me1	H3K79me1	3.89552	6.09038	14.5861	0	10.6914
Module1	H3K4me2	H3K4me2	6.05877	0	0	0	0
Module1	H3K36me3	H3K36me3	10.5108	9.54307	5.12495	11.7573	4.46765
Module1	H3K27me3	H3K27me3	12.2664	11.6864	5.27835	10.9013	6.98005
Module2	H3K9ac	H3K9ac	3.1886	4.20192	0	0	3.84903
Module2	H3K4me2	H3K4me2	3.27377	0	5.00766	0	7.28676
Module2	H3K27ac	H3K27ac	3.66854	0	4.02527	3.32912	0
Module2	dnase	dnase	3.85609	0	0	0	9.4085
Module2	H3K4me1	H3K4me1	4.68486	0	0	0	0
Module2	H3K4me3	H3K4me3	4.96253	4.52309	5.02618	7.22812	3.72792
Module2	H3K36me3	H3K36me3	7.06797	3.34046	0	8.37953	0
Module2	H3K79me1	H3K79me1	8.23171	11.0954	15.9746	0	8.04309
Module2	H3K27me3	H3K27me3	14.412	15.657	9.95332	16.9108	13.6718
Module3	dnase	dnase	0	0	0	3.60493	11.6348
Module3	H3K4me2	H3K4me2	0	6.36123	9.21652	3.14856	7.77318
Module3	H3K9ac	H3K9ac	0	9.53832	4.46284	0	6.68018
Module3	H3K4me1	H3K4me1	3.91942	0	0	0	5.2791
Module3	H3K4me3	H3K4me3	4.7958	5.21057	4.03299	7.52386	0
Module3	H3K27ac	H3K27ac	6.68792	0	6.46872	8.59694	0
Module3	H3K79me1	H3K79me1	7.39756	5.9374	12.8838	0	0
Module3	H3K36me3	H3K36me3	12.3027	9.58857	3.11232	9.71138	8.09083
Module3	H3K27me3	H3K27me3	13.0316	13.3586	11.5316	14.6849	11.0691
Module4	dnase	dnase	0	0	0	0	4.21093
Module4	H3K9ac	H3K9ac	0	0	3.72082	0	0
Module4	H3K79me1	H3K79me1	0	0	6.46797	0	0
Module4	H3K4me2	H3K4me2	0	0	7.4131	0	0
Module4	H3K4me3	H3K4me3	0	3.56774	0	3.67555	0
Module4	H3K27ac	H3K27ac	4.42387	0	5.80823	5.7165	9.37518
Module4	H3K36me3	H3K36me3	8.80812	7.88604	0	7.76571	8.89074
Module4	H3K27me3	H3K27me3	9.39475	10.3295	6.05242	8.80643	0

## Sheet: Chronis et al data set
Module	Motif	CommonRegulatorName	esc	pips1	mef48	mef
Module1	H3K27me3	H3K27me3	0	0	1.06964	1.24246
Module2	H3K4me3	H3K4me3	0	1.26832	1.47334	0
Module2	H3K27ac	H3K27ac	0	1.27221	1.08965	0
Module2	H3K9ac	H3K9ac	0	1.30157	0	0
Module2	H3K4me2	H3K4me2	1.23488	0	0	1.3799
Module2	H3K79me2	H3K79me2	1.3989	1.53803	1.84984	1.74119
Module2	H3K27me3	H3K27me3	1.48767	2.14852	1.70222	1.67233
Module3	H3K9me3	H3K9me3	0	0	0	1.418
Module3	H3K4me3	H3K4me3	0	0	1.09877	0
Module3	H3K27ac	H3K27ac	1.57676	0	0	0
Module3	H3K9ac	H3K9ac	1.63614	0	0	0
Module3	H3K27me3	H3K27me3	1.96661	1.86333	1.51248	1.10291
Module3	H3K79me2	H3K79me2	3.59258	2.74828	2.36432	2.1475
Module4	H3K9me3	H3K9me3	0	0	0	1.08028
Module4	H3K9ac	H3K9ac	1.40391	0	0	0
Module4	H3K27ac	H3K27ac	1.99193	0	0	0
Module4	H3K27me3	H3K27me3	2.80418	2.23446	1.18962	0
Module4	H3K79me2	H3K79me2	3.29543	3.78762	2.82184	2.95009
Module5	H3K4me3	H3K4me3	1.02805	0	0	0
Module5	H3K9ac	H3K9ac	1.82886	0	0	0
Module5	H3K4me2	H3K4me2	2.39623	0	1.10904	0
Module5	H3K27ac	H3K27ac	2.66694	0	0	0
Module5	H3K27me3	H3K27me3	2.67659	2.01618	0	0
Module5	H3K79me2	H3K79me2	3.22139	3.11285	2.37873	1.99056
Module6	H3K4me2	H3K4me2	1.63597	1.48346	1.35794	1.12073
Module6	H3K4me1	H3K4me1	1.68415	1.34857	1.39571	0
Module6	H3K27me3	H3K27me3	1.90773	1.01915	0	0
Module6	H3K79me2	H3K79me2	2.34264	2.6288	1.80746	1.50436
Module7	H3K4me1	H3K4me1	2.32605	2.36485	2.0836	2.09081
Module1	Zfp143	Zfp143	0	0	1.03138	0
Module1	Nfe2l2	Nfe2l2	0	0	1.0438	0
Module1	Irf3	Irf3	0	0	1.31115	0
Module1	Rfx4	Rfx4	0	0	1.47183	1.29025
Module1	Nrg1	Nrg1	0	1.00853	0	0
Module1	Mtf1	Mtf1	0	1.47612	0	0
Module1	Zfp40	Zfp40	0	1.67248	0	0
Module1	Foxj3	Foxj3	0	2.50143	1.86411	1.50572
Module1	Zfp423	Zfp423	1.00734	0	0	0
Module1	Insm1	Insm1	1.00907	0	0	0
Module1	Eomes	Eomes	1.02567	0	0	0
Module1	Tfcp2l1	Tfcp2l1	1.02867	0	1.28542	0
Module1	Max	Max	1.28248	0	0	0
Module1	Sox13	Sox13	1.82486	1.44361	1.15346	0
Module1	Esrrb	Esrrb	1.89769	0	0	0
Module2	Max	Max	0	0	1.00273	0
Module2	Foxi1	Foxi1	0	0	1.05379	0
Module2	Tbp	Tbp	0	0	1.0854	0
Module2	Spz1	Spz1	0	0	1.10116	0
Module2	Zbtb7b	Zbtb7b	0	0	1.10454	0
Module2	Rfx4	Rfx4	0	0	1.13652	0
Module2	Glis2	Glis2	0	0	1.71145	0
Module2	Zfp40	Zfp40	0	1.03953	0	0
Module2	Eomes	Eomes	0	1.06231	0	0
Module2	Rora	Rora	0	1.06658	0	0
Module2	Hbp1	Hbp1	0	1.10547	0	0
Module2	Foxk1	Foxk1	0	1.12818	0	0
Module2	Insm1	Insm1	1.02734	1.17891	0	0
Module2	Zfp105	Zfp105	1.07981	1.76952	0	0
Module2	Sox17	Sox17	1.22412	0	0	0
Module2	Foxj3	Foxj3	1.33492	0	1.53981	1.21955
Module2	Nfe2l2	Nfe2l2	1.3538	0	0	0
Module2	Sox13	Sox13	1.37725	0	0	0
Module2	Tfap2b	Tfap2b	1.45669	0	0	0
Module2	Nr2f1	Nr2f1	1.52966	1.43646	0	0
Module2	Pparg	Pparg	1.71139	0	0	0
Module2	atac	atac	2.0465	0	1.46914	1.24028
Module3	Zbtb7b	Zbtb7b	0	0	1.09783	0
Module3	Foxa1	Foxa1	0	0	1.19018	0
Module3	Sox17	Sox17	0	0	1.29143	0
Module3	Gata1	Gata1	0	0	1.34256	1.72101
Module3	Nr2f1	Nr2f1	0	1.08866	0	0
Module3	Tfap2b	Tfap2b	1.02026	0	0	0
Module3	Tcf3	Tcf3	1.02458	0	0	0
Module3	Elk1	Elk1	1.10451	0	0	0
Module3	Stat3	Stat3	1.12498	0	0	0
Module3	Tead1	Tead1	1.34942	1.11891	0	0
Module3	atac	atac	1.57298	1.02994	1.86413	1.64085
Module4	Sox4	Sox4	0	0	0	1.02968
Module4	Zbtb12	Zbtb12	0	0	0	1.22409
Module4	Rxra	Rxra	0	0	1.03461	0
Module4	Rara	Rara	0	0	1.10957	1.03775
Module4	Foxa1	Foxa1	0	0	1.2326	0
Module4	Esrrb	Esrrb	0	1.08023	0	0
Module4	Foxj1	Foxj1	0	1.09582	0	0
Module4	Srf	Srf	0	1.17221	0	0
Module4	Zfp40	Zfp40	0	1.34129	0	0
Module4	Zfp105	Zfp105	0	1.82774	0	0
Module4	Irf9	Irf9	1.01169	0	0	1.27039
Module4	En1	En1	1.09562	1.35115	0	0
Module4	Glis2	Glis2	1.10253	0	0	1.27233
Module4	Sox13	Sox13	1.13844	1.82141	0	0
Module4	Jdp2	Jdp2	1.29027	0	0	0
Module4	Gata1	Gata1	1.3843	0	0	0
Module4	Esr2	Esr2	1.38476	0	0	0
Module4	atac	atac	1.80248	0	1.64938	1.39799
Module5	Zbtb7b	Zbtb7b	0	0	1.02817	0
Module5	Zscan26	Zscan26	0	0	1.03304	0
Module5	Osr1	Osr1	0	0	1.05495	0
Module5	Zic3	Zic3	0	0	1.06095	0
Module5	Sox5	Sox5	0	0	1.13912	1.01383
Module5	Lef1	Lef1	0	0	1.31006	0
Module5	Hnf1a	Hnf1a	0	0	1.68061	1.24191
Module5	Zbtb12	Zbtb12	0	1.0126	0	0
Module5	Zfp691	Zfp691	0	1.0562	0	0
Module5	Bhlhe40	Bhlhe40	0	1.09085	0	0
Module5	Mycn	Mycn	0	1.14071	0	0
Module5	Foxi1	Foxi1	0	1.33281	0	1.41235
Module5	Foxk1	Foxk1	0	1.82001	0	0
Module5	Rxra	Rxra	1.11184	0	1.48758	1.00873
Module5	Esr2	Esr2	1.13476	0	0	0
Module5	Tfap2e	Tfap2e	1.14224	0	0	0
Module5	Nfe2l2	Nfe2l2	1.25079	0	1.0307	0
Module5	Foxa1	Foxa1	1.27187	0	0	0
Module5	Gata1	Gata1	1.33866	2.77658	0	0
Module5	atac	atac	1.82733	1.41147	1.7439	1.48635
Module5	Tbp	Tbp	1.90077	1.88453	0	0
Module6	Foxl1	Foxl1	0	0	0	1.02458
Module6	Mtf1	Mtf1	0	0	0	1.08036
Module6	Mzf1	Mzf1	0	0	1.0298	0
Module6	atac	atac	0	0	1.05509	0
Module6	Irf3	Irf3	0	0	1.27589	0
Module6	Bhlhe40	Bhlhe40	0	0	1.33879	1.10195
Module6	Esrrb	Esrrb	0	1.01895	0	0
Module6	Mycn	Mycn	0	1.13372	0	0
Module6	Pparg	Pparg	0	1.84767	0	0
Module6	Sox17	Sox17	1.03054	0	0	0
Module6	Rxra	Rxra	1.24436	0	0	0
Module6	Nfe2l2	Nfe2l2	1.42452	1.36902	0	0
Module6	Mafk	Mafk	2.42617	0	1.27431	1.16123
Module7	Sp1	Sp1	0	0	1.02654	0
Module7	Ebf1	Ebf1	0	0	1.49293	1.29346
Module7	Zfx	Zfx	0	1.03403	1.31559	1.2092
Module7	Bhlhe40	Bhlhe40	0	1.28155	1.42869	1.36003
Module7	Insm1	Insm1	1.07632	1.27299	1.24357	1.11464

## Sheet: Sriharan lab data set
Module	Motif/Chromatin mark	CommonRegulatorName	mef	pips	ips
Module1	Ctcf	Ctcf	0	0	1.01322
Module1	Zfx	Zfx	0	0	1.01432
Module1	Mafb	Mafb	0	0	1.26632
Module1	Irx6	Irx6	0	1.05483	0
Module1	Hoxb9	Hoxb9	0	1.43251	0
Module1	Sox8	Sox8	1.05313	0	0
Module1	Sox11	Sox11	1.14748	1.08358	1.23135
Module1	Rfx4	Rfx4	1.20246	0	0
Module1	Pax5	Pax5	1.27074	1.1327	1.13788
Module1	Hic1	Hic1	1.34091	1.53943	1.60551
Module1	Gabpa	Gabpa	1.38616	0	0
Module1	Rbpj	Rbpj	1.62775	0	0
Module2	Rfx4	Rfx4	0	0	1.18319
Module2	Zfx	Zfx	0	0	1.2853
Module2	Hic1	Hic1	0	1.11624	1.13432
Module2	Pparg	Pparg	0	1.14806	0
Module2	Zbtb12	Zbtb12	0	1.38768	0
Module2	Sox11	Sox11	0	1.61932	1.09585
Module2	Zfp128	Zfp128	1.05513	1.13862	0
Module2	Ascl2	Ascl2	1.05993	0	0
Module2	E2f2	E2f2	1.06452	1.55405	0
Module2	Hoxb13	Hoxb13	1.19476	0	0
Module2	Lef1	Lef1	1.22155	1.43032	1.26432
Module2	Myf6	Myf6	1.32806	0	0
Module2	Insm1	Insm1	1.33822	1.64864	0
Module2	Gabpa	Gabpa	1.40274	0	1.09128
Module2	Osr2	Osr2	1.66625	0	1.41859
Module3	Nkx2-2	Nkx2-2	0	0	1.2715
Module3	Zfx	Zfx	0	1.02888	0
Module3	Hoxb9	Hoxb9	0	1.05809	0
Module3	Pparg	Pparg	0	1.08756	0
Module3	Sox8	Sox8	0	1.63292	0
Module3	Osr2	Osr2	1.11555	1.84565	1.95825
Module4	Runx1	Runx1	0	0	1.16617
Module4	Tead1	Tead1	0	1.0449	0
Module4	Cux1	Cux1	1.0265	0	1.15665
Module4	Hoxa10	Hoxa10	1.14046	1.23412	1.11357
Module5	Irf3	Irf3	0	0	1.02087
Module5	Smad3	Smad3	0	0	1.07573
Module5	Stat3	Stat3	0	0	1.23664
Module5	Tcf3	Tcf3	0	0	1.31287
Module5	Zfp105	Zfp105	0	0	2.41542
Module5	Rest	Rest	0	1.15473	0
Module5	Nkx6-1	Nkx6-1	0	1.45802	0
Module5	Sox2	Sox2	0	2.25083	1.14907
Module5	Runx1	Runx1	1.4543	0	1.15568
Module6	Dbx1	Dbx1	0	0	1.03643
Module6	Sp4	Sp4	0	0	1.36846
Module6	Sox7	Sox7	0	0	1.65014
Module6	Foxj3	Foxj3	0	0	1.76119
Module6	Mecom	Mecom	0	1.1964	0
Module6	Pparg	Pparg	0	1.41745	0
Module6	Zbtb3	Zbtb3	0	1.61398	0
Module6	Sp1	Sp1	1.01058	2.2747	0
Module6	Tfap2a	Tfap2a	1.03759	0	0
Module6	En1	En1	1.09476	0	0
Module6	Insm1	Insm1	1.19334	0	1.2184
Module6	Tgif1	Tgif1	1.80291	0	0
Module7	Tfap2e	Tfap2e	0	0	1.08255
Module7	Foxl1	Foxl1	0	0	1.71669
Module7	Sp4	Sp4	0	1.51746	1.23429
Module7	Rreb1	Rreb1	1.24306	1.31307	0
Module7	Foxd3	Foxd3	1.34142	1.14157	1.25283
Module7	Sp1	Sp1	1.43859	1.84878	1.65084
Module7	Srf	Srf	1.91884	0	0
Module	Motif	CommonRegulatorName	mef	pips	ips
Module1	H3K14ac	H3K14ac	0	0	1.67699
Module1	H3K9me3	H3K9me3	2.53804	3.81034	2.5156
Module1	H3K9ac	H3K9ac	4.49984	4.01855	5.21577
Module1	H3K18ac	H3K18ac	4.77945	4.39813	4.2649
Module2	H3K9me3	H3K9me3	0	0	1.3569
Module2	H3K14ac	H3K14ac	1.54225	0	0
Module2	H3K27me3	H3K27me3	1.85243	2.99735	2.08435
Module2	H3K9ac	H3K9ac	2.17868	1.4211	5.49574
Module2	H3K4me3	H3K4me3	2.61142	2.8863	2.12822
Module2	H3K18ac	H3K18ac	3.84371	3.29263	2.07788
Module2	H3K79me2	H3K79me2	4.54558	4.83889	2.88938
Module3	H3K9me3	H3K9me3	0	1.38009	0
Module3	H3K9ac	H3K9ac	0	1.62218	2.07347
Module3	H3K4me3	H3K4me3	1.02203	1.16888	2.57637
Module3	H3K9me2	H3K9me2	1.1847	0	0
Module3	H3K14ac	H3K14ac	1.24937	0	0
Module3	H3K27me3	H3K27me3	1.55703	1.82338	2.00653
Module3	H3K18ac	H3K18ac	2.69467	2.44338	0
Module3	H3K79me2	H3K79me2	3.42177	3.3478	3.04022
Module4	H3K4me3	H3K4me3	0	0	2.16517
Module4	H3K27me3	H3K27me3	0	1.98785	1.94783
Module4	H3K79me2	H3K79me2	2.5125	2.62859	2.90871
Module4	H3K18ac	H3K18ac	3.29753	2.64601	1.32215
Module5	H3K4me3	H3K4me3	0	0	2.07105
Module5	H3K27me3	H3K27me3	0	0	2.56679
Module5	H3K9me3	H3K9me3	0	1.28729	0
Module5	H3K14ac	H3K14ac	1.87683	0	0
Module5	H3K79me2	H3K79me2	2.70144	3.043	4.39712
Module5	H3K18ac	H3K18ac	4.92999	4.91386	2.48957
Module6	H3K4me3	H3K4me3	0	0	1.71068
Module6	H3K9ac	H3K9ac	0	0	1.73769
Module6	H3K27me3	H3K27me3	0	0	1.91453
Module6	H3K14ac	H3K14ac	1.97626	0	0
Module6	H3K79me2	H3K79me2	2.7168	3.85618	4.79332
Module6	H3K18ac	H3K18ac	5.61334	5.30933	3.45104
Module7	H3K14ac	H3K14ac	1.01	0	0
Module7	H3K9ac	H3K9ac	1.27287	2.64627	3.49626
Module7	H3K18ac	H3K18ac	3.16496	2.41352	1.08911
